# Supplementary material for: Cohesin-independent STAG proteins interact with RNA and R-loops and promote complex loading
Source: eLife journal article supplement (doi:10.7554/elife.79386), 2023-04-03
Supplement: fig1-figsupp1-data1 [file Source Data_SUPP Figure 1.pdf › Figure 1 - figure supplement 1 - source data 1/Source Data_SUPP Figure 1.pdf]

Figure S1a Source Data.

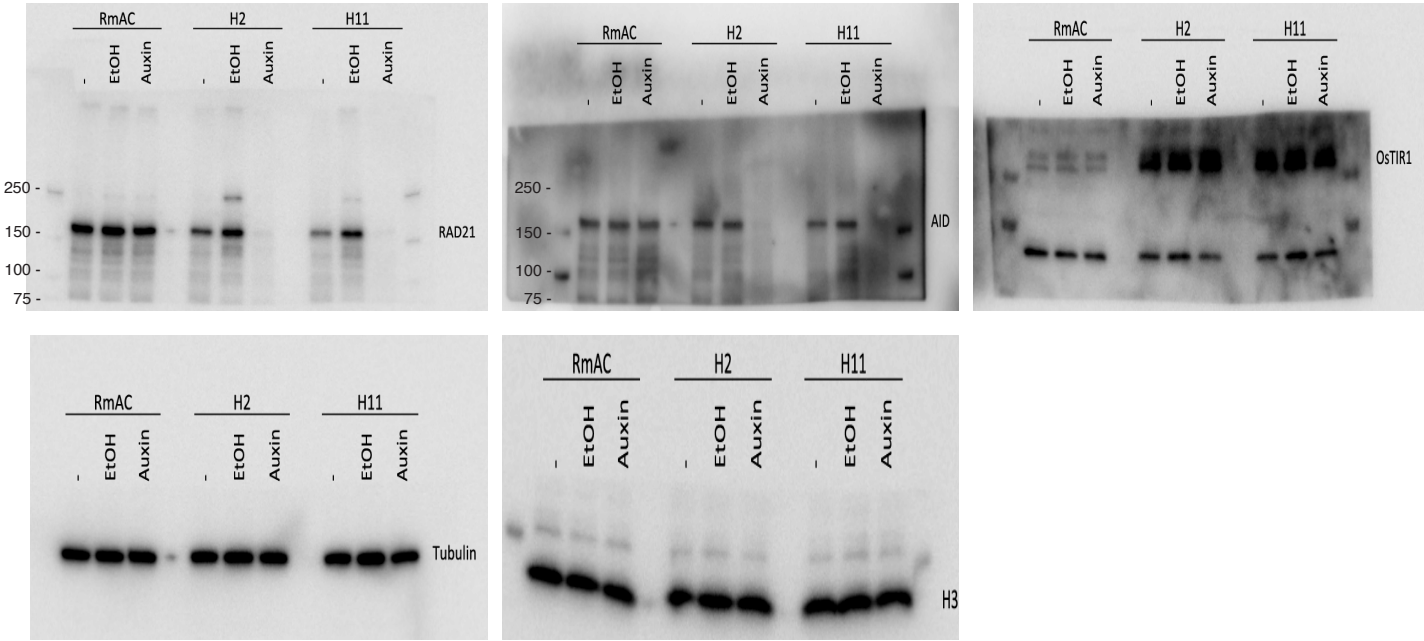

Figure S1c Source Data.

These were among the earliest experiments done and we are unable to find the uncropped blot images for this data.
