# Supplementary material for: Cohesin-independent STAG proteins interact with RNA and R-loops and promote complex loading
Source: eLife journal article supplement (doi:10.7554/elife.79386), 2023-04-03

Figure S3a -e, full blots for CLIP experiments are already shown in the Supplementary file.

Figure S3h source data.

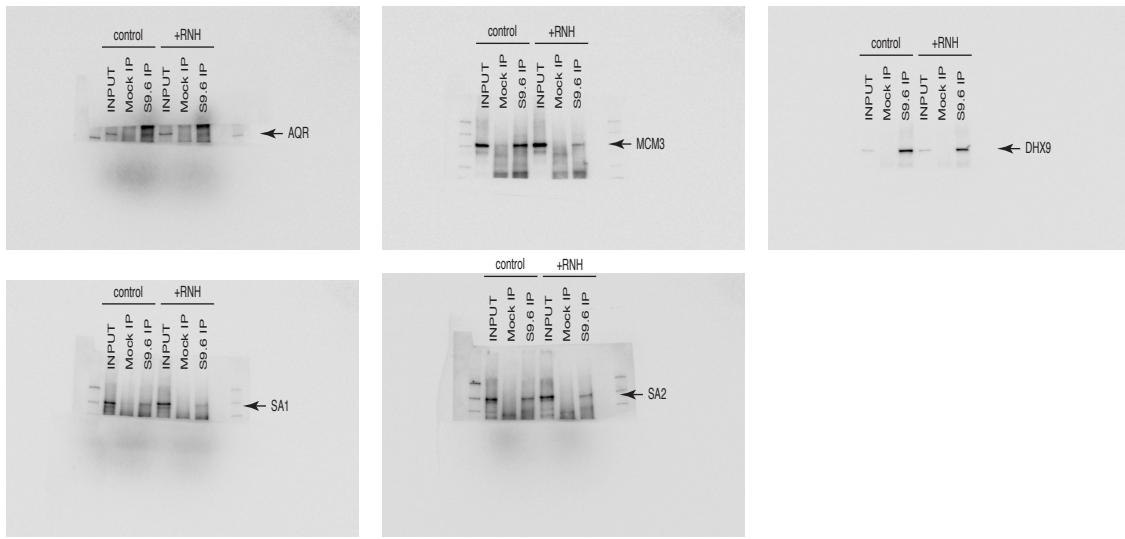

Supplement: fig3-figsupp1-data1 [file Source Data_SUPP Figure 3_v2.pdf › Figure 3 - figure supplement 1 - source data 1/Source Data_SUPP Figure 3_v2.pdf]
