# Supplementary material for: Cohesin-independent STAG proteins interact with RNA and R-loops and promote complex loading
Source: eLife journal article supplement (doi:10.7554/elife.79386), 2023-04-03
Supplement: fig5-data1 [file Source Data_Figure 5.pdf › Figure 5 - source data 1/Source Data_Figure 5.pdf]

**A**

| YFP-SA2 |     |      |      |
|---------|-----|------|------|
| SA2     | IgG | e32Δ | e32+ |
|         |     |      |      |

P32 RNA

**B**

| YFP-SA2 |     |      |      |                    |
|---------|-----|------|------|--------------------|
| SA2     | IgG | e32Δ | e32+ |                    |
|         |     |      |      | ← SA2-YFP<br>← SA2 |

**C**

| Vehicle |     |      | SA2 <sup>e32Δ</sup> |     |      | SA2 <sup>e32+</sup> |     |      |       |
|---------|-----|------|---------------------|-----|------|---------------------|-----|------|-------|
| inp     | IgG | S9.6 | inp                 | IgG | S9.6 | inp                 | IgG | S9.6 |       |
|         |     |      |                     |     |      |                     |     |      | ← AQR |

**D**

| Vehicle |     |      | SA2 <sup>e32Δ</sup> |     |      | SA2 <sup>e32+</sup> |     |      |        |
|---------|-----|------|---------------------|-----|------|---------------------|-----|------|--------|
| inp     | IgG | S9.6 | inp                 | IgG | S9.6 | inp                 | IgG | S9.6 |        |
|         |     |      |                     |     |      |                     |     |      | ← MCM3 |

**E**

| Vehicle |     |      | SA2 <sup>e32Δ</sup> |     |      | SA2 <sup>e32+</sup> |     |      |                          |
|---------|-----|------|---------------------|-----|------|---------------------|-----|------|--------------------------|
| inp     | IgG | S9.6 | inp                 | IgG | S9.6 | inp                 | IgG | S9.6 |                          |
|         |     |      |                     |     |      |                     |     |      | ← SA2-YFP<br>← endo. SA2 |
