# Supplementary material for: Cohesin-independent STAG proteins interact with RNA and R-loops and promote complex loading
Source: eLife. 2023 Apr 3;12:e79386. doi: 10.7554/eLife.79386 (PMC10238091; doi:10.7554/eLife.79386)
Supplement: Figure 2—figure supplement 1—source data 2. [file elife-79386-fig2-figsupp1-data2.xlsx]

## Sheet: Sheet1
Figure 2 - figure supplement 1 - source data 2. Table in a)
Name	Protein Accession	Protein Name	Motif
CTCF	P49711	Transcriptional repressor CTCF	dvdvsVYDFEEEqqegl
MCM3	P25205	DNA replication licensing factor MCM3	gdsydPYDFSDTEeempq
HNRNPUL2	Q1KMD3	Heterogeneous nuclear ribonucleoprotein U-like protein 2	ehgraYYEFREEayhsr
CHD6	Q8TD26	Chromodomain-helicase-DNA-binding protein 6	qkhrrPYEFEVErdak
ESYT2	A0FGR8	Extended synaptotagmin-2	sqrrsAFGFDDgnfpg
