# Supplementary material for: Cohesin-independent STAG proteins interact with RNA and R-loops and promote complex loading
Source: eLife. 2023 Apr 3;12:e79386. doi: 10.7554/eLife.79386 (PMC10238091; doi:10.7554/eLife.79386)
Supplement: Figure 2—source data 2. [file elife-79386-fig2-data2.xlsx]

## Sheet: MSstats_Group comparison
X1	ProteinGroup	Label	log2FC	SE	Tvalue	DF	pvalue	adj.pvalue	issue	MissingPercentage	ImputationPercentage	LeadProt	ProteinName	GeneName	GO (biological process)	GO (cellular component)	GO (molecular function)	Mock Proteins	CRAPome
1	A0A024QYX7;B3KNZ4;B4DRU0;B4DVU3;B4E2Z6;B4DDN4;B4DVQ5;A1KYQ7;A0A024QYU9;Q99613;B5ME19	Sa1-IAA	1.55363	0.763928	2.03374	1	0.290928	0.783886	NA	0.714286	0	A0A024QYX7	Eukaryotic translation initiation factor 3 subunit C;Eukaryotic translation initiation factor 3 subunit C-like protein	EIF3C;EIF3CL	formation of cytoplasmic translation initiation complex [GO:0001732]	eukaryotic 43S preinitiation complex [GO:0016282]; eukaryotic 48S preinitiation complex [GO:0033290]; eukaryotic translation initiation factor 3 complex [GO:0005852]	translation initiation factor activity [GO:0003743]; translation initiation factor binding [GO:0031369]	NA	109
2	A0A024QYZ9;Q9P209	Sa1-IAA	1.29646	0.34916	3.71307	0	NA	NA	NA	0.571429	0	A0A024QYZ9	Centrosomal protein of 72 kDa	CEP72	regulation of protein localization to centrosome [GO:1904779]	centrosome [GO:0005813]	NA	NA	4
3	A0A024QZC0;A0A024QZB7;A0A024QZ91;Q8WWM7;H3BUF6;H3BSK9;H3BUE3;H3BRB0;A0A0C4DGL7	Sa1-IAA	0.128623	0.425374	0.302377	5	0.774539	0.948207	NA	0.642857	0	A0A024QZC0	Ataxin-2-like protein	ATXN2L	NA	NA	NA	NA	127
4	A0A024QZD5;P08621;A8KAQ5;M0QYR1;B3KPV0;M0QX04;Q9UFS1	Sa1-IAA	-0.35181	0.403272	-0.872387	7	0.411919	0.821036	NA	0.493506	0	A0A024QZD5	U1 small nuclear ribonucleoprotein 70 kDa	SNRP70;SNRNP70	positive regulation of mRNA splicing, via spliceosome [GO:0048026]	nuclear speck [GO:0016607]; nucleoplasm [GO:0005654]; viral nucleocapsid [GO:0019013]	U1 snRNA binding [GO:0030619]	NA	108
5	A0A024QZH6;Q9H7N4;A0A2U8BR45;A0A2U8BR29;A0A2U8BR37;A0A2U8BR44;A0A2U8BR54	Sa1-IAA	-0.549812	0.224732	-2.44652	4	0.0707099	0.618718	NA	0.619048	0	A0A024QZH6	Splicing factor, arginine/serine-rich 19	SR-A1;SCAF1	NA	NA	NA	NA	24
6	A0A024QZP6;Q9P0M6;Q9HA11;Q5SQT3	Sa1-IAA	-0.315448	0.274075	-1.15096	3	0.333163	0.790424	NA	0.714286	0	A0A024QZP6	Core histone macro-H2A;Core histone macro-H2A.2;Histone H2A	H2AFY2	nucleosome assembly [GO:0006334]	nuclear chromatin [GO:0000790]; nucleoplasm [GO:0005654]; nucleosome [GO:0000786]	chromatin DNA binding [GO:0031490]; protein heterodimerization activity [GO:0046982]	NA	29
7	A0A024QZU8;Q92766;A0A087X055;C9JU34	Sa1-IAA	-0.477578	0.298927	-1.59764	3	0.20841	0.731578	NA	0.571429	0	A0A024QZU8	Ras-responsive element-binding protein 1	RREB1	NA	fibrillar center [GO:0001650]; nuclear speck [GO:0016607]	NA	NA	13
8	A0A024QZW2;Q9UMY1;H7C2B1	Sa1-IAA	-0.910571	0.679966	-1.33914	4	0.251557	0.761092	NA	0.714286	0	A0A024QZW2	Nucleolar protein 7	NOL7	NA	nucleus [GO:0005634]	NA	NA	11
9	A0A024QZW7;P49790	Sa1-IAA	-0.209752	0.334107	-0.627799	7	0.550059	0.868716	NA	0.518797	0	A0A024QZW7	Nuclear pore complex protein Nup153	NUP153	NA	NA	metal ion binding [GO:0046872]	NA	48
10	A0A024QZY5;Q13523;B4DZQ5;H0YDJ3;Q15456;D3DWH5	Sa1-IAA	-0.675368	0.291317	-2.31832	7	0.0535265	0.615638	NA	0.55102	0	A0A024QZY5	Serine/threonine-protein kinase PRP4 homolog	PRPF4B	NA	chromosome [GO:0005694]; nuclear speck [GO:0016607]	ATP binding [GO:0005524]; protein kinase activity [GO:0004672]	NA	36
11	A0A024R0E3;Q8TAA9	Sa1-IAA	-0.975716	NA	NA	0	NA	NA	NA	0.714286	0	A0A024R0E3	Vang-like protein 1	VANGL1	multicellular organism development [GO:0007275]; pigmentation [GO:0043473]	integral component of membrane [GO:0016021]; lateral plasma membrane [GO:0016328]	NA	NA	8
12	A0A024R0F6;Q9UPN9;H0Y612;B3KN30;Q9HAL0;B4DXI9	Sa1-IAA	-0.00527506	0.436059	-0.0120971	7	0.990686	0.996403	NA	0.460317	0	A0A024R0F6	E3 ubiquitin-protein ligase TRIM33	TRIM33	NA	nucleus [GO:0005634]	DNA binding [GO:0003677]; zinc ion binding [GO:0008270]	NA	10
13	A0A024R0H6;Q8N7H5;B4DGJ5	Sa1-IAA	-1.50336	1.16843	-1.28665	0	NA	NA	NA	0.714286	0	A0A024R0H6	RNA polymerase II-associated factor 1 homolog	PAF1	cellular response to lipopolysaccharide [GO:0071222]; endodermal cell fate commitment [GO:0001711]; histone modification [GO:0016570]; negative regulation of transcription by RNA polymerase II [GO:0000122]; stem cell population maintenance [GO:0019827]; transcription elongation from RNA polymerase II promoter [GO:0006368]	Cdc73/Paf1 complex [GO:0016593]; cell junction [GO:0030054]; nucleoplasm [GO:0005654]	chromatin binding [GO:0003682]	NA	50
14	A0A024R101;Q86XZ4;F8VS10	Sa1-IAA	-0.254631	0.512479	-0.49686	3	0.653416	0.910148	NA	0.619048	0	A0A024R101	Spermatogenesis-associated serine-rich protein 2	SPATS2	NA	cytosol [GO:0005829]	NA	NA	19
15	A0A024R163;O95758;X6R242	Sa1-IAA	-0.0432355	0.434389	-0.0995317	1	0.936844	0.99121	NA	0.571429	0	A0A024R163	Polypyrimidine tract-binding protein 3	ROD1;PTBP3	mRNA processing [GO:0006397]; regulation of cell differentiation [GO:0045595]; RNA splicing [GO:0008380]	nucleus [GO:0005634]	RNA binding [GO:0003723]	NA	44
16	A0A024R169;Q9NXF1;B4DQR0;B7Z9D5;B4E149;A0A0A0MSR3	Sa1-IAA	-0.832555	0.663835	-1.25416	6	0.256431	0.761092	NA	0.619048	0	A0A024R169	Testis-expressed sequence 10 protein	TEX10	NA	NA	NA	NA	34
17	A0A024R179;Q09161;X6R941	Sa1-IAA	0.0908594	0.687349	0.132188	3	0.903203	0.984803	NA	0.571429	0	A0A024R179	Nuclear cap-binding protein subunit 1	NCBP1	7-methylguanosine mRNA capping [GO:0006370]; mRNA cis splicing, via spliceosome [GO:0045292]; mRNA transport [GO:0051028]; nuclear-transcribed mRNA catabolic process, nonsense-mediated decay [GO:0000184]	cytosol [GO:0005829]; mitochondrion [GO:0005739]; nuclear cap binding complex [GO:0005846]; nucleoplasm [GO:0005654]	RNA cap binding [GO:0000339]	NA	38
18	A0A024R1K8;Q15459;B4E091;H7C1L2	Sa1-IAA	-0.268022	0.151591	-1.76806	7	0.120378	0.649655	NA	0.483516	0	A0A024R1K8	Splicing factor 3A subunit 1	SF3A1	mRNA processing [GO:0006397]; RNA splicing [GO:0008380]	nuclear speck [GO:0016607]; spliceosomal complex [GO:0005681]	RNA binding [GO:0003723]	NA	135
19	A0A024R1N1;P35579;A0A0U4BW16;Q86XU5;B4E3S1;Q6ZNL4;A0A024QZJ6;A0A024QZJ4;P35749;Q99529;Q5BKV1;B1AH99;A0A494C024;Q9UMJ0;Q2PS10;A0A2R8Y4C3;Q66K75;A0A0C4DFM8;O14729;O14794;Q7Z7R0	Sa1-IAA	-0.668415	0.36661	-1.82324	7	0.111041	0.644175	NA	0.623377	0	A0A024R1N1	Myosin-9	MYH9	cell-cell adhesion [GO:0098609]; cell morphogenesis involved in differentiation [GO:0000904]; establishment of meiotic spindle localization [GO:0051295]; establishment of T cell polarity [GO:0001768]; in utero embryonic development [GO:0001701]; meiotic spindle organization [GO:0000212]; myoblast fusion [GO:0007520]; negative regulation of actin filament severing [GO:1903919]; phagocytosis, engul…	adherens junction [GO:0005912]; brush border [GO:0005903]; cortical cytoskeleton [GO:0030863]; focal adhesion [GO:0005925]; immunological synapse [GO:0001772]; myosin II complex [GO:0016460]; neuromuscular junction [GO:0031594]; spindle [GO:0005819]; stress fiber [GO:0001725]; uropod [GO:0001931]	actin filament binding [GO:0051015]; ATP binding [GO:0005524]; motor activity [GO:0003774]; protein domain specific binding [GO:0019904]	NA	203
20	A0A024R1N4;P12956;B2RDN9;B4DE32;B1AHC9;B4E356;Q6IC76	Sa1-IAA	0.132759	0.325956	0.407292	6	0.697926	0.926635	NA	0.545455	0	A0A024R1N4	X-ray repair cross-complementing protein 6	XRCC6;G22P1	brain development [GO:0007420]; cellular hyperosmotic salinity response [GO:0071475]; cellular response to X-ray [GO:0071481]; DNA recombination [GO:0006310]; double-strand break repair via nonhomologous end joining [GO:0006303]; telomere maintenance [GO:0000723]; viral process [GO:0016032]	cytoplasm [GO:0005737]; Ku70:Ku80 complex [GO:0043564]; nucleolus [GO:0005730]; nucleoplasm [GO:0005654]	ATP binding [GO:0005524]; damaged DNA binding [GO:0003684]; DNA helicase activity [GO:0003678]; double-stranded DNA binding [GO:0003690]; telomeric DNA binding [GO:0042162]	NA	176
21	A0A024R1U0;P46060;B0QYT6;B0QYT5;B0QYT4;H0Y4Q3;B4E0U0;B4DY16	Sa1-IAA	1.11251	0.925216	1.20244	2	0.35224	0.790424	NA	0.714286	0	A0A024R1U0	Ran GTPase-activating protein 1	RANGAP1	cellular response to vasopressin [GO:1904117]; response to axon injury [GO:0048678]; signal transduction [GO:0007165]	aggresome [GO:0016235]; axon cytoplasm [GO:1904115]; cytoplasmic periphery of the nuclear pore complex [GO:1990723]; cytosol [GO:0005829]; dendrite [GO:0030425]; intracellular membrane-bounded organelle [GO:0043231]; mitotic spindle [GO:0072686]; nuclear membrane [GO:0031965]; nuclear pore cytoplasmic filaments [GO:0044614]	GTPase activator activity [GO:0005096]; Ran GTPase binding [GO:0008536]; ubiquitin protein ligase binding [GO:0031625]	NA	92
22	A0A024R233;B7Z954;A0A3B3IRI3;A0A3B3ITE1;A0A1B0GTW1;A0A2R8YDH4;Q9UDY2;A0A3B3ISZ5;A0A3B3IS03;B7Z2R3;A0A024R225;A0A3B3IT83;A0A3B3IRV6;A0A3B3ISF1;A0A3B3IU51	Sa1-IAA	-0.179385	0.305252	-0.587661	4	0.588333	0.877134	NA	0.514286	0	A0A024R233	Tight junction protein ZO-2	TJP2	NA	bicellular tight junction [GO:0005923]; plasma membrane [GO:0005886]	NA	NA	32
23	A0A024R250;Q76FK4;Q6AI50;F5H101;A6H8Z4;B4DM91;F8WE42;F5GWN9;A0A0A0MSJ1	Sa1-IAA	-0.29238	0.254612	-1.14834	5	0.302784	0.783886	NA	0.619048	0	A0A024R250	Nucleolar protein 8	NOL8;DKFZp686P12242	NA	nucleolus [GO:0005730]	RNA binding [GO:0003723]	NA	24
24	A0A024R2G2;Q9BXW9;H7BZJ7;F8WE37	Sa1-IAA	-0.185374	0.446509	-0.415163	7	0.690452	0.926349	NA	0.571429	0	A0A024R2G2	Fanconi anemia group D2 protein	FANCD2	NA	NA	NA	NA	22
25	A0A024R2N6;P30414;A0A087WYW3;Q6M1B8;Q6N014;Q6MZH6;Q59EC3	Sa1-IAA	-0.865269	0.533295	-1.6225	4	0.180017	0.720776	NA	0.591837	0	A0A024R2N6	NK-tumor recognition protein;Putative peptidyl-prolyl cis-trans isomerase	NKTR;DKFZp686J06106;DKFZp686N24126	NA	NA	NA	NA	10
26	A0A024R2U6;P52756;Q59HE6;A0A0S2Z549;C9JFQ5;E1CJT4;A0A0S2Z5U0;C9J9P7	Sa1-IAA	0.442475	0.585796	0.75534	2	0.528881	0.868378	NA	0.642857	0	A0A024R2U6	RNA-binding protein 5	RBM5	mRNA processing [GO:0006397]; regulation of alternative mRNA splicing, via spliceosome [GO:0000381]; regulation of apoptotic process [GO:0042981]; RNA splicing [GO:0008380]	nucleoplasm [GO:0005654]; spliceosomal complex [GO:0005681]	metal ion binding [GO:0046872]; RNA binding [GO:0003723]	NA	45
27	A0A024R2V0;B5MEG9;Q86Y04;E7EVA0;P27816;H7C4C5;H0Y2V1;F8W9U4;B4DSQ1;B4DM10	Sa1-IAA	-0.612419	0.267129	-2.2926	6	0.0617239	0.618718	NA	0.428571	0	A0A024R2V0	Microtubule-associated protein;Microtubule-associated protein 4	MAP4	NA	cytoplasm [GO:0005737]; microtubule [GO:0005874]	microtubule binding [GO:0008017]	NA	86
28	A0A024R321;O75369;Q68CT4;E7EN95;H7C5L4;A0A0A0MT44	Sa1-IAA	-0.920238	0.717925	-1.2818	6	0.247213	0.761092	NA	0.607143	0	A0A024R321	Filamin-B	FLNB;DKFZp686A1668	actin cytoskeleton organization [GO:0030036]; cell differentiation [GO:0030154]	NA	actin binding [GO:0003779]	NA	171
29	A0A024R326;Q6IPI1;A0A3B3ITT5;P47914	Sa1-IAA	-0.915218	0.431012	-2.12342	7	0.0713606	0.618718	NA	0	0	A0A024R326	60S ribosomal protein L29	RPL29	translation [GO:0006412]	ribosome [GO:0005840]	structural constituent of ribosome [GO:0003735]	NA	169
30	A0A024R377;Q6IQ32;H0YM09	Sa1-IAA	0.387255	0.760944	0.508915	3	0.645879	0.90538	NA	0.428571	0	A0A024R377	ADNP homeobox protein 2	KIAA0863;ADNP2	cellular response to oxidative stress [GO:0034599]; cellular response to retinoic acid [GO:0071300]; negative regulation of cell death [GO:0060548]; neuron differentiation [GO:0030182]; positive regulation of cell growth [GO:0030307]	nucleus [GO:0005634]	DNA binding [GO:0003677]	NA	2
31	A0A024R3A8;Q9BRL6	Sa1-IAA	-0.289706	0.55451	-0.522454	3	0.637482	0.902731	NA	0.571429	0	A0A024R3A8	Serine/arginine-rich splicing factor 8	SRP46;SRSF8	NA	cytosol [GO:0005829]; nuclear speck [GO:0016607]; nucleoplasm [GO:0005654]	RNA binding [GO:0003723]	NA	0
32	A0A024R3D4;Q8ND24;E9PN76	Sa1-IAA	-0.577016	0.491879	-1.17308	1	0.449401	0.831228	NA	0.714286	0	A0A024R3D4	RING finger protein 214	DKFZp547C195;RNF214	NA	NA	metal ion binding [GO:0046872]	NA	2
33	A0A024R3J7;P46977;A0A0C4DH80;E9PN73;E9PI32;H0YET6	Sa1-IAA	0.374895	0.438874	0.85422	7	0.421252	0.822367	NA	0.510204	0	A0A024R3J7	Dolichyl-diphosphooligosaccharide--protein glycosyltransferase subunit STT3A	hCG_2032701;STT3A	protein glycosylation [GO:0006486]	integral component of membrane [GO:0016021]	dolichyl-diphosphooligosaccharide-protein glycotransferase activity [GO:0004579]; metal ion binding [GO:0046872]	NA	23
34	A0A024R3K9;A0A024R3N2;Q6P4R8;E9PJU3;E9PJG2;E9PQ59;B4DSL1	Sa1-IAA	-0.349463	0.828029	-0.422042	0	NA	NA	NA	0.714286	0	A0A024R3K9	Nuclear factor related to kappa-B-binding protein	NFRKB	NA	Ino80 complex [GO:0031011]; nucleoplasm [GO:0005654]	NA	NA	15
35	A0A024R3R5;Q14739;A0A494C1L1;C9JXK0;B4E0Z3;C9JES9	Sa1-IAA	-0.407438	1.74068	-0.234068	5	0.824214	0.964066	NA	0.607143	0	A0A024R3R5	Lamin-B receptor	LBR	cholesterol biosynthetic process [GO:0006695]	endoplasmic reticulum membrane [GO:0005789]; integral component of membrane [GO:0016021]; nuclear inner membrane [GO:0005637]	delta14-sterol reductase activity [GO:0050613]; DNA binding [GO:0003677]	NA	54
36	A0A024R3V0;Q9NUQ6;B8ZZZ7;F8W6C2;C9JKE4;F8VZ02;F8VT91;C9JGM8;F2Z2S1;C9JW67;Q4ZFW0;F8WAV0;C9IZC3;C9J8M7	Sa1-IAA	-0.623282	0.68479	-0.910179	6	0.397817	0.817982	NA	0.632653	0	A0A024R3V0	SPATS2-like protein	DNAPTP6;SPATS2L	NA	cytosol [GO:0005829]; nucleolus [GO:0005730]; nucleoplasm [GO:0005654]	NA	NA	20
37	A0A024R473;Q9H9J2	Sa1-IAA	0.129061	NA	NA	0	NA	NA	NA	0.714286	0	A0A024R473	39S ribosomal protein L44, mitochondrial	MRPL44	NA	NA	NA	NA	10
38	A0A024R4A5;I1E4Y6;Q6Y7W6;E7ESB6;C9JHW1;B4DRT8;B4DZM1;C9JW88;F8WCD5;C9JPV7;C9JXQ0;C9J0V6;C9JHT0;C9JRZ2;B4DLU7;C9JH18	Sa1-IAA	-0.426072	0.697502	-0.610854	3	0.584465	0.877134	NA	0.642857	0	A0A024R4A5	PERQ amino acid-rich with GYF domain-containing protein 2	TNRC15;GIGYF2	NA	NA	NA	NA	45
39	A0A024R4M0;P46781;A5D904;B5MCT8;C9JM19;B7Z732;F2Z3C0;A8MXK4	Sa1-IAA	1.67877	0.445216	3.77068	4	0.019593	0.500978	NA	0.657143	0	A0A024R4M0	40S ribosomal protein S9	RPS9	translation [GO:0006412]	small ribosomal subunit [GO:0015935]; synapse [GO:0045202]	rRNA binding [GO:0019843]; structural constituent of ribosome [GO:0003735]	NA	170
40	A0A024R4W4;A0A024R4V5;O95696;Q86X06;B7Z926;Q9Y4Q3;B4DZ41;B4E3L9;B4DZC2;Q59G93;J3KQ61;Q5CZ83;Q659H0;A8WI62;A8WI61;H0Y7B4;Q8N4T7;F6XDC4;E9PSF3	Sa1-IAA	-0.420736	0.821154	-0.512371	7	0.624157	0.893695	NA	0.571429	0	A0A024R4W4	Bromodomain-containing protein 1	BRD1;DKFZp434B094	NA	nuclear speck [GO:0016607]	metal ion binding [GO:0046872]	NA	5
41	A0A024R4Z3;Q96PZ2;E9PNQ0;E9PR18	Sa1-IAA	-0.929689	0.216492	-4.29433	1	0.145651	0.6651	NA	0.428571	0	A0A024R4Z3	Protein FAM111A	FAM111A	NA	fibrillar center [GO:0001650]; nucleoplasm [GO:0005654]	NA	NA	2
42	A0A024R4Z6;Q08945;E9PMD4	Sa1-IAA	-1.02038	0.347738	-2.93434	7	0.0218888	0.500978	NA	0	0	A0A024R4Z6	FACT complex subunit SSRP1	SSRP1	DNA repair [GO:0006281]; DNA replication [GO:0006260]	chromosome [GO:0005694]; nucleus [GO:0005634]	chromatin binding [GO:0003682]; DNA binding [GO:0003677]	NA	73
43	A0A024R534;O94776	Sa1-IAA	-0.0663018	0.55261	-0.119979	5	0.909171	0.984803	NA	0.539683	0	A0A024R534	Metastasis-associated protein MTA2	MTA2	DNA methylation [GO:0006306]; negative regulation of transcription by RNA polymerase II [GO:0000122]; positive regulation of transcription by RNA polymerase II [GO:0045944]; regulation of fibroblast migration [GO:0010762]	nucleoplasm [GO:0005654]; NuRD complex [GO:0016581]	chromatin binding [GO:0003682]; histone deacetylase activity [GO:0004407]; histone deacetylase binding [GO:0042826]; sequence-specific DNA binding [GO:0043565]; transcription coregulator activity [GO:0003712]; zinc ion binding [GO:0008270]	NA	66
44	A0A024R542;Q9C0C2;B3KXS7;A0A2R8Y5C4;E9PKK0;E9PKE7;Q86TK2	Sa1-IAA	Inf	NA	NA	NA	NA	0	oneConditionMissing	0.693878	0	A0A024R542	182 kDa tankyrase-1-binding protein	TNKS1BP1	NA	NA	NA	NA	25
45	A0A024R582;J3KMZ8;Q92785;E9PN04	Sa1-IAA	Inf	NA	NA	NA	NA	0	oneConditionMissing	0.714286	0	A0A024R582	Zinc finger protein ubi-d4	DPF2	NA	centrosome [GO:0005813]; cytosol [GO:0005829]; intracellular membrane-bounded organelle [GO:0043231]; nucleoplasm [GO:0005654]	metal ion binding [GO:0046872]	NA	7
46	A0A024R588;A0A024R566;B4DJU4;A0A024R5D9;A0A024R572;Q15637;B4DSE4;Q14820;F8WEV5;C9J792;B4DX42	Sa1-IAA	-1.57439	0.561955	-2.80163	1	0.218258	0.737887	NA	0.785714	0	A0A024R588	Splicing factor 1	SF1	mRNA splicing, via spliceosome [GO:0000398]	nucleoplasm [GO:0005654]	pre-mRNA branch point binding [GO:0045131]; zinc ion binding [GO:0008270]	NA	81
47	A0A024R5M9;A0A087WY61;Q59HB8;A0A024R5G4;Q7Z757;Q96HN5;H0YFY6;F5H4J1;A8K394;Q3SYK8;F5H6Y5;K4DIE0;Q9UNL7;Q9UPG3;F5H763;Q86XH4;F5H0Z7;F5GZW1;G1UI36;F5H2F3;F5H3L6;F5H1L0;F5H7R5;F5H4Y4;F5GWA2;F5GWK2;F5H073;F5H068;F8W6T3	Sa1-IAA	-2.23209	1.66673	-1.3392	0	NA	NA	NA	0.571429	0	A0A024R5M9	NA	NUMA1	NA	cytosol [GO:0005829]; Golgi membrane [GO:0000139]; nucleoplasm [GO:0005654]	NA	NA	78
48	A0A024R5Q8;Q05D32;H0YMH7;H0YNU2;H0YNW9	Sa1-IAA	0.805368	1.53843	0.5235	1	0.692977	0.926579	NA	0.857143	0	A0A024R5Q8	CTD small phosphatase-like protein 2	CTDSPL2	negative regulation of BMP signaling pathway [GO:0030514]; positive regulation of protein export from nucleus [GO:0046827]	nucleoplasm [GO:0005654]	phosphoprotein phosphatase activity [GO:0004721]	NA	4
49	A0A024R5X7;O76031;Q9H072;H0YM48;H0YK07	Sa1-IAA	-0.180191	0.626604	-0.287568	5	0.785215	0.95116	NA	0.603175	0	A0A024R5X7	ATP-dependent Clp protease ATP-binding subunit clpX-like, mitochondrial	CLPX;DKFZp586J151	protein folding [GO:0006457]	cytosol [GO:0005829]; mitochondrion [GO:0005739]; nucleoplasm [GO:0005654]	ATPase activity [GO:0016887]; ATP binding [GO:0005524]; unfolded protein binding [GO:0051082]	NA	23
50	A0A024R663;Q86UP2;G3V4Y7;B3KWP6;B7Z6P3;H0YJP2;B3KP76;H0YJV5;G3V5P0;G8JLP4;Q9Y4F3	Sa1-IAA	-0.321986	0.29172	-1.10375	5	0.319968	0.783886	NA	0.571429	0	A0A024R663	Kinectin	KTN1	microtubule-based movement [GO:0007018]; protein transport [GO:0015031]	endoplasmic reticulum [GO:0005783]; integral component of endoplasmic reticulum membrane [GO:0030176]	kinesin binding [GO:0019894]	NA	39
51	A0A024R6D8;Q13243;Q59EK7;B4DJK0;B4DUA4;G3V5K8;B5BUD8;Q86U32	Sa1-IAA	-0.742691	0.788896	-0.941432	4	0.399788	0.817982	NA	0.428571	0	A0A024R6D8	Serine/arginine-rich splicing factor 5	SFRS5;SRSF5	cellular response to insulin stimulus [GO:0032869]; liver regeneration [GO:0097421]; mRNA processing [GO:0006397]; positive regulation of RNA splicing [GO:0033120]; regulation of cell cycle [GO:0051726]; RNA splicing [GO:0008380]	cytosol [GO:0005829]; nucleolus [GO:0005730]; nucleoplasm [GO:0005654]	protein kinase B binding [GO:0043422]; RNA binding [GO:0003723]	NA	112
52	A0A024R6Q8;Q9NPI1;I3L4V5	Sa1-IAA	-1.55004	0.638181	-2.42883	7	0.0454984	0.611234	NA	0.428571	0	A0A024R6Q8	Bromodomain-containing protein 7	BRD7	NA	NA	NA	NA	17
53	A0A024R704;P78362;H7C5L6	Sa1-IAA	-0.89271	0.498504	-1.79078	5	0.133332	0.658061	NA	0.642857	0	A0A024R704	SRSF protein kinase 2;SRSF protein kinase 2 N-terminal;SRSF protein kinase 2 C-terminal	SRPK2	NA	cytosol [GO:0005829]; nucleolus [GO:0005730]; nucleoplasm [GO:0005654]	ATP binding [GO:0005524]; protein kinase activity [GO:0004672]	NA	38
54	A0A024R711;O00308;B4DIN7;H3BPJ8;H3BRX8;H3BS79;B4DHF6	Sa1-IAA	0.48295	0.763329	0.632689	6	0.550273	0.868716	NA	0.285714	0	A0A024R711	E3 ubiquitin-protein ligase;NEDD4-like E3 ubiquitin-protein ligase WWP2	WWP2	negative regulation of DNA-binding transcription factor activity [GO:0043433]; negative regulation of transcription by RNA polymerase II [GO:0000122]; positive regulation of transcription by RNA polymerase II [GO:0045944]; proteasome-mediated ubiquitin-dependent protein catabolic process [GO:0043161]; protein K63-linked ubiquitination [GO:0070534]	cytoplasm [GO:0005737]; nucleus [GO:0005634]	RNA polymerase II transcription factor binding [GO:0001085]; ubiquitin protein ligase activity [GO:0061630]	A0A024R711;O00308;B4DIN7;H3BPJ8;H3BRX8;H3BS79;B4DHF6	3
55	A0A024R753;Q9NW13;B4DJ90;C9JAA9;H7C5G8;C9JE21;A0A0S2Z5E5	Sa1-IAA	-0.184926	0.725869	-0.254765	7	0.806227	0.959392	NA	0.605442	0	A0A024R753	RNA-binding protein 28	RBM28	NA	nucleolus [GO:0005730]	RNA binding [GO:0003723]	NA	54
56	A0A024R784;O15164;B4DYZ9;Q6ZSA6	Sa1-IAA	-0.294314	0.360376	-0.816688	6	0.445314	0.828125	NA	0.6	0	A0A024R784	Transcription intermediary factor 1-alpha	TRIM24	NA	nucleoplasm [GO:0005654]	zinc ion binding [GO:0008270]	NA	15
57	A0A024R7C7;Q12906;F4ZW64;A8K590;F4ZW65;B4DFG4;Q59GP7;B4DDF3;K7EKJ9;K7ER69;K7EM82;K7EJ09;K7EQR9;K7ERM6;K7ENK6;K7ELV3;K7EKY0;K7EPG3;K7EQ75	Sa1-IAA	0.34243	0.443384	0.77231	0	NA	NA	NA	0.714286	0	A0A024R7C7	Interleukin enhancer-binding factor 3	ILF3	defense response to virus [GO:0051607]	mitochondrion [GO:0005739]; nucleolus [GO:0005730]; nucleoplasm [GO:0005654]	DNA binding [GO:0003677]; double-stranded RNA binding [GO:0003725]	NA	158
58	A0A024R7G7;Q96K37	Sa1-IAA	-0.987111	0.629392	-1.56836	5	0.177586	0.717917	NA	0.47619	0	A0A024R7G7	Solute carrier family 35 member E1	SLC35E1	NA	Golgi apparatus [GO:0005794]; integral component of membrane [GO:0016021]	NA	NA	4
59	A0A024R7K7;A0A024R7M6;Q86YP4;B4DKZ7;C9JGN4;C9JHD7;C9JJK9;C9JVY3;V9GY85;H7C3H1;C9JMI3;V9GYX5;B4E0Q6	Sa1-IAA	-0.0350563	0.62215	-0.0563471	6	0.956895	0.996403	NA	0.642857	0	A0A024R7K7	Transcriptional repressor p66-alpha	GATAD2A	negative regulation of transcription by RNA polymerase II [GO:0000122]	nucleoplasm [GO:0005654]	sequence-specific DNA binding [GO:0043565]; zinc ion binding [GO:0008270]	NA	51
60	A0A024R7L5;A0A024R7L8;Q92900;B3KY55;A0A059XBJ1;A0A059XAJ5;A0A059XAL2;A0A059XG67;A0A059X4U2;Q6ZUC8;A0A059XG73;A0A059XBJ6;A0A059XAM1;A0A059XAL6	Sa1-IAA	-0.264682	0.341567	-0.774903	6	0.467826	0.838806	NA	0.691729	0	A0A024R7L5	Regulator of nonsense transcripts 1	UPF1	nuclear-transcribed mRNA catabolic process, nonsense-mediated decay [GO:0000184]	cytoplasm [GO:0005737]; nucleoplasm [GO:0005654]	ATP binding [GO:0005524]; DNA binding [GO:0003677]; helicase activity [GO:0004386]; zinc ion binding [GO:0008270]	NA	35
61	A0A024R7N2;Q9HD20;A0A024R7P3;Q6ZUA1;Q8N3E5;Q8NC73;H7C3H2;Q8TEG5	Sa1-IAA	Inf	NA	NA	NA	NA	0	oneConditionMissing	0.714286	0	A0A024R7N2	Manganese-transporting ATPase 13A1	ATP13A1	cation transport [GO:0006812]	integral component of membrane [GO:0016021]	ATPase activity [GO:0016887]; ATP binding [GO:0005524]; metal ion binding [GO:0046872]	NA	23
62	A0A024R7T3;P52597;B4DKS8;A0A1B0GW42	Sa1-IAA	-0.47742	0.477146	-1.00057	7	0.350358	0.790424	NA	0.365079	0	A0A024R7T3	Heterogeneous nuclear ribonucleoprotein F;Heterogeneous nuclear ribonucleoprotein F, N-terminally processed	HNRPF;HNRNPF	NA	cytosol [GO:0005829]; nucleoplasm [GO:0005654]; viral nucleocapsid [GO:0019013]	RNA binding [GO:0003723]; TBP-class protein binding [GO:0017025]	NA	243
63	A0A024R7V7;Q9P2D1;B4DIS0;B4DLD8;Q6ZWF9;Q5JB41;A0A087WU44	Sa1-IAA	-1.15903	0.722945	-1.60321	6	0.160009	0.689323	NA	0.52381	0	A0A024R7V7	Chromodomain-helicase-DNA-binding protein 7	CHD7	chromatin organization [GO:0006325]	NA	ATP binding [GO:0005524]; DNA helicase activity [GO:0003678]	NA	26
64	A0A024R856;H9KVB4;O15417;H7C177;H7C3U5;A3KMH2;H7BXS9	Sa1-IAA	-1.08454	0.389149	-2.78694	3	0.068593	0.618718	NA	0.571429	0	A0A024R856	Trinucleotide repeat-containing gene 18 protein	hCG_96198;TNRC18	NA	NA	chromatin binding [GO:0003682]	NA	2
65	A0A024R8A7;Q96I24;A0A494C1K6;B4DV73;Q59FU3;B4E0X8;B4DWL1;A0A1Z1G4M2;A0A384MDX9;E9PEB5;B4DT31;Q96AE4	Sa1-IAA	-1.0939	0.354273	-3.08774	7	0.0176228	0.500978	NA	0.571429	0	A0A024R8A7	Far upstream element-binding protein 3	hCG_31253;FUBP3	NA	NA	RNA binding [GO:0003723]	NA	63
66	A0A024R8S3;A8MUA9;A8MU27;Q6EEV6;P61956;P55854	Sa1-IAA	#NAME?	NA	NA	NA	NA	0	oneConditionMissing	0.857143	0	A0A024R8S3	Small ubiquitin-related modifier;Small ubiquitin-related modifier 4;Small ubiquitin-related modifier 2;Small ubiquitin-related modifier 3	SUMO2;SUMO3;SUMO4	NA	nucleus [GO:0005634]	NA	NA	81
67	A0A024R8V6;Q9P275;A0A075B784;B3KMW2;Q9H9C5;E9PEW0;K7ELR5;Q8IXW9;K7ERC1;K7ELT3;K7EQS0;K7EPT1;K7EMM6;K7EJI3;K7EIH0	Sa1-IAA	-0.941185	0.636222	-1.47934	5	0.199116	0.731578	NA	0.595238	0	A0A024R8V6	Ubiquitin carboxyl-terminal hydrolase;Ubiquitin carboxyl-terminal hydrolase 36	USP36	nucleolus organization [GO:0007000]; protein deubiquitination [GO:0016579]; protein stabilization [GO:0050821]; regulation of rRNA processing [GO:2000232]; ubiquitin-dependent protein catabolic process [GO:0006511]	nuclear speck [GO:0016607]; nucleolus [GO:0005730]; nucleoplasm [GO:0005654]	thiol-dependent ubiquitinyl hydrolase activity [GO:0036459]	NA	26
68	A0A024R8W0;P38919;I3L3H2;Q59GT8;J3QL52;Q5JWW0;J3QQP0;E9PBH4;F8WE11	Sa1-IAA	-0.146371	0.420881	-0.347772	7	0.738234	0.941025	NA	0.417582	0	A0A024R8W0	Eukaryotic initiation factor 4A-III;Eukaryotic initiation factor 4A-III, N-terminally processed	DDX48;EIF4A3	associative learning [GO:0008306]; cellular response to brain-derived neurotrophic factor stimulus [GO:1990416]; cellular response to selenite ion [GO:0072715]; exploration behavior [GO:0035640]; negative regulation of excitatory postsynaptic potential [GO:0090394]; negative regulation of selenocysteine incorporation [GO:1904570]; negative regulation of selenocysteine insertion sequence binding […	dendrite [GO:0030425]; neuronal cell body [GO:0043025]; nucleoplasm [GO:0005654]; postsynaptic cytosol [GO:0099524]; ribonucleoprotein complex [GO:1990904]	ATP binding [GO:0005524]; ribonucleoprotein complex binding [GO:0043021]; RNA helicase activity [GO:0003724]; RNA stem-loop binding [GO:0035613]; selenocysteine insertion sequence binding [GO:0035368]	NA	147
69	A0A024R911;Q9UBH6	Sa1-IAA	Inf	NA	NA	NA	NA	0	oneConditionMissing	0.857143	0	A0A024R911	Xenotropic and polytropic retrovirus receptor 1	XPR1	response to virus [GO:0009615]	integral component of membrane [GO:0016021]	virus receptor activity [GO:0001618]	NA	3
70	A0A024R914;Q5VT06;H0YD38;H0Y6Q4;Q05D72;Q7LGH1;H0Y7F7	Sa1-IAA	-0.476324	1.15772	-0.411434	0	NA	NA	NA	0.571429	0	A0A024R914	Centrosome-associated protein 350	CEP350	microtubule anchoring [GO:0034453]	centrosome [GO:0005813]	microtubule binding [GO:0008017]	NA	5
71	A0A024R952;Q13835;Q14BN3;B4DRX5	Sa1-IAA	-0.723348	1.48947	-0.48564	1	0.712188	0.931043	NA	0.428571	0	A0A024R952	Plakophilin-1	PKP1	cell-cell adhesion [GO:0098609]	desmosome [GO:0030057]; nucleoplasm [GO:0005654]; plasma membrane [GO:0005886]	NA	A0A024R952;Q13835;Q14BN3;B4DRX5	34
72	A0A024R9D2;Q86UE4;E5RJU9;H0YB56;H0YBJ8	Sa1-IAA	-0.484177	0.425431	-1.13809	5	0.306662	0.783886	NA	0.642857	0	A0A024R9D2	Protein LYRIC	MTDH	bicellular tight junction assembly [GO:0070830]; negative regulation of apoptotic process [GO:0043066]; positive regulation of angiogenesis [GO:0045766]; positive regulation of I-kappaB kinase/NF-kappaB signaling [GO:0043123]	apical plasma membrane [GO:0016324]; bicellular tight junction [GO:0005923]; endoplasmic reticulum [GO:0005783]; endoplasmic reticulum membrane [GO:0005789]; fibrillar center [GO:0001650]; integral component of membrane [GO:0016021]; intercellular canaliculus [GO:0046581]; perinuclear region of cytoplasm [GO:0048471]	NA	NA	50
73	A0A024R9G7;Q6PL18;A0A0B4J211	Sa1-IAA	-0.552434	0.318692	-1.73344	7	0.126614	0.658061	NA	0.583333	0	A0A024R9G7	ATPase family AAA domain-containing protein 2	ATAD2	chromatin organization [GO:0006325]; regulation of transcription, DNA-templated [GO:0006355]	nucleoplasm [GO:0005654]	ATPase activity [GO:0016887]; ATP binding [GO:0005524]	NA	18
74	A0A024R9J0;O60216;E5RFV8;E5RIN7;E5RFZ5;B3KUT8;E5RI01;E5RJW1;E5RJK5;E5RG18;F6KSS9;Q9H4I0;A0A140T8W2	Sa1-IAA	Inf	NA	NA	NA	NA	0	oneConditionMissing	0.585034	0	A0A024R9J0	Double-strand-break repair protein rad21 homolog	RAD21	negative regulation of G2/M transition of mitotic cell cycle [GO:0010972]; negative regulation of mitotic metaphase/anaphase transition [GO:0045841]; sister chromatid cohesion [GO:0007062]	chromatin [GO:0000785]; chromosome, centromeric region [GO:0000775]; cohesin complex [GO:0008278]; condensed nuclear chromosome [GO:0000794]; nucleoplasm [GO:0005654]	NA	NA	39
75	A0A024R9L1;O60306;B0AZM4;A8K6F0;H0YH15;H0YLN9	Sa1-IAA	-0.536397	0.301528	-1.77893	6	0.125563	0.658061	NA	0.507937	0	A0A024R9L1	Intron-binding protein aquarius	AQR	mRNA splicing, via spliceosome [GO:0000398]	catalytic step 2 spliceosome [GO:0071013]; nucleoplasm [GO:0005654]	RNA binding [GO:0003723]	NA	24
76	A0A024R9P6;Q96TC7;H0YNE5;H0YLG5;H0YMB1;B3KUI4	Sa1-IAA	0.68084	NA	NA	0	NA	NA	NA	0.714286	0	A0A024R9P6	Regulator of microtubule dynamics protein 3	FAM82C;RMDN3	NA	integral component of membrane [GO:0016021]; intercellular bridge [GO:0045171]; mitochondrion [GO:0005739]	NA	NA	1
77	A0A024R9R7;Q9ULG1;A8K2V6;H0YMN5;Q9NUK2;Q6N074;A0A087X0U7	Sa1-IAA	-0.523033	0.138815	-3.76783	5	0.0130519	0.475711	NA	0.657143	0	A0A024R9R7	DNA helicase INO80	INOC1;INO80	chromatin remodeling [GO:0006338]; DNA repair [GO:0006281]; transcription, DNA-templated [GO:0006351]	Ino80 complex [GO:0031011]; nuclear body [GO:0016604]; nucleoplasm [GO:0005654]; plasma membrane [GO:0005886]	ATPase activity [GO:0016887]; ATP binding [GO:0005524]; DNA binding [GO:0003677]	NA	2
78	A0A024RAC0;Q86V48;E5RFK8;Q05DE3;E5RHU7;B4DML1;Q12882	Sa1-IAA	0.19934	0.444645	0.448312	6	0.669662	0.912563	NA	0.642857	0	A0A024RAC0	Leucine zipper protein 1	LUZP1	NA	NA	NA	NA	33
79	A0A024RAH8;Q9NVP1;Q4ZG72;Q8N254;H7C452;Q59FR7;Q53TI6	Sa1-IAA	-0.587214	0.597054	-0.983519	7	0.358117	0.790424	NA	0.528571	0	A0A024RAH8	ATP-dependent RNA helicase DDX18	DDX18	NA	NA	NA	NA	66
80	A0A024RAS3;Q9H0S4;Q53GJ1;Q9H4E3;A4UCU0;B4DYP6;F5H1N9;Q7Z4B1	Sa1-IAA	-0.521311	0.470873	-1.10712	6	0.310644	0.783886	NA	0.535714	0	A0A024RAS3	Probable ATP-dependent RNA helicase DDX47	hCG_27698;DDX47;E4-DBP	NA	nucleolus [GO:0005730]	ATP binding [GO:0005524]; nucleic acid binding [GO:0003676]; RNA helicase activity [GO:0003724]	NA	45
81	A0A024RAV4;A0A024RAQ1;P16989;Q96GD7;Q59EB5;A0A0D9SEI8	Sa1-IAA	-1.24459	1.33497	-0.932295	1	0.522297	0.866046	NA	0.857143	0	A0A024RAV4	Y-box-binding protein 3	CSDA;YBX3	NA	NA	nucleic acid binding [GO:0003676]	NA	179
82	A0A024RAY2;P05783;B2RA03;F8VZY9;I6L965;CON__H-INV:HIT000015463	Sa1-IAA	-0.226018	0.311339	-0.725957	7	0.491418	0.851848	NA	0.37931	0	A0A024RAY2	Keratin, type I cytoskeletal 18	KRT18	extrinsic apoptotic signaling pathway [GO:0097191]; hepatocyte apoptotic process [GO:0097284]; tumor necrosis factor-mediated signaling pathway [GO:0033209]	cell periphery [GO:0071944]; cytosol [GO:0005829]; keratin filament [GO:0045095]	structural molecule activity [GO:0005198]	NA	238
83	A0A024RBB8;Q5HYM3;Q9BZF1;F8VUA7;F8VQX7;Q641R2;Q96N80;Q96E43;F8VVD3;F8VVE7;Q6ZME5;F8VZ43	Sa1-IAA	-0.23474	0.615818	-0.381184	1	0.768155	0.945699	NA	0.642857	0	A0A024RBB8	Oxysterol-binding protein;Oxysterol-binding protein-related protein 8	OSBPL8;DKFZp686C0249	activation of protein kinase B activity [GO:0032148]; lipid transport [GO:0006869]; negative regulation of cell migration [GO:0030336]; positive regulation of glucose import [GO:0046326]; positive regulation of insulin receptor signaling pathway [GO:0046628]; positive regulation of protein kinase B signaling [GO:0051897]; protein localization to nuclear pore [GO:0090204]	integral component of membrane [GO:0016021]; nuclear membrane [GO:0031965]	lipid binding [GO:0008289]	NA	26
84	A0A024RBB9;Q9Y2U8;B4E2K7	Sa1-IAA	-0.331506	0.561788	-0.590091	1	0.660617	0.912563	NA	0.571429	0	A0A024RBB9	Inner nuclear membrane protein Man1	LEMD3	nucleus organization [GO:0006997]; regulation of intracellular signal transduction [GO:1902531]	integral component of membrane [GO:0016021]; nuclear inner membrane [GO:0005637]; nuclear membrane [GO:0031965]	nucleic acid binding [GO:0003676]	NA	12
85	A0A024RBE7;P42167;G5E972;A0A024RBH7;Q59G12;H0YJH7;Q9P1N8	Sa1-IAA	0.0696361	1.17331	0.0593502	7	0.954332	0.996403	NA	0.5	0	A0A024RBE7	Lamina-associated polypeptide 2, isoforms beta/gamma;Thymopoietin;Thymopentin	TMPO	NA	integral component of membrane [GO:0016021]; nuclear membrane [GO:0031965]	DNA binding [GO:0003677]	NA	127
86	A0A024RC19;Q5FWF5	Sa1-IAA	Inf	NA	NA	NA	NA	0	oneConditionMissing	0.857143	0	A0A024RC19	N-acetyltransferase ESCO1	ESCO1	post-translational protein acetylation [GO:0034421]; regulation of DNA replication [GO:0006275]; sister chromatid cohesion [GO:0007062]	chromatin [GO:0000785]; nucleus [GO:0005634]	metal ion binding [GO:0046872]; transferase activity, transferring acyl groups [GO:0016746]	NA	0
87	A0A024RC75;O14647;A0A1B0GTU9;A8K9Y5;A0A0D9SGK0;B7Z3I4;Q6AI05;A0A1B0GTM9;Q8N677;A0A0D9SF92;A0A0D9SFI3	Sa1-IAA	-0.865126	0.49088	-1.7624	3	0.17621	0.717917	NA	0.642857	0	A0A024RC75	Chromodomain-helicase-DNA-binding protein 2	CHD2	chromatin organization [GO:0006325]	intracellular membrane-bounded organelle [GO:0043231]; nucleoplasm [GO:0005654]	ATP binding [GO:0005524]; DNA helicase activity [GO:0003678]	NA	27
88	A0A024RCU9;H3BLV9;Q96SB4;A8K8B2;D6RBF8;H7C2I2;D6RBM8;H7C521;A8MPP7;A8MPY5;E7ETV6;Q59GF4;Q9UPE1	Sa1-IAA	-0.224623	0.433142	-0.51859	6	0.622609	0.893695	NA	0.628571	0	A0A024RCU9	SRSF protein kinase 1	SRPK1	NA	NA	ATP binding [GO:0005524]; protein kinase activity [GO:0004672]	NA	52
89	A0A024RCZ1;Q8NC56;A0A220T1R7;D6RBV0;H7C2Z0;H0Y9B7	Sa1-IAA	0.097176	0.159895	0.60775	1	0.652343	0.910148	NA	0.571429	0	A0A024RCZ1	LEM domain-containing protein 2	LEMD2	heart formation [GO:0060914]; negative regulation of MAPK cascade [GO:0043409]; negative regulation of protein kinase B signaling [GO:0051898]; neurogenesis [GO:0022008]; nuclear envelope organization [GO:0006998]; skeletal muscle cell differentiation [GO:0035914]	integral component of membrane [GO:0016021]; nuclear inner membrane [GO:0005637]; nuclear membrane [GO:0031965]	NA	NA	5
90	A0A024RDH8;P49207;Q5MK14	Sa1-IAA	-0.627991	0.672148	-0.934304	6	0.386205	0.812707	NA	0.52381	0	A0A024RDH8	60S ribosomal protein L34	RPL34	NA	NA	NA	NA	84
91	A0A024RDK4;Q96CB8;A0A087WXN4;E9PGI3;A0A1B0GX90;C9JDP3;C9J0M6	Sa1-IAA	-0.25716	0.548069	-0.469211	4	0.663352	0.912563	NA	0.571429	0	A0A024RDK4	Integrator complex subunit 12	INTS12	snRNA processing [GO:0016180]	nucleus [GO:0005634]	metal ion binding [GO:0046872]	NA	14
92	A0A024RDU0;Q9UL03;B3KQH5;B4E2C8;G5E9X1;B4DL13;C9J885;C9K0V7;F8WAV7;B4E1J5;C9JXP6;C9JVX2;B9EIK3;A0A1W2PPI5;Q5JSJ4;Q8N8M2	Sa1-IAA	0.368179	0.676457	0.544276	2	0.640821	0.903797	NA	0.571429	0	A0A024RDU0	Integrator complex subunit 6	INTS6	NA	actin cytoskeleton [GO:0015629]; nucleoplasm [GO:0005654]	NA	NA	1
93	A0A024RDV5;A0A024RDT9;Q9Y2H6;G5E9X3	Sa1-IAA	-0.283751	0.387952	-0.731409	2	0.540617	0.868716	NA	0.5	0	A0A024RDV5	Fibronectin type-III domain-containing protein 3A	FNDC3A	NA	integral component of membrane [GO:0016021]	NA	NA	4
94	A0A024RDW4;Q9NWB6;B4E3J6	Sa1-IAA	-0.258049	NA	NA	0	NA	NA	NA	0.714286	0	A0A024RDW4	Arginine and glutamate-rich protein 1	FLJ10154;ARGLU1	NA	cytosol [GO:0005829]; mitochondrion [GO:0005739]; nucleoplasm [GO:0005654]; nucleus [GO:0005634]	NA	NA	72
95	A0A024RE13;Q9NRR4;Q59FF9	Sa1-IAA	Inf	NA	NA	NA	NA	0	oneConditionMissing	0.714286	0	A0A024RE13	Ribonuclease 3	RNASEN;DROSHA	RNA processing [GO:0006396]; rRNA catabolic process [GO:0016075]	NA	ribonuclease III activity [GO:0004525]; RNA binding [GO:0003723]	NA	10
96	A0A075B6Q3;Q86YA6;H7C4B2	Sa1-IAA	-0.322022	0.256605	-1.25493	1	0.42833	0.823824	NA	0.571429	0	A0A075B6Q3	NA	BCORL1	NA	nucleoplasm [GO:0005654]; plasma membrane [GO:0005886]	NA	NA	3
97	A0A075X871;A0A343GM22;A0A3Q9X1C4;A0A343HGX5;A0A059QTG6;H9E795;A0A343GR13;A0A075X6R4;H9E7H3;H9E7J9;A0A343YS88;A0A3S9JHN0;A0A346M090;Q5Y0G2;Q5Y0J7;Q5Y0H4;Q5Y0F3;Q5Y0E5;Q5Y078;Q5Y070;Q5Y065;Q5Y011;Q5XZY3;Q5XZX9;Q5XZT6;Q5XZR9;Q5XZP7;Q5XZL8;Q5XZK9;Q5XZI9;Q5XZI8;Q5XZI3;Q5XZI2;Q5XZH6;A0A343GTX7;A0A218N9H4;B4YCG0;A0A344AJX0;A0A344AJ99;A0A343LFA6;T1Q6R9;T1Q5Q2;T1Q5P3;T1Q5B9;S4T6M3;Q9B2X0;Q9B2W9;Q9B2U6;Q9B…	Sa1-IAA	-0.0717024	0.430948	-0.166383	4	0.875927	0.977401	NA	0.428571	0	A0A075X871	Cytochrome c oxidase subunit 3	COX3;COIII;CO3;coxIII;MT-CO3	aerobic electron transport chain [GO:0019646]	integral component of membrane [GO:0016021]; mitochondrion [GO:0005739]	cytochrome-c oxidase activity [GO:0004129]	NA	1
98	A0A087WT20;Q9NV06;B3KME9;E5RHM4;A0A087X1F8	Sa1-IAA	#NAME?	NA	NA	NA	NA	0	oneConditionMissing	0.857143	0	A0A087WT20	DDB1- and CUL4-associated factor 13	DCAF13	protein ubiquitination [GO:0016567]	cell junction [GO:0030054]; centrosome [GO:0005813]; cytosol [GO:0005829]; nucleolus [GO:0005730]; nucleoplasm [GO:0005654]	NA	NA	7
99	A0A087WU03	Sa1-IAA	-0.999517	0.110016	-9.08517	4	0.000813824	0.276971	NA	0.142857	0	A0A087WU03	NA	HNRNPDL	NA	NA	NA	NA	139
100	A0A087WVP1;Q14517;D6RCE4;Q9UEJ6;H0Y9C8;H0Y9H4;E9PQ73;Q8TDW7	Sa1-IAA	-0.244013	0.100551	-2.42676	5	0.0596187	0.618718	NA	0.607143	0	A0A087WVP1	Protocadherin Fat 1;Protocadherin Fat 1, nuclear form	FAT1	homophilic cell adhesion via plasma membrane adhesion molecules [GO:0007156]	integral component of membrane [GO:0016021]; plasma membrane [GO:0005886]	calcium ion binding [GO:0005509]	NA	3
101	A0A087WVQ6;Q00610;J3KS13;A0A087WX41;P53675;K7EJJ5;J3KSQ2;J3QL20;J3KRF5;F5H5N6	Sa1-IAA	-1.07661	0.622374	-1.72984	6	0.134385	0.658061	NA	0.539683	0	A0A087WVQ6	Clathrin heavy chain;Clathrin heavy chain 1	CLTC	intracellular protein transport [GO:0006886]; vesicle-mediated transport [GO:0016192]	clathrin coat of coated pit [GO:0030132]; clathrin coat of trans-Golgi network vesicle [GO:0030130]; clathrin complex [GO:0071439]; endosome [GO:0005768]; lysosome [GO:0005764]; mitotic spindle [GO:0072686]	clathrin light chain binding [GO:0032051]; protein kinase binding [GO:0019901]; structural molecule activity [GO:0005198]	NA	180
102	A0A087WVR3;A0A087WTW0;Q96T88;A0A087WWG9;B4E0F9	Sa1-IAA	-0.00256812	0.48482	-0.00529707	2	0.996254	0.996403	NA	0.571429	0	A0A087WVR3	E3 ubiquitin-protein ligase UHRF1	UHRF1	cell cycle [GO:0007049]; histone monoubiquitination [GO:0010390]; maintenance of DNA methylation [GO:0010216]; negative regulation of transcription by RNA polymerase II [GO:0000122]; protein autoubiquitination [GO:0051865]	nuclear heterochromatin [GO:0005720]; nuclear matrix [GO:0016363]; nucleoplasm [GO:0005654]; replication fork [GO:0005657]	hemi-methylated DNA-binding [GO:0044729]; identical protein binding [GO:0042802]; metal ion binding [GO:0046872]; methylated histone binding [GO:0035064]; nucleosomal histone binding [GO:0031493]; ubiquitin protein ligase activity [GO:0061630]	NA	0
103	A0A087WWB9;Q504R6;P51153;D3DV69;A0A024RB27	Sa1-IAA	#NAME?	NA	NA	NA	NA	0	oneConditionMissing	0.714286	0	A0A087WWB9	Ras-related protein Rab-13	RAB13;hCG_1996054;hCG_24991	NA	cytosol [GO:0005829]; plasma membrane [GO:0005886]	GTPase activity [GO:0003924]; GTP binding [GO:0005525]	NA	38
104	A0A087WWP8;Q5VWQ0;A0A0C4DGT8;A0A0C4DH79	Sa1-IAA	-1.17193	1.10985	-1.05593	3	0.368516	0.795465	NA	0.428571	0	A0A087WWP8	Round spermatid basic protein 1	RSBN1	NA	nucleus [GO:0005634]	dioxygenase activity [GO:0051213]; metal ion binding [GO:0046872]	NA	17
105	A0A087WXM6;J3QQT2;J3KRX5;A0A024R261;A0A0A6YYL6;P18621;J3KRB3;A0A087WWH0;J3QS96;J3QLC8;A0A0A0MRF8;A0A087WY81;J3KSJ0	Sa1-IAA	-1.52889	0.246422	-6.20435	4	0.00343289	0.409061	NA	0.571429	0	A0A087WXM6	60S ribosomal protein L17	RPL17;hCG_24487;RPL17-C18orf32	translation [GO:0006412]	large ribosomal subunit [GO:0015934]	structural constituent of ribosome [GO:0003735]	NA	190
106	A0A087WYB4;Q9UJZ1;F2Z2I8;Q6ZNW0	Sa1-IAA	-1.03926	0.336203	-3.09116	3	0.0536648	0.615638	NA	0.5	0	A0A087WYB4	Stomatin-like protein 2, mitochondrial	STOML2	NA	membrane [GO:0016020]	NA	NA	32
107	A0A087WYN9;Q7Z478	Sa1-IAA	-2.06389	0.231631	-8.91025	3	0.00298161	0.409061	NA	0.357143	0	A0A087WYN9	ATP-dependent RNA helicase DHX29	DHX29	positive regulation of translational initiation [GO:0045948]	cytoplasm [GO:0005737]	ATP binding [GO:0005524]; RNA helicase activity [GO:0003724]; translation initiation factor activity [GO:0003743]	NA	36
108	A0A087WYY5;F8VR82;Q9UPN1;F8VYE8;A0A024RBP2;F8W0W8;P36873	Sa1-IAA	#NAME?	NA	NA	NA	NA	0	oneConditionMissing	0.714286	0	A0A087WYY5	Serine/threonine-protein phosphatase;Serine/threonine-protein phosphatase PP1-gamma catalytic subunit	PPP1CC	cell division [GO:0051301]; glycogen metabolic process [GO:0005977]	cleavage furrow [GO:0032154]; midbody [GO:0030496]; nucleolus [GO:0005730]; nucleoplasm [GO:0005654]; protein phosphatase type 1 complex [GO:0000164]	protein serine/threonine phosphatase activity [GO:0004722]	NA	123
109	A0A087WZ13;E9PAU2;K7EKR9;Q8IY67	Sa1-IAA	-0.0503136	0.523993	-0.0960196	3	0.92956	0.990127	NA	0.642857	0	A0A087WZ13	NA	RAVER1	NA	NA	RNA binding [GO:0003723]	NA	42
110	A0A087X0K9;Q6MZU1;G5E9E7;A9CQZ8;G3V1L9;Q07157;Q68DX9;B4DZK4;H0YKB1;Q9H317;H0Y3R8;H0YLT6	Sa1-IAA	0.0289702	0.242525	0.119452	5	0.909568	0.984803	NA	0.634921	0	A0A087X0K9	Tight junction protein ZO-1	TJP1;DKFZp686A1195;DKFZp686M05161	NA	bicellular tight junction [GO:0005923]; cell junction [GO:0030054]; cytosol [GO:0005829]; plasma membrane [GO:0005886]	NA	NA	35
111	A0A087X0Q1;Q7Z739;Q8NA80;A0A024R7W5;B4DPX9;A0A087WY31;Q658Z6;Q8N3V9;Q96MZ5;B4DT65;A0A087X0C3;S4R373	Sa1-IAA	-2.50733	0.210486	-11.9121	1	0.0533182	0.615638	NA	0.714286	0	A0A087X0Q1	YTH domain-containing family protein 3	YTHDF3;DKFZp451J085;DKFZp451A052	NA	NA	RNA binding [GO:0003723]	NA	34
112	A0A090N7X1;A0A090N7Y2;Q9UG63;C9JHK9;C9JZV3	Sa1-IAA	0.454012	0.332159	1.36685	3	0.26509	0.774145	NA	0.8	0	A0A090N7X1	ATP-binding cassette sub-family F member 2	ABCF2	NA	NA	ATPase activity [GO:0016887]; ATP binding [GO:0005524]	NA	24
113	A0A090N8Z0;Q8TA86;A0A090N8G7;A0A090N8Y9	Sa1-IAA	Inf	NA	NA	NA	NA	0	oneConditionMissing	0.857143	0	A0A090N8Z0	Retinitis pigmentosa 9 protein	RP9;LOC402478	RNA splicing [GO:0008380]	signal recognition particle receptor complex [GO:0005785]	NA	NA	52
114	A0A0A0MQS0;F8W9L8;A8MW92;A0A024R9G8;A0A0A8K9A6;H0YDF7	Sa1-IAA	-0.00982518	0.107386	-0.0914943	0	NA	NA	NA	0.571429	0	A0A0A0MQS0	PHD finger protein 20-like protein 1	PHF20L1;URLC1	regulation of transcription, DNA-templated [GO:0006355]	nucleus [GO:0005634]	metal ion binding [GO:0046872]	NA	1
115	A0A0A0MR02;A0A024QZT0;A0A024QZN9;P45880;B4DKM5;Q5JSD2;Q5JSD1;A2A3S1	Sa1-IAA	-0.444865	0.416787	-1.06737	7	0.321228	0.783886	NA	0.47619	0	A0A0A0MR02	Voltage-dependent anion-selective channel protein 2	VDAC2	NA	mitochondrial outer membrane [GO:0005741]; mitochondrion [GO:0005739]; pore complex [GO:0046930]	porin activity [GO:0015288]; voltage-gated anion channel activity [GO:0008308]	NA	58
116	A0A0A0MR74;O75907	Sa1-IAA	-0.493936	0.532903	-0.926877	3	0.422357	0.822951	NA	0.428571	0	A0A0A0MR74	Diacylglycerol O-acyltransferase 1	DGAT1	triglyceride biosynthetic process [GO:0019432]	endoplasmic reticulum membrane [GO:0005789]; integral component of membrane [GO:0016021]	diacylglycerol O-acyltransferase activity [GO:0004144]; retinol O-fatty-acyltransferase activity [GO:0050252]	NA	0
117	A0A0A0MRK1;Q5T3I0;E9PAV9;A8KAG1;F8W895;E9PPY4;F2Z3C6;B4DVU2	Sa1-IAA	-1.69963	0.947874	-1.7931	5	0.132934	0.658061	NA	0.771429	0	A0A0A0MRK1	G patch domain-containing protein 4	GPATCH4	NA	NA	nucleic acid binding [GO:0003676]	NA	37
118	A0A0A0MRM8;A0A1Y0BRN0;A0A1Y0BRN3;A0A590UJ40;E7EW20;Q9UM54;A0A590UKB0;A0A590UJ75;A0A0D9SGC1;A0A590UK22;A0A590UK71;A0A590UJW9;A0A590UJY4;A0A590UK86;Q5JVM0;Q14784	Sa1-IAA	-0.128983	0.231731	-0.556607	5	0.601788	0.883094	NA	0.542857	0	A0A0A0MRM8	Unconventional myosin-VI	MYO6	endocytosis [GO:0006897]; protein transport [GO:0015031]; sensory perception of sound [GO:0007605]	clathrin-coated pit [GO:0005905]; clathrin-coated vesicle [GO:0030136]; cytosol [GO:0005829]; filopodium [GO:0030175]; Golgi apparatus [GO:0005794]; microvillus [GO:0005902]; myosin complex [GO:0016459]; nucleoplasm [GO:0005654]; perinuclear region of cytoplasm [GO:0048471]; ruffle membrane [GO:0032587]	actin filament binding [GO:0051015]; ATP binding [GO:0005524]; motor activity [GO:0003774]	NA	42
119	A0A0A0MRP0;Q8IWC1	Sa1-IAA	-1.98472	0.344773	-5.75661	3	0.0104158	0.468305	NA	0.642857	0	A0A0A0MRP0	MAP7 domain-containing protein 3	MAP7D3	microtubule cytoskeleton organization [GO:0000226]	microtubule cytoskeleton [GO:0015630]	NA	NA	39
120	A0A0A0MS59;Q6ZRS2;A0A0C4DFX4;A0A087X0E3;G1UI29;B3KN63;Q6P4A2;Q6ZTM8	Sa1-IAA	0.279327	0.19455	1.43576	7	0.194211	0.731578	NA	0.469388	0	A0A0A0MS59	Helicase SRCAP	SRCAP	NA	Golgi apparatus [GO:0005794]; nuclear body [GO:0016604]; nucleoplasm [GO:0005654]	ATP binding [GO:0005524]; DNA binding [GO:0003677]	NA	8
121	A0A0A0MSK5;Q5JTV8;J3KN66;H0YD16;H0YDU3;H0Y4R4	Sa1-IAA	0.29634	0.487569	0.60779	5	0.569872	0.874946	NA	0.607143	0	A0A0A0MSK5	Torsin-1A-interacting protein 1	TOR1AIP1	NA	integral component of membrane [GO:0016021]; nuclear membrane [GO:0031965]	NA	NA	21
122	A0A0A0MSU2;A0PJD3;A0A024R689;A0A1C7CYX1;Q6PJG2;C9JYU7;Q8NF55	Sa1-IAA	0.212716	0.996126	0.213544	3	0.844592	0.964066	NA	0.357143	0	A0A0A0MSU2	ELM2 and SANT domain-containing protein 1	ELMSAN1;C14orf43	NA	nucleus [GO:0005634]	NA	NA	21
123	A0A0A0MTB8;Q8NI36	Sa1-IAA	-1.03064	0.292325	-3.52566	7	0.00965388	0.468305	NA	0.5	0	A0A0A0MTB8	WD repeat-containing protein 36	WDR36	rRNA processing [GO:0006364]	nucleolus [GO:0005730]; small-subunit processome [GO:0032040]	NA	NA	41
124	A0A0A0MTI6;B4DSC2;B3KWH9;A0A024RD35;Q9NYP7	Sa1-IAA	Inf	NA	NA	NA	NA	0	oneConditionMissing	0.714286	0	A0A0A0MTI6	Elongation of very long chain fatty acids protein;Elongation of very long chain fatty acids protein 5	ELOVL5	fatty acid elongation, saturated fatty acid [GO:0019367]; very long-chain fatty acid biosynthetic process [GO:0042761]	endoplasmic reticulum [GO:0005783]; endoplasmic reticulum membrane [GO:0005789]; integral component of membrane [GO:0016021]	3-oxo-arachidoyl-CoA synthase activity [GO:0102336]; 3-oxo-cerotoyl-CoA synthase activity [GO:0102337]; 3-oxo-lignoceronyl-CoA synthase activity [GO:0102338]; fatty acid elongase activity [GO:0009922]; very-long-chain 3-ketoacyl-CoA synthase activity [GO:0102756]	NA	11
125	A0A0A0MTR7;A0A0A0MTC1;Q63HN8	Sa1-IAA	-0.482907	0.164372	-2.93789	3	0.0606132	0.618718	NA	0.464286	0	A0A0A0MTR7	E3 ubiquitin-protein ligase RNF213	RNF213	angiogenesis [GO:0001525]	cytosol [GO:0005829]; nucleolus [GO:0005730]	ATPase activity [GO:0016887]; metal ion binding [GO:0046872]; ubiquitin-protein transferase activity [GO:0004842]	NA	1
126	A0A0A0N0L3;A0A024R4E2;Q13148;K7EJM5;A0A0A0N0N3;A0A087WX29;A0A0A0N0M3;K7EN94;B1AKP7;G3V162;A0A087X260;A0A087WYY0;B4DRW3;A0A087WXQ5;A0A087WV68;A0A087WW61;A0A087WX67;A0A087WXV3;A0A087WZC9	Sa1-IAA	-0.478496	0.359366	-1.3315	6	0.231376	0.751955	NA	0.530612	0	A0A0A0N0L3	TAR DNA-binding protein 43	TDP43;TARDBP	mRNA processing [GO:0006397]; RNA splicing [GO:0008380]	nucleus [GO:0005634]	RNA binding [GO:0003723]	NA	91
127	A0A0A1TE42;A0A0A1TTP8;Q9H6T0;J3QKU3	Sa1-IAA	#NAME?	NA	NA	NA	NA	0	oneConditionMissing	0.714286	0	A0A0A1TE42	Epithelial splicing regulatory protein 2	ESRP2	regulation of RNA splicing [GO:0043484]; RNA splicing [GO:0008380]	nucleus [GO:0005634]	RNA binding [GO:0003723]	NA	1
128	A0A0A6YYC7;A0A024R4Z4;A0A024R4Z1;Q96JP5	Sa1-IAA	-0.972398	0.535977	-1.81425	4	0.143834	0.6651	NA	0.428571	0	A0A0A6YYC7	E3 ubiquitin-protein ligase ZFP91	ZFP91-CNTF;hCG_2042749;ZFP91	NA	NA	NA	NA	0
129	A0A0A6YYG7;Q6IBW4;E5RJN3;H0YC55	Sa1-IAA	-0.484471	0.223848	-2.16428	4	0.0964257	0.618718	NA	0.571429	0	A0A0A6YYG7	Condensin-2 complex subunit H2	NCAPH2	chromosome condensation [GO:0030261]	cell junction [GO:0030054]; intercellular bridge [GO:0045171]; nucleoplasm [GO:0005654]	NA	NA	1
130	A0A0A6YYI3;A0A0B4J1V8;Q9NQ55;A8MV53;H7C446;C9J3W3;C9JHF7	Sa1-IAA	-0.408756	0.506143	-0.807592	7	0.445896	0.828125	NA	0.571429	0	A0A0A6YYI3	Suppressor of SWI4 1 homolog	PPAN-P2RY11;PPAN	NA	nucleolus [GO:0005730]	NA	NA	42
131	A0A0C4DFM1;A0A024QYR3;Q92544;B4DKC1;B4DYH6;B4DH88;Q6ZTK5	Sa1-IAA	-0.24106	0.579105	-0.416264	2	0.717635	0.935766	NA	0.571429	0	A0A0C4DFM1	Transmembrane 9 superfamily member 4	TM9SF4	NA	integral component of membrane [GO:0016021]	NA	NA	2
132	A0A0C4DFX7;Q9H967;C9JE56	Sa1-IAA	0.342415	0.254562	1.34512	2	0.310816	0.783886	NA	0.285714	0	A0A0C4DFX7	WD repeat-containing protein 76	WDR76	cellular response to DNA damage stimulus [GO:0006974]	NA	NA	NA	8
133	A0A0C4DG68;A0A0A0MR59;B7ZL34;C9JW01	Sa1-IAA	0.412024	NA	NA	0	NA	NA	NA	0.714286	0	A0A0C4DG68	NA	PUM2	NA	cytosol [GO:0005829]; nuclear membrane [GO:0031965]	RNA binding [GO:0003723]	NA	22
134	A0A0C4DG88;A0A345S7Y2;B3KRE9;A0A0P0GE07;A0A024R8Y2;P14859	Sa1-IAA	Inf	NA	NA	NA	NA	0	oneConditionMissing	0.857143	0	A0A0C4DG88	POU domain protein;POU domain, class 2, transcription factor 1	POU2F1	NA	endoplasmic reticulum [GO:0005783]; intracellular membrane-bounded organelle [GO:0043231]; nucleoplasm [GO:0005654]	DNA binding [GO:0003677]; DNA-binding transcription factor activity, RNA polymerase II-specific [GO:0000981]	NA	2
135	A0A0C4DGS1;A0A024RAD5;P39656;U3KQ84	Sa1-IAA	0.0235785	0.625082	0.0377206	2	0.973337	0.996403	NA	0.821429	0	A0A0C4DGS1	Dolichyl-diphosphooligosaccharide--protein glycosyltransferase 48 kDa subunit	DDOST	protein N-linked glycosylation via asparagine [GO:0018279]	endoplasmic reticulum [GO:0005783]; endoplasmic reticulum membrane [GO:0005789]; integral component of membrane [GO:0016021]	NA	NA	59
136	A0A0C4DGS9;B3KN25;A0A024R0C0;Q9Y6K0	Sa1-IAA	NA	NA	NA	NA	NA	NA	completeMissing	1	0	A0A0C4DGS9	Choline/ethanolaminephosphotransferase 1	CEPT1	phospholipid biosynthetic process [GO:0008654]	integral component of membrane [GO:0016021]	phosphotransferase activity, for other substituted phosphate groups [GO:0016780]	NA	6
137	A0A0C4DH44;A0A024R9D3;P62888;A0A0B4J213;E5RI99;E5RJH3	Sa1-IAA	-1.71635	0.809387	-2.12056	4	0.101278	0.618718	NA	0.714286	0	A0A0C4DH44	60S ribosomal protein L30	RPL30	NA	cytosolic large ribosomal subunit [GO:0022625]	RNA binding [GO:0003723]; structural constituent of ribosome [GO:0003735]	NA	111
138	A0A0D9SFB3;A0A2R8YF78;A0A0D9SG12;A0A2R8YFS5;B5BTY4;A0A2R8Y4A4;A0A0D9SF53;O00571;A0A2R8YCW1;A0A2R8YFR4;A0A2U3TZJ9;Q59GX6;A0A2R8Y645;A0A2R8Y5G6;F6S8Q4;A0A2R8YDT5;A0A2R8Y7T2;A0A2R8YDH3;B4DLU5;A0A024R9A4;O15523;Q5S4N1;B4E010;B4E132;A0A087WVZ1;A0A0J9YVQ7;A0A2R8YCU0;A0A2R8Y650;B4E3C4;B4DLA0;A0A2R8YF89;A0A087WX09;C9J081;C9J8G5;D6RCM4;Q9NQI0;A0A2R8Y770;A0A2R8Y4D2;H0Y960	Sa1-IAA	0.692499	0.348025	1.9898	7	0.0869172	0.618718	NA	0.557143	0	A0A0D9SFB3	ATP-dependent RNA helicase DDX3X;ATP-dependent RNA helicase DDX3Y	DDX3X;DDX3Y	NA	cytosol [GO:0005829]; nucleoplasm [GO:0005654]	ATP binding [GO:0005524]; nucleic acid binding [GO:0003676]; RNA helicase activity [GO:0003724]	NA	212
139	A0A0D9SFL2;M0QYH2;A0A1S5RA93;Q96T60	Sa1-IAA	-0.85136	0.715626	-1.18967	0	NA	NA	NA	0.714286	0	A0A0D9SFL2	Bifunctional polynucleotide phosphatase/kinase;Polynucleotide 3-phosphatase;Polynucleotide 5-hydroxyl-kinase	PNKP	DNA repair [GO:0006281]	nucleolus [GO:0005730]; nucleoplasm [GO:0005654]	ATP-dependent polydeoxyribonucleotide 5'-hydroxyl-kinase activity [GO:0046404]; polynucleotide 3'-phosphatase activity [GO:0046403]	NA	2
140	A0A0D9SGE8;Q8IWS0;B4E138;Q5JRC6	Sa1-IAA	-0.383239	0.706639	-0.54234	2	0.641935	0.904021	NA	0.642857	0	A0A0D9SGE8	PHD finger protein 6	PHF6	NA	nucleolus [GO:0005730]; nucleoplasm [GO:0005654]	metal ion binding [GO:0046872]	NA	42
141	A0A0D9SGH8;A0A2Z5HTM8;E2GH26;C6ZRK2;A0A0A0MTL7;E2GH18;Q5VVR7;C6ZRK1;E2GH15;E2GH13;E2GH16;C6ZRJ7;A0A2Z5HTN9;C6ZRK5;Q6FHW4;B5BU30;Q9NQB0;E2GH23;Q5JRY3;B4E165;Q5JRY5;B7Z9Z6;B4DJZ2;B4DWD5;C6ZRK4;C6ZRJ5;C6ZRJ6;H0YBP2;H0YEE5;B3KQC6;A0A1B0GUV5;H0YAR8;B3KQ75;B3KSI6;H0YBC8;B4DZY5;A0A024RDI7;B7WNT5;P36402;Q9UJU2;Q9HCS4;Q659G9;Q5JRY4;Q5VVR5	Sa1-IAA	0.234298	0.773775	0.302799	7	0.770843	0.945699	NA	0.5	0	A0A0D9SGH8	Transcription factor 7-like 2	TCF7L2	Wnt signaling pathway [GO:0016055]	nucleus [GO:0005634]	DNA binding [GO:0003677]	NA	1
142	A0A0F7KYT8;A0A0F7L0Q8;A0A0F7L1S3;P51114;B4DXZ6;B4DM78;E9PFF5;B4DM21;E7EU85;B4DGH9;H7C4S4;Q14341;C9JZE0;C9JY20;C9JAJ4;C9JYQ6;A0A0F7L2Z7;C9IZ22	Sa1-IAA	-0.173792	0.237676	-0.731213	7	0.488398	0.851572	NA	0.472527	0	A0A0F7KYT8	Fragile X mental retardation syndrome-related protein 1	FXR1	muscle organ development [GO:0007517]; regulation of translation [GO:0006417]	cytoplasm [GO:0005737]	mRNA binding [GO:0003729]	NA	46
143	A0A0G2JIS2;B7Z852;A2ABF8;A0A0G2JIR1;A0A1U9X7P8;A0A024RCN9;A2ABF9;A0A0G2JK64;Q96KQ7;Q59FM7;A0A0G2JRR0;A0A0G2JRN8;H0Y4K5	Sa1-IAA	0.10198	0.0660939	1.54296	1	0.366083	0.792452	NA	0.571429	0	A0A0G2JIS2	Histone-lysine N-methyltransferase EHMT2	EHMT2	NA	nucleus [GO:0005634]	histone-lysine N-methyltransferase activity [GO:0018024]; p53 binding [GO:0002039]; zinc ion binding [GO:0008270]	NA	12
144	A0A0G2JN29;A0A087X117;Q15155;A0A0G2JP90;A0A087WW46;J3KN36;P69849;Q5JPE7;Q1LZN2;Q9H049;H3BUC9;A0A087WTD5;H3BPS9	Sa1-IAA	-0.192209	0.594372	-0.323381	7	0.755853	0.941025	NA	0.571429	0	A0A0G2JN29	Nodal modulator 1;Nodal modulator 3;Nodal modulator 2	NOMO1;NOMO3;NOMO2	NA	NA	carbohydrate binding [GO:0030246]	NA	19
145	A0A0G2JSE9;C9JTA6;B4E117;B4DRT1;A0A2R8Y5N5;Q9H836;G5E975;Q12824;A0A2R8YDN6;Q86WI8;A0A0U1RQQ2;Q86WI7;A0A0U1RRB8;B5MCL5;A0A2R8YEE8;A0A0G2JRV3	Sa1-IAA	0.00511766	0.774723	0.0066058	1	0.995795	0.996403	NA	0.428571	0	A0A0G2JSE9	SWI/SNF-related matrix-associated actin-dependent regulator of chromatin subfamily B member 1	SMARCB1	chromatin remodeling [GO:0006338]	nuclear chromosome [GO:0000228]	NA	NA	26
146	A0A0J9YWL0;B3KWJ0;Q9Y4K1;B3KPT0;A0A494C1M5	Sa1-IAA	0.376916	0.424313	0.888298	6	0.408577	0.821036	NA	0.6	0	A0A0J9YWL0	Absent in melanoma 1 protein	AIM1	NA	NA	carbohydrate binding [GO:0030246]	NA	5
147	A0A0J9YYL3;A0A0J9YXJ8;A0A0J9YVP6;A0A0J9YXX5;Q9UHX1;E9PMU7;E9PN18;A0A0J9YVR6;E9PQ56;A0A0J9YWM1;H0YEM1;E9PL19;H0YCP8	Sa1-IAA	0.0742172	0.30523	0.243152	4	0.819848	0.964066	NA	0.678571	0	A0A0J9YYL3	Poly(U)-binding-splicing factor PUF60	PUF60	mRNA processing [GO:0006397]; RNA splicing [GO:0008380]	nucleus [GO:0005634]	RNA binding [GO:0003723]	NA	145
148	A0A0R4J2E8;A8MXP9;P43243;D6REM6;Q68D11;D6R991;Q5CZA7;B3KM87;B4DF66;Q9H4N1;H0Y8T4;Q68E03;D6R8Z5;D6RCM3;D6REK4;D6RBI2;D6RBK5;D6RE02;D6RB45;A0A1B0GX04;D6R9F3;D6RAM9;D6RAY2;D6RBS2	Sa1-IAA	0.0687534	0.353304	0.194601	7	0.851232	0.967783	NA	0.489796	0	A0A0R4J2E8	Matrin-3	MATR3;DKFZp686K23100	NA	nucleus [GO:0005634]	RNA binding [GO:0003723]; zinc ion binding [GO:0008270]	NA	171
149	A0A0S2Q0B1;O14497;H0Y488;A0A1B0GTU5;Q4LE49;Q96TA9;A0A087WUV6;Q8NC65;Q96T01;Q96SM7;Q96SY8;H0YCU6;A4FU79;H0YEW5	Sa1-IAA	-0.0368627	0.527723	-0.0698524	5	0.947019	0.995784	NA	0.591837	0	A0A0S2Q0B1	AT-rich interactive domain-containing protein 1A	ARID1A;ARID1A variant protein	chromatin remodeling [GO:0006338]	brahma complex [GO:0035060]; SWI/SNF complex [GO:0016514]	DNA binding [GO:0003677]	NA	24
150	A0A0S2Z3L2;P16615;H7C5W9;Q8N3X5;Q7Z675;O14983;Q7Z6E5;B3KS35;A8K9K1;Q93084;J3QSY6;A0A0S2Z3H0;A0A0S2Z425;H3BVB2;A0A0C4DH86;B1PM99	Sa1-IAA	0.131349	0.333723	0.393588	7	0.705599	0.929207	NA	0.39881	0	A0A0S2Z3L2	Sarcoplasmic/endoplasmic reticulum calcium ATPase 2	ATP2A2	calcium ion import into sarcoplasmic reticulum [GO:1990036]; cardiac muscle hypertrophy in response to stress [GO:0014898]; cellular response to heat [GO:0034605]; cellular response to oxidative stress [GO:0034599]; ER-nucleus signaling pathway [GO:0006984]; negative regulation of heart contraction [GO:0045822]; organelle organization [GO:0006996]; positive regulation of endoplasmic reticulum cal…	apical ectoplasmic specialization [GO:0061831]; extrinsic component of cytoplasmic side of plasma membrane [GO:0031234]; integral component of membrane [GO:0016021]; perinuclear region of cytoplasm [GO:0048471]; plasma membrane bounded cell projection [GO:0120025]; protein-containing complex [GO:0032991]; ribbon synapse [GO:0097470]; sarcoplasmic reticulum membrane [GO:0033017]; vesicle membrane …	ATP binding [GO:0005524]; calcium ion binding [GO:0005509]; calcium-transporting ATPase activity involved in regulation of cardiac muscle cell membrane potential [GO:0086039]; enzyme binding [GO:0019899]; lutropin-choriogonadotropic hormone receptor binding [GO:0031775]	NA	92
151	A0A0S2Z487;A0A024R1X8;P14923;A0A0S2Z495;Q7KZ86	Sa1-IAA	0.658423	0.8777	0.750168	7	0.477605	0.842201	NA	0.505495	0	A0A0S2Z487	Junction plakoglobin	JUP	cell-cell adhesion [GO:0098609]; desmosome assembly [GO:0002159]; skin development [GO:0043588]	actin cytoskeleton [GO:0015629]; adherens junction [GO:0005912]; apicolateral plasma membrane [GO:0016327]; catenin complex [GO:0016342]; cytoplasmic side of plasma membrane [GO:0009898]; cytosol [GO:0005829]; desmosome [GO:0030057]; fascia adherens [GO:0005916]; intermediate filament [GO:0005882]; lateral plasma membrane [GO:0016328]; Z disc [GO:0030018]	alpha-catenin binding [GO:0045294]; cadherin binding [GO:0045296]; protein-containing complex binding [GO:0044877]; protein kinase binding [GO:0019901]; structural molecule activity [GO:0005198]	A0A0S2Z487;A0A024R1X8;P14923;A0A0S2Z495;Q7KZ86	109
152	A0A0S2Z491;P06748;A0A140VJQ2;A0A0S2Z4G7;A4ZU86;Q9BTI9;Q9NX34;A0A024R3V9;V9HVU7;A0A024RAP1;E5RI98;E5RGW4	Sa1-IAA	0.241141	0.730158	0.330259	7	0.750869	0.941025	NA	0.571429	0	A0A0S2Z491	Nucleophosmin	NPM1	NA	cytoplasm [GO:0005737]; nucleolus [GO:0005730]; nucleoplasm [GO:0005654]	RNA binding [GO:0003723]	NA	252
153	A0A0S2Z4V6;O76024;H0Y9G5	Sa1-IAA	-0.327113	0.317125	-1.03149	3	0.378184	0.807794	NA	0.678571	0	A0A0S2Z4V6	Wolframin	WFS1	calcium ion homeostasis [GO:0055074]; endoplasmic reticulum unfolded protein response [GO:0030968]; negative regulation of ATF6-mediated unfolded protein response [GO:1903892]; negative regulation of DNA-binding transcription factor activity [GO:0043433]; negative regulation of endoplasmic reticulum stress-induced intrinsic apoptotic signaling pathway [GO:1902236]; negative regulation of transcri…	endoplasmic reticulum [GO:0005783]; integral component of synaptic vesicle membrane [GO:0030285]	activating transcription factor binding [GO:0033613]; ATPase binding [GO:0051117]; calcium-dependent protein binding [GO:0048306]; calmodulin binding [GO:0005516]; proteasome binding [GO:0070628]; ubiquitin protein ligase binding [GO:0031625]	NA	0
154	A0A0S2Z4Z0;Q96PK6;Q59GV2;B4DNG4;A0A0S2Z567;A0A0A6YYI9;A0A0S2Z5V2;F8WDX3;A0A0A0MSL8;B8ZZ74	Sa1-IAA	-0.1252	0.334125	-0.374711	7	0.71897	0.936311	NA	0.396104	0	A0A0S2Z4Z0	RNA-binding protein 14	RBM14	centriole assembly [GO:0098534]; SMAD protein signal transduction [GO:0060395]	nuclear speck [GO:0016607]	RNA binding [GO:0003723]	NA	52
155	A0A0S2Z5A5;A0A024R8V0;Q9UHD8;A0A024R8Q0;K7EL40;Q1WWK5;A0A0S2Z5W9;K7ER14;K7EK18;K7EIR4;K7EKN4;K7EN52;K7EJV0;K7ENQ5;K7EJ51;K7EJZ2;K7ELJ9;K7ER52;K7EPY1;K7ENL0;K7EIE4;K7EQD7;K7EJL9;B4DTL7;K7ERG1	Sa1-IAA	-0.334501	0.296042	-1.12991	5	0.309786	0.783886	NA	0.666667	0	A0A0S2Z5A5	Septin-9	2009-09-01	NA	actin cytoskeleton [GO:0015629]	GTP binding [GO:0005525]	NA	79
156	A0A0S2Z5B2;O00257;A0A0S2Z4Q9;F8WCW6	Sa1-IAA	Inf	NA	NA	NA	NA	0	oneConditionMissing	0.714286	0	A0A0S2Z5B2	E3 SUMO-protein ligase CBX4	CBX4	negative regulation of transcription by RNA polymerase II [GO:0000122]; protein sumoylation [GO:0016925]	nuclear body [GO:0016604]; nucleoplasm [GO:0005654]	chromatin binding [GO:0003682]; methylated histone binding [GO:0035064]; phosphoprotein binding [GO:0051219]; single-stranded RNA binding [GO:0003727]; SUMO binding [GO:0032183]; transcription regulatory region sequence-specific DNA binding [GO:0000976]	NA	8
157	A0A0S2Z5C3;Q9NWT1	Sa1-IAA	-0.565432	0.552189	-1.02398	5	0.352806	0.790424	NA	0.619048	0	A0A0S2Z5C3	p21-activated protein kinase-interacting protein 1	PAK1IP1	cell population proliferation [GO:0008283]; roof of mouth development [GO:0060021]	nucleolus [GO:0005730]	NA	NA	22
158	A0A0S2Z5H3;A0A0S2Z4Y4;Q14677;H0YD52	Sa1-IAA	0.237731	0.609464	0.390066	3	0.722533	0.937365	NA	0.6	0	A0A0S2Z5H3	Clathrin interactor 1	CLINT1	clathrin coat assembly [GO:0048268]; vesicle-mediated transport [GO:0016192]	clathrin-coated vesicle [GO:0030136]; Golgi apparatus [GO:0005794]; intracellular membrane-bounded organelle [GO:0043231]; membrane [GO:0016020]; nucleoplasm [GO:0005654]	clathrin binding [GO:0030276]	NA	40
159	A0A0S2Z5N2;A0A024R2F9;Q9BTV4	Sa1-IAA	0.985524	NA	NA	0	NA	NA	NA	0.714286	0	A0A0S2Z5N2	Transmembrane protein 43	TMEM43	NA	integral component of membrane [GO:0016021]	NA	NA	4
160	A0A0S2Z5V7;A0A3B3IUB5;Q8TCT9;A0A075B6F6;A0A0S2Z6F0;A0A3B3IT72;A0A0C4DGU3	Sa1-IAA	-1.43016	0.486231	-2.94132	7	0.0216724	0.500978	NA	0.5	0	A0A0S2Z5V7	Minor histocompatibility antigen H13	HM13	NA	endoplasmic reticulum [GO:0005783]; integral component of membrane [GO:0016021]	aspartic-type endopeptidase activity [GO:0004190]	NA	22
161	A0A0U1RQF0;P49327;A0A0U1RRG3;Q6PJJ3;A0A1B0GTR5;Q13587	Sa1-IAA	-0.210724	0.293619	-0.717679	2	0.547461	0.868716	NA	0.714286	0	A0A0U1RQF0	Fatty acid synthase;[Acyl-carrier-protein] S-acetyltransferase;[Acyl-carrier-protein] S-malonyltransferase;3-oxoacyl-[acyl-carrier-protein] synthase;3-oxoacyl-[acyl-carrier-protein] reductase;3-hydroxyacyl-[acyl-carrier-protein] dehydratase;Enoyl-[acyl-carrier-protein] reductase;Oleoyl-[acyl-carrier-protein] hydrolase	FASN	fatty acid biosynthetic process [GO:0006633]	cytosol [GO:0005829]; Golgi apparatus [GO:0005794]; plasma membrane [GO:0005886]	(3R)-hydroxymyristoyl-[acyl-carrier-protein] dehydratase activity [GO:0008659]; [acyl-carrier-protein] S-acetyltransferase activity [GO:0004313]; [acyl-carrier-protein] S-malonyltransferase activity [GO:0004314]; 3-hydroxydecanoyl-[acyl-carrier-protein] dehydratase activity [GO:0008693]; 3-hydroxyoctanoyl-[acyl-carrier-protein] dehydratase activity [GO:0047451]; 3-hydroxypalmitoyl-[acyl-carrier-p…	NA	167
162	A0A0U1RRM1;B3KSZ4;Q8WXI9;A0A0U1RR30;A0A0U1RR34;A0A1B0GW07	Sa1-IAA	-0.0587911	0.502712	-0.116948	4	0.912538	0.986013	NA	0.6	0	A0A0U1RRM1	Transcriptional repressor p66-beta	GATAD2B	negative regulation of transcription by RNA polymerase II [GO:0000122]	nucleoplasm [GO:0005654]	sequence-specific DNA binding [GO:0043565]; zinc ion binding [GO:0008270]	NA	50
163	A0A140VJX5;Q96SK2;C9J5K4;C9JYX1	Sa1-IAA	0.676666	0.43546	1.55391	4	0.195172	0.731578	NA	0.571429	0	A0A140VJX5	Transmembrane protein 209	TMEM209	NA	integral component of membrane [GO:0016021]	NA	NA	3
164	A0A140VK53;Q9UQ35;O60382;I3L4D8;Q9UQ39;I3L182;A0AUK8;I3L1I8;A0A087X1W1;Q05BI2;Q05CV9;I3L1C0;I3L3Q8;I3L0N7;I3L4U6;Q5JPB4	Sa1-IAA	-0.36384	0.284915	-1.27702	7	0.242322	0.758929	NA	0.442396	0	A0A140VK53	Serine/arginine repetitive matrix protein 2	SRRM2;KIAA0324	NA	nuclear speck [GO:0016607]	NA	NA	141
165	A0A140VKH3;Q9ULX6;B3KMD4;V9GZ50;M0R1Y5;M0R010;M0QYT7	Sa1-IAA	-0.4236	0.372747	-1.13643	0	NA	NA	NA	0.785714	0	A0A140VKH3	A-kinase anchor protein 8-like	AKAP8L	NA	nuclear matrix [GO:0016363]	DNA binding [GO:0003677]	NA	34
166	A0A172Q398;A0A024R2T5;Q9H5V8	Sa1-IAA	Inf	NA	NA	NA	NA	0	oneConditionMissing	0.857143	0	A0A172Q398	CUB domain-containing protein 1	CDCP1	NA	NA	NA	NA	0
167	A0A1B0GUB2;A0A3B3IRP5;Q6P1J9;B4DV47;A0A0S2Z5M9;A0A2R8YHB3;A0A3B3ISN2;A0A2R8Y640;A0A0S2Z5N1	Sa1-IAA	0.999334	0.335056	2.98259	2	0.0964272	0.618718	NA	0.666667	0	A0A1B0GUB2	Parafibromin	CDC73	histone modification [GO:0016570]; transcription elongation from RNA polymerase II promoter [GO:0006368]	Cdc73/Paf1 complex [GO:0016593]; cytosol [GO:0005829]; nucleoplasm [GO:0005654]	NA	NA	50
168	A0A1B0GVU9;A0A0U1RR79;H7C0R3;Q9H3A5;Q9BUZ3;B4DDN1;Q96AW5;B4DNN3;Q53HS0;A8K3A8;P47897	Sa1-IAA	-0.744525	0.973222	-0.765011	2	0.524208	0.866046	NA	0.428571	0	A0A1B0GVU9	Glutamine--tRNA ligase	QARS	glutaminyl-tRNA aminoacylation [GO:0006425]	cytoplasm [GO:0005737]	ATP binding [GO:0005524]; glutamine-tRNA ligase activity [GO:0004819]	NA	94
169	A0A1B0GW03	Sa1-IAA	-0.453974	0.376407	-1.20607	1	0.440704	0.828125	NA	0.571429	0	A0A1B0GW03	NA	NA	NA	NA	NA	NA	0
170	A0A1B0GW05;Q2PZI1	Sa1-IAA	0.0742496	0.715258	0.103808	7	0.920233	0.987887	NA	0.285714	0	A0A1B0GW05	Probable C-mannosyltransferase DPY19L1	DPY19L1	NA	integral component of membrane [GO:0016021]	NA	NA	4
171	A0A1C9J735;A0A1C9J732;Q8TEK3;V9GY76	Sa1-IAA	-0.150564	0.358776	-0.419661	3	0.702974	0.929207	NA	0.285714	0	A0A1C9J735	Histone-lysine N-methyltransferase, H3 lysine-79 specific	DOT1L	chromatin silencing [GO:0006342]; regulation of cell cycle [GO:0051726]	nucleus [GO:0005634]	histone methyltransferase activity (H3-K79 specific) [GO:0031151]	NA	14
172	A0A1P0AZG4;A0PJI9	Sa1-IAA	#NAME?	NA	NA	NA	NA	0	oneConditionMissing	0.714286	0	A0A1P0AZG4	NA	C10orf12	NA	nucleoplasm [GO:0005654]	NA	NA	7
173	A0A1U9X7B3;A0A1U9X7B8;A0A1U9X7B4;A0A1U9X7A8;X5CF57;A0A024RCR5;H0Y6K2;A0A140T9E9;A0A0G2JK44;P25440;A0A0G2JHN8;A0A140T9I1;H0YDJ7;U3KPW0;E9PIQ3;U3KQA6;A0A0G2JHL0;A0A140T9F7;A0A140T9V2	Sa1-IAA	NA	NA	NA	NA	NA	NA	NA	0.857143	0	A0A1U9X7B3	Bromodomain-containing protein 2	BRD2	chromatin organization [GO:0006325]	NA	NA	NA	19
174	A0A1U9X8D3;A0A1U9X8C7;A0A0G2JHC2;A0A024RCJ8;Q6NYC8;A0A1U9X8C1;A0A1U9X8D1	Sa1-IAA	-0.12509	0.555949	-0.225002	4	0.833005	0.964066	NA	0.571429	0	A0A1U9X8D3	Phostensin	hCG_1821276;PPP1R18	NA	NA	phosphatase binding [GO:0019902]	NA	14
175	A0A1U9X9A5;A0A1U9X987;A0A1U9X9A9;A0A1U9X999;A0A1U9X996;A0A1U9X993;A0A1U9X985;A0A1U9X982;A0A1U9X977;A0A1U9X975;A0A1U9X974;A0A1U9X972;P48634;A0A1U9X998;A0A1U9X988;B4DLY2;B4DZ56;B4DQ12	Sa1-IAA	0.198839	0.319936	0.621497	5	0.561508	0.869977	NA	0.628571	0	A0A1U9X9A5	Protein PRRC2A	PRRC2A	NA	NA	NA	NA	71
176	A0A1U9X9D5;A0A1U9X9C8;A0A1U9X9C7;A0A1U9X9C4;A0A1U9X9C1;A0A1U9X9A3;A0A1U9X9A1;A0A024RCN6;P26640;A0A140T936;A0A140T954;B4DT32;A2ABF4;A0A0G2JJT9	Sa1-IAA	0.485089	0.552286	0.878329	4	0.429359	0.823824	NA	0.535714	0	A0A1U9X9D5	Valine--tRNA ligase	VARS	valyl-tRNA aminoacylation [GO:0006438]	NA	aminoacyl-tRNA editing activity [GO:0002161]; ATP binding [GO:0005524]; valine-tRNA ligase activity [GO:0004832]	NA	100
177	A0A1U9XBE3;A0A1U9XBE0;A0A1U9XBC1;A0A1U9XBC0;Q14676;A0A1U9XBD9;A0A1U9XBF2;A0A1U9XBB2;A0A1U9XBD4;A0A1U9XBC2;B4DYH4;A0A1U9XBE1;A0A1U9XBC3;A2AB05;A1Z5I7;A1Z5I6;H0Y6Z8;A0A291LM21	Sa1-IAA	-0.338541	0.158817	-2.13165	7	0.0704986	0.618718	NA	0.55	0	A0A1U9XBE3	Mediator of DNA damage checkpoint protein 1	MDC1	cell cycle [GO:0007049]	chromosome [GO:0005694]	NA	NA	42
178	A0A1W2PQ63;E9PFQ4;Q86SQ0;Q6ZUM0;Q69YN5;E9PGF6;B4DL46;Q69YR3;G5E9V3;Q8IXY4;E9PDY7	Sa1-IAA	0.435459	0.558285	0.779994	5	0.470687	0.838806	NA	0.5	0	A0A1W2PQ63	Pleckstrin homology-like domain family B member 2	PHLDB2;DKFZp686P22161;DKFZp686J162	NA	NA	NA	NA	5
179	A0A1W2PRB5;A0A0J9YVS1;A0A3B3IT55;A0A0G2JNB1;A0A0G2JNT7;A0A024R9Y2;Q7Z3B3;A0A1W2PPV8;A0A0G2JQF5;A0A0G2JQF4;A0A1W2PRR3;A0A1W2PQT4;I3L233;A0A1W2PS83;A0A0U1RR24;A0A1W2PRA9;A0AUZ9	Sa1-IAA	0.334813	0.29653	1.1291	0	NA	NA	NA	0.571429	0	A0A1W2PRB5	KAT8 regulatory NSL complex subunit 1	KIAA1267;KANSL1	NA	histone acetyltransferase complex [GO:0000123]; nucleoplasm [GO:0005654]	NA	NA	2
180	A0A1W2PRV5;E7EQZ4;Q16637;A0A3G6V3P1;A0A3G6V713;A0A3G6V6Q6;B4DP61;A0A3G6V326;A0A3G6V344;Q9UNT8;A0A3G6V5W2;A0A3G6V4Y6;I3QJX8;I6T6Y4;I2E4T0;I2E4T1;I3QJX9;A0A076L8Z0	Sa1-IAA	-0.0339874	0.995842	-0.0341293	3	0.974918	0.996403	NA	0.714286	0	A0A1W2PRV5	Survival motor neuron protein	SMN1;SMN2	mRNA processing [GO:0006397]; RNA splicing [GO:0008380]	Cajal body [GO:0015030]; cytosol [GO:0005829]; nuclear body [GO:0016604]	RNA binding [GO:0003723]	NA	49
181	A0A1X7SBZ2;A0A1W2PQ51;Q59F66;Q92841;B4DZQ7;A0A0U1RQJ0;Q9UQL5	Sa1-IAA	-0.847595	0.281172	-3.01451	7	0.0195374	0.500978	NA	0.404762	0	A0A1X7SBZ2	Probable ATP-dependent RNA helicase DDX17	DDX17	NA	nuclear speck [GO:0016607]	ATP binding [GO:0005524]; nucleic acid binding [GO:0003676]; RNA helicase activity [GO:0003724]	NA	238
182	A0A286YES6;A0A0A6YYJ5	Sa1-IAA	-0.010156	NA	NA	0	NA	NA	NA	0.714286	0	A0A286YES6	NA	MACF1	NA	NA	NA	NA	39
183	A0A286YEY4;Q6N093;Q6MZU6;P01859;Q68CN4;A0A286YFJ8;Q6MZX7;P01861	Sa1-IAA	-1.33569	0.444285	-3.00639	2	0.0951168	0.618718	NA	0.428571	0	A0A286YEY4	Ig gamma-2 chain C region	DKFZp686I04196;DKFZp686C15213;IGHG2;DKFZp686E23209	NA	integral component of membrane [GO:0016021]	NA	NA	0
184	A0A2P0H7U5;A0A024R8K8;P42694;J3QS41;B7ZLW2;A0A075B6R3	Sa1-IAA	0.314349	0.141969	2.21421	1	0.270059	0.778898	NA	0.571429	0	A0A2P0H7U5	Probable helicase with zinc finger domain	HELZ	NA	NA	helicase activity [GO:0004386]; metal ion binding [GO:0046872]	NA	9
185	A0A2Q2TH77;Q08379;B7ZC06;H0Y7B8;A0A1W2PQY5;R4GND7	Sa1-IAA	0.0789843	0.540743	0.146066	6	0.888653	0.984548	NA	0.514286	0	A0A2Q2TH77	Golgin subfamily A member 2	GOLGA2	NA	NA	NA	NA	26
186	A0A2R8Y4Z0;A0A024RA85;Q14004;A0A024RA66;A0A2R8Y7W5;A0A2R8YF61;A0A2R8YFE7;A0A2R8YD28;A0A2R8Y7Y0;A0A2R8YCQ1	Sa1-IAA	0.534585	0.0646256	8.27203	1	0.0765889	0.618718	NA	0.714286	0	A0A2R8Y4Z0	Cyclin-dependent kinase 13	CDC2L5;CDK13	NA	NA	ATP binding [GO:0005524]; protein kinase activity [GO:0004672]	NA	36
187	A0A2R8Y567;A0A2R8YEH8;A0A2R8Y801;A0A2R8Y854;A0A2R8YFI6;B7Z1J8;A0A2U3TZM5;A0A2U3TZM6;A0A2R8Y6D1;B7Z914;A0A2U3TZJ7;A0A220K8H0;Q99808	Sa1-IAA	0.683102	NA	NA	0	NA	NA	NA	0.714286	0	A0A2R8Y567	Equilibrative nucleoside transporter 1	SLC29A1	NA	integral component of plasma membrane [GO:0005887]	nucleoside transmembrane transporter activity [GO:0005337]	NA	14
188	A0A2R8Y623;P62081;B5MCP9	Sa1-IAA	Inf	NA	NA	NA	NA	0	oneConditionMissing	0.714286	0	A0A2R8Y623	40S ribosomal protein S7	RPS7	translation [GO:0006412]	ribosome [GO:0005840]	structural constituent of ribosome [GO:0003735]	NA	200
189	A0A2R8Y765;A0A2R8Y7U4;A0A2U3TZQ7;A0A2R8Y7I9;A0A2R8Y4T4;A0A2R8YES3;A0A2R8Y855;B4DGM3;A0A024R1S7;Q969G3;J3QKS7;J3QR61;J3KT85;A0A2R8YD78;C0IMW8	Sa1-IAA	-0.793359	0.530677	-1.49499	1	0.375317	0.805039	NA	0.571429	0	A0A2R8Y765	SWI/SNF-related matrix-associated actin-dependent regulator of chromatin subfamily E member 1	SMARCE1	ATP-dependent chromatin remodeling [GO:0043044]	SWI/SNF complex [GO:0016514]	DNA binding [GO:0003677]	NA	55
190	A0A2R8Y7S2;A7E2E1;A0A2R8Y4P4;Q9HBD4;B9EGQ8;P51532;A0A0A0MT49;A0A2R8YGG3;A0A2R8Y440;A0A2R8YG32;A0A2R8Y7F3;A0A2R8Y4C5;A0A2R8Y6N0;Q59FZ6;A0A2R8YGP5;A0A2R8Y6V2;A0A2R8YF58;A0A2R8Y526;A0A2R8Y7Y7;A0A2R8YF80;A0A2R8YDA1;B4E0F1;B4DSI8;B3KNW7;A0A2R8Y523;A5D6X0;A0A2R8Y5K3;A0A2R8YFK5;K7EQF0;K7EP28;A0A2R8YCY3;A0A2R8Y4R6;A0A2R8YFV8;A0A2R8Y7R0;A0A0U1RRF5;A0A2R8Y583;A0A2R8YF38;A0A2R8Y866;A0A0U1RQE1	Sa1-IAA	-0.535577	0.364375	-1.46985	7	0.185062	0.72394	NA	0.571429	0	A0A2R8Y7S2	Transcription activator BRG1	SMARCA4	ATP-dependent chromatin remodeling [GO:0043044]; regulation of transcription, DNA-templated [GO:0006355]	SWI/SNF complex [GO:0016514]	ATP binding [GO:0005524]; helicase activity [GO:0004386]; histone binding [GO:0042393]	NA	59
191	A0A2R8Y804;A0A2R8Y543;B4DL06;A0A2R8YCH5;B5BU28;A0A024R2Q3;A0A2R8Y5A3;P35222;B4DSW9;A0A2R8Y750;A0A2R8Y5Z1;B4DGU4;A0A2R8Y7Z0;A0A2R8Y5C3;A0A2R8Y6G0;A0A2R8YG06;A0A2R8Y815;G9GAG7	Sa1-IAA	0.341225	0.541217	0.630478	7	0.548404	0.868716	NA	0.52381	0	A0A2R8Y804	Catenin beta-1	CTNNB1	cell adhesion [GO:0007155]	adherens junction [GO:0005912]	cadherin binding [GO:0045296]	NA	30
192	A0A2R8Y811;P62263;E5RH77	Sa1-IAA	-0.00427503	0.547338	-0.00781059	6	0.994021	0.996403	NA	0.357143	0	A0A2R8Y811	40S ribosomal protein S14	RPS14	translation [GO:0006412]	ribosome [GO:0005840]	structural constituent of ribosome [GO:0003735]	NA	259
193	A0A2R8YEM3;E7EQV9;A0A024R2Q4;P61313;E7EX53;A0A2R8Y738;E7ENU7;B4DLP4;B4DEN1;Q96S84	Sa1-IAA	-0.286299	0.319717	-0.895478	7	0.400275	0.817982	NA	0.392857	0	A0A2R8YEM3	Ribosomal protein L15;60S ribosomal protein L15	RPL15	translation [GO:0006412]	ribosome [GO:0005840]	structural constituent of ribosome [GO:0003735]	NA	149
194	A0A2R8YH03;Q5VWN6;Q6IPC8;J3KPH3	Sa1-IAA	0.243075	0.429777	0.565583	7	0.589338	0.877134	NA	0.659341	0	A0A2R8YH03	Protein FAM208B	FAM208B	NA	NA	NA	NA	16
195	A0A2U3TZL8;H7BYN4;Q02241;H0YME6	Sa1-IAA	-0.00701662	0.622259	-0.0112761	5	0.991439	0.996403	NA	0.612245	0	A0A2U3TZL8	Kinesin-like protein;Kinesin-like protein KIF23	KIF23	actomyosin contractile ring assembly [GO:0000915]; plus-end-directed vesicle transport along microtubule [GO:0072383]	cytoplasm [GO:0005737]; microtubule [GO:0005874]	ATP binding [GO:0005524]; microtubule binding [GO:0008017]; microtubule motor activity [GO:0003777]	NA	46
196	A0A2X0SF83;Q5T5U3;B4DM37;E7ESW5;B7Z3A3;A0A1B0GV73;J3JSM9;A0A087WW76;A0A452Q6Z5	Sa1-IAA	0.802209	NA	NA	0	NA	NA	NA	0.714286	0	A0A2X0SF83	Rho GTPase-activating protein 21	ARHGAP21	signal transduction [GO:0007165]	NA	GTPase activator activity [GO:0005096]	NA	21
197	A0A2Z6ATB6;Q16643;B3KSQ7;D6R9W4;B7Z2Z0;D6R9Q9;D6RFI1;D6RCR4	Sa1-IAA	-0.1052	0.583398	-0.180322	5	0.86398	0.972373	NA	0.589286	0	A0A2Z6ATB6	Drebrin	DBN1	actin filament organization [GO:0007015]	NA	actin binding [GO:0003779]	NA	87
198	A0A384MDT2;P55795;B4DFK9;B4DP00	Sa1-IAA	0.086958	0.359616	0.241808	7	0.81586	0.962998	NA	0.690476	0	A0A384MDT2	Heterogeneous nuclear ribonucleoprotein H2	HNRNPH2	NA	nucleoplasm [GO:0005654]	RNA binding [GO:0003723]	NA	266
199	A0A384ME17;P49411	Sa1-IAA	#NAME?	NA	NA	NA	NA	0	oneConditionMissing	0.857143	0	A0A384ME17	Elongation factor Tu, mitochondrial	TUFM	response to ethanol [GO:0045471]	mitochondrion [GO:0005739]	GTPase activity [GO:0003924]; GTP binding [GO:0005525]; translation elongation factor activity [GO:0003746]	NA	139
200	A0A384MEJ3;G8JLB6;P31943;E9PCY7;D6RBM0;E7EN40;D6RIU0;E7EQJ0;D6RAM1;D6R9T0;D6RFM3;D6RIT2;D6RDU3;D6RJ04;D6RIH9;H0YB39;E5RGV0;D6RDL0;Q68DG4;H0YBD7;D6RF17;B4DP51;H0YBG7;D6R9D3;E5RGH4;E5RJ94;H0YAQ2	Sa1-IAA	-0.659857	0.463018	-1.42512	7	0.197147	0.731578	NA	0.301587	0	A0A384MEJ3	Heterogeneous nuclear ribonucleoprotein H;Heterogeneous nuclear ribonucleoprotein H, N-terminally processed	HNRNPH1	NA	nucleoplasm [GO:0005654]	RNA binding [GO:0003723]	NA	263
201	A0A384MQX1;P02545;W8QEH3;Q5I6Y5;Q3BDU5;Q8N519;Q5TCI8;B4DFR3;A0A0C4DGC5;H0YAB0;W5X314	Sa1-IAA	0.184497	0.393135	0.469297	7	0.653123	0.910148	NA	0.3769	0	A0A384MQX1	Prelamin-A/C;Lamin-A/C	LMNA	establishment or maintenance of microtubule cytoskeleton polarity [GO:0030951]; negative regulation of cardiac muscle hypertrophy in response to stress [GO:1903243]; negative regulation of extrinsic apoptotic signaling pathway [GO:2001237]; negative regulation of mesenchymal cell proliferation [GO:0072201]; negative regulation of release of cytochrome c from mitochondria [GO:0090201]; nuclear env…	lamin filament [GO:0005638]; nuclear membrane [GO:0031965]	NA	NA	92
202	A0A384MR33;Q14683;G8JLG1;Q6P2R1;A8K7A6;Q6MZR8;B7Z709;Q68EN4;H0Y7K8;Q5H934;V9GY57;Q7Z4C6;V9GYN9	Sa1-IAA	2.66681	0.539079	4.94696	6	0.0025858	0.409061	NA	0.495392	0	A0A384MR33	Structural maintenance of chromosomes protein 1A;Structural maintenance of chromosomes protein	SMC1A;DKFZp686L19178	DNA repair [GO:0006281]; meiotic cell cycle [GO:0051321]; mitotic sister chromatid cohesion [GO:0007064]; stem cell population maintenance [GO:0019827]	meiotic cohesin complex [GO:0030893]; nucleus [GO:0005634]	ATP binding [GO:0005524]; chromatin binding [GO:0003682]; mediator complex binding [GO:0036033]	NA	79
203	A0A384N5Z8;P23246;Q9BSV4;Q86VG2;Q6PIX2;H0Y9K7;H0Y9U2	Sa1-IAA	0.332148	0.311051	1.06783	3	0.363896	0.792452	NA	0.571429	0	A0A384N5Z8	Splicing factor, proline- and glutamine-rich	SFPQ	cellular response to DNA damage stimulus [GO:0006974]; histone H3 deacetylation [GO:0070932]; negative regulation of circadian rhythm [GO:0042754]; negative regulation of transcription, DNA-templated [GO:0045892]; positive regulation of sister chromatid cohesion [GO:0045876]	dendrite cytoplasm [GO:0032839]; nuclear speck [GO:0016607]; paraspeckles [GO:0042382]; RNA polymerase II transcription regulator complex [GO:0090575]	chromatin binding [GO:0003682]; E-box binding [GO:0070888]; RNA binding [GO:0003723]	NA	201
204	A0A384NL63;P51991;B4E3E6;B4DDB6;Q65ZQ3;B4E036;Q8NFG3;H7C1J8;Q66K53	Sa1-IAA	0.226189	1.10043	0.205546	6	0.843942	0.964066	NA	0.52381	0	A0A384NL63	Heterogeneous nuclear ribonucleoprotein A3	HNRNPA3;HNRPA3;D10S102	mRNA transport [GO:0051028]	cytoplasm [GO:0005737]; messenger ribonucleoprotein complex [GO:1990124]; neuron projection [GO:0043005]; nucleus [GO:0005634]; ribonucleoprotein granule [GO:0035770]; viral nucleocapsid [GO:0019013]	mRNA binding [GO:0003729]; RNA transmembrane transporter activity [GO:0051033]	NA	183
205	A0A384NLA7;A0A087X0L7;J3KNA0;Q2M1J6;Q15070;C9JC63;E7EVY0	Sa1-IAA	-0.191267	0.778764	-0.245604	2	0.828893	0.964066	NA	0.642857	0	A0A384NLA7	Mitochondrial inner membrane protein OXA1L	OXA1L	NA	integral component of membrane [GO:0016021]	membrane insertase activity [GO:0032977]	NA	5
206	A0A384P5S9;A0A024R889;Q13813;A0A0D9SF54;A0A0D9SGF6;B4DGT1;B4DTV8;Q9UG16;A0A1B0GTB7;A0A0D9SFF6;A0A1B0GW19;A0A1B0GWE2;A0A0D9SFH4;Q14917	Sa1-IAA	-0.153099	1.16743	-0.131142	1	0.916986	0.987887	NA	0.666667	0	A0A384P5S9	Spectrin alpha chain, non-erythrocytic 1	SPTAN1	actin filament capping [GO:0051693]	cell cortex [GO:0005938]; cytoskeleton [GO:0005856]	actin binding [GO:0003779]; calcium ion binding [GO:0005509]; calmodulin binding [GO:0005516]	NA	161
207	A0A3B3IRW6;Q2KHR3;H0YCQ7;Q9H6S7;B3KWV1	Sa1-IAA	-0.610966	0.440493	-1.38701	4	0.237724	0.751955	NA	0.642857	0	A0A3B3IRW6	Glutamine and serine-rich protein 1	QSER1	NA	NA	NA	NA	13
208	A0A3B3IS06;E7ETY2;B4DRA2;H0Y8Y7;Q9UFD4;A0A2R8Y857;B4DLB1;H0YA99	Sa1-IAA	-0.652908	1.67538	-0.389708	1	0.763431	0.944803	NA	0.785714	0	A0A3B3IS06	NA	TCOF1	NA	NA	NA	NA	103
209	A0A3B3IS53;A0A3F2YNX6;Q92794;A5PKX7;A5PLL3;A0A3B3ITI3;C9JJY6;A0A3B3ISU5;A0A3B3IRI4;A0A3B3IU93;A0A3B3ITI0;A0A3B3ISI1;Q712H5;A0A3B3ISZ3;Q712H6	Sa1-IAA	-0.936839	0.480689	-1.94895	5	0.108816	0.643394	NA	0.628571	0	A0A3B3IS53	Histone acetyltransferase KAT6A;Histone acetyltransferase	KAT6A;MYST3	animal organ development [GO:0048513]; histone H3 acetylation [GO:0043966]; nucleosome assembly [GO:0006334]; regulation of transcription, DNA-templated [GO:0006355]	host cell nucleus [GO:0042025]; MOZ/MORF histone acetyltransferase complex [GO:0070776]; nucleosome [GO:0000786]	DNA binding [GO:0003677]; histone acetyltransferase activity [GO:0004402]; metal ion binding [GO:0046872]; transcription coactivator activity [GO:0003713]	NA	1
210	A0A3B3ISJ3;Q9H8G2	Sa1-IAA	-0.178218	1.11763	-0.15946	1	0.899332	0.984803	NA	0.714286	0	A0A3B3ISJ3	Caspase activity and apoptosis inhibitor 1	CAAP1	regulation of apoptotic process [GO:0042981]	NA	NA	NA	12
211	A0A3B3IT15;P53621;A0A3B3IS84;A0A3B3IU89;A0A3B3ISC6;A0A3B3ITV3;A0A3B3ISK1;A0A3B3IS23;A0A3B3ITX2;A0A3B3ITI7	Sa1-IAA	-0.538933	0.692556	-0.77818	7	0.461951	0.838806	NA	0.542857	0	A0A3B3IT15	Coatomer subunit alpha;Xenin;Proxenin	COPA	intracellular protein transport [GO:0006886]; vesicle-mediated transport [GO:0016192]	COPI vesicle coat [GO:0030126]; Golgi membrane [GO:0000139]	structural molecule activity [GO:0005198]	NA	86
212	A0A3B3ITP0;A0A2R8Y7Y3;Q4VB86;A0A2R8YD30;Q1WWM3;Q59F12;A0A2U3TZH6;P11171;Q4VB87;Q29RX4;A0A2R8Y420;A0A2R8Y7N0;A0A2R8YFR9;A0A2R8Y6G5;A0A2R8YCW8;A0A2R8Y570;A0A2R8Y5G2;A0A2R8Y5Z6;A0A3B3IU06;A0A2R8Y6T6;A0A3B3ITC5;A0A2R8Y6D0;A0A3B3IUD6;B7Z5L2;A0A2R8Y4N6;A0A1B0GWG0;B7Z627;Q4VXN1;Q4VXN0;B3KUB6;B7Z653;A0A0C4DH22;Q9H4G0	Sa1-IAA	-0.264718	0.459748	-0.575789	4	0.595601	0.882596	NA	0.607143	0	A0A3B3ITP0	Protein 4.1	EPB41	cell cycle [GO:0007049]; cell division [GO:0051301]	cell cortex [GO:0005938]; cytoskeleton [GO:0005856]; nucleus [GO:0005634]	actin binding [GO:0003779]; calmodulin binding [GO:0005516]; structural molecule activity [GO:0005198]	NA	36
213	A0A3B3IUD7;Q14690;B4DH82;B4DES7;S4R3Q4	Sa1-IAA	-0.302186	0.222136	-1.36036	7	0.215896	0.734765	NA	0.58631	0	A0A3B3IUD7	Protein RRP5 homolog	PDCD11	mRNA processing [GO:0006397]; rRNA processing [GO:0006364]	nucleolus [GO:0005730]	nucleic acid binding [GO:0003676]	NA	38
214	A0A3F2YNY6;O75400;B4DPY2;Q05C41;F5H578;Q4ZG51;H7C2N3;F8VU11;Q6NWY9	Sa1-IAA	-0.102411	0.312086	-0.328151	5	0.756093	0.941025	NA	0.642857	0	A0A3F2YNY6	Pre-mRNA-processing factor 40 homolog A	PRPF40A	NA	NA	NA	NA	76
215	A0A3G2LMN0;Q9BW60;Q502X7	Sa1-IAA	-0.830924	0.491107	-1.69194	0	NA	NA	NA	0.571429	0	A0A3G2LMN0	Elongation of very long chain fatty acids protein 1;Elongation of very long chain fatty acids protein	ELOVL1	fatty acid elongation, monounsaturated fatty acid [GO:0034625]; fatty acid elongation, saturated fatty acid [GO:0019367]; long-chain fatty-acyl-CoA biosynthetic process [GO:0035338]; unsaturated fatty acid biosynthetic process [GO:0006636]; very long-chain fatty acid biosynthetic process [GO:0042761]	endoplasmic reticulum membrane [GO:0005789]; integral component of membrane [GO:0016021]	3-oxo-arachidoyl-CoA synthase activity [GO:0102336]; 3-oxo-cerotoyl-CoA synthase activity [GO:0102337]; 3-oxo-lignoceronyl-CoA synthase activity [GO:0102338]; fatty acid elongase activity [GO:0009922]; very-long-chain 3-ketoacyl-CoA synthase activity [GO:0102756]	NA	23
216	A0A494C001;A0A499FJY3;A0A087WWP4;Q96T37;Q59EY1	Sa1-IAA	-0.335128	0.315208	-1.0632	7	0.322989	0.783886	NA	0.489796	0	A0A494C001	Putative RNA-binding protein 15	RBM15	viral process [GO:0016032]	NA	RNA binding [GO:0003723]	NA	40
217	A0A494C017;C9JJV6;C9JZL8;A0A499FIY8;C9JC07;B4DG42;A0A024R4N0;Q96S97	Sa1-IAA	-0.0727027	0.52732	-0.137872	2	0.90297	0.984803	NA	0.285714	0	A0A494C017	Myeloid-associated differentiation marker	MYADM;hCG_1640809	NA	integral component of membrane [GO:0016021]	NA	NA	5
218	A0A494C0L2;F8W667;A0A499FI31;Q15020	Sa1-IAA	Inf	NA	NA	NA	NA	0	oneConditionMissing	0.714286	0	A0A494C0L2	Squamous cell carcinoma antigen recognized by T-cells 3	SART3	RNA processing [GO:0006396]	NA	NA	NA	59
219	A0A494C108;Q8N9T8;A0A024R7C4;B4DUY9;B7ZLF4;H0YFD2;F8WFC1;H0YH26	Sa1-IAA	-0.556853	0.651531	-0.854684	4	0.440895	0.828125	NA	0.571429	0	A0A494C108	Protein KRI1 homolog	KRI1;FLJ12949	NA	NA	NA	NA	38
220	A0A494C1F2;P35658;A0A024R8B6;Q7Z3C4;A0A0A0MSW3;A0A494BZU9;H0Y837;H0YF36;B4DZN4;E9PKD2;B7ZAV2;B4DYZ6;A0A494C104;B7ZAX0;H0YDS4	Sa1-IAA	-0.0749992	0.286021	-0.262216	7	0.800704	0.957282	NA	0.443609	0	A0A494C1F2	Nuclear pore complex protein Nup214	NUP214;DKFZp686J0330	NA	NA	NA	NA	49
221	A0A494C1G8;Q86TP0;Q8WWU2;Q8WWU3;A0A494C0Z6;Q59FX5;H0Y6K5;A0A494C070;H0Y7L6;B7ZLN9;Q02447	Sa1-IAA	0.278954	0.80019	0.348609	4	0.744958	0.941025	NA	0.357143	0	A0A494C1G8	Transcription factor Sp3	SP3	NA	nucleus [GO:0005634]	cis-regulatory region sequence-specific DNA binding [GO:0000987]; DNA-binding transcription factor activity [GO:0003700]	NA	0
222	A0A494C1S7;Q9Y5Q9;H7C0C0;H7BZV8	Sa1-IAA	-0.244481	0.373975	-0.653737	4	0.548958	0.868716	NA	0.6	0	A0A494C1S7	General transcription factor 3C polypeptide 3	GTF3C3	transcription by RNA polymerase III [GO:0006383]	NA	NA	NA	31
223	A0A499FIX8;H7BXI1;A0A087WXU3;A0FGR8	Sa1-IAA	-1.73053	0.218124	-7.93373	3	0.00417581	0.409061	NA	0.714286	0	A0A499FIX8	Extended synaptotagmin-2	ESYT2	endoplasmic reticulum-plasma membrane tethering [GO:0061817]; lipid transport [GO:0006869]	endoplasmic reticulum membrane [GO:0005789]; integral component of membrane [GO:0016021]; plasma membrane [GO:0005886]	lipid binding [GO:0008289]	NA	19
224	A0A499FJI4;O75592;H7C3U4;Q9UG08	Sa1-IAA	0.219696	0.557609	0.393997	0	NA	NA	NA	0.714286	0	A0A499FJI4	E3 ubiquitin-protein ligase MYCBP2	MYCBP2	protein ubiquitination [GO:0016567]	axon [GO:0030424]	metal ion binding [GO:0046872]	NA	6
225	A0A4D5RAC7;A0A4D5RAC9;Q6IPT9;Q6IPS9;Q6IPN6;Q53HR5;Q53HQ7;Q53HM9;Q53G85;Q5VTE0;P68104;A0A4D5RAN2;Q53GA1;A8K9C4;Q53GE9;A0A4D5RBG5;A0A4D5RA98;A0A4D5RA76;Q96RE1;A0A4D5RAE2;Q8IUB0;B4DV42;A0A087WVQ9;A0A4D5RA52;Q53HR1;B4DNE0;Q9NZS6;A0A087WV01;Q9H2I7;Q53G89;A0A4D5RAF1;A0A4D5RA61;Q504Z0;B4E2C5;A0A2U3TZH3;Q05639;A9X7H1;A0A4D5RBK4;Q6P4C9;A0A4D5RBI9;Q16577;A0A4D5RAB8;Q96C29;Q8TBL1;Q6P082;Q96CD8;A0A4D5RAR2;A0…	Sa1-IAA	0.440452	0.616706	0.714201	7	0.49822	0.858534	NA	0.412698	0	A0A4D5RAC7	Elongation factor 1-alpha;Putative elongation factor 1-alpha-like 3;Elongation factor 1-alpha 1;Elongation factor 1-alpha 2	EEF1A1;EEF1A1P5;EEF1A1L14;EEF1A2;PTI-1	NA	NA	GTPase activity [GO:0003924]; GTP binding [GO:0005525]	A0A4D5RAC7;A0A4D5RAC9;Q6IPT9;Q6IPS9;Q6IPN6;Q53HR5;Q53HQ7;Q53HM9;Q53G85;Q5VTE0;P68104;A0A4D5RAN2;Q53GA1;A8K9C4;Q53GE9;A0A4D5RBG5;A0A4D5RA98;A0A4D5RA76;Q96RE1;A0A4D5RAE2;Q8IUB0;B4DV42;A0A087WVQ9;A0A4D5RA52;Q53HR1;B4DNE0;Q9NZS6;A0A087WV01;Q9H2I7;Q53G89;A0A4D5RAF1;A0A4D5RA61;Q504Z0;B4E2C5;A0A2U3TZH3;Q05639;A9X7H1;A0A4D5RBK4;Q6P4C9;A0A4D5RBI9;Q16577;A0A4D5RAB8;Q96C29;Q8TBL1;Q6P082;Q96CD8;A0A4D5RAR2;A0…	350
226	A0A4D6WN96;A0A4D6WLI1;A0A024R1V5;P55198	Sa1-IAA	-0.659834	0.764979	-0.862552	2	0.479293	0.843656	NA	0.428571	0	A0A4D6WN96	NA	NA	NA	MLL1 complex [GO:0071339]	histone methyltransferase activity (H3-K4 specific) [GO:0042800]	NA	0
227	A0A4W8ZXM2;A0A5C2GVG6;S4R460;A0A0B4J2B5;A0A0F7TAG7;A0A5C2GNQ6;A0A5C2GF75;A0A5C2G6I9;A0A5C2GS36;A0A5C2GRN7;A0A5C2GR86;A0A5C2GQT7;A0A5C2GP23;A0A5C2GVM4;A0A5C2GMP8;A0A5C2GKN5;A0A5C2GF05;A0A5C2GAA1;A0A5C2G9W0;A0A5C2G6W7;A0A5C2GG66;Q9UL91;Q9UL72;A0A5C2GU90;A0A5C2GQV5;A0A5C2GQV0;A0A5C2GQA7;A0A5C2GP96;A0A5C2GNQ3;A0A5C2GNN5;A0A5C2GL02;A0A5C2GJN2;A0A5C2GH89;A0A5C2GGM9;A0A5C2GFH2;A0A5C2GE76;A0A5C2GB91;A0A5…	Sa1-IAA	NA	NA	NA	NA	NA	NA	NA	1	0	A0A4W8ZXM2	NA	IGHV3OR16-9;IGHV3-72	NA	NA	NA	NA	0
228	A0A590UJN4;A0A590UKB6;P24928;B4DET1;Q15161	Sa1-IAA	-0.492812	0.358224	-1.37571	6	0.21806	0.737887	NA	0.540816	0	A0A590UJN4	DNA-directed RNA polymerase II subunit RPB1	POLR2A	NA	NA	NA	NA	50
229	A0A590UJS4;Q6KC79;Q6IEH8;A8K2T2;A6QL62	Sa1-IAA	0.135968	0.241343	0.56338	5	0.597504	0.882897	NA	0.653061	0	A0A590UJS4	Nipped-B-like protein	NIPBL	cell cycle [GO:0007049]; regulation of gene expression [GO:0010468]	nucleus [GO:0005634]	chromatin binding [GO:0003682]	NA	25
230	A0A5C2FT85	Sa1-IAA	-1.05624	0.448521	-2.35494	4	0.0780928	0.618718	NA	0.285714	0	A0A5C2FT85	NA	NA	NA	NA	NA	NA	0
231	A0A5C2FX13;A0A5C2FW18;A0A5C2GRJ1;A0A5C2GTE2;A0A5C2GP92	Sa1-IAA	0.0658947	0.698151	0.0943846	6	0.927877	0.990127	NA	0	0	A0A5C2FX13	NA	NA	NA	NA	NA	A0A5C2FX13;A0A5C2FW18;A0A5C2GRJ1;A0A5C2GTE2;A0A5C2GP92	0
232	A0A5C2FY31	Sa1-IAA	Inf	NA	NA	NA	NA	0	oneConditionMissing	0.714286	0	A0A5C2FY31	NA	NA	NA	NA	NA	A0A5C2FY31	0
233	A0A5C2G1N5;A0A5C2FUJ9	Sa1-IAA	0.962668	1.04389	0.922193	6	0.392001	0.812707	NA	0.142857	0	A0A5C2G1N5	NA	NA	NA	NA	NA	A0A5C2G1N5;A0A5C2FUJ9	0
234	A0A5C2G1R6	Sa1-IAA	-1.278	0.34935	-3.65823	0	NA	NA	NA	0.714286	0	A0A5C2G1R6	NA	NA	NA	NA	NA	A0A5C2G1R6	0
235	A0A5C2G2K8;A0A5C2GSF5;A0A5C2FUR4;A0A5C2G636;A0A5C2G2Q0	Sa1-IAA	Inf	NA	NA	NA	NA	0	oneConditionMissing	0.714286	0	A0A5C2G2K8	NA	NA	NA	NA	NA	A0A5C2G2K8;A0A5C2GSF5;A0A5C2FUR4;A0A5C2G636;A0A5C2G2Q0	0
236	A0A5C2G5D4;A2MYD4;Q5NV90;A0A5C2GBW0;A0A5C2G3P5;A0A5C2GYE3;A0A5C2GSJ7;A0A5C2GLQ5;A0A5C2GK44;A0A5C2GJW2;A0A5C2G5E2;A0A5C2G4P4;A0A5C2G1C5;A0A5C2FXD4;A0A5C2GWI0;A0A5C2GW55;A0A5C2GMD3;A0A5C2GK40;A0A5C2GHQ8;A0A5C2GFW1;A0A5C2GCX8;A0A5C2G8F7;A0A5C2G6D6;A0A5C2G2W1;A0A5C2G0T8;A0A5C2FZJ7;A0A5C2FZB9;A0A5C2FZ98;A0A5C2FY21;A0A5C2FY02;A0A5C2FXW5;A0A5C2H0Z5;A0A5C2H087;A0A5C2GZD3;A0A5C2GZ08;A0A5C2GXW0;A0A5C2GXD8;…	Sa1-IAA	-0.0653697	0.64119	-0.101951	2	0.928097	0.990127	NA	0.5	0	A0A5C2G5D4	NA	V2-7;V2-17	NA	NA	NA	NA	0
237	A0A5C2G9P5;A0A5C2GM80;A0A5C2GAV3;A0A5C2GSQ9;A0A5C2GN36;A0A5C2GBI2;A0A5C2GGQ6;A0A5C2GLM1;A0A5C2G5N1;A0A5C2GFU8;A0A5C2GPI9;A0A5C2GFL1;A0A5C2G5A0;A0A5C2GA58;A0A5C2GHD7;A0A5C2G7Y2;A0A5C2GHI7	Sa1-IAA	0.17559	0.33967	0.516944	3	0.64089	0.903797	NA	0.142857	0	A0A5C2G9P5	NA	NA	NA	NA	NA	NA	0
238	A0A5C2GCS4;A0A5C2GXP5;A0A5C2FYQ7;A0A5C2FX06;A0A5C2FTY9;A0A5C2GW16;A0A5C2FY90;A0A5C2GP35;A0A5C2GIZ3;A0A5C2G232;A0A5C2H3U4;A0A5C2H0K9;A0A5C2GZT0;A0A5C2GZI8;A0A5C2GY24;A0A5C2GXL0;A0A5C2GX85;A0A5C2GW15;A0A5C2GVW9;A0A5C2GVT2;A0A5C2GV36;A0A5C2GUX4;A0A5C2GUW3;A0A5C2GUW0;A0A5C2GUN9;A0A5C2GUL1;A0A5C2GU71;A0A5C2GSB6;A0A5C2GS01;A0A5C2GRK1;A0A5C2GNC8;A0A5C2GLN8;A0A5C2GL14;A0A5C2GKV1;A0A5C2GKR4;A0A5C2GKC6;A0A…	Sa1-IAA	#NAME?	NA	NA	NA	NA	0	oneConditionMissing	0.857143	0	A0A5C2GCS4	Ig kappa chain V-III region B6	IGKV3D-20	NA	NA	NA	A0A5C2GCS4;A0A5C2GXP5;A0A5C2FYQ7;A0A5C2FX06;A0A5C2FTY9;A0A5C2GW16;A0A5C2FY90;A0A5C2GP35;A0A5C2GIZ3;A0A5C2G232;A0A5C2H3U4;A0A5C2H0K9;A0A5C2GZT0;A0A5C2GZI8;A0A5C2GY24;A0A5C2GXL0;A0A5C2GX85;A0A5C2GW15;A0A5C2GVW9;A0A5C2GVT2;A0A5C2GV36;A0A5C2GUX4;A0A5C2GUW3;A0A5C2GUW0;A0A5C2GUN9;A0A5C2GUL1;A0A5C2GU71;A0A5C2GSB6;A0A5C2GS01;A0A5C2GRK1;A0A5C2GNC8;A0A5C2GLN8;A0A5C2GL14;A0A5C2GKV1;A0A5C2GKR4;A0A5C2GKC6;A0A…	0
239	A0A5C2GEZ9;A0A5C2G6N4	Sa1-IAA	0.567161	0.637637	0.889474	7	0.403279	0.817982	NA	0	0	A0A5C2GEZ9	NA	NA	NA	NA	NA	A0A5C2GEZ9;A0A5C2G6N4	0
240	A0A5C2GFM4	Sa1-IAA	0.799512	0.65086	1.22839	3	0.306878	0.783886	NA	0.428571	0	A0A5C2GFM4	NA	NA	NA	NA	NA	NA	0
241	A0A5C2GK13;B7ZMG8;Q7Z3Y5;A0A087X0Q4;A0A5C2GM63;A0A5C2G1L1;A0A5C2GWX1;A0A5C2GWK8;A0A5C2GW49;A0A5C2GUF5;A0A5C2GLS3;A0A5C2GL20;A0A5C2GK16;A0A5C2GK11;A0A5C2GJI2;A0A5C2GJI1;A0A5C2GID7;A0A5C2GGX9;A0A5C2GGQ8;A0A5C2GBP1;A0A5C2G921;A0A5C2G5N4;A0A5C2G1G8;A0A5C2FYZ2;A0A5C2FXP5;A0A5C2FXI2;A0A5C2FX70;A0A5C2FUB0;A0A5C2H424;A0A5C2H411;A0A5C2H3Y3;A0A5C2H383;A0A5C2H1M0;A0A5C2H1A1;A0A5C2H143;A0A5C2H0X0;A0A5C2GZT5;…	Sa1-IAA	0.8668	0.591762	1.46478	6	0.193325	0.731578	NA	0	0	A0A5C2GK13	Ig kappa chain V-II region RPMI 6410;Ig kappa chain V-II region FR;Ig kappa chain V-II region Cum	VKA17;IGKV2-40;IGKV A18;IGKV2D-26;IGKV2D-30;IGKV2D-29;IGKV2D-28	NA	NA	NA	A0A5C2GK13;B7ZMG8;Q7Z3Y5;A0A087X0Q4;A0A5C2GM63;A0A5C2G1L1;A0A5C2GWX1;A0A5C2GWK8;A0A5C2GW49;A0A5C2GUF5;A0A5C2GLS3;A0A5C2GL20;A0A5C2GK16;A0A5C2GK11;A0A5C2GJI2;A0A5C2GJI1;A0A5C2GID7;A0A5C2GGX9;A0A5C2GGQ8;A0A5C2GBP1;A0A5C2G921;A0A5C2G5N4;A0A5C2G1G8;A0A5C2FYZ2;A0A5C2FXP5;A0A5C2FXI2;A0A5C2FX70;A0A5C2FUB0;A0A5C2H424;A0A5C2H411;A0A5C2H3Y3;A0A5C2H383;A0A5C2H1M0;A0A5C2H1A1;A0A5C2H143;A0A5C2H0X0;A0A5C2GZT5;…	0
242	A0A5C2GK36;A0A5C2G700	Sa1-IAA	0.827684	1.29873	0.637301	0	NA	NA	NA	0.714286	0	A0A5C2GK36	NA	NA	NA	NA	NA	A0A5C2GK36;A0A5C2G700	0
243	A0A5C2GQ54	Sa1-IAA	Inf	NA	NA	NA	NA	0	oneConditionMissing	0.714286	0	A0A5C2GQ54	NA	NA	NA	NA	NA	NA	0
244	A0A5C2GSC2;A0A5C2GJC6;A0A5C2GX42;A0A5C2GWR8	Sa1-IAA	#NAME?	NA	NA	NA	NA	0	oneConditionMissing	0.714286	0	A0A5C2GSC2	NA	NA	NA	NA	NA	A0A5C2GSC2;A0A5C2GJC6;A0A5C2GX42;A0A5C2GWR8	0
245	A0A5C2GTI9;A0A5C2GI02	Sa1-IAA	-0.523708	0.187755	-2.78931	1	0.219148	0.738449	NA	0.571429	0	A0A5C2GTI9	NA	NA	NA	NA	NA	NA	0
246	A0A5C2GTW1	Sa1-IAA	0.114874	0.00327344	35.0928	0	NA	NA	NA	0.571429	0	A0A5C2GTW1	NA	NA	NA	NA	NA	NA	0
247	A0A5C2GUL4;A0A5C2GDB6	Sa1-IAA	0.170703	1.19967	0.142291	2	0.89989	0.984803	NA	0.571429	0	A0A5C2GUL4	NA	NA	NA	NA	NA	NA	0
248	A0A5C2GWL6	Sa1-IAA	Inf	NA	NA	NA	NA	0	oneConditionMissing	0.857143	0	A0A5C2GWL6	NA	NA	NA	NA	NA	A0A5C2GWL6	0
249	A0A5C2GXC6;A0A5C2GUC7;A0A5C2H2D3;A0A5C2G8T3;A0A5C2FYY5;A0A5C2H0G6;A0A5C2GX20;A0A5C2G4Q0;A0A5C2G4F0;A0A5C2G1Y7;A0A5C2G1P8;A0A5C2G0Y7;A0A5C2G0X5;A0A5C2H1H7;A0A5C2H1B6;A0A5C2H117;A0A5C2GXF4;A0A5C2GWX5;A0A5C2GVQ3;A0A5C2GVA3;A0A5C2GU33;A0A5C2GTV4;A0A5C2GS93;A0A5C2GJF1;A0A5C2GIW2;A0A5C2GC08;A0A5C2GB47;A0A5C2GB17;A0A5C2G7V6;A0A5C2G4X2;A0A5C2G4G8;A0A5C2G3P0;A0A5C2G3C5;A0A5C2G0Z7;A0A5C2FYB8;A0A5C2FVJ0;A0A…	Sa1-IAA	1.66676	0.477943	3.48737	9	0.00685849	0.411913	NA	0	0	A0A5C2GXC6	NA	NA	NA	NA	NA	A0A5C2GXC6;A0A5C2GUC7;A0A5C2H2D3;A0A5C2G8T3;A0A5C2FYY5;A0A5C2H0G6;A0A5C2GX20;A0A5C2G4Q0;A0A5C2G4F0;A0A5C2G1Y7;A0A5C2G1P8;A0A5C2G0Y7;A0A5C2G0X5;A0A5C2H1H7;A0A5C2H1B6;A0A5C2H117;A0A5C2GXF4;A0A5C2GWX5;A0A5C2GVQ3;A0A5C2GVA3;A0A5C2GU33;A0A5C2GTV4;A0A5C2GS93;A0A5C2GJF1;A0A5C2GIW2;A0A5C2GC08;A0A5C2GB47;A0A5C2GB17;A0A5C2G7V6;A0A5C2G4X2;A0A5C2G4G8;A0A5C2G3P0;A0A5C2G3C5;A0A5C2G0Z7;A0A5C2FYB8;A0A5C2FVJ0;A0A…	0
250	A0A5C2GZN4;A0A5C2G047;A0A5C2GQ90	Sa1-IAA	NA	NA	NA	NA	NA	NA	completeMissing	1	0	A0A5C2GZN4	NA	NA	NA	NA	NA	A0A5C2GZN4;A0A5C2G047;A0A5C2GQ90	0
251	A0A5C2H2C4;A0A5C2GD99	Sa1-IAA	-0.157428	0.197019	-0.799047	0	NA	NA	NA	0.571429	0	A0A5C2H2C4	NA	NA	NA	NA	NA	A0A5C2H2C4;A0A5C2GD99	NA
252	A0MNN4;Q2TAY7	Sa1-IAA	#NAME?	NA	NA	NA	NA	0	oneConditionMissing	0.714286	0	A0MNN4	WD40 repeat-containing protein SMU1;WD40 repeat-containing protein SMU1, N-terminally processed	SMU1	NA	nucleus [GO:0005634]	NA	NA	38
253	A0PJ71;A8K1D3;A6H8Y5;O60934;E2QRP0;E5RGU1;A0A0C4DG07	Sa1-IAA	-0.128731	NA	NA	0	NA	NA	NA	0.714286	0	A0PJ71	Nibrin	NBN	double-strand break repair [GO:0006302]; meiotic cell cycle [GO:0051321]; mitotic G2 DNA damage checkpoint [GO:0007095]; telomere maintenance [GO:0000723]	chromosome, telomeric region [GO:0000781]; Mre11 complex [GO:0030870]	NA	NA	37
254	A1L3Z9;Q2TAL8;Q9NXG9;Q9H9Z1	Sa1-IAA	Inf	NA	NA	NA	NA	0	oneConditionMissing	0.809524	0	A1L3Z9	Glutamine-rich protein 1	QRICH1	NA	nucleoplasm [GO:0005654]	NA	NA	5
255	A2A2Y8;A0A3B3ITM2;B4DTI2;B4DT99;D3DRA2;Q9UMD9	Sa1-IAA	NA	NA	NA	NA	NA	NA	NA	0.857143	0	A2A2Y8	Collagen alpha-1(XVII) chain;120 kDa linear IgA disease antigen;97 kDa linear IgA disease antigen	COL17A1	NA	NA	NA	NA	2
256	A2RRC9;Q86VI3;F2Z2E2	Sa1-IAA	-0.281074	0.354399	-0.7931	2	0.510861	0.862131	NA	0.642857	0	A2RRC9	Ras GTPase-activating-like protein IQGAP3	IQGAP3	regulation of GTPase activity [GO:0043087]; signal transduction [GO:0007165]	NA	NA	NA	13
257	A2RUM7;P46777;A0A2R8Y6J3;B3KTM6;Q5T7N0;A0A2R8Y4A2;Q9BUV4;Q8WYP1;R4GNJ2	Sa1-IAA	-1.32634	0.454882	-2.91579	7	0.0224744	0.500978	NA	0.428571	0	A2RUM7	60S ribosomal protein L5	RPL5	translation [GO:0006412]	cytosol [GO:0005829]; endoplasmic reticulum [GO:0005783]; nucleolus [GO:0005730]; ribosome [GO:0005840]	5S rRNA binding [GO:0008097]; structural constituent of ribosome [GO:0003735]	NA	156
258	A2V663;Q70JA7	Sa1-IAA	1.14892	0.7643	1.50323	4	0.207207	0.731578	NA	0.142857	0	A2V663	Chondroitin sulfate synthase 3	ChSy-2;CHSY3	NA	Golgi cisterna membrane [GO:0032580]; integral component of membrane [GO:0016021]	acetylgalactosaminyltransferase activity [GO:0008376]	A2V663;Q70JA7	1
259	A3KMH1;B3KT81	Sa1-IAA	-0.0645352	0.199921	-0.322804	3	0.768034	0.945699	NA	0.571429	0	A3KMH1	von Willebrand factor A domain-containing protein 8	VWA8	NA	cytoplasm [GO:0005737]; mitochondrion [GO:0005739]; peroxisome [GO:0005777]	ATPase activity [GO:0016887]; ATP binding [GO:0005524]	NA	1
260	A3KPC7;A0A024RAS2;B2R5B3;A4FTV9;Q99878;Q96KK5;Q9BTM1;P0C0S8;B4E0B3;A0A0U1RR32;A0A0U1RRH7;P20671;H0YFX9;B2R5B6;A0A024R017;Q93077;Q08AJ9;Q7L7L0;P04908;A0A3B3IS11;Q96QV6;P16104;Q8IUE6;V9GZN0;A2RUA4;REV__H0Y672;REV__Q6N028;REV__E7EQ67;REV__Q6ZS45;REV__H7BY63	Sa1-IAA	-0.321841	1.13402	-0.283806	6	0.786098	0.95116	NA	0.380952	0	A3KPC7	Histone H2A;Histone H2A type 1-J;Histone H2A type 1-H;Histone H2A.J;Histone H2A type 1;Histone H2A type 1-D;Histone H2A type 1-C;Histone H2A type 3;Histone H2A type 1-B/E;Histone H2A type 1-A;Histone H2AX	HIST1H2AH;H2AFJ;HIST1H2AK;HIST1H2AJ;HIST1H2AG;HIST1H2AD;HIST1H2AC;HIST1H2AB;HIST3H2A;HIST1H2AA;H2AFX	NA	nucleosome [GO:0000786]; nucleus [GO:0005634]	DNA binding [GO:0003677]; protein heterodimerization activity [GO:0046982]	A3KPC7;A0A024RAS2;B2R5B3;A4FTV9;Q99878;Q96KK5;Q9BTM1;P0C0S8;B4E0B3;A0A0U1RR32;A0A0U1RRH7;P20671;H0YFX9;B2R5B6;A0A024R017;Q93077;Q08AJ9;Q7L7L0;P04908;A0A3B3IS11;Q96QV6;P16104;Q8IUE6;V9GZN0;A2RUA4;REV__H0Y672;REV__Q6N028;REV__E7EQ67;REV__Q6ZS45;REV__H7BY63	271
261	A4D218;Q9Y6D9;C9J9H5;C9JX80;C9JIR0;C9JJ38	Sa1-IAA	0.028445	0.365335	0.07786	4	0.941679	0.992212	NA	0.428571	0	A4D218	Mitotic spindle assembly checkpoint protein MAD1	MAD1L1	mitotic spindle assembly checkpoint [GO:0007094]	nucleus [GO:0005634]	NA	NA	2
262	A4LAA3;P46100;A0A096LNL9;B4DLE1;B4DHH8;A0A096LNW1;B7Z1D8;B4DLW1;A0A096LNN3;A0A096LP59;A0A068A261;A0A096LPG6;A0A096LNR8;Q86U63;Q5H9A3;A0A087WWG0;A0A096LNX6;A0A096LNL6	Sa1-IAA	0.283265	0.490338	0.577692	7	0.58157	0.877134	NA	0.428571	0	A4LAA3	Transcriptional regulator ATRX	ATRX	cellular response to hydroxyurea [GO:0072711]; chromosome organization involved in meiotic cell cycle [GO:0070192]; DNA damage response, signal transduction by p53 class mediator [GO:0030330]; DNA repair [GO:0006281]; forebrain development [GO:0030900]; meiotic spindle organization [GO:0000212]; multicellular organism growth [GO:0035264]; negative regulation of telomeric RNA transcription from RN…	condensed nuclear chromosome, centromeric region [GO:0000780]; nuclear body [GO:0016604]; nuclear chromosome, telomeric region [GO:0000784]; nuclear pericentric heterochromatin [GO:0031618]; nucleoplasm [GO:0005654]; PML body [GO:0016605]	ATP binding [GO:0005524]; chromatin binding [GO:0003682]; DNA helicase activity [GO:0003678]; histone binding [GO:0042393]; metal ion binding [GO:0046872]	NA	26
263	A4QPB0;A0A024RC65;P46940;A0A0J9YXZ5;Q6P1N4;H0YLE8;B4E2M0;B4DNP4;A0A087WWP1;Q5FWG8;Q05DN7	Sa1-IAA	0.186183	0.0297697	6.25412	1	0.100938	0.618718	NA	0.571429	0	A4QPB0	Ras GTPase-activating-like protein IQGAP1	IQGAP1;hCG_1991735	regulation of GTPase activity [GO:0043087]; signal transduction [GO:0007165]	NA	NA	NA	95
264	A5YKK6;B4DYL7;B3KPW6;H3BVC9;B3KS60;B7Z6X2;H3BMZ2;H3BNB1;H3BTH2;H3BR89;H3BMH0;B4DTM8	Sa1-IAA	-1.12794	0.711242	-1.58588	7	0.156787	0.684845	NA	0.549451	0	A5YKK6	CCR4-NOT transcription complex subunit 1	CNOT1	DNA damage response, signal transduction by p53 class mediator resulting in cell cycle arrest [GO:0006977]; gene silencing by miRNA [GO:0035195]; multicellular organism development [GO:0007275]; negative regulation of intracellular estrogen receptor signaling pathway [GO:0033147]; negative regulation of retinoic acid receptor signaling pathway [GO:0048387]; negative regulation of transcription by…	CCR4-NOT complex [GO:0030014]; CCR4-NOT core complex [GO:0030015]; cytosol [GO:0005829]; extracellular space [GO:0005615]; membrane [GO:0016020]; nucleus [GO:0005634]; P-body [GO:0000932]; peroxisomal membrane [GO:0005778]	armadillo repeat domain binding [GO:0070016]; estrogen receptor binding [GO:0030331]; molecular adaptor activity [GO:0060090]; protein domain specific binding [GO:0019904]; retinoic acid receptor binding [GO:0042974]; RNA binding [GO:0003723]	NA	44
265	A5YM43;Q8NDX5;H7C528;F8WDA4;H7C4H9	Sa1-IAA	0.458409	0.771599	0.594103	5	0.578302	0.877134	NA	0.642857	0	A5YM43	Polyhomeotic-like protein 3	PHC3	NA	nucleus [GO:0005634]	DNA binding [GO:0003677]; zinc ion binding [GO:0008270]	NA	14
266	A6NEM2;A0A223PQH6;P51610;Q05C05;H7C1C4	Sa1-IAA	-1.07385	0.24222	-4.43337	6	0.00440712	0.409061	NA	0.530612	0	A6NEM2	Host cell factor 1;HCF N-terminal chain 1;HCF N-terminal chain 2;HCF N-terminal chain 3;HCF N-terminal chain 4;HCF N-terminal chain 5;HCF N-terminal chain 6;HCF C-terminal chain 1;HCF C-terminal chain 2;HCF C-terminal chain 3;HCF C-terminal chain 4;HCF C-terminal chain 5;HCF C-terminal chain 6	HCFC1	NA	MLL1 complex [GO:0071339]; Set1C/COMPASS complex [GO:0048188]	NA	NA	72
267	A6NFI3	Sa1-IAA	-0.323604	0.250996	-1.28928	4	0.266804	0.774145	NA	0.285714	0	A6NFI3	Zinc finger protein 316	ZNF316	regulation of transcription, DNA-templated [GO:0006355]	nucleus [GO:0005634]	DNA binding [GO:0003677]; metal ion binding [GO:0046872]	NA	0
268	A6NHB5;Q14202;A6NHN7;A8K3Z7;A6NL54	Sa1-IAA	-0.231547	0.0786119	-2.94544	4	0.0421601	0.589366	NA	0.571429	0	A6NHB5	Zinc finger MYM-type protein 3	ZMYM3	NA	nucleoplasm [GO:0005654]	zinc ion binding [GO:0008270]	NA	23
269	A6NHQ2	Sa1-IAA	1.11795	1.70273	0.656567	3	0.558328	0.868983	NA	0.571429	0	A6NHQ2	rRNA/tRNA 2-O-methyltransferase fibrillarin-like protein 1	FBLL1	blastocyst hatching [GO:0001835]; box C/D snoRNA 3'-end processing [GO:0000494]; histone glutamine methylation [GO:1990258]; rRNA methylation [GO:0031167]	box C/D snoRNP complex [GO:0031428]; Cajal body [GO:0015030]; fibrillar center [GO:0001650]; nucleoplasm [GO:0005654]; small-subunit processome [GO:0032040]	histone-glutamine methyltransferase activity [GO:1990259]; RNA binding [GO:0003723]; rRNA methyltransferase activity [GO:0008649]	NA	0
270	A6NHR9;J3KTL8;A0A2R8YE92;A0A2R8YCU7;J3QSH1	Sa1-IAA	-0.405863	0.528155	-0.768456	6	0.47137	0.838806	NA	0.612245	0	A6NHR9	Structural maintenance of chromosomes flexible hinge domain-containing protein 1	SMCHD1	dosage compensation by inactivation of X chromosome [GO:0009048]; double-strand break repair [GO:0006302]; heterochromatin organization involved in chromatin silencing [GO:0070868]; inactivation of X chromosome by DNA methylation [GO:0060821]; inactivation of X chromosome by heterochromatin assembly [GO:0060820]; negative regulation of double-strand break repair via homologous recombination [GO:2…	Barr body [GO:0001740]; site of double-strand break [GO:0035861]	ATPase activity [GO:0016887]; ATP binding [GO:0005524]; DNA binding [GO:0003677]; protein homodimerization activity [GO:0042803]	NA	45
271	A6NJ78;A0A0U1RRF2;B5MC64;A0A0U1RR64;A0A0U1RRD2;F8WD83;A0A0U1RR76	Sa1-IAA	#NAME?	NA	NA	NA	NA	0	oneConditionMissing	0.857143	0	A6NJ78	Probable methyltransferase-like protein 15	METTL15	rRNA base methylation [GO:0070475]	mitochondrial matrix [GO:0005759]	rRNA (cytosine-N4-)-methyltransferase activity [GO:0071424]	NA	1
272	A6PVC9;A0A0S2Z518;B3KNE7;B3KQF0;A0A0S2Z5M1;Q9UGP8	Sa1-IAA	-0.599889	NA	NA	0	NA	NA	NA	0.714286	0	A6PVC9	Translocation protein SEC63 homolog	SEC63	posttranslational protein targeting to membrane, translocation [GO:0031204]	endoplasmic reticulum [GO:0005783]; integral component of membrane [GO:0016021]	NA	NA	11
273	A7BI36;Q9P2E9;A2A2S5;Q32NB1;A1A5C4;A0A087WVV2;F8W7S5;A1A5C5;V9GY78	Sa1-IAA	-0.216256	0.560121	-0.386088	5	0.715313	0.933932	NA	0.619048	0	A7BI36	Ribosome-binding protein 1	RRBP1	protein transport [GO:0015031]	integral component of endoplasmic reticulum membrane [GO:0030176]	NA	NA	58
274	A8CDT9;A0A087WY00;G3V394;F8WE88;F8W6H6;Q9Y4I1;B4E147;Q59FF5;G3V3C9;H0YM93;B4DVH2;B4E268	Sa1-IAA	Inf	NA	NA	NA	NA	0	oneConditionMissing	0.714286	0	A8CDT9	Unconventional myosin-Va	MYO5A	NA	myosin complex [GO:0016459]	actin filament binding [GO:0051015]; ATP binding [GO:0005524]; motor activity [GO:0003774]	NA	25
275	A8CG34;B4DET5;C9JER0;C9J370;A0A0J9YWR1;Q6PJE2;C9JFL1;B4DDR5;A8MY32;L0R526	Sa1-IAA	-0.0254551	0.320245	-0.0794863	7	0.93887	0.9913	NA	0.214286	0	A8CG34	Nuclear envelope pore membrane protein POM 121C	POM121C	intracellular transport of virus [GO:0075733]; mRNA export from nucleus [GO:0006406]; protein import into nucleus [GO:0006606]; protein sumoylation [GO:0016925]; regulation of cellular response to heat [GO:1900034]; regulation of gene silencing by miRNA [GO:0060964]; regulation of glycolytic process [GO:0006110]; RNA export from nucleus [GO:0006405]; tRNA export from nucleus [GO:0006409]; viral p…	endoplasmic reticulum membrane [GO:0005789]; host cell [GO:0043657]; integral component of membrane [GO:0016021]; nuclear envelope [GO:0005635]; nuclear membrane [GO:0031965]; nuclear pore [GO:0005643]	nuclear localization sequence binding [GO:0008139]; structural constituent of nuclear pore [GO:0017056]	NA	22
276	A8K124;B4DHL1;A0A024R5W1;Q6N043;Q9H740;H0YLA6;H0YL38	Sa1-IAA	Inf	NA	NA	NA	NA	0	oneConditionMissing	0.857143	0	A8K124	Zinc finger protein 280D	SUHW4;ZNF280D	NA	nucleus [GO:0005634]	NA	NA	NA
277	A8K2F4;Q96JM7;E9PLL7	Sa1-IAA	0.404693	0.270939	1.49367	3	0.232109	0.751955	NA	0.619048	0	A8K2F4	Lethal(3)malignant brain tumor-like protein 3	L3MBTL3	chromatin organization [GO:0006325]; regulation of transcription, DNA-templated [GO:0006355]	nucleus [GO:0005634]	zinc ion binding [GO:0008270]	NA	1
278	A8K2R3;O60341;R4GMQ1;R4GMP9	Sa1-IAA	0.604058	0.0346308	17.4428	0	NA	NA	NA	0.571429	0	A8K2R3	Lysine-specific histone demethylase 1A	KDM1A	histone H3-K4 demethylation [GO:0034720]; regulation of transcription, DNA-templated [GO:0006355]	nucleus [GO:0005634]	flavin adenine dinucleotide binding [GO:0050660]; oxidoreductase activity [GO:0016491]	NA	37
279	A8K321;B4DZ55;Q6ZXV5;F8VRY4	Sa1-IAA	1.34896	0.652927	2.06601	1	0.286979	0.783886	NA	0.761905	0	A8K321	Transmembrane and TPR repeat-containing protein 3	TMTC3	NA	endoplasmic reticulum [GO:0005783]; integral component of membrane [GO:0016021]	dolichyl-phosphate-mannose-protein mannosyltransferase activity [GO:0004169]	NA	0
280	A8K330;Q8IWA0;F8WE20;F8WC81;Q05D27	Sa1-IAA	-0.225443	0.445312	-0.506258	7	0.628227	0.895424	NA	0.659341	0	A8K330	WD repeat-containing protein 75	WDR75	NA	NA	NA	NA	15
281	A8K3C5;O95232;Q6PKC2;Q86Y74;J3KPP4;D6RDI2;B4DJ96;D6RHH0;U3KQT3;E7EN55;C9JL41	Sa1-IAA	-1.13444	0.584121	-1.94214	6	0.100145	0.618718	NA	0.464286	0	A8K3C5	Luc7-like protein 3	LUC7L3;CROP	mRNA splice site selection [GO:0006376]	U1 snRNP [GO:0005685]	mRNA binding [GO:0003729]	NA	122
282	A8K3R2;Q14137;B2RDN4;B4DEN9;Q4G0D9;Q6DKJ9;A0A075B729	Sa1-IAA	-0.778901	0.300184	-2.59474	7	0.0356973	0.58802	NA	0.547619	0	A8K3R2	Ribosome biogenesis protein BOP1	BOP1	maturation of 5.8S rRNA from tricistronic rRNA transcript (SSU-rRNA, 5.8S rRNA, LSU-rRNA) [GO:0000466]; maturation of LSU-rRNA from tricistronic rRNA transcript (SSU-rRNA, 5.8S rRNA, LSU-rRNA) [GO:0000463]	nucleolus [GO:0005730]; nucleoplasm [GO:0005654]; preribosome, large subunit precursor [GO:0030687]	ribonucleoprotein complex binding [GO:0043021]	NA	50
283	A8K3W4;A0A024R0J9;A0A0A0MRA5;B7Z4B8;Q9BUJ2;A8K6U7;A8K5K0;M0R3F1;M0QYZ0;M0R203;M0QZV6;M0R0K8;M0QYI8;B3KM60	Sa1-IAA	0.0766598	0.501763	0.152781	6	0.883579	0.982717	NA	0.52381	0	A8K3W4	Heterogeneous nuclear ribonucleoprotein U-like protein 1	HNRPUL1;HNRNPUL1	response to virus [GO:0009615]; RNA processing [GO:0006396]	viral nucleocapsid [GO:0019013]	NA	NA	106
284	A8K3Y5	Sa1-IAA	#NAME?	NA	NA	NA	NA	0	oneConditionMissing	0.857143	0	A8K3Y5	NA	NA	NA	cytoplasm [GO:0005737]; nucleus [GO:0005634]	DNA binding [GO:0003677]; metal ion binding [GO:0046872]	NA	0
285	A8K3Z5;Q8NFH5	Sa1-IAA	-0.4147	0.363437	-1.14105	2	0.372062	0.799738	NA	0.428571	0	A8K3Z5	Nucleoporin NUP53	NUP35	mRNA transport [GO:0051028]; protein transport [GO:0015031]	nuclear membrane [GO:0031965]; nuclear pore [GO:0005643]	nucleic acid binding [GO:0003676]; structural constituent of nuclear pore [GO:0017056]	NA	6
286	A8K492;P56192;H0YHL6;H0YI94;H0YI27;Q8NAB3;H0YIP0;H0YHV5;A0A024RBA2;B4E0E9;B4DF61	Sa1-IAA	-1.17159	NA	NA	0	NA	NA	NA	0.714286	0	A8K492	Methionine--tRNA ligase, cytoplasmic	MARS	methionyl-tRNA aminoacylation [GO:0006431]	cytoplasm [GO:0005737]	ATP binding [GO:0005524]; methionine-tRNA ligase activity [GO:0004825]	NA	107
287	A8K4B4;Q9BXS6;H0YMD2	Sa1-IAA	-0.283162	0.326679	-0.866789	4	0.434958	0.828125	NA	0.285714	0	A8K4B4	Nucleolar and spindle-associated protein 1	NUSAP1	establishment of mitotic spindle localization [GO:0040001]; mitotic cytokinesis [GO:0000281]	cytoplasm [GO:0005737]; microtubule [GO:0005874]; nucleus [GO:0005634]; spindle [GO:0005819]	NA	NA	19
288	A8K4M5;O60563;Q9NR57;A0A1W2PQ16	Sa1-IAA	0.0276223	0.322029	0.0857759	1	0.945527	0.99524	NA	0.714286	0	A8K4M5	Cyclin-T1	CCNT1	regulation of transcription by RNA polymerase II [GO:0006357]; transcription, DNA-templated [GO:0006351]	host cell nucleus [GO:0042025]; nucleus [GO:0005634]	cyclin-dependent protein serine/threonine kinase regulator activity [GO:0016538]	NA	36
289	A8K4P8;Q14146;Q6PCC8	Sa1-IAA	-0.397931	0.57077	-0.697183	5	0.516766	0.86386	NA	0.55102	0	A8K4P8	Unhealthy ribosome biogenesis protein 2 homolog	URB2	NA	NA	NA	NA	7
290	A8K4Z4;A0A024RBS2;P05388;Q6NSF2;F8VWS0;Q53HW2;Q53HK9;F8VU65;F8VPE8;G3V210;F8VW21;B4E3D5;Q8NHW5;F8VQY6;F8VRK7;F8VZS0;F8VWV4;F8VS58;F8W1K8;Q3MHV2	Sa1-IAA	-0.109664	0.521614	-0.210239	7	0.83947	0.964066	NA	0.527473	0	A8K4Z4	60S acidic ribosomal protein P0;60S acidic ribosomal protein P0-like	RPLP0;RPLP0P6	ribosome biogenesis [GO:0042254]	ribosome [GO:0005840]	NA	NA	206
291	A8K4Z6;Q9BRD0;H7C462	Sa1-IAA	-0.546317	0.344217	-1.58713	5	0.173345	0.716992	NA	0.595238	0	A8K4Z6	BUD13 homolog	BUD13	NA	NA	NA	NA	14
292	A8K517;P62266;D6RD47;D6RDJ2;D6RIX0;D6R9I7	Sa1-IAA	0.785637	0.127913	6.14197	1	0.102749	0.620751	NA	0.714286	0	A8K517	40S ribosomal protein S23	RPS23	translation [GO:0006412]	cytosol [GO:0005829]; endoplasmic reticulum [GO:0005783]; rough endoplasmic reticulum [GO:0005791]; small ribosomal subunit [GO:0015935]	structural constituent of ribosome [GO:0003735]	NA	160
293	A8K525;A0A0S2Z4Z9;Q15233;H7C367;C9JYS8;C9IZL7;C9J4X2;A0A0S2Z4E7;X6RDA4;A0A024RDP4;B4DWI8;Q8WXF1	Sa1-IAA	1.02242	0.499947	2.04506	3	0.133396	0.658061	NA	0.52381	0	A8K525	Non-POU domain-containing octamer-binding protein	NONO	NA	nuclear speck [GO:0016607]	RNA binding [GO:0003723]	NA	220
294	A8K548;Q8IZL8;C9JFV4;B4DR36;E7EV54;B4DEX7;O15451;I3L445;I3L4P1;I3L1P4;I3L4M7	Sa1-IAA	0.0930151	0.351175	0.264868	6	0.799975	0.957282	NA	0.585714	0	A8K548	Proline-, glutamic acid- and leucine-rich protein 1	PELP1	NA	cytoplasm [GO:0005737]; nucleus [GO:0005634]	NA	NA	37
295	A8K588;Q13247;A0A590UJK4;A0A590UK01;A0A590UJP7;Q59GY3;V9HVZ0;A0A590UK80;B5BU15	Sa1-IAA	-0.822073	0.480458	-1.71102	7	0.130815	0.658061	NA	0.450549	0	A8K588	Serine/arginine-rich splicing factor 6	SRSF6;HEL-S-91	NA	NA	RNA binding [GO:0003723]	NA	139
296	A8K5G0;A0A024R7K0;M0R2Z9;Q8IX01;M0R3F6;B4DSQ4;M0R216;M0R065	Sa1-IAA	-0.65742	0.56735	-1.15875	4	0.311022	0.783886	NA	0.657143	0	A8K5G0	SURP and G-patch domain-containing protein 2	SFRS14;SUGP2	mRNA processing [GO:0006397]; RNA splicing [GO:0008380]	nucleus [GO:0005634]	RNA binding [GO:0003723]	NA	37
297	A8K5H7;Q96I63;Q96TA2;Q9Y2Q2;Q9NQ51;Q5T8D1;R4GNA5;Q5T8D2	Sa1-IAA	1.37395	0.997381	1.37755	2	0.302239	0.783886	NA	0.809524	0	A8K5H7	ATP-dependent zinc metalloprotease YME1L1	YME1L1;FTSH	NA	membrane [GO:0016020]	ATP binding [GO:0005524]; metalloendopeptidase activity [GO:0004222]	NA	8
298	A8K5I0;A0A1U9X7W4;A0A0G2JIW1;P0DMV9;P0DMV8;B4DNT8;B4DI39;B4DWK5;Q59EJ3;B4DFN9;B4DVU9;B4E1S9;B4E388;B4E1T6;B4DNX1;V9GZ37;B3KTT5;B4DHP5;Q9UQC1;B4DNV4	Sa1-IAA	-0.0663451	0.511907	-0.129604	1	0.917949	0.987887	NA	0.571429	0	A8K5I0	Heat shock 70 kDa protein 1B;Heat shock 70 kDa protein 1A	HEL-S-103;HSPA1B;HSPA1A	NA	NA	ATP binding [GO:0005524]	NA	395
299	A8K644;Q08170;A0A0D9SEM4;Q53F45;Q59EF5;B4DEM8;A0A0D9SGD2	Sa1-IAA	-0.156794	0.986537	-0.158934	4	0.881423	0.982459	NA	0.142857	0	A8K644	Serine/arginine-rich splicing factor 4	SFRS4;SRSF4	mRNA processing [GO:0006397]; RNA splicing [GO:0008380]	nucleus [GO:0005634]	RNA binding [GO:0003723]	NA	131
300	A8K6I4;P42285;B4E3M6;H0YAC4;H0Y8U3	Sa1-IAA	0.0404434	0.366214	0.110436	5	0.916359	0.987887	NA	0.603175	0	A8K6I4	Superkiller viralicidic activity 2-like 2	SKIV2L2	RNA catabolic process [GO:0006401]	NA	ATP binding [GO:0005524]; RNA binding [GO:0003723]; RNA helicase activity [GO:0003724]	NA	66
301	A8K6Q4;P78332;E9PGM9;F8WCA5;B3KSK6;B4DNY1;C9JII0;C9JSL1;F8WF63	Sa1-IAA	-0.67095	0.552037	-1.21541	3	0.311134	0.783886	NA	0.428571	0	A8K6Q4	RNA-binding protein 6	RBM6	NA	NA	RNA binding [GO:0003723]	NA	25
302	A8K6V7;A0A024RDB2;A0A024RDE5;Q9UN86;D6RGJ4;D6RAC7;D6RB17;E5RH00;D6R9X5;D6R9A4;D6RBM9;D6REX8;D6RBR0;E5RI46;E5RIF8;D6RE13;D6RBW8;E5RH42;E5RIZ6;E5RJU8	Sa1-IAA	0.17929	0.681629	0.263031	5	0.803021	0.95893	NA	0.371429	0	A8K6V7	Ras GTPase-activating protein-binding protein 2	G3BP2	innate immune response [GO:0045087]; stress granule assembly [GO:0034063]	cytoplasmic stress granule [GO:0010494]	RNA binding [GO:0003723]	NA	59
303	A8K6X3;A0A0C4DG89;Q7L014;D3DQA6;D6RJA6;Q0VGL8;H0Y9U3	Sa1-IAA	0.0822961	0.228679	0.359876	7	0.729552	0.941025	NA	0.6875	0	A8K6X3	Probable ATP-dependent RNA helicase DDX46	DDX46	NA	NA	ATP binding [GO:0005524]; nucleic acid binding [GO:0003676]; RNA helicase activity [GO:0003724]	NA	125
304	A8K6X9;Q6PD62	Sa1-IAA	-0.686009	0.154379	-4.44366	4	0.0113019	0.468305	NA	0.55102	0	A8K6X9	RNA polymerase-associated protein CTR9 homolog	CTR9	histone modification [GO:0016570]; regulation of transcription, DNA-templated [GO:0006355]	NA	NA	NA	16
305	A8K7F6;P60842;J3QL43;J3QS69;J3KT12;E7EQG2;Q59F68;A8K088;Q14240;J3QLN6;J3QR64;J3KTB5;J3QKZ9;B4E102;B4E047;J3KS25;B4DNH2;Q9NZE6;J3KT04;J3KS93;E7EMV8;Q86WD0;J3KSN7;J3KTN0;Q96B07;B4DKP9;J3KSZ0;B4DJX6	Sa1-IAA	-0.834082	0.561934	-1.4843	1	0.377431	0.807794	NA	0.5	0	A8K7F6	Eukaryotic initiation factor 4A-I;Eukaryotic initiation factor 4A-II;Eukaryotic initiation factor 4A-II, N-terminally processed	EIF4A1;EIF4A2	NA	NA	ATP binding [GO:0005524]; RNA helicase activity [GO:0003724]; translation initiation factor activity [GO:0003743]	NA	190
306	A8K7G8;Q59FC5;B3KRI8;P49761;H3BRT8;B4DES4;H3BQR7;H3BV35;H3BRK0;B4DWU9;H3BUL5;H3BVF8;H3BQG1;H3BRW2;H3BNQ5;B3KTV2;B3KVF3;B3KUU7	Sa1-IAA	0.505047	0.188621	2.67758	2	0.115758	0.645842	NA	0.428571	0	A8K7G8	Dual specificity protein kinase CLK3	CLK3	NA	NA	ATP binding [GO:0005524]; protein serine/threonine kinase activity [GO:0004674]	NA	22
307	A8K800;Q9H7B2;Q5VXN0;B4DWS5;U3KQN5;Q5VXM9	Sa1-IAA	-0.654275	0.546494	-1.19722	6	0.27637	0.783886	NA	0.642857	0	A8K800	Ribosome production factor 2 homolog	RPF2	maturation of LSU-rRNA [GO:0000470]; ribosomal large subunit assembly [GO:0000027]	nucleolus [GO:0005730]	rRNA binding [GO:0019843]	NA	27
308	A8K8N3;Q96R06;K7ELG0;K7ELC8;E9PMD0	Sa1-IAA	-0.439016	0.469751	-0.934572	4	0.402917	0.817982	NA	0.428571	0	A8K8N3	Sperm-associated antigen 5	SPAG5	cell division [GO:0051301]; regulation of attachment of spindle microtubules to kinetochore [GO:0051988]	NA	NA	NA	31
309	A8K8Z3;Q9UKI8;Q53TE4;Q53TF9;B3KRP1;C9JWT6;F8W7X8	Sa1-IAA	-0.328251	0.449891	-0.729622	7	0.48931	0.851572	NA	0.428571	0	A8K8Z3	Serine/threonine-protein kinase tousled-like 1	TLK1	NA	NA	ATP binding [GO:0005524]; protein kinase activity [GO:0004672]	NA	0
310	A8K905;Q8WTT2;B4DXL4	Sa1-IAA	-1.22696	0.589858	-2.08009	7	0.076075	0.618718	NA	0.579832	0	A8K905	Nucleolar complex protein 3 homolog	NOC3L	NA	nucleolus [GO:0005730]	NA	NA	42
311	A8K940;Q66K74	Sa1-IAA	0.00994885	0.251505	0.0395573	3	0.970931	0.996403	NA	0.285714	0	A8K940	Microtubule-associated protein 1S;MAP1S heavy chain;MAP1S light chain	MAP1S	apoptotic process [GO:0006915]; microtubule cytoskeleton organization [GO:0000226]	microtubule [GO:0005874]	actin filament binding [GO:0051015]; microtubule binding [GO:0008017]	NA	6
312	A8K962;P17480;E9PKP7;O00164;B4DNQ1;B4DLB0;Q05BZ1;E9PMM2;Q9BQR2	Sa1-IAA	0.408874	0.414848	0.9856	6	0.36239	0.792452	NA	0.619048	0	A8K962	Nucleolar transcription factor 1	UBTF	NA	nucleus [GO:0005634]	DNA binding [GO:0003677]	NA	23
313	A8K9B9;A0A024R9N6;Q9H223;Q9NZN3	Sa1-IAA	0.381102	0.312713	1.21869	2	0.3472	0.790424	NA	0.714286	0	A8K9B9	EH domain-containing protein 4	EHD4	endocytic recycling [GO:0032456]	endosome membrane [GO:0010008]; plasma membrane [GO:0005886]	ATP binding [GO:0005524]; calcium ion binding [GO:0005509]; GTP binding [GO:0005525]	NA	3
314	A8K9F2;Q9Y2D9	Sa1-IAA	-0.409889	NA	NA	0	NA	NA	NA	0.714286	0	A8K9F2	Zinc finger protein 652	ZNF652	NA	NA	NA	NA	1
315	A8K9U0;Q9BWF3;E9PB51;E9PLB0;E9PM61;D6R9K7;U3KQD5;J3QRR5	Sa1-IAA	-0.635344	0.531527	-1.19532	2	0.354475	0.790424	NA	0.571429	0	A8K9U0	RNA-binding protein 4	RBM4	mRNA processing [GO:0006397]; RNA splicing [GO:0008380]	NA	RNA binding [GO:0003723]; zinc ion binding [GO:0008270]	NA	33
316	A8K9U6;Q7Z2W4;C9J6P4;A0A514C937;Q05DV5;H7C5K1	Sa1-IAA	0.283551	0.374097	0.757961	7	0.473214	0.838806	NA	0.410714	0	A8K9U6	Zinc finger CCCH-type antiviral protein 1	ZC3HAV1	NA	NA	metal ion binding [GO:0046872]; NAD+ ADP-ribosyltransferase activity [GO:0003950]	NA	58
317	A8KA74;P78316;E9PFK5;Q96GC8	Sa1-IAA	-0.750503	0.319741	-2.34722	6	0.0572753	0.618718	NA	0.669643	0	A8KA74	Nucleolar protein 14	NOP14	ribosome biogenesis [GO:0042254]	nucleolus [GO:0005730]; small-subunit processome [GO:0032040]	NA	NA	12
318	A8KAH1;P48651;J3KNR6;Q9BSY0	Sa1-IAA	-0.544308	0.599107	-0.908531	1	0.530487	0.868378	NA	0.571429	0	A8KAH1	Phosphatidylserine synthase 1	PTDSS1	phosphatidylserine biosynthetic process [GO:0006659]	endoplasmic reticulum membrane [GO:0005789]; integral component of membrane [GO:0016021]	L-serine-phosphatidylethanolamine phosphatidyltransferase activity [GO:0106245]	NA	5
319	A8MYI2;H0Y6F6;A0A0A0MRJ3;Q8NEY1	Sa1-IAA	-0.365373	0.0160058	-22.8276	0	NA	NA	NA	0.571429	0	A8MYI2	Neuron navigator 1	NAV1	neurogenesis [GO:0022008]	NA	NA	NA	1
320	A9X425;A9X424;F5H105;F5H8L7;E9PHB3;B4DQU6;D3DUR9;Q8TF68	Sa1-IAA	-0.296001	NA	NA	0	NA	NA	NA	0.714286	0	A9X425	Zinc finger protein 384	ZNF384	NA	NA	NA	NA	10
321	A9Z1X7;A0A0S2Z4Z6;A0A0S2Z4W1;Q8IYB3;E9PCT1;M0R088;B4DED5;M0R1E7;M0QXG5	Sa1-IAA	0.262974	1.18009	0.222842	6	0.831051	0.964066	NA	0.571429	0	A9Z1X7	Serine/arginine repetitive matrix protein 1	SRRM1	mRNA processing [GO:0006397]	nuclear speck [GO:0016607]	NA	NA	79
322	B0QXZ6;O95503;B3KT27	Sa1-IAA	-0.0583007	1.10134	-0.0529363	2	0.962595	0.996403	NA	0.571429	0	B0QXZ6	Chromobox protein homolog 6	CBX6	NA	nucleus [GO:0005634]	NA	NA	0
323	B0QYK0;Q01844;H7BY36;A0A0D9SFL3;C9JGE3;A9Z0R7;Q71E78;C3UMV4;F1JVV5;C3UMV3;C3UMV2	Sa1-IAA	-0.261388	0.413776	-0.631714	6	0.550868	0.868716	NA	0.392857	0	B0QYK0	RNA-binding protein EWS	EWSR1	regulation of transcription, DNA-templated [GO:0006355]	nucleolus [GO:0005730]; nucleoplasm [GO:0005654]	metal ion binding [GO:0046872]; RNA binding [GO:0003723]	NA	143
324	B0QYV1;A0A0G2JRA5;O43251;A0A0G2JRD1;S4R3K7;S4R469;B0QYY4;F8WSN4;Q8TCM0;F8VR27;F8VZY7;Q59HD3;X5DP44;B7ZLH9;A0A087X2B1;X5D7T5;J3KNW3;X5DNY3;B7Z1U7;F8VZG9;A0A286YEU2;Q9NWB1;I3L1D4;A0A0G2JSB3;B0QYY7;A0A3B3ITL7;J3QRF4;F8VRS4;A6NFN3;B0QYY6;J3QQZ2;F5H0M1;B7Z608	Sa1-IAA	0.191913	0.255122	0.752241	3	0.506547	0.861454	NA	0.285714	0	B0QYV1	RNA binding protein fox-1 homolog;RNA binding protein fox-1 homolog 2;RNA binding protein fox-1 homolog 1	RBFOX2;DKFZp547L059;RBFOX1;A2BP1	mRNA processing [GO:0006397]; regulation of RNA splicing [GO:0043484]; RNA splicing [GO:0008380]	cytosol [GO:0005829]; nucleoplasm [GO:0005654]	RNA binding [GO:0003723]	NA	14
325	B0S7P4;A0A1U9X819;Q9Y676;A0A0G2JIC6;B4DFG6	Sa1-IAA	-0.706508	0.0038995	-181.179	0	NA	NA	NA	0.785714	0	B0S7P4	28S ribosomal protein S18b, mitochondrial	MRPS18B	mitochondrial translation [GO:0032543]	cell junction [GO:0030054]; mitochondrion [GO:0005739]; nucleoplasm [GO:0005654]; ribosome [GO:0005840]	structural constituent of ribosome [GO:0003735]	NA	27
326	B0UZZ8;A0A1U9X8U7;A0A1U9X8U3;O15213;B4DP15;A0A1U9X8W1;A8K9A1;A8K806;B4DNI0;A0A140T9L0;A0A0G2JJL1;H0Y6G3	Sa1-IAA	-0.832246	0.340357	-2.44522	7	0.0444178	0.604674	NA	0.561224	0	B0UZZ8	WD repeat-containing protein 46	C6orf11;WDR46	NA	collagen trimer [GO:0005581]; nucleolus [GO:0005730]; ribosome [GO:0005840]	NA	NA	5
327	B0ZBD0;Q8WVX7;P39019;A0A075B6E2;M0R2L9;M0QYF7;M0R140	Sa1-IAA	1.75039	1.80672	0.968824	2	0.434838	0.828125	NA	0.642857	0	B0ZBD0	40S ribosomal protein S19	RPS19	Notch signaling pathway [GO:0007219]; translation [GO:0006412]	nucleoplasm [GO:0005654]; ribosome [GO:0005840]	structural constituent of ribosome [GO:0003735]	NA	181
328	B1AKC8;B3KR52;Q9NUA8;A0A3B3IRZ6;Q1RMZ5;F8WAI8	Sa1-IAA	-0.686711	0.279964	-2.45285	4	0.0702292	0.618718	NA	0.619048	0	B1AKC8	Zinc finger and BTB domain-containing protein 40	ZBTB40	NA	NA	NA	NA	2
329	B1ANR0;Q6IQ30;Q13310;H0Y5F5;Q15164;H0YEU6;Q147Y3;Q3B867;Q53GL4;B1ANR1;Q59GZ7;H0YEQ8;Q5JQF8	Sa1-IAA	-0.00816736	0.232211	-0.0351722	4	0.973628	0.996403	NA	0.642857	0	B1ANR0	Polyadenylate-binding protein;Polyadenylate-binding protein 4	PABPC4	NA	cytosol [GO:0005829]	RNA binding [GO:0003723]	NA	142
330	B1APM4;P35610	Sa1-IAA	-0.509957	0.573341	-0.889447	4	0.424022	0.823824	NA	0.607143	0	B1APM4	Sterol O-acyltransferase 1	SOAT1	NA	endoplasmic reticulum [GO:0005783]; endoplasmic reticulum membrane [GO:0005789]; integral component of membrane [GO:0016021]	O-acyltransferase activity [GO:0008374]	NA	5
331	B1Q2B0;Q6ZNB6;Q8J028	Sa1-IAA	-0.737973	0.380292	-1.94054	5	0.109995	0.644175	NA	0.428571	0	B1Q2B0	NF-X1-type zinc finger protein NFXL1	URCC5;NFXL1;HOZFP	NA	integral component of membrane [GO:0016021]; nucleus [GO:0005634]	DNA-binding transcription factor activity [GO:0003700]; zinc ion binding [GO:0008270]	NA	6
332	B2CIS9;P31944;A9UFC0	Sa1-IAA	0.206451	1.20823	0.170871	1	0.892261	0.984803	NA	0.714286	0	B2CIS9	Caspase-14;Caspase-14 subunit p17, mature form;Caspase-14 subunit p10, mature form;Caspase-14 subunit p20, intermediate form;Caspase-14 subunit p8, intermediate form	CASP14	cornification [GO:0070268]	cytosol [GO:0005829]; keratin filament [GO:0045095]; mitochondrion [GO:0005739]; nucleoplasm [GO:0005654]	cysteine-type endopeptidase activity [GO:0004197]	NA	53
333	B2R4C1;P62899;H7C2W9;C9JU56;B7Z4E3;B7Z4C8;Q76N53;B8ZZK4	Sa1-IAA	0.0925273	0.484769	0.190869	4	0.857925	0.970933	NA	0.571429	0	B2R4C1	60S ribosomal protein L31	RPL31	translation [GO:0006412]	ribosome [GO:0005840]	structural constituent of ribosome [GO:0003735]	NA	170
334	B2R4R0;P62805;Q0VAS5;Q6B823	Sa1-IAA	0.295442	0.649026	0.455207	8	0.66106	0.912563	NA	0.384615	0	B2R4R0	Histone H4	HIST1H4H;HIST1H4A	DNA-templated transcription, initiation [GO:0006352]	host cell nucleus [GO:0042025]; nucleosome [GO:0000786]; nucleus [GO:0005634]	DNA binding [GO:0003677]; protein heterodimerization activity [GO:0046982]	B2R4R0;P62805;Q0VAS5;Q6B823	225
335	B2R4S9;A0A024RCL8;A0A024RCJ9;A0A024QZZ7;I6L9F7;U3KQK0;B4DR52;Q99880;Q99879;Q99877;Q93079;Q5QNW6;P62807;P58876;P57053;O60814;Q0D2M2;A8K9J7;Q96A08	Sa1-IAA	0.0327635	0.524776	0.0624333	6	0.952246	0.99615	NA	0.5	0	B2R4S9	Histone H2B;Histone H2B type 1-L;Histone H2B type 1-M;Histone H2B type 1-N;Histone H2B type 1-H;Histone H2B type 2-F;Histone H2B type 1-C/E/F/G/I;Histone H2B type 1-D;Histone H2B type F-S;Histone H2B type 1-K	HIST1H2BI;HIST1H2BK;HIST1H2BN;HIST1H2BD;HIST1H2BM;HIST1H2BL;HIST1H2BH;HIST2H2BF;HIST1H2BC;H2BFS	antibacterial humoral response [GO:0019731]; antimicrobial humoral immune response mediated by antimicrobial peptide [GO:0061844]; defense response to Gram-positive bacterium [GO:0050830]; innate immune response in mucosa [GO:0002227]	cytosol [GO:0005829]; extracellular space [GO:0005615]; nucleoplasm [GO:0005654]; nucleosome [GO:0000786]	DNA binding [GO:0003677]; protein heterodimerization activity [GO:0046982]	NA	227
336	B2R5V9;A0A024R4E5;Q00341;B4DKR8;Q6ZS03;Q96CF6;H0Y394;C9JMQ6;C9JQ82;C9JBS3;C9JEJ8;C9JHN6;C9JT62;C9JHS7;C9JK79;C9JHZ8;C9JES8;C9JZI8;C9J5E5;C9JIZ1;Q2HJC8;C9JHS9;C9J739	Sa1-IAA	-0.402468	0.241153	-1.66893	0	NA	NA	NA	0.571429	0	B2R5V9	Vigilin	HDLBP	NA	NA	RNA binding [GO:0003723]	NA	71
337	B2R5W3;A0A024R3T8;P09874;B4E0E1;Q05D33;Q6PJL0;Q96P95;Q5VX84;Q5VX85	Sa1-IAA	-0.804306	0.538983	-1.49227	7	0.179261	0.720574	NA	0.544643	0	B2R5W3	Poly [ADP-ribose] polymerase 1	PARP1	DNA repair [GO:0006281]; protein ADP-ribosylation [GO:0006471]	chromosome [GO:0005694]; nucleus [GO:0005634]	DNA binding [GO:0003677]; NAD+ ADP-ribosyltransferase activity [GO:0003950]; NAD binding [GO:0051287]; zinc ion binding [GO:0008270]	NA	182
338	B2R6F3;P84103;A0A087X2D0	Sa1-IAA	-0.316052	1.05803	-0.298716	5	0.777173	0.949625	NA	0.678571	0	B2R6F3	Serine/arginine-rich splicing factor 3	SFRS3;SRSF3	cellular response to leukemia inhibitory factor [GO:1990830]	nuclear speck [GO:0016607]	phospholipase binding [GO:0043274]; sequence-specific mRNA binding [GO:1990825]	NA	197
339	B2R6H3;Q8NI77;Q4G194	Sa1-IAA	-1.02913	0.362933	-2.8356	4	0.0470771	0.615638	NA	0.52381	0	B2R6H3	Kinesin-like protein;Kinesin-like protein KIF18A	KIF18A	microtubule-based movement [GO:0007018]	cytoplasm [GO:0005737]; microtubule [GO:0005874]	ATP binding [GO:0005524]; microtubule binding [GO:0008017]; microtubule motor activity [GO:0003777]	NA	10
340	B2R7C5;A0A0S2Z4T1;P25205;Q53HJ4;A0A0S2Z492;J3KQ69;B4DUQ9;A0A499FHX9;Q8NHX6;B4DS46;Q7Z6P5	Sa1-IAA	0.219627	0.272081	0.807212	7	0.446101	0.828125	NA	0.602041	0	B2R7C5	DNA helicase;DNA replication licensing factor MCM3	MCM3;HCC5	cell cycle [GO:0007049]; DNA replication initiation [GO:0006270]	MCM complex [GO:0042555]; nucleus [GO:0005634]	ATP binding [GO:0005524]; DNA binding [GO:0003677]; DNA helicase activity [GO:0003678]	NA	120
341	B2R8R5;Q13263;M0R0K9;M0R3C0;M0R2I3	Sa1-IAA	-0.304626	0.386997	-0.787153	7	0.457011	0.834038	NA	0.372671	0	B2R8R5	Transcription intermediary factor 1-beta	TRIM28	NA	nucleus [GO:0005634]	transcription corepressor activity [GO:0003714]; zinc ion binding [GO:0008270]	NA	177
342	B2R8Y6;Q6MZP3;Q8N3U4;Q6MZM4;Q6MZM3;Q6AI02;B4DQ46;B1AMT4;B1AMT0;B1AMT1;B1AMT2;C9J3T3;B1AMT3;B4DYS8;B2RU25;A8K8M9;D6W5U7;Q9UJ98	Sa1-IAA	Inf	NA	NA	NA	NA	0	oneConditionMissing	0.785714	0	B2R8Y6	Cohesin subunit SA-2	DKFZp686I05169;STAG2;DKFZp686P16143;DKFZp686C21148;DKFZp686P168	NA	chromosome [GO:0005694]	NA	NA	26
343	B2R9I9;A0MNP2;Q96DI7	Sa1-IAA	-1.83905	0.714937	-2.57232	0	NA	NA	NA	0.571429	0	B2R9I9	U5 small nuclear ribonucleoprotein 40 kDa protein	WDR57;SNRNP40	NA	NA	NA	NA	71
344	B2RA56;Q969V3;K7EMW4;K7ENM2;K7ELZ9;A0A0C4DGP7	Sa1-IAA	0.565585	0.690855	0.818675	3	0.47295	0.838806	NA	0.571429	0	B2RA56	Nicalin	NCLN	regulation of signal transduction [GO:0009966]	integral component of membrane [GO:0016021]	NA	NA	6
345	B2RA91;F8VXG7;Q99590;Q05BS8;A0A0A0MTP7;B4DZM2	Sa1-IAA	-1.05947	0.532693	-1.9889	7	0.0870327	0.618718	NA	0.650794	0	B2RA91	Protein SCAF11	SCAF11	NA	NA	NA	NA	45
346	B2RAH5;O14974;A0A024RBF1;H0YHI8;A0A3B3ISH4;F8VZN8;H0YIS4;H0YIM2;H0YIS3;F8VW28;A0A0U1RQZ1;H0YIL7;H0YHL8	Sa1-IAA	-0.742719	0.666814	-1.11383	5	0.31601	0.783886	NA	0.619048	0	B2RAH5	Protein phosphatase 1 regulatory subunit;Protein phosphatase 1 regulatory subunit 12A	PPP1R12A	signal transduction [GO:0007165]	cytoplasm [GO:0005737]	phosphatase regulator activity [GO:0019208]; protein kinase binding [GO:0019901]	NA	55
347	B2RAN0;P54132;H0YNU5;A0A3B3IT82;B7Z2X2;B7ZKN7;B7Z8C1;Q3B7X0;H0YLV8	Sa1-IAA	-0.428521	0.28599	-1.49838	6	0.184688	0.72394	NA	0.636364	0	B2RAN0	Bloom syndrome protein	BLM	DNA recombination [GO:0006310]; DNA repair [GO:0006281]; DNA replication [GO:0006260]	nucleus [GO:0005634]	3'-5' DNA helicase activity [GO:0043138]; ATP binding [GO:0005524]; DNA binding [GO:0003677]; metal ion binding [GO:0046872]	NA	21
348	B2RAQ8;A0A024R5F4;P50416;H3BP22;H3BUV7	Sa1-IAA	-0.526342	0.314151	-1.67544	7	0.137755	0.663432	NA	0.542857	0	B2RAQ8	Carnitine O-palmitoyltransferase 1, liver isoform	CPT1A	fatty acid beta-oxidation [GO:0006635]	integral component of membrane [GO:0016021]; mitochondrial outer membrane [GO:0005741]	carnitine O-palmitoyltransferase activity [GO:0004095]	NA	8
349	B2RAX6;Q9Y5J1;J3KSR7;J3QR85;F6VJE8	Sa1-IAA	-0.325876	0.50557	-0.64457	7	0.539746	0.868716	NA	0.547619	0	B2RAX6	U3 small nucleolar RNA-associated protein 18 homolog	UTP18	NA	NA	NA	NA	26
350	B2RBA0;O95391;A0A0C4DGD2;E5RGM7;E5RK41	Sa1-IAA	-0.285529	0.161268	-1.77052	5	0.136856	0.662227	NA	0.666667	0	B2RBA0	Pre-mRNA-splicing factor SLU7	SLU7	mRNA splicing, via spliceosome [GO:0000398]	spliceosomal complex [GO:0005681]	pre-mRNA 3'-splice site binding [GO:0030628]; second spliceosomal transesterification activity [GO:0000386]	NA	45
351	B2RBA6;A0A0S2Z4A5;P33993;C6EMX8;B3KUD7;B4DDF5;Q9H4N9;A0A0S2Z441;C9J8M6	Sa1-IAA	-0.367512	0.852288	-0.431206	6	0.681381	0.920648	NA	0.571429	0	B2RBA6	DNA helicase;DNA replication licensing factor MCM7	MCM7	cell cycle [GO:0007049]; DNA replication initiation [GO:0006270]	MCM complex [GO:0042555]; nucleus [GO:0005634]	ATP binding [GO:0005524]; DNA binding [GO:0003677]; DNA helicase activity [GO:0003678]	NA	123
352	B2RBR9;Q14974;B7Z5M1;J3KTM9;J3QR48;B7Z752;J3QKQ5;J3KS06	Sa1-IAA	0.0126472	0.485632	0.0260428	4	0.980471	0.996403	NA	0.428571	0	B2RBR9	Importin subunit beta-1	KPNB1	protein import into nucleus [GO:0006606]	cytoplasm [GO:0005737]	Ran GTPase binding [GO:0008536]	NA	161
353	B2RCW4;A8K251;Q9HC78	Sa1-IAA	0.584462	0.200673	2.91251	1	0.210553	0.731578	NA	0.642857	0	B2RCW4	Zinc finger and BTB domain-containing protein 20	ZBTB20	NA	NA	NA	NA	1
354	B2RD09;Q96P11;Q63ZY6	Sa1-IAA	#NAME?	NA	NA	NA	NA	0	oneConditionMissing	0.714286	0	B2RD09	Probable 28S rRNA (cytosine-C(5))-methyltransferase;Putative methyltransferase NSUN5C	NSUN5;NSUN5P2	methylation [GO:0032259]	NA	methyltransferase activity [GO:0008168]; RNA binding [GO:0003723]	NA	9
355	B2RDT9	Sa1-IAA	-0.226667	0.92347	-0.245452	0	NA	NA	NA	0.714286	0	B2RDT9	NA	NA	cell cycle [GO:0007049]; cell division [GO:0051301]	chromosome [GO:0005694]; nuclear speck [GO:0016607]; spliceosomal complex [GO:0005681]	nucleic acid binding [GO:0003676]; zinc ion binding [GO:0008270]	NA	0
356	B2RDX4;A8K8Y8;Q9BRR8	Sa1-IAA	#NAME?	NA	NA	NA	NA	0	oneConditionMissing	0.857143	0	B2RDX4	G patch domain-containing protein 1	GPATCH1	mRNA processing [GO:0006397]	NA	RNA binding [GO:0003723]	NA	45
357	B2RE34;A0A024R136;A0A2X0U4T9;Q9H0H5;F8VRD2;F8W1E5;F8VVY0;F8VXH1;F8VUW9;F8VV39;F8VS54;F8VWX0;F8W1T4;F8W0L1;F8VZ66;F8VV37;F8VV47;F8VWY4;F8VVE5;Q9H9L9;H0YIK5;Q9BZ74	Sa1-IAA	-0.0833412	0.774738	-0.107573	3	0.921125	0.987887	NA	0.214286	0	B2RE34	Rac GTPase-activating protein 1	RACGAP1	intracellular signal transduction [GO:0035556]	NA	NA	NA	35
358	B2RE46;P04844;B4DJL0;Q5JYR3;Q5JYR4;Q5JYR7;H0Y5M1;F2Z3K5	Sa1-IAA	-0.458099	0.327077	-1.40058	7	0.204074	0.731578	NA	0.52381	0	B2RE46	Dolichyl-diphosphooligosaccharide--protein glycosyltransferase subunit 2	RPN2	protein N-linked glycosylation [GO:0006487]	integral component of membrane [GO:0016021]; oligosaccharyltransferase complex [GO:0008250]	NA	NA	82
359	B2RMQ4;Q8WWK9;C9J7Y4	Sa1-IAA	-0.737247	0.65907	-1.11862	4	0.325942	0.783886	NA	0.5	0	B2RMQ4	Cytoskeleton-associated protein 2	CKAP2	NA	cytoplasm [GO:0005737]	NA	NA	40
360	B2RN10;Q9UPN4;I3L2J8;I3L2X7;I3L4M5;I3L316;REV__Q96RV0	Sa1-IAA	0.443739	0.397643	1.11592	7	0.301292	0.783886	NA	0.493088	0	B2RN10	Centrosomal protein of 131 kDa	AZI1;CEP131	intraciliary transport involved in cilium assembly [GO:0035735]	cilium [GO:0005929]	NA	NA	7
361	B2RNR6;Q96KR1;A8K849;B3KP82;H0Y8W1;B3KVS4;Q05D65	Sa1-IAA	-0.907626	0.530301	-1.71153	7	0.130718	0.658061	NA	0.583851	0	B2RNR6	Zinc finger RNA-binding protein	ZFR	NA	NA	nucleic acid binding [GO:0003676]; zinc ion binding [GO:0008270]	NA	68
362	B2RTS4;H0Y2V6;Q5SW79;A6H8X9;B3KME6;B4DL23;Q6AZE1;H0Y4T4	Sa1-IAA	-0.219398	0.250684	-0.875196	4	0.430874	0.823824	NA	0.642857	0	B2RTS4	Centrosomal protein of 170 kDa	CEP170	NA	NA	NA	NA	46
363	B2RTX8;Q7Z5K2;A8K273;Q8WVX6;F6QZY1	Sa1-IAA	Inf	NA	NA	NA	NA	0	oneConditionMissing	0.771429	0	B2RTX8	Wings apart-like protein homolog	WAPAL	NA	NA	NA	NA	29
364	B2RWN5;B4E263;Q8N7L7;Q96ES5	Sa1-IAA	-1.15387	0.714174	-1.61567	3	0.204581	0.731578	NA	0.571429	0	B2RWN5	NA	HEATR1	rRNA processing [GO:0006364]	nucleolus [GO:0005730]	NA	NA	34
365	B2RWP0;O60292	Sa1-IAA	-0.296428	0.0846503	-3.50179	1	0.177085	0.717917	NA	0.571429	0	B2RWP0	Signal-induced proliferation-associated 1-like protein 3	SIPA1L3	regulation of small GTPase mediated signal transduction [GO:0051056]	NA	GTPase activator activity [GO:0005096]	NA	8
366	B2RWP5;Q96L73;Q8NB95;Q96MN8	Sa1-IAA	-0.523403	0.767947	-0.681561	3	0.544416	0.868716	NA	0.571429	0	B2RWP5	Histone-lysine N-methyltransferase;Histone-lysine N-methyltransferase, H3 lysine-36 and H4 lysine-20 specific	NSD1	NA	chromosome [GO:0005694]; nucleus [GO:0005634]	histone-lysine N-methyltransferase activity [GO:0018024]; metal ion binding [GO:0046872]	NA	16
367	B3GQE6;B7Z6D5;Q96GQ7;Q53G15;A0A087X059;A0A087WYH5;Q3MI07	Sa1-IAA	-0.931791	0.423223	-2.20166	7	0.0635754	0.618718	NA	0.479592	0	B3GQE6	Probable ATP-dependent RNA helicase DDX27	DDX27	NA	NA	ATP binding [GO:0005524]; nucleic acid binding [GO:0003676]; RNA helicase activity [GO:0003724]	NA	41
368	B3KM53;A0A2Z2CIT2;Q9UBC3;Q59H79	Sa1-IAA	-0.233595	NA	NA	0	NA	NA	NA	0.714286	0	B3KM53	DNA (cytosine-5)-methyltransferase 3B	DNMT3B	regulation of gene expression [GO:0010468]	nucleus [GO:0005634]	DNA-methyltransferase activity [GO:0009008]; metal ion binding [GO:0046872]	NA	0
369	B3KML9;Q8N6N5;Q8IZ29;P68371;Q8IWP6;Q96HX0;B4DE77;P04350;B4DJ43;B4DFH6;Q3ZCR3;A0A183YE00;Q3ZCM7;B4DNW1;M0R0X0;M0QY85;M0QY37;M0QX14;A0A075B724;M0QZL7;M0R278	Sa1-IAA	0.38634	0.873803	0.442137	2	0.701605	0.929207	NA	0.285714	0	B3KML9	Tubulin beta-4B chain;Tubulin beta-4A chain	TUBB2C;TUBB4B;TUBB4A	cell projection organization [GO:0030030]; microtubule-based process [GO:0007017]	centriole [GO:0005814]; cilium [GO:0005929]; cytoplasm [GO:0005737]; microtubule [GO:0005874]; nucleus [GO:0005634]	GTPase activity [GO:0003924]; GTP binding [GO:0005525]; structural constituent of cytoskeleton [GO:0005200]	NA	376
370	B3KMP2;Q2M2R1;Q4KMX6;A8KAQ7;A5D8X2;A0A024RBJ3;Q9UJX3;H0YIX7	Sa1-IAA	-0.601332	NA	NA	0	NA	NA	NA	0.714286	0	B3KMP2	Anaphase-promoting complex subunit 7	ANAPC7	NA	NA	NA	NA	9
371	B3KMR5;Q5JTH9;B3KY97;B3KPQ2;A0A087X1U8;H7C1M8;A0A087X0G0;A0A087WYW2	Sa1-IAA	-0.229424	0.415328	-0.552393	7	0.597866	0.882897	NA	0.511905	0	B3KMR5	RRP12-like protein	RRP12	NA	nucleus [GO:0005634]	NA	NA	61
372	B3KMX0;A0A024R7U6;P33991;A0A3B3IS57;A0A3B3IT92;A0A3B3ITP6;A0A3B3IU45;B4DLA6;E5RG31;E5RG53;A4FS09;E5RFR3;A0A3B3IS88;A0A3B3IRR8	Sa1-IAA	0.572911	0.561081	1.02108	4	0.364944	0.792452	NA	0.5	0	B3KMX0	DNA replication licensing factor MCM4	MCM4	cell cycle [GO:0007049]; DNA replication initiation [GO:0006270]	MCM complex [GO:0042555]; nucleus [GO:0005634]	ATP binding [GO:0005524]; DNA binding [GO:0003677]; DNA helicase activity [GO:0003678]	NA	113
373	B3KN45;A0A024R6H0;Q9P2I0;B3KMI0;H0YJF4	Sa1-IAA	0.520025	0.685368	0.758753	1	0.586783	0.877134	NA	0.571429	0	B3KN45	Cleavage and polyadenylation specificity factor subunit 2	CPSF2	mRNA cleavage [GO:0006379]; mRNA polyadenylation [GO:0006378]	mRNA cleavage and polyadenylation specificity factor complex [GO:0005847]	RNA binding [GO:0003723]	NA	57
374	B3KNF6;B4DR61;P61619;B3KQ68;F8W776;Q8TC24;Q9H9S3;H7C1Q9;C9JXC6;B3KNG2;H7C069;A6NK38;F2Z2C7;A6NIF9;B3KME8;C9JJV4;B4DM08;H7C1S8;Q9NVQ7	Sa1-IAA	0.148704	0.440111	0.337879	5	0.749179	0.941025	NA	0.571429	0	B3KNF6	Protein transport protein Sec61 subunit alpha isoform 1;Protein transport protein Sec61 subunit alpha isoform 2	SEC61A1;SEC61A2	pronephric nephron development [GO:0039019]; protein transport [GO:0015031]; response to interferon-gamma [GO:0034341]	endoplasmic reticulum membrane [GO:0005789]; integral component of membrane [GO:0016021]; rough endoplasmic reticulum [GO:0005791]	ribosome binding [GO:0043022]	NA	28
375	B3KNK4;B3KM95;O95674	Sa1-IAA	#NAME?	NA	NA	NA	NA	0	oneConditionMissing	0.857143	0	B3KNK4	Phosphatidate cytidylyltransferase;Phosphatidate cytidylyltransferase 2	CDS2	CDP-diacylglycerol biosynthetic process [GO:0016024]	integral component of membrane [GO:0016021]	phosphatidate cytidylyltransferase activity [GO:0004605]	NA	1
376	B3KNM6;O75844	Sa1-IAA	0.687372	1.90336	0.361136	1	0.779372	0.949625	NA	0.571429	0	B3KNM6	CAAX prenyl protease 1 homolog	ZMPSTE24	CAAX-box protein processing [GO:0071586]	endoplasmic reticulum membrane [GO:0005789]; integral component of membrane [GO:0016021]	metal ion binding [GO:0046872]; metalloendopeptidase activity [GO:0004222]	NA	7
377	B3KNS8;O75683;REV__I3L4X5;REV__B3KS48;REV__Q70CQ4	Sa1-IAA	-0.504131	0.586295	-0.859859	5	0.429158	0.823824	NA	0.619048	0	B3KNS8	Surfeit locus protein 6	SURF6	NA	nucleus [GO:0005634]	NA	NA	38
378	B3KPM8;Q8N5C6	Sa1-IAA	#NAME?	NA	NA	NA	NA	0	oneConditionMissing	0.857143	0	B3KPM8	S1 RNA-binding domain-containing protein 1	SRBD1	nucleobase-containing compound metabolic process [GO:0006139]	NA	nucleic acid binding [GO:0003676]	NA	13
379	B3KQ42;A0A024R087;P52739;D6RBK1;D6RJH2;D6R9I2	Sa1-IAA	#NAME?	NA	NA	NA	NA	0	oneConditionMissing	0.857143	0	B3KQ42	Zinc finger protein 131	hCG_36935;ZNF131	NA	nucleus [GO:0005634]	DNA-binding transcription factor activity, RNA polymerase II-specific [GO:0000981]	NA	14
380	B3KQV6;Q8NB89;B4DE69;B4DQY1;B4DDF7;A8K7B7;A8K3H8;P30153;E9PH38;B4E1Q0;C9J9C1	Sa1-IAA	-0.350523	0.698327	-0.501947	2	0.665514	0.912563	NA	0.666667	0	B3KQV6	Serine/threonine-protein phosphatase 2A 65 kDa regulatory subunit A alpha isoform	PPP2R1A	protein-containing complex assembly [GO:0065003]	NA	protein phosphatase regulator activity [GO:0019888]	NA	132
381	B3KSG9;A0A024QYR8;Q99805	Sa1-IAA	Inf	NA	NA	NA	NA	0	oneConditionMissing	0.857143	0	B3KSG9	Transmembrane 9 superfamily member 2	TM9SF2	NA	integral component of membrane [GO:0016021]	NA	NA	1
382	B3KSL5;Q9Y383;B3KRR1;A0A0A6YYJ8	Sa1-IAA	-0.700944	0.615113	-1.13954	7	0.291967	0.783886	NA	0.571429	0	B3KSL5	Putative RNA-binding protein Luc7-like 2	LUC7L2	mRNA splice site selection [GO:0006376]	U1 snRNP [GO:0005685]	mRNA binding [GO:0003729]	NA	151
383	B3KT06;P68363;B3KPS3;Q53GA7;A8JZY9;F5H5D3;Q9BQE3;Q71U36;B7Z1K5;F8VVB9;A0A1W2PQM2;Q8N532;B4DQK4;Q1ZYQ1;P0DPH8;P0DPH7;F8VQQ4;B4DDU2;Q9UQM3;Q6PEY2;F8VRZ4;F8VS66;B4DN58;C9J2C0;Q7Z3M3;Q9NY65;F8VX09;F8VWV9;C9JDS9;F8VRK0;F8VXZ7;C9K0S6;Q6QMJ5;F8W0F6;V9GZ17;Q9H853;A6NHL2	Sa1-IAA	-0.63488	0.963136	-0.659179	5	0.538924	0.868716	NA	0.571429	0	B3KT06	Tubulin alpha-1B chain;Tubulin alpha-1C chain;Tubulin alpha-1A chain;Tubulin alpha-3E chain	TUBA1B;TUBA1C;TUBA1A;TUBA2;TUBA3E	microtubule-based process [GO:0007017]	cytoplasm [GO:0005737]; microtubule [GO:0005874]	GTPase activity [GO:0003924]; GTP binding [GO:0005525]; structural constituent of cytoskeleton [GO:0005200]	NA	389
384	B3KT25;Q96S55	Sa1-IAA	-0.140203	0.0492408	-2.84729	0	NA	NA	NA	0.571429	0	B3KT25	ATPase WRNIP1	WRNIP1	DNA repair [GO:0006281]; DNA replication [GO:0006260]	NA	ATP binding [GO:0005524]; DNA binding [GO:0003677]; metal ion binding [GO:0046872]	NA	26
385	B3KTP9;A0A024R4A0;P19338;B3KM80;Q6ZS99;H7BY16;Q9BQ02;C9JYW2;C9JLB1;C9J1H7;C9JWL1	Sa1-IAA	1.04821	1.01082	1.03699	6	0.339713	0.790424	NA	0.625	0	B3KTP9	Nucleolin	NCL	NA	cytoplasm [GO:0005737]; nucleolus [GO:0005730]	DNA binding [GO:0003677]; RNA binding [GO:0003723]	NA	261
386	B3KTS5;A0A1L1UHR1;P21796;B4DEI3;C9JI87	Sa1-IAA	#NAME?	NA	NA	NA	NA	0	oneConditionMissing	0.571429	0	B3KTS5	Voltage-dependent anion-selective channel protein 1	VDAC1	apoptotic process [GO:0006915]	membrane raft [GO:0045121]; mitochondrial outer membrane [GO:0005741]; plasma membrane [GO:0005886]; pore complex [GO:0046930]	porin activity [GO:0015288]; voltage-gated anion channel activity [GO:0008308]	NA	58
387	B3KU03;D3DPS3;Q3KQU3;C9JIR3;Q6NX58;E9PLH3;H0YF21	Sa1-IAA	-0.643646	0.0525142	-12.2566	1	0.0518262	0.615638	NA	0.571429	0	B3KU03	MAP7 domain-containing protein 1	RPRC1;MAP7D1	microtubule cytoskeleton organization [GO:0000226]	microtubule cytoskeleton [GO:0015630]	NA	NA	24
388	B3KUR4;A4D299;J3KR72;P49848	Sa1-IAA	1.32597	NA	NA	0	NA	NA	NA	0.714286	0	B3KUR4	Transcription initiation factor TFIID subunit 6	TAF6	transcription initiation from RNA polymerase II promoter [GO:0006367]	SAGA complex [GO:0000124]; SLIK (SAGA-like) complex [GO:0046695]; transcription factor TFIID complex [GO:0005669]	RNA polymerase II general transcription initiation factor activity [GO:0016251]; translation initiation factor activity [GO:0003743]	NA	36
389	B3KV39;B4DY33;A4D1Z4;P85037	Sa1-IAA	0.0885939	1.30795	0.0677351	1	0.956944	0.996403	NA	0.428571	0	B3KV39	Forkhead box protein K1	KIAA0415;FOXK1	NA	nucleus [GO:0005634]	DNA-binding transcription factor activity [GO:0003700]; sequence-specific DNA binding [GO:0043565]	NA	5
390	B3KVX6;Q8TB01;Q6NWZ1;A0A024RBH2;Q07065	Sa1-IAA	-0.30958	0.545738	-0.567269	7	0.588253	0.877134	NA	0.367347	0	B3KVX6	Cytoskeleton-associated protein 4	CKAP4	NA	NA	NA	NA	58
391	B3KVY9;Q8TB61	Sa1-IAA	-0.0115735	0.407093	-0.0284296	4	0.978681	0.996403	NA	0.571429	0	B3KVY9	Adenosine 3-phospho 5-phosphosulfate transporter 1	SLC35B2	transmembrane transport [GO:0055085]	integral component of membrane [GO:0016021]	NA	NA	4
392	B3KW74;X6R5E5;B7Z6T7;A8K2S7;A0A024RE02;Q8NBM4;A0A087WXT1	Sa1-IAA	0.23445	0.546042	0.429362	3	0.696629	0.926579	NA	0.285714	0	B3KW74	Ubiquitin-associated domain-containing protein 2	PHGDHL1;UBAC2	NA	NA	NA	NA	6
393	B3KY03;B3KMS0;Q15021;B4E0B7;E7EN77;Q6ZV00;F5H431;F5GZK7;A0PJ76	Sa1-IAA	0.72995	2.16406	0.337306	0	NA	NA	NA	0.571429	0	B3KY03	Condensin complex subunit 1	NCAPD2	cell division [GO:0051301]; mitotic chromosome condensation [GO:0007076]	chromosome [GO:0005694]; nucleus [GO:0005634]	NA	NA	52
394	B3KY11;A8KA56;A0A024R0Z3;Q9BUQ8;H0YI52;H0YIL9;F8VVA2	Sa1-IAA	0.158237	0.501198	0.315718	5	0.76497	0.945562	NA	0.489796	0	B3KY11	Probable ATP-dependent RNA helicase DDX23	DDX23	NA	NA	ATP binding [GO:0005524]; nucleic acid binding [GO:0003676]; RNA helicase activity [GO:0003724]	NA	63
395	B3KY54;P53814;B3KY41;B4E229;B4DI56;A0A087WVP4;A0A087X1R1;Q59F18;B3KUD6;B4DEL1;H7BZZ8;B4E0L3;B4DT59;B3KTQ3;B4DVY5;B5MCI0;B3KS32;C9JGQ0;C9JP19;H7C372;C9JQZ8;B4DUZ2	Sa1-IAA	0.040312	0.61104	0.0659729	1	0.958061	0.996403	NA	0.642857	0	B3KY54	Smoothelin	SMTN	NA	NA	NA	NA	8
396	B3KY60;Q99459;B4DSH1	Sa1-IAA	-0.44607	0.234471	-1.90245	7	0.0988487	0.618718	NA	0.479592	0	B3KY60	Cell division cycle 5-like protein	CDC5L	cell division [GO:0051301]; mRNA processing [GO:0006397]; RNA splicing [GO:0008380]	spliceosomal complex [GO:0005681]	NA	NA	79
397	B3KY63;A0A2R8Y5M9;A0A2R8Y7I0;A0A2R8YE38;A0A2R8Y7M9;K7EMY3;B3KRD4;Q659F1;Q659D0;A0A2R8Y6G9;F5H6N4;Q05CG6;Q6ZSZ4;F2Z2R5;A0A2R8Y795;K7EPV1;F5H596;K7ESA5;I3L229;H7C3H7	Sa1-IAA	-1.06008	0.585672	-1.81002	1	0.321331	0.783886	NA	0.428571	0	B3KY63	NA	NA	chromatin organization [GO:0006325]	NuRD complex [GO:0016581]	ATP binding [GO:0005524]; DNA binding [GO:0003677]; DNA helicase activity [GO:0003678]; histone deacetylase binding [GO:0042826]; metal ion binding [GO:0046872]; RNA polymerase II repressing transcription factor binding [GO:0001103]	NA	0
398	B4DDH8;Q96N66	Sa1-IAA	-0.628503	0.731853	-0.858783	4	0.438877	0.828125	NA	0.333333	0	B4DDH8	Lysophospholipid acyltransferase 7	MBOAT7	NA	integral component of membrane [GO:0016021]	NA	NA	2
399	B4DDM8;Q13443	Sa1-IAA	-1.67936	NA	NA	0	NA	NA	NA	0.714286	0	B4DDM8	Disintegrin and metalloproteinase domain-containing protein 9	ADAM9	integrin-mediated signaling pathway [GO:0007229]	integral component of membrane [GO:0016021]	NA	NA	3
400	B4DDX2;Q07666;B4E043;B2R7B5;B3KTS3;Q5VWX1	Sa1-IAA	-0.18641	0.174281	-1.06959	7	0.320291	0.783886	NA	0.52381	0	B4DDX2	KH domain-containing, RNA-binding, signal transduction-associated protein 1	KHDRBS1	NA	nucleus [GO:0005634]	RNA binding [GO:0003723]; SH3 domain binding [GO:0017124]	NA	138
401	B4DDZ5;B4DRH6;A0A2R8Y4F5;E9KL44;H0YFD6;P40939;V9GZL3	Sa1-IAA	Inf	NA	NA	NA	NA	0	oneConditionMissing	0.714286	0	B4DDZ5	Trifunctional enzyme subunit alpha, mitochondrial;Long-chain enoyl-CoA hydratase;Long chain 3-hydroxyacyl-CoA dehydrogenase	HADHA	fatty acid beta-oxidation [GO:0006635]	mitochondrial fatty acid beta-oxidation multienzyme complex [GO:0016507]	3-hydroxyacyl-CoA dehydrogenase activity [GO:0003857]; enoyl-CoA hydratase activity [GO:0004300]	NA	72
402	B4DE55;B2RCV0	Sa1-IAA	-1.35127	0.437027	-3.09196	0	NA	NA	NA	0.714286	0	B4DE55	NA	MBIP	NA	NA	NA	NA	0
403	B4DEM1;P78382	Sa1-IAA	0.0985908	NA	NA	0	NA	NA	NA	0.714286	0	B4DEM1	CMP-sialic acid transporter	SLC35A1	carbohydrate transport [GO:0008643]	Golgi membrane [GO:0000139]; integral component of membrane [GO:0016021]	pyrimidine nucleotide-sugar transmembrane transporter activity [GO:0015165]	NA	0
404	B4DET0;A8K6G9;Q92620;B4DM30;H3BV01;J3KTG2;H3BQT9;J3KRT1;B4DN69	Sa1-IAA	-0.496324	0.570584	-0.869854	1	0.544239	0.868716	NA	0.571429	0	B4DET0	Pre-mRNA-splicing factor ATP-dependent RNA helicase PRP16	DHX38	NA	NA	ATP binding [GO:0005524]; nucleic acid binding [GO:0003676]; RNA helicase activity [GO:0003724]	NA	30
405	B4DFE2;A8K5V5;Q96QT6;Q0VAI6;C9J9G2;K7ENU0;K7ERZ4;K7EJ43;K7EPF7	Sa1-IAA	1.31049	0.591512	2.21549	0	NA	NA	NA	0.571429	0	B4DFE2	PHD finger protein 12	PHF12	negative regulation of transcription, DNA-templated [GO:0045892]	NA	metal ion binding [GO:0046872]; transcription corepressor activity [GO:0003714]	NA	5
406	B4DGH7;Q9UJX6	Sa1-IAA	-0.285293	0.302522	-0.943049	1	0.518654	0.86386	NA	0.428571	0	B4DGH7	Anaphase-promoting complex subunit 2	ANAPC2	ubiquitin-dependent protein catabolic process [GO:0006511]	NA	ubiquitin protein ligase binding [GO:0031625]	NA	1
407	B4DGW0;Q2TA77;A0A087WUY7;A0A024RC49;Q1XBU8;A4ZVS8;A4ZVS7;O75928;O75925	Sa1-IAA	1.27859	0.682331	1.87385	2	0.201808	0.731578	NA	0.428571	0	B4DGW0	E3 SUMO-protein ligase PIAS2;E3 SUMO-protein ligase PIAS1	PIAS2;PIAS1	NA	NA	SUMO transferase activity [GO:0019789]; zinc ion binding [GO:0008270]	NA	2
408	B4DH58;A0A087WU53;Q9H0U3;Q96SP2;A8MUP5	Sa1-IAA	-0.842238	0.648504	-1.29874	3	0.284847	0.783886	NA	0.428571	0	B4DH58	Magnesium transporter protein 1	MAGT1	protein N-linked glycosylation [GO:0006487]	integral component of membrane [GO:0016021]; oligosaccharyltransferase complex [GO:0008250]; plasma membrane [GO:0005886]	magnesium ion transmembrane transporter activity [GO:0015095]	NA	7
409	B4DHC5;A0A024R458;A0A0S2Z444;A0A0S2Z3Y3;A0A0S2Z3Z1;A0A0S2Z462;P52594;C9J2I0;B8ZZY2	Sa1-IAA	0.194543	0.136742	1.4227	2	0.290782	0.783886	NA	0.285714	0	B4DHC5	Arf-GAP domain and FG repeat-containing protein 1	HRB;AGFG1	NA	NA	NA	NA	9
410	B4DIN4;A0A0S2Z4U3;D3DPN2;O75056	Sa1-IAA	0.270027	0.236088	1.14375	0	NA	NA	NA	0.571429	0	B4DIN4	Syndecan;Syndecan-3	SDC3	NA	integral component of membrane [GO:0016021]	NA	NA	0
411	B4DIS6;Q9H6R0;I3L1L6;Q9NPV4;Q05BE5	Sa1-IAA	0.00550637	0.234049	0.0235265	4	0.982357	0.996403	NA	0.5	0	B4DIS6	Putative ATP-dependent RNA helicase DHX33	DHX33	NA	NA	ATP binding [GO:0005524]; nucleic acid binding [GO:0003676]; RNA helicase activity [GO:0003724]	NA	11
412	B4DIU6;A8K129;A0A024R1P7;B4E2A6;Q9UH99;A0A024R1S6;Q6NT72;B0QY68;B0QY66;B0QY69;B0QY65;B0QY67;B0QY60;B0QY63;B0QY64	Sa1-IAA	-0.657628	0.157154	-4.1846	1	0.149333	0.667731	NA	0.571429	0	B4DIU6	SUN domain-containing protein 2	UNC84B;SUN2	NA	integral component of nuclear inner membrane [GO:0005639]; meiotic nuclear membrane microtubule tethering complex [GO:0034993]	NA	NA	31
413	B4DJ17;A0A024QZ44;A0A024QZ15;Q96NT5	Sa1-IAA	0.0502502	0.0620298	0.810097	1	0.566546	0.872464	NA	0.428571	0	B4DJ17	Proton-coupled folate transporter	HCP1;SLC46A1	NA	integral component of membrane [GO:0016021]	transmembrane transporter activity [GO:0022857]	NA	0
414	B4DJ73;B4DHL5;B4E228;Q6NW34;B4DVN9;B4E1X5;B4DUV5;E9PFF8;B4DDJ6	Sa1-IAA	-0.491378	0.460204	-1.06774	5	0.334455	0.790424	NA	0.428571	0	B4DJ73	Uncharacterized protein C3orf17	C3orf17	NA	NA	NA	NA	6
415	B4DJK4;B4DZJ7;O00267;B4E0Q4;M0R105;M0R2M5;B4DHJ8	Sa1-IAA	0.779649	0.606149	1.28623	1	0.420709	0.822367	NA	0.714286	0	B4DJK4	Transcription elongation factor SPT5	SUPT5H	regulation of DNA-templated transcription, elongation [GO:0032784]; regulation of transcription by RNA polymerase II [GO:0006357]	nucleus [GO:0005634]	translation elongation factor activity [GO:0003746]	NA	50
416	B4DKE6;Q53HK8;A0A024RDQ8;P40938;Q5U0C2;A0A087X270	Sa1-IAA	-1.08826	0.317109	-3.43181	7	0.0109583	0.468305	NA	0.0714286	0	B4DKE6	Replication factor C subunit 3	RFC3	DNA replication [GO:0006260]	NA	DNA binding [GO:0003677]	NA	37
417	B4DKW1;P11166;B3KVN0;B4DDR6;Q59GX2;A0A1W2PQ59;A6NL68;A0A0D9SFK9	Sa1-IAA	-0.0812044	0.654009	-0.124164	4	0.907175	0.984803	NA	0.285714	0	B4DKW1	Solute carrier family 2, facilitated glucose transporter member 1	SLC2A1	carbohydrate transport [GO:0008643]	integral component of membrane [GO:0016021]	transmembrane transporter activity [GO:0022857]	NA	21
418	B4DL07;P28288;B4DZ22	Sa1-IAA	0.381481	0.3459	1.10287	5	0.320316	0.783886	NA	0.657143	0	B4DL07	ATP-binding cassette sub-family D member 3	ABCD3	long-chain fatty acid import into peroxisome [GO:0015910]	integral component of membrane [GO:0016021]; peroxisomal membrane [GO:0005778]	ATPase activity [GO:0016887]; ATPase-coupled transmembrane transporter activity [GO:0042626]; ATP binding [GO:0005524]; long-chain fatty acid transporter activity [GO:0005324]; protein homodimerization activity [GO:0042803]	NA	40
419	B4DL80;G5EA36;P30260;I0EZ68;I3L328;I0EZ72;I3L225;I3L394;F6QPS0	Sa1-IAA	-0.356411	0.638661	-0.558059	1	0.675954	0.916659	NA	0.642857	0	B4DL80	Cell division cycle protein 27 homolog	CDC27	cell division [GO:0051301]	NA	NA	NA	24
420	B4DLF0;P22223;J3QL75;J3QL41	Sa1-IAA	-0.02009	0.889932	-0.0225747	2	0.984039	0.996403	NA	0.714286	0	B4DLF0	Cadherin-3	CDH3	homophilic cell adhesion via plasma membrane adhesion molecules [GO:0007156]	integral component of membrane [GO:0016021]; plasma membrane [GO:0005886]	calcium ion binding [GO:0005509]	NA	0
421	B4DLG2;O75152;E9PQ61;E9PBY7;Q0D2N5;B4DYM8;A0A1W2PPR9;A0A1B0GTU1;A0A024R8H9;A0A494C0C4	Sa1-IAA	0.195414	0.370549	0.527365	7	0.614236	0.88837	NA	0.472527	0	B4DLG2	Zinc finger CCCH domain-containing protein 11A	ZC3H11A	NA	NA	NA	NA	46
422	B4DLM8;O15381;B4DQJ4;C9J6P7;A0JLP9;E9PH71	Sa1-IAA	-1.09041	0.49907	-2.18489	4	0.0942281	0.618718	NA	0.571429	0	B4DLM8	Nuclear valosin-containing protein-like	NVL	NA	NA	ATP binding [GO:0005524]	NA	31
423	B4DLQ3;A6NF31;A8K2T9;E9KL37;O75665;A0A0A0MS89;Q4VAK3	Sa1-IAA	0.229106	0.559204	0.4097	4	0.703017	0.929207	NA	0.428571	0	B4DLQ3	Oral-facial-digital syndrome 1 protein	OFD1	NA	NA	NA	NA	13
424	B4DLS8;B2R791;O43395;Q53GV6;B4DM28	Sa1-IAA	-0.440106	0.400383	-1.09921	3	0.351978	0.790424	NA	0.678571	0	B4DLS8	U4/U6 small nuclear ribonucleoprotein Prp3	PRPF3	mRNA splicing, via spliceosome [GO:0000398]	U4/U6 x U5 tri-snRNP complex [GO:0046540]; viral nucleocapsid [GO:0019013]	NA	NA	59
425	B4DM22;Q59EG8;Q13200;Q13041;Q9NSM5;H7C1H2	Sa1-IAA	-0.411756	0.512839	-0.802894	2	0.506286	0.861454	NA	0.642857	0	B4DM22	26S proteasome non-ATPase regulatory subunit 2	PSMD2;DKFZp564A2282	regulation of protein catabolic process [GO:0042176]	proteasome regulatory particle, base subcomplex [GO:0008540]	enzyme regulator activity [GO:0030234]	NA	124
426	B4DM27	Sa1-IAA	NA	NA	NA	NA	NA	NA	NA	1	0	B4DM27	NA	NA	NA	NA	NA	NA	0
427	B4DM85;O00139;B0AZS5;D6R9M0	Sa1-IAA	Inf	NA	NA	NA	NA	0	oneConditionMissing	0.571429	0	B4DM85	Kinesin-like protein;Kinesin-like protein KIF2A	KIF2A	microtubule-based movement [GO:0007018]	cytoplasm [GO:0005737]; microtubule [GO:0005874]	ATP binding [GO:0005524]; microtubule binding [GO:0008017]; microtubule motor activity [GO:0003777]	NA	33
428	B4DMA2;A0A024RD80;P08238;B4DGL0;Q6PK50;Q9H6X9;A8K3W9;Q58FF7;Q58FF8;O14942;G3V2J8;B4DTA5;Q86SX1;Q14568;Q58FF6;F8W026;B4DQX3;Q96GW1;A0A1W2PRR1;Q58FG0	Sa1-IAA	-0.0775016	0.729958	-0.106173	6	0.918906	0.987887	NA	0.6	0	B4DMA2	Heat shock protein HSP 90-beta	HSP90AB1	protein folding [GO:0006457]	melanosome [GO:0042470]	ATP binding [GO:0005524]; unfolded protein binding [GO:0051082]	NA	277
429	B4DMM1;A0A0S2Z4Z2;H3BP71;A8K6K1;A0A0S2Z537;O75150;H3BQ99;H3BUL6;I3L332;A0A087WTK2;B4E313;B4DEN2;Q6ZN99;B4DFU2	Sa1-IAA	0.500289	0.634103	0.788971	1	0.574751	0.877134	NA	0.571429	0	B4DMM1	E3 ubiquitin-protein ligase BRE1B	RNF40	histone monoubiquitination [GO:0010390]	nucleus [GO:0005634]	ligase activity [GO:0016874]; metal ion binding [GO:0046872]; ubiquitin-protein transferase activity [GO:0004842]	NA	19
430	B4DMV0;I3L4C2;Q9UQB8;I3L3C5;I3L0M4;I3L3J7;I3L327;I3L3C6;B4DWA1;B4DQ43;B3KPV9;I3L2J6;I3L113;I3L526;I3L0Y9;I3L125;I3L1C8;I3L2M4	Sa1-IAA	Inf	NA	NA	NA	NA	0	oneConditionMissing	0.714286	0	B4DMV0	Brain-specific angiogenesis inhibitor 1-associated protein 2	BAIAP2	plasma membrane organization [GO:0007009]; regulation of actin cytoskeleton organization [GO:0032956]	cytoplasm [GO:0005737]; cytoskeleton [GO:0005856]; filopodium [GO:0030175]; membrane [GO:0016020]; ruffle [GO:0001726]	cytoskeletal anchor activity [GO:0008093]	NA	4
431	B4DP20;J3KMX1;Q99567;B7Z5I6;I3L4K7;I3L245	Sa1-IAA	-0.00355064	0.703768	-0.00504519	4	0.996216	0.996403	NA	0.5	0	B4DP20	Nuclear pore complex protein Nup88	NUP88	mRNA transport [GO:0051028]; ribosomal large subunit export from nucleus [GO:0000055]; ribosomal small subunit export from nucleus [GO:0000056]	nuclear pore [GO:0005643]	structural constituent of nuclear pore [GO:0017056]	NA	34
432	B4DP62;Q6LAP8;D9HTE9;P53007	Sa1-IAA	-0.557766	0.97357	-0.572908	2	0.624532	0.893695	NA	0.571429	0	B4DP62	Tricarboxylate transport protein, mitochondrial	SLC25A1	NA	integral component of membrane [GO:0016021]	NA	NA	42
433	B4DP66;Q9BRK4	Sa1-IAA	-0.137079	0.530044	-0.258619	3	0.812658	0.961441	NA	0.357143	0	B4DP66	Leucine zipper putative tumor suppressor 2	LZTS2	cell cycle [GO:0007049]; cell division [GO:0051301]; Wnt signaling pathway [GO:0016055]	cytoplasm [GO:0005737]; cytoskeleton [GO:0005856]	NA	NA	5
434	B4DP70;F1T0B3;A0A087X2G1;A3RJH1;Q92499	Sa1-IAA	Inf	NA	NA	NA	NA	0	oneConditionMissing	0.714286	0	B4DP70	ATP-dependent RNA helicase DDX1	DDX1	defense response to virus [GO:0051607]; tRNA processing [GO:0008033]	NA	ATP binding [GO:0005524]; exonuclease activity [GO:0004527]; helicase activity [GO:0004386]; nucleic acid binding [GO:0003676]	NA	125
435	B4DPZ5;B4DNU9;Q6NZI2;B3KRY5	Sa1-IAA	0.131243	0.333099	0.394006	5	0.709819	0.930319	NA	0.357143	0	B4DPZ5	Polymerase I and transcript release factor	PTRF	termination of RNA polymerase I transcription [GO:0006363]	caveola [GO:0005901]	NA	NA	18
436	B4DQ50;B4DRV8	Sa1-IAA	-1.96795	NA	NA	0	NA	NA	NA	0.714286	0	B4DQ50	NA	NA	peptide cross-linking [GO:0018149]	NA	metal ion binding [GO:0046872]; protein-glutamine gamma-glutamyltransferase activity [GO:0003810]	B4DQ50;B4DRV8	NA
437	B4DQG8;Q9NPF5;Q5TG40;B4DTH3;B4DEF2;B4DTU6;Q5TG38;Q5TG39;Q5TG37;Q5TG36;B4DU03	Sa1-IAA	0.217509	0.275618	0.789169	4	0.474158	0.839022	NA	0.285714	0	B4DQG8	DNA methyltransferase 1-associated protein 1	DMAP1	chromatin remodeling [GO:0006338]; DNA repair [GO:0006281]; histone H2A acetylation [GO:0043968]; histone H4 acetylation [GO:0043967]; methylation [GO:0032259]; negative regulation of transcription, DNA-templated [GO:0045892]	NuA4 histone acetyltransferase complex [GO:0035267]	methyltransferase activity [GO:0008168]	NA	12
438	B4DRA0;A0A384NQ03;Q14498;G3XAC6;B7Z4L7;Q6N037;E1P5S2;B4DLM0;B3KWX7;Q68DD9;B4E1M7;A0A0U1RQH7;H0Y4X3;Q6MZY7;Q7Z3L0;A0A0U1RQW2;Q5QP23;Q5QP22;F8WF24;F2Z2Z5;A8MYG5;F2Z3E6;A0A087X122;F8WF73;G3V546;G3V5Z6;H0YJJ3;G3XAP0;B7Z8M4;B3KWQ8;A0A0S2Z5I1;Q6IA98;A0A0S2Z5J3;B2RDP1;A0A0S2Z5D9;Q86U06	Sa1-IAA	-0.9289	0.297135	-3.12619	6	0.0204234	0.500978	NA	0.571429	0	B4DRA0	RNA-binding protein 39	RBM39;DKFZp686A11192;RNPC2;DKFZp781C0423;DKFZp686C17209;DKFZp781I1140	mRNA processing [GO:0006397]	nucleus [GO:0005634]	RNA binding [GO:0003723]	NA	163
439	B4DS67;B4DLH2;Q8N357	Sa1-IAA	-0.810312	0.601901	-1.34626	0	NA	NA	NA	0.571429	0	B4DS67	Solute carrier family 35 member F6	C2orf18;SLC35F6	NA	integral component of membrane [GO:0016021]	NA	NA	3
440	B4DSM7;B4DYU5;Q53EM1;B2RCP2;Q13105	Sa1-IAA	#NAME?	NA	NA	NA	NA	0	oneConditionMissing	0.857143	0	B4DSM7	Zinc finger and BTB domain-containing protein 17	ZBTB17	NA	NA	NA	NA	0
441	B4DU91;A0A024R4S1;Q9Y6I3	Sa1-IAA	Inf	NA	NA	NA	NA	0	oneConditionMissing	0.714286	0	B4DU91	Epsin-1	EPN1	NA	cytoplasm [GO:0005737]	lipid binding [GO:0008289]	NA	2
442	B4DUI5;V9HWK1;Q53HE2;P60174;U3KPZ0;Q2QD09	Sa1-IAA	-0.575912	NA	NA	0	NA	NA	NA	0.714286	0	B4DUI5	Triosephosphate isomerase	HEL-S-49;TPI1	gluconeogenesis [GO:0006094]; glycolytic process [GO:0006096]	NA	methylglyoxal synthase activity [GO:0008929]; triose-phosphate isomerase activity [GO:0004807]	NA	90
443	B4DUQ1;A0A024R228;P61978;Q5EC54;B4DFF1;Q5T6W2;B3KU16;S4R359;S4R457	Sa1-IAA	-0.713994	0.258873	-2.75808	7	0.0281738	0.55158	NA	0.482143	0	B4DUQ1	Heterogeneous nuclear ribonucleoprotein K	HNRPK;HNRNPK	regulation of transcription by RNA polymerase II [GO:0006357]; RNA processing [GO:0006396]	cytoplasm [GO:0005737]; nucleoplasm [GO:0005654]; podosome [GO:0002102]; spliceosomal complex [GO:0005681]; viral nucleocapsid [GO:0019013]	DNA binding [GO:0003677]; RNA binding [GO:0003723]	NA	288
444	B4DUR3;A0A0A0MS90;A8K654;B4DI41;Q9UIS9;Q59EP6;K7EPZ6;K7EN65;K7EMA9	Sa1-IAA	0.42413	1.06248	0.399189	5	0.706234	0.929207	NA	0.742857	0	B4DUR3	Methyl-CpG-binding domain protein 1	MBD1	NA	host cell nucleus [GO:0042025]; nucleus [GO:0005634]	DNA binding [GO:0003677]; zinc ion binding [GO:0008270]	NA	2
445	B4DUT2;H0YG91	Sa1-IAA	-1.08668	0.74409	-1.46042	1	0.382231	0.811347	NA	0.571429	0	B4DUT2	NA	NA	NA	NA	NA	NA	0
446	B4DV79;A4D210;A0A024R821;P55884;B4DXN6;Q86UM1;Q96G38;C9JZG1;C9JQN7;Q59FS8	Sa1-IAA	-1.36878	0.692604	-1.97627	7	0.0886675	0.618718	NA	0.357143	0	B4DV79	Eukaryotic translation initiation factor 3 subunit B	EIF3B;EIF3S9	formation of cytoplasmic translation initiation complex [GO:0001732]	eukaryotic 43S preinitiation complex [GO:0016282]; eukaryotic 48S preinitiation complex [GO:0033290]; eukaryotic translation initiation factor 3 complex [GO:0005852]	translation initiation factor activity [GO:0003743]; translation initiation factor binding [GO:0031369]	NA	108
447	B4DVE4;F5H5U2;A0A384N652;A0A024RBS0;Q8NHQ9;E7EX41;Q8TEC9	Sa1-IAA	#NAME?	NA	NA	NA	NA	0	oneConditionMissing	0.857143	0	B4DVE4	ATP-dependent RNA helicase DDX55	DDX55	NA	NA	ATP binding [GO:0005524]; nucleic acid binding [GO:0003676]; RNA helicase activity [GO:0003724]	NA	22
448	B4DW57;A0A1U9X8F2;A0A1U9X8F1;Q06587;B4DVB5;A0A024RCR9;B4DMN3	Sa1-IAA	0.00786016	0.292435	0.0268783	1	0.982893	0.996403	NA	0.428571	0	B4DW57	E3 ubiquitin-protein ligase RING1	RING1	histone H2A monoubiquitination [GO:0035518]	PRC1 complex [GO:0035102]	NA	NA	25
449	B4DW90;B3KY12;A8K7V1;A8K566;Q12874;Q53HM6	Sa1-IAA	0.0274521	0.336613	0.081554	5	0.938165	0.9913	NA	0.428571	0	B4DW90	Splicing factor 3A subunit 3	SF3A3	mRNA splicing, via spliceosome [GO:0000398]	spliceosomal complex [GO:0005681]	RNA binding [GO:0003723]; zinc ion binding [GO:0008270]	NA	106
450	B4DX30;Q9ULC5;H0Y9U7;B7Z3Z9;E7EPM6;B4E0R0;A8K9T3;P33121	Sa1-IAA	-0.164631	0.594637	-0.27686	2	0.807877	0.959712	NA	0.5	0	B4DX30	Long-chain-fatty-acid--CoA ligase 5	ACSL5	NA	NA	ligase activity [GO:0016874]; nucleotide binding [GO:0000166]	NA	0
451	B4DXW2;A0A2R8Y4Z8;Q9Y3X0;M0QYB4;M0R2W0;M0QZR0	Sa1-IAA	-1.21606	0.0973473	-12.4919	1	0.050854	0.615638	NA	0.714286	0	B4DXW2	Coiled-coil domain-containing protein 9	CCDC9	NA	NA	NA	NA	4
452	B4DXX1;B2R713;Q7Z2T5;X6RK96	Sa1-IAA	-0.282871	0.363837	-0.777467	5	0.472047	0.838806	NA	0.428571	0	B4DXX1	TRMT1-like protein	TRMT1L	behavior [GO:0007610]	NA	tRNA (guanine-N2-)-methyltransferase activity [GO:0004809]; tRNA binding [GO:0000049]	NA	43
453	B4DY09;Q53FG3;F4ZW62;Q12905;F4ZW63;X6R6Z1;A0A0A0MRL0	Sa1-IAA	-0.835067	0.731142	-1.14214	7	0.290953	0.783886	NA	0.589286	0	B4DY09	Interleukin enhancer-binding factor 2	ILF2	NA	nucleoplasm [GO:0005654]	NA	NA	152
454	B4DYA1;G8YXX4;B4DJ39;O94900;O15405;O94842	Sa1-IAA	-0.0289404	0.66771	-0.0433428	2	0.969366	0.996403	NA	0.428571	0	B4DYA1	Thymocyte selection-associated high mobility group box protein TOX;TOX high mobility group box family member 3;TOX high mobility group box family member 4	Bbtx1;TOX;TOX3;TOX4	NA	nucleus [GO:0005634]	DNA binding [GO:0003677]	NA	32
455	B4DYP9;Q2VIM1;Q12834	Sa1-IAA	NA	NA	NA	NA	NA	NA	NA	0.857143	0	B4DYP9	Cell division cycle protein 20 homolog	CDC20	cell division [GO:0051301]; positive regulation of ubiquitin protein ligase activity [GO:1904668]	NA	anaphase-promoting complex binding [GO:0010997]; ubiquitin-protein transferase activator activity [GO:0097027]	NA	4
456	B4DYS3;A0A2R8YFA9;O94851	Sa1-IAA	#NAME?	NA	NA	NA	NA	0	oneConditionMissing	0.857143	0	B4DYS3	Protein-methionine sulfoxide oxidase MICAL2	MICAL2	actin filament depolymerization [GO:0030042]; positive regulation of transcription via serum response element binding [GO:0010735]	nucleus [GO:0005634]	actin binding [GO:0003779]; metal ion binding [GO:0046872]; NADPH:sulfur oxidoreductase activity [GO:0043914]	NA	0
457	B4DYZ1;Q9H8H2;B4E3G7	Sa1-IAA	-1.60962	0.763497	-2.10822	5	0.0888226	0.618718	NA	0.285714	0	B4DYZ1	Probable ATP-dependent RNA helicase DDX31	DDX31	NA	NA	ATP binding [GO:0005524]; RNA binding [GO:0003723]; RNA helicase activity [GO:0003724]	NA	19
458	B4DZ28;A0A1U9X7L7;A0A1U9X7L6;Q5SQH4;O60231;A0A140T947;A2AB15;Q9P186;Q5SQH5;A0A140T8Y5;A0A140T9T4	Sa1-IAA	-0.124054	0.43437	-0.285595	4	0.789367	0.952653	NA	0.571429	0	B4DZ28	Putative pre-mRNA-splicing factor ATP-dependent RNA helicase DHX16	DBP2;DHX16	NA	NA	ATP binding [GO:0005524]; nucleic acid binding [GO:0003676]; RNA helicase activity [GO:0003724]	NA	32
459	B4DZ54;Q5T6F2;B4E0R5;B4DRB6;B4DH66;B3KQ73;Q6UWR4;H0YDN2;Q9P0H6	Sa1-IAA	-1.12584	0.253552	-4.44029	6	0.00437447	0.409061	NA	0.428571	0	B4DZ54	Ubiquitin-associated protein 2	UBAP2	NA	NA	NA	NA	39
460	B4DZC3;B3KMC9;Q9H0D6;B4E0B9	Sa1-IAA	0.25847	0.470876	0.548913	7	0.600128	0.882897	NA	0.688312	0	B4DZC3	5-3 exoribonuclease 2	XRN2	mRNA processing [GO:0006397]	nucleus [GO:0005634]	5'-3' exoribonuclease activity [GO:0004534]; nucleic acid binding [GO:0003676]	NA	97
461	B4DZG2;A0A024R8C1;Q15361;A0A087WY09	Sa1-IAA	-0.761329	0.36097	-2.10912	2	0.169431	0.711889	NA	0.714286	0	B4DZG2	Transcription termination factor 1	TTF1	NA	NA	NA	NA	5
462	B4DZT6;A0A024R4V8;Q9NYZ3	Sa1-IAA	#NAME?	NA	NA	NA	NA	0	oneConditionMissing	0.785714	0	B4DZT6	G2 and S phase-expressed protein 1	GTSE1	NA	cytoplasm [GO:0005737]; cytoskeleton [GO:0005856]	NA	NA	5
463	B4DZZ8;B4DVK8;A0A1U9X8L9;A0A1U9X8K3;A0A1U9X8J5;A0A024RCX7;Q92504;A2AAT0	Sa1-IAA	-0.152356	0.519225	-0.29343	2	0.796841	0.956022	NA	0.5	0	B4DZZ8	Zinc transporter SLC39A7	SLC39A7	NA	integral component of membrane [GO:0016021]	metal ion transmembrane transporter activity [GO:0046873]	NA	11
464	B4E013;B4DND9;Q53YP0;B4E1N4;Q9NZM5;B4DVK1;Q7L4X7;Q96CS0;M0QZ34;M0QX73	Sa1-IAA	-0.186999	0.357434	-0.52317	4	0.628499	0.895424	NA	0.47619	0	B4E013	Glioma tumor suppressor candidate region gene 2 protein	GLTSCR2	ribosome biogenesis [GO:0042254]	nucleolus [GO:0005730]; nucleoplasm [GO:0005654]	NA	NA	46
465	B4E063;A0A1U9X7Y0;A0A024RCS7;Q9BW19;A0A1U9X7X5;B4DMA8;A2AB20;A0A140T9E6	Sa1-IAA	-0.909131	0.745103	-1.22014	4	0.289425	0.783886	NA	0.628571	0	B4E063	Kinesin-like protein;Kinesin-like protein KIFC1	KIFC1	microtubule-based movement [GO:0007018]	cytoplasm [GO:0005737]; microtubule [GO:0005874]	ATP binding [GO:0005524]; microtubule binding [GO:0008017]; microtubule motor activity [GO:0003777]	NA	26
466	B4E074;B4E303;Q9NVX2;A0A0A0MRH0;K7ERN7;K7EN33	Sa1-IAA	-0.507782	0.420749	-1.20685	5	0.281466	0.783886	NA	0.571429	0	B4E074	Notchless protein homolog 1	NLE1	NA	nucleolus [GO:0005730]	NA	NA	14
467	B4E0H5;A0A024R3Q6;Q9NVF7	Sa1-IAA	-0.0863996	NA	NA	0	NA	NA	NA	0.714286	0	B4E0H5	F-box only protein 28	FBXO28	NA	NA	NA	NA	4
468	B4E106;B4DKS0;A0A024R0H1;P53985;Q5T8R3;Q5T8R5;B2R6A5	Sa1-IAA	-0.563554	0.733358	-0.768457	2	0.522553	0.866046	NA	0.714286	0	B4E106	Monocarboxylate transporter 1	SLC16A1	NA	integral component of plasma membrane [GO:0005887]	lactate transmembrane transporter activity [GO:0015129]	NA	47
469	B4E1M5;E7ESE0;B4DLV8;D6RAN4;Q53Z07;P32969	Sa1-IAA	0.401704	0.422263	0.951313	0	NA	NA	NA	0.714286	0	B4E1M5	60S ribosomal protein L9	RPL9	translation [GO:0006412]	ribosome [GO:0005840]	rRNA binding [GO:0019843]; structural constituent of ribosome [GO:0003735]	NA	167
470	B4E218;Q96H55;A0A087WZQ9;A0A087WU55;A0A087WY49;A0A024R0S9;A0A087WYT7;B7Z1T7	Sa1-IAA	-1.02827	NA	NA	0	NA	NA	NA	0.714286	0	B4E218	Unconventional myosin-XIX	MYO19;MYOHD1	NA	mitochondrion [GO:0005739]; myosin complex [GO:0016459]	actin binding [GO:0003779]; ATP binding [GO:0005524]; motor activity [GO:0003774]	NA	7
471	B4E223;Q68D10	Sa1-IAA	-1.14141	0.286158	-3.98872	2	0.0574874	0.618718	NA	0.714286	0	B4E223	Protein SPT2 homolog	SPTY2D1	NA	NA	NA	NA	6
472	B4E2G8;A0A384MDY0;P35221;B4DKT9;B4DU00;G3XAM7;B3KSR8;E5RGY7;E5RIB1;A0A0A0MTJ6;F6KRI5;A0A0A0MRI5;Q49AD3;E5RJZ2;E5RIT8;E5RFM3;E5RJL0;E5RIE0;E5RHV7;H0YBB8;E5RGY6;E5RG03;E5RJ41;B7Z259	Sa1-IAA	-0.641449	0.690268	-0.929275	4	0.405348	0.817982	NA	0.514286	0	B4E2G8	Catenin alpha-1	CTNNA1	cell adhesion [GO:0007155]	actin cytoskeleton [GO:0015629]; adherens junction [GO:0005912]; cytoplasm [GO:0005737]; plasma membrane [GO:0005886]	actin filament binding [GO:0051015]; cadherin binding [GO:0045296]; structural molecule activity [GO:0005198]	NA	34
473	B4E2L1;H7C1R1	Sa1-IAA	Inf	NA	NA	NA	NA	0	oneConditionMissing	0.714286	0	B4E2L1	NA	NA	NA	actin cytoskeleton [GO:0015629]	actin filament binding [GO:0051015]	NA	2
474	B4E3V2;E7EMC7;Q13501	Sa1-IAA	-0.132108	0.312224	-0.423118	1	0.745177	0.941025	NA	0.428571	0	B4E3V2	Sequestosome-1	SQSTM1	NA	NA	NA	NA	47
475	B5BTZ8;P08579	Sa1-IAA	-1.29786	NA	NA	0	NA	NA	NA	0.714286	0	B5BTZ8	U2 small nuclear ribonucleoprotein B	SNRPB2	NA	viral nucleocapsid [GO:0019013]	RNA binding [GO:0003723]	NA	NA
476	B5BU25;P26368;K7ENG2	Sa1-IAA	-0.919822	0.531642	-1.73015	7	0.127222	0.658061	NA	0.47619	0	B5BU25	Splicing factor U2AF 65 kDa subunit	U2AF2	mRNA processing [GO:0006397]; RNA splicing [GO:0008380]	nucleus [GO:0005634]	RNA binding [GO:0003723]	NA	124
477	B5BU53;B2R9L6;A0A024R880;P50750;F8VXD2;A0A2R8YEB7;B3KX76;K7ELV5;F8VYH9;F8VZZ0;E5RIU6;F8VTV8;F8VWX7;F8VZ51;K7EJ83;A0A087WZZ9;I6L9I5;Q6LC83;Q8IWB3;E7ESI2;B4DDL9;A0A2R8Y644;H0YAZ9;A0A0S2Z355;A0A024RB10;Q9BWF9;Q6IAW3;A0A090N7W4;A0A024QZP7;A0A024RB77;Q5H9N4;A0A024RBB6;Q9BVE2;A0A024R8R3;E7EUK8;B4DK59;G3V5T9;B4DHU6;B4DER5;E5RGN0;Q96GA5;Q59G02;Q9BRL4;A0A087WZU2;F5H6Z0;B4DGP5;A0A024R996;A0A140VK97;A0A024R…	Sa1-IAA	-0.837497	0.872685	-0.959679	2	0.438485	0.828125	NA	0.642857	0	B5BU53	Cyclin-dependent kinase 9	CDK9	NA	NA	ATP binding [GO:0005524]; protein serine/threonine kinase activity [GO:0004674]	NA	47
478	B5BU72;A0A024R5L7;A8K5U9;A0A024R5P1;Q13492;E9PJT1;E9PK13	Sa1-IAA	Inf	NA	NA	NA	NA	0	oneConditionMissing	0.714286	0	B5BU72	Phosphatidylinositol-binding clathrin assembly protein	PICALM	clathrin coat assembly [GO:0048268]; endocytosis [GO:0006897]	clathrin-coated vesicle [GO:0030136]	1-phosphatidylinositol binding [GO:0005545]; clathrin binding [GO:0030276]	NA	18
479	B5BU99;Q9Y5A9;S4R3J8;S4R3V3	Sa1-IAA	-0.581209	0.469827	-1.23707	7	0.255948	0.761092	NA	0.285714	0	B5BU99	YTH domain-containing family protein 2	YTHDF2	NA	NA	RNA binding [GO:0003723]	NA	66
480	B5BUB1;A0A384MTR5;Q9Y265;E7ETR0;B3KRS7;H7C4G5;J3QLR1;H7C4I3	Sa1-IAA	-0.00366391	0.648779	-0.00564739	7	0.995652	0.996403	NA	0.376623	0	B5BUB1	RuvB-like 1	RUVBL1	DNA recombination [GO:0006310]; DNA repair [GO:0006281]	Ino80 complex [GO:0031011]; NuA4 histone acetyltransferase complex [GO:0035267]; R2TP complex [GO:0097255]	5'-3' DNA helicase activity [GO:0043139]; ATP binding [GO:0005524]	NA	152
481	B5BUD2;P35250;Q75MT5;H7C5P4;A0A087WVY3;H7C5S7;H7C5P1;H7C5Q7;F8WC37;H7C5A0;H7C5G4	Sa1-IAA	-1.01134	0.679943	-1.48738	5	0.197071	0.731578	NA	0.571429	0	B5BUD2	Replication factor C subunit 2	RFC2	DNA replication [GO:0006260]	NA	ATP binding [GO:0005524]; DNA binding [GO:0003677]	NA	56
482	B5MBX1;A8K356;A8K9C0;A0A0C4DFT8;B4DFY8;G3XAA4;B3KPL2;Q9NQC1;D6R9B8;C9J929	Sa1-IAA	#NAME?	NA	NA	NA	NA	0	oneConditionMissing	0.714286	0	B5MBX1	Protein Jade-2	JADE2;PHF15	NA	NA	metal ion binding [GO:0046872]	NA	1
483	B5MCF9;B2RDF2;O00541;B3KXD6;B3KTZ6;H7C267;H7BYY8	Sa1-IAA	-0.900641	0.391675	-2.29946	7	0.055035	0.618718	NA	0.4375	0	B5MCF9	Pescadillo homolog	PES1	maturation of 5.8S rRNA from tricistronic rRNA transcript (SSU-rRNA, 5.8S rRNA, LSU-rRNA) [GO:0000466]; maturation of LSU-rRNA from tricistronic rRNA transcript (SSU-rRNA, 5.8S rRNA, LSU-rRNA) [GO:0000463]	chromosome [GO:0005694]; cytosol [GO:0005829]; nucleolus [GO:0005730]; nucleoplasm [GO:0005654]; preribosome, large subunit precursor [GO:0030687]	ribonucleoprotein complex binding [GO:0043021]	NA	57
484	B5MDE0;A0A291FGD9;Q96AA3	Sa1-IAA	-0.212464	0.530807	-0.400266	1	0.757616	0.941025	NA	0.571429	0	B5MDE0	Protein RFT1 homolog	RFT1	dolichol-linked oligosaccharide biosynthetic process [GO:0006488]	integral component of membrane [GO:0016021]	NA	NA	0
485	B5MDF5;P62826;J3KQE5;H0YFC6;F5H018;A0A087X0W0;Q96QB7;Q0EFC9;B4DV51	Sa1-IAA	Inf	NA	NA	NA	NA	0	oneConditionMissing	0.785714	0	B5MDF5	GTP-binding nuclear protein Ran	RAN	nucleocytoplasmic transport [GO:0006913]; protein transport [GO:0015031]	nucleus [GO:0005634]	GTPase activity [GO:0003924]; GTP binding [GO:0005525]	NA	154
486	B7Z2Y7;H3BS42;B2RD90;A0A024QZC8;Q9H5H4	Sa1-IAA	-0.162389	1.34276	-0.120937	1	0.923381	0.989268	NA	0.714286	0	B7Z2Y7	Zinc finger protein 768	ZNF768;FLJ23436	transcription by RNA polymerase II [GO:0006366]	nucleus [GO:0005634]	DNA binding [GO:0003677]; metal ion binding [GO:0046872]	NA	10
487	B7Z3Z1;Q5UGI2;A0A0A0MRY2;Q5BJG6;B7Z3W2;B0QZE2;B7Z2J6;E7ENI9;J3QKD2;Q15326;Q6PJR5	Sa1-IAA	-0.519934	NA	NA	0	NA	NA	NA	0.714286	0	B7Z3Z1	Zinc finger MYND domain-containing protein 11	ZMYND11	NA	NA	NA	NA	8
488	B7Z4V2;V9HW84;A0A384P5G6;Q8N1C8;P38646;B7Z1V7;D6RA73;D6RJI2;A0A3B3ITI4;A1XP52;B7Z4T3;H0YBG6	Sa1-IAA	0.159134	1.23726	0.128618	0	NA	NA	NA	0.571429	0	B7Z4V2	Stress-70 protein, mitochondrial	HEL-S-124m;HSPA9	protein folding [GO:0006457]	NA	ATP binding [GO:0005524]; unfolded protein binding [GO:0051082]	NA	307
489	B7Z597;B3GQS7;A0A024R3X4;P10809;B7Z5E7;B7Z4F6;B7Z532;Q53SE2;E7ESH4;E7EXB4;A0A0S2Z415;C9JL25;B9VPB4;B9VP19;Q53QD5;C9JL19;C9JCQ4	Sa1-IAA	-0.371172	0.37189	-0.998069	8	0.347473	0.790424	NA	0.584416	0	B7Z597	60 kDa heat shock protein, mitochondrial	HSPD1	protein refolding [GO:0042026]; response to cold [GO:0009409]	NA	ATP binding [GO:0005524]; isomerase activity [GO:0016853]	B7Z597;B3GQS7;A0A024R3X4;P10809;B7Z5E7;B7Z4F6;B7Z532;Q53SE2;E7ESH4;E7EXB4;A0A0S2Z415;C9JL25;B9VPB4;B9VP19;Q53QD5;C9JL19;C9JCQ4	231
490	B7Z6F7;A0A024R0R6;Q92797;A0A087WUE9;Q4LE61;M0R3C7;M0R1C2;O75402;M0R180;M0QXP5;M0R039	Sa1-IAA	-1.49675	0.648404	-2.30836	6	0.0604045	0.618718	NA	0.571429	0	B7Z6F7	Symplekin	SYMPK;SYMPK variant protein	mRNA processing [GO:0006397]	nucleus [GO:0005634]	NA	NA	45
491	B7Z6P1;P68133;P68032;D2JYH4;A8K3K1;P63267;P62736;Q7Z7J6;A6NL76;B3KW67;Q13707;B4DUI8;F8WB63;B8ZZJ2;C9JFL5;F6UVQ4;F6QUT6;B7Z6I1;Q562R1;B3KPP5;F8WCH0;K4EQ44;K4EP00;K4ENJ5;A0A173GMX0;Q562Y4;Q562X7;Q562X6;Q562X4;Q562X2;Q562X1;Q562X0;Q562W2;Q562U1;Q562U0;Q562T8;Q562T6;Q562T5;Q562T4;Q562T3;Q562T0;Q562R6;Q562R5;Q562R0;Q562Q9;Q562Q8;Q562Q6;Q562Q4;Q562Q2;Q562Q0;Q562P8;Q562L3	Sa1-IAA	1.42031	1.40246	1.01273	0	NA	NA	NA	0.714286	0	B7Z6P1	Actin, alpha skeletal muscle;Actin, alpha cardiac muscle 1;Actin, gamma-enteric smooth muscle;Actin, aortic smooth muscle	ACTA1;ACTC1;ACTA2;ACTG2	NA	NA	NA	NA	354
492	B7Z6Q6;A8K3S3;A0A140VKF1;Q99661;Q5JR89;Q5JR91;Q8N5N1;B7Z7M6	Sa1-IAA	0.772808	0.903903	0.854968	1	0.549674	0.868716	NA	0.571429	0	B7Z6Q6	Kinesin-like protein;Kinesin-like protein KIF2C	KIF2C	microtubule-based movement [GO:0007018]	cytoplasm [GO:0005737]; microtubule [GO:0005874]	ATP binding [GO:0005524]; microtubule binding [GO:0008017]; microtubule motor activity [GO:0003777]	NA	23
493	B7Z7P2;Q5H9Q2;Q59EA0	Sa1-IAA	0.457018	0.472904	0.966407	3	0.405127	0.817982	NA	0.428571	0	B7Z7P2	NA	NA	NA	NA	NA	NA	0
494	B7Z7T5;H3BND8;B7Z855;B7ZAX6;Q6U8A4;Q93009;F5H2X1;B7Z842	Sa1-IAA	Inf	NA	NA	NA	NA	0	oneConditionMissing	0.857143	0	B7Z7T5	Ubiquitin carboxyl-terminal hydrolase;Ubiquitin carboxyl-terminal hydrolase 7	USP7	protein deubiquitination [GO:0016579]; ubiquitin-dependent protein catabolic process [GO:0006511]	NA	thiol-dependent ubiquitinyl hydrolase activity [GO:0036459]	NA	65
495	B7Z7X9;Q92833	Sa1-IAA	-0.958392	0.322119	-2.97527	4	0.0409299	0.589366	NA	0.285714	0	B7Z7X9	Protein Jumonji	JARID2	NA	nucleus [GO:0005634]	DNA binding [GO:0003677]	NA	0
496	B7Z8H0;Q96F82;Q13415;A8K794	Sa1-IAA	-0.69357	0.497064	-1.39533	4	0.235396	0.751955	NA	0.285714	0	B7Z8H0	Origin recognition complex subunit 1	ORC1L;ORC1	DNA replication [GO:0006260]	nucleus [GO:0005634]	ATP binding [GO:0005524]; chromatin binding [GO:0003682]; DNA binding [GO:0003677]	NA	4
497	B7Z9T5;A0A024R632;H3BRB3;Q14807;H3BTH5	Sa1-IAA	1.0949	1.075	1.01852	0	NA	NA	NA	0.714286	0	B7Z9T5	Kinesin-like protein;Kinesin-like protein KIF22	KIF22	DNA repair [GO:0006281]; microtubule-based movement [GO:0007018]	cytoplasm [GO:0005737]; microtubule [GO:0005874]	ATP binding [GO:0005524]; DNA binding [GO:0003677]; microtubule binding [GO:0008017]; microtubule motor activity [GO:0003777]	NA	23
498	B7ZAF0;Q5JP53;A0A384NYT8;Q5SU16;B4DY90;P07437;Q6LC01;Q9BUU9;B4E052;Q5ST81;B4DMU8;B7ZAK1;B4DQN9;Q1KSF8;Q96B85;B4DXZ5;B4DMJ5;Q6P602;A4UCT2;A4UCU2;M0R2D3;G3V2A3;M0R042;M0QYM7	Sa1-IAA	0.868798	0.333559	2.60463	2	0.121185	0.649655	NA	0.642857	0	B7ZAF0	Tubulin beta chain	TUBB;XTP3TPATP1	microtubule-based process [GO:0007017]	cytoplasm [GO:0005737]; microtubule [GO:0005874]	GTPase activity [GO:0003924]; GTP binding [GO:0005525]; structural constituent of cytoskeleton [GO:0005200]	NA	382
499	B7ZLC9;Q8TEQ6;Q58EZ8	Sa1-IAA	-0.121564	0.794724	-0.152964	6	0.883441	0.982717	NA	0.628571	0	B7ZLC9	Gem-associated protein 5	GEMIN5	NA	NA	NA	NA	44
500	B7ZLP5;A8K329;Q15424;B7Z2Z1;B7Z1C7;B7Z2F6;B7Z5X3;B7Z959;A0PJ47;Q14151;B7Z2H3;K7ES42;K7EII0	Sa1-IAA	-0.63117	0.443516	-1.42311	7	0.197708	0.731578	NA	0.540816	0	B7ZLP5	Scaffold attachment factor B1	SAFB	regulation of mRNA processing [GO:0050684]; regulation of transcription, DNA-templated [GO:0006355]	NA	RNA binding [GO:0003723]	NA	77
501	B7ZLQ5;P28370;A0A0A0MRP6;Q86UA8;D7EZH4	Sa1-IAA	-0.289304	0.183803	-1.57399	7	0.15949	0.689323	NA	0.628571	0	B7ZLQ5	Probable global transcription activator SNF2L1	SMARCA1	ATP-dependent chromatin remodeling [GO:0043044]; brain development [GO:0007420]; neuron differentiation [GO:0030182]; regulation of neural precursor cell proliferation [GO:2000177]	intracellular membrane-bounded organelle [GO:0043231]; nucleoplasm [GO:0005654]; NURF complex [GO:0016589]	ATP binding [GO:0005524]; DNA binding [GO:0003677]; helicase activity [GO:0004386]; nucleosome binding [GO:0031491]	NA	48
502	B7ZLZ7;B3KMB1;A8K984;A0A024R158;O95347;Q2KQ72;Q05BV1;Q7Z2X1;Q6IPS5;B3KM27;Q5T821;Q05D74;A0JLM9;Q32Q15;Q6P712	Sa1-IAA	-0.892753	0.365695	-2.44125	2	0.134706	0.658061	NA	0.571429	0	B7ZLZ7	Structural maintenance of chromosomes protein;Structural maintenance of chromosomes protein 2	SMC2;SMC2L1	cell cycle [GO:0007049]; chromosome condensation [GO:0030261]	chromosome [GO:0005694]; nucleus [GO:0005634]	ATP binding [GO:0005524]	NA	82
503	B7ZMF2;Q9NVI1;H3BP78;F8W7R3;B3KNW8;H3BT54;H3BMG4;H3BS60;H3BN35;H3BQE2	Sa1-IAA	-1.28517	0.324011	-3.96643	3	0.0286325	0.55158	NA	0.571429	0	B7ZMF2	Fanconi anemia group I protein	FANCI	DNA repair [GO:0006281]	NA	NA	NA	33
504	B7ZML1;Q3L8U1;Q461N2;H3BTW3;B4DR07;Q8N4Q2;H3BSP3;Q8NAR9	Sa1-IAA	Inf	NA	NA	NA	NA	0	oneConditionMissing	0.714286	0	B7ZML1	Chromodomain-helicase-DNA-binding protein 9	CHD9	chromatin organization [GO:0006325]	NA	ATP binding [GO:0005524]; DNA helicase activity [GO:0003678]	NA	19
505	B9EG70;Q14207;Q7KYL7;E9PKJ1	Sa1-IAA	1.28552	0.738333	1.74111	2	0.22379	0.742967	NA	0.761905	0	B9EG70	Protein NPAT	NPAT	NA	NA	NA	NA	4
506	B9EIS5;B4DJ00;B4DWY1;E5RGQ4;REV__Q16043;Q9P1R8;REV__A2RRS3;REV__Q07283	Sa1-IAA	0.337264	0.631105	0.534402	7	0.609609	0.886838	NA	0	0	B9EIS5	NA	PCM1	cilium assembly [GO:0060271]; microtubule anchoring at centrosome [GO:0034454]; protein localization to centrosome [GO:0071539]	centrosome [GO:0005813]	NA	NA	31
507	B9EK46;Q9P2M7	Sa1-IAA	0.157375	NA	NA	0	NA	NA	NA	0.714286	0	B9EK46	Cingulin	CGN	NA	myosin complex [GO:0016459]	motor activity [GO:0003774]	NA	6
508	C9IZN7;D3DVL7;B4DU42;Q969Z0;C9J7P5;B3KM73;C9J618;C9J5A2;C9J347;B3KRS4;B3KMT3	Sa1-IAA	0.826036	0.695548	1.1876	1	0.445538	0.828125	NA	0.428571	0	C9IZN7	Protein TBRG4	TBRG4	NA	mitochondrion [GO:0005739]	NA	NA	9
509	C9J0D1;A0A494C189;Q71UI9;P0C0S5;C9J386	Sa1-IAA	-1.26867	0.638305	-1.98756	3	0.141018	0.6651	NA	0.666667	0	C9J0D1	Histone H2A;Histone H2A.V;Histone H2A.Z	H2AFV;H2AFZ	NA	nucleosome [GO:0000786]; nucleus [GO:0005634]	DNA binding [GO:0003677]; protein heterodimerization activity [GO:0046982]	C9J0D1;A0A494C189;Q71UI9;P0C0S5;C9J386	244
510	C9J2Y9;B4DHJ3;P30876;C9J4M6;B4DH29;A0A1W2PPT5;B4DR40	Sa1-IAA	0.324259	0.226663	1.43058	2	0.288838	0.783886	NA	0.642857	0	C9J2Y9	DNA-directed RNA polymerase;DNA-directed RNA polymerase II subunit RPB2	POLR2B	transcription, DNA-templated [GO:0006351]	nucleoplasm [GO:0005654]	DNA binding [GO:0003677]; DNA-directed 5'-3' RNA polymerase activity [GO:0003899]; metal ion binding [GO:0046872]; ribonucleoside binding [GO:0032549]	NA	58
511	C9J7T7;A0A384DVL6;C9JE98;A0A024RBU9;C9J0Q5;A0A024RBS3;Q9Y618;A0A481PGK9;C9JQE8;H7C184;H7C0P3;H7C1J7;Q9BT61	Sa1-IAA	-0.026894	0.419784	-0.0640663	6	0.950999	0.99615	NA	0.380952	0	C9J7T7	Nuclear receptor corepressor 2	NCOR2	NA	nucleoplasm [GO:0005654]	NA	NA	14
512	C9J9K3;A0A024R2P0;A0A0C4DG17;P08865;Q96RS2;A0A024R7P5;F8WD59;A0A024RCF2	Sa1-IAA	-0.597141	0.895114	-0.667111	5	0.534248	0.868716	NA	0.414286	0	C9J9K3	40S ribosomal protein SA	RPSA;LOC388524	translation [GO:0006412]	cytoplasm [GO:0005737]; small ribosomal subunit [GO:0015935]	structural constituent of ribosome [GO:0003735]	NA	160
513	C9JA69;A8K6U2;Q8WY36;D3DN56;C9J8D0;Q9P043;Q9H6G9;Q6ZNU6;Q9H6A7;H7C1Q0;C9JYU6;Q9NRU5;C9JZA0	Sa1-IAA	-0.760435	0.354884	-2.14277	4	0.0987801	0.618718	NA	0.571429	0	C9JA69	HMG box transcription factor BBX	BBX	NA	cytosol [GO:0005829]; nucleoplasm [GO:0005654]	DNA binding [GO:0003677]	NA	20
514	C9JAG1;G1UI38;Q8WU57;C9J9I1;A0A087WW58;Q9C0D9	Sa1-IAA	-0.573671	0.304889	-1.88157	5	0.118637	0.649655	NA	0.357143	0	C9JAG1	Ethanolaminephosphotransferase 1	EPT1;SELI	NA	integral component of membrane [GO:0016021]	NA	NA	6
515	C9JAW5;B2R4G1;A0A024R2M9;C9JNU6;Q9Y241	Sa1-IAA	0.117197	0.442775	0.264688	4	0.804329	0.959369	NA	0.285714	0	C9JAW5	HIG1 domain family member 1A, mitochondrial	HIGD1A	NA	integral component of membrane [GO:0016021]; mitochondrial inner membrane [GO:0005743]	NA	NA	7
516	C9JG35;C9J092;C9JCJ0;B2RDP4;A8K1I4;A0A024QZD9;Q96K58	Sa1-IAA	#NAME?	NA	NA	NA	NA	0	oneConditionMissing	0.714286	0	C9JG35	Zinc finger protein 668	ZNF668	NA	NA	NA	NA	0
517	C9JJZ7;H7BXH8;A0A0S2Z610;B7WPG3;C9IYN3;A8K894;D6W592;A0A0S2Z6K1;A0A0S2Z5U3;Q8WVV9	Sa1-IAA	Inf	NA	NA	NA	NA	0	oneConditionMissing	0.857143	0	C9JJZ7	Heterogeneous nuclear ribonucleoprotein L-like	HNRNPLL;HNRPLL	NA	NA	RNA binding [GO:0003723]	NA	21
518	C9JP00;A0A0A0MQX8;Q9NR56	Sa1-IAA	-0.9875	0.709092	-1.39263	3	0.257999	0.763527	NA	0.285714	0	C9JP00	Muscleblind-like protein 1	MBNL1	NA	cytosol [GO:0005829]; nucleoplasm [GO:0005654]	metal ion binding [GO:0046872]	NA	5
519	C9JP85;A0A024R770;A0A024R774;Q16656	Sa1-IAA	#NAME?	NA	NA	NA	NA	0	oneConditionMissing	0.857143	0	C9JP85	Nuclear respiratory factor 1	NRF1	regulation of transcription by RNA polymerase II [GO:0006357]	NA	DNA-binding transcription factor activity [GO:0003700]	NA	1
520	C9JPC9;B4DWG7;A4D2N6;Q9H9J4;A4D2N7	Sa1-IAA	#NAME?	NA	NA	NA	NA	0	oneConditionMissing	0.928571	0	C9JPC9	Ubiquitin carboxyl-terminal hydrolase;Ubiquitin carboxyl-terminal hydrolase 42	USP42	protein deubiquitination [GO:0016579]; ubiquitin-dependent protein catabolic process [GO:0006511]	NA	thiol-dependent ubiquitinyl hydrolase activity [GO:0036459]	NA	12
521	C9JRD9;A0A3B3IT53;A0A3B3IS56;A0A3B3IRP4;A0A3B3IUF2;A0A3B3ISM8;A0A3B3ISX3;A0A3B3IUB1;Q13144	Sa1-IAA	Inf	NA	NA	NA	NA	0	oneConditionMissing	0.857143	0	C9JRD9	Translation initiation factor eIF-2B subunit epsilon	EIF2B5	NA	NA	NA	NA	13
522	C9JVB6;Q7L0Y3	Sa1-IAA	-1.44732	1.49698	-0.966831	1	0.510735	0.862131	NA	0.571429	0	C9JVB6	Mitochondrial ribonuclease P protein 1	TRMT10C	NA	mitochondrial nucleoid [GO:0042645]; mitochondrion [GO:0005739]; nucleoplasm [GO:0005654]	tRNA (guanine(9)-N(1))-methyltransferase activity [GO:0052905]	NA	21
523	C9JXB8;C9JNW5;V9HW01;P83731	Sa1-IAA	1.23307	1.10722	1.11366	5	0.316077	0.783886	NA	0.571429	0	C9JXB8	60S ribosomal protein L24	RPL24;HEL-S-310	NA	cytosol [GO:0005829]; endoplasmic reticulum [GO:0005783]	NA	NA	195
524	C9JXI1;C9JVP0;Q9UPW0	Sa1-IAA	Inf	NA	NA	NA	NA	0	oneConditionMissing	0.857143	0	C9JXI1	Forkhead box protein J3	FOXJ3	NA	NA	NA	NA	0
525	D0PNI1;P63104;E7EX29;E7ESK7;E5RIR4;E9PD24;E7EVZ2;E5RGE1;Q6LD62;B0AZS6;B7Z2E6;H0YB80;Q2F831	Sa1-IAA	-0.637668	NA	NA	0	NA	NA	NA	0.714286	0	D0PNI1	14-3-3 protein zeta/delta	YWHAZ	protein targeting [GO:0006605]; regulation of cell death [GO:0010941]; synaptic target recognition [GO:0008039]	hippocampal mossy fiber to CA3 synapse [GO:0098686]; nucleus [GO:0005634]	monooxygenase activity [GO:0004497]; protein domain specific binding [GO:0019904]	NA	180
526	D2CFK9;Q9BZE4;Q53GS0;Q8N4P8;B4DHR2;O60747;Q5T3R7	Sa1-IAA	-0.744776	0.215851	-3.45042	7	0.0106852	0.468305	NA	0.459184	0	D2CFK9	Nucleolar GTP-binding protein 1	GTPBP4	maturation of LSU-rRNA from tricistronic rRNA transcript (SSU-rRNA, 5.8S rRNA, LSU-rRNA) [GO:0000463]	cytosol [GO:0005829]; nuclear membrane [GO:0031965]; nucleolus [GO:0005730]; nucleoplasm [GO:0005654]	GTP binding [GO:0005525]	NA	56
527	D3DPC4;Q53R41	Sa1-IAA	#NAME?	NA	NA	NA	NA	0	oneConditionMissing	0.714286	0	D3DPC4	FAST kinase domain-containing protein 1	FLJ21901;FASTKD1	regulation of mitochondrial mRNA stability [GO:0044528]	NA	NA	NA	0
528	D3DQF6;U3KPZ7;Q9P2N5;B3KY61	Sa1-IAA	-1.34266	NA	NA	0	NA	NA	NA	0.714286	0	D3DQF6	RNA-binding protein 27	POU4F3;RBM27	NA	NA	RNA binding [GO:0003723]	NA	62
529	D3DR32;Q96Q89;A8K324;A0A0A0MSJ5	Sa1-IAA	-0.0406023	0.177652	-0.228549	7	0.825753	0.964066	NA	0.538095	0	D3DR32	Kinesin-like protein;Kinesin-like protein KIF20B	MPHOSPH1;KIF20B	microtubule-based movement [GO:0007018]; regulation of mitotic nuclear division [GO:0007088]	cytoplasm [GO:0005737]; cytoskeleton [GO:0005856]	ATP binding [GO:0005524]; microtubule binding [GO:0008017]; microtubule motor activity [GO:0003777]	NA	9
530	D3DS95;Q59FI9;P30050;Q76P68	Sa1-IAA	0.703926	0.83614	0.841875	1	0.55452	0.868716	NA	0.285714	0	D3DS95	60S ribosomal protein L12	hCG_21173;RPL12;cICK0721Q.2	translation [GO:0006412]	ribosome [GO:0005840]	structural constituent of ribosome [GO:0003735]	NA	201
531	D3DS96;Q9NRL2;Q59G54;B3KND8;Q05CW0;Q32ND1;A0A087WWN7	Sa1-IAA	0.0480199	0.332028	0.144626	7	0.889082	0.984548	NA	0.509317	0	D3DS96	Bromodomain adjacent to zinc finger domain protein 1A	BAZ1A	chromatin remodeling [GO:0006338]	nucleus [GO:0005634]	metal ion binding [GO:0046872]	NA	28
532	D3DTH7;A1L180	Sa1-IAA	0.496518	0.938202	0.529223	1	0.690124	0.926349	NA	0.571429	0	D3DTH7	NA	MYO1C	NA	myosin complex [GO:0016459]	actin binding [GO:0003779]; ATP binding [GO:0005524]; motor activity [GO:0003774]	NA	66
533	D3DTY9;Q59GW5	Sa1-IAA	2.26333	1.22955	1.84079	1	0.316809	0.783886	NA	0.571429	0	D3DTY9	NA	TRIM25	NA	NA	NA	NA	29
534	D3DUJ0;Q8TA92;Q9Y4W6;B3KPL7;Q658U5;K7EP56;B7Z651;A0A0U1RQN6;B7Z636;E9PHW9;A0A024RDI4;I6L894;A0A024RDK2;Q01484	Sa1-IAA	-0.493961	0.458928	-1.07634	4	0.342365	0.790424	NA	0.571429	0	D3DUJ0	AFG3-like protein 2	AFG3L2	NA	integral component of membrane [GO:0016021]	ATP binding [GO:0005524]; metalloendopeptidase activity [GO:0004222]; zinc ion binding [GO:0008270]	NA	21
535	D3DVQ1;O95202	Sa1-IAA	-0.30365	0.457866	-0.663185	7	0.528439	0.868378	NA	0.547619	0	D3DVQ1	LETM1 and EF-hand domain-containing protein 1, mitochondrial	LETM1	NA	integral component of membrane [GO:0016021]; mitochondrial inner membrane [GO:0005743]	antiporter activity [GO:0015297]; calcium ion binding [GO:0005509]; ribosome binding [GO:0043022]	NA	18
536	D6R938;A0A024RDK3;E9PBG7;E9PF82;B7Z2B0;Q13557;Q92991;H0Y9J2;Q4G1A8	Sa1-IAA	-0.200737	0.359081	-0.559029	3	0.615159	0.88837	NA	0.571429	0	D6R938	Calcium/calmodulin-dependent protein kinase type II subunit delta	CAMK2D	NA	NA	ATP binding [GO:0005524]; calmodulin binding [GO:0005516]; calmodulin-dependent protein kinase activity [GO:0004683]	NA	15
537	D6R9I9;P61221	Sa1-IAA	-1.09622	0.377766	-2.90185	3	0.0624086	0.618718	NA	0.285714	0	D6R9I9	ATP-binding cassette sub-family E member 1	ABCE1	NA	NA	ATPase activity [GO:0016887]; ATP binding [GO:0005524]	NA	40
538	D6R9P3;D6RD18;B4DMY3;D6RBZ0;Q53F64;Q99729	Sa1-IAA	-0.602198	0.471517	-1.27715	3	0.291428	0.783886	NA	0.428571	0	D6R9P3	Heterogeneous nuclear ribonucleoprotein A/B	HNRNPAB	NA	cytoplasm [GO:0005737]; nucleoplasm [GO:0005654]	RNA binding [GO:0003723]	NA	206
539	D6RAA6;A6QKW0;A0A024R9W7;P57088;H0Y8N0	Sa1-IAA	Inf	NA	NA	NA	NA	0	oneConditionMissing	0.857143	0	D6RAA6	Transmembrane protein 33	TMEM33;SHINC3	NA	integral component of membrane [GO:0016021]	NA	NA	34
540	D6RAF8;A0A024RDF4;A0A024RDF3;Q14103;H0Y8G5;H0YA96;Q12771;B4DTC3;A0A024RDB4;D6RD83;D6RF44;D6RBQ9;B4E0W4	Sa1-IAA	-1.71312	0.481199	-3.56012	6	0.0119255	0.468305	NA	0.5	0	D6RAF8	Heterogeneous nuclear ribonucleoprotein D0	HNRNPD;HNRPD	NA	cytoplasm [GO:0005737]; nucleus [GO:0005634]	RNA binding [GO:0003723]	NA	216
541	D6RCT1;D6RBP6;D6RA49;D6RFL5;D6R9M7;D6REZ6;D6RBS9;D6R9D6;A0A024R9W3;B7ZLP7;A0AV96	Sa1-IAA	-0.241154	1.47337	-0.163675	0	NA	NA	NA	0.571429	0	D6RCT1	RNA-binding protein 47	RBM47;FLJ20273	cytidine to uridine editing [GO:0016554]	NA	RNA binding [GO:0003723]	NA	1
542	D6RE10;D6RBR5;D6RBM2;A1L3X0	Sa1-IAA	-0.558023	0.160124	-3.48495	1	0.177897	0.717917	NA	0.714286	0	D6RE10	Elongation of very long chain fatty acids protein;Elongation of very long chain fatty acids protein 7	ELOVL7	fatty acid elongation, saturated fatty acid [GO:0019367]; very long-chain fatty acid biosynthetic process [GO:0042761]	endoplasmic reticulum membrane [GO:0005789]; integral component of membrane [GO:0016021]	3-oxo-arachidoyl-CoA synthase activity [GO:0102336]; 3-oxo-cerotoyl-CoA synthase activity [GO:0102337]; 3-oxo-lignoceronyl-CoA synthase activity [GO:0102338]; fatty acid elongase activity [GO:0009922]; very-long-chain 3-ketoacyl-CoA synthase activity [GO:0102756]	NA	0
543	D6W539;F5GZQ3;B4DY96;P55084;B4DDC9;C9K0M0;C9JEY0;C9JE81;Q92799;B5MD38	Sa1-IAA	-0.00732206	NA	NA	0	NA	NA	NA	0.714286	0	D6W539	Trifunctional enzyme subunit beta, mitochondrial;3-ketoacyl-CoA thiolase	HADHB	NA	NA	transferase activity, transferring acyl groups other than amino-acyl groups [GO:0016747]	NA	47
544	D6W5C0;B2ZZ89;A0A087WUZ3;Q01082;K9MS24;F8W6C1;B4DIF8	Sa1-IAA	-0.781834	0.587616	-1.33052	5	0.240799	0.756479	NA	0.619048	0	D6W5C0	Spectrin beta chain, non-erythrocytic 1	SPTBN1	actin filament capping [GO:0051693]	spectrin [GO:0008091]	actin binding [GO:0003779]; phospholipid binding [GO:0005543]; structural constituent of cytoskeleton [GO:0005200]	NA	143
545	D6W625;Q13111;K7EJF1;K7EPA1	Sa1-IAA	1.53364	1.4416	1.06384	2	0.398849	0.817982	NA	0.714286	0	D6W625	Chromatin assembly factor 1 subunit A	CHAF1A	cell cycle [GO:0007049]; DNA repair [GO:0006281]; DNA replication [GO:0006260]	nucleus [GO:0005634]	NA	NA	15
546	E1NZA1	Sa1-IAA	-3.12146	0.362948	-8.60032	1	0.0736919	0.618718	NA	0.571429	0	E1NZA1	NA	PRIC295	positive regulation of kinase activity [GO:0033674]; regulation of translation [GO:0006417]	NA	protein kinase binding [GO:0019901]; protein kinase regulator activity [GO:0019887]; ribosome binding [GO:0043022]	NA	0
547	E4W6B6;B2R4D8;A0A024R1V4;P61353;K7ELC7;K7EQQ9;K7ERY7	Sa1-IAA	0.502109	0.916994	0.54756	2	0.638936	0.903537	NA	0.571429	0	E4W6B6	60S ribosomal protein L27	RPL27	translation [GO:0006412]	ribosome [GO:0005840]; rough endoplasmic reticulum [GO:0005791]	structural constituent of ribosome [GO:0003735]	NA	159
548	E5KNY5;P42704;B4DSR0;B8ZZ38;A0A0C4DG06;C9JCA9;H7C3W8;A0A0C4DG51;A8K6U0;A0A024R746;Q9NP80	Sa1-IAA	-0.520556	0.596558	-0.872598	7	0.411811	0.821036	NA	0.497835	0	E5KNY5	Leucine-rich PPR motif-containing protein, mitochondrial	LRPPRC	negative regulation of mitochondrial RNA catabolic process [GO:0000961]; regulation of mitochondrial translation [GO:0070129]	mitochondrion [GO:0005739]; nucleus [GO:0005634]; ribonucleoprotein complex [GO:1990904]	RNA binding [GO:0003723]; single-stranded DNA binding [GO:0003697]	NA	130
549	E5KRK5;P28331;B4DJ81;A0A291FIZ5;Q9P1A0;F8WDL5;C9JPQ5	Sa1-IAA	1.43229	1.7278	0.828968	5	0.44488	0.828125	NA	0.619048	0	E5KRK5	NADH-ubiquinone oxidoreductase 75 kDa subunit, mitochondrial	NDUFS1	ATP synthesis coupled electron transport [GO:0042773]	mitochondrial inner membrane [GO:0005743]; mitochondrion [GO:0005739]	4 iron, 4 sulfur cluster binding [GO:0051539]; electron transfer activity [GO:0009055]; NADH dehydrogenase (ubiquinone) activity [GO:0008137]	NA	19
550	E5RHW4;A0A384ME54;O94905;E5RJ09	Sa1-IAA	Inf	NA	NA	NA	NA	0	oneConditionMissing	0.714286	0	E5RHW4	Erlin-2	ERLIN2	steroid metabolic process [GO:0008202]	cytosol [GO:0005829]; endoplasmic reticulum [GO:0005783]; integral component of membrane [GO:0016021]; plasma membrane [GO:0005886]	ubiquitin protein ligase binding [GO:0031625]	NA	45
551	E7DVW5;Q01469;I6L8B7	Sa1-IAA	-2.46779	1.54228	-1.60009	0	NA	NA	NA	0.714286	0	E7DVW5	Fatty acid-binding protein, epidermal	FABP5	glucose homeostasis [GO:0042593]; glucose metabolic process [GO:0006006]; negative regulation of glucose transmembrane transport [GO:0010829]; phosphatidylcholine biosynthetic process [GO:0006656]; positive regulation of cold-induced thermogenesis [GO:0120162]; positive regulation of peroxisome proliferator activated receptor signaling pathway [GO:0035360]; regulation of prostaglandin biosyntheti…	cytoplasm [GO:0005737]; extracellular space [GO:0005615]; nucleus [GO:0005634]; postsynaptic density [GO:0014069]	retinoic acid binding [GO:0001972]	NA	38
552	E7EN32;A0A024R5E3;A0A024R5D2;O00255;Q9UE24;A0A024R570;E7ENS2;E7EPR4;E7ET29;G9G6R5	Sa1-IAA	0.321341	0.5141	0.625056	4	0.565823	0.872464	NA	0.428571	0	E7EN32	Menin	MEN1	NA	cytosol [GO:0005829]; nucleoplasm [GO:0005654]	DNA binding [GO:0003677]	NA	3
553	E7EN86;P52747;Q9H176;B7Z851;E7EX64;B4DHU8;B4DGI1;A0A024RCW5;A0A024RCU3;A0A024RD10;P36508;C9J2G7;C9JCG1;E9PLS7;E9PPB0;C9JRS3;E9PLN4;E9PS81;E9PMY8;E9PJF2;C9JTC5;Q59HH4	Sa1-IAA	-0.202026	0.985939	-0.204907	3	0.85076	0.967783	NA	0.642857	0	E7EN86	Zinc finger protein 143;Zinc finger protein 76	ZNF143;ZNF76	NA	NA	NA	NA	0
554	E7ENR5;H0Y714;Q96G21;B8ZZ47;B9A008	Sa1-IAA	Inf	NA	NA	NA	NA	0	oneConditionMissing	0.857143	0	E7ENR5	U3 small nucleolar ribonucleoprotein protein IMP4	IMP4	NA	nucleolus [GO:0005730]	NA	NA	5
555	E7EPN9;Q9Y520;H7C5N8;A0A2R8YET2;A0A2R8Y7F4;B4E3S2;A0A2R8Y424	Sa1-IAA	-0.309114	0.737439	-0.419172	4	0.696622	0.926579	NA	0.702381	0	E7EPN9	Protein PRRC2C	PRRC2C	NA	cytosol [GO:0005829]	NA	NA	67
556	E7EQV3;A0A024R9C1;P11940;B4DZW4;E7ERJ7;B4DQX0;A0A087WTT1;B3KT93;A0A024R9E2;H0YAR2;Q5VX58;Q3ZCS4;Q9H361;Q2VIP3;H0YAP2;H0YBN4;H0YB86;H0YB75;E5RGH3;H0YAS6;E5RH24;E5RJB9;H0YAS7;H0YAW6;Q4VXU2;H0YC10;E5RHG7;L0R533;H0YCC8;B4DM75;Q96DU9	Sa1-IAA	0.0962121	0.472864	0.203467	7	0.844559	0.964066	NA	0.561224	0	E7EQV3	Polyadenylate-binding protein;Polyadenylate-binding protein 1;Polyadenylate-binding protein 3	PABPC1;PABPC3	NA	cytosol [GO:0005829]	RNA binding [GO:0003723]	NA	172
557	E7ER27;A0A2R8YD50;E7EWE5;B4DSD0;B4DDM5;B2R659;A0A0S2Z4J1;P51659;Q59H27;E7EPL9;A0A2R8Y7L2;G5E9S2;B3KSP2;E7ET17;B4DI68;A0A2R8YDT8;A0A2R8YF45	Sa1-IAA	-0.959466	0.61043	-1.57179	3	0.214042	0.733344	NA	0.285714	0	E7ER27	Peroxisomal multifunctional enzyme type 2;(3R)-hydroxyacyl-CoA dehydrogenase;Enoyl-CoA hydratase 2	HSD17B4	NA	NA	oxidoreductase activity [GO:0016491]	NA	68
558	E7ERS3;B4DTK7;Q86VM9;B4DZ24;H3BP01;H3BPD0;B3KRL4;Q86YU5;H3BRH3;H3BRN6;REV__Q86VM9;REV__E7ERS3;REV__B4DTK7	Sa1-IAA	-0.00634601	0.256261	-0.0247638	7	0.980935	0.996403	NA	0.428571	0	E7ERS3	Zinc finger CCCH domain-containing protein 18	ZC3H18	NA	nuclear speck [GO:0016607]	NA	NA	54
559	E7ESY4;Q13330;A0A024R6P5;Q59FW1;H0Y4T7;Q86TR6;Q9BRL8;F8W9Y9;E9PCS8;Q53RX8;H7C3F3;H0YIT0;Q53SC0;E9PF88	Sa1-IAA	-0.119098	0.919361	-0.129544	3	0.905125	0.984803	NA	0.607143	0	E7ESY4	Metastasis-associated protein MTA1	MTA1	regulation of transcription, DNA-templated [GO:0006355]	cytosol [GO:0005829]; intracellular membrane-bounded organelle [GO:0043231]; nucleoplasm [GO:0005654]	chromatin binding [GO:0003682]; sequence-specific DNA binding [GO:0043565]; zinc ion binding [GO:0008270]	NA	53
560	E7ETK0;A0A2R8Y849;A0A2R8YD14;P62847;A0A2R8Y8A0	Sa1-IAA	#NAME?	NA	NA	NA	NA	0	oneConditionMissing	0.785714	0	E7ETK0	40S ribosomal protein S24	RPS24	translation [GO:0006412]	ribosome [GO:0005840]	structural constituent of ribosome [GO:0003735]	NA	179
561	E7EUU4;E7EX73;E9PGM1;B4DGF1;B2RU10;B2RU06;Q4LE58;Q04637;B4DSI9;Q96I65;H7C044;C9J6B6;C9JF13;C9K073;C9J2Z7;H7C0V6;C9JIH5;C9JWH9;C9JHW9;O95065;B4DZE1;B4DH17;A0A0A0MSA7;A0A0U1RQK7;Q59GJ0;O43432	Sa1-IAA	-0.293092	0.399242	-0.734121	6	0.490557	0.8518	NA	0.605042	0	E7EUU4	Eukaryotic translation initiation factor 4 gamma 1	EIF4G1;EIF4G1 variant protein	NA	cytoplasm [GO:0005737]; cytosol [GO:0005829]	eukaryotic initiation factor 4E binding [GO:0008190]; mRNA binding [GO:0003729]; translation initiation factor activity [GO:0003743]	NA	102
562	E7EV99;E7ENY0;P35611;Q96D30;A0A0A0MSR2;Q4TT76;H0Y9H2;D6RJE2;D6RAH3;D6RF25;B4DPW4	Sa1-IAA	0.398762	0.535369	0.744837	1	0.592443	0.880473	NA	0.642857	0	E7EV99	Alpha-adducin	ADD1;LA04NC01-25A3.2-001	NA	cytoskeleton [GO:0005856]	NA	NA	42
563	E7EVX8;Q8WWY3;B4DWW8;E7EU94;E7ESX0;E7EN72	Sa1-IAA	-0.248456	0.717827	-0.346122	5	0.74334	0.941025	NA	0.6	0	E7EVX8	U4/U6 small nuclear ribonucleoprotein Prp31	PRPF31	spliceosomal tri-snRNP complex assembly [GO:0000244]	Cajal body [GO:0015030]; nucleoplasm [GO:0005654]; spliceosomal complex [GO:0005681]; U4/U6 x U5 tri-snRNP complex [GO:0046540]	RNA binding [GO:0003723]	NA	145
564	E7EXA6;Q96S08;A0A0D9SF58;Q8WVB6;B4DEY3;F8WCC1	Sa1-IAA	0.345267	0.376432	0.917209	4	0.410932	0.821036	NA	0.428571	0	E7EXA6	Chromosome transmission fidelity protein 18 homolog	CHTF18;RUVBL	NA	cytosol [GO:0005829]; nucleoplasm [GO:0005654]	ATP binding [GO:0005524]	NA	3
565	E9KL35;P63244;J3KPE3;H0YAF8;D6RAC2;D6RHH4;H0Y8W2;D6REE5;D6RAU2;E9PD14;D6RFX4;D6RFZ9;D6R9Z1;H0YAM7;D6R9L0;D6RF23;B4E0C3;B4DVD2;D6RGK8;H0Y9P0;D6RHJ5;D6R909;H0Y8R5;D6RBD0;B4DWC6;D6RDI0	Sa1-IAA	-0.403577	0.38325	-1.05304	6	0.332872	0.790424	NA	0.47619	0	E9KL35	Guanine nucleotide-binding protein subunit beta-2-like 1;Guanine nucleotide-binding protein subunit beta-2-like 1, N-terminally processed	GNB2L1	negative regulation of hydrogen peroxide-induced neuron death [GO:1903208]; pigmentation [GO:0043473]; translation [GO:0006412]	cytoplasm [GO:0005737]; dendrite [GO:0030425]; intracellular membrane-bounded organelle [GO:0043231]; neuronal cell body [GO:0043025]; nucleoplasm [GO:0005654]	ion channel inhibitor activity [GO:0008200]	NA	135
566	E9PC69;Q7KZI7;A8K2S4;A0A024R5B2;A0A140VJP1;E7ETY4;A9CP04;A0A024R555;F5H6N2;F5H4F6;Q5DNC6;X5DNR8;B4DIB3;X5D2M4;A0A087X0I6;Q9P0L2;K7EK17;K7EKG8;F5H4J8;Q9H051;H0YKJ3;H0YNV4;Q59FB8;O75271;X5D7J4;Q96L34	Sa1-IAA	0.257832	0.564438	0.456794	7	0.661656	0.912563	NA	0.516484	0	E9PC69	Serine/threonine-protein kinase MARK2	MARK2;Par1b	NA	dendrite [GO:0030425]; nucleoplasm [GO:0005654]; plasma membrane [GO:0005886]	ATP binding [GO:0005524]; protein kinase activity [GO:0004672]	NA	6
567	E9PC90;H1UBN2;P14635;D6RHI0	Sa1-IAA	0.0581451	0.233796	0.2487	2	0.8268	0.964066	NA	0.428571	0	E9PC90	G2/mitotic-specific cyclin-B1	CCNB1;CCNB1V	NA	cytosol [GO:0005829]; host cell nucleus [GO:0042025]	NA	NA	17
568	E9PD53;B3KXX5;Q9NTJ3;B3KVJ5;Q6NSG3;Q58F29;Q6P169;C9JR83;C9JVD8;C9J578;C9J9E4	Sa1-IAA	-0.684417	0.539533	-1.26854	6	0.251599	0.761092	NA	0.589286	0	E9PD53	Structural maintenance of chromosomes protein;Structural maintenance of chromosomes protein 4	SMC4	cell cycle [GO:0007049]; chromosome organization [GO:0051276]	chromosome [GO:0005694]; cytosol [GO:0005829]; nuclear speck [GO:0016607]	ATP binding [GO:0005524]	NA	90
569	E9PDF6;B0I1S9;O43795;E7EQD9;Q05CR5;C9JYW1;H7C2Y7;B3KQI2;C9K0I9;Q14777;C9JUP5;B2R643;Q9UBC5	Sa1-IAA	-0.400761	0.635319	-0.630803	6	0.551425	0.868716	NA	0.714286	0	E9PDF6	Unconventional myosin-Ib	MYO1B	NA	myosin complex [GO:0016459]; plasma membrane [GO:0005886]	actin binding [GO:0003779]; ATP binding [GO:0005524]; motor activity [GO:0003774]	NA	69
570	E9PF10;B4DLT2;A0A024R071;O75694;B3KMK3	Sa1-IAA	-0.107877	0.607397	-0.177606	3	0.870348	0.973302	NA	0.52381	0	E9PF10	Nuclear pore complex protein Nup155	NUP155	NA	nuclear membrane [GO:0031965]; nuclear pore [GO:0005643]	structural constituent of nuclear pore [GO:0017056]	NA	49
571	E9PHV5;P28290;B4E2E5;E7EUL7;B3KXT1;B4DP45;B4DQT6;H7BZ26	Sa1-IAA	-0.520165	0.347224	-1.49807	7	0.177788	0.717917	NA	0.526531	0	E9PHV5	Sperm-specific antigen 2	SSFA2	NA	cytosol [GO:0005829]; nucleoplasm [GO:0005654]; plasma membrane [GO:0005886]	actin binding [GO:0003779]; signaling receptor binding [GO:0005102]	NA	23
572	E9PIE3;Q969G5	Sa1-IAA	#NAME?	NA	NA	NA	NA	0	oneConditionMissing	0.857143	0	E9PIE3	Protein kinase C delta-binding protein	PRKCDBP	NA	caveola [GO:0005901]	NA	NA	2
573	E9PJ24;B7ZM65;F8WEF5;B7ZM66;A0A0J9YYB5;A0A0J9YWD5;A0A024RCA1;Q9P1Y6;A0A0J9YX88;A1L197	Sa1-IAA	-0.57903	0.638315	-0.907122	4	0.415648	0.821036	NA	0.714286	0	E9PJ24	PHD and RING finger domain-containing protein 1	PHRF1;KIAA1542	NA	NA	metal ion binding [GO:0046872]	NA	22
574	E9PJD9;Q9BQQ5;E9PLL6;E9PLX7;Q6NZ52;P46776	Sa1-IAA	-0.349311	1.46344	-0.238692	3	0.826721	0.964066	NA	0.285714	0	E9PJD9	60S ribosomal protein L27a	RPL27A;L27a	translation [GO:0006412]	ribosome [GO:0005840]	structural constituent of ribosome [GO:0003735]	NA	198
575	E9PLT0;Q9GZV0;A0A024R0K2;A0A024R0E2;O75534;Q8WU01;Q9UG93;Q9UG12;Q96L66	Sa1-IAA	#NAME?	NA	NA	NA	NA	0	oneConditionMissing	0.857143	0	E9PLT0	Cold shock domain-containing protein E1	CSDE1;DKFZp586J0620	NA	cytosol [GO:0005829]; Golgi apparatus [GO:0005794]; plasma membrane [GO:0005886]	nucleic acid binding [GO:0003676]	NA	67
576	E9PMD7;A0A140VJS9;B3KXM2;P62136;E7ETD8;F5H1L6;B4E163;F5H037;B7ZB67;B4DJ75	Sa1-IAA	Inf	NA	NA	NA	NA	0	oneConditionMissing	0.857143	0	E9PMD7	Serine/threonine-protein phosphatase;Serine/threonine-protein phosphatase PP1-alpha catalytic subunit	PPP1CA;PPP1CB	cell division [GO:0051301]; glycogen metabolic process [GO:0005977]	nucleolus [GO:0005730]; nucleoplasm [GO:0005654]; protein phosphatase type 1 complex [GO:0000164]; PTW/PP1 phosphatase complex [GO:0072357]	protein serine/threonine phosphatase activity [GO:0004722]	NA	123
577	E9PMQ9;A8K7U5;E9PSI1;B7Z6C9;O15321;E9PJC4;E9PQY7;E9PS99;E9PL78;E9PJM1;G3V1B9;B4E3A9	Sa1-IAA	0.775534	0.225389	3.44087	0	NA	NA	NA	0.714286	0	E9PMQ9	Transmembrane 9 superfamily member 1	TM9SF1	NA	integral component of membrane [GO:0016021]	NA	NA	0
578	E9PMR6;A0A2X0SFF5;Q9NZN5;B4DGW2;B4E2K6	Sa1-IAA	-0.456372	NA	NA	0	NA	NA	NA	0.714286	0	E9PMR6	Rho guanine nucleotide exchange factor 12	ARHGEF12	G protein-coupled receptor signaling pathway [GO:0007186]; Rho protein signal transduction [GO:0007266]	cytoplasm [GO:0005737]; membrane [GO:0016020]	G protein-coupled receptor binding [GO:0001664]; GTPase activator activity [GO:0005096]; Rho guanyl-nucleotide exchange factor activity [GO:0005089]	NA	2
579	E9PMS6;B7Z8W3;A0A1P7ZIM8;A0A0A0MTE2;E9PMT2;F8WD26;F8J2B5;J3KP06;Q8WWI1;H0YE95;E9PMP7;H0Y424	Sa1-IAA	0.7579	0.920259	0.823573	3	0.47055	0.838806	NA	0.714286	0	E9PMS6	LIM domain only protein 7	LMO7	regulation of cell adhesion [GO:0030155]; regulation of signaling [GO:0023051]	integral component of membrane [GO:0016021]	metal ion binding [GO:0046872]	NA	34
580	E9PN91;E9PMW7;E9PPR1;E9PL12;E9PL71;E9PQ49;E9PI39;E9PK01;P29692;E9PNW6;E9PKK3;E9PK72;E9PJD0;E9PIZ1;E9PK06;H0YCK7;E9PQZ1;Q9BW34;A0A087X1X7;Q71RH4;Q9H7G6;D3DWK1;B2RAR6;E9PRY8	Sa1-IAA	0.861152	0.601939	1.43063	1	0.38837	0.812707	NA	0.571429	0	E9PN91	Elongation factor 1-delta	EEF1D	NA	NA	NA	NA	157
581	E9PNW8;Q9H600;B2RDG1;Q8WVX9	Sa1-IAA	-1.17911	0.739952	-1.59349	1	0.356782	0.790424	NA	0.571429	0	E9PNW8	Fatty acyl-CoA reductase 1	FAR1	lipid metabolic process [GO:0006629]	peroxisomal membrane [GO:0005778]; peroxisome [GO:0005777]	alcohol-forming fatty acyl-CoA reductase activity [GO:0102965]; fatty-acyl-CoA reductase (alcohol-forming) activity [GO:0080019]	NA	14
582	E9PS47;E9PLE4;A0A024RC97;Q9BVG9	Sa1-IAA	-0.0526204	0.631091	-0.08338	0	NA	NA	NA	0.714286	0	E9PS47	Phosphatidylserine synthase 2	PTDSS2	NA	NA	NA	NA	0
583	F1T0I1;O15027;A4QN18;A0A3F2YNX0;A0A3F2YNZ0;A4QN19;X6RGP5;A0A0C4DH09;Q9BV84;Q8N9G1;G1UI25;B4DW51;B4DY06;Q8N2P2;A0PJ75	Sa1-IAA	-0.349941	0.512094	-0.683354	7	0.516356	0.86386	NA	0.483516	0	F1T0I1	Protein transport protein Sec16A	SEC16A	COPII vesicle coating [GO:0048208]; protein transport [GO:0015031]	endoplasmic reticulum membrane [GO:0005789]; Golgi membrane [GO:0000139]	NA	NA	41
584	F1T0L5;Q8N8A6	Sa1-IAA	0.08702	0.340567	0.255515	7	0.80567	0.959392	NA	0.714286	0	F1T0L5	ATP-dependent RNA helicase DDX51	DDX51	NA	NA	ATP binding [GO:0005524]; helicase activity [GO:0004386]; nucleic acid binding [GO:0003676]	NA	10
585	F2Z2B9;B3KRS1;B4DS45;Q53EQ3;Q9BSJ2	Sa1-IAA	0.111554	NA	NA	0	NA	NA	NA	0.714286	0	F2Z2B9	Gamma-tubulin complex component 2	TUBGCP2	microtubule nucleation [GO:0007020]	cytoplasm [GO:0005737]; microtubule [GO:0005874]; microtubule organizing center [GO:0005815]; spindle pole [GO:0000922]	gamma-tubulin binding [GO:0043015]	NA	10
586	F2Z388;A0A024R866;P42766;A4D2M5	Sa1-IAA	-0.304591	0.367696	-0.828377	6	0.439158	0.828125	NA	0.142857	0	F2Z388	60S ribosomal protein L35	RPL35;LOC154880	translation [GO:0006412]	ribosome [GO:0005840]	structural constituent of ribosome [GO:0003735]	NA	156
587	F4ZW66	Sa1-IAA	1.24061	0.526475	2.35645	1	0.255497	0.761092	NA	0.571429	0	F4ZW66	NA	NA	defense response to virus [GO:0051607]	cytoplasm [GO:0005737]; nucleus [GO:0005634]	DNA binding [GO:0003677]; double-stranded RNA binding [GO:0003725]	NA	0
588	F5GYF8;B4DYX7;A6H8W6;O43166;Q5CZ77	Sa1-IAA	Inf	NA	NA	NA	NA	0	oneConditionMissing	0.571429	0	F5GYF8	Signal-induced proliferation-associated 1-like protein 1	SIPA1L1;DKFZp686G1344	actin cytoskeleton reorganization [GO:0031532]; regulation of dendrite morphogenesis [GO:0048814]; regulation of small GTPase mediated signal transduction [GO:0051056]	NA	GTPase activator activity [GO:0005096]	NA	9
589	F5GYV5;H7BZV4;B2RE15;A0A0C4DG62;F8WCT1;F5H7X4;Q8TEM4;Q66PJ3	Sa1-IAA	-0.380572	0.532964	-0.714066	1	0.605229	0.883465	NA	0.571429	0	F5GYV5	ADP-ribosylation factor-like protein 6-interacting protein 4	ARL6IP4;FLJ00169	NA	nuclear speck [GO:0016607]; nucleolus [GO:0005730]	NA	NA	107
590	F5GZP6;B4DFU8;A0A024RB02;Q86W92;H0YGH8	Sa1-IAA	#NAME?	NA	NA	NA	NA	0	oneConditionMissing	0.857143	0	F5GZP6	Liprin-beta-1	PPFIBP1	NA	NA	NA	NA	9
591	F5H0Q6;B3KSZ8;A0A0A0MQS2;Q8N2M8	Sa1-IAA	-1.08641	0.926724	-1.17231	0	NA	NA	NA	0.714286	0	F5H0Q6	CLK4-associating serine/arginine rich protein	CLASRP	NA	nucleoplasm [GO:0005654]	NA	NA	9
592	F5H1H2;F5H2E6;A0A0C4DGG8;Q8IX12;H0YFJ7;F5H3E1	Sa1-IAA	-1.50046	0.582983	-2.57377	3	0.0822233	0.618718	NA	0.619048	0	F5H1H2	Cell division cycle and apoptosis regulator protein 1	CCAR1	regulation of transcription, DNA-templated [GO:0006355]	NA	NA	NA	35
593	F5H867;F5H0E2;B4E3E4;H0YFS2;A0A024R599;B4E2Z3;F5GZS6;J3KPF3;P08195	Sa1-IAA	-0.535863	0.287937	-1.86104	2	0.203801	0.731578	NA	0.285714	0	F5H867	4F2 cell-surface antigen heavy chain	SLC3A2	amino acid transport [GO:0006865]	integral component of membrane [GO:0016021]	NA	NA	58
594	F5H895;A0A0B4J239;F5GXX5;Q53G02;P61803	Sa1-IAA	#NAME?	NA	NA	NA	NA	0	oneConditionMissing	0.857143	0	F5H895	Dolichyl-diphosphooligosaccharide--protein glycosyltransferase subunit DAD1	DAD1	protein glycosylation [GO:0006486]	integral component of membrane [GO:0016021]; oligosaccharyltransferase complex [GO:0008250]	NA	NA	8
595	F8VP72;F8W043;F8W0Q1;F8W057;Q9GZN1	Sa1-IAA	0.259799	0.0236804	10.971	1	0.0578674	0.618718	NA	0.428571	0	F8VP72	Actin-related protein 6	ACTR6	chromatin remodeling [GO:0006338]	nucleus [GO:0005634]	NA	NA	2
596	F8VPD4;P27708;Q53SZ4;G1UI39;Q53SY7	Sa1-IAA	0.9453	0.033895	27.889	1	0.0228171	0.500978	NA	0.571429	0	F8VPD4	CAD protein;Glutamine-dependent carbamoyl-phosphate synthase;Aspartate carbamoyltransferase;Dihydroorotase	CAD	'de novo' pyrimidine nucleobase biosynthetic process [GO:0006207]; 'de novo' UMP biosynthetic process [GO:0044205]; glutamine metabolic process [GO:0006541]	nucleoplasm [GO:0005654]	amino acid binding [GO:0016597]; aspartate carbamoyltransferase activity [GO:0004070]; ATP binding [GO:0005524]; carbamoyl-phosphate synthase (glutamine-hydrolyzing) activity [GO:0004088]; dihydroorotase activity [GO:0004151]; metal ion binding [GO:0046872]	NA	147
597	F8W0I9;F8VVA6;F8VP44;F8W126;Q96EZ8	Sa1-IAA	Inf	NA	NA	NA	NA	0	oneConditionMissing	0.714286	0	F8W0I9	Microspherule protein 1	MCRS1	NA	NA	NA	NA	2
598	F8W0Q9;Q8NEY8;F8WF16;B7Z615;B7Z8L1;F8W6A0;B7Z8M9;B7Z695;F8VPY7;F8VWU8;F8VRK2;REV__K7EN69	Sa1-IAA	-0.55955	0.985091	-0.568019	3	0.609755	0.886838	NA	0.5	0	F8W0Q9	Periphilin-1	PPHLN1	negative regulation of transcription, DNA-templated [GO:0045892]	cytosol [GO:0005829]; nucleoplasm [GO:0005654]	NA	NA	32
599	F8W6I7;A0A024RB53;A0A024RAZ7;P09651;F8VTQ5;B4E0B5;A0A024RC46;Q6IPF2;F8W646;B4DP35;A0A2R8Y4L2;Q9BSM5;F8VYN5;Q3MI39;H0YH80;Q0VAC0;A0A024QZ98;Q32P51	Sa1-IAA	-0.180283	0.535745	-0.336509	7	0.74635	0.941025	NA	0.285714	0	F8W6I7	Heterogeneous nuclear ribonucleoprotein A1;Heterogeneous nuclear ribonucleoprotein A1, N-terminally processed	HNRNPA1;HNRPA1;hCG_2020860	mRNA processing [GO:0006397]; mRNA transport [GO:0051028]; RNA splicing [GO:0008380]	cytoplasm [GO:0005737]; nucleoplasm [GO:0005654]	RNA binding [GO:0003723]	NA	268
600	F8W7C6;A0A087WV22;X1WI28;X5D2T3;P27635;H7C123;H7C2C5;Q96L21;B8A6G2;X5D7P1;X5D2W5;A6QRI9	Sa1-IAA	0.750701	1.86731	0.402023	0	NA	NA	NA	0.714286	0	F8W7C6	60S ribosomal protein L10;60S ribosomal protein L10-like	RPL10;RPL10L	translation [GO:0006412]	cytosol [GO:0005829]; endoplasmic reticulum [GO:0005783]; ribosome [GO:0005840]	structural constituent of ribosome [GO:0003735]	NA	146
601	F8W930;Q9Y6M1;B4DKT5;D3DTW3;Q9NZI8	Sa1-IAA	0.432493	0.657297	0.657987	6	0.534962	0.868716	NA	0.571429	0	F8W930	Insulin-like growth factor 2 mRNA-binding protein 2	IGF2BP2	mRNA transport [GO:0051028]	nucleus [GO:0005634]	mRNA binding [GO:0003729]	NA	80
602	F8WAJ0	Sa1-IAA	-0.969182	0.437059	-2.21751	5	0.0773701	0.618718	NA	0.142857	0	F8WAJ0	NA	DDX31	NA	Golgi apparatus [GO:0005794]; intracellular membrane-bounded organelle [GO:0043231]; nucleolus [GO:0005730]	ATP binding [GO:0005524]; RNA binding [GO:0003723]; RNA helicase activity [GO:0003724]	NA	19
603	F8WBJ6;B2R823;Q9NRX1	Sa1-IAA	0.0699038	0.250372	0.2792	1	0.82667	0.964066	NA	0.428571	0	F8WBJ6	RNA-binding protein PNO1	PNO1	NA	nucleolus [GO:0005730]	RNA binding [GO:0003723]	NA	17
604	F8WCU9;Q68CP9;Q8NBP1;F8W108;F8VWP4;Q96SQ4;Q4G0S8;Q8WV72;A0A087WY37	Sa1-IAA	0.166451	0.589931	0.282154	3	0.796171	0.956022	NA	0.714286	0	F8WCU9	AT-rich interactive domain-containing protein 2	ARID2	regulation of transcription, DNA-templated [GO:0006355]	nucleoplasm [GO:0005654]; plasma membrane [GO:0005886]	DNA binding [GO:0003677]	NA	31
605	F8WDL7	Sa1-IAA	Inf	NA	NA	NA	NA	0	oneConditionMissing	0.857143	0	F8WDL7	NA	C3orf17	NA	NA	NA	NA	6
606	F8WJN3;Q16630;A0A2P1M905;A0A2P1M8Z1;B4DSU9;F8W084;A0A3B3ISW1	Sa1-IAA	-0.411525	0.585375	-0.703012	2	0.554862	0.868716	NA	0.761905	0	F8WJN3	Cleavage and polyadenylation specificity factor subunit 6	CPSF6	mRNA processing [GO:0006397]	cytoplasm [GO:0005737]; mRNA cleavage factor complex [GO:0005849]; nuclear speck [GO:0016607]; nucleoplasm [GO:0005654]	RNA binding [GO:0003723]	NA	137
607	G1UI16;Q29RF7;B3KMN2;Q96DB6;H0Y9L6;H0Y9L9	Sa1-IAA	0.59124	0.43037	1.3738	7	0.211881	0.731578	NA	0.453782	0	G1UI16	Sister chromatid cohesion protein PDS5 homolog A	PDS5A	cell division [GO:0051301]; mitotic sister chromatid cohesion [GO:0007064]	nucleoplasm [GO:0005654]; plasma membrane [GO:0005886]	NA	NA	43
608	G3V203;A0A024QZD1;J3QQ67;Q07020;Q0QEW2;H0YHA7;F8VYV2;B4DDY5;A0A075B7A0;F8VUA6;F8VXR6	Sa1-IAA	-0.976092	0.510189	-1.9132	7	0.097299	0.618718	NA	0.612245	0	G3V203	60S ribosomal protein L18	RPL18	translation [GO:0006412]	cytosol [GO:0005829]; endoplasmic reticulum [GO:0005783]; nucleolus [GO:0005730]; ribosome [GO:0005840]; rough endoplasmic reticulum [GO:0005791]	structural constituent of ribosome [GO:0003735]	NA	191
609	G3V279;A0A024R6D4;P84090	Sa1-IAA	#NAME?	NA	NA	NA	NA	0	oneConditionMissing	0.714286	0	G3V279	Enhancer of rudimentary homolog	ERH	NA	NA	NA	NA	150
610	G3V3A4;Q13573;B7Z9X2;B4DY36;A0A024R6E3;Q6I9S2;B4DEG7;Q6P151;G3V4X8;Q0D2M5;Q9ULA6;G3V5R3	Sa1-IAA	-0.0169692	0.512978	-0.0330798	4	0.975196	0.996403	NA	0.742857	0	G3V3A4	SNW domain-containing protein 1	SNW1	mRNA splicing, via spliceosome [GO:0000398]; Schwann cell proliferation [GO:0014010]	chromatin [GO:0000785]; cytoplasm [GO:0005737]; nucleoplasm [GO:0005654]; SMAD protein complex [GO:0071141]; spliceosomal complex [GO:0005681]	NA	NA	69
611	G3V3B0;REV__C9JZJ5;REV__C9J9C2;REV__C9JK50;REV__Q4V9T5;REV__C9JIR1;REV__Q1RN33;REV__P43358;REV__A0A024RC12;REV__B4DTE6	Sa1-IAA	-0.313096	0.390383	-0.802024	0	NA	NA	NA	0.571429	0	G3V3B0	NA	ACIN1	NA	cytosol [GO:0005829]; nucleoplasm [GO:0005654]; plasma membrane [GO:0005886]	nucleic acid binding [GO:0003676]	NA	73
612	G3V4C1;B3KX96	Sa1-IAA	-0.747146	1.60238	-0.466274	0	NA	NA	NA	0.642857	0	G3V4C1	NA	HNRNPC	NA	NA	RNA binding [GO:0003723]	NA	180
613	G3V529;Q9GZR7;B4DKV2;B4DM03;F5GYL3;B4E300;A0A1W2PRR2;A0A087WXU8;Q7Z4X3;B4DGI6;Q7Z4W0;Q9P054	Sa1-IAA	-0.578637	0.365043	-1.58512	7	0.156958	0.684845	NA	0.648352	0	G3V529	ATP-dependent RNA helicase DDX24	DDX24	NA	NA	ATP binding [GO:0005524]; nucleic acid binding [GO:0003676]; RNA helicase activity [GO:0003724]	NA	40
614	G3V5E1;A0A024R6K1;O75909	Sa1-IAA	-1.3987	NA	NA	0	NA	NA	NA	0.714286	0	G3V5E1	Cyclin-K	CCNK	regulation of transcription by RNA polymerase II [GO:0006357]	host cell nucleus [GO:0042025]; nucleoplasm [GO:0005654]	cyclin-dependent protein serine/threonine kinase regulator activity [GO:0016538]	NA	27
615	G3V5X4;A0A0A0MRE3;D4YW74;Q8WXH0;A0A0C4DGK3;Q6MZP0;Q7Z362;A0A1W2PRN9	Sa1-IAA	-0.381733	0.237363	-1.60822	4	0.183068	0.72394	NA	0.380952	0	G3V5X4	Nesprin-2	SYNE2;TROPH	NA	intermediate filament cytoskeleton [GO:0045111]; meiotic nuclear membrane microtubule tethering complex [GO:0034993]; nuclear membrane [GO:0031965]	actin filament binding [GO:0051015]	NA	10
616	G3XAG1;Q96ME7;B4DES6;B7Z9P6;Q658M0;B4E0X7	Sa1-IAA	-0.469088	0.308539	-1.52035	5	0.188898	0.731578	NA	0.464286	0	G3XAG1	Zinc finger protein 512	ZNF512	NA	NA	NA	NA	24
617	G3XAL9;B7ZM24;Q53ZR1;P55011	Sa1-IAA	-0.0447494	0.506386	-0.0883702	0	NA	NA	NA	0.714286	0	G3XAL9	Solute carrier family 12 member 2	SLC12A2	sodium ion transport [GO:0006814]	integral component of membrane [GO:0016021]	cation:chloride symporter activity [GO:0015377]	NA	5
618	G5E9C0;Q9HB58;Q6PJR6;Q2I9M2;C9JZQ4;E7EM70	Sa1-IAA	-0.826138	0.371357	-2.22465	4	0.0901454	0.618718	NA	0.666667	0	G5E9C0	Sp110 nuclear body protein	SP110	NA	nucleoplasm [GO:0005654]	DNA binding [GO:0003677]	NA	2
619	G5E9G6;B4DYJ6;C9JLD7;H7C1L9;C9JLJ5;C9JSX9;F8W9P3	Sa1-IAA	-0.77837	0.00390051	-199.556	0	NA	NA	NA	0.571429	0	G5E9G6	NA	TRIP12	NA	NA	NA	NA	29
620	G5E9W7;G5E9V5;P82650;Q8NBL6;A8K9Y7;H7C5F2;H7C5H3;Q59GX8;C9J5D8;H7C5L9	Sa1-IAA	-0.448821	0.700568	-0.640653	4	0.556608	0.868716	NA	0.5	0	G5E9W7	28S ribosomal protein S22, mitochondrial	MRPS22	NA	mitochondrion [GO:0005739]; ribosome [GO:0005840]	NA	NA	32
621	G5E9Z2;Q96KA5;B3KY18	Sa1-IAA	Inf	NA	NA	NA	NA	0	oneConditionMissing	0.714286	0	G5E9Z2	Cleft lip and palate transmembrane protein 1-like protein	CLPTM1L	NA	integral component of membrane [GO:0016021]	NA	NA	10
622	G5EA06;A0A024RAJ1;Q92552;D6RH20;B4DT94;Q6PKB3;B4DKI9;Q8N6F2;D6RJC7;E5RJ73	Sa1-IAA	-0.773729	0.583491	-1.32603	6	0.233072	0.751955	NA	0.5	0	G5EA06	28S ribosomal protein S27, mitochondrial	MRPS27	NA	mitochondrion [GO:0005739]; nucleolus [GO:0005730]; nucleoplasm [GO:0005654]; plasma membrane [GO:0005886]; ribosome [GO:0005840]	NA	NA	31
623	H0Y3R4;Q6AW96;A8K0G4;B3KXG4;E7EWN3;Q9C0A6	Sa1-IAA	-0.104823	0.277844	-0.377273	1	0.770332	0.945699	NA	0.571429	0	H0Y3R4	SET domain-containing protein 5	SETD5;DKFZp686A20205	NA	nucleoplasm [GO:0005654]	NA	NA	1
624	H0Y5D5;A0A024R885;B7Z3U7;F5H2X7;Q9ULV3;Q9BTG3;Q5SYW2;A0A494C0L7;B4E0A3;Q96KB7;B0EXJ7;A0A0U1RQR2	Sa1-IAA	-0.252648	0.20796	-1.21489	5	0.278645	0.783886	NA	0.469388	0	H0Y5D5	Cip1-interacting zinc finger protein	CIZ1	NA	nucleoplasm [GO:0005654]; plasma membrane [GO:0005886]	nucleic acid binding [GO:0003676]; zinc ion binding [GO:0008270]	NA	20
625	H0Y6N5;H0Y742;A7MCZ7;E9PHI4;A0A146IHP0;A4D2Q0;O94901;H7C2K3;B4E278;Q5S4N2;H7C3X3	Sa1-IAA	-0.309556	0.757267	-0.40878	7	0.694917	0.926579	NA	0.542857	0	H0Y6N5	SUN domain-containing protein 1	SUN1;UNC84A	NA	integral component of nuclear inner membrane [GO:0005639]; intracellular membrane-bounded organelle [GO:0043231]; meiotic nuclear membrane microtubule tethering complex [GO:0034993]; nuclear membrane [GO:0031965]	NA	NA	14
626	H0Y7N6;F6XFR5;B4DQA3;J3QSX6;A0A494C1P1;A0A494C1G0;B3KSG3;B7Z4H1;F8W8M4;A0A2Z4N5U1;A0A0A0MRL6;A0A3B3IS55;O14639	Sa1-IAA	0.415617	0.441208	0.941998	2	0.44563	0.828125	NA	0.428571	0	H0Y7N6	Actin-binding LIM protein 1	ABLIM1	NA	NA	NA	NA	29
627	H0Y9V7;B4E2Q0;P98194;B4E295;Q59G44;H0Y9S7;H0Y8X9	Sa1-IAA	-0.415514	0.505112	-0.822617	2	0.497197	0.858534	NA	0.571429	0	H0Y9V7	Calcium-transporting ATPase;Calcium-transporting ATPase type 2C member 1	ATP2C1	NA	Golgi apparatus [GO:0005794]; integral component of membrane [GO:0016021]	ATP binding [GO:0005524]; calcium transmembrane transporter activity, phosphorylative mechanism [GO:0005388]; metal ion binding [GO:0046872]	NA	0
628	H0YBR2;H0YBB3;A0A2U3TZN9;D7PBN3;Q6NXG1	Sa1-IAA	-0.668902	0.395175	-1.69267	2	0.232594	0.751955	NA	0.714286	0	H0YBR2	Epithelial splicing regulatory protein 1	ESRP1	NA	nucleus [GO:0005634]	RNA binding [GO:0003723]	NA	0
629	H0YC63;Q9ULD2	Sa1-IAA	Inf	NA	NA	NA	NA	0	oneConditionMissing	0.857143	0	H0YC63	Microtubule-associated tumor suppressor 1	MTUS1	NA	nucleus [GO:0005634]	NA	NA	13
630	H0YE40;H0YD13;B4E2X0;H0Y2P0;B4DN59;A8K309;A0A385KNS5;P16070	Sa1-IAA	1.04245	NA	NA	0	NA	NA	NA	0.714286	0	H0YE40	CD44 antigen	CD44	cell adhesion [GO:0007155]	integral component of membrane [GO:0016021]	hyaluronic acid binding [GO:0005540]	NA	8
631	H0YLP6;Q59F34;H0YMF4;H0YKD8;P46779	Sa1-IAA	-0.38648	0.621276	-0.622075	7	0.553607	0.868716	NA	0.47619	0	H0YLP6	60S ribosomal protein L28	RPL28	translation [GO:0006412]	ribosome [GO:0005840]	structural constituent of ribosome [GO:0003735]	NA	109
632	H0YLX2;B7ZKX1;Q2KHR2	Sa1-IAA	-0.875243	NA	NA	0	NA	NA	NA	0.714286	0	H0YLX2	DNA-binding protein RFX7	RFX7	NA	NA	DNA binding [GO:0003677]; DNA-binding transcription factor activity [GO:0003700]	NA	1
633	H0YN88;A0A075B716;H3BNC9;P08708	Sa1-IAA	#NAME?	NA	NA	NA	NA	0	oneConditionMissing	0.714286	0	H0YN88	40S ribosomal protein S17	RPS17	translation [GO:0006412]	ribosome [GO:0005840]	structural constituent of ribosome [GO:0003735]	NA	177
634	H3BND2;Q96D88;A0A024QZB5;Q9BWN1	Sa1-IAA	Inf	NA	NA	NA	NA	0	oneConditionMissing	0.714286	0	H3BND2	Proline-rich protein 14	PRR14;MGC3121	NA	NA	NA	NA	1
635	H3BPE1;H3BQK9;Q9UPN3;H0Y390;A0A590UJG2;H0Y4F5;H0Y314;Q6ZQZ4;Q96IQ1;Q6IPG6;H0Y6T5;E9PLY5;E9PNZ4;Q8WXX9;Q9H8U2;B4DNC4;Q32Q32	Sa1-IAA	-1.32357	0.149672	-8.84316	1	0.0716856	0.618718	NA	0.571429	0	H3BPE1	Microtubule-actin cross-linking factor 1, isoforms 1/2/3/5	MACF1	intermediate filament cytoskeleton organization [GO:0045104]	cell projection [GO:0042995]; cytoplasm [GO:0005737]; microtubule [GO:0005874]; plasma membrane [GO:0005886]	actin binding [GO:0003779]; calcium ion binding [GO:0005509]; microtubule binding [GO:0008017]	NA	39
636	H3BQ71;H3BMP6;H3BQS6;H3BN05;H3BTS2;H3BQJ0;I3L4F8;H3BUW2;H3BTR4;B3KPB2;A8K662;Q96BT3	Sa1-IAA	-0.816442	0.435617	-1.87422	1	0.312026	0.783886	NA	0.571429	0	H3BQ71	Centromere protein T	CENPT	NA	NA	NA	NA	8
637	H3BQM0;G4U4J3;Q53F79;A0A024R6Q7;Q8NDF8;Q5EBM7;B4DRJ7;E9PC61;B7ZLC1;B4E0T3;B7ZLL4;A0A0X1KG68;Q5XG87	Sa1-IAA	-0.671382	0.480654	-1.39681	6	0.211951	0.731578	NA	0.47619	0	H3BQM0	Non-canonical poly(A) RNA polymerase PAPD5	PAPD5	NA	NA	NA	NA	5
638	H3BRG4;P22695;H3BSJ9;H3BUE4;H3BUI9;A0A087WVZ4;H3BP04	Sa1-IAA	#NAME?	NA	NA	NA	NA	0	oneConditionMissing	0.714286	0	H3BRG4	Cytochrome b-c1 complex subunit 2, mitochondrial	UQCRC2	NA	mitochondrion [GO:0005739]; nucleoplasm [GO:0005654]	metal ion binding [GO:0046872]; metalloendopeptidase activity [GO:0004222]	NA	38
639	H3BS72;Q9P035;H3BPZ1;H3BMZ1;H3BRL8	Sa1-IAA	-0.375475	0.61754	-0.608018	7	0.562375	0.869977	NA	0.464286	0	H3BS72	Very-long-chain (3R)-3-hydroxyacyl-CoA dehydratase 3	HACD3	fatty acid biosynthetic process [GO:0006633]	endoplasmic reticulum [GO:0005783]; endoplasmic reticulum membrane [GO:0005789]; integral component of membrane [GO:0016021]; nuclear membrane [GO:0031965]	3-hydroxy-arachidoyl-CoA dehydratase activity [GO:0102343]; 3-hydroxy-behenoyl-CoA dehydratase activity [GO:0102344]; 3-hydroxy-lignoceroyl-CoA dehydratase activity [GO:0102345]; very-long-chain 3-hydroxyacyl-CoA dehydratase activity [GO:0102158]	NA	55
640	H3BTU3;Q9BQ70;H3BS87;H3BMJ8;Q9H7D3;H3BSP8;B4DVF2;H3BSS3;Q9H384;H3BQ53	Sa1-IAA	-0.341449	0.320188	-1.0664	4	0.346332	0.790424	NA	0.571429	0	H3BTU3	Transcription factor 25	TCF25	NA	NA	NA	NA	2
641	H3BV80;H3BMM9;H3BTC0;D3DU92;Q15287;H3BPG5;A0A024R9P1;H3BMS0;H3BRK4;H3BTV0;H3BNI3;H3BP82;H3BTR6;H3BUG0;H3BTY0;H3BNU7;H3BUL0	Sa1-IAA	-0.832757	0.505174	-1.64845	7	0.143249	0.6651	NA	0.4	0	H3BV80	RNA-binding protein with serine-rich domain 1	RNPS1;hCG_2026745	NA	nuclear speck [GO:0016607]	RNA binding [GO:0003723]	NA	109
642	H7BXY3;A0A024R2T6;Q7L2E3;Q6W6M7	Sa1-IAA	-0.6089	0.290952	-2.09279	7	0.0746621	0.618718	NA	0.461538	0	H7BXY3	Putative ATP-dependent RNA helicase DHX30	DHX30	NA	cytosol [GO:0005829]; mitochondrion [GO:0005739]	ATP binding [GO:0005524]; nucleic acid binding [GO:0003676]; RNA helicase activity [GO:0003724]	NA	62
643	H7BZW6;A0A384ME24;O00422;U3KPY7	Sa1-IAA	0.285111	0.402123	0.709015	0	NA	NA	NA	0.571429	0	H7BZW6	Histone deacetylase complex subunit SAP18	SAP18	NA	cytosol [GO:0005829]; nuclear body [GO:0016604]; nucleoplasm [GO:0005654]	NA	NA	59
644	H7C051;H7BYI2;Q9NZC9	Sa1-IAA	-1.4489	0.291364	-4.97283	2	0.0381399	0.589366	NA	0.428571	0	H7C051	SWI/SNF-related matrix-associated actin-dependent regulator of chromatin subfamily A-like protein 1	SMARCAL1	DNA repair [GO:0006281]; replication fork processing [GO:0031297]	nucleus [GO:0005634]	annealing helicase activity [GO:0036310]	NA	2
645	H7C0J3	Sa1-IAA	0.504593	0.712874	0.707829	4	0.518115	0.86386	NA	0.285714	0	H7C0J3	NA	CHD3	NA	NA	NA	NA	56
646	H7C128;H7C179;B5MCW3;H7C127;B2R5V7;A8K1N6;Q9H0E9;F8WBH2;H0YAH7;B4DMS9;B4DSD6;B4DEG9;B4DN43	Sa1-IAA	Inf	NA	NA	NA	NA	0	oneConditionMissing	0.857143	0	H7C128	Bromodomain-containing protein 8	BRD8	NA	mitochondrion [GO:0005739]; NuA4 histone acetyltransferase complex [GO:0035267]; nucleoplasm [GO:0005654]; Swr1 complex [GO:0000812]	NA	NA	7
647	H7C1M2	Sa1-IAA	1.11815	NA	NA	0	NA	NA	NA	0.714286	0	H7C1M2	NA	SON	regulation of cell cycle [GO:0051726]; regulation of RNA splicing [GO:0043484]	nuclear speck [GO:0016607]	RNA binding [GO:0003723]	NA	NA
648	H7C2A3;O95613	Sa1-IAA	#NAME?	NA	NA	NA	NA	0	oneConditionMissing	0.857143	0	H7C2A3	Pericentrin	PCNT	signal transduction [GO:0007165]	cytoplasm [GO:0005737]; microtubule organizing center [GO:0005815]	molecular adaptor activity [GO:0060090]	H7C2A3;O95613	NA
649	H7C410;A0A024R4D5;A0A384NPH9;P35052;H7C024;H7BZL4;Q59GI7;H7BZE9;C9J4Y6;Q53EX3	Sa1-IAA	-0.659889	0.546087	-1.20839	4	0.293446	0.783886	NA	0.5	0	H7C410	Glypican-1;Secreted glypican-1	GPC1	regulation of signal transduction [GO:0009966]	anchored component of plasma membrane [GO:0046658]; collagen-containing extracellular matrix [GO:0062023]; cytosol [GO:0005829]; extracellular space [GO:0005615]; nucleoplasm [GO:0005654]; plasma membrane [GO:0005886]	NA	NA	8
650	H7C466;B7Z592;Q8WU90	Sa1-IAA	0.424467	0.104688	4.05459	1	0.15394	0.6804	NA	0.571429	0	H7C466	Zinc finger CCCH domain-containing protein 15	ZC3H15	NA	NA	NA	NA	35
651	I3L0T6;Q9HC36;I3L443	Sa1-IAA	0.763135	0.468157	1.63008	5	0.164013	0.699708	NA	0.542857	0	I3L0T6	rRNA methyltransferase 3, mitochondrial	RNMTL1	NA	NA	NA	NA	15
652	I3L0U5;H6QX63;Q6PK04;I3L4F6	Sa1-IAA	-0.85324	0.821283	-1.03891	4	0.357518	0.790424	NA	0.714286	0	I3L0U5	Coiled-coil domain-containing protein 137	CCDC137	NA	fibrillar center [GO:0001650]; nucleolus [GO:0005730]	NA	NA	22
653	I3L0W0;A0A140VK05;B4DN86;Q92667	Sa1-IAA	Inf	NA	NA	NA	NA	0	oneConditionMissing	0.857143	0	I3L0W0	A-kinase anchor protein 1, mitochondrial	AKAP1	regulation of protein kinase A signaling [GO:0010738]	mitochondrion [GO:0005739]	protein kinase A regulatory subunit binding [GO:0034237]; RNA binding [GO:0003723]	NA	23
654	I3L1P8;Q6IBH0;Q02978	Sa1-IAA	-0.319459	0.490623	-0.651128	6	0.539086	0.868716	NA	0.5	0	I3L1P8	Mitochondrial 2-oxoglutarate/malate carrier protein	SLC25A11	NA	integral component of membrane [GO:0016021]	NA	NA	55
655	J3KMX2;B9EGA3;Q92925;J3QWB6	Sa1-IAA	-0.265224	0.363659	-0.72932	4	0.506217	0.861454	NA	0.428571	0	J3KMX2	SWI/SNF-related matrix-associated actin-dependent regulator of chromatin subfamily D member 2	SMARCD2	ATP-dependent chromatin remodeling [GO:0043044]	nucleoplasm [GO:0005654]; SWI/SNF complex [GO:0016514]	NA	NA	12
656	J3KMZ7;B4DQZ5;A0A024QZ48;Q9H0H0;A0A2R8Y4Z6	Sa1-IAA	Inf	NA	NA	NA	NA	0	oneConditionMissing	0.714286	0	J3KMZ7	Integrator complex subunit 2	INTS2	snRNA processing [GO:0016180]	integrator complex [GO:0032039]	NA	NA	0
657	J3KNE0;A6NKT7;Q7Z3J3;H7BZ48;C9J1W9;C9JF75;C9J6W1;I1Z9D1;H0YBN8	Sa1-IAA	0.3828	0.603204	0.63461	5	0.553581	0.868716	NA	0.285714	0	J3KNE0	RanBP2-like and GRIP domain-containing protein 3;RanBP2-like and GRIP domain-containing protein 4	RGPD3;RGPD4	intracellular transport [GO:0046907]	NA	NA	NA	57
658	J3KNV1;O60281;Q6ZS01;Q3MN16;Q6P495;H0YB79;Q3LIB3	Sa1-IAA	0.346601	0.620695	0.558408	2	0.632739	0.899683	NA	0.642857	0	J3KNV1	Zinc finger protein 292	ZNF292	NA	NA	NA	NA	3
659	J3KPS2;A0A494C1T9;Q6ZRV2	Sa1-IAA	0.887043	0.677545	1.3092	1	0.415261	0.821036	NA	0.571429	0	J3KPS2	Protein FAM83H	FAM83H	NA	NA	NA	NA	3
660	J3KRF8;J3KTD6;B2RC06;Q96GD4;J3KRJ2;J3QR41;J3QLN8	Sa1-IAA	0.772965	0.00694171	111.351	0	NA	NA	NA	0.714286	0	J3KRF8	Aurora kinase B	AURKB	histone H3-S28 phosphorylation [GO:0043988]; mitotic spindle assembly checkpoint [GO:0007094]; positive regulation of cytokinesis [GO:0032467]	chromosome passenger complex [GO:0032133]	ATP binding [GO:0005524]; protein serine/threonine kinase activity [GO:0004674]	NA	29
661	J3KS33;B3KY92;A8K8U7;Q9H2G4	Sa1-IAA	-0.652687	0.279683	-2.33367	3	0.101807	0.618718	NA	0.428571	0	J3KS33	Testis-specific Y-encoded-like protein 2	TSPYL2	nucleosome assembly [GO:0006334]	nucleus [GO:0005634]	NA	NA	2
662	J3KSY7;B4DKR6;A0A024R1X0;O15234	Sa1-IAA	-2.26658	0.570067	-3.97598	0	NA	NA	NA	0.714286	0	J3KSY7	Protein CASC3	CASC3	mRNA processing [GO:0006397]; mRNA transport [GO:0051028]; nuclear-transcribed mRNA catabolic process, nonsense-mediated decay [GO:0000184]; regulation of translation [GO:0006417]; RNA splicing [GO:0008380]	dendrite [GO:0030425]; exon-exon junction complex [GO:0035145]; nuclear speck [GO:0016607]; perinuclear region of cytoplasm [GO:0048471]	RNA binding [GO:0003723]	NA	4
663	J3KSZ6;U3KQ35;H3BR06;Q15554;H3BTA7	Sa1-IAA	#NAME?	NA	NA	NA	NA	0	oneConditionMissing	0.857143	0	J3KSZ6	Telomeric repeat-binding factor 2	TERF2	protection from non-homologous end joining at telomere [GO:0031848]	nuclear body [GO:0016604]; nuclear chromosome, telomeric region [GO:0000784]; nucleoplasm [GO:0005654]	telomeric DNA binding [GO:0042162]	NA	17
664	J3KT10;Q9BW27;J3KRC0;B4DYG7;J3KSH3;F5H0W7;B3KW81;J3QLD4;J3QLH0;B7Z3C2;J3QL54	Sa1-IAA	0.299048	0.275625	1.08498	2	0.391303	0.812707	NA	0.571429	0	J3KT10	Nuclear pore complex protein Nup85	NUP85	mRNA transport [GO:0051028]; protein transport [GO:0015031]	nuclear membrane [GO:0031965]; nuclear pore outer ring [GO:0031080]	structural constituent of nuclear pore [GO:0017056]	NA	22
665	J3KTL2;Q07955;Q59FA2;A8K1L8;J3KSR8;B7Z570;A0A2I7N9Y9;J3QQV5;J3KSW7	Sa1-IAA	-0.945765	0.224084	-4.22059	7	0.00393373	0.409061	NA	0.450549	0	J3KTL2	Serine/arginine-rich splicing factor 1	SRSF1	NA	nucleus [GO:0005634]	RNA binding [GO:0003723]	NA	134
666	J3QK86;J3KPG5;F8VU39;Q9UIF9;A0A0C4DGI9;H0YII3;H0YHL2;H0YHQ7;B7Z8F7	Sa1-IAA	-0.2724	0.218191	-1.24844	7	0.252003	0.761092	NA	0.591837	0	J3QK86	Bromodomain adjacent to zinc finger domain protein 2A	BAZ2A	NA	host cell nucleus [GO:0042025]; nucleus [GO:0005634]	DNA binding [GO:0003677]; metal ion binding [GO:0046872]	NA	25
667	J3QK89;Q8IWX8;B4DPM4;Q59ET1;B4DL82	Sa1-IAA	0.341006	0.66187	0.515216	4	0.633567	0.899683	NA	0.666667	0	J3QK89	Calcium homeostasis endoplasmic reticulum protein	CHERP	cellular calcium ion homeostasis [GO:0006874]; RNA processing [GO:0006396]	NA	RNA binding [GO:0003723]	NA	93
668	J3QL05;J3KP15;Q8NAK9;Q53FN0;A0A024R8U5;Q01130;B3KX15;Q6NXQ0;Q8N220;B3KVY2;B3KUF7;B3KUY1	Sa1-IAA	-0.395213	0.471563	-0.838091	7	0.429664	0.823824	NA	0.0714286	0	J3QL05	Serine/arginine-rich splicing factor 2	SRSF2;SFRS2	mRNA processing [GO:0006397]; regulation of alternative mRNA splicing, via spliceosome [GO:0000381]; RNA splicing [GO:0008380]	cytosol [GO:0005829]; nuclear speck [GO:0016607]; nucleoplasm [GO:0005654]	RNA binding [GO:0003723]	NA	135
669	J3QQM1;A0A140VJS3;P62195;Q59GS3;J3KTQ9;J3QSE0	Sa1-IAA	#NAME?	NA	NA	NA	NA	0	oneConditionMissing	0.714286	0	J3QQM1	26S protease regulatory subunit 8	PSMC5	NA	NA	ATP binding [GO:0005524]	NA	116
670	J3QQW9;A8K1U9;Q15022	Sa1-IAA	0.11589	0.401463	0.28867	2	0.800004	0.957282	NA	0.642857	0	J3QQW9	Polycomb protein SUZ12	SUZ12	NA	nuclear body [GO:0016604]; nucleolus [GO:0005730]; nucleoplasm [GO:0005654]	metal ion binding [GO:0046872]	NA	13
671	J3QQY0;J3KSZ8;Q68DK7	Sa1-IAA	-0.487381	0.367393	-1.32659	3	0.276586	0.783886	NA	0.285714	0	J3QQY0	Male-specific lethal 1 homolog	MSL1	histone H4-K16 acetylation [GO:0043984]	MSL complex [GO:0072487]; nucleoplasm [GO:0005654]	NA	NA	0
672	J3QR07;Q96MU7	Sa1-IAA	-1.16932	0.308713	-3.78773	7	0.00682307	0.411913	NA	0.506494	0	J3QR07	YTH domain-containing protein 1	YTHDC1	mRNA splicing, via spliceosome [GO:0000398]; posttranscriptional regulation of gene expression [GO:0010608]	nuclear body [GO:0016604]; nucleoplasm [GO:0005654]; plasma membrane [GO:0005886]	N6-methyladenosine-containing RNA binding [GO:1990247]	NA	23
673	J3QR62	Sa1-IAA	Inf	NA	NA	NA	NA	0	oneConditionMissing	0.714286	0	J3QR62	NA	DDX5	NA	NA	ATP binding [GO:0005524]; nucleic acid binding [GO:0003676]	NA	247
674	J3QS39;J3QTR3;F5H6Q2;Q3MIH3;F5GYU3;F5H2Z3;A0A248RGE3;F5H265;Q5UGI3;B4DV12;F5H388;Q5RKT7;B2RDW1;F5H747;F5GXK7;J3QKN0;Q5U5U6;Q5PY61;Q9UFQ0;Q96C32;Q96MH4;L8B4I8;L8B196;Q96H31;L8B4R0;A8K674;L8B4Z6;L8B4M0;L8B4J3;Q66K58;Q59EM9;P62987;P62979;P0CG47;P0CG48;M0R1V7;Q49A90;M0R1M6;M0R2S1;A0A2R8Y422;J3QSA3;F5GZ39;Q8WYN9	Sa1-IAA	0.157665	0.360921	0.43684	8	0.673779	0.916016	NA	0.238095	0	J3QS39	Ubiquitin-60S ribosomal protein L40;Ubiquitin;60S ribosomal protein L40;Ubiquitin-40S ribosomal protein S27a;Ubiquitin;40S ribosomal protein S27a;Polyubiquitin-B;Ubiquitin;Polyubiquitin-C;Ubiquitin	UBB;RPS27A;UBC;UBA52;HEL112;DKFZp434K0435;UbC	NA	NA	NA	J3QS39;J3QTR3;F5H6Q2;Q3MIH3;F5GYU3;F5H2Z3;A0A248RGE3;F5H265;Q5UGI3;B4DV12;F5H388;Q5RKT7;B2RDW1;F5H747;F5GXK7;J3QKN0;Q5U5U6;Q5PY61;Q9UFQ0;Q96C32;Q96MH4;L8B4I8;L8B196;Q96H31;L8B4R0;A8K674;L8B4Z6;L8B4M0;L8B4J3;Q66K58;Q59EM9;P62987;P62979;P0CG47;P0CG48;M0R1V7;Q49A90;M0R1M6;M0R2S1;A0A2R8Y422;J3QSA3;F5GZ39;Q8WYN9	233
675	J3QS80;Q8N9M1;A0A2R8Y6U9	Sa1-IAA	-0.401604	0.00183386	-218.993	0	NA	NA	NA	0.571429	0	J3QS80	Uncharacterized protein C19orf47	C19orf47	NA	nucleoplasm [GO:0005654]	NA	NA	0
676	K4DI93;Q13620;A6NE76	Sa1-IAA	-0.223312	0.521597	-0.42813	6	0.683498	0.920648	NA	0.47619	0	K4DI93	Cullin-4B	CUL4B	protein ubiquitination [GO:0016567]; ubiquitin-dependent protein catabolic process [GO:0006511]	cullin-RING ubiquitin ligase complex [GO:0031461]; cytosol [GO:0005829]; nucleoplasm [GO:0005654]	ubiquitin protein ligase binding [GO:0031625]	NA	58
677	K7EJE8;K7EKE6;B3KU28;Q2VPA0;B4DPX0;B3KXS5;P36776;E5KMI6;K7ER27;A4VCH6	Sa1-IAA	0.44707	0.106091	4.21402	0	NA	NA	NA	0.642857	0	K7EJE8	Lon protease homolog, mitochondrial;Lon protease homolog	LONP1	cellular response to oxidative stress [GO:0034599]; chaperone-mediated protein complex assembly [GO:0051131]; oxidation-dependent protein catabolic process [GO:0070407]; protein quality control for misfolded or incompletely synthesized proteins [GO:0006515]	cytosol [GO:0005829]; mitochondrial matrix [GO:0005759]; mitochondrion [GO:0005739]; nucleoplasm [GO:0005654]	ATP binding [GO:0005524]; ATP-dependent peptidase activity [GO:0004176]; sequence-specific DNA binding [GO:0043565]; serine-type endopeptidase activity [GO:0004252]	NA	73
678	K7EKI4;K7ELF1;K7ELQ0;K7ES61;A0A024R7C5;X6RAY8;Q9BYD3	Sa1-IAA	-1.27754	0.102864	-12.4197	1	0.0511484	0.615638	NA	0.571429	0	K7EKI4	39S ribosomal protein L4, mitochondrial	MRPL4	translation [GO:0006412]	ribosome [GO:0005840]	structural constituent of ribosome [GO:0003735]	NA	15
679	K7EMM8;D3DUE6;D3DUE7;Q49A26;K7EPU6;K7EQB2	Sa1-IAA	-0.210371	0.399935	-0.526014	7	0.615126	0.88837	NA	0.535714	0	K7EMM8	Putative oxidoreductase GLYR1	GLYR1;N-PAC	NA	cytosol [GO:0005829]; nucleoplasm [GO:0005654]	NAD binding [GO:0051287]; NADP binding [GO:0050661]; oxidoreductase activity [GO:0016491]	NA	53
680	K7EPS7;I3L2Z9;D3DTP5;I3L100;I3L2W2;Q96JN8	Sa1-IAA	-0.33058	0.386892	-0.854451	2	0.482871	0.845646	NA	0.142857	0	K7EPS7	Neuralized-like protein 4	NEURL4;hCG_42028	NA	NA	NA	NA	2
681	K7ERG4;P62316	Sa1-IAA	2.53437	NA	NA	0	NA	NA	NA	0.714286	0	K7ERG4	Small nuclear ribonucleoprotein Sm D2	SNRPD2	mRNA processing [GO:0006397]; RNA splicing [GO:0008380]	cytosol [GO:0005829]; small nuclear ribonucleoprotein complex [GO:0030532]	NA	NA	173
682	L0R512	Sa1-IAA	-0.183843	0.557997	-0.329469	7	0.75144	0.941025	NA	0	0	L0R512	NA	NCAM2	NA	NA	NA	NA	0
683	L7RRS0;O00443;B4DG55;B4DRX6;A0A0C4DGF9;E9PPP3	Sa1-IAA	-0.0894915	0.413021	-0.216675	6	0.835641	0.964066	NA	0.464286	0	L7RRS0	Phosphatidylinositol 4-phosphate 3-kinase C2 domain-containing subunit alpha	PIK3C2A	phosphatidylinositol-mediated signaling [GO:0048015]	nucleoplasm [GO:0005654]	1-phosphatidylinositol-4-phosphate 3-kinase activity [GO:0035005]; ATP binding [GO:0005524]; phosphatidylinositol binding [GO:0035091]	NA	20
684	M0QX10;M0QYY0;M0QX13;M0QZL5;M0R1S1;M0QX64;M0R302;Q8WYU3;M0QXN5;A0A024QZF1;P37198	Sa1-IAA	0.406602	0.742129	0.547886	0	NA	NA	NA	0.714286	0	M0QX10	Nuclear pore glycoprotein p62	NUP62;pp7052;hCG_19665	NA	NA	NA	NA	31
685	M0QXA7	Sa1-IAA	-0.167984	0.345688	-0.485941	5	0.647556	0.905691	NA	0.571429	0	M0QXA7	NA	WIZ	NA	midbody [GO:0030496]; nucleoplasm [GO:0005654]	NA	NA	32
686	M0QXM4;Q71UA6;Q15758;Q59ES3;M0QX44;B4DE27	Sa1-IAA	-0.58892	0.326186	-1.80547	2	0.212757	0.731578	NA	0.571429	0	M0QXM4	Amino acid transporter;Neutral amino acid transporter B(0)	SLC1A5	NA	integral component of membrane [GO:0016021]; plasma membrane [GO:0005886]	symporter activity [GO:0015293]	NA	70
687	M0QYB0;A0A1B0GV68;A0A2X0TVY0;C9JME2;Q9Y4F1	Sa1-IAA	-0.121762	0.347638	-0.350255	3	0.749296	0.941025	NA	0.428571	0	M0QYB0	FERM, RhoGEF and pleckstrin domain-containing protein 1	FARP1	NA	cytoskeleton [GO:0005856]	cytoskeletal protein binding [GO:0008092]	NA	12
688	M0QZC5;P62280;M0R1H6	Sa1-IAA	-0.148061	0.754455	-0.196249	5	0.852142	0.967783	NA	0.628571	0	M0QZC5	40S ribosomal protein S11	RPS11	translation [GO:0006412]	ribosome [GO:0005840]	structural constituent of ribosome [GO:0003735]	NA	151
689	M0QZK8;A0A090N7V5;O75223;H7BZK5;B3KMN7;B8ZZK2	Sa1-IAA	-0.993973	0.542372	-1.83264	0	NA	NA	NA	0.714286	0	M0QZK8	Gamma-glutamylcyclotransferase	C7orf24;GGCT	NA	NA	gamma-glutamylcyclotransferase activity [GO:0003839]	NA	30
690	M0QZM1	Sa1-IAA	-0.780264	0.291103	-2.68037	4	0.0552076	0.618718	NA	0.285714	0	M0QZM1	NA	HNRNPM	mRNA splicing, via spliceosome [GO:0000398]	nucleoplasm [GO:0005654]	RNA binding [GO:0003723]	NA	220
691	M0R0F0;A0A024R4Q8;M0R0R2;P46782;Q53G25;M0QZN2;Q59EK8	Sa1-IAA	0.413231	0.403968	1.02293	6	0.345802	0.790424	NA	0.214286	0	M0R0F0	40S ribosomal protein S5;40S ribosomal protein S5, N-terminally processed	RPS5	translation [GO:0006412]	small ribosomal subunit [GO:0015935]	RNA binding [GO:0003723]; structural constituent of ribosome [GO:0003735]	NA	160
692	M0R0I5;A0A384P5V3;A0A087WTP3;Q92945;M0QXW7;M0QYH3	Sa1-IAA	#NAME?	NA	NA	NA	NA	0	oneConditionMissing	0.714286	0	M0R0I5	Far upstream element-binding protein 2	KHSRP	NA	nucleoplasm [GO:0005654]	RNA binding [GO:0003723]	NA	133
693	M0R210;P62249;M0R3H0;M0QX76;M0R1M5;Q6IPX4	Sa1-IAA	-1.37458	0.682577	-2.0138	4	0.114302	0.644175	NA	0.428571	0	M0R210	40S ribosomal protein S16	RPS16	translation [GO:0006412]	ribosome [GO:0005840]	structural constituent of ribosome [GO:0003735]	NA	211
694	M0R2N5	Sa1-IAA	0.0639461	0.212373	0.301103	2	0.791756	0.953711	NA	0.571429	0	M0R2N5	NA	NA	fatty acid biosynthetic process [GO:0006633]	endoplasmic reticulum membrane [GO:0005789]; integral component of membrane [GO:0016021]	very-long-chain enoyl-CoA reductase activity [GO:0102758]	NA	0
695	M0R3D6;M0R1A7;M0R117;B4DM74;B2R4C0;Q02543;Q32XH3;M0R0P7;B4DM94;B4DUV3;Q53HD3;Q76N54	Sa1-IAA	-0.520763	0.443636	-1.17385	2	0.361313	0.792452	NA	0.714286	0	M0R3D6	60S ribosomal protein L18a	RPL18A	translation [GO:0006412]	ribosome [GO:0005840]	structural constituent of ribosome [GO:0003735]	NA	113
696	M1VE83;M1VKI3;P31431;B4E1S6;M1VRM8	Sa1-IAA	-1.13417	0.769455	-1.47399	7	0.183978	0.72394	NA	0.485714	0	M1VE83	Tyrosine-protein kinase receptor;Syndecan-4;Syndecan	SDC4-ROS1_S4;R34;SDC4-ROS1_S4;R32;SDC4	transmembrane receptor protein tyrosine kinase signaling pathway [GO:0007169]	integral component of membrane [GO:0016021]	ATP binding [GO:0005524]; transmembrane receptor protein tyrosine kinase activity [GO:0004714]	NA	6
697	O00148;B4DX78;K7EQN7;A0A024R7H0;A0A024RCM3;Q13838;Q69YT6;A0A0G2JJZ9;B4DP52;Q5STU3;A0A0D9SEM9;K7EN69;H0Y400;K7EPJ3;F6S4E6;A0A0A0MT12;F6TRA5;F6WLT2;Q59G92;A0A140T9X3;K7ENP6;K7EL56;K7EIL8;A0A140T9L4;A0A140T973;A0A140T9K1;Q7KYK3;B4DF34;F6QYI9;A0A0G2JJL7;A0A140T996;F6R6M7;B4DIJ6;A0A140T9K2;A0A286SD68;A0A286SD67;A0A286SD65;A0A286SD64;A0A286SD63;A0A286SD59;A0A286SD52;A0A0G2JHN7;A0A140T9N3;F6U6E2;F6S2B7;…	Sa1-IAA	0.6012	0.710791	0.845818	7	0.425619	0.823824	NA	0.547619	0	O00148	ATP-dependent RNA helicase DDX39A;Spliceosome RNA helicase DDX39B	DDX39A;DDX39;hCG_2005638;DDX39B	mRNA 3'-end processing [GO:0031124]; mRNA export from nucleus [GO:0006406]; mRNA splicing, via spliceosome [GO:0000398]; RNA export from nucleus [GO:0006405]	cytoplasm [GO:0005737]; membrane [GO:0016020]; nuclear speck [GO:0016607]; nucleoplasm [GO:0005654]; nucleus [GO:0005634]	ATPase activity [GO:0016887]; ATP binding [GO:0005524]; identical protein binding [GO:0042802]; RNA binding [GO:0003723]; RNA helicase activity [GO:0003724]	NA	138
698	O00411;Q4G0F4;B4DZE5;Q59E91;K7EMH3;K7ESD1	Sa1-IAA	-0.21818	0.239576	-0.91069	6	0.397568	0.817982	NA	0.666667	0	O00411	DNA-directed RNA polymerase, mitochondrial;DNA-directed RNA polymerase	POLRMT	mitochondrial transcription [GO:0006390]; mitochondrion organization [GO:0007005]; transcription initiation from mitochondrial promoter [GO:0006391]	mitochondrial DNA-directed RNA polymerase complex [GO:0034245]; mitochondrial matrix [GO:0005759]; mitochondrial nucleoid [GO:0042645]; mitochondrion [GO:0005739]; protein-containing complex [GO:0032991]	DNA-directed 5'-3' RNA polymerase activity [GO:0003899]; mitochondrial promoter sequence-specific DNA binding [GO:0001018]; RNA binding [GO:0003723]; sequence-specific DNA binding [GO:0043565]	NA	30
699	O00425;F8WD15	Sa1-IAA	-0.191803	0.496226	-0.386523	7	0.71059	0.930319	NA	0.25	0	O00425	Insulin-like growth factor 2 mRNA-binding protein 3	IGF2BP3	anatomical structure morphogenesis [GO:0009653]; mRNA transport [GO:0051028]; negative regulation of translation [GO:0017148]; nervous system development [GO:0007399]; regulation of cytokine biosynthetic process [GO:0042035]; regulation of gene expression [GO:0010468]; regulation of mRNA stability [GO:0043488]; regulation of RNA metabolic process [GO:0051252]; translation [GO:0006412]	cytoplasm [GO:0005737]; cytosol [GO:0005829]; nucleus [GO:0005634]	mRNA 3'-UTR binding [GO:0003730]; mRNA 5'-UTR binding [GO:0048027]; mRNA binding [GO:0003729]; RNA binding [GO:0003723]; translation regulator activity [GO:0045182]	NA	87
700	O00566;B3KPV5;U3KQ48	Sa1-IAA	0.00522598	0.842986	0.00619936	7	0.995227	0.996403	NA	0.571429	0	O00566	U3 small nucleolar ribonucleoprotein protein MPP10	MPHOSPH10	negative regulation of phosphatase activity [GO:0010923]; RNA processing [GO:0006396]; RNA splicing [GO:0008380]; RNA splicing, via transesterification reactions [GO:0000375]; rRNA processing [GO:0006364]	chromosome [GO:0005694]; Mpp10 complex [GO:0034457]; nucleolus [GO:0005730]; nucleoplasm [GO:0005654]; small nucleolar ribonucleoprotein complex [GO:0005732]; small-subunit processome [GO:0032040]	RNA binding [GO:0003723]	NA	24
701	O00567;A8K9K6;A0PJ92;A0A494C128;Q5JXT2;Q9BSN3;H0YDU4;H0Y653	Sa1-IAA	-0.897258	0.386567	-2.3211	7	0.0533083	0.615638	NA	0.464286	0	O00567	Nucleolar protein 56	NOP56	rRNA processing [GO:0006364]	box C/D snoRNP complex [GO:0031428]; cytoplasm [GO:0005737]; fibrillar center [GO:0001650]; membrane [GO:0016020]; nucleolus [GO:0005730]; nucleoplasm [GO:0005654]; pre-snoRNP complex [GO:0070761]; small nucleolar ribonucleoprotein complex [GO:0005732]; small-subunit processome [GO:0032040]	cadherin binding [GO:0045296]; histone methyltransferase binding [GO:1990226]; RNA binding [GO:0003723]; snoRNA binding [GO:0030515]	NA	96
702	O00767;Q59GX7	Sa1-IAA	-0.607368	0.00225549	-269.284	0	NA	NA	NA	0.428571	0	O00767	Acyl-CoA desaturase	SCD	fatty-acyl-CoA biosynthetic process [GO:0046949]; monounsaturated fatty acid biosynthetic process [GO:1903966]; positive regulation of cold-induced thermogenesis [GO:0120162]; regulation of cholesterol biosynthetic process [GO:0045540]; response to fatty acid [GO:0070542]; unsaturated fatty acid biosynthetic process [GO:0006636]	endoplasmic reticulum [GO:0005783]; endoplasmic reticulum membrane [GO:0005789]; integral component of endoplasmic reticulum membrane [GO:0030176]; integral component of membrane [GO:0016021]; membrane [GO:0016020]; nucleolus [GO:0005730]	iron ion binding [GO:0005506]; oxidoreductase activity [GO:0016491]; palmitoyl-CoA 9-desaturase activity [GO:0032896]; stearoyl-CoA 9-desaturase activity [GO:0004768]	NA	6
703	O14646;Q7Z4M7;B3KT33;Q3YLD5;A0A0D9SFA3;Q3YLD6;A0A1B0GU59	Sa1-IAA	-0.755691	0.671201	-1.12588	4	0.323195	0.783886	NA	0.693878	0	O14646	Chromodomain-helicase-DNA-binding protein 1	CHD1	chromatin remodeling [GO:0006338]; covalent chromatin modification [GO:0016569]; positive regulation by host of viral transcription [GO:0043923]; regulation of transcription by RNA polymerase II [GO:0006357]	cytoplasm [GO:0005737]; nucleoplasm [GO:0005654]; nucleus [GO:0005634]	ATP binding [GO:0005524]; DNA binding [GO:0003677]; DNA helicase activity [GO:0003678]; methylated histone binding [GO:0035064]	NA	32
704	O14715;J3KQ37;F8W705;Q9NYL8;D3DX70;Q8IWJ2	Sa1-IAA	0.378773	0.196492	1.92767	1	0.30465	0.783886	NA	0.571429	0	O14715	RANBP2-like and GRIP domain-containing protein 8	RGPD8	NLS-bearing protein import into nucleus [GO:0006607]; positive regulation of GTPase activity [GO:0043547]	cytoplasm [GO:0005737]; nuclear pore [GO:0005643]; nucleus [GO:0005634]	Ran GTPase binding [GO:0008536]	NA	52
705	O14976;Q59HA5;B4DS37;D6RE78;D6RAW3;B3KUQ6;Q6P490	Sa1-IAA	Inf	NA	NA	NA	NA	0	oneConditionMissing	0.714286	0	O14976	Cyclin-G-associated kinase	GAK	cell cycle [GO:0007049]; chaperone cofactor-dependent protein refolding [GO:0051085]; clathrin coat disassembly [GO:0072318]; clathrin-coated pit assembly [GO:1905224]; clathrin-dependent endocytosis [GO:0072583]; endoplasmic reticulum organization [GO:0007029]; Golgi organization [GO:0007030]; Golgi to lysosome transport [GO:0090160]; membrane organization [GO:0061024]; negative regulation of ne…	cytoplasm [GO:0005737]; cytosol [GO:0005829]; focal adhesion [GO:0005925]; Golgi apparatus [GO:0005794]; intracellular membrane-bounded organelle [GO:0043231]; membrane [GO:0016020]; perinuclear region of cytoplasm [GO:0048471]; presynapse [GO:0098793]; vesicle [GO:0031982]	ATP binding [GO:0005524]; chaperone binding [GO:0051087]; clathrin binding [GO:0030276]; cyclin binding [GO:0030332]; protein serine/threonine kinase activity [GO:0004674]	NA	21
706	O14980;B3KWD0;B7ZB16;B4DR01;C9J673;C9JKM9;H7BZC5;F8WF71;C9IZS4;C9JQ02;C9JV99	Sa1-IAA	0.138368	0.130164	1.06303	1	0.480557	0.843656	NA	0.642857	0	O14980	Exportin-1	XPO1	intracellular transport of virus [GO:0075733]; mRNA transport [GO:0051028]; negative regulation of transcription by RNA polymerase II [GO:0000122]; nucleocytoplasmic transport [GO:0006913]; protein export from nucleus [GO:0006611]; protein localization to nucleus [GO:0034504]; regulation of centrosome duplication [GO:0010824]; regulation of mRNA stability [GO:0043488]; regulation of proteasomal u…	annulate lamellae [GO:0005642]; Cajal body [GO:0015030]; cytoplasm [GO:0005737]; cytosol [GO:0005829]; host cell [GO:0043657]; intracellular membrane-bounded organelle [GO:0043231]; kinetochore [GO:0000776]; membrane [GO:0016020]; nuclear envelope [GO:0005635]; nuclear membrane [GO:0031965]; nucleolus [GO:0005730]; nucleoplasm [GO:0005654]; nucleus [GO:0005634]; protein-containing complex [GO:003…	nuclear export signal receptor activity [GO:0005049]; protein domain specific binding [GO:0019904]; Ran GTPase binding [GO:0008536]; RNA binding [GO:0003723]	NA	95
707	O15014;E7ERY8;A5PKW6	Sa1-IAA	Inf	NA	NA	NA	NA	0	oneConditionMissing	0.571429	0	O15014	Zinc finger protein 609	ZNF609	muscle organ development [GO:0007517]; positive regulation of neuron migration [GO:2001224]; positive regulation of transcription by RNA polymerase II [GO:0045944]; regulation of myoblast proliferation [GO:2000291]; regulation of transcription by RNA polymerase II [GO:0006357]	nucleoplasm [GO:0005654]; nucleus [GO:0005634]	metal ion binding [GO:0046872]; promoter-specific chromatin binding [GO:1990841]	NA	14
708	O15020;A4QPE4;B2RMN7;A0A024R674;Q59FP5;P11277	Sa1-IAA	0.707435	0.528689	1.33809	2	0.312713	0.783886	NA	0.142857	0	O15020	Spectrin beta chain, non-erythrocytic 2	SPTBN2	actin filament capping [GO:0051693]; adult behavior [GO:0030534]; antigen processing and presentation of exogenous peptide antigen via MHC class II [GO:0019886]; axon guidance [GO:0007411]; cerebellar Purkinje cell layer morphogenesis [GO:0021692]; endoplasmic reticulum to Golgi vesicle-mediated transport [GO:0006888]; MAPK cascade [GO:0000165]; multicellular organism growth [GO:0035264]; synapse…	apical plasma membrane [GO:0016324]; cell junction [GO:0030054]; cytosol [GO:0005829]; extracellular space [GO:0005615]; glutamatergic synapse [GO:0098978]; neuronal cell body [GO:0043025]; presynapse [GO:0098793]; spectrin [GO:0008091]	actin binding [GO:0003779]; cadherin binding [GO:0045296]; phospholipid binding [GO:0005543]; structural constituent of cytoskeleton [GO:0005200]; structural constituent of synapse [GO:0098918]	NA	47
709	O15021;B7Z2K7;B3KU51;B4DKZ2;B4DG22;B1AXG1;B7ZB17;E9PGT3;B4DMN4;A0A384MDW3;V9GXZ1;E7ERL6;A0JLR0;B4DS23;B4DSE5;B4DKT8;H7C1I9;Q15418;P51812;Q9UK32;Q96GX5;O60307;Q9Y2H9;Q6P0Q8	Sa1-IAA	-0.0562391	0.60185	-0.0934437	3	0.931442	0.990127	NA	0.142857	0	O15021	Microtubule-associated serine/threonine-protein kinase 4;Ribosomal protein S6 kinase;Ribosomal protein S6 kinase alpha-1;Ribosomal protein S6 kinase alpha-3;Ribosomal protein S6 kinase alpha-6;Serine/threonine-protein kinase greatwall;Microtubule-associated serine/threonine-protein kinase 3;Microtubule-associated serine/threonine-protein kinase 1;Microtubule-associated serine/threonine-protein ki…	MAST4;RPS6KA3;RPS6KA1;MAST2;RPS6KA6;MASTL;MAST3;MAST1	cytoskeleton organization [GO:0007010]; intracellular signal transduction [GO:0035556]; peptidyl-serine phosphorylation [GO:0018105]	cytoplasm [GO:0005737]	ATP binding [GO:0005524]; magnesium ion binding [GO:0000287]; protein serine/threonine kinase activity [GO:0004674]	NA	2
710	O15042;E7ET15;H0Y8D9;E7EW00;B4DK81;H7C4V2;C9J5L1;C9JDJ7	Sa1-IAA	-0.468974	0.344597	-1.36094	7	0.215723	0.734765	NA	0.6875	0	O15042	U2 snRNP-associated SURP motif-containing protein	U2SURP	mRNA splicing, via spliceosome [GO:0000398]	nucleoplasm [GO:0005654]; nucleus [GO:0005634]	RNA binding [GO:0003723]	NA	104
711	O15047;A0A024QZB1;Q32NE8;A0A0A0MQV9;Q9UPS6	Sa1-IAA	-0.369423	0.385188	-0.959072	4	0.391834	0.812707	NA	0.428571	0	O15047	Histone-lysine N-methyltransferase SETD1A;Histone-lysine N-methyltransferase	SETD1A;hCG_1998636	histone H3-K4 dimethylation [GO:0044648]; histone H3-K4 monomethylation [GO:0097692]; histone H3-K4 trimethylation [GO:0080182]; regulation of chromatin organization [GO:1902275]; regulation of hematopoietic stem cell differentiation [GO:1902036]; regulation of megakaryocyte differentiation [GO:0045652]	histone methyltransferase complex [GO:0035097]; nuclear chromatin [GO:0000790]; nuclear speck [GO:0016607]; nucleoplasm [GO:0005654]; nucleus [GO:0005634]; Set1C/COMPASS complex [GO:0048188]	beta-catenin binding [GO:0008013]; histone methyltransferase activity (H3-K4 specific) [GO:0042800]; RNA binding [GO:0003723]; transcription factor binding [GO:0008134]	NA	5
712	O15091;A0A0A0MTQ0	Sa1-IAA	#NAME?	NA	NA	NA	NA	0	oneConditionMissing	0.857143	0	O15091	Mitochondrial ribonuclease P protein 3	KIAA0391	mitochondrial tRNA 5'-end processing [GO:0097745]; mitochondrial tRNA methylation [GO:0070901]; mitochondrial tRNA processing [GO:0090646]; tRNA 5'-leader removal [GO:0001682]	mitochondrial matrix [GO:0005759]; mitochondrial nucleoid [GO:0042645]; mitochondrial ribonuclease P complex [GO:0030678]; mitochondrion [GO:0005739]; nucleoplasm [GO:0005654]	metal ion binding [GO:0046872]; ribonuclease P activity [GO:0004526]	NA	4
713	O15187;Q2TSD2;A8K5C4;Q01085;A6NKZ9;E7ETJ9;E7ETC0;B4DHS3;Q59G49;Q49AS9	Sa1-IAA	0.0950268	0.375104	0.253334	1	0.842045	0.964066	NA	0.428571	0	O15187	Nucleolysin TIAR	TIAL1	NA	NA	DNA binding [GO:0003677]; RNA binding [GO:0003723]	NA	31
714	O15231;H7BZT5;Q6MZQ8	Sa1-IAA	0.0425841	0.232224	0.183375	4	0.863424	0.972373	NA	0.5	0	O15231	Zinc finger protein 185	ZNF185;DKFZp686B22130	NA	actin cytoskeleton [GO:0015629]; cytoplasm [GO:0005737]; focal adhesion [GO:0005925]	actin filament binding [GO:0051015]; zinc ion binding [GO:0008270]	NA	2
715	O15371;B0QYA8;B0QYA6;B0QYA5;B4E1K8	Sa1-IAA	Inf	NA	NA	NA	NA	0	oneConditionMissing	0.714286	0	O15371	Eukaryotic translation initiation factor 3 subunit D	EIF3D	cap-dependent translational initiation [GO:0002191]; formation of cytoplasmic translation initiation complex [GO:0001732]; IRES-dependent viral translational initiation [GO:0075522]; positive regulation of mRNA binding [GO:1902416]; positive regulation of translation [GO:0045727]; translational initiation [GO:0006413]; viral translational termination-reinitiation [GO:0075525]	cytosol [GO:0005829]; eukaryotic 43S preinitiation complex [GO:0016282]; eukaryotic 48S preinitiation complex [GO:0033290]; eukaryotic translation initiation factor 3 complex [GO:0005852]; eukaryotic translation initiation factor 3 complex, eIF3m [GO:0071541]; membrane [GO:0016020]	mRNA cap binding [GO:0098808]; RNA binding [GO:0003723]; translation initiation factor activity [GO:0003743]	NA	81
716	O43143;B4E0S6	Sa1-IAA	-0.0431327	0.365006	-0.11817	7	0.909252	0.984803	NA	0.512315	0	O43143	Pre-mRNA-splicing factor ATP-dependent RNA helicase DHX15	DHX15	mRNA processing [GO:0006397]; mRNA splicing, via spliceosome [GO:0000398]; response to alkaloid [GO:0043279]; response to toxic substance [GO:0009636]; RNA splicing [GO:0008380]	nuclear speck [GO:0016607]; nucleolus [GO:0005730]; nucleoplasm [GO:0005654]; nucleus [GO:0005634]; spliceosomal complex [GO:0005681]; U12-type spliceosomal complex [GO:0005689]	ATP binding [GO:0005524]; double-stranded RNA binding [GO:0003725]; RNA binding [GO:0003723]; RNA helicase activity [GO:0003724]	NA	168
717	O43290;B4DDH9;B4DP43;E9PQI8;B4DMR4	Sa1-IAA	-0.434762	0.418627	-1.03854	6	0.339046	0.790424	NA	0.517007	0	O43290	U4/U6.U5 tri-snRNP-associated protein 1	SART1	maturation of 5S rRNA [GO:0000481]; mRNA cis splicing, via spliceosome [GO:0045292]; mRNA splicing, via spliceosome [GO:0000398]; positive regulation of cytotoxic T cell differentiation [GO:0045585]; spliceosomal snRNP assembly [GO:0000387]	Cajal body [GO:0015030]; catalytic step 2 spliceosome [GO:0071013]; cytoplasm [GO:0005737]; cytosol [GO:0005829]; Golgi apparatus [GO:0005794]; nuclear speck [GO:0016607]; nucleoplasm [GO:0005654]; nucleus [GO:0005634]; U2-type precatalytic spliceosome [GO:0071005]; U4/U6 x U5 tri-snRNP complex [GO:0046540]	RNA binding [GO:0003723]	NA	85
718	O43491;E9PHY5;Q6ZSX4;I6L9B1;E9PII3;E9PK52;E9PJP4;E9PPC9;E9PQN0;O60642;E9PRG1;E9PIG0;Q9UG62;E9PQD2;E9PN54;E9PMV8;B4DJ76;H0Y5B0;Q6R5J7;Q59FD8;A0A2R8Y5B3	Sa1-IAA	-0.048117	0.262707	-0.183158	3	0.866353	0.972373	NA	0.571429	0	O43491	Band 4.1-like protein 2	EPB41L2	actomyosin structure organization [GO:0031032]; cell cycle [GO:0007049]; cell division [GO:0051301]; cortical actin cytoskeleton organization [GO:0030866]; positive regulation of protein localization to cell cortex [GO:1904778]	cell cortex region [GO:0099738]; cell junction [GO:0030054]; cytoskeleton [GO:0005856]; cytosol [GO:0005829]; extracellular exosome [GO:0070062]; focal adhesion [GO:0005925]; nucleoplasm [GO:0005654]; plasma membrane [GO:0005886]; spectrin [GO:0008091]	actin binding [GO:0003779]; PH domain binding [GO:0042731]; spectrin binding [GO:0030507]; structural molecule activity [GO:0005198]	NA	51
719	O43660;D6RA26;B7Z982	Sa1-IAA	-0.505673	0.456114	-1.10865	3	0.348467	0.790424	NA	0.642857	0	O43660	Pleiotropic regulator 1	PLRG1	mRNA splicing, via spliceosome [GO:0000398]; positive regulation of G1/S transition of mitotic cell cycle [GO:1900087]; protein localization to nucleus [GO:0034504]	catalytic step 2 spliceosome [GO:0071013]; Cul4-RING E3 ubiquitin ligase complex [GO:0080008]; fibrillar center [GO:0001650]; nuclear membrane [GO:0031965]; nuclear speck [GO:0016607]; nucleoplasm [GO:0005654]; nucleus [GO:0005634]; Prp19 complex [GO:0000974]; U2-type catalytic step 2 spliceosome [GO:0071007]	NA	NA	38
720	O43818	Sa1-IAA	-1.74562	0.597923	-2.91947	7	0.0223567	0.500978	NA	0.489796	0	O43818	U3 small nucleolar RNA-interacting protein 2	RRP9	rRNA processing [GO:0006364]	box C/D snoRNP complex [GO:0031428]; nucleolus [GO:0005730]; nucleoplasm [GO:0005654]; small-subunit processome [GO:0032040]	RNA binding [GO:0003723]; snoRNA binding [GO:0030515]; U3 snoRNA binding [GO:0034511]	NA	10
721	O43823;Q8NE02;Q9UG73;M0QYL4;B7Z8L8	Sa1-IAA	-0.162847	0.504607	-0.32272	6	0.757857	0.941025	NA	0.68254	0	O43823	A-kinase anchor protein 8	AKAP8;DKFZp586B1222	cell cycle G2/M phase transition [GO:0044839]; cellular response to lipopolysaccharide [GO:0071222]; cellular response to prostaglandin E stimulus [GO:0071380]; innate immune response [GO:0045087]; mitotic cell cycle [GO:0000278]; mitotic chromosome condensation [GO:0007076]; negative regulation of tumor necrosis factor production [GO:0032720]; positive regulation of histone deacetylation [GO:003…	condensed chromosome [GO:0000793]; female pronucleus [GO:0001939]; Golgi apparatus [GO:0005794]; membrane [GO:0016020]; mitochondrion [GO:0005739]; nuclear matrix [GO:0016363]; nucleolus [GO:0005730]; nucleoplasm [GO:0005654]; nucleus [GO:0005634]	double-stranded DNA binding [GO:0003690]; histone deacetylase binding [GO:0042826]; NF-kappaB binding [GO:0051059]; protein kinase A regulatory subunit binding [GO:0034237]; RNA binding [GO:0003723]; zinc ion binding [GO:0008270]	NA	31
722	O43896;H7C0K6;X5D2L7;A0A024R4H4;X5D7J0;A0A3F2YNW9;A0A3B3IUA1;A0A3B3IU40;A0A3B3IT28;A0A3B3ITE5;A0A3B3ITF7;A0A3B3ITW6;Q4R9M7;Q4R9M8;A0A087WWA3;Q4R9M9;Q12756;O60333	Sa1-IAA	-0.169217	0.0569044	-2.97371	1	0.20652	0.731578	NA	0.714286	0	O43896	Kinesin-like protein KIF1C	KIF1C	anterograde neuronal dense core vesicle transport [GO:1990048]; cytoskeleton-dependent intracellular transport [GO:0030705]; microtubule-based movement [GO:0007018]; retrograde neuronal dense core vesicle transport [GO:1990049]; retrograde vesicle-mediated transport, Golgi to endoplasmic reticulum [GO:0006890]; vesicle-mediated transport [GO:0016192]	axon [GO:0030424]; axon cytoplasm [GO:1904115]; dendrite [GO:0030425]; endoplasmic reticulum [GO:0005783]; Golgi apparatus [GO:0005794]; kinesin complex [GO:0005871]; microtubule [GO:0005874]; neuron projection [GO:0043005]	ATPase activity [GO:0016887]; ATP binding [GO:0005524]; ATP-dependent microtubule motor activity, plus-end-directed [GO:0008574]; microtubule binding [GO:0008017]; microtubule motor activity [GO:0003777]; motor activity [GO:0003774]; RNA binding [GO:0003723]	NA	19
723	O60264;B7ZAX9;B4DZC0;Q4W5G3;Q4W5H1	Sa1-IAA	-0.234021	0.25897	-0.903661	7	0.396208	0.817982	NA	0.496753	0	O60264	SWI/SNF-related matrix-associated actin-dependent regulator of chromatin subfamily A member 5	SMARCA5	ATP-dependent chromatin remodeling [GO:0043044]; cellular response to leukemia inhibitory factor [GO:1990830]; CENP-A containing nucleosome assembly [GO:0034080]; chromatin remodeling [GO:0006338]; DNA-templated transcription, initiation [GO:0006352]; nucleosome assembly [GO:0006334]; nucleosome positioning [GO:0016584]; positive regulation of gene expression, epigenetic [GO:0045815]; positive re…	chromatin silencing complex [GO:0005677]; condensed chromosome [GO:0000793]; fibrillar center [GO:0001650]; nucleoplasm [GO:0005654]; nucleus [GO:0005634]; NURF complex [GO:0016589]; RSF complex [GO:0031213]	ATPase activity [GO:0016887]; ATP binding [GO:0005524]; DNA binding [GO:0003677]; DNA-dependent ATPase activity [GO:0008094]; helicase activity [GO:0004386]; nucleosome binding [GO:0031491]	NA	63
724	O60287;REV__Q6IFA1	Sa1-IAA	-0.654689	0.515467	-1.27009	7	0.244639	0.761092	NA	0.642857	0	O60287	Nucleolar pre-ribosomal-associated protein 1	URB1	maturation of 5.8S rRNA from tricistronic rRNA transcript (SSU-rRNA, 5.8S rRNA, LSU-rRNA) [GO:0000466]; maturation of LSU-rRNA from tricistronic rRNA transcript (SSU-rRNA, 5.8S rRNA, LSU-rRNA) [GO:0000463]	fibrillar center [GO:0001650]; nucleolus [GO:0005730]	RNA binding [GO:0003723]	NA	13
725	O60293	Sa1-IAA	-0.185716	0.429272	-0.432629	1	0.740059	0.941025	NA	0.821429	0	O60293	Zinc finger C3H1 domain-containing protein	ZFC3H1	RNA processing [GO:0006396]	exosome (RNase complex) [GO:0000178]; extracellular space [GO:0005615]; nucleus [GO:0005634]	metal ion binding [GO:0046872]	NA	15
726	O60318;B7Z8Z8;B3KXE8;B3KT88;B3KWZ4	Sa1-IAA	#NAME?	NA	NA	NA	NA	0	oneConditionMissing	0.714286	0	O60318	Germinal-center associated nuclear protein	MCM3AP	mRNA export from nucleus [GO:0006406]; nucleosome organization [GO:0034728]; poly(A)+ mRNA export from nucleus [GO:0016973]; somatic hypermutation of immunoglobulin genes [GO:0016446]	chromosome [GO:0005694]; cytoplasm [GO:0005737]; cytosol [GO:0005829]; nuclear membrane [GO:0031965]; nuclear pore nuclear basket [GO:0044615]; nucleoplasm [GO:0005654]; nucleus [GO:0005634]; transcription export complex 2 [GO:0070390]	chromatin binding [GO:0003682]; H3 histone acetyltransferase activity [GO:0010484]; histone acetyltransferase activity [GO:0004402]; histone binding [GO:0042393]; nucleic acid binding [GO:0003676]	NA	8
727	O60506;B2R8Z8;Q05CK9;Q59GL1;B7Z645;F6UXX1;B7Z213	Sa1-IAA	-1.01679	0.447688	-2.2712	5	0.0723298	0.618718	NA	0.8	0	O60506	Heterogeneous nuclear ribonucleoprotein Q	SYNCRIP	cellular response to interferon-gamma [GO:0071346]; CRD-mediated mRNA stabilization [GO:0070934]; mRNA splicing, via spliceosome [GO:0000398]; negative regulation of translation [GO:0017148]; osteoblast differentiation [GO:0001649]; RNA processing [GO:0006396]; RNA splicing [GO:0008380]; viral process [GO:0016032]	catalytic step 2 spliceosome [GO:0071013]; CRD-mediated mRNA stability complex [GO:0070937]; endoplasmic reticulum [GO:0005783]; GAIT complex [GO:0097452]; histone pre-mRNA 3'end processing complex [GO:0071204]; membrane [GO:0016020]; nucleoplasm [GO:0005654]; nucleus [GO:0005634]; ribonucleoprotein complex [GO:1990904]	mRNA 5'-UTR binding [GO:0048027]; mRNA binding [GO:0003729]; poly(A) binding [GO:0008143]; RNA binding [GO:0003723]	NA	197
728	O60583;B4DH21;F8WDY7;F2Z2C9	Sa1-IAA	0.629193	0.455569	1.38111	2	0.301315	0.783886	NA	0.642857	0	O60583	Cyclin-T2	CCNT2	cell cycle [GO:0007049]; cell division [GO:0051301]; early viral transcription [GO:0019085]; late viral transcription [GO:0019086]; positive regulation of DNA-templated transcription, elongation [GO:0032786]; positive regulation of transcription by RNA polymerase II [GO:0045944]; regulation of cyclin-dependent protein serine/threonine kinase activity [GO:0000079]; regulation of muscle cell differ…	cyclin/CDK positive transcription elongation factor complex [GO:0008024]; cytosol [GO:0005829]; host cell nucleus [GO:0042025]; nucleoplasm [GO:0005654]; nucleus [GO:0005634]; perinuclear region of cytoplasm [GO:0048471]; plasma membrane [GO:0005886]	7SK snRNA binding [GO:0097322]; chromatin binding [GO:0003682]; cyclin-dependent protein serine/threonine kinase activator activity [GO:0061575]; cyclin-dependent protein serine/threonine kinase regulator activity [GO:0016538]; protein kinase binding [GO:0019901]; RNA polymerase binding [GO:0070063]; transcription coactivator binding [GO:0001223]	NA	8
729	O60832;C9IYT0;U5UA77;H7C0M1;U5U7S7;H7C2Q9;H7BZF2;H7C2Q2;U5U768	Sa1-IAA	-0.318291	0.239359	-1.32976	7	0.22529	0.744405	NA	0.491071	0	O60832	H/ACA ribonucleoprotein complex subunit 4	DKC1	box H/ACA snoRNA 3'-end processing [GO:0000495]; enzyme-directed rRNA pseudouridine synthesis [GO:0000455]; mRNA pseudouridine synthesis [GO:1990481]; positive regulation of establishment of protein localization to telomere [GO:1904851]; positive regulation of protein localization to Cajal body [GO:1904871]; positive regulation of telomerase activity [GO:0051973]; positive regulation of telomeras…	box H/ACA scaRNP complex [GO:0072589]; box H/ACA snoRNP complex [GO:0031429]; box H/ACA telomerase RNP complex [GO:0090661]; cytoplasm [GO:0005737]; fibrillar center [GO:0001650]; nucleolus [GO:0005730]; nucleoplasm [GO:0005654]; nucleus [GO:0005634]; telomerase holoenzyme complex [GO:0005697]	box H/ACA snoRNA binding [GO:0034513]; pseudouridine synthase activity [GO:0009982]; RNA binding [GO:0003723]; telomerase activity [GO:0003720]; telomerase RNA binding [GO:0070034]	NA	74
730	O75146;B3KQW8;A0A024RBR4;B4DPL0;B4DI31;B3KN98	Sa1-IAA	0.738774	0.478942	1.54251	6	0.17389	0.716992	NA	0.428571	0	O75146	Huntingtin-interacting protein 1-related protein	HIP1R	actin filament organization [GO:0007015]; activation of cysteine-type endopeptidase activity involved in apoptotic process [GO:0006919]; apoptotic process [GO:0006915]; clathrin coat assembly [GO:0048268]; digestive system development [GO:0055123]; membrane organization [GO:0061024]; negative regulation of actin filament polymerization [GO:0030837]; negative regulation of apoptotic process [GO:00…	apical plasma membrane [GO:0016324]; cell cortex [GO:0005938]; clathrin-coated pit [GO:0005905]; clathrin-coated vesicle [GO:0030136]; clathrin-coated vesicle membrane [GO:0030665]; cytoskeleton [GO:0005856]; cytosol [GO:0005829]; dendrite cytoplasm [GO:0032839]; dendritic spine [GO:0043197]; intracellular membrane-bounded organelle [GO:0043231]; mitochondrion [GO:0005739]; neuronal cell body [GO…	actin filament binding [GO:0051015]; clathrin adaptor activity [GO:0035615]; clathrin binding [GO:0030276]; clathrin light chain binding [GO:0032051]; identical protein binding [GO:0042802]; phosphatidylinositol-3,4,5-trisphosphate binding [GO:0005547]; phosphatidylinositol-3,4-bisphosphate binding [GO:0043325]; phosphatidylinositol-3,5-bisphosphate binding [GO:0080025]; phosphatidylinositol-4,5-…	NA	3
731	O75151;A0A087WW48;Q6P2C5;B4DH04;E7ET14;Q8N359	Sa1-IAA	Inf	NA	NA	NA	NA	0	oneConditionMissing	0.857143	0	O75151	Lysine-specific demethylase PHF2	PHF2	liver development [GO:0001889]; negative regulation of ribosomal DNA heterochromatin assembly [GO:0061188]; protein demethylation [GO:0006482]	condensed chromosome kinetochore [GO:0000777]; kinetochore [GO:0000776]; nucleolus [GO:0005730]; nucleoplasm [GO:0005654]; nucleus [GO:0005634]	dioxygenase activity [GO:0051213]; histone demethylase activity (H3-K9 specific) [GO:0032454]; iron ion binding [GO:0005506]; methylated histone binding [GO:0035064]; transcription coactivator activity [GO:0003713]; zinc ion binding [GO:0008270]	NA	25
732	O75367;B4DJC3;D6RCF2;Q59FH0	Sa1-IAA	-0.863435	0.365341	-2.36337	7	0.0500925	0.615638	NA	0.514286	0	O75367	Core histone macro-H2A.1;Histone H2A	H2AFY	chromatin organization [GO:0006325]; chromatin silencing [GO:0006342]; dosage compensation [GO:0007549]; establishment of protein localization to chromatin [GO:0071169]; negative regulation of cell cycle G2/M phase transition [GO:1902750]; negative regulation of gene expression, epigenetic [GO:0045814]; negative regulation of histone H3-K27 methylation [GO:0061086]; negative regulation of histone…	Barr body [GO:0001740]; condensed chromosome [GO:0000793]; extracellular exosome [GO:0070062]; nuclear chromatin [GO:0000790]; nuclear chromosome [GO:0000228]; nuclear chromosome, telomeric region [GO:0000784]; nucleolus [GO:0005730]; nucleoplasm [GO:0005654]; nucleosome [GO:0000786]; nucleus [GO:0005634]; pericentric heterochromatin [GO:0005721]; sex chromatin [GO:0001739]	chromatin DNA binding [GO:0031490]; DNA binding [GO:0003677]; double-stranded methylated DNA binding [GO:0010385]; enzyme binding [GO:0019899]; nucleosomal DNA binding [GO:0031492]; promoter-specific chromatin binding [GO:1990841]; protein heterodimerization activity [GO:0046982]; protein kinase binding [GO:0019901]; protein serine/threonine kinase inhibitor activity [GO:0030291]; rDNA binding [G…	NA	68
733	O75475;Q05CM9;Q8N4N4	Sa1-IAA	-0.104084	0.766375	-0.135813	3	0.90057	0.984803	NA	0.571429	0	O75475	PC4 and SFRS1-interacting protein	PSIP1	establishment of integrated proviral latency [GO:0075713]; mRNA 5'-splice site recognition [GO:0000395]; nuclear transport [GO:0051169]; positive regulation of transcription by RNA polymerase II [GO:0045944]; response to heat [GO:0009408]; response to oxidative stress [GO:0006979]	cytosol [GO:0005829]; nuclear chromatin [GO:0000790]; nuclear heterochromatin [GO:0005720]; nuclear periphery [GO:0034399]; nucleoplasm [GO:0005654]; nucleus [GO:0005634]; transcriptionally active chromatin [GO:0035327]	activating transcription factor binding [GO:0033613]; chromatin binding [GO:0003682]; RNA binding [GO:0003723]; supercoiled DNA binding [GO:0097100]; transcription coactivator activity [GO:0003713]	NA	51
734	O75477;B2RDK6;B4DPN7;B0QZ43	Sa1-IAA	-0.844497	0.720003	-1.17291	4	0.305913	0.783886	NA	0.428571	0	O75477	Erlin-1	ERLIN1	cholesterol metabolic process [GO:0008203]; negative regulation of cholesterol biosynthetic process [GO:0045541]; negative regulation of fatty acid biosynthetic process [GO:0045717]; SREBP signaling pathway [GO:0032933]; transmembrane transport [GO:0055085]; ubiquitin-dependent ERAD pathway [GO:0030433]	endoplasmic reticulum [GO:0005783]; endoplasmic reticulum membrane [GO:0005789]; integral component of membrane [GO:0016021]; protein-containing complex [GO:0032991]	cholesterol binding [GO:0015485]; ubiquitin protein ligase binding [GO:0031625]	NA	29
735	O75530;E9PJK2;H0YEL4;B4DVW7;E9PMU3;B4DFK0	Sa1-IAA	0.994188	0.473496	2.09967	1	0.282965	0.783886	NA	0.785714	0	O75530	Polycomb protein EED	EED	cellular response to leukemia inhibitory factor [GO:1990830]; chromatin silencing [GO:0006342]; histone H3-K27 methylation [GO:0070734]; negative regulation of G0 to G1 transition [GO:0070317]; negative regulation of gene expression, epigenetic [GO:0045814]; negative regulation of transcription, DNA-templated [GO:0045892]; negative regulation of transcription by RNA polymerase II [GO:0000122]; po…	cytosol [GO:0005829]; ESC/E(Z) complex [GO:0035098]; nucleoplasm [GO:0005654]; nucleus [GO:0005634]; pronucleus [GO:0045120]; sex chromatin [GO:0001739]	chromatin binding [GO:0003682]; histone methyltransferase activity [GO:0042054]; identical protein binding [GO:0042802]; RNA polymerase II cis-regulatory region sequence-specific DNA binding [GO:0000978]; RNA polymerase II transcription corepressor binding [GO:0001226]	NA	4
736	O75533;Q7Z497;A0JLT9;Q32Q20;A0PJH5;B4DGZ4;A0A494C1M2;H7C341;A8K355;Q9NTB4;F8WC19	Sa1-IAA	-0.397641	0.203947	-1.94972	7	0.0922051	0.618718	NA	0.483965	0	O75533	Splicing factor 3B subunit 1	SF3B1	mRNA splicing, via spliceosome [GO:0000398]; positive regulation of gene expression, epigenetic [GO:0045815]; RNA splicing [GO:0008380]; RNA splicing, via transesterification reactions [GO:0000375]; spliceosomal complex assembly [GO:0000245]	catalytic step 2 spliceosome [GO:0071013]; nuclear speck [GO:0016607]; nucleoplasm [GO:0005654]; nucleus [GO:0005634]; spliceosomal complex [GO:0005681]; U11/U12 snRNP [GO:0034693]; U12-type spliceosomal complex [GO:0005689]; U2 snRNP [GO:0005686]; U2-type precatalytic spliceosome [GO:0071005]; U2-type prespliceosome [GO:0071004]	mRNA binding [GO:0003729]; RNA binding [GO:0003723]; splicing factor binding [GO:1990935]	NA	171
737	O75643;A4FU77;A0A494C1A5;Q9H8B9;B4E150;Q9UNV9;A2RRQ7;Q7L5W4;B4E0P5;Q9P172;Q5ZF01	Sa1-IAA	-0.449474	0.255495	-1.75923	7	0.12194	0.649655	NA	0.494286	0	O75643	U5 small nuclear ribonucleoprotein 200 kDa helicase	SNRNP200	cis assembly of pre-catalytic spliceosome [GO:0000354]; mRNA splicing, via spliceosome [GO:0000398]; osteoblast differentiation [GO:0001649]; spliceosome conformational change to release U4 (or U4atac) and U1 (or U11) [GO:0000388]	catalytic step 2 spliceosome [GO:0071013]; membrane [GO:0016020]; nucleoplasm [GO:0005654]; nucleus [GO:0005634]; spliceosomal complex [GO:0005681]; U2-type catalytic step 1 spliceosome [GO:0071006]; U2-type precatalytic spliceosome [GO:0071005]; U4/U6 x U5 tri-snRNP complex [GO:0046540]; U5 snRNP [GO:0005682]	ATP binding [GO:0005524]; helicase activity [GO:0004386]; identical protein binding [GO:0042802]; RNA binding [GO:0003723]; RNA helicase activity [GO:0003724]	NA	146
738	O75691;B4DN27	Sa1-IAA	-0.768343	0.335422	-2.29067	7	0.0557521	0.618718	NA	0.571429	0	O75691	Small subunit processome component 20 homolog	UTP20	endonucleolytic cleavage in 5'-ETS of tricistronic rRNA transcript (SSU-rRNA, 5.8S rRNA, LSU-rRNA) [GO:0000480]; endonucleolytic cleavage in ITS1 to separate SSU-rRNA from 5.8S rRNA and LSU-rRNA from tricistronic rRNA transcript (SSU-rRNA, 5.8S rRNA, LSU-rRNA) [GO:0000447]; endonucleolytic cleavage to generate mature 5'-end of SSU-rRNA from (SSU-rRNA, 5.8S rRNA, LSU-rRNA) [GO:0000472]; negative r…	90S preribosome [GO:0030686]; cytoplasm [GO:0005737]; nucleolus [GO:0005730]; nucleoplasm [GO:0005654]; plasma membrane [GO:0005886]; preribosome, small subunit precursor [GO:0030688]; small-subunit processome [GO:0032040]	RNA binding [GO:0003723]	NA	12
739	O76021;Q32Q62;J3QSV6;A0PJ61;A0PJ87;I3L3U9;I3L3C4;I3L234;J3KPU7;I3L2F2;I3L4T8;I3L1Y4	Sa1-IAA	-1.10937	0.671038	-1.65321	7	0.142266	0.6651	NA	0.379699	0	O76021	Ribosomal L1 domain-containing protein 1	RSL1D1	maturation of LSU-rRNA [GO:0000470]; osteoblast differentiation [GO:0001649]; regulation of apoptotic process [GO:0042981]; regulation of cellular senescence [GO:2000772]; regulation of protein localization [GO:0032880]	90S preribosome [GO:0030686]; membrane [GO:0016020]; nucleolus [GO:0005730]	cadherin binding [GO:0045296]; mRNA 3'-UTR binding [GO:0003730]; mRNA 5'-UTR binding [GO:0048027]; RNA binding [GO:0003723]	NA	98
740	O94874	Sa1-IAA	Inf	NA	NA	NA	NA	0	oneConditionMissing	0.714286	0	O94874	E3 UFM1-protein ligase 1	UFL1	cellular response to DNA damage stimulus [GO:0006974]; DNA repair [GO:0006281]; erythrocyte differentiation [GO:0030218]; hematopoietic stem cell differentiation [GO:0060218]; histone modification [GO:0016570]; negative regulation of apoptotic process [GO:0043066]; negative regulation of IRE1-mediated unfolded protein response [GO:1903895]; negative regulation of NF-kappaB transcription factor ac…	cytoplasm [GO:0005737]; cytosol [GO:0005829]; endoplasmic reticulum [GO:0005783]; endoplasmic reticulum membrane [GO:0005789]; membrane [GO:0016020]; neuron projection [GO:0043005]; nucleus [GO:0005634]; protein-containing complex [GO:0032991]; site of double-strand break [GO:0035861]	protein kinase binding [GO:0019901]; UFM1 ligase activity [GO:0061666]; UFM1 transferase activity [GO:0071568]	NA	11
741	O94906	Sa1-IAA	-0.08981	0.262332	-0.342352	7	0.742135	0.941025	NA	0.494505	0	O94906	Pre-mRNA-processing factor 6	PRPF6	mRNA splicing, via spliceosome [GO:0000398]; positive regulation of transcription by RNA polymerase II [GO:0045944]; RNA localization [GO:0006403]; RNA splicing [GO:0008380]; RNA splicing, via transesterification reactions [GO:0000375]; spliceosomal complex assembly [GO:0000245]; spliceosomal tri-snRNP complex assembly [GO:0000244]	catalytic step 2 spliceosome [GO:0071013]; membrane [GO:0016020]; nuclear speck [GO:0016607]; nucleoplasm [GO:0005654]; nucleus [GO:0005634]; spliceosomal complex [GO:0005681]; U2-type precatalytic spliceosome [GO:0071005]; U4/U6 x U5 tri-snRNP complex [GO:0046540]; U5 snRNP [GO:0005682]	androgen receptor binding [GO:0050681]; ribonucleoprotein complex binding [GO:0043021]; RNA binding [GO:0003723]; transcription coactivator activity [GO:0003713]	NA	92
742	O94913;E9PKN0;B7Z7X4;E9PQ01;E9PQF9;E9PNY7	Sa1-IAA	-1.3111	NA	NA	0	NA	NA	NA	0.714286	0	O94913	Pre-mRNA cleavage complex 2 protein Pcf11	PCF11	mRNA 3'-end processing [GO:0031124]; mRNA cleavage [GO:0006379]; mRNA polyadenylation [GO:0006378]; mRNA splicing, via spliceosome [GO:0000398]; termination of RNA polymerase II transcription [GO:0006369]	cytoplasm [GO:0005737]; mitochondrion [GO:0005739]; mRNA cleavage factor complex [GO:0005849]; nucleoplasm [GO:0005654]	mRNA binding [GO:0003729]; RNA polymerase II complex binding [GO:0000993]	NA	23
743	O95235;D6R9E4;D6RBN1	Sa1-IAA	-0.0389127	0.213366	-0.182375	3	0.866916	0.972373	NA	0.607143	0	O95235	Kinesin-like protein KIF20A	KIF20A	microtubule-based movement [GO:0007018]; microtubule bundle formation [GO:0001578]; midbody abscission [GO:0061952]; mitotic cytokinesis [GO:0000281]; protein transport [GO:0015031]; regulation of cytokinesis [GO:0032465]	cleavage furrow [GO:0032154]; Golgi apparatus [GO:0005794]; intercellular bridge [GO:0045171]; kinesin complex [GO:0005871]; microtubule [GO:0005874]; midbody [GO:0030496]; nucleoplasm [GO:0005654]; nucleus [GO:0005634]; spindle [GO:0005819]	ATPase activity [GO:0016887]; ATP binding [GO:0005524]; microtubule binding [GO:0008017]; microtubule motor activity [GO:0003777]; protein kinase binding [GO:0019901]	NA	12
744	O95239;Q59HG1;B3KNC0;Q6PKB2;B4DYE2;Q2VIQ3	Sa1-IAA	0.419367	0.437473	0.958611	7	0.369685	0.796306	NA	0.61039	0	O95239	Chromosome-associated kinesin KIF4A;Kinesin-like protein	KIF4A	anterograde axonal transport [GO:0008089]; antigen processing and presentation of exogenous peptide antigen via MHC class II [GO:0019886]; microtubule-based movement [GO:0007018]; mitotic cytokinesis [GO:0000281]; mitotic spindle midzone assembly [GO:0051256]; mitotic spindle organization [GO:0007052]; organelle organization [GO:0006996]; retrograde vesicle-mediated transport, Golgi to endoplasmi…	axon cytoplasm [GO:1904115]; chromosome [GO:0005694]; cytoplasm [GO:0005737]; cytosol [GO:0005829]; membrane [GO:0016020]; midbody [GO:0030496]; nuclear matrix [GO:0016363]; nucleoplasm [GO:0005654]; spindle microtubule [GO:0005876]	ATP binding [GO:0005524]; DNA binding [GO:0003677]; iron-sulfur cluster binding [GO:0051536]; metal ion binding [GO:0046872]; microtubule binding [GO:0008017]; microtubule motor activity [GO:0003777]	NA	35
745	O95251;B4DG18;E7EUP3;B7Z4D9;B3KVJ2;B4DGH8;B4DJ40	Sa1-IAA	0.324862	0.321837	1.0094	7	0.346395	0.790424	NA	0.314286	0	O95251	Histone acetyltransferase KAT7	KAT7	DNA repair [GO:0006281]; DNA replication [GO:0006260]; histone H3 acetylation [GO:0043966]; histone H3-K14 acetylation [GO:0044154]; histone H4 acetylation [GO:0043967]; histone H4-K12 acetylation [GO:0043983]; histone H4-K5 acetylation [GO:0043981]; histone H4-K8 acetylation [GO:0043982]; internal peptidyl-lysine acetylation [GO:0018393]; natural killer cell differentiation [GO:0001779]; negativ…	chromosome [GO:0005694]; chromosome, centromeric region [GO:0000775]; cytosol [GO:0005829]; histone acetyltransferase complex [GO:0000123]; histone H3-K14 acetyltransferase complex [GO:0036409]; nuclear chromatin [GO:0000790]; nucleoplasm [GO:0005654]; nucleus [GO:0005634]; Piccolo NuA4 histone acetyltransferase complex [GO:0032777]; site of DNA damage [GO:0090734]	DNA replication origin binding [GO:0003688]; H4 histone acetyltransferase activity [GO:0010485]; histone acetyltransferase activity [GO:0004402]; histone binding [GO:0042393]; zinc ion binding [GO:0008270]	NA	17
746	O95373;E9PLJ0;B3KQG6	Sa1-IAA	0.506449	0.454104	1.11527	2	0.380771	0.809931	NA	0.428571	0	O95373	Importin-7	IPO7	innate immune response [GO:0045087]; negative regulation of cyclin-dependent protein serine/threonine kinase activity [GO:0045736]; protein import into nucleus [GO:0006606]; signal transduction [GO:0007165]; viral process [GO:0016032]	cytosol [GO:0005829]; membrane [GO:0016020]; nuclear envelope [GO:0005635]; nuclear pore [GO:0005643]; nucleoplasm [GO:0005654]	GTPase regulator activity [GO:0030695]; histone binding [GO:0042393]; Ran GTPase binding [GO:0008536]; SMAD binding [GO:0046332]; transporter activity [GO:0005215]	NA	64
747	O95470	Sa1-IAA	0.301816	0.562509	0.536553	3	0.628814	0.895424	NA	0.666667	0	O95470	Sphingosine-1-phosphate lyase 1	SGPL1	ameboidal-type cell migration [GO:0001667]; androgen metabolic process [GO:0008209]; apoptotic signaling pathway [GO:0097190]; ceramide metabolic process [GO:0006672]; estrogen metabolic process [GO:0008210]; face morphogenesis [GO:0060325]; fatty acid metabolic process [GO:0006631]; fibroblast migration [GO:0010761]; hemopoiesis [GO:0030097]; kidney development [GO:0001822]; Leydig cell differen…	endoplasmic reticulum [GO:0005783]; endoplasmic reticulum membrane [GO:0005789]; integral component of endoplasmic reticulum membrane [GO:0030176]	carboxy-lyase activity [GO:0016831]; pyridoxal phosphate binding [GO:0030170]; sphinganine-1-phosphate aldolase activity [GO:0008117]	NA	10
748	O95487;B4E205;B4E2E1;B4DTM6;O95486	Sa1-IAA	#NAME?	NA	NA	NA	NA	0	oneConditionMissing	0.857143	0	O95487	Protein transport protein Sec24B;Protein transport protein Sec24A	SEC24B;SEC24A	antigen processing and presentation of exogenous peptide antigen via MHC class II [GO:0019886]; antigen processing and presentation of peptide antigen via MHC class I [GO:0002474]; aorta morphogenesis [GO:0035909]; auditory receptor cell stereocilium organization [GO:0060088]; cochlear nucleus development [GO:0021747]; COPII-coated vesicle cargo loading [GO:0090110]; COPII vesicle coating [GO:004…	COPII vesicle coat [GO:0030127]; cytosol [GO:0005829]; endoplasmic reticulum exit site [GO:0070971]; endoplasmic reticulum membrane [GO:0005789]; ER to Golgi transport vesicle membrane [GO:0012507]; Golgi membrane [GO:0000139]	SNARE binding [GO:0000149]; zinc ion binding [GO:0008270]	NA	21
749	O95831;A0A140VK04;E9PMA0;Q5RZ99;Q5RZA0	Sa1-IAA	Inf	NA	NA	NA	NA	0	oneConditionMissing	0.714286	0	O95831	Apoptosis-inducing factor 1, mitochondrial	AIFM1	activation of cysteine-type endopeptidase activity involved in apoptotic process [GO:0006919]; apoptotic process [GO:0006915]; cellular response to aldosterone [GO:1904045]; cellular response to estradiol stimulus [GO:0071392]; cellular response to hydrogen peroxide [GO:0070301]; cellular response to nitric oxide [GO:0071732]; cellular response to oxygen-glucose deprivation [GO:0090650]; chromoso…	cytosol [GO:0005829]; mitochondrial inner membrane [GO:0005743]; mitochondrial intermembrane space [GO:0005758]; mitochondrion [GO:0005739]; nucleus [GO:0005634]; perinuclear region of cytoplasm [GO:0048471]	DNA binding [GO:0003677]; FAD binding [GO:0071949]; NAD(P)H oxidase (H(2)O(2)-forming activity [GO:0016174]; oxidoreductase activity, acting on NAD(P)H [GO:0016651]; protein dimerization activity [GO:0046983]	NA	101
750	O96028;D6R9V2;Q05CW4;D6RIS1;H0Y9L4;D6RFE7;H0Y9U6	Sa1-IAA	-0.770909	0.373563	-2.06367	7	0.0779422	0.618718	NA	0.632653	0	O96028	Histone-lysine N-methyltransferase NSD2	WHSC1	atrial septum primum morphogenesis [GO:0003289]; atrial septum secundum morphogenesis [GO:0003290]; bone development [GO:0060348]; double-strand break repair via nonhomologous end joining [GO:0006303]; membranous septum morphogenesis [GO:0003149]; negative regulation of transcription by RNA polymerase II [GO:0000122]; positive regulation of isotype switching to IgA isotypes [GO:0048298]; regulati…	chromatin [GO:0000785]; cytoplasm [GO:0005737]; nucleoplasm [GO:0005654]; nucleus [GO:0005634]	chromatin binding [GO:0003682]; DNA-binding transcription factor activity, RNA polymerase II-specific [GO:0000981]; histone methyltransferase activity (H3-K36 specific) [GO:0046975]; histone methyltransferase activity (H4-K20 specific) [GO:0042799]; metal ion binding [GO:0046872]; sequence-specific DNA binding [GO:0043565]	NA	29
751	P01040;C9J0E4	Sa1-IAA	Inf	NA	NA	NA	NA	0	oneConditionMissing	0.714286	0	P01040	Cystatin-A;Cystatin-A, N-terminally processed	CSTA	cell-cell adhesion [GO:0098609]; cornification [GO:0070268]; keratinocyte differentiation [GO:0030216]; negative regulation of peptidase activity [GO:0010466]; negative regulation of proteolysis [GO:0045861]; peptide cross-linking [GO:0018149]	cornified envelope [GO:0001533]; cytoplasm [GO:0005737]; cytosol [GO:0005829]; extracellular space [GO:0005615]; nucleoplasm [GO:0005654]	cysteine-type endopeptidase inhibitor activity [GO:0004869]; protease binding [GO:0002020]	NA	45
752	P04259	Sa1-IAA	0.26733	0.71276	0.375063	1	0.771564	0.945699	NA	0.571429	0	P04259	Keratin, type II cytoskeletal 6B	KRT6B	cornification [GO:0070268]; ectoderm development [GO:0007398]; keratinization [GO:0031424]	cytosol [GO:0005829]; extracellular exosome [GO:0070062]; keratin filament [GO:0045095]	structural constituent of cytoskeleton [GO:0005200]	P04259	319
753	P05023;B7Z3V1;M0R116;A0A2R8YEY8;Q53ES0;B7Z9V4;A0A0A0MT26;P13637;B7Z1Q9;B3KRI1;B7Z3F8;B1AKY9;B2RAQ4;A0A0S2Z3W6;P50993;B7Z1N5;B3KX35;B3KV59;H0Y7C1;B4DIQ8;B3KW93;B3KNQ8;B3KSY7;Q5TC01;B4DHD7;Q658V6;Q53FM3;A0A384MR29;P20648;Q5TC02;M0QXF2;A0A0S2Z3D3;B4E0R9;P54707;A0A2H4Y9T5;Q58I23;Q58I22;Q58I21;Q5TC05;B4DRW5	Sa1-IAA	0.254728	0.560024	0.454852	6	0.665209	0.912563	NA	0.612245	0	P05023	Sodium/potassium-transporting ATPase subunit alpha-1;Sodium/potassium-transporting ATPase subunit alpha-3	ATP1A1;ATP1A3	cardiac muscle cell action potential involved in contraction [GO:0086002]; cell communication by electrical coupling involved in cardiac conduction [GO:0086064]; cellular potassium ion homeostasis [GO:0030007]; cellular response to mechanical stimulus [GO:0071260]; cellular response to steroid hormone stimulus [GO:0071383]; cellular sodium ion homeostasis [GO:0006883]; ion transmembrane transport…	apical plasma membrane [GO:0016324]; basolateral plasma membrane [GO:0016323]; caveola [GO:0005901]; endoplasmic reticulum [GO:0005783]; endosome [GO:0005768]; extracellular exosome [GO:0070062]; extracellular vesicle [GO:1903561]; Golgi apparatus [GO:0005794]; integral component of membrane [GO:0016021]; intercalated disc [GO:0014704]; lateral plasma membrane [GO:0016328]; melanosome [GO:0042470…	ADP binding [GO:0043531]; ankyrin binding [GO:0030506]; ATP binding [GO:0005524]; chaperone binding [GO:0051087]; phosphatase activity [GO:0016791]; phosphatidylinositol 3-kinase binding [GO:0043548]; potassium ion binding [GO:0030955]; protein domain specific binding [GO:0019904]; protein heterodimerization activity [GO:0046982]; protein kinase binding [GO:0019901]; sodium:potassium-exchanging A…	NA	45
754	P05089	Sa1-IAA	-0.295065	0.119534	-2.46847	1	0.245037	0.761092	NA	0.714286	0	P05089	Arginase-1	ARG1	adaptive immune response [GO:0002250]; aging [GO:0007568]; arginine catabolic process [GO:0006527]; arginine catabolic process to ornithine [GO:0019547]; cellular response to dexamethasone stimulus [GO:0071549]; cellular response to glucagon stimulus [GO:0071377]; cellular response to hydrogen peroxide [GO:0070301]; cellular response to interleukin-4 [GO:0071353]; cellular response to lipopolysac…	azurophil granule lumen [GO:0035578]; cytoplasm [GO:0005737]; cytosol [GO:0005829]; extracellular region [GO:0005576]; extracellular space [GO:0005615]; mitochondrial outer membrane [GO:0005741]; neuronal cell body [GO:0043025]; neuron projection [GO:0043005]; nucleus [GO:0005634]; specific granule lumen [GO:0035580]	arginase activity [GO:0004053]; identical protein binding [GO:0042802]; manganese ion binding [GO:0030145]	P05089	50
755	P05141;Q6NVC0;Q9H0C2;O75961	Sa1-IAA	-0.774145	0.719861	-1.07541	7	0.317855	0.783886	NA	0.238095	0	P05141	ADP/ATP translocase 2;ADP/ATP translocase 2, N-terminally processed	SLC25A5	adenine nucleotide transport [GO:0051503]; cellular response to leukemia inhibitory factor [GO:1990830]; chromosome segregation [GO:0007059]; negative regulation of mitochondrial outer membrane permeabilization involved in apoptotic signaling pathway [GO:1901029]; positive regulation of cell population proliferation [GO:0008284]; regulation of insulin secretion [GO:0050796]; viral process [GO:001…	integral component of plasma membrane [GO:0005887]; membrane [GO:0016020]; membrane raft [GO:0045121]; mitochondrial inner membrane [GO:0005743]; mitochondrial nucleoid [GO:0042645]; mitochondrion [GO:0005739]; MMXD complex [GO:0071817]; nucleus [GO:0005634]	adenine nucleotide transmembrane transporter activity [GO:0000295]; adenine transmembrane transporter activity [GO:0015207]; ATP transmembrane transporter activity [GO:0005347]; RNA binding [GO:0003723]; ubiquitin protein ligase binding [GO:0031625]	NA	223
756	P07199;Q71VN4	Sa1-IAA	-0.437547	0.468229	-0.934474	4	0.402962	0.817982	NA	0.571429	0	P07199	Major centromere autoantigen B	CENPB	NA	chromosome [GO:0005694]; chromosome, centromeric region [GO:0000775]; condensed nuclear chromosome, centromeric region [GO:0000780]; host cell nucleus [GO:0042025]; nuclear body [GO:0016604]; nuclear pericentric heterochromatin [GO:0031618]; nucleoplasm [GO:0005654]; nucleus [GO:0005634]	centromeric DNA binding [GO:0019237]; chromatin binding [GO:0003682]; DNA binding [GO:0003677]; satellite DNA binding [GO:0003696]; sequence-specific DNA binding [GO:0043565]	NA	9
757	P07305	Sa1-IAA	-2.06388	0.712249	-2.89769	7	0.0230617	0.500978	NA	0.428571	0	P07305	Histone H1.0;Histone H1.0, N-terminally processed	H1F0	apoptotic DNA fragmentation [GO:0006309]; chromatin silencing [GO:0006342]; chromosome condensation [GO:0030261]; negative regulation of chromatin silencing [GO:0031936]; negative regulation of DNA recombination [GO:0045910]; negative regulation of transcription by RNA polymerase II [GO:0000122]; nucleosome assembly [GO:0006334]; nucleosome positioning [GO:0016584]; positive regulation of transcr…	actin cytoskeleton [GO:0015629]; Golgi apparatus [GO:0005794]; host cell nucleus [GO:0042025]; nuclear body [GO:0016604]; nuclear chromatin [GO:0000790]; nuclear euchromatin [GO:0005719]; nucleoplasm [GO:0005654]; nucleosome [GO:0000786]; nucleus [GO:0005634]; transcription repressor complex [GO:0017053]	AT DNA binding [GO:0003680]; chromatin DNA binding [GO:0031490]; double-stranded DNA binding [GO:0003690]; nucleosomal DNA binding [GO:0031492]; RNA binding [GO:0003723]	P07305	32
758	P08047;H3BUU5;Q59EY3	Sa1-IAA	0.254725	0.25402	1.00278	3	0.389855	0.812707	NA	0.357143	0	P08047	Transcription factor Sp1	SP1	cellular response to insulin stimulus [GO:0032869]; positive regulation by host of viral transcription [GO:0043923]; positive regulation of amyloid-beta formation [GO:1902004]; positive regulation of angiogenesis [GO:0045766]; positive regulation of blood vessel endothelial cell migration [GO:0043536]; positive regulation of gene expression [GO:0010628]; positive regulation of hydrogen sulfide bi…	cytoplasm [GO:0005737]; nuclear chromatin [GO:0000790]; nuclear euchromatin [GO:0005719]; nucleoplasm [GO:0005654]; nucleus [GO:0005634]; protein-DNA complex [GO:0032993]; transcription repressor complex [GO:0017053]	bHLH transcription factor binding [GO:0043425]; cis-regulatory region sequence-specific DNA binding [GO:0000987]; DNA binding [GO:0003677]; DNA-binding transcription activator activity, RNA polymerase II-specific [GO:0001228]; DNA-binding transcription factor activity [GO:0003700]; DNA-binding transcription factor activity, RNA polymerase II-specific [GO:0000981]; double-stranded DNA binding [GO:…	NA	15
759	P08727;C9JM50	Sa1-IAA	-1.29078	0.541815	-2.38232	3	0.0974134	0.618718	NA	0.357143	0	P08727	Keratin, type I cytoskeletal 19	KRT19	cell differentiation involved in embryonic placenta development [GO:0060706]; cornification [GO:0070268]; keratinization [GO:0031424]; Notch signaling pathway [GO:0007219]; response to estrogen [GO:0043627]; sarcomere organization [GO:0045214]; viral process [GO:0016032]	apicolateral plasma membrane [GO:0016327]; cell periphery [GO:0071944]; costamere [GO:0043034]; cytosol [GO:0005829]; dystrophin-associated glycoprotein complex [GO:0016010]; extracellular exosome [GO:0070062]; intermediate filament [GO:0005882]; plasma membrane [GO:0005886]; sarcolemma [GO:0042383]; terminal web [GO:1990357]; Z disc [GO:0030018]	protein-containing complex binding [GO:0044877]; structural constituent of cytoskeleton [GO:0005200]; structural constituent of muscle [GO:0008307]	NA	247
760	P0CJ78	Sa1-IAA	#NAME?	NA	NA	NA	NA	0	oneConditionMissing	0.714286	0	P0CJ78	Zinc finger protein 865	ZNF865	NA	nucleus [GO:0005634]	DNA binding [GO:0003677]; metal ion binding [GO:0046872]	NA	0
761	P0DN76;B5BU08;Q01081;Q8WU68;K7EJH3;A0A1B0GW87;K7EJM7;M0QYK5;Q69YM7;M0R2N4;Q7Z780	Sa1-IAA	0.978645	0.57585	1.69948	7	0.13303	0.658061	NA	0.142857	0	P0DN76	Splicing factor U2AF 35 kDa subunit;Splicing factor U2AF 26 kDa subunit	U2AF1;U2AF1L4	mRNA splicing, via spliceosome [GO:0000398]	nuclear speck [GO:0016607]; nucleoplasm [GO:0005654]; spliceosomal complex [GO:0005681]; U2AF complex [GO:0089701]	metal ion binding [GO:0046872]; pre-mRNA 3'-splice site binding [GO:0030628]	NA	127
762	P0DOX8;Q6PIK1;A0A0B4J231;Q6GMW4;Q6NS95;Q6GMW6;Q96E61;Q6P5S3;Q6GMV7;B9A064;A0M8Q9;Q5CZ94;Q6P2J1;Q6DHW4;P0CG04;A2N2X0;Q5NV84;A2MYD6;A0A5C2G3L3;A0A5C2G1X2;A0A5C2H0T3;A0A5C2H058;A0A5C2GVP4;A0A5C2GUE0;A0A5C2GLX2;A0A5C2GJV7;A0A5C2GGV6;A0A5C2GGA1;A0A5C2GAS6;A0A5C2G296;A0A5C2FZ33;A0A5C2FZ00;A0A5C2FXX6;A0A5C2FUL8;A0A5C2H3X1;A0A5C2GW73;A0A5C2GW32;A0A5C2GV49;A0A5C2GTY1;A0A5C2GTW0;A0A5C2GSM8;A0A5C2GSB3;A0A5C…	Sa1-IAA	-0.536545	0.713003	-0.752514	5	0.48564	0.849038	NA	0.285714	0	P0DOX8	Immunoglobulin lambda-like polypeptide 5;Ig lambda-1 chain C regions	IGL@;IGLL5;C1 segment;DKFZp781M0386;IGLC1	adaptive immune response [GO:0002250]	extracellular region [GO:0005576]; immunoglobulin complex [GO:0019814]; plasma membrane [GO:0005886]	NA	P0DOX8;Q6PIK1;A0A0B4J231;Q6GMW4;Q6NS95;Q6GMW6;Q96E61;Q6P5S3;Q6GMV7;B9A064;A0M8Q9;Q5CZ94;Q6P2J1;Q6DHW4;P0CG04;A2N2X0;Q5NV84;A2MYD6;A0A5C2G3L3;A0A5C2G1X2;A0A5C2H0T3;A0A5C2H058;A0A5C2GVP4;A0A5C2GUE0;A0A5C2GLX2;A0A5C2GJV7;A0A5C2GGV6;A0A5C2GGA1;A0A5C2GAS6;A0A5C2G296;A0A5C2FZ33;A0A5C2FZ00;A0A5C2FXX6;A0A5C2FUL8;A0A5C2H3X1;A0A5C2GW73;A0A5C2GW32;A0A5C2GV49;A0A5C2GTY1;A0A5C2GTW0;A0A5C2GSM8;A0A5C2GSB3;A0A5C…	19
763	P11387;B9EG90;Q9BVT2;B7Z9E8;B4DYD2;E5KMK7;E5KMK6;E5KMK5;Q969P6;D3DWJ7;E5RIC7;Q6PK95;Q6NWZ5;E5RJ95;E5RFS0;B4E061;E5RJ33;H0YBR3;Q8TBP3;H0YAR3;H0YC03;E5RGE7;E5RGR4;E5RFE3;E5RGR2	Sa1-IAA	-0.663419	0.61898	-1.07179	7	0.319368	0.783886	NA	0.508929	0	P11387	DNA topoisomerase 1	TOP1	chromatin remodeling [GO:0006338]; chromosome segregation [GO:0007059]; circadian regulation of gene expression [GO:0032922]; circadian rhythm [GO:0007623]; DNA replication [GO:0006260]; DNA topological change [GO:0006265]; embryonic cleavage [GO:0040016]; peptidyl-serine phosphorylation [GO:0018105]; phosphorylation [GO:0016310]; programmed cell death [GO:0012501]; response to drug [GO:0042493];…	fibrillar center [GO:0001650]; nucleolus [GO:0005730]; nucleoplasm [GO:0005654]; nucleus [GO:0005634]; P-body [GO:0000932]; perikaryon [GO:0043204]; protein-DNA complex [GO:0032993]; replication fork protection complex [GO:0031298]	ATP binding [GO:0005524]; chromatin binding [GO:0003682]; DNA binding [GO:0003677]; DNA topoisomerase type I (single strand cut, ATP-independent) activity [GO:0003917]; double-stranded DNA binding [GO:0003690]; protein domain specific binding [GO:0019904]; protein serine/threonine kinase activity [GO:0004674]; RNA binding [GO:0003723]; RNA polymerase II cis-regulatory region sequence-specific DNA…	NA	110
764	P11388;A0A4D6UXC9;J3KTB7;J3QR57	Sa1-IAA	-0.482763	0.2957	-1.63261	7	0.14657	0.6651	NA	0.509158	0	P11388	DNA topoisomerase 2-alpha	TOP2A	apoptotic chromosome condensation [GO:0030263]; cellular response to DNA damage stimulus [GO:0006974]; chromosome segregation [GO:0007059]; DNA ligation [GO:0006266]; DNA topological change [GO:0006265]; embryonic cleavage [GO:0040016]; female meiotic nuclear division [GO:0007143]; hematopoietic progenitor cell differentiation [GO:0002244]; mitotic DNA integrity checkpoint [GO:0044774]; negative …	chromosome, centromeric region [GO:0000775]; condensed chromosome [GO:0000793]; cytoplasm [GO:0005737]; DNA topoisomerase type II (double strand cut, ATP-hydrolyzing) complex [GO:0009330]; nucleolus [GO:0005730]; nucleoplasm [GO:0005654]; nucleus [GO:0005634]; protein-containing complex [GO:0032991]; ribonucleoprotein complex [GO:1990904]; viral integration complex [GO:0019035]	ATP binding [GO:0005524]; chromatin binding [GO:0003682]; DNA binding [GO:0003677]; DNA binding, bending [GO:0008301]; DNA-dependent ATPase activity [GO:0008094]; DNA topoisomerase type II (double strand cut, ATP-hydrolyzing) activity [GO:0003918]; drug binding [GO:0008144]; enzyme binding [GO:0019899]; histone deacetylase binding [GO:0042826]; magnesium ion binding [GO:0000287]; protein C-termin…	NA	69
765	P12755;Q7Z461;Q7Z459	Sa1-IAA	0.258136	0.649737	0.397294	0	NA	NA	NA	0.571429	0	P12755	Ski oncogene	SKI	anterior/posterior axis specification [GO:0009948]; BMP signaling pathway [GO:0030509]; bone morphogenesis [GO:0060349]; camera-type eye development [GO:0043010]; camera-type eye morphogenesis [GO:0048593]; cell motility [GO:0048870]; embryonic limb morphogenesis [GO:0030326]; face morphogenesis [GO:0060325]; lens morphogenesis in camera-type eye [GO:0002089]; myelination in peripheral nervous sy…	centrosome [GO:0005813]; cytoplasm [GO:0005737]; nuclear body [GO:0016604]; nucleoplasm [GO:0005654]; nucleus [GO:0005634]; PML body [GO:0016605]; protein-containing complex [GO:0032991]; transcription regulator complex [GO:0005667]; transcription repressor complex [GO:0017053]	DNA-binding transcription repressor activity, RNA polymerase II-specific [GO:0001227]; histone deacetylase inhibitor activity [GO:0046811]; identical protein binding [GO:0042802]; protein domain specific binding [GO:0019904]; protein kinase binding [GO:0019901]; repressing transcription factor binding [GO:0070491]; SMAD binding [GO:0046332]; transcription corepressor activity [GO:0003714]; ubiqui…	NA	6
766	P13010;Q53T09;Q53TC2	Sa1-IAA	0.0883399	0.250127	0.353181	7	0.73435	0.941025	NA	0.5	0	P13010	X-ray repair cross-complementing protein 5	XRCC5	activation of innate immune response [GO:0002218]; brain development [GO:0007420]; cell population proliferation [GO:0008283]; cellular hyperosmotic salinity response [GO:0071475]; cellular response to DNA damage stimulus [GO:0006974]; cellular response to fatty acid [GO:0071398]; cellular response to gamma radiation [GO:0071480]; cellular response to leukemia inhibitory factor [GO:1990830]; cell…	cytosol [GO:0005829]; extracellular region [GO:0005576]; Ku70:Ku80 complex [GO:0043564]; membrane [GO:0016020]; nonhomologous end joining complex [GO:0070419]; nuclear chromosome, telomeric region [GO:0000784]; nuclear telomere cap complex [GO:0000783]; nucleolus [GO:0005730]; nucleoplasm [GO:0005654]; nucleus [GO:0005634]; plasma membrane [GO:0005886]; protein-containing complex [GO:0032991]; pr…	ATP binding [GO:0005524]; damaged DNA binding [GO:0003684]; DNA binding [GO:0003677]; DNA end binding [GO:0045027]; DNA helicase activity [GO:0003678]; double-stranded DNA binding [GO:0003690]; enzyme activator activity [GO:0008047]; protein-containing complex binding [GO:0044877]; protein C-terminus binding [GO:0008022]; RNA binding [GO:0003723]; telomeric DNA binding [GO:0042162]; transcription…	NA	189
767	P15336;A4D7U3;B8ZZU6;E9PBF9;B3KY57;H7C2N6;A4D7U9;E9PEK8;A4D7U7;A4D7V5;C9JCI8;F5H629	Sa1-IAA	-0.412858	0.614829	-0.671501	7	0.523436	0.866046	NA	0.357143	0	P15336	Cyclic AMP-dependent transcription factor ATF-2	ATF2	adipose tissue development [GO:0060612]; amelogenesis [GO:0097186]; cellular response to DNA damage stimulus [GO:0006974]; fat cell differentiation [GO:0045444]; intra-S DNA damage checkpoint [GO:0031573]; negative regulation of angiogenesis [GO:0016525]; negative regulation of epithelial cell proliferation [GO:0050680]; negative regulation of transcription by RNA polymerase II [GO:0000122]; outf…	cytoplasm [GO:0005737]; mitochondrial outer membrane [GO:0005741]; nuclear chromatin [GO:0000790]; nucleoplasm [GO:0005654]; nucleus [GO:0005634]; site of double-strand break [GO:0035861]	cAMP response element binding [GO:0035497]; cAMP response element binding protein binding [GO:0008140]; chromatin binding [GO:0003682]; cis-regulatory region sequence-specific DNA binding [GO:0000987]; DNA-binding transcription activator activity, RNA polymerase II-specific [GO:0001228]; DNA-binding transcription factor activity [GO:0003700]; DNA-binding transcription factor activity, RNA polymer…	NA	1
768	P15880;H0YEN5;E9PQD7;Q8N5L9;Q6IPX5;Q3KQT6;Q9BSW5;Q8J014;Q8NI62;O60249;E9PMM9;I3L404;A4D0Y7;E9PPT0;Q8NI61;E9PM36;Q6ZNN8;D3DU83	Sa1-IAA	-1.14276	0.634458	-1.80116	7	0.11469	0.644175	NA	0.535714	0	P15880	40S ribosomal protein S2	RPS2;rps2;OK/KNS-cl.6	cellular response to interleukin-4 [GO:0071353]; nuclear-transcribed mRNA catabolic process, nonsense-mediated decay [GO:0000184]; positive regulation of ubiquitin-protein transferase activity [GO:0051443]; rRNA processing [GO:0006364]; SRP-dependent cotranslational protein targeting to membrane [GO:0006614]; translation [GO:0006412]; translational initiation [GO:0006413]; viral transcription [GO…	cytosol [GO:0005829]; cytosolic small ribosomal subunit [GO:0022627]; extracellular exosome [GO:0070062]; focal adhesion [GO:0005925]; membrane [GO:0016020]; nucleoplasm [GO:0005654]; nucleus [GO:0005634]; synapse [GO:0045202]	cadherin binding [GO:0045296]; enzyme binding [GO:0019899]; fibroblast growth factor binding [GO:0017134]; mRNA binding [GO:0003729]; RNA binding [GO:0003723]; structural constituent of ribosome [GO:0003735]	NA	210
769	P15924;Q4LE79;B4E2A0;B4DKX6;B4DWT7;Q6ZP16;G1UI31	Sa1-IAA	0.0120661	0.549463	0.0219598	8	0.983018	0.996403	NA	0.517857	0	P15924	Desmoplakin	DSP;DSP variant protein	adherens junction organization [GO:0034332]; bundle of His cell-Purkinje myocyte adhesion involved in cell communication [GO:0086073]; cell-cell adhesion [GO:0098609]; cornification [GO:0070268]; desmosome organization [GO:0002934]; epidermis development [GO:0008544]; epithelial cell-cell adhesion [GO:0090136]; intermediate filament cytoskeleton organization [GO:0045104]; intermediate filament or…	basolateral plasma membrane [GO:0016323]; cell junction [GO:0030054]; cornified envelope [GO:0001533]; cytoplasm [GO:0005737]; desmosome [GO:0030057]; extracellular exosome [GO:0070062]; fascia adherens [GO:0005916]; ficolin-1-rich granule membrane [GO:0101003]; intercalated disc [GO:0014704]; intermediate filament [GO:0005882]; membrane [GO:0016020]; nucleus [GO:0005634]; plasma membrane [GO:000…	cell adhesive protein binding involved in bundle of His cell-Purkinje myocyte communication [GO:0086083]; protein kinase C binding [GO:0005080]; RNA binding [GO:0003723]; scaffold protein binding [GO:0097110]; structural constituent of cytoskeleton [GO:0005200]; structural molecule activity [GO:0005198]	P15924;Q4LE79;B4E2A0;B4DKX6;B4DWT7;Q6ZP16;G1UI31	126
770	P16403;Q02539;A1L407;P22492	Sa1-IAA	-1.93737	0.673469	-2.8767	7	0.0237632	0.505463	NA	0.346939	0	P16403	Histone H1.2	HIST1H1C	chromosome condensation [GO:0030261]; histone H3-K27 trimethylation [GO:0098532]; histone H3-K4 trimethylation [GO:0080182]; negative regulation of chromatin silencing [GO:0031936]; negative regulation of DNA recombination [GO:0045910]; negative regulation of transcription by RNA polymerase II [GO:0000122]; nucleosome assembly [GO:0006334]; nucleosome positioning [GO:0016584]; regulation of trans…	host cell nucleus [GO:0042025]; nuclear chromatin [GO:0000790]; nuclear euchromatin [GO:0005719]; nucleosome [GO:0000786]; nucleus [GO:0005634]; transcriptionally active chromatin [GO:0035327]	chromatin DNA binding [GO:0031490]; double-stranded DNA binding [GO:0003690]; nucleosomal DNA binding [GO:0031492]; RNA binding [GO:0003723]	P16403;Q02539;A1L407;P22492	301
771	P17029;B3KVN6;B3KRF7;E9PC66;B3KNP9;C9JRM9;Q7Z4R1	Sa1-IAA	-0.531462	0.336931	-1.57736	2	0.255437	0.761092	NA	0.5	0	P17029	Zinc finger protein with KRAB and SCAN domains 1	ZKSCAN1	regulation of transcription, DNA-templated [GO:0006355]	nucleus [GO:0005634]	DNA binding [GO:0003677]; metal ion binding [GO:0046872]	NA	1
772	P17844;B5BUE6;B4DN41;J3KTA4;B4DNG2;Q7Z2V5;Q59E92;J3QRQ7;J3QSF1;J3KRZ1;J3QR02;J3KRX8;C1IK54;J3KTQ4;X6RLV5;J3QKN9;J3QRN5;J3QS79;J3QLG9	Sa1-IAA	-0.0587303	0.310181	-0.189342	7	0.855198	0.970174	NA	0.462585	0	P17844	Probable ATP-dependent RNA helicase DDX5	DDX5;DKFZp686J01190	alternative mRNA splicing, via spliceosome [GO:0000380]; androgen receptor signaling pathway [GO:0030521]; BMP signaling pathway [GO:0030509]; epithelial to mesenchymal transition [GO:0001837]; intracellular estrogen receptor signaling pathway [GO:0030520]; intrinsic apoptotic signaling pathway by p53 class mediator [GO:0072332]; mRNA splicing, via spliceosome [GO:0000398]; mRNA transcription [GO…	catalytic step 2 spliceosome [GO:0071013]; cytoplasm [GO:0005737]; extracellular exosome [GO:0070062]; membrane [GO:0016020]; nucleolus [GO:0005730]; nucleoplasm [GO:0005654]; nucleus [GO:0005634]; ribonucleoprotein complex [GO:1990904]	androgen receptor binding [GO:0050681]; ATP binding [GO:0005524]; calcium-dependent protein binding [GO:0048306]; calmodulin binding [GO:0005516]; enzyme binding [GO:0019899]; MH2 domain binding [GO:0035500]; mRNA 3'-UTR binding [GO:0003730]; pre-mRNA binding [GO:0036002]; primary miRNA binding [GO:0070878]; promoter-specific chromatin binding [GO:1990841]; ribonucleoprotein complex binding [GO:0…	NA	247
773	P18077;C9K025;F8WBS5;F8WB72	Sa1-IAA	-0.0666655	0.738074	-0.0903235	6	0.93097	0.990127	NA	0.678571	0	P18077	60S ribosomal protein L35a	RPL35A	cytoplasmic translation [GO:0002181]; nuclear-transcribed mRNA catabolic process, nonsense-mediated decay [GO:0000184]; ribosomal large subunit biogenesis [GO:0042273]; rRNA processing [GO:0006364]; SRP-dependent cotranslational protein targeting to membrane [GO:0006614]; translation [GO:0006412]; translational initiation [GO:0006413]; viral transcription [GO:0019083]	cytosol [GO:0005829]; cytosolic large ribosomal subunit [GO:0022625]; extracellular exosome [GO:0070062]; membrane [GO:0016020]	RNA binding [GO:0003723]; structural constituent of ribosome [GO:0003735]; tRNA binding [GO:0000049]	NA	108
774	P18124;A0A024R814;A8MUD9;O95036;C9JIJ5;C9JZ88;D3DWG1	Sa1-IAA	-0.789992	0.559868	-1.41103	7	0.201098	0.731578	NA	0.52381	0	P18124	60S ribosomal protein L7	RPL7	maturation of LSU-rRNA from tricistronic rRNA transcript (SSU-rRNA, 5.8S rRNA, LSU-rRNA) [GO:0000463]; nuclear-transcribed mRNA catabolic process, nonsense-mediated decay [GO:0000184]; ribosomal large subunit biogenesis [GO:0042273]; rRNA processing [GO:0006364]; SRP-dependent cotranslational protein targeting to membrane [GO:0006614]; translation [GO:0006412]; translational initiation [GO:000641…	cytoplasm [GO:0005737]; cytosol [GO:0005829]; cytosolic large ribosomal subunit [GO:0022625]; focal adhesion [GO:0005925]; membrane [GO:0016020]; nucleolus [GO:0005730]; nucleus [GO:0005634]; polysome [GO:0005844]; postsynaptic density [GO:0014069]; ribonucleoprotein complex [GO:1990904]	DNA binding [GO:0003677]; identical protein binding [GO:0042802]; mRNA binding [GO:0003729]; RNA binding [GO:0003723]; structural constituent of ribosome [GO:0003735]	NA	175
775	P18583;D3DSF7;Q6ZRV7;J3QSZ5;H7C2G8;Q3SWV4;A0JLP4	Sa1-IAA	-0.618308	0.182366	-3.39049	7	0.0115918	0.468305	NA	0.454545	0	P18583	Protein SON	SON	microtubule cytoskeleton organization [GO:0000226]; mitotic cytokinesis [GO:0000281]; mRNA processing [GO:0006397]; negative regulation of apoptotic process [GO:0043066]; regulation of cell cycle [GO:0051726]; regulation of mRNA splicing, via spliceosome [GO:0048024]; regulation of RNA splicing [GO:0043484]; RNA splicing [GO:0008380]	nuclear speck [GO:0016607]	DNA binding [GO:0003677]; RNA binding [GO:0003723]; RS domain binding [GO:0050733]	NA	71
776	P18827;Q53H42;E9PHH3;H7C1K4;B4DRQ9	Sa1-IAA	-0.821866	0.679845	-1.2089	6	0.272174	0.780588	NA	0.357143	0	P18827	Syndecan-1	SDC1	canonical Wnt signaling pathway [GO:0060070]; cell migration [GO:0016477]; cytokine-mediated signaling pathway [GO:0019221]; glycosaminoglycan biosynthetic process [GO:0006024]; glycosaminoglycan catabolic process [GO:0006027]; inflammatory response [GO:0006954]; leukocyte migration [GO:0050900]; myoblast development [GO:0048627]; odontogenesis [GO:0042476]; positive regulation of exosomal secret…	cell surface [GO:0009986]; external side of plasma membrane [GO:0009897]; extracellular exosome [GO:0070062]; Golgi lumen [GO:0005796]; integral component of plasma membrane [GO:0005887]; lysosomal lumen [GO:0043202]; plasma membrane [GO:0005886]; protein-containing complex [GO:0032991]	identical protein binding [GO:0042802]; protein C-terminus binding [GO:0008022]	NA	2
777	P20700;E9PBF6;Q6DC98;A0A0D9SFE5;B4DZT3;A0A0D9SFY5	Sa1-IAA	0.239361	0.421166	0.568329	8	0.585406	0.877134	NA	0.406593	0	P20700	Lamin-B1	LMNB1	interleukin-12-mediated signaling pathway [GO:0035722]	lamin filament [GO:0005638]; membrane [GO:0016020]; nuclear envelope [GO:0005635]; nuclear inner membrane [GO:0005637]; nuclear matrix [GO:0016363]; nuclear membrane [GO:0031965]; nucleoplasm [GO:0005654]; nucleus [GO:0005634]	phospholipase binding [GO:0043274]; sequence-specific double-stranded DNA binding [GO:1990837]; structural molecule activity [GO:0005198]	P20700;E9PBF6;Q6DC98;A0A0D9SFE5;B4DZT3;A0A0D9SFY5	117
778	P22626;A0A384NL58;A0A024RA28;A0A087WUI2;I6L957	Sa1-IAA	-0.727139	0.695231	-1.0459	2	0.405386	0.817982	NA	0.685714	0	P22626	Heterogeneous nuclear ribonucleoproteins A2/B1	HNRNPA2B1;HNRPA2B1	G-quadruplex DNA unwinding [GO:0044806]; interleukin-12-mediated signaling pathway [GO:0035722]; miRNA transport [GO:1990428]; mRNA export from nucleus [GO:0006406]; mRNA processing [GO:0006397]; mRNA splicing, via spliceosome [GO:0000398]; negative regulation of mRNA splicing, via spliceosome [GO:0048025]; negative regulation of transcription by RNA polymerase II [GO:0000122]; positive regulatio…	Cajal body [GO:0015030]; catalytic step 2 spliceosome [GO:0071013]; chromosome, telomeric region [GO:0000781]; cytoplasm [GO:0005737]; extracellular exosome [GO:0070062]; membrane [GO:0016020]; nuclear matrix [GO:0016363]; nucleoplasm [GO:0005654]; nucleus [GO:0005634]; ribonucleoprotein complex [GO:1990904]; spliceosomal complex [GO:0005681]	G-rich strand telomeric DNA binding [GO:0098505]; identical protein binding [GO:0042802]; miRNA binding [GO:0035198]; mRNA 3'-UTR binding [GO:0003730]; N6-methyladenosine-containing RNA binding [GO:1990247]; pre-mRNA intronic binding [GO:0097157]; RNA binding [GO:0003723]; single-stranded telomeric DNA binding [GO:0043047]	NA	262
779	P23396;Q53G83;E9PL09;E9PPU1;H0YEU2;F2Z2S8;H0YF32;H0YCJ7;Q9NQS8;E9PQ96;E9PJH4;E9PK82;A7E2S3;E9PSF4;E9PQX2;H0YES8;E9PJN9	Sa1-IAA	0.19354	0.497884	0.388725	7	0.709033	0.930319	NA	0.506494	0	P23396	40S ribosomal protein S3	RPS3	apoptotic process [GO:0006915]; cell division [GO:0051301]; cellular response to DNA damage stimulus [GO:0006974]; cellular response to hydrogen peroxide [GO:0070301]; cellular response to reactive oxygen species [GO:0034614]; cellular response to tumor necrosis factor [GO:0071356]; chromosome segregation [GO:0007059]; DNA damage response, detection of DNA damage [GO:0042769]; DNA repair [GO:0006…	cytoplasm [GO:0005737]; cytosol [GO:0005829]; cytosolic small ribosomal subunit [GO:0022627]; endoplasmic reticulum [GO:0005783]; extracellular exosome [GO:0070062]; focal adhesion [GO:0005925]; membrane [GO:0016020]; mitochondrial inner membrane [GO:0005743]; mitochondrial matrix [GO:0005759]; mitotic spindle [GO:0072686]; NF-kappaB complex [GO:0071159]; nucleolus [GO:0005730]; nucleoplasm [GO:0…	class I DNA-(apurinic or apyrimidinic site) endonuclease activity [GO:0140078]; damaged DNA binding [GO:0003684]; DNA-(apurinic or apyrimidinic site) endonuclease activity [GO:0003906]; DNA binding [GO:0003677]; endodeoxyribonuclease activity [GO:0004520]; enzyme binding [GO:0019899]; Hsp70 protein binding [GO:0030544]; Hsp90 protein binding [GO:0051879]; iron-sulfur cluster binding [GO:0051536];…	NA	266
780	P25490;H0YJV7;H0YJU4;A0A494C032;Q96MM3	Sa1-IAA	-0.0554677	0.438896	-0.12638	5	0.904356	0.984803	NA	0.485714	0	P25490	Transcriptional repressor protein YY1	YY1	anterior/posterior pattern specification [GO:0009952]; camera-type eye morphogenesis [GO:0048593]; cell differentiation [GO:0030154]; cellular response to DNA damage stimulus [GO:0006974]; cellular response to interleukin-1 [GO:0071347]; cellular response to UV [GO:0034644]; chromosome organization [GO:0051276]; double-strand break repair via homologous recombination [GO:0000724]; negative regula…	cytoplasm [GO:0005737]; Ino80 complex [GO:0031011]; nuclear chromatin [GO:0000790]; nuclear matrix [GO:0016363]; nucleoplasm [GO:0005654]; nucleus [GO:0005634]; PcG protein complex [GO:0031519]; transcription regulator complex [GO:0005667]	cis-regulatory region sequence-specific DNA binding [GO:0000987]; DNA binding [GO:0003677]; DNA-binding transcription repressor activity [GO:0001217]; DNA-binding transcription repressor activity, RNA polymerase II-specific [GO:0001227]; four-way junction DNA binding [GO:0000400]; metal ion binding [GO:0046872]; RNA binding [GO:0003723]; RNA polymerase II cis-regulatory region sequence-specific D…	NA	11
781	P26599;A0A0U1RRM4;A6NLN1;A0A0D9SF20;K7EKJ7;Q59H49;A0A087WUW5;K7ELW5;K7ES59;A0A087WU68;K7EK45	Sa1-IAA	-0.833698	0.34494	-2.41693	1	0.249747	0.761092	NA	0.428571	0	P26599	Polypyrimidine tract-binding protein 1	PTBP1	fibroblast growth factor receptor signaling pathway [GO:0008543]; IRES-dependent viral translational initiation [GO:0075522]; mRNA processing [GO:0006397]; mRNA splicing, via spliceosome [GO:0000398]; negative regulation of mRNA splicing, via spliceosome [GO:0048025]; negative regulation of muscle cell differentiation [GO:0051148]; negative regulation of RNA splicing [GO:0033119]; positive regula…	extracellular exosome [GO:0070062]; membrane [GO:0016020]; nucleolus [GO:0005730]; nucleoplasm [GO:0005654]; nucleus [GO:0005634]	mRNA binding [GO:0003729]; poly-pyrimidine tract binding [GO:0008187]; pre-mRNA binding [GO:0036002]; RNA binding [GO:0003723]	NA	172
782	P27824;H0Y9Q7;Q16094;D6RGY2;Q6ZP56;D6RAQ8;D6RFL1;D6RAU8;D6RB85;D6RDP7;H0Y9H1;D6RHJ3;D6RD16	Sa1-IAA	-0.862861	0.371637	-2.32178	4	0.080978	0.618718	NA	0.632653	0	P27824	Calnexin	CANX	aging [GO:0007568]; antigen processing and presentation of exogenous peptide antigen via MHC class II [GO:0019886]; antigen processing and presentation of peptide antigen via MHC class I [GO:0002474]; clathrin-dependent endocytosis [GO:0072583]; endoplasmic reticulum unfolded protein response [GO:0030968]; interleukin-27-mediated signaling pathway [GO:0070106]; interleukin-35-mediated signaling p…	axon [GO:0030424]; dendrite cytoplasm [GO:0032839]; dendritic spine [GO:0043197]; endoplasmic reticulum [GO:0005783]; endoplasmic reticulum lumen [GO:0005788]; endoplasmic reticulum membrane [GO:0005789]; endoplasmic reticulum quality control compartment [GO:0044322]; extracellular exosome [GO:0070062]; glutamatergic synapse [GO:0098978]; integral component of lumenal side of endoplasmic reticulu…	apolipoprotein binding [GO:0034185]; calcium ion binding [GO:0005509]; carbohydrate binding [GO:0030246]; ionotropic glutamate receptor binding [GO:0035255]; RNA binding [GO:0003723]; unfolded protein binding [GO:0051082]	NA	126
783	P31689	Sa1-IAA	-0.923604	0.112473	-8.21181	0	NA	NA	NA	0.571429	0	P31689	DnaJ homolog subfamily A member 1	DNAJA1	androgen receptor signaling pathway [GO:0030521]; DNA damage response, detection of DNA damage [GO:0042769]; flagellated sperm motility [GO:0030317]; negative regulation of apoptotic process [GO:0043066]; negative regulation of establishment of protein localization to mitochondrion [GO:1903748]; negative regulation of JUN kinase activity [GO:0043508]; negative regulation of nitrosative stress-ind…	cytoplasmic side of endoplasmic reticulum membrane [GO:0098554]; cytosol [GO:0005829]; extracellular exosome [GO:0070062]; membrane [GO:0016020]; microtubule cytoskeleton [GO:0015630]; mitochondrion [GO:0005739]; nucleus [GO:0005634]; perinuclear region of cytoplasm [GO:0048471]	ATPase activator activity [GO:0001671]; ATP binding [GO:0005524]; C3HC4-type RING finger domain binding [GO:0055131]; chaperone binding [GO:0051087]; G protein-coupled receptor binding [GO:0001664]; Hsp70 protein binding [GO:0030544]; low-density lipoprotein particle receptor binding [GO:0050750]; metal ion binding [GO:0046872]; Tat protein binding [GO:0030957]; ubiquitin protein ligase binding […	NA	115
784	P31947	Sa1-IAA	1.79211	1.61842	1.10732	1	0.467606	0.838806	NA	0.571429	0	P31947	14-3-3 protein sigma	SFN	DNA damage response, signal transduction by p53 class mediator resulting in cell cycle arrest [GO:0006977]; establishment of skin barrier [GO:0061436]; intrinsic apoptotic signaling pathway in response to DNA damage [GO:0008630]; keratinization [GO:0031424]; keratinocyte development [GO:0003334]; membrane organization [GO:0061024]; negative regulation of cysteine-type endopeptidase activity invol…	cytosol [GO:0005829]; extracellular exosome [GO:0070062]; extracellular space [GO:0005615]; mitochondrion [GO:0005739]; nucleus [GO:0005634]	cadherin binding [GO:0045296]; identical protein binding [GO:0042802]; phosphoprotein binding [GO:0051219]; protein kinase binding [GO:0019901]; protein kinase C inhibitor activity [GO:0008426]	NA	116
785	P35249;C9J8M3;C9JZI1;C9JXZ7;C9JTT7;C9JGY5;F8WE44;C9JW34;H7C1P0	Sa1-IAA	-0.719379	NA	NA	0	NA	NA	NA	0.714286	0	P35249	Replication factor C subunit 4	RFC4	DNA damage response, detection of DNA damage [GO:0042769]; DNA-dependent DNA replication [GO:0006261]; DNA duplex unwinding [GO:0032508]; DNA repair [GO:0006281]; DNA replication [GO:0006260]; DNA strand elongation involved in DNA replication [GO:0006271]; error-free translesion synthesis [GO:0070987]; error-prone translesion synthesis [GO:0042276]; nucleotide-excision repair, DNA gap filling [GO…	Ctf18 RFC-like complex [GO:0031390]; DNA replication factor C complex [GO:0005663]; Elg1 RFC-like complex [GO:0031391]; nucleoplasm [GO:0005654]; nucleus [GO:0005634]	ATP binding [GO:0005524]; DNA binding [GO:0003677]; enzyme binding [GO:0019899]	NA	58
786	P35251;Q14756;A0A1W2PP02;H0Y8U4;H0Y9P8;E0CX09;D6RAD2;Q14297	Sa1-IAA	0.239769	0.305933	0.783733	7	0.45889	0.835163	NA	0.571429	0	P35251	Replication factor C subunit 1	RFC1;LLDBP	DNA clamp unloading [GO:0090618]; DNA damage response, detection of DNA damage [GO:0042769]; DNA-dependent DNA replication [GO:0006261]; error-free translesion synthesis [GO:0070987]; error-prone translesion synthesis [GO:0042276]; negative regulation of transcription by RNA polymerase II [GO:0000122]; nucleotide-excision repair, DNA gap filling [GO:0006297]; nucleotide-excision repair, DNA incis…	cytoplasm [GO:0005737]; DNA replication factor C complex [GO:0005663]; Elg1 RFC-like complex [GO:0031391]; extracellular exosome [GO:0070062]; nucleolus [GO:0005730]; nucleoplasm [GO:0005654]; nucleus [GO:0005634]	ATP binding [GO:0005524]; DNA binding [GO:0003677]; DNA clamp loader activity [GO:0003689]; DNA clamp unloader activity [GO:0061860]; double-stranded DNA binding [GO:0003690]; enzyme activator activity [GO:0008047]; protein domain specific binding [GO:0019904]; sequence-specific DNA binding [GO:0043565]	NA	50
787	P35580;Q9UE82;G1UI33;E7ERA5	Sa1-IAA	0.616099	1.05188	0.58571	2	0.617359	0.88953	NA	0.571429	0	P35580	Myosin-10	MYH10	actin filament-based movement [GO:0030048]; actomyosin structure organization [GO:0031032]; adult heart development [GO:0007512]; aorta development [GO:0035904]; axon guidance [GO:0007411]; cardiac myofibril assembly [GO:0055003]; cardiac septum development [GO:0003279]; cell adhesion [GO:0007155]; cell population proliferation [GO:0008283]; cerebellar Purkinje cell layer development [GO:0021680]…	actomyosin [GO:0042641]; brush border [GO:0005903]; cell cortex [GO:0005938]; cleavage furrow [GO:0032154]; cytoplasm [GO:0005737]; cytosol [GO:0005829]; dendritic spine [GO:0043197]; extracellular exosome [GO:0070062]; growth cone [GO:0030426]; lamellipodium [GO:0030027]; midbody [GO:0030496]; myosin complex [GO:0016459]; myosin II complex [GO:0016460]; myosin II filament [GO:0097513]; neuromusc…	actin binding [GO:0003779]; actin-dependent ATPase activity [GO:0030898]; actin filament binding [GO:0051015]; ADP binding [GO:0043531]; ATPase activity [GO:0016887]; ATP binding [GO:0005524]; calmodulin binding [GO:0005516]; microfilament motor activity [GO:0000146]; mRNA 5'-UTR binding [GO:0048027]; RNA stem-loop binding [GO:0035613]	NA	166
788	P35908	Sa1-IAA	-0.026506	1.20125	-0.0220653	7	0.983012	0.996403	NA	0	0	P35908	Keratin, type II cytoskeletal 2 epidermal	KRT2	cornification [GO:0070268]; epidermis development [GO:0008544]; intermediate filament organization [GO:0045109]; keratinization [GO:0031424]; keratinocyte activation [GO:0032980]; keratinocyte development [GO:0003334]; keratinocyte migration [GO:0051546]; keratinocyte proliferation [GO:0043616]; peptide cross-linking [GO:0018149]; positive regulation of epidermis development [GO:0045684]	cornified envelope [GO:0001533]; cytosol [GO:0005829]; extracellular exosome [GO:0070062]; extracellular space [GO:0005615]; intermediate filament [GO:0005882]; keratin filament [GO:0045095]; membrane [GO:0016020]; nucleus [GO:0005634]	cytoskeletal protein binding [GO:0008092]; structural constituent of cytoskeleton [GO:0005200]; structural constituent of skin epidermis [GO:0030280]	P35908	356
789	P36578;Q59GY2;B4DMJ6;Q53G74;H3BM89;B4DFI6;B4DMJ2;H3BTP7;H3BU31;B4DP82	Sa1-IAA	-0.525366	0.440041	-1.1939	7	0.271401	0.780566	NA	0.539683	0	P36578	60S ribosomal protein L4	RPL4	nuclear-transcribed mRNA catabolic process, nonsense-mediated decay [GO:0000184]; SRP-dependent cotranslational protein targeting to membrane [GO:0006614]; translation [GO:0006412]; translational initiation [GO:0006413]; viral transcription [GO:0019083]	cytoplasm [GO:0005737]; cytosol [GO:0005829]; cytosolic large ribosomal subunit [GO:0022625]; extracellular exosome [GO:0070062]; focal adhesion [GO:0005925]; membrane [GO:0016020]; nucleolus [GO:0005730]; nucleus [GO:0005634]; ribonucleoprotein complex [GO:1990904]; rough endoplasmic reticulum [GO:0005791]	RNA binding [GO:0003723]; structural constituent of ribosome [GO:0003735]	NA	197
790	P38159;B4E352;Q2VIN3;Q96E39;B3KRG5;H3BUY5;H3BT71;H0Y6E7;H3BNC1;H3BR27;A0A1B0GUK8;A8K8A6;O75526	Sa1-IAA	0.0422467	0.481687	0.0877056	6	0.932965	0.990127	NA	0.542857	0	P38159	RNA-binding motif protein, X chromosome;RNA-binding motif protein, X chromosome, N-terminally processed;RNA binding motif protein, X-linked-like-1	RBMX;RBMXL1	cellular response to interleukin-1 [GO:0071347]; membrane protein ectodomain proteolysis [GO:0006509]; mRNA splicing, via spliceosome [GO:0000398]; negative regulation of mRNA splicing, via spliceosome [GO:0048025]; osteoblast differentiation [GO:0001649]; positive regulation of mRNA splicing, via spliceosome [GO:0048026]; positive regulation of transcription by RNA polymerase II [GO:0045944]; pr…	catalytic step 2 spliceosome [GO:0071013]; extracellular exosome [GO:0070062]; extracellular space [GO:0005615]; membrane [GO:0016020]; nuclear euchromatin [GO:0005719]; nucleoplasm [GO:0005654]; nucleus [GO:0005634]; protein-containing complex [GO:0032991]; ribonucleoprotein complex [GO:1990904]; spliceosomal complex [GO:0005681]; supraspliceosomal complex [GO:0044530]	chromatin binding [GO:0003682]; identical protein binding [GO:0042802]; mRNA binding [GO:0003729]; protein domain specific binding [GO:0019904]; RNA binding [GO:0003723]; RNA polymerase II cis-regulatory region sequence-specific DNA binding [GO:0000978]	NA	169
791	P38432	Sa1-IAA	Inf	NA	NA	NA	NA	0	oneConditionMissing	0.904762	0	P38432	Coilin	COIL	spliceosomal snRNP assembly [GO:0000387]	Cajal body [GO:0015030]; fibrillar center [GO:0001650]; membrane [GO:0016020]; nuclear body [GO:0016604]; nucleolus [GO:0005730]; nucleoplasm [GO:0005654]; nucleus [GO:0005634]	identical protein binding [GO:0042802]; protein C-terminus binding [GO:0008022]; U1 snRNA binding [GO:0030619]; U2 snRNA binding [GO:0030620]	NA	53
792	P38935;F5H5K3;H3BRR1;F5GX64	Sa1-IAA	-1.08337	0.598882	-1.80898	5	0.130243	0.658061	NA	0.666667	0	P38935	DNA-binding protein SMUBP-2	IGHMBP2	DNA recombination [GO:0006310]; DNA repair [GO:0006281]; DNA replication [GO:0006260]; negative regulation of transcription by RNA polymerase II [GO:0000122]; translation [GO:0006412]	axon [GO:0030424]; cytoplasm [GO:0005737]; growth cone [GO:0030426]; membrane [GO:0016020]; nucleoplasm [GO:0005654]; nucleus [GO:0005634]; ribonucleoprotein complex [GO:1990904]	5'-3' DNA helicase activity [GO:0043139]; 5'-3' RNA helicase activity [GO:0032574]; ATP binding [GO:0005524]; DNA binding [GO:0003677]; DNA-dependent ATPase activity [GO:0008094]; DNA helicase activity [GO:0003678]; identical protein binding [GO:0042802]; ribosome binding [GO:0043022]; RNA binding [GO:0003723]; RNA-dependent ATPase activity [GO:0008186]; single-stranded DNA binding [GO:0003697]; …	NA	8
793	P39023;Q8TBW1;Q96QL0;Q9NY85;G5E9G0;B3KS36;Q9BT63;Q49AJ9;H7C422;H7C3M2;B5MCW2;B4DN06;F8WCR1;B2R7Y3;Q92901	Sa1-IAA	-0.647289	0.622879	-1.03919	7	0.333275	0.790424	NA	0.530612	0	P39023	60S ribosomal protein L3	RPL3;rpl3	cellular response to interleukin-4 [GO:0071353]; nuclear-transcribed mRNA catabolic process, nonsense-mediated decay [GO:0000184]; ribosomal large subunit assembly [GO:0000027]; SRP-dependent cotranslational protein targeting to membrane [GO:0006614]; translation [GO:0006412]; translational initiation [GO:0006413]; viral transcription [GO:0019083]	cytoplasm [GO:0005737]; cytosol [GO:0005829]; cytosolic large ribosomal subunit [GO:0022625]; extracellular exosome [GO:0070062]; focal adhesion [GO:0005925]; nucleolus [GO:0005730]; nucleus [GO:0005634]; protein-containing complex [GO:0032991]; synapse [GO:0045202]	5S rRNA binding [GO:0008097]; RNA binding [GO:0003723]; structural constituent of ribosome [GO:0003735]	NA	163
794	P42166	Sa1-IAA	-0.154037	0.821595	-0.187485	5	0.858651	0.970933	NA	0.738095	0	P42166	Lamina-associated polypeptide 2, isoform alpha;Thymopoietin;Thymopentin	TMPO	regulation of transcription, DNA-templated [GO:0006355]	chromatin [GO:0000785]; nuclear envelope [GO:0005635]; nucleus [GO:0005634]	cadherin binding [GO:0045296]; DNA binding [GO:0003677]; lamin binding [GO:0005521]	NA	127
795	P42345;B4DZD5;B4E2H2;B3KX59;B1AKP8;Q96QW8	Sa1-IAA	Inf	NA	NA	NA	NA	0	oneConditionMissing	0.857143	0	P42345	Serine/threonine-protein kinase mTOR	MTOR	'de novo' pyrimidine nucleobase biosynthetic process [GO:0006207]; activation of protein kinase B activity [GO:0032148]; anoikis [GO:0043276]; brain development [GO:0007420]; cardiac muscle cell development [GO:0055013]; cardiac muscle contraction [GO:0060048]; cell aging [GO:0007569]; cell cycle arrest [GO:0007050]; cellular response to amino acid starvation [GO:0034198]; cellular response to am…	cytoplasm [GO:0005737]; cytosol [GO:0005829]; dendrite [GO:0030425]; endomembrane system [GO:0012505]; endoplasmic reticulum membrane [GO:0005789]; glutamatergic synapse [GO:0098978]; Golgi membrane [GO:0000139]; lysosomal membrane [GO:0005765]; lysosome [GO:0005764]; membrane [GO:0016020]; mitochondrial outer membrane [GO:0005741]; neuronal cell body [GO:0043025]; nuclear envelope [GO:0005635]; …	ATP binding [GO:0005524]; identical protein binding [GO:0042802]; kinase activity [GO:0016301]; phosphoprotein binding [GO:0051219]; protein domain specific binding [GO:0019904]; protein kinase activity [GO:0004672]; protein kinase binding [GO:0019901]; protein serine/threonine kinase activity [GO:0004674]; ribosome binding [GO:0043022]; RNA polymerase III type 1 promoter sequence-specific DNA bi…	NA	10
796	P42677	Sa1-IAA	Inf	NA	NA	NA	NA	0	oneConditionMissing	0.714286	0	P42677	40S ribosomal protein S27	RPS27	nuclear-transcribed mRNA catabolic process, nonsense-mediated decay [GO:0000184]; ribosomal small subunit assembly [GO:0000028]; rRNA processing [GO:0006364]; SRP-dependent cotranslational protein targeting to membrane [GO:0006614]; translation [GO:0006412]; translational initiation [GO:0006413]; viral transcription [GO:0019083]	cytosol [GO:0005829]; cytosolic small ribosomal subunit [GO:0022627]; nucleoplasm [GO:0005654]; nucleus [GO:0005634]; ribosome [GO:0005840]	DNA binding [GO:0003677]; RNA binding [GO:0003723]; structural constituent of ribosome [GO:0003735]; zinc ion binding [GO:0008270]	NA	185
797	P42695;G3V1A9;Q96FA6;E9PKK4;E9PQA3;E9PLE0	Sa1-IAA	0.13092	0.736847	0.177676	4	0.867612	0.972373	NA	0.619048	0	P42695	Condensin-2 complex subunit D3	NCAPD3	cell division [GO:0051301]; chromosome separation [GO:0051304]; meiotic chromosome condensation [GO:0010032]; mitotic chromosome condensation [GO:0007076]	condensed chromosome, centromeric region [GO:0000779]; membrane [GO:0016020]; nuclear condensin complex [GO:0000799]; nuclear pericentric heterochromatin [GO:0031618]; nucleoplasm [GO:0005654]	chromatin binding [GO:0003682]; histone binding [GO:0042393]; methylated histone binding [GO:0035064]	NA	8
798	P42696;A0A384NL74;A2A2V2;Q5TCT4;H7C5M1	Sa1-IAA	0.688461	0.586164	1.17452	6	0.284686	0.783886	NA	0.628571	0	P42696	RNA-binding protein 34	RBM34	NA	nucleolus [GO:0005730]; nucleoplasm [GO:0005654]	RNA binding [GO:0003723]	NA	32
799	P43246;V9H019;Q53GS1;Q53FK0;A0A2R8YFH0;E9PHA6;A0A2R8Y6P0;A0A2R8YG02;B4DN49;Q53RU4;B4DSB9;A0A2R8Y7S8;B4DL39;V9H068;V9H023;V9H0D5;V9H062;V9H015;V9H0B2;Q0ZAJ2;Q0ZAI9;Q0ZAJ0;Q0ZAJ1;C9J809;A5JTV3;Q6VBB7;A0A2R8Y713	Sa1-IAA	-0.116024	0.48677	-0.238354	7	0.818433	0.964066	NA	0.628571	0	P43246	DNA mismatch repair protein Msh2	MSH2	B cell differentiation [GO:0030183]; B cell mediated immunity [GO:0019724]; cell cycle arrest [GO:0007050]; determination of adult lifespan [GO:0008340]; DNA recombination [GO:0006310]; DNA repair [GO:0006281]; double-strand break repair [GO:0006302]; germ cell development [GO:0007281]; intra-S DNA damage checkpoint [GO:0031573]; intrinsic apoptotic signaling pathway in response to DNA damage by …	membrane [GO:0016020]; mismatch repair complex [GO:0032300]; MutSalpha complex [GO:0032301]; MutSbeta complex [GO:0032302]; nuclear chromosome, telomeric region [GO:0000784]; nucleoplasm [GO:0005654]; nucleus [GO:0005634]	ATP binding [GO:0005524]; centromeric DNA binding [GO:0019237]; chromatin binding [GO:0003682]; damaged DNA binding [GO:0003684]; DNA binding [GO:0003677]; DNA-dependent ATPase activity [GO:0008094]; double-strand/single-strand DNA junction binding [GO:0000406]; enzyme binding [GO:0019899]; guanine/thymine mispair binding [GO:0032137]; protein C-terminus binding [GO:0008022]; protein homodimeriza…	NA	45
800	P46013;Q70L74;B4DRH3	Sa1-IAA	-0.130014	0.226008	-0.575261	7	0.583125	0.877134	NA	0.476959	0	P46013	Antigen KI-67	MKI67	cell cycle [GO:0007049]; cell population proliferation [GO:0008283]; regulation of chromatin organization [GO:1902275]; regulation of chromosome segregation [GO:0051983]; regulation of mitotic nuclear division [GO:0007088]	chromosome [GO:0005694]; membrane [GO:0016020]; nuclear body [GO:0016604]; nucleolus [GO:0005730]; nucleoplasm [GO:0005654]; nucleus [GO:0005634]	ATP binding [GO:0005524]; DNA binding [GO:0003677]; protein C-terminus binding [GO:0008022]; RNA binding [GO:0003723]	NA	80
801	P46087;F5H5X6;F5GWB7;F5H709;F5H359;F5GYR3;F5H8G6	Sa1-IAA	-0.455025	0.35138	-1.29496	7	0.236405	0.751955	NA	0.432234	0	P46087	Probable 28S rRNA (cytosine(4447)-C(5))-methyltransferase	NOP2	maturation of LSU-rRNA [GO:0000470]; positive regulation of cell population proliferation [GO:0008284]; regulation of signal transduction by p53 class mediator [GO:1901796]; regulation of transcription by RNA polymerase II [GO:0006357]; ribosomal large subunit assembly [GO:0000027]; RNA methylation [GO:0001510]; rRNA base methylation [GO:0070475]	nucleolus [GO:0005730]; nucleoplasm [GO:0005654]	RNA binding [GO:0003723]; rRNA (cytosine-C5-)-methyltransferase activity [GO:0009383]	NA	91
802	P49116;F2YGU2;C9JMI6;C9JKS0;H7C3R1;H7C3L1;Q6PHZ7	Sa1-IAA	-0.577285	2.39844	-0.240692	0	NA	NA	NA	0.785714	0	P49116	Nuclear receptor subfamily 2 group C member 2	NR2C2	anatomical structure development [GO:0048856]; cell differentiation [GO:0030154]; negative regulation of transcription by RNA polymerase II [GO:0000122]; nervous system development [GO:0007399]; positive regulation of embryonic development [GO:0040019]; positive regulation of transcription by RNA polymerase II [GO:0045944]; regulation of transcription, DNA-templated [GO:0006355]; regulation of tr…	nuclear chromatin [GO:0000790]; nucleoplasm [GO:0005654]; nucleus [GO:0005634]	DNA-binding transcription activator activity, RNA polymerase II-specific [GO:0001228]; DNA-binding transcription factor activity [GO:0003700]; DNA-binding transcription factor activity, RNA polymerase II-specific [GO:0000981]; RNA polymerase II cis-regulatory region sequence-specific DNA binding [GO:0000978]; RNA polymerase II transcription regulatory region sequence-specific DNA binding [GO:0000…	NA	3
803	P49454;Q9UHT7;A0A087WTY4	Sa1-IAA	-0.0497481	0.38749	-0.128386	3	0.905967	0.984803	NA	0.642857	0	P49454	Centromere protein F	CENPF	cell differentiation [GO:0030154]; cell division [GO:0051301]; chromosome segregation [GO:0007059]; DNA biosynthetic process [GO:0071897]; kidney development [GO:0001822]; kinetochore assembly [GO:0051382]; metaphase plate congression [GO:0051310]; mitotic cell cycle [GO:0000278]; mitotic spindle assembly checkpoint [GO:0007094]; muscle organ development [GO:0007517]; negative regulation of trans…	axoneme [GO:0005930]; centrosome [GO:0005813]; chromosome, centromeric region [GO:0000775]; ciliary basal body [GO:0036064]; ciliary transition fiber [GO:0097539]; condensed chromosome outer kinetochore [GO:0000940]; cytoplasm [GO:0005737]; cytosol [GO:0005829]; kinetochore [GO:0000776]; midbody [GO:0030496]; nuclear envelope [GO:0005635]; nuclear matrix [GO:0016363]; nucleoplasm [GO:0005654]; nu…	chromatin binding [GO:0003682]; dynein complex binding [GO:0070840]; microtubule binding [GO:0008017]; protein C-terminus binding [GO:0008022]; protein homodimerization activity [GO:0042803]; transcription factor binding [GO:0008134]	NA	9
804	P49711;A0A2R8YFL0;A0A2R8Y595;V9GY73;A6XGM9;B2RA05;Q8NI51;A0A2R8Y6Z6;A0A2R8Y6C1;B3KSE4;F5H2V8;A6XGM5	Sa1-IAA	-0.199406	1.01338	-0.196773	6	0.850501	0.967783	NA	0.761905	0	P49711	Transcriptional repressor CTCF	CTCF	chromosome segregation [GO:0007059]; DNA methylation [GO:0006306]; maintenance of DNA methylation [GO:0010216]; negative regulation of cell population proliferation [GO:0008285]; negative regulation of transcription, DNA-templated [GO:0045892]; negative regulation of transcription by RNA polymerase II [GO:0000122]; nucleosome positioning [GO:0016584]; positive regulation of gene expression [GO:00…	chromosome, centromeric region [GO:0000775]; condensed chromosome [GO:0000793]; nucleolus [GO:0005730]; nucleoplasm [GO:0005654]; nucleus [GO:0005634]	chromatin insulator sequence binding [GO:0043035]; DNA-binding transcription factor activity [GO:0003700]; DNA-binding transcription repressor activity, RNA polymerase II-specific [GO:0001227]; RNA polymerase II cis-regulatory region sequence-specific DNA binding [GO:0000978]; sequence-specific DNA binding [GO:0043565]; transcription regulatory region sequence-specific DNA binding [GO:0000976]; z…	NA	30
805	P49750;Q8NF45;H0YIQ2;F8VU51;Q86YA8;B4DMQ9;H0YI23	Sa1-IAA	-0.731704	0.686005	-1.06661	7	0.321545	0.783886	NA	0.5	0	P49750	YLP motif-containing protein 1	YLPM1;FLJ00353	regulation of telomere maintenance [GO:0032204]	cytosol [GO:0005829]; nuclear speck [GO:0016607]; nucleoplasm [GO:0005654]; nucleus [GO:0005634]	RNA binding [GO:0003723]	NA	45
806	P49756;Q16083;E9PQU5;H0YE46;E9PSE8	Sa1-IAA	0.0997972	0.485623	0.205503	6	0.843974	0.964066	NA	0.47619	0	P49756	RNA-binding protein 25	RBM25	mRNA processing [GO:0006397]; regulation of alternative mRNA splicing, via spliceosome [GO:0000381]; regulation of apoptotic process [GO:0042981]; RNA splicing [GO:0008380]	cytoplasm [GO:0005737]; nuclear speck [GO:0016607]	mRNA binding [GO:0003729]; RNA binding [GO:0003723]	NA	77
807	P49792;D3DX73;Q5JC45;Q13073;Q5JC46;F8WBP7	Sa1-IAA	0.301265	0.346861	0.868546	7	0.41388	0.821036	NA	0.518367	0	P49792	E3 SUMO-protein ligase RanBP2	RANBP2	centrosome localization [GO:0051642]; intracellular transport of virus [GO:0075733]; mRNA export from nucleus [GO:0006406]; NLS-bearing protein import into nucleus [GO:0006607]; positive regulation of glucokinase activity [GO:0033133]; positive regulation of GTPase activity [GO:0043547]; protein folding [GO:0006457]; protein peptidyl-prolyl isomerization [GO:0000413]; protein sumoylation [GO:0016…	annulate lamellae [GO:0005642]; cytoplasm [GO:0005737]; cytoplasmic periphery of the nuclear pore complex [GO:1990723]; cytosol [GO:0005829]; host cell [GO:0043657]; intracellular membrane-bounded organelle [GO:0043231]; membrane [GO:0016020]; mitochondrion [GO:0005739]; nuclear envelope [GO:0005635]; nuclear inclusion body [GO:0042405]; nuclear membrane [GO:0031965]; nuclear pore [GO:0005643]; n…	metal ion binding [GO:0046872]; protein-containing complex binding [GO:0044877]; Ran GTPase binding [GO:0008536]; RNA binding [GO:0003723]; SUMO transferase activity [GO:0019789]	NA	90
808	P49916;B7Z6I3;K7ERZ5;K7EQB6;K7ENR9;Q96DF0	Sa1-IAA	0.980116	0.376263	2.60487	2	0.121166	0.649655	NA	0.619048	0	P49916	DNA ligase 3;DNA ligase	LIG3	base-excision repair, DNA ligation [GO:0006288]; cell cycle [GO:0007049]; cell division [GO:0051301]; DNA biosynthetic process [GO:0071897]; DNA ligation [GO:0006266]; DNA ligation involved in DNA repair [GO:0051103]; DNA repair [GO:0006281]; double-strand break repair [GO:0006302]; double-strand break repair via alternative nonhomologous end joining [GO:0097681]; double-strand break repair via h…	cytoplasm [GO:0005737]; DNA ligase III-XRCC1 complex [GO:0070421]; mitochondrion [GO:0005739]; nucleoplasm [GO:0005654]; nucleus [GO:0005634]	ATP binding [GO:0005524]; DNA binding [GO:0003677]; DNA ligase (ATP) activity [GO:0003910]; DNA ligase activity [GO:0003909]; zinc ion binding [GO:0008270]	NA	20
809	P50402;Q5HY57	Sa1-IAA	-0.217797	0.499668	-0.435883	7	0.676047	0.916659	NA	0.371429	0	P50402	Emerin	EMD	cellular response to growth factor stimulus [GO:0071363]; mitotic nuclear envelope reassembly [GO:0007084]; muscle contraction [GO:0006936]; muscle organ development [GO:0007517]; negative regulation of canonical Wnt signaling pathway [GO:0090090]; negative regulation of fibroblast proliferation [GO:0048147]; positive regulation of protein export from nucleus [GO:0046827]; regulation of canonical…	cytoplasm [GO:0005737]; endoplasmic reticulum [GO:0005783]; integral component of membrane [GO:0016021]; membrane [GO:0016020]; microtubule [GO:0005874]; nuclear envelope [GO:0005635]; nuclear inner membrane [GO:0005637]; nuclear membrane [GO:0031965]; nuclear outer membrane [GO:0005640]; nucleoplasm [GO:0005654]; spindle [GO:0005819]	actin binding [GO:0003779]; beta-tubulin binding [GO:0048487]; cadherin binding [GO:0045296]	NA	82
810	P51116;I3L1Z2;A0A087WWR6	Sa1-IAA	-0.10425	0.447817	-0.232796	5	0.825149	0.964066	NA	0.589286	0	P51116	Fragile X mental retardation syndrome-related protein 2	FXR2	negative regulation of translation [GO:0017148]; positive regulation of protein phosphorylation [GO:0001934]; positive regulation of response to DNA damage stimulus [GO:2001022]; positive regulation of translation [GO:0045727]; regulation of alternative mRNA splicing, via spliceosome [GO:0000381]; regulation of filopodium assembly [GO:0051489]; regulation of mRNA stability [GO:0043488]	axon [GO:0030424]; cytoplasm [GO:0005737]; cytoplasmic ribonucleoprotein granule [GO:0036464]; cytosol [GO:0005829]; cytosolic large ribosomal subunit [GO:0022625]; dendritic filopodium [GO:1902737]; dendritic spine [GO:0043197]; dendritic spine neck [GO:0044326]; growth cone [GO:0030426]; membrane [GO:0016020]; neuronal cell body [GO:0043025]; nucleus [GO:0005634]; polysome [GO:0005844]; postsyn…	identical protein binding [GO:0042802]; mRNA 3'-UTR binding [GO:0003730]; mRNA binding [GO:0003729]; protein heterodimerization activity [GO:0046982]; protein homodimerization activity [GO:0042803]; RNA binding [GO:0003723]; translation regulator activity [GO:0045182]	NA	46
811	P51531;F6VDE0;A0A0U1RQZ9;B4DK35;B4DSC8;A0A0U1RRG6;A0A1W2PS06;A0A0U1RRD6;A0A0U1RRF8;A0A0A0MSS5;F6UH26;A0A0U1RQU0;A0A0U1RR09;F6XE55;A0A0U1RQW7;A0A0U1RRN2;B1ALG1;A0A0U1RR83;A0A0U1RQX3;F6T8Q0;B1ALG2;A0A0U1RR26;B4DNT1;Q8N9Q1;B1ALF6;A0A0U1RRJ4	Sa1-IAA	-0.370751	0.282563	-1.3121	2	0.319855	0.783886	NA	0.571429	0	P51531	Probable global transcription activator SNF2L2	SMARCA2	ATP-dependent chromatin remodeling [GO:0043044]; chromatin remodeling [GO:0006338]; negative regulation of cell growth [GO:0030308]; negative regulation of cell population proliferation [GO:0008285]; negative regulation of transcription, DNA-templated [GO:0045892]; negative regulation of transcription by RNA polymerase II [GO:0000122]; nervous system development [GO:0007399]; positive regulation …	intermediate filament cytoskeleton [GO:0045111]; intracellular membrane-bounded organelle [GO:0043231]; nBAF complex [GO:0071565]; npBAF complex [GO:0071564]; nuclear chromatin [GO:0000790]; nucleoplasm [GO:0005654]; nucleus [GO:0005634]; SWI/SNF complex [GO:0016514]	ATP binding [GO:0005524]; chromatin binding [GO:0003682]; DNA binding [GO:0003677]; DNA-dependent ATPase activity [GO:0008094]; helicase activity [GO:0004386]; histone binding [GO:0042393]; transcription coactivator activity [GO:0003713]; transcription regulatory region sequence-specific DNA binding [GO:0000976]	NA	40
812	P52272;A0A087X0X3;Q59ES8;Q7KYM9;M0R019;B4DEG4;M0R2T0;M0R0N3;M0QYQ7;Q6P2D7;M0R2I7;M0R0Y6;M0QYL3;M0QY96;Q8TCM5	Sa1-IAA	-0.540773	0.404862	-1.3357	7	0.22344	0.742967	NA	0.439153	0	P52272	Heterogeneous nuclear ribonucleoprotein M	HNRNPM;ORF	alternative mRNA splicing, via spliceosome [GO:0000380]; fibroblast growth factor receptor signaling pathway [GO:0008543]; mRNA splicing, via spliceosome [GO:0000398]; regulation of mRNA stability involved in response to oxidative stress [GO:2000815]; RNA metabolic process [GO:0016070]	catalytic step 2 spliceosome [GO:0071013]; collagen-containing extracellular matrix [GO:0062023]; cytoplasm [GO:0005737]; extracellular exosome [GO:0070062]; membrane [GO:0016020]; nuclear matrix [GO:0016363]; nucleolus [GO:0005730]; nucleoplasm [GO:0005654]; nucleus [GO:0005634]; paraspeckles [GO:0042382]; post-mRNA release spliceosomal complex [GO:0071014]; ribonucleoprotein complex [GO:1990904…	mRNA binding [GO:0003729]; protein domain specific binding [GO:0019904]; RNA binding [GO:0003723]	P52272;A0A087X0X3;Q59ES8;Q7KYM9;M0R019;B4DEG4;M0R2T0;M0R0N3;M0QYQ7;Q6P2D7;M0R2I7;M0R0Y6;M0QYL3;M0QY96;Q8TCM5	220
813	P52701;A0A494C0M1;A0A087WWJ1;Q1L838;A0A087WYT6;Q3SWU9;Q6LAI4;F8W7G9;F8WAX8;C9J7Y7	Sa1-IAA	-0.453431	0.469515	-0.965743	7	0.366344	0.792452	NA	0.479592	0	P52701	DNA mismatch repair protein Msh6	MSH6;GTBP	determination of adult lifespan [GO:0008340]; DNA repair [GO:0006281]; interstrand cross-link repair [GO:0036297]; intrinsic apoptotic signaling pathway [GO:0097193]; intrinsic apoptotic signaling pathway in response to DNA damage [GO:0008630]; isotype switching [GO:0045190]; meiotic mismatch repair [GO:0000710]; mismatch repair [GO:0006298]; negative regulation of DNA recombination [GO:0045910];…	cytosol [GO:0005829]; Golgi apparatus [GO:0005794]; intracellular membrane-bounded organelle [GO:0043231]; mismatch repair complex [GO:0032300]; MutSalpha complex [GO:0032301]; nuclear chromatin [GO:0000790]; nucleoplasm [GO:0005654]; nucleus [GO:0005634]	ATP binding [GO:0005524]; chromatin binding [GO:0003682]; damaged DNA binding [GO:0003684]; DNA-dependent ATPase activity [GO:0008094]; enzyme binding [GO:0019899]; guanine/thymine mispair binding [GO:0032137]; methylated histone binding [GO:0035064]; mismatched DNA binding [GO:0030983]	NA	56
814	P52948;A0A3B3ITD8;A0A024RCC4;H7C3P6;A8KA17;B4DWF8;Q86TI1;H0YEN4;H0YCR0;H0YCT1	Sa1-IAA	0.115462	0.177848	0.649217	7	0.53691	0.868716	NA	0.604396	0	P52948	Nuclear pore complex protein Nup98-Nup96;Nuclear pore complex protein Nup98;Nuclear pore complex protein Nup96	NUP98	intracellular transport of virus [GO:0075733]; mRNA export from nucleus [GO:0006406]; nuclear pore complex assembly [GO:0051292]; nuclear pore organization [GO:0006999]; nucleocytoplasmic transport [GO:0006913]; positive regulation of mRNA splicing, via spliceosome [GO:0048026]; protein import into nucleus [GO:0006606]; protein sumoylation [GO:0016925]; regulation of cellular response to heat [GO…	cytosol [GO:0005829]; host cell [GO:0043657]; intracellular membrane-bounded organelle [GO:0043231]; nuclear body [GO:0016604]; nuclear envelope [GO:0005635]; nuclear inclusion body [GO:0042405]; nuclear membrane [GO:0031965]; nuclear periphery [GO:0034399]; nuclear pore [GO:0005643]; nuclear pore nuclear basket [GO:0044615]; nuclear pore outer ring [GO:0031080]; nucleoplasm [GO:0005654]; ribonuc…	mRNA binding [GO:0003729]; nuclear localization sequence binding [GO:0008139]; promoter-specific chromatin binding [GO:1990841]; serine-type peptidase activity [GO:0008236]; structural constituent of nuclear pore [GO:0017056]; transcription coactivator activity [GO:0003713]; transporter activity [GO:0005215]	NA	36
815	P55081	Sa1-IAA	-0.662643	0.137797	-4.80885	2	0.0406262	0.589366	NA	0.571429	0	P55081	Microfibrillar-associated protein 1	MFAP1	mRNA splicing, via spliceosome [GO:0000398]	centrosome [GO:0005813]; extracellular region [GO:0005576]; microfibril [GO:0001527]; nucleoplasm [GO:0005654]; nucleus [GO:0005634]; U2-type precatalytic spliceosome [GO:0071005]; U2-type spliceosomal complex [GO:0005684]	RNA binding [GO:0003723]	NA	78
816	P55201;C9JDK5;C9JHC0	Sa1-IAA	-0.179134	0.125628	-1.42591	1	0.389358	0.812707	NA	0.571429	0	P55201	Peregrin	BRPF1	histone H3 acetylation [GO:0043966]; histone H3-K14 acetylation [GO:0044154]; histone H3-K23 acetylation [GO:0043972]; positive regulation of transcription, DNA-templated [GO:0045893]; regulation of signal transduction by p53 class mediator [GO:1901796]	chromosome [GO:0005694]; cytoplasm [GO:0005737]; cytosol [GO:0005829]; histone acetyltransferase complex [GO:0000123]; MOZ/MORF histone acetyltransferase complex [GO:0070776]; nucleoplasm [GO:0005654]; nucleus [GO:0005634]; plasma membrane [GO:0005886]	DNA binding [GO:0003677]; histone binding [GO:0042393]; metal ion binding [GO:0046872]	NA	5
817	P56537;B7ZBH1;A0A0U1RQV5	Sa1-IAA	-1.5074	0.249049	-6.05262	1	0.104239	0.626048	NA	0.714286	0	P56537	Eukaryotic translation initiation factor 6	EIF6	assembly of large subunit precursor of preribosome [GO:1902626]; gene silencing by miRNA [GO:0035195]; maturation of 5.8S rRNA [GO:0000460]; maturation of LSU-rRNA [GO:0000470]; mature ribosome assembly [GO:0042256]; miRNA mediated inhibition of translation [GO:0035278]; positive regulation of translation [GO:0045727]; regulation of fatty acid biosynthetic process [GO:0042304]; regulation of glyc…	cytoplasm [GO:0005737]; cytosol [GO:0005829]; extracellular exosome [GO:0070062]; lamin filament [GO:0005638]; nucleolus [GO:0005730]; nucleoplasm [GO:0005654]; nucleus [GO:0005634]; preribosome, large subunit precursor [GO:0030687]	ribosomal large subunit binding [GO:0043023]; ribosome binding [GO:0043022]; translation initiation factor activity [GO:0003743]	NA	85
818	P57740;B3KMK0;G3V1T4;H0YG15	Sa1-IAA	-0.828776	1.17315	-0.706452	7	0.502737	0.861232	NA	0.666667	0	P57740	Nuclear pore complex protein Nup107	NUP107	female gonad development [GO:0008585]; intracellular transport of virus [GO:0075733]; mRNA export from nucleus [GO:0006406]; nephron development [GO:0072006]; nuclear pore complex assembly [GO:0051292]; posttranscriptional tethering of RNA polymerase II gene DNA at nuclear periphery [GO:0000973]; protein import into nucleus [GO:0006606]; protein sumoylation [GO:0016925]; regulation of cellular re…	condensed chromosome kinetochore [GO:0000777]; cytosol [GO:0005829]; host cell [GO:0043657]; membrane [GO:0016020]; nuclear envelope [GO:0005635]; nuclear membrane [GO:0031965]; nuclear periphery [GO:0034399]; nuclear pore [GO:0005643]; nuclear pore outer ring [GO:0031080]	structural constituent of nuclear pore [GO:0017056]	NA	42
819	P62269;A0A0G2JQH2;Q5GGW2;J3JS69	Sa1-IAA	0.632099	0.377993	1.67225	5	0.155335	0.683609	NA	0.47619	0	P62269	40S ribosomal protein S18	RPS18	nuclear-transcribed mRNA catabolic process, nonsense-mediated decay [GO:0000184]; SRP-dependent cotranslational protein targeting to membrane [GO:0006614]; translation [GO:0006412]; translational initiation [GO:0006413]; viral transcription [GO:0019083]	cytosol [GO:0005829]; cytosolic small ribosomal subunit [GO:0022627]; extracellular exosome [GO:0070062]; focal adhesion [GO:0005925]; membrane [GO:0016020]; nucleoplasm [GO:0005654]; nucleus [GO:0005634]; ribosome [GO:0005840]; small ribosomal subunit [GO:0015935]; synapse [GO:0045202]	RNA binding [GO:0003723]; rRNA binding [GO:0019843]; structural constituent of ribosome [GO:0003735]	NA	229
820	P62277;J3KMX5;E9PS50	Sa1-IAA	0.950637	0.69141	1.37493	5	0.227569	0.748766	NA	0.771429	0	P62277	40S ribosomal protein S13	RPS13	negative regulation of RNA splicing [GO:0033119]; nuclear-transcribed mRNA catabolic process, nonsense-mediated decay [GO:0000184]; SRP-dependent cotranslational protein targeting to membrane [GO:0006614]; translation [GO:0006412]; translational initiation [GO:0006413]; viral transcription [GO:0019083]	cytosol [GO:0005829]; cytosolic small ribosomal subunit [GO:0022627]; extracellular exosome [GO:0070062]; focal adhesion [GO:0005925]; membrane [GO:0016020]; nucleolus [GO:0005730]; nucleoplasm [GO:0005654]; nucleus [GO:0005634]; postsynaptic density [GO:0014069]; ribosome [GO:0005840]	mRNA 5'-UTR binding [GO:0048027]; mRNA binding [GO:0003729]; RNA binding [GO:0003723]; small ribosomal subunit rRNA binding [GO:0070181]; structural constituent of ribosome [GO:0003735]	NA	158
821	P62318;H3BT13	Sa1-IAA	-0.807331	1.00602	-0.802503	1	0.569476	0.874946	NA	0.571429	0	P62318	Small nuclear ribonucleoprotein Sm D3	SNRPD3	histone mRNA metabolic process [GO:0008334]; import into nucleus [GO:0051170]; mRNA splicing, via spliceosome [GO:0000398]; protein methylation [GO:0006479]; RNA splicing [GO:0008380]; spliceosomal snRNP assembly [GO:0000387]; termination of RNA polymerase II transcription [GO:0006369]	catalytic step 2 spliceosome [GO:0071013]; commitment complex [GO:0000243]; cytosol [GO:0005829]; methylosome [GO:0034709]; nuclear body [GO:0016604]; nucleoplasm [GO:0005654]; nucleus [GO:0005634]; pICln-Sm protein complex [GO:0034715]; precatalytic spliceosome [GO:0071011]; small nuclear ribonucleoprotein complex [GO:0030532]; SMN-Sm protein complex [GO:0034719]; spliceosomal complex [GO:000568…	enzyme binding [GO:0019899]; histone pre-mRNA DCP binding [GO:0071208]; RNA binding [GO:0003723]; telomerase RNA binding [GO:0070034]; U7 snRNA binding [GO:0071209]	NA	176
822	P62424;Q5T8U3;Q9BY74;Q5T8U2	Sa1-IAA	-0.607327	0.503473	-1.20627	7	0.266894	0.774145	NA	0.52381	0	P62424	60S ribosomal protein L7a	RPL7A	maturation of LSU-rRNA [GO:0000470]; nuclear-transcribed mRNA catabolic process, nonsense-mediated decay [GO:0000184]; SRP-dependent cotranslational protein targeting to membrane [GO:0006614]; translation [GO:0006412]; translational initiation [GO:0006413]; viral transcription [GO:0019083]	cytoplasm [GO:0005737]; cytosol [GO:0005829]; cytosolic large ribosomal subunit [GO:0022625]; focal adhesion [GO:0005925]; membrane [GO:0016020]; nucleolus [GO:0005730]; nucleus [GO:0005634]; polysomal ribosome [GO:0042788]	cadherin binding [GO:0045296]; RNA binding [GO:0003723]; structural constituent of ribosome [GO:0003735]	NA	197
823	P62750;H7BY10;K7EJV9;K7ERT8;A8MUS3;K7EMA7;O95014;B9EJE3	Sa1-IAA	-1.21313	1.08276	-1.12041	4	0.325261	0.783886	NA	0.535714	0	P62750	60S ribosomal protein L23a	RPL23A	nuclear-transcribed mRNA catabolic process, nonsense-mediated decay [GO:0000184]; ribosomal large subunit assembly [GO:0000027]; SRP-dependent cotranslational protein targeting to membrane [GO:0006614]; translation [GO:0006412]; translational initiation [GO:0006413]; viral transcription [GO:0019083]	cytoplasm [GO:0005737]; cytosol [GO:0005829]; cytosolic large ribosomal subunit [GO:0022625]; extracellular exosome [GO:0070062]; nucleolus [GO:0005730]; nucleus [GO:0005634]	cadherin binding [GO:0045296]; RNA binding [GO:0003723]; rRNA binding [GO:0019843]; structural constituent of ribosome [GO:0003735]; TORC2 complex binding [GO:1904841]	NA	224
824	P62851	Sa1-IAA	-0.321448	0.698258	-0.460357	4	0.669174	0.912563	NA	0.357143	0	P62851	40S ribosomal protein S25	RPS25	nuclear-transcribed mRNA catabolic process, nonsense-mediated decay [GO:0000184]; SRP-dependent cotranslational protein targeting to membrane [GO:0006614]; translation [GO:0006412]; translational initiation [GO:0006413]; viral transcription [GO:0019083]	cytosol [GO:0005829]; cytosolic small ribosomal subunit [GO:0022627]; extracellular exosome [GO:0070062]; nucleolus [GO:0005730]; nucleoplasm [GO:0005654]; nucleus [GO:0005634]; ribosome [GO:0005840]; small ribosomal subunit [GO:0015935]; synapse [GO:0045202]	RNA binding [GO:0003723]; structural constituent of ribosome [GO:0003735]	NA	196
825	P62906;Q1JQ76;A0A024RCW3	Sa1-IAA	-1.44679	0.577522	-2.50516	6	0.0462047	0.612662	NA	0.714286	0	P62906	60S ribosomal protein L10a;Ribosomal protein	RPL10A	cytoplasmic translation [GO:0002181]; maturation of LSU-rRNA [GO:0000470]; nuclear-transcribed mRNA catabolic process, nonsense-mediated decay [GO:0000184]; SRP-dependent cotranslational protein targeting to membrane [GO:0006614]; translation [GO:0006412]; translational initiation [GO:0006413]; viral transcription [GO:0019083]	cytosol [GO:0005829]; cytosolic large ribosomal subunit [GO:0022625]; extracellular exosome [GO:0070062]; focal adhesion [GO:0005925]; membrane [GO:0016020]; nucleus [GO:0005634]; polysomal ribosome [GO:0042788]	RNA binding [GO:0003723]; structural constituent of ribosome [GO:0003735]	NA	117
826	P62917;E9PKZ0;G3V1A1;E9PKU4;E9PP36;B4DVG7	Sa1-IAA	-0.617692	0.728701	-0.847662	7	0.424658	0.823824	NA	0.314286	0	P62917	60S ribosomal protein L8	RPL8	cytoplasmic translation [GO:0002181]; nuclear-transcribed mRNA catabolic process, nonsense-mediated decay [GO:0000184]; SRP-dependent cotranslational protein targeting to membrane [GO:0006614]; translation [GO:0006412]; translational initiation [GO:0006413]; viral transcription [GO:0019083]	cytosol [GO:0005829]; cytosolic large ribosomal subunit [GO:0022625]; focal adhesion [GO:0005925]; membrane [GO:0016020]; polysomal ribosome [GO:0042788]; synapse [GO:0045202]	RNA binding [GO:0003723]; rRNA binding [GO:0019843]; structural constituent of ribosome [GO:0003735]	NA	157
827	P63261;B4E3A4;B4DVQ0;I3L3I0;I3L1U9;I3L4N8;K7EM38;I3L3R2;J3KT65;A1E282	Sa1-IAA	-0.695401	1.2144	-0.572631	6	0.587694	0.877134	NA	0.428571	0	P63261	Actin, cytoplasmic 2;Actin, cytoplasmic 2, N-terminally processed	ACTG1	angiogenesis [GO:0001525]; cell junction assembly [GO:0034329]; cellular response to interferon-gamma [GO:0071346]; ephrin receptor signaling pathway [GO:0048013]; Fc-gamma receptor signaling pathway involved in phagocytosis [GO:0038096]; maintenance of blood-brain barrier [GO:0035633]; membrane organization [GO:0061024]; morphogenesis of a polarized epithelium [GO:0001738]; platelet aggregation …	actin filament [GO:0005884]; apical junction complex [GO:0043296]; basal body patch [GO:0120220]; blood microparticle [GO:0072562]; cell-cell junction [GO:0005911]; cytoskeleton [GO:0005856]; cytosol [GO:0005829]; dense body [GO:0097433]; extracellular exosome [GO:0070062]; extracellular space [GO:0005615]; filamentous actin [GO:0031941]; focal adhesion [GO:0005925]; membrane [GO:0016020]; myofib…	ATP binding [GO:0005524]; identical protein binding [GO:0042802]; profilin binding [GO:0005522]; structural constituent of cytoskeleton [GO:0005200]; structural constituent of postsynaptic actin cytoskeleton [GO:0098973]; ubiquitin protein ligase binding [GO:0031625]	NA	363
828	P67809;H0Y449;Q6PKI6;A0JLU4;Q2VIK8;Q7KZ24;C9J5V9;B2RCC2;A0A384MDP4;Q9Y2T7;Q15905;Q59HE1	Sa1-IAA	-0.136881	0.482844	-0.28349	7	0.785003	0.95116	NA	0.454545	0	P67809	Nuclease-sensitive element-binding protein 1	YBX1	CRD-mediated mRNA stabilization [GO:0070934]; embryonic morphogenesis [GO:0048598]; epidermis development [GO:0008544]; miRNA transport [GO:1990428]; mRNA splicing, via spliceosome [GO:0000398]; mRNA stabilization [GO:0048255]; negative regulation of cellular senescence [GO:2000773]; negative regulation of translation [GO:0017148]; Notch signaling pathway [GO:0007219]; positive regulation of cell…	CRD-mediated mRNA stability complex [GO:0070937]; cytoplasm [GO:0005737]; cytoplasmic stress granule [GO:0010494]; cytosol [GO:0005829]; extracellular exosome [GO:0070062]; extracellular region [GO:0005576]; histone pre-mRNA 3'end processing complex [GO:0071204]; intracellular membrane-bounded organelle [GO:0043231]; messenger ribonucleoprotein complex [GO:1990124]; nuclear membrane [GO:0031965];…	C5-methylcytidine-containing RNA binding [GO:0062153]; DNA binding [GO:0003677]; DNA-binding transcription activator activity, RNA polymerase II-specific [GO:0001228]; DNA-binding transcription factor activity, RNA polymerase II-specific [GO:0000981]; double-stranded DNA binding [GO:0003690]; GTPase binding [GO:0051020]; miRNA binding [GO:0035198]; nucleic acid binding [GO:0003676]; RNA binding […	NA	233
829	P78527;B4DL41;H0YG84;F5GX40	Sa1-IAA	-0.320881	0.416969	-0.769557	7	0.466732	0.838806	NA	0.466359	0	P78527	DNA-dependent protein kinase catalytic subunit	PRKDC	activation of innate immune response [GO:0002218]; B cell lineage commitment [GO:0002326]; brain development [GO:0007420]; cellular protein modification process [GO:0006464]; cellular response to DNA damage stimulus [GO:0006974]; cellular response to insulin stimulus [GO:0032869]; double-strand break repair [GO:0006302]; double-strand break repair via alternative nonhomologous end joining [GO:009…	cytosol [GO:0005829]; DNA-dependent protein kinase-DNA ligase 4 complex [GO:0005958]; membrane [GO:0016020]; nonhomologous end joining complex [GO:0070419]; nuclear chromosome, telomeric region [GO:0000784]; nucleolus [GO:0005730]; nucleoplasm [GO:0005654]; nucleus [GO:0005634]; protein-containing complex [GO:0032991]; protein-DNA complex [GO:0032993]; small-subunit processome [GO:0032040]; trans…	ATP binding [GO:0005524]; DNA-dependent protein kinase activity [GO:0004677]; double-stranded DNA binding [GO:0003690]; enzyme binding [GO:0019899]; protein domain specific binding [GO:0019904]; protein kinase activity [GO:0004672]; protein serine/threonine kinase activity [GO:0004674]; RNA binding [GO:0003723]; transcription factor binding [GO:0008134]; U3 snoRNA binding [GO:0034511]	NA	175
830	P81605	Sa1-IAA	1.49753	0.939394	1.59415	9	0.145367	0.6651	NA	0.52381	0	P81605	Dermcidin;Survival-promoting peptide;DCD-1	DCD	antimicrobial humoral immune response mediated by antimicrobial peptide [GO:0061844]; antimicrobial humoral response [GO:0019730]; defense response to bacterium [GO:0042742]; defense response to fungus [GO:0050832]; defense response to Gram-negative bacterium [GO:0050829]; defense response to Gram-positive bacterium [GO:0050830]; killing by host of symbiont cells [GO:0051873]; killing of cells of…	extracellular exosome [GO:0070062]; extracellular region [GO:0005576]; extracellular space [GO:0005615]	peptidase activity [GO:0008233]; RNA binding [GO:0003723]	P81605	178
831	P82675;B4DIW8	Sa1-IAA	#NAME?	NA	NA	NA	NA	0	oneConditionMissing	0.714286	0	P82675	28S ribosomal protein S5, mitochondrial	MRPS5	mitochondrial translational elongation [GO:0070125]; mitochondrial translational termination [GO:0070126]; translation [GO:0006412]	mitochondrial inner membrane [GO:0005743]; mitochondrial small ribosomal subunit [GO:0005763]; mitochondrion [GO:0005739]	RNA binding [GO:0003723]; structural constituent of ribosome [GO:0003735]	NA	32
832	Q00839;B3KX72;B4DLR3;Q96BA7;A0A1W2PPS1;A0A1X7SBS1;Q5RI18;A0A1W2PP35;Q7Z4Q5;A0A1W2PPL4;A0A1W2PPH7;A0A1W2PQL0;A0A1W2PP34;A0A1W2PQ74;A0A1W2PRZ7;A0A1W2PQD4;Q9UEL2;A0A1W2PRI6;A0A1W2PPE9;M0QYG9;M0QYM5;A0A1W2PP22	Sa1-IAA	-0.767092	0.343009	-2.23636	7	0.0604014	0.618718	NA	0.47619	0	Q00839	Heterogeneous nuclear ribonucleoprotein U	HNRNPU;HNRPU	adaptive thermogenesis [GO:1990845]; cardiac muscle cell development [GO:0055013]; cell cycle [GO:0007049]; cell division [GO:0051301]; cellular response to glucocorticoid stimulus [GO:0071385]; cellular response to leukemia inhibitory factor [GO:1990830]; chromatin organization [GO:0006325]; circadian regulation of gene expression [GO:0032922]; CRD-mediated mRNA stabilization [GO:0070934]; dendr…	catalytic step 2 spliceosome [GO:0071013]; cell surface [GO:0009986]; centrosome [GO:0005813]; condensed chromosome kinetochore [GO:0000777]; CRD-mediated mRNA stability complex [GO:0070937]; cytoplasmic ribonucleoprotein granule [GO:0036464]; dendrite cytoplasm [GO:0032839]; inactive sex chromosome [GO:0098577]; kinetochore [GO:0000776]; membrane [GO:0016020]; midbody [GO:0030496]; mitotic spind…	actin binding [GO:0003779]; ATP binding [GO:0005524]; chromatin binding [GO:0003682]; chromatin DNA binding [GO:0031490]; DNA binding [GO:0003677]; double-stranded DNA binding [GO:0003690]; double-stranded RNA binding [GO:0003725]; identical protein binding [GO:0042802]; mRNA 3'-UTR binding [GO:0003730]; poly(A) binding [GO:0008143]; poly(C) RNA binding [GO:0017130]; poly(G) binding [GO:0034046];…	NA	280
833	Q01780;B4DKG8;B4DFE4;Q59G73;K7EJ37	Sa1-IAA	-0.0192292	0.387665	-0.0496026	7	0.961825	0.996403	NA	0.544218	0	Q01780	Exosome component 10	EXOSC10	CUT catabolic process [GO:0071034]; dosage compensation by inactivation of X chromosome [GO:0009048]; exonucleolytic trimming to generate mature 3'-end of 5.8S rRNA from tricistronic rRNA transcript (SSU-rRNA, 5.8S rRNA, LSU-rRNA) [GO:0000467]; histone mRNA catabolic process [GO:0071044]; maturation of 5.8S rRNA [GO:0000460]; negative regulation of telomere maintenance via telomerase [GO:0032211]…	cytoplasm [GO:0005737]; cytosol [GO:0005829]; exosome (RNase complex) [GO:0000178]; membrane [GO:0016020]; nuclear exosome (RNase complex) [GO:0000176]; nucleolus [GO:0005730]; nucleoplasm [GO:0005654]; nucleus [GO:0005634]; transcriptionally active chromatin [GO:0035327]	3'-5'-exoribonuclease activity [GO:0000175]; exoribonuclease activity [GO:0004532]; nucleotide binding [GO:0000166]; RNA binding [GO:0003723]; single-stranded RNA binding [GO:0003727]; telomerase RNA binding [GO:0070034]	NA	70
834	Q01804	Sa1-IAA	#NAME?	NA	NA	NA	NA	0	oneConditionMissing	0.714286	0	Q01804	OTU domain-containing protein 4	OTUD4	innate immune response [GO:0045087]; negative regulation of interleukin-1-mediated signaling pathway [GO:2000660]; negative regulation of toll-like receptor signaling pathway [GO:0034122]; positive regulation of DNA demethylation [GO:1901537]; protein deubiquitination [GO:0016579]; protein K48-linked deubiquitination [GO:0071108]; protein K63-linked deubiquitination [GO:0070536]; regulation of pr…	cytosol [GO:0005829]; nucleus [GO:0005634]	Lys63-specific deubiquitinase activity [GO:0061578]; molecular adaptor activity [GO:0060090]; RNA binding [GO:0003723]; thiol-dependent ubiquitin-specific protease activity [GO:0004843]	NA	40
835	Q02040;X6RAJ1;Q05DA9	Sa1-IAA	-0.970132	0.529239	-1.83307	4	0.140725	0.6651	NA	0.571429	0	Q02040	A-kinase anchor protein 17A	AKAP17A	B cell activation [GO:0042113]; mRNA processing [GO:0006397]; regulation of RNA splicing [GO:0043484]; regulation of transcription, DNA-templated [GO:0006355]; RNA splicing [GO:0008380]; signal transduction [GO:0007165]	cytosol [GO:0005829]; nuclear speck [GO:0016607]; nucleus [GO:0005634]; spliceosomal complex [GO:0005681]	protein kinase A binding [GO:0051018]; RNA binding [GO:0003723]	NA	19
836	Q02413	Sa1-IAA	0.0268877	0.628089	0.0428087	6	0.967243	0.996403	NA	0.603175	0	Q02413	Desmoglein-1	DSG1	calcium-dependent cell-cell adhesion via plasma membrane cell adhesion molecules [GO:0016339]; cell-cell adhesion [GO:0098609]; cell-cell junction assembly [GO:0007043]; cornification [GO:0070268]; homophilic cell adhesion via plasma membrane adhesion molecules [GO:0007156]; keratinization [GO:0031424]; maternal process involved in female pregnancy [GO:0060135]; neutrophil degranulation [GO:00433…	apical plasma membrane [GO:0016324]; cornified envelope [GO:0001533]; cytoplasmic side of plasma membrane [GO:0009898]; cytosol [GO:0005829]; desmosome [GO:0030057]; ficolin-1-rich granule membrane [GO:0101003]; integral component of membrane [GO:0016021]; lateral plasma membrane [GO:0016328]; plasma membrane [GO:0005886]	calcium ion binding [GO:0005509]; gamma-catenin binding [GO:0045295]; toxic substance binding [GO:0015643]	Q02413	82
837	Q03164;E9PR05;A0A3B3ITZ1;B3W6H7;Q1HA41;Q86YP0;Q86YN8;Q0ZHH1;A0A410RF37;A0A2Z5DI30;Q86YP1;D3K0R4;Q9HB83;B3W6H4;Q86YN9;Q9HB82;Q9HB88;Q9HB87;Q9HBJ4;A0A346G3H9;A2JNH1;Q9HB81;Q8NFI1;A2JNH3;A2JNH2;Q8NFI2;Q8NFI0;Q8NFH9;A0A3S6YZ73;H7C5W4;Q9HB80;B4DIJ7;Q9UPD0;Q9Y6P1;A0A3B3ISN4;B4E012	Sa1-IAA	-0.433349	0.382351	-1.13338	6	0.300301	0.783886	NA	0.469388	0	Q03164	Histone-lysine N-methyltransferase 2A;MLL cleavage product N320;MLL cleavage product C180	KMT2A	apoptotic process [GO:0006915]; circadian regulation of gene expression [GO:0032922]; embryonic hemopoiesis [GO:0035162]; histone H3-K4 dimethylation [GO:0044648]; histone H3-K4 methylation [GO:0051568]; histone H3-K4 monomethylation [GO:0097692]; histone H3-K4 trimethylation [GO:0080182]; histone H4-K16 acetylation [GO:0043984]; negative regulation of DNA methylation [GO:1905642]; positive regul…	cytosol [GO:0005829]; histone methyltransferase complex [GO:0035097]; MLL1 complex [GO:0071339]; nucleoplasm [GO:0005654]; nucleus [GO:0005634]	AT DNA binding [GO:0003680]; DNA-binding transcription factor activity, RNA polymerase II-specific [GO:0000981]; histone methyltransferase activity (H3-K4 specific) [GO:0042800]; identical protein binding [GO:0042802]; lysine-acetylated histone binding [GO:0070577]; protein homodimerization activity [GO:0042803]; transcription regulatory region sequence-specific DNA binding [GO:0000976]; unmethyl…	NA	23
838	Q03188;H0Y8J2;H0Y9W1	Sa1-IAA	-0.330075	0.277508	-1.18942	5	0.287671	0.783886	NA	0.553571	0	Q03188	Centromere protein C	CENPC	attachment of mitotic spindle microtubules to kinetochore [GO:0051315]; cell division [GO:0051301]; CENP-A containing nucleosome assembly [GO:0034080]; chromosome segregation [GO:0007059]; kinetochore assembly [GO:0051382]; mitotic cell cycle [GO:0000278]; monopolar spindle attachment to meiosis I kinetochore [GO:0051455]	condensed nuclear chromosome, centromeric region [GO:0000780]; condensed nuclear chromosome kinetochore [GO:0000778]; cytosol [GO:0005829]; kinetochore [GO:0000776]; midbody [GO:0030496]; nuclear body [GO:0016604]; nucleoplasm [GO:0005654]; pericentric heterochromatin [GO:0005721]	centromeric DNA binding [GO:0019237]; DNA binding [GO:0003677]; identical protein binding [GO:0042802]	NA	10
839	Q03252;A0A384NPH0;A0A0A7M1X5	Sa1-IAA	0.350621	0.377994	0.927583	8	0.380758	0.809931	NA	0.416149	0	Q03252	Lamin-B2	LMNB2	NA	lamin filament [GO:0005638]; nuclear inner membrane [GO:0005637]; nuclear membrane [GO:0031965]	identical protein binding [GO:0042802]	Q03252;A0A384NPH0;A0A0A7M1X5	68
840	Q03701;B2R5U7;C9J9W7	Sa1-IAA	-0.715066	0.636627	-1.12321	5	0.312367	0.783886	NA	0.597403	0	Q03701	CCAAT/enhancer-binding protein zeta	CEBPZ	positive regulation of transcription by RNA polymerase II [GO:0045944]; ribosome biogenesis [GO:0042254]	nucleus [GO:0005634]	DNA-binding transcription activator activity, RNA polymerase II-specific [GO:0001228]; DNA-binding transcription factor activity, RNA polymerase II-specific [GO:0000981]; RNA binding [GO:0003723]; RNA polymerase II cis-regulatory region sequence-specific DNA binding [GO:0000978]; transcription coactivator activity [GO:0003713]	NA	39
841	Q05519;Q05BU6;Q6PJY9;Q6PKC9;Q5T760;Q6PJB9;B4DWT1;B4DTC1;Q6MZM2;Q6N079;Q5T757;S4R3C4;Q5HYN2	Sa1-IAA	#NAME?	NA	NA	NA	NA	0	oneConditionMissing	0.857143	0	Q05519	Serine/arginine-rich splicing factor 11	SRSF11;SFRS11	mRNA 3'-end processing [GO:0031124]; mRNA export from nucleus [GO:0006406]; mRNA processing [GO:0006397]; mRNA splicing, via spliceosome [GO:0000398]; RNA export from nucleus [GO:0006405]; RNA splicing [GO:0008380]	nuclear speck [GO:0016607]; nucleoplasm [GO:0005654]; nucleus [GO:0005634]	identical protein binding [GO:0042802]; RNA binding [GO:0003723]	NA	97
842	Q05C46	Sa1-IAA	Inf	NA	NA	NA	NA	0	oneConditionMissing	0.714286	0	Q05C46	NA	CASC5	attachment of spindle microtubules to kinetochore [GO:0008608]; cell division [GO:0051301]; protein localization to kinetochore [GO:0034501]	NA	NA	NA	24
843	Q05CW7;E9PMU0;E9PJN6	Sa1-IAA	0.0965248	0.643952	0.149894	2	0.894599	0.984803	NA	0.642857	0	Q05CW7	NA	NAT10	NA	NA	ATP binding [GO:0005524]; N-acetyltransferase activity [GO:0008080]	NA	70
844	Q05DF2;Q15428;K7EMT0	Sa1-IAA	-1.21856	0.544268	-2.23889	4	0.0887309	0.618718	NA	0.571429	0	Q05DF2	Splicing factor 3A subunit 2	SF3A2	mRNA processing [GO:0006397]; RNA splicing [GO:0008380]	spliceosomal complex [GO:0005681]	nucleic acid binding [GO:0003676]; zinc ion binding [GO:0008270]	NA	83
845	Q05DU1;A0A024R9Y6;Q9NVN8	Sa1-IAA	-2.44774	0.976935	-2.50553	4	0.0663736	0.618718	NA	0.785714	0	Q05DU1	Guanine nucleotide-binding protein-like 3-like protein	GNL3L	NA	NA	GTP binding [GO:0005525]	NA	30
846	Q08211;Q58F26;Q6PJK6;B3KU66	Sa1-IAA	-0.607312	0.301952	-2.01128	7	0.0842061	0.618718	NA	0.458472	0	Q08211	ATP-dependent RNA helicase A	DHX9	alternative mRNA splicing, via spliceosome [GO:0000380]; cellular protein-containing complex assembly [GO:0034622]; cellular response to exogenous dsRNA [GO:0071360]; cellular response to tumor necrosis factor [GO:0071356]; CRD-mediated mRNA stabilization [GO:0070934]; DNA duplex unwinding [GO:0032508]; DNA replication [GO:0006260]; DNA-templated transcription, termination [GO:0006353]; DNA-templ…	actin cytoskeleton [GO:0015629]; centrosome [GO:0005813]; CRD-mediated mRNA stability complex [GO:0070937]; cytoplasm [GO:0005737]; cytoplasmic ribonucleoprotein granule [GO:0036464]; cytosol [GO:0005829]; membrane [GO:0016020]; nuclear body [GO:0016604]; nuclear stress granule [GO:0097165]; nucleolus [GO:0005730]; nucleoplasm [GO:0005654]; nucleus [GO:0005634]; perichromatin fibrils [GO:0005726]…	3'-5' DNA/RNA helicase activity [GO:0033679]; 3'-5' DNA helicase activity [GO:0043138]; 3'-5' RNA helicase activity [GO:0034458]; ATPase activity [GO:0016887]; ATP binding [GO:0005524]; chromatin DNA binding [GO:0031490]; DNA binding [GO:0003677]; DNA helicase activity [GO:0003678]; DNA replication origin binding [GO:0003688]; double-stranded DNA binding [GO:0003690]; double-stranded RNA binding …	NA	205
847	Q08ES8	Sa1-IAA	-0.607923	0.00388205	-156.598	0	NA	NA	NA	0.571429	0	Q08ES8	NA	NA	translation [GO:0006412]	ribosome [GO:0005840]	structural constituent of ribosome [GO:0003735]	NA	0
848	Q08J23;A0A140T9Y7	Sa1-IAA	-0.480484	0.640436	-0.750245	2	0.531359	0.868378	NA	0.428571	0	Q08J23	tRNA (cytosine(34)-C(5))-methyltransferase	NSUN2	cell division [GO:0051301]; hair follicle maturation [GO:0048820]; meiotic cell cycle checkpoint [GO:0033313]; mRNA methylation [GO:0080009]; regulation of mRNA export from nucleus [GO:0010793]; regulation of stem cell differentiation [GO:2000736]; RNA methylation [GO:0001510]; spermatid development [GO:0007286]; tRNA methylation [GO:0030488]; tRNA modification [GO:0006400]; tRNA stabilization [G…	chromatoid body [GO:0033391]; cytoplasm [GO:0005737]; extracellular exosome [GO:0070062]; mitochondrion [GO:0005739]; nucleolus [GO:0005730]; nucleoplasm [GO:0005654]; nucleus [GO:0005634]; spindle [GO:0005819]	methyltransferase activity [GO:0008168]; mRNA (cytidine-5-)-methyltransferase activity [GO:0062152]; RNA binding [GO:0003723]; tRNA (cytosine-5-)-methyltransferase activity [GO:0016428]; tRNA binding [GO:0000049]	NA	78
849	Q09028;H0YF10;H0YCT5;H0YDK2;E9PNS2;E9PIC4;E9PNS6;H0YEU5;B4DRT0;C9JPP3	Sa1-IAA	-0.160119	0.471123	-0.339867	7	0.743927	0.941025	NA	0.428571	0	Q09028	Histone-binding protein RBBP4	RBBP4	ATP-dependent chromatin remodeling [GO:0043044]; cell cycle [GO:0007049]; CENP-A containing nucleosome assembly [GO:0034080]; chromatin assembly [GO:0031497]; chromatin remodeling [GO:0006338]; DNA replication [GO:0006260]; DNA replication-dependent nucleosome assembly [GO:0006335]; DNA replication-independent nucleosome assembly [GO:0006336]; negative regulation of cell population proliferation …	CAF-1 complex [GO:0033186]; cytosol [GO:0005829]; ESC/E(Z) complex [GO:0035098]; nuclear chromatin [GO:0000790]; nucleoplasm [GO:0005654]; nucleus [GO:0005634]; NuRD complex [GO:0016581]; NURF complex [GO:0016589]; protein-containing complex [GO:0032991]; Sin3 complex [GO:0016580]	histone binding [GO:0042393]; histone deacetylase binding [GO:0042826]; RNA polymerase II cis-regulatory region sequence-specific DNA binding [GO:0000978]	NA	148
850	Q09666;B4DTV0;Q6ZQN2;Q8N274;Q13727;E9PQE3;E9PJZ0;E9PKR9;E9PJC6;E9PLK4;Q96EC4;Q9BVU3	Sa1-IAA	-2.68581	0.918544	-2.92399	2	0.099766	0.618718	NA	0.761905	0	Q09666	Neuroblast differentiation-associated protein AHNAK	AHNAK	regulation of RNA splicing [GO:0043484]; regulation of voltage-gated calcium channel activity [GO:1901385]	actin cytoskeleton [GO:0015629]; cell-cell contact zone [GO:0044291]; costamere [GO:0043034]; cytoplasm [GO:0005737]; cytosol [GO:0005829]; extracellular exosome [GO:0070062]; focal adhesion [GO:0005925]; lysosomal membrane [GO:0005765]; membrane [GO:0016020]; nucleus [GO:0005634]; plasma membrane [GO:0005886]; sarcolemma [GO:0042383]; T-tubule [GO:0030315]; vesicle [GO:0031982]	cadherin binding [GO:0045296]; identical protein binding [GO:0042802]; RNA binding [GO:0003723]; S100 protein binding [GO:0044548]; structural molecule activity conferring elasticity [GO:0097493]	NA	62
851	Q0EFA5;A8K9C1;A0A1U9X8Y9;A0A1U9X8X8;A0A1U9X8X5;Q2L6G8;M1SWB8;G8JLG2;D2IYL2;A0A1U9X901;A0A1U9X8Z0;A0A1U9X8X6;Q15517	Sa1-IAA	-0.521302	1.34711	-0.386977	0	NA	NA	NA	0.714286	0	Q0EFA5	Corneodesmosin	S;CDSN	skin morphogenesis [GO:0043589]	extracellular region [GO:0005576]	NA	NA	46
852	Q0P607;O95104	Sa1-IAA	0.638952	0.174078	3.6705	3	0.034988	0.58802	NA	0.642857	0	Q0P607	Splicing factor, arginine/serine-rich 15	SFRS15;SCAF4	NA	NA	RNA binding [GO:0003723]	NA	23
853	Q0VAB1;A0A024R0M6;Q3ZCQ8;M0QXC3;M0R2Z3;M0R303;M0R2D2;M0R1Y4;M0R003;M0R047;M0R0C3;M0R2F8	Sa1-IAA	-0.855799	0.22165	-3.86104	2	0.0610057	0.618718	NA	0.666667	0	Q0VAB1	Mitochondrial import inner membrane translocase subunit TIM50	TIMM50	protein transport [GO:0015031]	integral component of membrane [GO:0016021]; TIM23 mitochondrial import inner membrane translocase complex [GO:0005744]	NA	NA	124
854	Q0VGD6;B2R7W4;O43390;B4DMB1;Q6MZS5;B4DT28;B4DMD1;Q7Z334;A0A286YEZ8	Sa1-IAA	-1.3213	0.879214	-1.50282	6	0.183574	0.72394	NA	0.742857	0	Q0VGD6	Heterogeneous nuclear ribonucleoprotein R	HNRPR;HNRNPR;DKFZp686A13234	NA	NA	RNA binding [GO:0003723]	NA	188
855	Q10570;D3DWL9;B4DEF4;E9PIM1;A0A087WTV4;A0A087X101;Q9C0J6	Sa1-IAA	0.423051	0.354371	1.19381	4	0.298512	0.783886	NA	0.571429	0	Q10570	Cleavage and polyadenylation specificity factor subunit 1	CPSF1	mRNA 3'-end processing [GO:0031124]; mRNA export from nucleus [GO:0006406]; mRNA polyadenylation [GO:0006378]; mRNA splicing, via spliceosome [GO:0000398]; pre-mRNA cleavage required for polyadenylation [GO:0098789]; termination of RNA polymerase II transcription [GO:0006369]; tRNA splicing, via endonucleolytic cleavage and ligation [GO:0006388]	mRNA cleavage and polyadenylation specificity factor complex [GO:0005847]; nucleoplasm [GO:0005654]; nucleus [GO:0005634]	enzyme binding [GO:0019899]; mRNA 3'-UTR AU-rich region binding [GO:0035925]	NA	54
856	Q12769;G3V198;E9PR16;E9PSI3	Sa1-IAA	0.36586	0.35528	1.02978	7	0.337375	0.790424	NA	0.5	0	Q12769	Nuclear pore complex protein Nup160	NUP160	intracellular transport of virus [GO:0075733]; mRNA export from nucleus [GO:0006406]; nephron development [GO:0072006]; protein sumoylation [GO:0016925]; regulation of cellular response to heat [GO:1900034]; regulation of gene silencing by miRNA [GO:0060964]; regulation of glycolytic process [GO:0006110]; tRNA export from nucleus [GO:0006409]; viral process [GO:0016032]; viral transcription [GO:0…	cytosol [GO:0005829]; host cell [GO:0043657]; nuclear envelope [GO:0005635]; nuclear pore [GO:0005643]; nuclear pore outer ring [GO:0031080]	structural constituent of nuclear pore [GO:0017056]	NA	26
857	Q12788;J3KNP2;A0JLS5;A0A087WYP7;H3BN88	Sa1-IAA	-0.388473	0.401545	-0.967446	7	0.36555	0.792452	NA	0.496599	0	Q12788	Transducin beta-like protein 3	TBL3	endonucleolytic cleavage in 5'-ETS of tricistronic rRNA transcript (SSU-rRNA, 5.8S rRNA, LSU-rRNA) [GO:0000480]; endonucleolytic cleavage to generate mature 5'-end of SSU-rRNA from (SSU-rRNA, 5.8S rRNA, LSU-rRNA) [GO:0000472]; rRNA processing [GO:0006364]	90S preribosome [GO:0030686]; nucleolus [GO:0005730]; nucleoplasm [GO:0005654]; small-subunit processome [GO:0032040]	RNA binding [GO:0003723]; U3 snoRNA binding [GO:0034511]	NA	42
858	Q12797;B8Y0L3;A0A087WW51;E5RHK2;A0A087WUJ2;Q6PJH4;E5RG56;B3GQE5;E5RHJ2;E5RG29;B7ZM96;B4DQ07;A8K721;G3XAN5	Sa1-IAA	-0.143975	0.446915	-0.322154	7	0.756744	0.941025	NA	0.492063	0	Q12797	Aspartyl/asparaginyl beta-hydroxylase	ASPH	activation of cysteine-type endopeptidase activity [GO:0097202]; activation of store-operated calcium channel activity [GO:0032237]; calcium ion homeostasis [GO:0055074]; calcium ion transmembrane transport [GO:0070588]; cellular response to calcium ion [GO:0071277]; detection of calcium ion [GO:0005513]; face morphogenesis [GO:0060325]; ion transmembrane transport [GO:0034220]; limb morphogenesi…	calcium channel complex [GO:0034704]; cortical endoplasmic reticulum [GO:0032541]; endoplasmic reticulum [GO:0005783]; endoplasmic reticulum membrane [GO:0005789]; integral component of endoplasmic reticulum membrane [GO:0030176]; integral component of membrane [GO:0016021]; junctional sarcoplasmic reticulum membrane [GO:0014701]; plasma membrane [GO:0005886]; sarcoplasmic reticulum lumen [GO:003…	calcium ion binding [GO:0005509]; electron transfer activity [GO:0009055]; ion channel binding [GO:0044325]; peptide-aspartate beta-dioxygenase activity [GO:0004597]; peptidyl-aspartic acid 3-dioxygenase activity [GO:0062101]; structural constituent of muscle [GO:0008307]; structural molecule activity [GO:0005198]	NA	14
859	Q12830;A0A2R8Y7Q1;E7ETD6;E9PE19;F5GXF5;A0A0A0MR81;B4DDK2;B4DM40;J3QQK4;B4DJV8;F5H176;J3QQQ8;J3KSK9;Q86TN2;Q9H5E0;J3KSY0	Sa1-IAA	-0.011894	0.315155	-0.03774	7	0.970949	0.996403	NA	0.453668	0	Q12830	Nucleosome-remodeling factor subunit BPTF	BPTF	anterior/posterior pattern specification [GO:0009952]; brain development [GO:0007420]; chromatin remodeling [GO:0006338]; embryonic placenta development [GO:0001892]; endoderm development [GO:0007492]; negative regulation of transcription by RNA polymerase II [GO:0000122]; nucleosome mobilization [GO:0042766]; positive regulation of transcription by RNA polymerase II [GO:0045944]; regulation of t…	cytoplasm [GO:0005737]; extracellular exosome [GO:0070062]; nuclear chromatin [GO:0000790]; nucleoplasm [GO:0005654]; nucleus [GO:0005634]; NURF complex [GO:0016589]	metal ion binding [GO:0046872]; methylated histone binding [GO:0035064]; RNA polymerase II cis-regulatory region sequence-specific DNA binding [GO:0000978]; sequence-specific DNA binding [GO:0043565]; transcription factor binding [GO:0008134]	NA	32
860	Q12872;Q59H38;Q8IV81;F5H1A5;H0YFR9;B4DHK4;A5PLM7	Sa1-IAA	-0.489525	0.327538	-1.49456	2	0.273639	0.782591	NA	0.714286	0	Q12872	Splicing factor, suppressor of white-apricot homolog	SFSWAP;SFRS8	alternative mRNA splicing, via spliceosome [GO:0000380]; mRNA 5'-splice site recognition [GO:0000395]; negative regulation of mRNA splicing, via spliceosome [GO:0048025]	nucleus [GO:0005634]	RNA binding [GO:0003723]	NA	35
861	Q12873;B4DLC6;B4DKV1;Q2TAZ1;B3KWV4;K7EMC0	Sa1-IAA	-0.43595	0.525235	-0.83001	4	0.453198	0.834038	NA	0.571429	0	Q12873	Chromodomain-helicase-DNA-binding protein 3	CHD3	ATP-dependent chromatin remodeling [GO:0043044]; centrosome cycle [GO:0007098]; chromatin assembly or disassembly [GO:0006333]; negative regulation of transcription by RNA polymerase II [GO:0000122]; regulation of signal transduction by p53 class mediator [GO:1901796]; regulation of transcription, DNA-templated [GO:0006355]; regulation of transcription by RNA polymerase II [GO:0006357]; spindle o…	centriolar satellite [GO:0034451]; centrosome [GO:0005813]; cytoplasm [GO:0005737]; nucleolus [GO:0005730]; nucleoplasm [GO:0005654]; nucleus [GO:0005634]; NuRD complex [GO:0016581]; PML body [GO:0016605]	ATPase activity [GO:0016887]; ATP binding [GO:0005524]; DNA binding [GO:0003677]; DNA helicase activity [GO:0003678]; double-stranded DNA helicase activity [GO:0036121]; helicase activity [GO:0004386]; nucleosome-dependent ATPase activity [GO:0070615]; RNA binding [GO:0003723]; transcription regulatory region sequence-specific DNA binding [GO:0000976]; zinc ion binding [GO:0008270]	NA	56
862	Q12888;A6NNK5;B7Z3E7;A8KA50;B3KVT9;C9JXV0;H7BZY0;H7C3N7;M0R142;H7C495;H7C151	Sa1-IAA	0.051911	0.375038	0.138415	7	0.89381	0.984803	NA	0.474286	0	Q12888	Tumor suppressor p53-binding protein 1	TP53BP1	cellular response to DNA damage stimulus [GO:0006974]; cellular response to X-ray [GO:0071481]; DNA damage checkpoint [GO:0000077]; double-strand break repair via nonhomologous end joining [GO:0006303]; negative regulation of double-strand break repair via homologous recombination [GO:2000042]; positive regulation of DNA-binding transcription factor activity [GO:0051091]; positive regulation of i…	condensed chromosome kinetochore [GO:0000777]; cytoplasm [GO:0005737]; DNA repair complex [GO:1990391]; nuclear body [GO:0016604]; nuclear chromosome, telomeric region [GO:0000784]; nucleoplasm [GO:0005654]; nucleus [GO:0005634]; replication fork [GO:0005657]; site of double-strand break [GO:0035861]	damaged DNA binding [GO:0003684]; histone binding [GO:0042393]; methylated histone binding [GO:0035064]; p53 binding [GO:0002039]; RNA polymerase II activating transcription factor binding [GO:0001102]; telomeric DNA binding [GO:0042162]; transcription coregulator activity [GO:0003712]; ubiquitin modification-dependent histone binding [GO:0061649]	NA	41
863	Q12996;E9PLP8;E9PJ06;B4DMA4	Sa1-IAA	Inf	NA	NA	NA	NA	0	oneConditionMissing	0.714286	0	Q12996	Cleavage stimulation factor subunit 3	CSTF3	mRNA 3'-end processing [GO:0031124]; mRNA cleavage [GO:0006379]; mRNA polyadenylation [GO:0006378]; mRNA splicing, via spliceosome [GO:0000398]; RNA 3'-end processing [GO:0031123]; termination of RNA polymerase II transcription [GO:0006369]	nucleoplasm [GO:0005654]; nucleus [GO:0005634]	mRNA binding [GO:0003729]; RNA binding [GO:0003723]	NA	32
864	Q13045;Q59H95;B4DIX0;J3KS54;J3KS39;B4DNA8	Sa1-IAA	-0.0709852	0.314596	-0.225639	1	0.85872	0.970933	NA	0.642857	0	Q13045	Protein flightless-1 homolog	FLII	actin filament severing [GO:0051014]; actin polymerization or depolymerization [GO:0008154]; barbed-end actin filament capping [GO:0051016]; multicellular organism development [GO:0007275]; myofibril assembly [GO:0030239]	actin cytoskeleton [GO:0015629]; brush border [GO:0005903]; centriolar satellite [GO:0034451]; cytoplasm [GO:0005737]; cytosol [GO:0005829]; focal adhesion [GO:0005925]; nucleoplasm [GO:0005654]; nucleus [GO:0005634]	actin binding [GO:0003779]; actin filament binding [GO:0051015]; phosphatidylinositol-4,5-bisphosphate binding [GO:0005546]	NA	36
865	Q13129;Q59GL0	Sa1-IAA	-1.21069	0.584759	-2.07041	3	0.130191	0.658061	NA	0.571429	0	Q13129	Zinc finger protein Rlf	RLF	chromosome organization [GO:0051276]; DNA integration [GO:0015074]; histone H3-K4 monomethylation [GO:0097692]; positive regulation of transcription, DNA-templated [GO:0045893]; positive regulation of transcription by RNA polymerase II [GO:0045944]; regulation of DNA methylation [GO:0044030]; regulation of transcription, DNA-templated [GO:0006355]; regulation of transcription by RNA polymerase II…	nucleus [GO:0005634]	DNA binding [GO:0003677]; DNA-binding transcription activator activity, RNA polymerase II-specific [GO:0001228]; zinc ion binding [GO:0008270]	NA	10
866	Q13151	Sa1-IAA	-0.535167	1.43678	-0.372477	2	0.745305	0.941025	NA	0.642857	0	Q13151	Heterogeneous nuclear ribonucleoprotein A0	HNRNPA0	3'-UTR-mediated mRNA stabilization [GO:0070935]; inflammatory response [GO:0006954]; mRNA processing [GO:0006397]; mRNA splicing, via spliceosome [GO:0000398]; response to lipopolysaccharide [GO:0032496]; RNA metabolic process [GO:0016070]	nucleoplasm [GO:0005654]; nucleus [GO:0005634]	mRNA 3'-UTR AU-rich region binding [GO:0035925]; mRNA binding [GO:0003729]; protein kinase binding [GO:0019901]; RNA binding [GO:0003723]	NA	164
867	Q13206;B4DKX3;E9PIF2;Q59EC7;Q86VR6;A0A3B3ISR7	Sa1-IAA	-0.826751	0.329213	-2.5113	7	0.0403204	0.589366	NA	0.5625	0	Q13206	Probable ATP-dependent RNA helicase DDX10	DDX10	anterior head development [GO:0097065]; rRNA processing [GO:0006364]	nucleus [GO:0005634]	ATP binding [GO:0005524]; RNA binding [GO:0003723]; RNA helicase activity [GO:0003724]	NA	30
868	Q13427;Q2NKQ6;E9PG73;Q32LZ0;C9JM79;C9JN15;Q6P432	Sa1-IAA	0.389375	0.720021	0.540783	5	0.611869	0.887383	NA	0.6	0	Q13427	Peptidyl-prolyl cis-trans isomerase G	PPIG	protein folding [GO:0006457]; protein peptidyl-prolyl isomerization [GO:0000413]; RNA splicing [GO:0008380]	cytoplasm [GO:0005737]; cytosol [GO:0005829]; intracellular membrane-bounded organelle [GO:0043231]; nuclear matrix [GO:0016363]; nuclear speck [GO:0016607]; nucleoplasm [GO:0005654]; nucleus [GO:0005634]	cyclosporin A binding [GO:0016018]; peptidyl-prolyl cis-trans isomerase activity [GO:0003755]; RNA binding [GO:0003723]	NA	38
869	Q13428;Q59FZ2	Sa1-IAA	-0.778212	NA	NA	0	NA	NA	NA	0.714286	0	Q13428	Treacle protein	TCOF1	neural crest cell development [GO:0014032]; neural crest formation [GO:0014029]; nucleolar large rRNA transcription by RNA polymerase I [GO:0042790]; regulation of translation [GO:0006417]; skeletal system development [GO:0001501]	cytosol [GO:0005829]; fibrillar center [GO:0001650]; nucleolus [GO:0005730]; nucleoplasm [GO:0005654]	protein heterodimerization activity [GO:0046982]; RNA binding [GO:0003723]; RNA polymerase I core binding [GO:0001042]; scaffold protein binding [GO:0097110]; transporter activity [GO:0005215]	NA	103
870	Q13435;E9PPJ0;Q7Z3K9;E9PJ04;H0YCG1;E9PJT3;H0YEX5;E9PIL8	Sa1-IAA	-0.0452584	0.307884	-0.146998	7	0.887277	0.984548	NA	0.579832	0	Q13435	Splicing factor 3B subunit 2	SF3B2;DKFZp781L0540	mRNA processing [GO:0006397]; mRNA splicing, via spliceosome [GO:0000398]; RNA splicing [GO:0008380]; viral process [GO:0016032]	catalytic step 2 spliceosome [GO:0071013]; nuclear speck [GO:0016607]; nucleoplasm [GO:0005654]; nucleus [GO:0005634]; precatalytic spliceosome [GO:0071011]; spliceosomal complex [GO:0005681]; U12-type spliceosomal complex [GO:0005689]; U2 snRNP [GO:0005686]; U2-type precatalytic spliceosome [GO:0071005]; U2-type spliceosomal complex [GO:0005684]	RNA binding [GO:0003723]	NA	134
871	Q13472;A8K398;B4DSJ0	Sa1-IAA	NA	NA	NA	NA	NA	NA	NA	0.714286	0	Q13472	DNA topoisomerase 3-alpha	TOP3A	chromosome separation [GO:0051304]; DNA replication [GO:0006260]; DNA topological change [GO:0006265]; meiotic cell cycle [GO:0051321]; mitochondrial DNA metabolic process [GO:0032042]; regulation of signal transduction by p53 class mediator [GO:1901796]	chromosome [GO:0005694]; mitochondrial matrix [GO:0005759]; nucleoplasm [GO:0005654]; nucleus [GO:0005634]; PML body [GO:0016605]	DNA binding [GO:0003677]; DNA topoisomerase activity [GO:0003916]; DNA topoisomerase type I (single strand cut, ATP-independent) activity [GO:0003917]; single-stranded DNA binding [GO:0003697]; zinc ion binding [GO:0008270]	NA	2
872	Q13601;B4DMS5	Sa1-IAA	-0.617202	0.665543	-0.927366	7	0.384597	0.812707	NA	0.571429	0	Q13601	KRR1 small subunit processome component homolog	KRR1	rRNA processing [GO:0006364]	cytoplasm [GO:0005737]; intercellular bridge [GO:0045171]; membrane [GO:0016020]; nucleolus [GO:0005730]; nucleoplasm [GO:0005654]; small-subunit processome [GO:0032040]	RNA binding [GO:0003723]	NA	26
873	Q13619;B4DKT2;B2RBV7;A0A0A0MR50;A0A087WWN2	Sa1-IAA	#NAME?	NA	NA	NA	NA	0	oneConditionMissing	0.714286	0	Q13619	Cullin-4A	CUL4A	cellular response to DNA damage stimulus [GO:0006974]; DNA damage response, detection of DNA damage [GO:0042769]; G1/S transition of mitotic cell cycle [GO:0000082]; global genome nucleotide-excision repair [GO:0070911]; hemopoiesis [GO:0030097]; intrinsic apoptotic signaling pathway [GO:0097193]; in utero embryonic development [GO:0001701]; negative regulation of granulocyte differentiation [GO:…	Cul4A-RING E3 ubiquitin ligase complex [GO:0031464]; Cul4-RING E3 ubiquitin ligase complex [GO:0080008]; cullin-RING ubiquitin ligase complex [GO:0031461]; nucleoplasm [GO:0005654]; SCF ubiquitin ligase complex [GO:0019005]	ubiquitin protein ligase binding [GO:0031625]; ubiquitin-protein transferase activity [GO:0004842]	NA	46
874	Q13895;F8WBL2;H7BY94	Sa1-IAA	-0.51976	0.465036	-1.11768	4	0.326299	0.783886	NA	0.6	0	Q13895	Bystin	BYSL	cell population proliferation [GO:0008283]; maturation of SSU-rRNA from tricistronic rRNA transcript (SSU-rRNA, 5.8S rRNA, LSU-rRNA) [GO:0000462]; regulation of protein localization to nucleolus [GO:1904749]; ribosome biogenesis [GO:0042254]; rRNA processing [GO:0006364]; trophectodermal cell differentiation [GO:0001829]	apical part of cell [GO:0045177]; cytoplasm [GO:0005737]; cytosol [GO:0005829]; intracellular membrane-bounded organelle [GO:0043231]; membrane [GO:0016020]; nucleolus [GO:0005730]; nucleoplasm [GO:0005654]; nucleus [GO:0005634]; preribosome, small subunit precursor [GO:0030688]	RNA binding [GO:0003723]; snoRNA binding [GO:0030515]	NA	56
875	Q14126;J3KSI6	Sa1-IAA	-0.333095	0.616128	-0.540626	7	0.605532	0.883465	NA	0.539683	0	Q14126	Desmoglein-2	DSG2	bundle of His cell-Purkinje myocyte adhesion involved in cell communication [GO:0086073]; cell adhesion [GO:0007155]; cell-cell adhesion [GO:0098609]; cornification [GO:0070268]; desmosome organization [GO:0002934]; homophilic cell adhesion via plasma membrane adhesion molecules [GO:0007156]; keratinization [GO:0031424]; maternal process involved in female pregnancy [GO:0060135]; Purkinje myocyte…	apical plasma membrane [GO:0016324]; cell-cell junction [GO:0005911]; cell junction [GO:0030054]; cell surface [GO:0009986]; cornified envelope [GO:0001533]; desmosome [GO:0030057]; extracellular exosome [GO:0070062]; integral component of membrane [GO:0016021]; intercalated disc [GO:0014704]; intracellular membrane-bounded organelle [GO:0043231]; lateral plasma membrane [GO:0016328]; plasma memb…	calcium ion binding [GO:0005509]; cell adhesion molecule binding [GO:0050839]; cell adhesive protein binding involved in bundle of His cell-Purkinje myocyte communication [GO:0086083]	NA	37
876	Q14157;B4DYY5;F8W726;B4DZJ6;Q5VU77;Q5VU78;Q5VU81;Q5VU80;Q5VU79;H0Y5H6;H7C2T8	Sa1-IAA	-0.238898	0.337271	-0.708327	7	0.501642	0.8608	NA	0.577381	0	Q14157	Ubiquitin-associated protein 2-like	UBAP2L	binding of sperm to zona pellucida [GO:0007339]; hematopoietic stem cell homeostasis [GO:0061484]; stress granule assembly [GO:0034063]	cytoplasm [GO:0005737]; cytoplasmic stress granule [GO:0010494]; nucleus [GO:0005634]; PcG protein complex [GO:0031519]	RNA binding [GO:0003723]	NA	129
877	Q14204;A0A2R8Y706;A0A2R8Y5T0;A0A2R8Y542;A0A2R8YFZ7;A0A2R8Y6I5;A0A2R8YGC7;A0A2R8Y6H2;Q92862;Q6P2H7;H0YJ21	Sa1-IAA	-0.17808	0.296095	-0.601429	4	0.579977	0.877134	NA	0.535714	0	Q14204	Cytoplasmic dynein 1 heavy chain 1	DYNC1H1	antigen processing and presentation of exogenous peptide antigen via MHC class II [GO:0019886]; cell division [GO:0051301]; ciliary basal body-plasma membrane docking [GO:0097711]; cytoplasmic microtubule organization [GO:0031122]; cytoplasmic mRNA processing body assembly [GO:0033962]; endoplasmic reticulum to Golgi vesicle-mediated transport [GO:0006888]; establishment of spindle localization […	axon cytoplasm [GO:1904115]; azurophil granule lumen [GO:0035578]; cell cortex [GO:0005938]; centrosome [GO:0005813]; cytoplasmic dynein complex [GO:0005868]; cytoplasmic microtubule [GO:0005881]; cytosol [GO:0005829]; dynein complex [GO:0030286]; extracellular exosome [GO:0070062]; extracellular region [GO:0005576]; filopodium [GO:0030175]; membrane [GO:0016020]; microtubule [GO:0005874]	ATP binding [GO:0005524]; dynein intermediate chain binding [GO:0045505]; dynein light intermediate chain binding [GO:0051959]; microtubule motor activity [GO:0003777]; RNA binding [GO:0003723]	NA	131
878	Q14258;A0A3B3IUA7	Sa1-IAA	Inf	NA	NA	NA	NA	0	oneConditionMissing	0.571429	0	Q14258	E3 ubiquitin/ISG15 ligase TRIM25	TRIM25	cellular response to leukemia inhibitory factor [GO:1990830]; defense response to virus [GO:0051607]; innate immune response [GO:0045087]; interferon-gamma-mediated signaling pathway [GO:0060333]; negative regulation of type I interferon production [GO:0032480]; negative regulation of viral entry into host cell [GO:0046597]; negative regulation of viral release from host cell [GO:1902187]; positi…	cytoplasmic stress granule [GO:0010494]; cytosol [GO:0005829]; nuclear body [GO:0016604]; nucleoplasm [GO:0005654]	cadherin binding [GO:0045296]; ligase activity [GO:0016874]; metal ion binding [GO:0046872]; RIG-I binding [GO:0039552]; RNA binding [GO:0003723]; ubiquitin protein ligase activity [GO:0061630]	NA	29
879	Q14315;Q59H94	Sa1-IAA	-0.473328	0.352575	-1.34249	1	0.407576	0.82078	NA	0.761905	0	Q14315	Filamin-C	FLNC	cell junction assembly [GO:0034329]; muscle fiber development [GO:0048747]	costamere [GO:0043034]; cytoplasm [GO:0005737]; cytoskeleton [GO:0005856]; cytosol [GO:0005829]; focal adhesion [GO:0005925]; plasma membrane [GO:0005886]; sarcolemma [GO:0042383]; sarcoplasm [GO:0016528]; Z disc [GO:0030018]	actin binding [GO:0003779]; ankyrin binding [GO:0030506]; cytoskeletal protein binding [GO:0008092]; identical protein binding [GO:0042802]	NA	147
880	Q14444;B4DSF8;E9PLA9;G3V153;B3KXU8	Sa1-IAA	-0.332583	0.323023	-1.0296	5	0.350405	0.790424	NA	0.55102	0	Q14444	Caprin-1	CAPRIN1	negative regulation of translation [GO:0017148]; positive regulation of dendrite morphogenesis [GO:0050775]; positive regulation of dendritic spine morphogenesis [GO:0061003]	cell leading edge [GO:0031252]; cytoplasm [GO:0005737]; cytoplasmic stress granule [GO:0010494]; cytosol [GO:0005829]; dendrite [GO:0030425]; lamellipodium [GO:0030027]; membrane [GO:0016020]; P-body [GO:0000932]	RNA binding [GO:0003723]	NA	120
881	Q14566;Q4ZG57;B4DRF6;Q53T61;B4E0N7	Sa1-IAA	0.382624	1.13646	0.33668	3	0.758534	0.941025	NA	0.619048	0	Q14566	DNA replication licensing factor MCM6	MCM6	DNA replication [GO:0006260]; DNA replication initiation [GO:0006270]; DNA unwinding involved in DNA replication [GO:0006268]; double-strand break repair via break-induced replication [GO:0000727]; G1/S transition of mitotic cell cycle [GO:0000082]; mitotic DNA replication [GO:1902969]; pre-replicative complex assembly involved in nuclear cell cycle DNA replication [GO:0006267]	MCM complex [GO:0042555]; nuclear chromosome, telomeric region [GO:0000784]; nucleoplasm [GO:0005654]; nucleus [GO:0005634]	ATP binding [GO:0005524]; DNA helicase activity [GO:0003678]; DNA replication origin binding [GO:0003688]; identical protein binding [GO:0042802]; single-stranded DNA binding [GO:0003697]	NA	101
882	Q14573;Q59ES2;A6H8K3	Sa1-IAA	-0.226782	0.357844	-0.633745	6	0.549628	0.868716	NA	0.555556	0	Q14573	Inositol 1,4,5-trisphosphate receptor type 3	ITPR3	calcium ion transport into cytosol [GO:0060402]; G protein-coupled receptor signaling pathway [GO:0007186]; long-term synaptic potentiation [GO:0060291]; memory [GO:0007613]; platelet activation [GO:0030168]; positive regulation of cytosolic calcium ion concentration [GO:0007204]; regulation of cardiac conduction [GO:1903779]; regulation of insulin secretion [GO:0050796]; release of sequestered c…	apical part of cell [GO:0045177]; brush border [GO:0005903]; cytoplasm [GO:0005737]; cytoplasmic vesicle membrane [GO:0030659]; endoplasmic reticulum [GO:0005783]; endoplasmic reticulum membrane [GO:0005789]; integral component of plasma membrane [GO:0005887]; membrane [GO:0016020]; myelin sheath [GO:0043209]; neuronal cell body [GO:0043025]; nuclear outer membrane [GO:0005640]; nucleolus [GO:000…	calcium ion binding [GO:0005509]; calcium-release channel activity [GO:0015278]; inositol 1,3,4,5 tetrakisphosphate binding [GO:0043533]; inositol 1,4,5 trisphosphate binding [GO:0070679]; inositol 1,4,5-trisphosphate-sensitive calcium-release channel activity [GO:0005220]; inositol hexakisphosphate binding [GO:0000822]; phosphatidylinositol binding [GO:0035091]	NA	15
883	Q14669;H7C2Y1;Q57Z94	Sa1-IAA	0.320467	0.329264	0.973282	7	0.362837	0.792452	NA	0.631579	0	Q14669	E3 ubiquitin-protein ligase TRIP12	TRIP12	cellular response to DNA damage stimulus [GO:0006974]; DNA repair [GO:0006281]; negative regulation of double-strand break repair [GO:2000780]; negative regulation of histone H2A K63-linked ubiquitination [GO:1901315]; protein polyubiquitination [GO:0000209]; regulation of double-strand break repair [GO:2000779]; regulation of embryonic development [GO:0045995]; ubiquitin-dependent protein catabo…	cytosol [GO:0005829]; nuclear speck [GO:0016607]; nucleoplasm [GO:0005654]; nucleus [GO:0005634]	thyroid hormone receptor binding [GO:0046966]; ubiquitin protein ligase activity [GO:0061630]	NA	29
884	Q14671;E9PR38;H0YEH2;Q5T1Z4;Q5T1Z8;B4DU15;H0YDK8;B3KU37;D5HR47;D5HR46;E9PMX1;E9PM68;E9PL65;H0YDC5;H0YC97	Sa1-IAA	-0.144604	0.808602	-0.178832	3	0.869465	0.973302	NA	0.714286	0	Q14671	Pumilio homolog 1	PUM1	adult locomotory behavior [GO:0008344]; mRNA destabilization [GO:0061157]; positive regulation of gene silencing by miRNA [GO:2000637]; positive regulation of RIG-I signaling pathway [GO:1900246]; posttranscriptional gene silencing [GO:0016441]; posttranscriptional regulation of gene expression [GO:0010608]; production of miRNAs involved in gene silencing by miRNA [GO:0035196]; regulation of cell…	cytoplasm [GO:0005737]; cytoplasmic stress granule [GO:0010494]; cytosol [GO:0005829]; nucleoplasm [GO:0005654]; P-body [GO:0000932]	miRNA binding [GO:0035198]; mRNA 3'-UTR binding [GO:0003730]; mRNA binding [GO:0003729]; RNA binding [GO:0003723]	NA	24
885	Q14684;Q6PJM8	Sa1-IAA	-0.464598	0.375955	-1.23578	7	0.256399	0.761092	NA	0.552381	0	Q14684	Ribosomal RNA processing protein 1 homolog B	RRP1B	apoptotic process [GO:0006915]; cellular response to virus [GO:0098586]; mRNA processing [GO:0006397]; negative regulation of GTPase activity [GO:0034260]; negative regulation of phosphatase activity [GO:0010923]; positive regulation by host of viral transcription [GO:0043923]; positive regulation of apoptotic process [GO:0043065]; positive regulation of transcription by RNA polymerase II [GO:004…	cytosol [GO:0005829]; euchromatin [GO:0000791]; granular component [GO:0001652]; heterochromatin [GO:0000792]; nucleolus [GO:0005730]; nucleoplasm [GO:0005654]; nucleus [GO:0005634]; preribosome, large subunit precursor [GO:0030687]; preribosome, small subunit precursor [GO:0030688]	RNA binding [GO:0003723]; transcription coactivator activity [GO:0003713]	NA	62
886	Q14692	Sa1-IAA	-0.821562	0.428595	-1.91688	7	0.0967737	0.618718	NA	0.589286	0	Q14692	Ribosome biogenesis protein BMS1 homolog	BMS1	endonucleolytic cleavage of tricistronic rRNA transcript (SSU-rRNA, 5.8S rRNA, LSU-rRNA) [GO:0000479]; maturation of SSU-rRNA from tricistronic rRNA transcript (SSU-rRNA, 5.8S rRNA, LSU-rRNA) [GO:0000462]; rRNA processing [GO:0006364]	90S preribosome [GO:0030686]; nucleolus [GO:0005730]; nucleoplasm [GO:0005654]	ATP binding [GO:0005524]; GTPase activity [GO:0003924]; GTP binding [GO:0005525]; RNA binding [GO:0003723]; U3 snoRNA binding [GO:0034511]	NA	53
887	Q14694;Q6P2I0;J3KT19;H3BQP1;H3BQC6;B4DDR4;H3BNS8;H3BNA1;H3BVF1	Sa1-IAA	-0.0895229	0.644579	-0.138886	6	0.894085	0.984803	NA	0.642857	0	Q14694	Ubiquitin carboxyl-terminal hydrolase 10	USP10	autophagy [GO:0006914]; cellular response to DNA damage stimulus [GO:0006974]; cellular response to interleukin-1 [GO:0071347]; DNA damage response, signal transduction by p53 class mediator [GO:0030330]; negative regulation of I-kappaB kinase/NF-kappaB signaling [GO:0043124]; protein deubiquitination [GO:0016579]; regulation of autophagy [GO:0010506]; translesion synthesis [GO:0019985]; ubiquiti…	cytoplasm [GO:0005737]; cytosol [GO:0005829]; early endosome [GO:0005769]; nucleoplasm [GO:0005654]; nucleus [GO:0005634]; protein-containing complex [GO:0032991]	cysteine-type endopeptidase activity [GO:0004197]; ion channel binding [GO:0044325]; p53 binding [GO:0002039]; RNA binding [GO:0003723]; thiol-dependent ubiquitin-specific protease activity [GO:0004843]; thiol-dependent ubiquitinyl hydrolase activity [GO:0036459]	NA	35
888	Q14781	Sa1-IAA	-1.05126	0.396926	-2.6485	7	0.0330133	0.58802	NA	0.6	0	Q14781	Chromobox protein homolog 2	CBX2	cell differentiation [GO:0030154]; chromatin organization [GO:0006325]; development of primary sexual characteristics [GO:0045137]; negative regulation of transcription by RNA polymerase II [GO:0000122]	euchromatin [GO:0000791]; heterochromatin [GO:0000792]; nucleoplasm [GO:0005654]; nucleus [GO:0005634]; PcG protein complex [GO:0031519]; PRC1 complex [GO:0035102]	chromatin binding [GO:0003682]; DNA binding [GO:0003677]; methylated histone binding [GO:0035064]	NA	6
889	Q14865	Sa1-IAA	-0.917593	0.728313	-1.25989	0	NA	NA	NA	0.571429	0	Q14865	AT-rich interactive domain-containing protein 5B	ARID5B	adipose tissue development [GO:0060612]; adrenal gland development [GO:0030325]; cell development [GO:0048468]; cellular response to leukemia inhibitory factor [GO:1990830]; face morphogenesis [GO:0060325]; fat cell differentiation [GO:0045444]; fat pad development [GO:0060613]; female gonad development [GO:0008585]; fibroblast migration [GO:0010761]; kidney development [GO:0001822]; liver develo…	nucleoplasm [GO:0005654]; nucleus [GO:0005634]	DNA binding [GO:0003677]; DNA-binding transcription repressor activity, RNA polymerase II-specific [GO:0001227]; RNA polymerase II transcription regulatory region sequence-specific DNA binding [GO:0000977]; transcription coactivator activity [GO:0003713]; transcription regulatory region sequence-specific DNA binding [GO:0000976]	NA	2
890	Q14966;A8K583;D6W5H1;B4DF54;B4E187;Q57Z90;Q6ZQV0;A0A096LPI0;A0A096LPB4;C9JWN0;A0A096LNR2;A0A096LNX0;A0A096LNS4;A0A096LNQ0;A0A096LPK8	Sa1-IAA	-0.290537	0.184588	-1.57397	7	0.159494	0.689323	NA	0.5625	0	Q14966	Zinc finger protein 638	ZNF638	RNA splicing [GO:0008380]	cytoplasm [GO:0005737]; intracellular membrane-bounded organelle [GO:0043231]; nuclear speck [GO:0016607]; nucleoplasm [GO:0005654]; nucleus [GO:0005634]	double-stranded DNA binding [GO:0003690]; RNA binding [GO:0003723]; zinc ion binding [GO:0008270]	NA	65
891	Q14978;A0A0A0MRM9;B2RAU8;Q96J17;S4R349;S4R3C2;S4R402;S4R341	Sa1-IAA	-0.738128	0.343814	-2.14688	7	0.0689304	0.618718	NA	0.518519	0	Q14978	Nucleolar and coiled-body phosphoprotein 1	NOLC1	box H/ACA snoRNA metabolic process [GO:0033979]; mitotic cell cycle [GO:0000278]; neural crest cell development [GO:0014032]; neural crest formation [GO:0014029]; nucleolus organization [GO:0007000]; positive regulation of cell population proliferation [GO:0008284]; positive regulation of transcription, DNA-templated [GO:0045893]; regulation of protein import into nucleus [GO:0042306]; regulation…	box C/D snoRNP complex [GO:0031428]; box H/ACA snoRNP complex [GO:0031429]; Cajal body [GO:0015030]; cytoplasm [GO:0005737]; fibrillar center [GO:0001650]; nucleolus [GO:0005730]; nucleoplasm [GO:0005654]	ATP binding [GO:0005524]; box C/D snoRNA binding [GO:0034512]; box C/D snoRNP complex binding [GO:0062064]; box H/ACA snoRNA binding [GO:0034513]; box H/ACA snoRNP complex binding [GO:0062065]; DNA binding [GO:0003677]; DNA-binding transcription factor activity [GO:0003700]; GTP binding [GO:0005525]; nuclear localization sequence binding [GO:0008139]; protein domain specific binding [GO:0019904];…	NA	120
892	Q15029;B3KX19;Q6IBM8;A8KAP3;Q8IXJ3;B4DZB1;B3KWY2;K7EP67;K7EJ74;K7EIV5;K7EIT3	Sa1-IAA	-0.140505	0.216604	-0.648671	7	0.537242	0.868716	NA	0.441558	0	Q15029	116 kDa U5 small nuclear ribonucleoprotein component	EFTUD2;U5-116KD;SNRP116	cellular response to drug [GO:0035690]; mRNA splicing, via spliceosome [GO:0000398]; response to cocaine [GO:0042220]	Cajal body [GO:0015030]; catalytic step 2 spliceosome [GO:0071013]; cytosol [GO:0005829]; intracellular membrane-bounded organelle [GO:0043231]; membrane [GO:0016020]; nuclear speck [GO:0016607]; nucleoplasm [GO:0005654]; nucleus [GO:0005634]; ribonucleoprotein complex [GO:1990904]; U2-type catalytic step 2 spliceosome [GO:0071007]; U2-type precatalytic spliceosome [GO:0071005]; U4/U6 x U5 tri-sn…	GTPase activity [GO:0003924]; GTP binding [GO:0005525]; RNA binding [GO:0003723]; U5 snRNA binding [GO:0030623]	NA	162
893	Q15050	Sa1-IAA	-1.34328	0.439761	-3.05456	7	0.0184642	0.500978	NA	0.5625	0	Q15050	Ribosome biogenesis regulatory protein homolog	RRS1	endonucleolytic cleavage in ITS1 to separate SSU-rRNA from 5.8S rRNA and LSU-rRNA from tricistronic rRNA transcript (SSU-rRNA, 5.8S rRNA, LSU-rRNA) [GO:0000447]; hematopoietic progenitor cell differentiation [GO:0002244]; mitotic metaphase plate congression [GO:0007080]; protein localization to nucleolus [GO:1902570]; regulation of signal transduction by p53 class mediator [GO:1901796]; ribosomal…	condensed nuclear chromosome [GO:0000794]; endoplasmic reticulum [GO:0005783]; fibrillar center [GO:0001650]; nucleolus [GO:0005730]; nucleoplasm [GO:0005654]; preribosome, large subunit precursor [GO:0030687]	5S rRNA binding [GO:0008097]; RNA binding [GO:0003723]	NA	38
894	Q15061;C9IZK7;Q8TB67;C9JEE7	Sa1-IAA	-0.65154	0.370653	-1.75782	7	0.122191	0.649655	NA	0.464286	0	Q15061	WD repeat-containing protein 43	WDR43	positive regulation of rRNA processing [GO:2000234]; positive regulation of transcription by RNA polymerase I [GO:0045943]; regulation of stem cell population maintenance [GO:2000036]; regulation of transcription elongation from RNA polymerase II promoter [GO:0034243]; rRNA processing [GO:0006364]	chromatin [GO:0000785]; fibrillar center [GO:0001650]; nucleolus [GO:0005730]; nucleoplasm [GO:0005654]	RNA binding [GO:0003723]; RNA polymerase II complex binding [GO:0000993]; transcription elongation regulator activity [GO:0003711]	NA	27
[truncated: 7,062 more rows]

## Sheet: MSstats_Sample quant
Protein	Mock_R4	Mock_R1	Mock_R5	UTR_R1	UTR_R5	UTR_R2	SiCon_R4	SiCon_R1	SiCon_R5	SiSa1_R4	SiSa1_R1	SiSa1_R5	UTR_R4	IAA_R4	IAA_R1	IAA_R5
A0A024QYX7;B3KNZ4;B4DRU0;B4DVU3;B4E2Z6;B4DDN4;B4DVQ5;A1KYQ7;A0A024QYU9;Q99613;B5ME19	NA	NA	NA	21.6387	NA	23.0461	NA	NA	NA	22.0777	21.9726	NA	NA	NA	20.1744	21.4031
A0A024QYZ9;Q9P209	NA	NA	NA	20.8703	NA	NA	21.2737	NA	NA	NA	NA	NA	21.2848	NA	19.765	NA
A0A024QZC0;A0A024QZB7;A0A024QZ91;Q8WWM7;H3BUF6;H3BSK9;H3BUE3;H3BRB0;A0A0C4DGL7	NA	NA	NA	22.3561	21.5802	23.4851	22.2871	22.5065	20.4661	24.4598	23.8471	22.5716	NA	NA	23.1868	20.9665
[truncated: 1,325 more rows]
