# Supplementary material for: Cohesin-independent STAG proteins interact with RNA and R-loops and promote complex loading
Source: eLife. 2023 Apr 3;12:e79386. doi: 10.7554/eLife.79386 (PMC10238091; doi:10.7554/eLife.79386)
Supplement: Figure 5—figure supplement 1—source data 1. [file elife-79386-fig5-figsupp1-data1.xlsx]

## Sheet: Sheet1
Figure 5 - figure supplement 1 - source data 1. Table in a)
Dataset	SA2 e32 PSI	Reads across junction	SA1 e31 PSI	Reads across junction
ENCODE HCT	21.92	202.98	98.99	588
Zuo HCT	19.18	94.75	97.91	278.06
ENCODE HeLa	19.95	90.57	96.36	156.1
AVG	20.35		97.75
