# Supplementary material for: Cohesin-independent STAG proteins interact with RNA and R-loops and promote complex loading
Source: eLife. 2023 Apr 3;12:e79386. doi: 10.7554/eLife.79386 (PMC10238091; doi:10.7554/eLife.79386)
Supplement: Figure 5—figure supplement 1—source data 2. [file elife-79386-fig5-figsupp1-data2.xlsx]

## Sheet: Proteins in profile plots
Summarised protein signal (in red)
Protein	ProtName	GeneName	Control_C_1	Control_C_2	Control_C_3	Short_S_1	Short_S_2	Short_S_3	Long_L_1	Long_L_2	Long_L_3
O60216;Q9H4I0	Double-strand-break repair protein rad21 homolog	RAD21	NA	NA	NA	20.0921	20.8958	21.1479	20.2896	21.6707	21.324
P42212;CON__Q9U6Y5	Green fluorescent protein	GFP	14.3268	NA	NA	26.9331	25.6321	25.5337	26.7216	26.1041	26.0076
Q14683	Structural maintenance of chromosomes protein 1A	SMC1A	NA	NA	NA	21.4023	21.9697	22.2183	21.3318	22.472	22.1781
Q8N3U4-2	Cohesin subunit SA-2 (long)	STAG2	NA	NA	NA	NA	NA	NA	25.7058	25.463	24.738
Q8N3U4;Q9UJ98;Q8TBR4	Cohesin subunit SA-2 (short)	STAG2	NA	NA	NA	26.2229	25.3079	24.5955	22.9393	NA	NA
Q9UQE7	Structural maintenance of chromosomes protein 3	SMC3	NA	NA	NA	21.9221	22.232	22.4325	21.5416	22.8122	22.3288
Peptide signals (in grey)
PROTEIN	Lead_Prot	Prot_Name	Gene_Name	PEPTIDE	GROUP_ORIGINAL	SUBJECT_ORIGINAL	RUN	GROUP	SUBJECT	SUBJECT_NESTED	ABUNDANCE	originalRUN
O60216;Q9H4I0	O60216	Double-strand-break repair protein rad21 homolog	RAD21	DVIDEPIIEEPSRLQESVMEASR_3	Control	C_1	1	1	3	1.3	NA	QEP2_210813_AB_133
O60216;Q9H4I0	O60216	Double-strand-break repair protein rad21 homolog	RAD21	FYSFLVLK_2	Control	C_1	1	1	3	1.3	NA	QEP2_210813_AB_133
O60216;Q9H4I0	O60216	Double-strand-break repair protein rad21 homolog	RAD21	KQQAIELTQEEPYSDIIATPGPR_3	Control	C_1	1	1	3	1.3	NA	QEP2_210813_AB_133
O60216;Q9H4I0	O60216	Double-strand-break repair protein rad21 homolog	RAD21	LFSLPAQPLWNNR_2	Control	C_1	1	1	3	1.3	NA	QEP2_210813_AB_133
O60216;Q9H4I0	O60216	Double-strand-break repair protein rad21 homolog	RAD21	MAFRPGVVDLPEENR_3	Control	C_1	1	1	3	1.3	NA	QEP2_210813_AB_133
O60216;Q9H4I0	O60216	Double-strand-break repair protein rad21 homolog	RAD21	TGAESISLLELCR_2	Control	C_1	1	1	3	1.3	NA	QEP2_210813_AB_133
O60216;Q9H4I0	O60216	Double-strand-break repair protein rad21 homolog	RAD21	TNIDESAMPPPPPQGVK_2	Control	C_1	1	1	3	1.3	NA	QEP2_210813_AB_133
O60216;Q9H4I0	O60216	Double-strand-break repair protein rad21 homolog	RAD21	TNIDESAMPPPPPQGVKR_3	Control	C_1	1	1	3	1.3	NA	QEP2_210813_AB_133
O60216;Q9H4I0	O60216	Double-strand-break repair protein rad21 homolog	RAD21	TSGHLLLGVVR_2	Control	C_1	1	1	3	1.3	NA	QEP2_210813_AB_133
O60216;Q9H4I0	O60216	Double-strand-break repair protein rad21 homolog	RAD21	DVIDEPIIEEPSRLQESVMEASR_3	Control	C_2	2	1	4	1.4	NA	QEP2_210813_AB_137
O60216;Q9H4I0	O60216	Double-strand-break repair protein rad21 homolog	RAD21	FYSFLVLK_2	Control	C_2	2	1	4	1.4	NA	QEP2_210813_AB_137
O60216;Q9H4I0	O60216	Double-strand-break repair protein rad21 homolog	RAD21	KQQAIELTQEEPYSDIIATPGPR_3	Control	C_2	2	1	4	1.4	NA	QEP2_210813_AB_137
O60216;Q9H4I0	O60216	Double-strand-break repair protein rad21 homolog	RAD21	LFSLPAQPLWNNR_2	Control	C_2	2	1	4	1.4	NA	QEP2_210813_AB_137
O60216;Q9H4I0	O60216	Double-strand-break repair protein rad21 homolog	RAD21	MAFRPGVVDLPEENR_3	Control	C_2	2	1	4	1.4	NA	QEP2_210813_AB_137
O60216;Q9H4I0	O60216	Double-strand-break repair protein rad21 homolog	RAD21	TGAESISLLELCR_2	Control	C_2	2	1	4	1.4	NA	QEP2_210813_AB_137
O60216;Q9H4I0	O60216	Double-strand-break repair protein rad21 homolog	RAD21	TNIDESAMPPPPPQGVK_2	Control	C_2	2	1	4	1.4	NA	QEP2_210813_AB_137
O60216;Q9H4I0	O60216	Double-strand-break repair protein rad21 homolog	RAD21	TNIDESAMPPPPPQGVKR_3	Control	C_2	2	1	4	1.4	NA	QEP2_210813_AB_137
O60216;Q9H4I0	O60216	Double-strand-break repair protein rad21 homolog	RAD21	TSGHLLLGVVR_2	Control	C_2	2	1	4	1.4	NA	QEP2_210813_AB_137
O60216;Q9H4I0	O60216	Double-strand-break repair protein rad21 homolog	RAD21	DVIDEPIIEEPSRLQESVMEASR_3	Control	C_3	3	1	8	1.8	NA	QEP2_210813_AB_153
O60216;Q9H4I0	O60216	Double-strand-break repair protein rad21 homolog	RAD21	FYSFLVLK_2	Control	C_3	3	1	8	1.8	NA	QEP2_210813_AB_153
O60216;Q9H4I0	O60216	Double-strand-break repair protein rad21 homolog	RAD21	KQQAIELTQEEPYSDIIATPGPR_3	Control	C_3	3	1	8	1.8	NA	QEP2_210813_AB_153
O60216;Q9H4I0	O60216	Double-strand-break repair protein rad21 homolog	RAD21	LFSLPAQPLWNNR_2	Control	C_3	3	1	8	1.8	NA	QEP2_210813_AB_153
O60216;Q9H4I0	O60216	Double-strand-break repair protein rad21 homolog	RAD21	MAFRPGVVDLPEENR_3	Control	C_3	3	1	8	1.8	NA	QEP2_210813_AB_153
O60216;Q9H4I0	O60216	Double-strand-break repair protein rad21 homolog	RAD21	TGAESISLLELCR_2	Control	C_3	3	1	8	1.8	NA	QEP2_210813_AB_153
O60216;Q9H4I0	O60216	Double-strand-break repair protein rad21 homolog	RAD21	TNIDESAMPPPPPQGVK_2	Control	C_3	3	1	8	1.8	NA	QEP2_210813_AB_153
O60216;Q9H4I0	O60216	Double-strand-break repair protein rad21 homolog	RAD21	TNIDESAMPPPPPQGVKR_3	Control	C_3	3	1	8	1.8	NA	QEP2_210813_AB_153
O60216;Q9H4I0	O60216	Double-strand-break repair protein rad21 homolog	RAD21	TSGHLLLGVVR_2	Control	C_3	3	1	8	1.8	NA	QEP2_210813_AB_153
O60216;Q9H4I0	O60216	Double-strand-break repair protein rad21 homolog	RAD21	DVIDEPIIEEPSRLQESVMEASR_3	Short	S_1	4	2	1	2.1	21.3507	QEP2_210813_AB_125
O60216;Q9H4I0	O60216	Double-strand-break repair protein rad21 homolog	RAD21	FYSFLVLK_2	Short	S_1	4	2	1	2.1	20.3381	QEP2_210813_AB_125
O60216;Q9H4I0	O60216	Double-strand-break repair protein rad21 homolog	RAD21	KQQAIELTQEEPYSDIIATPGPR_3	Short	S_1	4	2	1	2.1	NA	QEP2_210813_AB_125
O60216;Q9H4I0	O60216	Double-strand-break repair protein rad21 homolog	RAD21	LFSLPAQPLWNNR_2	Short	S_1	4	2	1	2.1	22.3824	QEP2_210813_AB_125
O60216;Q9H4I0	O60216	Double-strand-break repair protein rad21 homolog	RAD21	MAFRPGVVDLPEENR_3	Short	S_1	4	2	1	2.1	NA	QEP2_210813_AB_125
O60216;Q9H4I0	O60216	Double-strand-break repair protein rad21 homolog	RAD21	TGAESISLLELCR_2	Short	S_1	4	2	1	2.1	NA	QEP2_210813_AB_125
O60216;Q9H4I0	O60216	Double-strand-break repair protein rad21 homolog	RAD21	TNIDESAMPPPPPQGVK_2	Short	S_1	4	2	1	2.1	19.5954	QEP2_210813_AB_125
O60216;Q9H4I0	O60216	Double-strand-break repair protein rad21 homolog	RAD21	TNIDESAMPPPPPQGVKR_3	Short	S_1	4	2	1	2.1	NA	QEP2_210813_AB_125
O60216;Q9H4I0	O60216	Double-strand-break repair protein rad21 homolog	RAD21	TSGHLLLGVVR_2	Short	S_1	4	2	1	2.1	NA	QEP2_210813_AB_125
O60216;Q9H4I0	O60216	Double-strand-break repair protein rad21 homolog	RAD21	DVIDEPIIEEPSRLQESVMEASR_3	Short	S_2	5	2	6	2.6	21.7886	QEP2_210813_AB_145
O60216;Q9H4I0	O60216	Double-strand-break repair protein rad21 homolog	RAD21	FYSFLVLK_2	Short	S_2	5	2	6	2.6	21.5163	QEP2_210813_AB_145
O60216;Q9H4I0	O60216	Double-strand-break repair protein rad21 homolog	RAD21	KQQAIELTQEEPYSDIIATPGPR_3	Short	S_2	5	2	6	2.6	22.6301	QEP2_210813_AB_145
O60216;Q9H4I0	O60216	Double-strand-break repair protein rad21 homolog	RAD21	LFSLPAQPLWNNR_2	Short	S_2	5	2	6	2.6	22.8301	QEP2_210813_AB_145
O60216;Q9H4I0	O60216	Double-strand-break repair protein rad21 homolog	RAD21	MAFRPGVVDLPEENR_3	Short	S_2	5	2	6	2.6	19.5877	QEP2_210813_AB_145
O60216;Q9H4I0	O60216	Double-strand-break repair protein rad21 homolog	RAD21	TGAESISLLELCR_2	Short	S_2	5	2	6	2.6	21.0876	QEP2_210813_AB_145
O60216;Q9H4I0	O60216	Double-strand-break repair protein rad21 homolog	RAD21	TNIDESAMPPPPPQGVK_2	Short	S_2	5	2	6	2.6	20.5328	QEP2_210813_AB_145
O60216;Q9H4I0	O60216	Double-strand-break repair protein rad21 homolog	RAD21	TNIDESAMPPPPPQGVKR_3	Short	S_2	5	2	6	2.6	21.188	QEP2_210813_AB_145
O60216;Q9H4I0	O60216	Double-strand-break repair protein rad21 homolog	RAD21	TSGHLLLGVVR_2	Short	S_2	5	2	6	2.6	NA	QEP2_210813_AB_145
O60216;Q9H4I0	O60216	Double-strand-break repair protein rad21 homolog	RAD21	DVIDEPIIEEPSRLQESVMEASR_3	Short	S_3	6	2	9	2.9	22.3907	QEP2_210813_AB_157
O60216;Q9H4I0	O60216	Double-strand-break repair protein rad21 homolog	RAD21	FYSFLVLK_2	Short	S_3	6	2	9	2.9	21.8753	QEP2_210813_AB_157
O60216;Q9H4I0	O60216	Double-strand-break repair protein rad21 homolog	RAD21	KQQAIELTQEEPYSDIIATPGPR_3	Short	S_3	6	2	9	2.9	23.1881	QEP2_210813_AB_157
O60216;Q9H4I0	O60216	Double-strand-break repair protein rad21 homolog	RAD21	LFSLPAQPLWNNR_2	Short	S_3	6	2	9	2.9	23.5179	QEP2_210813_AB_157
O60216;Q9H4I0	O60216	Double-strand-break repair protein rad21 homolog	RAD21	MAFRPGVVDLPEENR_3	Short	S_3	6	2	9	2.9	20.5377	QEP2_210813_AB_157
O60216;Q9H4I0	O60216	Double-strand-break repair protein rad21 homolog	RAD21	TGAESISLLELCR_2	Short	S_3	6	2	9	2.9	20.9316	QEP2_210813_AB_157
O60216;Q9H4I0	O60216	Double-strand-break repair protein rad21 homolog	RAD21	TNIDESAMPPPPPQGVK_2	Short	S_3	6	2	9	2.9	20.3891	QEP2_210813_AB_157
O60216;Q9H4I0	O60216	Double-strand-break repair protein rad21 homolog	RAD21	TNIDESAMPPPPPQGVKR_3	Short	S_3	6	2	9	2.9	20.338	QEP2_210813_AB_157
O60216;Q9H4I0	O60216	Double-strand-break repair protein rad21 homolog	RAD21	TSGHLLLGVVR_2	Short	S_3	6	2	9	2.9	20.0889	QEP2_210813_AB_157
O60216;Q9H4I0	O60216	Double-strand-break repair protein rad21 homolog	RAD21	DVIDEPIIEEPSRLQESVMEASR_3	Long	L_1	7	3	2	3.2	NA	QEP2_210813_AB_129
O60216;Q9H4I0	O60216	Double-strand-break repair protein rad21 homolog	RAD21	FYSFLVLK_2	Long	L_1	7	3	2	3.2	20.7478	QEP2_210813_AB_129
O60216;Q9H4I0	O60216	Double-strand-break repair protein rad21 homolog	RAD21	KQQAIELTQEEPYSDIIATPGPR_3	Long	L_1	7	3	2	3.2	NA	QEP2_210813_AB_129
O60216;Q9H4I0	O60216	Double-strand-break repair protein rad21 homolog	RAD21	LFSLPAQPLWNNR_2	Long	L_1	7	3	2	3.2	22.8238	QEP2_210813_AB_129
O60216;Q9H4I0	O60216	Double-strand-break repair protein rad21 homolog	RAD21	MAFRPGVVDLPEENR_3	Long	L_1	7	3	2	3.2	19.9562	QEP2_210813_AB_129
O60216;Q9H4I0	O60216	Double-strand-break repair protein rad21 homolog	RAD21	TGAESISLLELCR_2	Long	L_1	7	3	2	3.2	NA	QEP2_210813_AB_129
O60216;Q9H4I0	O60216	Double-strand-break repair protein rad21 homolog	RAD21	TNIDESAMPPPPPQGVK_2	Long	L_1	7	3	2	3.2	19.3845	QEP2_210813_AB_129
O60216;Q9H4I0	O60216	Double-strand-break repair protein rad21 homolog	RAD21	TNIDESAMPPPPPQGVKR_3	Long	L_1	7	3	2	3.2	NA	QEP2_210813_AB_129
O60216;Q9H4I0	O60216	Double-strand-break repair protein rad21 homolog	RAD21	TSGHLLLGVVR_2	Long	L_1	7	3	2	3.2	NA	QEP2_210813_AB_129
O60216;Q9H4I0	O60216	Double-strand-break repair protein rad21 homolog	RAD21	DVIDEPIIEEPSRLQESVMEASR_3	Long	L_2	8	3	5	3.5	22.95	QEP2_210813_AB_141
O60216;Q9H4I0	O60216	Double-strand-break repair protein rad21 homolog	RAD21	FYSFLVLK_2	Long	L_2	8	3	5	3.5	22.468	QEP2_210813_AB_141
O60216;Q9H4I0	O60216	Double-strand-break repair protein rad21 homolog	RAD21	KQQAIELTQEEPYSDIIATPGPR_3	Long	L_2	8	3	5	3.5	23.2461	QEP2_210813_AB_141
O60216;Q9H4I0	O60216	Double-strand-break repair protein rad21 homolog	RAD21	LFSLPAQPLWNNR_2	Long	L_2	8	3	5	3.5	23.7954	QEP2_210813_AB_141
O60216;Q9H4I0	O60216	Double-strand-break repair protein rad21 homolog	RAD21	MAFRPGVVDLPEENR_3	Long	L_2	8	3	5	3.5	20.8013	QEP2_210813_AB_141
O60216;Q9H4I0	O60216	Double-strand-break repair protein rad21 homolog	RAD21	TGAESISLLELCR_2	Long	L_2	8	3	5	3.5	22.1258	QEP2_210813_AB_141
O60216;Q9H4I0	O60216	Double-strand-break repair protein rad21 homolog	RAD21	TNIDESAMPPPPPQGVK_2	Long	L_2	8	3	5	3.5	21.3946	QEP2_210813_AB_141
O60216;Q9H4I0	O60216	Double-strand-break repair protein rad21 homolog	RAD21	TNIDESAMPPPPPQGVKR_3	Long	L_2	8	3	5	3.5	20.9039	QEP2_210813_AB_141
O60216;Q9H4I0	O60216	Double-strand-break repair protein rad21 homolog	RAD21	TSGHLLLGVVR_2	Long	L_2	8	3	5	3.5	20.8135	QEP2_210813_AB_141
O60216;Q9H4I0	O60216	Double-strand-break repair protein rad21 homolog	RAD21	DVIDEPIIEEPSRLQESVMEASR_3	Long	L_3	9	3	7	3.7	NA	QEP2_210813_AB_149
O60216;Q9H4I0	O60216	Double-strand-break repair protein rad21 homolog	RAD21	FYSFLVLK_2	Long	L_3	9	3	7	3.7	22.054	QEP2_210813_AB_149
O60216;Q9H4I0	O60216	Double-strand-break repair protein rad21 homolog	RAD21	KQQAIELTQEEPYSDIIATPGPR_3	Long	L_3	9	3	7	3.7	22.2583	QEP2_210813_AB_149
O60216;Q9H4I0	O60216	Double-strand-break repair protein rad21 homolog	RAD21	LFSLPAQPLWNNR_2	Long	L_3	9	3	7	3.7	23.6589	QEP2_210813_AB_149
O60216;Q9H4I0	O60216	Double-strand-break repair protein rad21 homolog	RAD21	MAFRPGVVDLPEENR_3	Long	L_3	9	3	7	3.7	NA	QEP2_210813_AB_149
O60216;Q9H4I0	O60216	Double-strand-break repair protein rad21 homolog	RAD21	TGAESISLLELCR_2	Long	L_3	9	3	7	3.7	20.9076	QEP2_210813_AB_149
O60216;Q9H4I0	O60216	Double-strand-break repair protein rad21 homolog	RAD21	TNIDESAMPPPPPQGVK_2	Long	L_3	9	3	7	3.7	20.2	QEP2_210813_AB_149
O60216;Q9H4I0	O60216	Double-strand-break repair protein rad21 homolog	RAD21	TNIDESAMPPPPPQGVKR_3	Long	L_3	9	3	7	3.7	21.7027	QEP2_210813_AB_149
O60216;Q9H4I0	O60216	Double-strand-break repair protein rad21 homolog	RAD21	TSGHLLLGVVR_2	Long	L_3	9	3	7	3.7	20.4667	QEP2_210813_AB_149
P42212;CON__Q9U6Y5	P42212	Green fluorescent protein	GFP	AEVKFEGDTLVNR_2	Control	C_1	1	1	3	1.3	NA	QEP2_210813_AB_133
P42212;CON__Q9U6Y5	P42212	Green fluorescent protein	GFP	AEVKFEGDTLVNR_3	Control	C_1	1	1	3	1.3	NA	QEP2_210813_AB_133
P42212;CON__Q9U6Y5	P42212	Green fluorescent protein	GFP	AEVKFEGDTLVNRIELK_2	Control	C_1	1	1	3	1.3	NA	QEP2_210813_AB_133
P42212;CON__Q9U6Y5	P42212	Green fluorescent protein	GFP	AEVKFEGDTLVNRIELK_3	Control	C_1	1	1	3	1.3	NA	QEP2_210813_AB_133
P42212;CON__Q9U6Y5	P42212	Green fluorescent protein	GFP	AEVKFEGDTLVNRIELK_4	Control	C_1	1	1	3	1.3	NA	QEP2_210813_AB_133
P42212;CON__Q9U6Y5	P42212	Green fluorescent protein	GFP	EDGNILGHK_2	Control	C_1	1	1	3	1.3	NA	QEP2_210813_AB_133
P42212;CON__Q9U6Y5	P42212	Green fluorescent protein	GFP	EDGNILGHKLEYNYNSHNVYIMADK_4	Control	C_1	1	1	3	1.3	NA	QEP2_210813_AB_133
P42212;CON__Q9U6Y5	P42212	Green fluorescent protein	GFP	EDGNILGHKLEYNYNSHNVYIMADKQK_4	Control	C_1	1	1	3	1.3	NA	QEP2_210813_AB_133
P42212;CON__Q9U6Y5	P42212	Green fluorescent protein	GFP	FEGDTLVNR_2	Control	C_1	1	1	3	1.3	NA	QEP2_210813_AB_133
P42212;CON__Q9U6Y5	P42212	Green fluorescent protein	GFP	FEGDTLVNRIELK_2	Control	C_1	1	1	3	1.3	NA	QEP2_210813_AB_133
P42212;CON__Q9U6Y5	P42212	Green fluorescent protein	GFP	FEGDTLVNRIELK_3	Control	C_1	1	1	3	1.3	NA	QEP2_210813_AB_133
P42212;CON__Q9U6Y5	P42212	Green fluorescent protein	GFP	FICTTGK_2	Control	C_1	1	1	3	1.3	NA	QEP2_210813_AB_133
P42212;CON__Q9U6Y5	P42212	Green fluorescent protein	GFP	FSVSGEGEGDATYGK_2	Control	C_1	1	1	3	1.3	NA	QEP2_210813_AB_133
P42212;CON__Q9U6Y5	P42212	Green fluorescent protein	GFP	FSVSGEGEGDATYGKLTLK_2	Control	C_1	1	1	3	1.3	NA	QEP2_210813_AB_133
P42212;CON__Q9U6Y5	P42212	Green fluorescent protein	GFP	FSVSGEGEGDATYGKLTLK_3	Control	C_1	1	1	3	1.3	NA	QEP2_210813_AB_133
P42212;CON__Q9U6Y5	P42212	Green fluorescent protein	GFP	GEELFTGVVPILVELDGDVNGHK_3	Control	C_1	1	1	3	1.3	NA	QEP2_210813_AB_133
P42212;CON__Q9U6Y5	P42212	Green fluorescent protein	GFP	GIDFKEDGNILGHK_2	Control	C_1	1	1	3	1.3	NA	QEP2_210813_AB_133
P42212;CON__Q9U6Y5	P42212	Green fluorescent protein	GFP	GIDFKEDGNILGHK_3	Control	C_1	1	1	3	1.3	NA	QEP2_210813_AB_133
P42212;CON__Q9U6Y5	P42212	Green fluorescent protein	GFP	GIDFKEDGNILGHKLEYNYNSHNVYIMADK_4	Control	C_1	1	1	3	1.3	NA	QEP2_210813_AB_133
P42212;CON__Q9U6Y5	P42212	Green fluorescent protein	GFP	GIDFKEDGNILGHKLEYNYNSHNVYIMADK_5	Control	C_1	1	1	3	1.3	NA	QEP2_210813_AB_133
P42212;CON__Q9U6Y5	P42212	Green fluorescent protein	GFP	IELKGIDFKEDGNILGHK_3	Control	C_1	1	1	3	1.3	NA	QEP2_210813_AB_133
P42212;CON__Q9U6Y5	P42212	Green fluorescent protein	GFP	IELKGIDFKEDGNILGHK_4	Control	C_1	1	1	3	1.3	NA	QEP2_210813_AB_133
P42212;CON__Q9U6Y5	P42212	Green fluorescent protein	GFP	LEYNYNSHNVYIM(Oxidation (M))ADK_3	Control	C_1	1	1	3	1.3	NA	QEP2_210813_AB_133
P42212;CON__Q9U6Y5	P42212	Green fluorescent protein	GFP	LEYNYNSHNVYIM(Oxidation (M))ADKQK_3	Control	C_1	1	1	3	1.3	NA	QEP2_210813_AB_133
P42212;CON__Q9U6Y5	P42212	Green fluorescent protein	GFP	LEYNYNSHNVYIM(Oxidation (M))ADKQK_4	Control	C_1	1	1	3	1.3	NA	QEP2_210813_AB_133
P42212;CON__Q9U6Y5	P42212	Green fluorescent protein	GFP	LEYNYNSHNVYIMADK_2	Control	C_1	1	1	3	1.3	NA	QEP2_210813_AB_133
P42212;CON__Q9U6Y5	P42212	Green fluorescent protein	GFP	LEYNYNSHNVYIMADK_3	Control	C_1	1	1	3	1.3	NA	QEP2_210813_AB_133
P42212;CON__Q9U6Y5	P42212	Green fluorescent protein	GFP	LEYNYNSHNVYIMADKQK_2	Control	C_1	1	1	3	1.3	NA	QEP2_210813_AB_133
P42212;CON__Q9U6Y5	P42212	Green fluorescent protein	GFP	LEYNYNSHNVYIMADKQK_3	Control	C_1	1	1	3	1.3	NA	QEP2_210813_AB_133
P42212;CON__Q9U6Y5	P42212	Green fluorescent protein	GFP	LEYNYNSHNVYIMADKQK_4	Control	C_1	1	1	3	1.3	NA	QEP2_210813_AB_133
P42212;CON__Q9U6Y5	P42212	Green fluorescent protein	GFP	NGIKVNFK_2	Control	C_1	1	1	3	1.3	NA	QEP2_210813_AB_133
P42212;CON__Q9U6Y5	P42212	Green fluorescent protein	GFP	SAM(Oxidation (M))PEGYVQER_2	Control	C_1	1	1	3	1.3	NA	QEP2_210813_AB_133
P42212;CON__Q9U6Y5	P42212	Green fluorescent protein	GFP	SAMPEGYVQER_2	Control	C_1	1	1	3	1.3	NA	QEP2_210813_AB_133
P42212;CON__Q9U6Y5	P42212	Green fluorescent protein	GFP	TIFFKDDGNYK_2	Control	C_1	1	1	3	1.3	18.5052	QEP2_210813_AB_133
P42212;CON__Q9U6Y5	P42212	Green fluorescent protein	GFP	TIFFKDDGNYK_3	Control	C_1	1	1	3	1.3	NA	QEP2_210813_AB_133
P42212;CON__Q9U6Y5	P42212	Green fluorescent protein	GFP	TIFFKDDGNYKTR_2	Control	C_1	1	1	3	1.3	NA	QEP2_210813_AB_133
P42212;CON__Q9U6Y5	P42212	Green fluorescent protein	GFP	TIFFKDDGNYKTR_3	Control	C_1	1	1	3	1.3	NA	QEP2_210813_AB_133
P42212;CON__Q9U6Y5	P42212	Green fluorescent protein	GFP	TIFFKDDGNYKTR_4	Control	C_1	1	1	3	1.3	NA	QEP2_210813_AB_133
P42212;CON__Q9U6Y5	P42212	Green fluorescent protein	GFP	TRAEVKFEGDTLVNR_2	Control	C_1	1	1	3	1.3	NA	QEP2_210813_AB_133
P42212;CON__Q9U6Y5	P42212	Green fluorescent protein	GFP	TRAEVKFEGDTLVNR_3	Control	C_1	1	1	3	1.3	NA	QEP2_210813_AB_133
P42212;CON__Q9U6Y5	P42212	Green fluorescent protein	GFP	TRAEVKFEGDTLVNR_4	Control	C_1	1	1	3	1.3	NA	QEP2_210813_AB_133
P42212;CON__Q9U6Y5	P42212	Green fluorescent protein	GFP	YPDHM(Oxidation (M))KQHDFFK_3	Control	C_1	1	1	3	1.3	NA	QEP2_210813_AB_133
P42212;CON__Q9U6Y5	P42212	Green fluorescent protein	GFP	YPDHM(Oxidation (M))KQHDFFK_4	Control	C_1	1	1	3	1.3	NA	QEP2_210813_AB_133
P42212;CON__Q9U6Y5	P42212	Green fluorescent protein	GFP	YPDHMKQHDFFK_2	Control	C_1	1	1	3	1.3	NA	QEP2_210813_AB_133
P42212;CON__Q9U6Y5	P42212	Green fluorescent protein	GFP	YPDHMKQHDFFK_3	Control	C_1	1	1	3	1.3	NA	QEP2_210813_AB_133
P42212;CON__Q9U6Y5	P42212	Green fluorescent protein	GFP	AEVKFEGDTLVNR_2	Control	C_2	2	1	4	1.4	NA	QEP2_210813_AB_137
P42212;CON__Q9U6Y5	P42212	Green fluorescent protein	GFP	AEVKFEGDTLVNR_3	Control	C_2	2	1	4	1.4	NA	QEP2_210813_AB_137
P42212;CON__Q9U6Y5	P42212	Green fluorescent protein	GFP	AEVKFEGDTLVNRIELK_2	Control	C_2	2	1	4	1.4	NA	QEP2_210813_AB_137
P42212;CON__Q9U6Y5	P42212	Green fluorescent protein	GFP	AEVKFEGDTLVNRIELK_3	Control	C_2	2	1	4	1.4	NA	QEP2_210813_AB_137
P42212;CON__Q9U6Y5	P42212	Green fluorescent protein	GFP	AEVKFEGDTLVNRIELK_4	Control	C_2	2	1	4	1.4	NA	QEP2_210813_AB_137
P42212;CON__Q9U6Y5	P42212	Green fluorescent protein	GFP	EDGNILGHK_2	Control	C_2	2	1	4	1.4	NA	QEP2_210813_AB_137
P42212;CON__Q9U6Y5	P42212	Green fluorescent protein	GFP	EDGNILGHKLEYNYNSHNVYIMADK_4	Control	C_2	2	1	4	1.4	NA	QEP2_210813_AB_137
P42212;CON__Q9U6Y5	P42212	Green fluorescent protein	GFP	EDGNILGHKLEYNYNSHNVYIMADKQK_4	Control	C_2	2	1	4	1.4	NA	QEP2_210813_AB_137
P42212;CON__Q9U6Y5	P42212	Green fluorescent protein	GFP	FEGDTLVNR_2	Control	C_2	2	1	4	1.4	NA	QEP2_210813_AB_137
P42212;CON__Q9U6Y5	P42212	Green fluorescent protein	GFP	FEGDTLVNRIELK_2	Control	C_2	2	1	4	1.4	NA	QEP2_210813_AB_137
P42212;CON__Q9U6Y5	P42212	Green fluorescent protein	GFP	FEGDTLVNRIELK_3	Control	C_2	2	1	4	1.4	NA	QEP2_210813_AB_137
P42212;CON__Q9U6Y5	P42212	Green fluorescent protein	GFP	FICTTGK_2	Control	C_2	2	1	4	1.4	NA	QEP2_210813_AB_137
P42212;CON__Q9U6Y5	P42212	Green fluorescent protein	GFP	FSVSGEGEGDATYGK_2	Control	C_2	2	1	4	1.4	NA	QEP2_210813_AB_137
P42212;CON__Q9U6Y5	P42212	Green fluorescent protein	GFP	FSVSGEGEGDATYGKLTLK_2	Control	C_2	2	1	4	1.4	NA	QEP2_210813_AB_137
P42212;CON__Q9U6Y5	P42212	Green fluorescent protein	GFP	FSVSGEGEGDATYGKLTLK_3	Control	C_2	2	1	4	1.4	NA	QEP2_210813_AB_137
P42212;CON__Q9U6Y5	P42212	Green fluorescent protein	GFP	GEELFTGVVPILVELDGDVNGHK_3	Control	C_2	2	1	4	1.4	NA	QEP2_210813_AB_137
P42212;CON__Q9U6Y5	P42212	Green fluorescent protein	GFP	GIDFKEDGNILGHK_2	Control	C_2	2	1	4	1.4	NA	QEP2_210813_AB_137
P42212;CON__Q9U6Y5	P42212	Green fluorescent protein	GFP	GIDFKEDGNILGHK_3	Control	C_2	2	1	4	1.4	NA	QEP2_210813_AB_137
P42212;CON__Q9U6Y5	P42212	Green fluorescent protein	GFP	GIDFKEDGNILGHKLEYNYNSHNVYIMADK_4	Control	C_2	2	1	4	1.4	NA	QEP2_210813_AB_137
P42212;CON__Q9U6Y5	P42212	Green fluorescent protein	GFP	GIDFKEDGNILGHKLEYNYNSHNVYIMADK_5	Control	C_2	2	1	4	1.4	NA	QEP2_210813_AB_137
P42212;CON__Q9U6Y5	P42212	Green fluorescent protein	GFP	IELKGIDFKEDGNILGHK_3	Control	C_2	2	1	4	1.4	NA	QEP2_210813_AB_137
P42212;CON__Q9U6Y5	P42212	Green fluorescent protein	GFP	IELKGIDFKEDGNILGHK_4	Control	C_2	2	1	4	1.4	NA	QEP2_210813_AB_137
P42212;CON__Q9U6Y5	P42212	Green fluorescent protein	GFP	LEYNYNSHNVYIM(Oxidation (M))ADK_3	Control	C_2	2	1	4	1.4	NA	QEP2_210813_AB_137
P42212;CON__Q9U6Y5	P42212	Green fluorescent protein	GFP	LEYNYNSHNVYIM(Oxidation (M))ADKQK_3	Control	C_2	2	1	4	1.4	NA	QEP2_210813_AB_137
P42212;CON__Q9U6Y5	P42212	Green fluorescent protein	GFP	LEYNYNSHNVYIM(Oxidation (M))ADKQK_4	Control	C_2	2	1	4	1.4	NA	QEP2_210813_AB_137
P42212;CON__Q9U6Y5	P42212	Green fluorescent protein	GFP	LEYNYNSHNVYIMADK_2	Control	C_2	2	1	4	1.4	NA	QEP2_210813_AB_137
P42212;CON__Q9U6Y5	P42212	Green fluorescent protein	GFP	LEYNYNSHNVYIMADK_3	Control	C_2	2	1	4	1.4	NA	QEP2_210813_AB_137
P42212;CON__Q9U6Y5	P42212	Green fluorescent protein	GFP	LEYNYNSHNVYIMADKQK_2	Control	C_2	2	1	4	1.4	NA	QEP2_210813_AB_137
P42212;CON__Q9U6Y5	P42212	Green fluorescent protein	GFP	LEYNYNSHNVYIMADKQK_3	Control	C_2	2	1	4	1.4	NA	QEP2_210813_AB_137
P42212;CON__Q9U6Y5	P42212	Green fluorescent protein	GFP	LEYNYNSHNVYIMADKQK_4	Control	C_2	2	1	4	1.4	NA	QEP2_210813_AB_137
P42212;CON__Q9U6Y5	P42212	Green fluorescent protein	GFP	NGIKVNFK_2	Control	C_2	2	1	4	1.4	NA	QEP2_210813_AB_137
P42212;CON__Q9U6Y5	P42212	Green fluorescent protein	GFP	SAM(Oxidation (M))PEGYVQER_2	Control	C_2	2	1	4	1.4	NA	QEP2_210813_AB_137
P42212;CON__Q9U6Y5	P42212	Green fluorescent protein	GFP	SAMPEGYVQER_2	Control	C_2	2	1	4	1.4	NA	QEP2_210813_AB_137
P42212;CON__Q9U6Y5	P42212	Green fluorescent protein	GFP	TIFFKDDGNYK_2	Control	C_2	2	1	4	1.4	NA	QEP2_210813_AB_137
P42212;CON__Q9U6Y5	P42212	Green fluorescent protein	GFP	TIFFKDDGNYK_3	Control	C_2	2	1	4	1.4	NA	QEP2_210813_AB_137
P42212;CON__Q9U6Y5	P42212	Green fluorescent protein	GFP	TIFFKDDGNYKTR_2	Control	C_2	2	1	4	1.4	NA	QEP2_210813_AB_137
P42212;CON__Q9U6Y5	P42212	Green fluorescent protein	GFP	TIFFKDDGNYKTR_3	Control	C_2	2	1	4	1.4	NA	QEP2_210813_AB_137
P42212;CON__Q9U6Y5	P42212	Green fluorescent protein	GFP	TIFFKDDGNYKTR_4	Control	C_2	2	1	4	1.4	NA	QEP2_210813_AB_137
P42212;CON__Q9U6Y5	P42212	Green fluorescent protein	GFP	TRAEVKFEGDTLVNR_2	Control	C_2	2	1	4	1.4	NA	QEP2_210813_AB_137
P42212;CON__Q9U6Y5	P42212	Green fluorescent protein	GFP	TRAEVKFEGDTLVNR_3	Control	C_2	2	1	4	1.4	NA	QEP2_210813_AB_137
P42212;CON__Q9U6Y5	P42212	Green fluorescent protein	GFP	TRAEVKFEGDTLVNR_4	Control	C_2	2	1	4	1.4	NA	QEP2_210813_AB_137
P42212;CON__Q9U6Y5	P42212	Green fluorescent protein	GFP	YPDHM(Oxidation (M))KQHDFFK_3	Control	C_2	2	1	4	1.4	NA	QEP2_210813_AB_137
P42212;CON__Q9U6Y5	P42212	Green fluorescent protein	GFP	YPDHM(Oxidation (M))KQHDFFK_4	Control	C_2	2	1	4	1.4	NA	QEP2_210813_AB_137
P42212;CON__Q9U6Y5	P42212	Green fluorescent protein	GFP	YPDHMKQHDFFK_2	Control	C_2	2	1	4	1.4	NA	QEP2_210813_AB_137
P42212;CON__Q9U6Y5	P42212	Green fluorescent protein	GFP	YPDHMKQHDFFK_3	Control	C_2	2	1	4	1.4	NA	QEP2_210813_AB_137
P42212;CON__Q9U6Y5	P42212	Green fluorescent protein	GFP	AEVKFEGDTLVNR_2	Control	C_3	3	1	8	1.8	NA	QEP2_210813_AB_153
P42212;CON__Q9U6Y5	P42212	Green fluorescent protein	GFP	AEVKFEGDTLVNR_3	Control	C_3	3	1	8	1.8	NA	QEP2_210813_AB_153
P42212;CON__Q9U6Y5	P42212	Green fluorescent protein	GFP	AEVKFEGDTLVNRIELK_2	Control	C_3	3	1	8	1.8	NA	QEP2_210813_AB_153
P42212;CON__Q9U6Y5	P42212	Green fluorescent protein	GFP	AEVKFEGDTLVNRIELK_3	Control	C_3	3	1	8	1.8	NA	QEP2_210813_AB_153
P42212;CON__Q9U6Y5	P42212	Green fluorescent protein	GFP	AEVKFEGDTLVNRIELK_4	Control	C_3	3	1	8	1.8	NA	QEP2_210813_AB_153
P42212;CON__Q9U6Y5	P42212	Green fluorescent protein	GFP	EDGNILGHK_2	Control	C_3	3	1	8	1.8	NA	QEP2_210813_AB_153
P42212;CON__Q9U6Y5	P42212	Green fluorescent protein	GFP	EDGNILGHKLEYNYNSHNVYIMADK_4	Control	C_3	3	1	8	1.8	NA	QEP2_210813_AB_153
P42212;CON__Q9U6Y5	P42212	Green fluorescent protein	GFP	EDGNILGHKLEYNYNSHNVYIMADKQK_4	Control	C_3	3	1	8	1.8	NA	QEP2_210813_AB_153
P42212;CON__Q9U6Y5	P42212	Green fluorescent protein	GFP	FEGDTLVNR_2	Control	C_3	3	1	8	1.8	NA	QEP2_210813_AB_153
P42212;CON__Q9U6Y5	P42212	Green fluorescent protein	GFP	FEGDTLVNRIELK_2	Control	C_3	3	1	8	1.8	NA	QEP2_210813_AB_153
P42212;CON__Q9U6Y5	P42212	Green fluorescent protein	GFP	FEGDTLVNRIELK_3	Control	C_3	3	1	8	1.8	NA	QEP2_210813_AB_153
P42212;CON__Q9U6Y5	P42212	Green fluorescent protein	GFP	FICTTGK_2	Control	C_3	3	1	8	1.8	NA	QEP2_210813_AB_153
P42212;CON__Q9U6Y5	P42212	Green fluorescent protein	GFP	FSVSGEGEGDATYGK_2	Control	C_3	3	1	8	1.8	NA	QEP2_210813_AB_153
P42212;CON__Q9U6Y5	P42212	Green fluorescent protein	GFP	FSVSGEGEGDATYGKLTLK_2	Control	C_3	3	1	8	1.8	NA	QEP2_210813_AB_153
P42212;CON__Q9U6Y5	P42212	Green fluorescent protein	GFP	FSVSGEGEGDATYGKLTLK_3	Control	C_3	3	1	8	1.8	NA	QEP2_210813_AB_153
P42212;CON__Q9U6Y5	P42212	Green fluorescent protein	GFP	GEELFTGVVPILVELDGDVNGHK_3	Control	C_3	3	1	8	1.8	NA	QEP2_210813_AB_153
P42212;CON__Q9U6Y5	P42212	Green fluorescent protein	GFP	GIDFKEDGNILGHK_2	Control	C_3	3	1	8	1.8	NA	QEP2_210813_AB_153
P42212;CON__Q9U6Y5	P42212	Green fluorescent protein	GFP	GIDFKEDGNILGHK_3	Control	C_3	3	1	8	1.8	NA	QEP2_210813_AB_153
P42212;CON__Q9U6Y5	P42212	Green fluorescent protein	GFP	GIDFKEDGNILGHKLEYNYNSHNVYIMADK_4	Control	C_3	3	1	8	1.8	NA	QEP2_210813_AB_153
P42212;CON__Q9U6Y5	P42212	Green fluorescent protein	GFP	GIDFKEDGNILGHKLEYNYNSHNVYIMADK_5	Control	C_3	3	1	8	1.8	NA	QEP2_210813_AB_153
P42212;CON__Q9U6Y5	P42212	Green fluorescent protein	GFP	IELKGIDFKEDGNILGHK_3	Control	C_3	3	1	8	1.8	NA	QEP2_210813_AB_153
P42212;CON__Q9U6Y5	P42212	Green fluorescent protein	GFP	IELKGIDFKEDGNILGHK_4	Control	C_3	3	1	8	1.8	NA	QEP2_210813_AB_153
P42212;CON__Q9U6Y5	P42212	Green fluorescent protein	GFP	LEYNYNSHNVYIM(Oxidation (M))ADK_3	Control	C_3	3	1	8	1.8	NA	QEP2_210813_AB_153
P42212;CON__Q9U6Y5	P42212	Green fluorescent protein	GFP	LEYNYNSHNVYIM(Oxidation (M))ADKQK_3	Control	C_3	3	1	8	1.8	NA	QEP2_210813_AB_153
P42212;CON__Q9U6Y5	P42212	Green fluorescent protein	GFP	LEYNYNSHNVYIM(Oxidation (M))ADKQK_4	Control	C_3	3	1	8	1.8	NA	QEP2_210813_AB_153
P42212;CON__Q9U6Y5	P42212	Green fluorescent protein	GFP	LEYNYNSHNVYIMADK_2	Control	C_3	3	1	8	1.8	NA	QEP2_210813_AB_153
P42212;CON__Q9U6Y5	P42212	Green fluorescent protein	GFP	LEYNYNSHNVYIMADK_3	Control	C_3	3	1	8	1.8	NA	QEP2_210813_AB_153
P42212;CON__Q9U6Y5	P42212	Green fluorescent protein	GFP	LEYNYNSHNVYIMADKQK_2	Control	C_3	3	1	8	1.8	NA	QEP2_210813_AB_153
P42212;CON__Q9U6Y5	P42212	Green fluorescent protein	GFP	LEYNYNSHNVYIMADKQK_3	Control	C_3	3	1	8	1.8	NA	QEP2_210813_AB_153
P42212;CON__Q9U6Y5	P42212	Green fluorescent protein	GFP	LEYNYNSHNVYIMADKQK_4	Control	C_3	3	1	8	1.8	NA	QEP2_210813_AB_153
P42212;CON__Q9U6Y5	P42212	Green fluorescent protein	GFP	NGIKVNFK_2	Control	C_3	3	1	8	1.8	NA	QEP2_210813_AB_153
P42212;CON__Q9U6Y5	P42212	Green fluorescent protein	GFP	SAM(Oxidation (M))PEGYVQER_2	Control	C_3	3	1	8	1.8	NA	QEP2_210813_AB_153
P42212;CON__Q9U6Y5	P42212	Green fluorescent protein	GFP	SAMPEGYVQER_2	Control	C_3	3	1	8	1.8	NA	QEP2_210813_AB_153
P42212;CON__Q9U6Y5	P42212	Green fluorescent protein	GFP	TIFFKDDGNYK_2	Control	C_3	3	1	8	1.8	NA	QEP2_210813_AB_153
P42212;CON__Q9U6Y5	P42212	Green fluorescent protein	GFP	TIFFKDDGNYK_3	Control	C_3	3	1	8	1.8	NA	QEP2_210813_AB_153
P42212;CON__Q9U6Y5	P42212	Green fluorescent protein	GFP	TIFFKDDGNYKTR_2	Control	C_3	3	1	8	1.8	NA	QEP2_210813_AB_153
P42212;CON__Q9U6Y5	P42212	Green fluorescent protein	GFP	TIFFKDDGNYKTR_3	Control	C_3	3	1	8	1.8	NA	QEP2_210813_AB_153
P42212;CON__Q9U6Y5	P42212	Green fluorescent protein	GFP	TIFFKDDGNYKTR_4	Control	C_3	3	1	8	1.8	NA	QEP2_210813_AB_153
P42212;CON__Q9U6Y5	P42212	Green fluorescent protein	GFP	TRAEVKFEGDTLVNR_2	Control	C_3	3	1	8	1.8	NA	QEP2_210813_AB_153
P42212;CON__Q9U6Y5	P42212	Green fluorescent protein	GFP	TRAEVKFEGDTLVNR_3	Control	C_3	3	1	8	1.8	NA	QEP2_210813_AB_153
P42212;CON__Q9U6Y5	P42212	Green fluorescent protein	GFP	TRAEVKFEGDTLVNR_4	Control	C_3	3	1	8	1.8	NA	QEP2_210813_AB_153
P42212;CON__Q9U6Y5	P42212	Green fluorescent protein	GFP	YPDHM(Oxidation (M))KQHDFFK_3	Control	C_3	3	1	8	1.8	NA	QEP2_210813_AB_153
P42212;CON__Q9U6Y5	P42212	Green fluorescent protein	GFP	YPDHM(Oxidation (M))KQHDFFK_4	Control	C_3	3	1	8	1.8	NA	QEP2_210813_AB_153
P42212;CON__Q9U6Y5	P42212	Green fluorescent protein	GFP	YPDHMKQHDFFK_2	Control	C_3	3	1	8	1.8	NA	QEP2_210813_AB_153
P42212;CON__Q9U6Y5	P42212	Green fluorescent protein	GFP	YPDHMKQHDFFK_3	Control	C_3	3	1	8	1.8	NA	QEP2_210813_AB_153
P42212;CON__Q9U6Y5	P42212	Green fluorescent protein	GFP	AEVKFEGDTLVNR_2	Short	S_1	4	2	1	2.1	29.3494	QEP2_210813_AB_125
P42212;CON__Q9U6Y5	P42212	Green fluorescent protein	GFP	AEVKFEGDTLVNR_3	Short	S_1	4	2	1	2.1	30.8719	QEP2_210813_AB_125
P42212;CON__Q9U6Y5	P42212	Green fluorescent protein	GFP	AEVKFEGDTLVNRIELK_2	Short	S_1	4	2	1	2.1	22.1246	QEP2_210813_AB_125
P42212;CON__Q9U6Y5	P42212	Green fluorescent protein	GFP	AEVKFEGDTLVNRIELK_3	Short	S_1	4	2	1	2.1	NA	QEP2_210813_AB_125
P42212;CON__Q9U6Y5	P42212	Green fluorescent protein	GFP	AEVKFEGDTLVNRIELK_4	Short	S_1	4	2	1	2.1	27.0027	QEP2_210813_AB_125
P42212;CON__Q9U6Y5	P42212	Green fluorescent protein	GFP	EDGNILGHK_2	Short	S_1	4	2	1	2.1	28.4725	QEP2_210813_AB_125
P42212;CON__Q9U6Y5	P42212	Green fluorescent protein	GFP	EDGNILGHKLEYNYNSHNVYIMADK_4	Short	S_1	4	2	1	2.1	24.9447	QEP2_210813_AB_125
P42212;CON__Q9U6Y5	P42212	Green fluorescent protein	GFP	EDGNILGHKLEYNYNSHNVYIMADKQK_4	Short	S_1	4	2	1	2.1	24.8452	QEP2_210813_AB_125
P42212;CON__Q9U6Y5	P42212	Green fluorescent protein	GFP	FEGDTLVNR_2	Short	S_1	4	2	1	2.1	31.05	QEP2_210813_AB_125
P42212;CON__Q9U6Y5	P42212	Green fluorescent protein	GFP	FEGDTLVNRIELK_2	Short	S_1	4	2	1	2.1	24.0749	QEP2_210813_AB_125
P42212;CON__Q9U6Y5	P42212	Green fluorescent protein	GFP	FEGDTLVNRIELK_3	Short	S_1	4	2	1	2.1	26.538	QEP2_210813_AB_125
P42212;CON__Q9U6Y5	P42212	Green fluorescent protein	GFP	FICTTGK_2	Short	S_1	4	2	1	2.1	29.7858	QEP2_210813_AB_125
P42212;CON__Q9U6Y5	P42212	Green fluorescent protein	GFP	FSVSGEGEGDATYGK_2	Short	S_1	4	2	1	2.1	29.7698	QEP2_210813_AB_125
P42212;CON__Q9U6Y5	P42212	Green fluorescent protein	GFP	FSVSGEGEGDATYGKLTLK_2	Short	S_1	4	2	1	2.1	22.4833	QEP2_210813_AB_125
P42212;CON__Q9U6Y5	P42212	Green fluorescent protein	GFP	FSVSGEGEGDATYGKLTLK_3	Short	S_1	4	2	1	2.1	25.4661	QEP2_210813_AB_125
P42212;CON__Q9U6Y5	P42212	Green fluorescent protein	GFP	GEELFTGVVPILVELDGDVNGHK_3	Short	S_1	4	2	1	2.1	26.6986	QEP2_210813_AB_125
P42212;CON__Q9U6Y5	P42212	Green fluorescent protein	GFP	GIDFKEDGNILGHK_2	Short	S_1	4	2	1	2.1	28.2112	QEP2_210813_AB_125
P42212;CON__Q9U6Y5	P42212	Green fluorescent protein	GFP	GIDFKEDGNILGHK_3	Short	S_1	4	2	1	2.1	31.3291	QEP2_210813_AB_125
P42212;CON__Q9U6Y5	P42212	Green fluorescent protein	GFP	GIDFKEDGNILGHKLEYNYNSHNVYIMADK_4	Short	S_1	4	2	1	2.1	28.3736	QEP2_210813_AB_125
P42212;CON__Q9U6Y5	P42212	Green fluorescent protein	GFP	GIDFKEDGNILGHKLEYNYNSHNVYIMADK_5	Short	S_1	4	2	1	2.1	28.8502	QEP2_210813_AB_125
P42212;CON__Q9U6Y5	P42212	Green fluorescent protein	GFP	IELKGIDFKEDGNILGHK_3	Short	S_1	4	2	1	2.1	NA	QEP2_210813_AB_125
P42212;CON__Q9U6Y5	P42212	Green fluorescent protein	GFP	IELKGIDFKEDGNILGHK_4	Short	S_1	4	2	1	2.1	NA	QEP2_210813_AB_125
P42212;CON__Q9U6Y5	P42212	Green fluorescent protein	GFP	LEYNYNSHNVYIM(Oxidation (M))ADK_3	Short	S_1	4	2	1	2.1	27.5815	QEP2_210813_AB_125
P42212;CON__Q9U6Y5	P42212	Green fluorescent protein	GFP	LEYNYNSHNVYIM(Oxidation (M))ADKQK_3	Short	S_1	4	2	1	2.1	25.6651	QEP2_210813_AB_125
P42212;CON__Q9U6Y5	P42212	Green fluorescent protein	GFP	LEYNYNSHNVYIM(Oxidation (M))ADKQK_4	Short	S_1	4	2	1	2.1	26.5069	QEP2_210813_AB_125
P42212;CON__Q9U6Y5	P42212	Green fluorescent protein	GFP	LEYNYNSHNVYIMADK_2	Short	S_1	4	2	1	2.1	27.8405	QEP2_210813_AB_125
P42212;CON__Q9U6Y5	P42212	Green fluorescent protein	GFP	LEYNYNSHNVYIMADK_3	Short	S_1	4	2	1	2.1	31.072	QEP2_210813_AB_125
P42212;CON__Q9U6Y5	P42212	Green fluorescent protein	GFP	LEYNYNSHNVYIMADKQK_2	Short	S_1	4	2	1	2.1	26.2887	QEP2_210813_AB_125
P42212;CON__Q9U6Y5	P42212	Green fluorescent protein	GFP	LEYNYNSHNVYIMADKQK_3	Short	S_1	4	2	1	2.1	29.6949	QEP2_210813_AB_125
P42212;CON__Q9U6Y5	P42212	Green fluorescent protein	GFP	LEYNYNSHNVYIMADKQK_4	Short	S_1	4	2	1	2.1	30.3025	QEP2_210813_AB_125
P42212;CON__Q9U6Y5	P42212	Green fluorescent protein	GFP	NGIKVNFK_2	Short	S_1	4	2	1	2.1	23.2383	QEP2_210813_AB_125
P42212;CON__Q9U6Y5	P42212	Green fluorescent protein	GFP	SAM(Oxidation (M))PEGYVQER_2	Short	S_1	4	2	1	2.1	28.0535	QEP2_210813_AB_125
P42212;CON__Q9U6Y5	P42212	Green fluorescent protein	GFP	SAMPEGYVQER_2	Short	S_1	4	2	1	2.1	31.6239	QEP2_210813_AB_125
P42212;CON__Q9U6Y5	P42212	Green fluorescent protein	GFP	TIFFKDDGNYK_2	Short	S_1	4	2	1	2.1	31.1115	QEP2_210813_AB_125
P42212;CON__Q9U6Y5	P42212	Green fluorescent protein	GFP	TIFFKDDGNYK_3	Short	S_1	4	2	1	2.1	31.509	QEP2_210813_AB_125
P42212;CON__Q9U6Y5	P42212	Green fluorescent protein	GFP	TIFFKDDGNYKTR_2	Short	S_1	4	2	1	2.1	20.4958	QEP2_210813_AB_125
P42212;CON__Q9U6Y5	P42212	Green fluorescent protein	GFP	TIFFKDDGNYKTR_3	Short	S_1	4	2	1	2.1	24.5134	QEP2_210813_AB_125
P42212;CON__Q9U6Y5	P42212	Green fluorescent protein	GFP	TIFFKDDGNYKTR_4	Short	S_1	4	2	1	2.1	22.2888	QEP2_210813_AB_125
P42212;CON__Q9U6Y5	P42212	Green fluorescent protein	GFP	TRAEVKFEGDTLVNR_2	Short	S_1	4	2	1	2.1	21.717	QEP2_210813_AB_125
P42212;CON__Q9U6Y5	P42212	Green fluorescent protein	GFP	TRAEVKFEGDTLVNR_3	Short	S_1	4	2	1	2.1	25.6268	QEP2_210813_AB_125
P42212;CON__Q9U6Y5	P42212	Green fluorescent protein	GFP	TRAEVKFEGDTLVNR_4	Short	S_1	4	2	1	2.1	23.2485	QEP2_210813_AB_125
P42212;CON__Q9U6Y5	P42212	Green fluorescent protein	GFP	YPDHM(Oxidation (M))KQHDFFK_3	Short	S_1	4	2	1	2.1	21.896	QEP2_210813_AB_125
P42212;CON__Q9U6Y5	P42212	Green fluorescent protein	GFP	YPDHM(Oxidation (M))KQHDFFK_4	Short	S_1	4	2	1	2.1	NA	QEP2_210813_AB_125
P42212;CON__Q9U6Y5	P42212	Green fluorescent protein	GFP	YPDHMKQHDFFK_2	Short	S_1	4	2	1	2.1	NA	QEP2_210813_AB_125
P42212;CON__Q9U6Y5	P42212	Green fluorescent protein	GFP	YPDHMKQHDFFK_3	Short	S_1	4	2	1	2.1	NA	QEP2_210813_AB_125
P42212;CON__Q9U6Y5	P42212	Green fluorescent protein	GFP	AEVKFEGDTLVNR_2	Short	S_2	5	2	6	2.6	27.081	QEP2_210813_AB_145
P42212;CON__Q9U6Y5	P42212	Green fluorescent protein	GFP	AEVKFEGDTLVNR_3	Short	S_2	5	2	6	2.6	29.3445	QEP2_210813_AB_145
P42212;CON__Q9U6Y5	P42212	Green fluorescent protein	GFP	AEVKFEGDTLVNRIELK_2	Short	S_2	5	2	6	2.6	25.8814	QEP2_210813_AB_145
P42212;CON__Q9U6Y5	P42212	Green fluorescent protein	GFP	AEVKFEGDTLVNRIELK_3	Short	S_2	5	2	6	2.6	30.1648	QEP2_210813_AB_145
P42212;CON__Q9U6Y5	P42212	Green fluorescent protein	GFP	AEVKFEGDTLVNRIELK_4	Short	S_2	5	2	6	2.6	30.5754	QEP2_210813_AB_145
P42212;CON__Q9U6Y5	P42212	Green fluorescent protein	GFP	EDGNILGHK_2	Short	S_2	5	2	6	2.6	23.4302	QEP2_210813_AB_145
P42212;CON__Q9U6Y5	P42212	Green fluorescent protein	GFP	EDGNILGHKLEYNYNSHNVYIMADK_4	Short	S_2	5	2	6	2.6	NA	QEP2_210813_AB_145
P42212;CON__Q9U6Y5	P42212	Green fluorescent protein	GFP	EDGNILGHKLEYNYNSHNVYIMADKQK_4	Short	S_2	5	2	6	2.6	NA	QEP2_210813_AB_145
P42212;CON__Q9U6Y5	P42212	Green fluorescent protein	GFP	FEGDTLVNR_2	Short	S_2	5	2	6	2.6	26.6603	QEP2_210813_AB_145
P42212;CON__Q9U6Y5	P42212	Green fluorescent protein	GFP	FEGDTLVNRIELK_2	Short	S_2	5	2	6	2.6	25.8718	QEP2_210813_AB_145
P42212;CON__Q9U6Y5	P42212	Green fluorescent protein	GFP	FEGDTLVNRIELK_3	Short	S_2	5	2	6	2.6	27.909	QEP2_210813_AB_145
P42212;CON__Q9U6Y5	P42212	Green fluorescent protein	GFP	FICTTGK_2	Short	S_2	5	2	6	2.6	27.6779	QEP2_210813_AB_145
P42212;CON__Q9U6Y5	P42212	Green fluorescent protein	GFP	FSVSGEGEGDATYGK_2	Short	S_2	5	2	6	2.6	26.43	QEP2_210813_AB_145
P42212;CON__Q9U6Y5	P42212	Green fluorescent protein	GFP	FSVSGEGEGDATYGKLTLK_2	Short	S_2	5	2	6	2.6	24.3762	QEP2_210813_AB_145
P42212;CON__Q9U6Y5	P42212	Green fluorescent protein	GFP	FSVSGEGEGDATYGKLTLK_3	Short	S_2	5	2	6	2.6	28.3429	QEP2_210813_AB_145
P42212;CON__Q9U6Y5	P42212	Green fluorescent protein	GFP	GEELFTGVVPILVELDGDVNGHK_3	Short	S_2	5	2	6	2.6	NA	QEP2_210813_AB_145
P42212;CON__Q9U6Y5	P42212	Green fluorescent protein	GFP	GIDFKEDGNILGHK_2	Short	S_2	5	2	6	2.6	23.176	QEP2_210813_AB_145
P42212;CON__Q9U6Y5	P42212	Green fluorescent protein	GFP	GIDFKEDGNILGHK_3	Short	S_2	5	2	6	2.6	27.7213	QEP2_210813_AB_145
P42212;CON__Q9U6Y5	P42212	Green fluorescent protein	GFP	GIDFKEDGNILGHKLEYNYNSHNVYIMADK_4	Short	S_2	5	2	6	2.6	NA	QEP2_210813_AB_145
P42212;CON__Q9U6Y5	P42212	Green fluorescent protein	GFP	GIDFKEDGNILGHKLEYNYNSHNVYIMADK_5	Short	S_2	5	2	6	2.6	NA	QEP2_210813_AB_145
P42212;CON__Q9U6Y5	P42212	Green fluorescent protein	GFP	IELKGIDFKEDGNILGHK_3	Short	S_2	5	2	6	2.6	22.9721	QEP2_210813_AB_145
P42212;CON__Q9U6Y5	P42212	Green fluorescent protein	GFP	IELKGIDFKEDGNILGHK_4	Short	S_2	5	2	6	2.6	25.0874	QEP2_210813_AB_145
P42212;CON__Q9U6Y5	P42212	Green fluorescent protein	GFP	LEYNYNSHNVYIM(Oxidation (M))ADK_3	Short	S_2	5	2	6	2.6	NA	QEP2_210813_AB_145
P42212;CON__Q9U6Y5	P42212	Green fluorescent protein	GFP	LEYNYNSHNVYIM(Oxidation (M))ADKQK_3	Short	S_2	5	2	6	2.6	22.4997	QEP2_210813_AB_145
P42212;CON__Q9U6Y5	P42212	Green fluorescent protein	GFP	LEYNYNSHNVYIM(Oxidation (M))ADKQK_4	Short	S_2	5	2	6	2.6	23.7266	QEP2_210813_AB_145
P42212;CON__Q9U6Y5	P42212	Green fluorescent protein	GFP	LEYNYNSHNVYIMADK_2	Short	S_2	5	2	6	2.6	NA	QEP2_210813_AB_145
P42212;CON__Q9U6Y5	P42212	Green fluorescent protein	GFP	LEYNYNSHNVYIMADK_3	Short	S_2	5	2	6	2.6	24.1156	QEP2_210813_AB_145
P42212;CON__Q9U6Y5	P42212	Green fluorescent protein	GFP	LEYNYNSHNVYIMADKQK_2	Short	S_2	5	2	6	2.6	22.5982	QEP2_210813_AB_145
P42212;CON__Q9U6Y5	P42212	Green fluorescent protein	GFP	LEYNYNSHNVYIMADKQK_3	Short	S_2	5	2	6	2.6	27.0974	QEP2_210813_AB_145
P42212;CON__Q9U6Y5	P42212	Green fluorescent protein	GFP	LEYNYNSHNVYIMADKQK_4	Short	S_2	5	2	6	2.6	28.0617	QEP2_210813_AB_145
P42212;CON__Q9U6Y5	P42212	Green fluorescent protein	GFP	NGIKVNFK_2	Short	S_2	5	2	6	2.6	26.8173	QEP2_210813_AB_145
P42212;CON__Q9U6Y5	P42212	Green fluorescent protein	GFP	SAM(Oxidation (M))PEGYVQER_2	Short	S_2	5	2	6	2.6	27.7599	QEP2_210813_AB_145
P42212;CON__Q9U6Y5	P42212	Green fluorescent protein	GFP	SAMPEGYVQER_2	Short	S_2	5	2	6	2.6	31.2052	QEP2_210813_AB_145
P42212;CON__Q9U6Y5	P42212	Green fluorescent protein	GFP	TIFFKDDGNYK_2	Short	S_2	5	2	6	2.6	29.6956	QEP2_210813_AB_145
P42212;CON__Q9U6Y5	P42212	Green fluorescent protein	GFP	TIFFKDDGNYK_3	Short	S_2	5	2	6	2.6	30.4599	QEP2_210813_AB_145
P42212;CON__Q9U6Y5	P42212	Green fluorescent protein	GFP	TIFFKDDGNYKTR_2	Short	S_2	5	2	6	2.6	25.6964	QEP2_210813_AB_145
P42212;CON__Q9U6Y5	P42212	Green fluorescent protein	GFP	TIFFKDDGNYKTR_3	Short	S_2	5	2	6	2.6	30.0874	QEP2_210813_AB_145
P42212;CON__Q9U6Y5	P42212	Green fluorescent protein	GFP	TIFFKDDGNYKTR_4	Short	S_2	5	2	6	2.6	27.9687	QEP2_210813_AB_145
P42212;CON__Q9U6Y5	P42212	Green fluorescent protein	GFP	TRAEVKFEGDTLVNR_2	Short	S_2	5	2	6	2.6	21.2829	QEP2_210813_AB_145
P42212;CON__Q9U6Y5	P42212	Green fluorescent protein	GFP	TRAEVKFEGDTLVNR_3	Short	S_2	5	2	6	2.6	26.1081	QEP2_210813_AB_145
P42212;CON__Q9U6Y5	P42212	Green fluorescent protein	GFP	TRAEVKFEGDTLVNR_4	Short	S_2	5	2	6	2.6	23.9021	QEP2_210813_AB_145
P42212;CON__Q9U6Y5	P42212	Green fluorescent protein	GFP	YPDHM(Oxidation (M))KQHDFFK_3	Short	S_2	5	2	6	2.6	25.0641	QEP2_210813_AB_145
P42212;CON__Q9U6Y5	P42212	Green fluorescent protein	GFP	YPDHM(Oxidation (M))KQHDFFK_4	Short	S_2	5	2	6	2.6	25.0101	QEP2_210813_AB_145
P42212;CON__Q9U6Y5	P42212	Green fluorescent protein	GFP	YPDHMKQHDFFK_2	Short	S_2	5	2	6	2.6	20.7125	QEP2_210813_AB_145
P42212;CON__Q9U6Y5	P42212	Green fluorescent protein	GFP	YPDHMKQHDFFK_3	Short	S_2	5	2	6	2.6	26.2663	QEP2_210813_AB_145
P42212;CON__Q9U6Y5	P42212	Green fluorescent protein	GFP	AEVKFEGDTLVNR_2	Short	S_3	6	2	9	2.9	28.1417	QEP2_210813_AB_157
P42212;CON__Q9U6Y5	P42212	Green fluorescent protein	GFP	AEVKFEGDTLVNR_3	Short	S_3	6	2	9	2.9	30.3067	QEP2_210813_AB_157
P42212;CON__Q9U6Y5	P42212	Green fluorescent protein	GFP	AEVKFEGDTLVNRIELK_2	Short	S_3	6	2	9	2.9	23.7888	QEP2_210813_AB_157
P42212;CON__Q9U6Y5	P42212	Green fluorescent protein	GFP	AEVKFEGDTLVNRIELK_3	Short	S_3	6	2	9	2.9	29.1159	QEP2_210813_AB_157
P42212;CON__Q9U6Y5	P42212	Green fluorescent protein	GFP	AEVKFEGDTLVNRIELK_4	Short	S_3	6	2	9	2.9	29.6781	QEP2_210813_AB_157
P42212;CON__Q9U6Y5	P42212	Green fluorescent protein	GFP	EDGNILGHK_2	Short	S_3	6	2	9	2.9	NA	QEP2_210813_AB_157
P42212;CON__Q9U6Y5	P42212	Green fluorescent protein	GFP	EDGNILGHKLEYNYNSHNVYIMADK_4	Short	S_3	6	2	9	2.9	NA	QEP2_210813_AB_157
P42212;CON__Q9U6Y5	P42212	Green fluorescent protein	GFP	EDGNILGHKLEYNYNSHNVYIMADKQK_4	Short	S_3	6	2	9	2.9	22.3964	QEP2_210813_AB_157
P42212;CON__Q9U6Y5	P42212	Green fluorescent protein	GFP	FEGDTLVNR_2	Short	S_3	6	2	9	2.9	28.3275	QEP2_210813_AB_157
P42212;CON__Q9U6Y5	P42212	Green fluorescent protein	GFP	FEGDTLVNRIELK_2	Short	S_3	6	2	9	2.9	25.3705	QEP2_210813_AB_157
P42212;CON__Q9U6Y5	P42212	Green fluorescent protein	GFP	FEGDTLVNRIELK_3	Short	S_3	6	2	9	2.9	28.1514	QEP2_210813_AB_157
P42212;CON__Q9U6Y5	P42212	Green fluorescent protein	GFP	FICTTGK_2	Short	S_3	6	2	9	2.9	28.5582	QEP2_210813_AB_157
P42212;CON__Q9U6Y5	P42212	Green fluorescent protein	GFP	FSVSGEGEGDATYGK_2	Short	S_3	6	2	9	2.9	27.8384	QEP2_210813_AB_157
P42212;CON__Q9U6Y5	P42212	Green fluorescent protein	GFP	FSVSGEGEGDATYGKLTLK_2	Short	S_3	6	2	9	2.9	23.7765	QEP2_210813_AB_157
P42212;CON__Q9U6Y5	P42212	Green fluorescent protein	GFP	FSVSGEGEGDATYGKLTLK_3	Short	S_3	6	2	9	2.9	27.7617	QEP2_210813_AB_157
P42212;CON__Q9U6Y5	P42212	Green fluorescent protein	GFP	GEELFTGVVPILVELDGDVNGHK_3	Short	S_3	6	2	9	2.9	20.3892	QEP2_210813_AB_157
P42212;CON__Q9U6Y5	P42212	Green fluorescent protein	GFP	GIDFKEDGNILGHK_2	Short	S_3	6	2	9	2.9	24.1651	QEP2_210813_AB_157
P42212;CON__Q9U6Y5	P42212	Green fluorescent protein	GFP	GIDFKEDGNILGHK_3	Short	S_3	6	2	9	2.9	28.9068	QEP2_210813_AB_157
P42212;CON__Q9U6Y5	P42212	Green fluorescent protein	GFP	GIDFKEDGNILGHKLEYNYNSHNVYIMADK_4	Short	S_3	6	2	9	2.9	22.395	QEP2_210813_AB_157
P42212;CON__Q9U6Y5	P42212	Green fluorescent protein	GFP	GIDFKEDGNILGHKLEYNYNSHNVYIMADK_5	Short	S_3	6	2	9	2.9	23.2096	QEP2_210813_AB_157
P42212;CON__Q9U6Y5	P42212	Green fluorescent protein	GFP	IELKGIDFKEDGNILGHK_3	Short	S_3	6	2	9	2.9	21.5815	QEP2_210813_AB_157
P42212;CON__Q9U6Y5	P42212	Green fluorescent protein	GFP	IELKGIDFKEDGNILGHK_4	Short	S_3	6	2	9	2.9	23.8883	QEP2_210813_AB_157
P42212;CON__Q9U6Y5	P42212	Green fluorescent protein	GFP	LEYNYNSHNVYIM(Oxidation (M))ADK_3	Short	S_3	6	2	9	2.9	NA	QEP2_210813_AB_157
P42212;CON__Q9U6Y5	P42212	Green fluorescent protein	GFP	LEYNYNSHNVYIM(Oxidation (M))ADKQK_3	Short	S_3	6	2	9	2.9	NA	QEP2_210813_AB_157
P42212;CON__Q9U6Y5	P42212	Green fluorescent protein	GFP	LEYNYNSHNVYIM(Oxidation (M))ADKQK_4	Short	S_3	6	2	9	2.9	24.8918	QEP2_210813_AB_157
P42212;CON__Q9U6Y5	P42212	Green fluorescent protein	GFP	LEYNYNSHNVYIMADK_2	Short	S_3	6	2	9	2.9	22.8968	QEP2_210813_AB_157
P42212;CON__Q9U6Y5	P42212	Green fluorescent protein	GFP	LEYNYNSHNVYIMADK_3	Short	S_3	6	2	9	2.9	27.2161	QEP2_210813_AB_157
P42212;CON__Q9U6Y5	P42212	Green fluorescent protein	GFP	LEYNYNSHNVYIMADKQK_2	Short	S_3	6	2	9	2.9	23.3644	QEP2_210813_AB_157
P42212;CON__Q9U6Y5	P42212	Green fluorescent protein	GFP	LEYNYNSHNVYIMADKQK_3	Short	S_3	6	2	9	2.9	27.8402	QEP2_210813_AB_157
P42212;CON__Q9U6Y5	P42212	Green fluorescent protein	GFP	LEYNYNSHNVYIMADKQK_4	Short	S_3	6	2	9	2.9	28.8058	QEP2_210813_AB_157
P42212;CON__Q9U6Y5	P42212	Green fluorescent protein	GFP	NGIKVNFK_2	Short	S_3	6	2	9	2.9	25.6443	QEP2_210813_AB_157
P42212;CON__Q9U6Y5	P42212	Green fluorescent protein	GFP	SAM(Oxidation (M))PEGYVQER_2	Short	S_3	6	2	9	2.9	27.3197	QEP2_210813_AB_157
P42212;CON__Q9U6Y5	P42212	Green fluorescent protein	GFP	SAMPEGYVQER_2	Short	S_3	6	2	9	2.9	31.6575	QEP2_210813_AB_157
P42212;CON__Q9U6Y5	P42212	Green fluorescent protein	GFP	TIFFKDDGNYK_2	Short	S_3	6	2	9	2.9	30.2481	QEP2_210813_AB_157
P42212;CON__Q9U6Y5	P42212	Green fluorescent protein	GFP	TIFFKDDGNYK_3	Short	S_3	6	2	9	2.9	31.1064	QEP2_210813_AB_157
P42212;CON__Q9U6Y5	P42212	Green fluorescent protein	GFP	TIFFKDDGNYKTR_2	Short	S_3	6	2	9	2.9	23.1079	QEP2_210813_AB_157
P42212;CON__Q9U6Y5	P42212	Green fluorescent protein	GFP	TIFFKDDGNYKTR_3	Short	S_3	6	2	9	2.9	27.8204	QEP2_210813_AB_157
P42212;CON__Q9U6Y5	P42212	Green fluorescent protein	GFP	TIFFKDDGNYKTR_4	Short	S_3	6	2	9	2.9	25.6601	QEP2_210813_AB_157
P42212;CON__Q9U6Y5	P42212	Green fluorescent protein	GFP	TRAEVKFEGDTLVNR_2	Short	S_3	6	2	9	2.9	21.4878	QEP2_210813_AB_157
P42212;CON__Q9U6Y5	P42212	Green fluorescent protein	GFP	TRAEVKFEGDTLVNR_3	Short	S_3	6	2	9	2.9	26.1319	QEP2_210813_AB_157
P42212;CON__Q9U6Y5	P42212	Green fluorescent protein	GFP	TRAEVKFEGDTLVNR_4	Short	S_3	6	2	9	2.9	24.1257	QEP2_210813_AB_157
P42212;CON__Q9U6Y5	P42212	Green fluorescent protein	GFP	YPDHM(Oxidation (M))KQHDFFK_3	Short	S_3	6	2	9	2.9	23.5838	QEP2_210813_AB_157
P42212;CON__Q9U6Y5	P42212	Green fluorescent protein	GFP	YPDHM(Oxidation (M))KQHDFFK_4	Short	S_3	6	2	9	2.9	22.1139	QEP2_210813_AB_157
P42212;CON__Q9U6Y5	P42212	Green fluorescent protein	GFP	YPDHMKQHDFFK_2	Short	S_3	6	2	9	2.9	NA	QEP2_210813_AB_157
P42212;CON__Q9U6Y5	P42212	Green fluorescent protein	GFP	YPDHMKQHDFFK_3	Short	S_3	6	2	9	2.9	23.9405	QEP2_210813_AB_157
P42212;CON__Q9U6Y5	P42212	Green fluorescent protein	GFP	AEVKFEGDTLVNR_2	Long	L_1	7	3	2	3.2	29.2544	QEP2_210813_AB_129
P42212;CON__Q9U6Y5	P42212	Green fluorescent protein	GFP	AEVKFEGDTLVNR_3	Long	L_1	7	3	2	3.2	30.8917	QEP2_210813_AB_129
P42212;CON__Q9U6Y5	P42212	Green fluorescent protein	GFP	AEVKFEGDTLVNRIELK_2	Long	L_1	7	3	2	3.2	23.0966	QEP2_210813_AB_129
P42212;CON__Q9U6Y5	P42212	Green fluorescent protein	GFP	AEVKFEGDTLVNRIELK_3	Long	L_1	7	3	2	3.2	28.1814	QEP2_210813_AB_129
P42212;CON__Q9U6Y5	P42212	Green fluorescent protein	GFP	AEVKFEGDTLVNRIELK_4	Long	L_1	7	3	2	3.2	28.42	QEP2_210813_AB_129
P42212;CON__Q9U6Y5	P42212	Green fluorescent protein	GFP	EDGNILGHK_2	Long	L_1	7	3	2	3.2	NA	QEP2_210813_AB_129
P42212;CON__Q9U6Y5	P42212	Green fluorescent protein	GFP	EDGNILGHKLEYNYNSHNVYIMADK_4	Long	L_1	7	3	2	3.2	25.4016	QEP2_210813_AB_129
P42212;CON__Q9U6Y5	P42212	Green fluorescent protein	GFP	EDGNILGHKLEYNYNSHNVYIMADKQK_4	Long	L_1	7	3	2	3.2	24.7913	QEP2_210813_AB_129
P42212;CON__Q9U6Y5	P42212	Green fluorescent protein	GFP	FEGDTLVNR_2	Long	L_1	7	3	2	3.2	30.5483	QEP2_210813_AB_129
P42212;CON__Q9U6Y5	P42212	Green fluorescent protein	GFP	FEGDTLVNRIELK_2	Long	L_1	7	3	2	3.2	26.154	QEP2_210813_AB_129
P42212;CON__Q9U6Y5	P42212	Green fluorescent protein	GFP	FEGDTLVNRIELK_3	Long	L_1	7	3	2	3.2	28.244	QEP2_210813_AB_129
P42212;CON__Q9U6Y5	P42212	Green fluorescent protein	GFP	FICTTGK_2	Long	L_1	7	3	2	3.2	29.5528	QEP2_210813_AB_129
P42212;CON__Q9U6Y5	P42212	Green fluorescent protein	GFP	FSVSGEGEGDATYGK_2	Long	L_1	7	3	2	3.2	29.2944	QEP2_210813_AB_129
P42212;CON__Q9U6Y5	P42212	Green fluorescent protein	GFP	FSVSGEGEGDATYGKLTLK_2	Long	L_1	7	3	2	3.2	23.3129	QEP2_210813_AB_129
P42212;CON__Q9U6Y5	P42212	Green fluorescent protein	GFP	FSVSGEGEGDATYGKLTLK_3	Long	L_1	7	3	2	3.2	26.0179	QEP2_210813_AB_129
P42212;CON__Q9U6Y5	P42212	Green fluorescent protein	GFP	GEELFTGVVPILVELDGDVNGHK_3	Long	L_1	7	3	2	3.2	25.6712	QEP2_210813_AB_129
P42212;CON__Q9U6Y5	P42212	Green fluorescent protein	GFP	GIDFKEDGNILGHK_2	Long	L_1	7	3	2	3.2	27.7435	QEP2_210813_AB_129
P42212;CON__Q9U6Y5	P42212	Green fluorescent protein	GFP	GIDFKEDGNILGHK_3	Long	L_1	7	3	2	3.2	31.2017	QEP2_210813_AB_129
P42212;CON__Q9U6Y5	P42212	Green fluorescent protein	GFP	GIDFKEDGNILGHKLEYNYNSHNVYIMADK_4	Long	L_1	7	3	2	3.2	27.6925	QEP2_210813_AB_129
P42212;CON__Q9U6Y5	P42212	Green fluorescent protein	GFP	GIDFKEDGNILGHKLEYNYNSHNVYIMADK_5	Long	L_1	7	3	2	3.2	28.2001	QEP2_210813_AB_129
P42212;CON__Q9U6Y5	P42212	Green fluorescent protein	GFP	IELKGIDFKEDGNILGHK_3	Long	L_1	7	3	2	3.2	20.7218	QEP2_210813_AB_129
P42212;CON__Q9U6Y5	P42212	Green fluorescent protein	GFP	IELKGIDFKEDGNILGHK_4	Long	L_1	7	3	2	3.2	22.4065	QEP2_210813_AB_129
P42212;CON__Q9U6Y5	P42212	Green fluorescent protein	GFP	LEYNYNSHNVYIM(Oxidation (M))ADK_3	Long	L_1	7	3	2	3.2	26.7391	QEP2_210813_AB_129
P42212;CON__Q9U6Y5	P42212	Green fluorescent protein	GFP	LEYNYNSHNVYIM(Oxidation (M))ADKQK_3	Long	L_1	7	3	2	3.2	24.6847	QEP2_210813_AB_129
P42212;CON__Q9U6Y5	P42212	Green fluorescent protein	GFP	LEYNYNSHNVYIM(Oxidation (M))ADKQK_4	Long	L_1	7	3	2	3.2	27.0704	QEP2_210813_AB_129
P42212;CON__Q9U6Y5	P42212	Green fluorescent protein	GFP	LEYNYNSHNVYIMADK_2	Long	L_1	7	3	2	3.2	NA	QEP2_210813_AB_129
P42212;CON__Q9U6Y5	P42212	Green fluorescent protein	GFP	LEYNYNSHNVYIMADK_3	Long	L_1	7	3	2	3.2	22.2535	QEP2_210813_AB_129
P42212;CON__Q9U6Y5	P42212	Green fluorescent protein	GFP	LEYNYNSHNVYIMADKQK_2	Long	L_1	7	3	2	3.2	27.0081	QEP2_210813_AB_129
P42212;CON__Q9U6Y5	P42212	Green fluorescent protein	GFP	LEYNYNSHNVYIMADKQK_3	Long	L_1	7	3	2	3.2	30.7017	QEP2_210813_AB_129
P42212;CON__Q9U6Y5	P42212	Green fluorescent protein	GFP	LEYNYNSHNVYIMADKQK_4	Long	L_1	7	3	2	3.2	31.2195	QEP2_210813_AB_129
P42212;CON__Q9U6Y5	P42212	Green fluorescent protein	GFP	NGIKVNFK_2	Long	L_1	7	3	2	3.2	23.9482	QEP2_210813_AB_129
P42212;CON__Q9U6Y5	P42212	Green fluorescent protein	GFP	SAM(Oxidation (M))PEGYVQER_2	Long	L_1	7	3	2	3.2	27.9838	QEP2_210813_AB_129
P42212;CON__Q9U6Y5	P42212	Green fluorescent protein	GFP	SAMPEGYVQER_2	Long	L_1	7	3	2	3.2	31.8226	QEP2_210813_AB_129
P42212;CON__Q9U6Y5	P42212	Green fluorescent protein	GFP	TIFFKDDGNYK_2	Long	L_1	7	3	2	3.2	31.6366	QEP2_210813_AB_129
P42212;CON__Q9U6Y5	P42212	Green fluorescent protein	GFP	TIFFKDDGNYK_3	Long	L_1	7	3	2	3.2	31.9815	QEP2_210813_AB_129
P42212;CON__Q9U6Y5	P42212	Green fluorescent protein	GFP	TIFFKDDGNYKTR_2	Long	L_1	7	3	2	3.2	NA	QEP2_210813_AB_129
P42212;CON__Q9U6Y5	P42212	Green fluorescent protein	GFP	TIFFKDDGNYKTR_3	Long	L_1	7	3	2	3.2	25.2986	QEP2_210813_AB_129
P42212;CON__Q9U6Y5	P42212	Green fluorescent protein	GFP	TIFFKDDGNYKTR_4	Long	L_1	7	3	2	3.2	22.9093	QEP2_210813_AB_129
P42212;CON__Q9U6Y5	P42212	Green fluorescent protein	GFP	TRAEVKFEGDTLVNR_2	Long	L_1	7	3	2	3.2	23.066	QEP2_210813_AB_129
P42212;CON__Q9U6Y5	P42212	Green fluorescent protein	GFP	TRAEVKFEGDTLVNR_3	Long	L_1	7	3	2	3.2	26.8576	QEP2_210813_AB_129
P42212;CON__Q9U6Y5	P42212	Green fluorescent protein	GFP	TRAEVKFEGDTLVNR_4	Long	L_1	7	3	2	3.2	24.4736	QEP2_210813_AB_129
P42212;CON__Q9U6Y5	P42212	Green fluorescent protein	GFP	YPDHM(Oxidation (M))KQHDFFK_3	Long	L_1	7	3	2	3.2	23.995	QEP2_210813_AB_129
P42212;CON__Q9U6Y5	P42212	Green fluorescent protein	GFP	YPDHM(Oxidation (M))KQHDFFK_4	Long	L_1	7	3	2	3.2	24.1102	QEP2_210813_AB_129
P42212;CON__Q9U6Y5	P42212	Green fluorescent protein	GFP	YPDHMKQHDFFK_2	Long	L_1	7	3	2	3.2	22.8899	QEP2_210813_AB_129
P42212;CON__Q9U6Y5	P42212	Green fluorescent protein	GFP	YPDHMKQHDFFK_3	Long	L_1	7	3	2	3.2	25.4426	QEP2_210813_AB_129
P42212;CON__Q9U6Y5	P42212	Green fluorescent protein	GFP	AEVKFEGDTLVNR_2	Long	L_2	8	3	5	3.5	27.9477	QEP2_210813_AB_141
P42212;CON__Q9U6Y5	P42212	Green fluorescent protein	GFP	AEVKFEGDTLVNR_3	Long	L_2	8	3	5	3.5	30.0813	QEP2_210813_AB_141
P42212;CON__Q9U6Y5	P42212	Green fluorescent protein	GFP	AEVKFEGDTLVNRIELK_2	Long	L_2	8	3	5	3.5	24.0896	QEP2_210813_AB_141
P42212;CON__Q9U6Y5	P42212	Green fluorescent protein	GFP	AEVKFEGDTLVNRIELK_3	Long	L_2	8	3	5	3.5	29.3444	QEP2_210813_AB_141
P42212;CON__Q9U6Y5	P42212	Green fluorescent protein	GFP	AEVKFEGDTLVNRIELK_4	Long	L_2	8	3	5	3.5	29.6536	QEP2_210813_AB_141
P42212;CON__Q9U6Y5	P42212	Green fluorescent protein	GFP	EDGNILGHK_2	Long	L_2	8	3	5	3.5	24.3722	QEP2_210813_AB_141
P42212;CON__Q9U6Y5	P42212	Green fluorescent protein	GFP	EDGNILGHKLEYNYNSHNVYIMADK_4	Long	L_2	8	3	5	3.5	23.1258	QEP2_210813_AB_141
P42212;CON__Q9U6Y5	P42212	Green fluorescent protein	GFP	EDGNILGHKLEYNYNSHNVYIMADKQK_4	Long	L_2	8	3	5	3.5	23.2047	QEP2_210813_AB_141
P42212;CON__Q9U6Y5	P42212	Green fluorescent protein	GFP	FEGDTLVNR_2	Long	L_2	8	3	5	3.5	28.5955	QEP2_210813_AB_141
P42212;CON__Q9U6Y5	P42212	Green fluorescent protein	GFP	FEGDTLVNRIELK_2	Long	L_2	8	3	5	3.5	26.0879	QEP2_210813_AB_141
P42212;CON__Q9U6Y5	P42212	Green fluorescent protein	GFP	FEGDTLVNRIELK_3	Long	L_2	8	3	5	3.5	28.443	QEP2_210813_AB_141
P42212;CON__Q9U6Y5	P42212	Green fluorescent protein	GFP	FICTTGK_2	Long	L_2	8	3	5	3.5	28.9425	QEP2_210813_AB_141
P42212;CON__Q9U6Y5	P42212	Green fluorescent protein	GFP	FSVSGEGEGDATYGK_2	Long	L_2	8	3	5	3.5	28.3929	QEP2_210813_AB_141
P42212;CON__Q9U6Y5	P42212	Green fluorescent protein	GFP	FSVSGEGEGDATYGKLTLK_2	Long	L_2	8	3	5	3.5	25.0823	QEP2_210813_AB_141
P42212;CON__Q9U6Y5	P42212	Green fluorescent protein	GFP	FSVSGEGEGDATYGKLTLK_3	Long	L_2	8	3	5	3.5	29.0072	QEP2_210813_AB_141
P42212;CON__Q9U6Y5	P42212	Green fluorescent protein	GFP	GEELFTGVVPILVELDGDVNGHK_3	Long	L_2	8	3	5	3.5	24.2028	QEP2_210813_AB_141
P42212;CON__Q9U6Y5	P42212	Green fluorescent protein	GFP	GIDFKEDGNILGHK_2	Long	L_2	8	3	5	3.5	24.6568	QEP2_210813_AB_141
P42212;CON__Q9U6Y5	P42212	Green fluorescent protein	GFP	GIDFKEDGNILGHK_3	Long	L_2	8	3	5	3.5	29.2177	QEP2_210813_AB_141
P42212;CON__Q9U6Y5	P42212	Green fluorescent protein	GFP	GIDFKEDGNILGHKLEYNYNSHNVYIMADK_4	Long	L_2	8	3	5	3.5	25.6854	QEP2_210813_AB_141
P42212;CON__Q9U6Y5	P42212	Green fluorescent protein	GFP	GIDFKEDGNILGHKLEYNYNSHNVYIMADK_5	Long	L_2	8	3	5	3.5	26.2168	QEP2_210813_AB_141
P42212;CON__Q9U6Y5	P42212	Green fluorescent protein	GFP	IELKGIDFKEDGNILGHK_3	Long	L_2	8	3	5	3.5	22.4592	QEP2_210813_AB_141
P42212;CON__Q9U6Y5	P42212	Green fluorescent protein	GFP	IELKGIDFKEDGNILGHK_4	Long	L_2	8	3	5	3.5	24.8517	QEP2_210813_AB_141
P42212;CON__Q9U6Y5	P42212	Green fluorescent protein	GFP	LEYNYNSHNVYIM(Oxidation (M))ADK_3	Long	L_2	8	3	5	3.5	23.7198	QEP2_210813_AB_141
P42212;CON__Q9U6Y5	P42212	Green fluorescent protein	GFP	LEYNYNSHNVYIM(Oxidation (M))ADKQK_3	Long	L_2	8	3	5	3.5	24.325	QEP2_210813_AB_141
P42212;CON__Q9U6Y5	P42212	Green fluorescent protein	GFP	LEYNYNSHNVYIM(Oxidation (M))ADKQK_4	Long	L_2	8	3	5	3.5	25.3075	QEP2_210813_AB_141
P42212;CON__Q9U6Y5	P42212	Green fluorescent protein	GFP	LEYNYNSHNVYIMADK_2	Long	L_2	8	3	5	3.5	22.8607	QEP2_210813_AB_141
P42212;CON__Q9U6Y5	P42212	Green fluorescent protein	GFP	LEYNYNSHNVYIMADK_3	Long	L_2	8	3	5	3.5	27.2856	QEP2_210813_AB_141
P42212;CON__Q9U6Y5	P42212	Green fluorescent protein	GFP	LEYNYNSHNVYIMADKQK_2	Long	L_2	8	3	5	3.5	24.0233	QEP2_210813_AB_141
P42212;CON__Q9U6Y5	P42212	Green fluorescent protein	GFP	LEYNYNSHNVYIMADKQK_3	Long	L_2	8	3	5	3.5	28.6379	QEP2_210813_AB_141
P42212;CON__Q9U6Y5	P42212	Green fluorescent protein	GFP	LEYNYNSHNVYIMADKQK_4	Long	L_2	8	3	5	3.5	29.5779	QEP2_210813_AB_141
P42212;CON__Q9U6Y5	P42212	Green fluorescent protein	GFP	NGIKVNFK_2	Long	L_2	8	3	5	3.5	26.021	QEP2_210813_AB_141
P42212;CON__Q9U6Y5	P42212	Green fluorescent protein	GFP	SAM(Oxidation (M))PEGYVQER_2	Long	L_2	8	3	5	3.5	28.1592	QEP2_210813_AB_141
P42212;CON__Q9U6Y5	P42212	Green fluorescent protein	GFP	SAMPEGYVQER_2	Long	L_2	8	3	5	3.5	31.3214	QEP2_210813_AB_141
P42212;CON__Q9U6Y5	P42212	Green fluorescent protein	GFP	TIFFKDDGNYK_2	Long	L_2	8	3	5	3.5	30.7435	QEP2_210813_AB_141
P42212;CON__Q9U6Y5	P42212	Green fluorescent protein	GFP	TIFFKDDGNYK_3	Long	L_2	8	3	5	3.5	31.3719	QEP2_210813_AB_141
P42212;CON__Q9U6Y5	P42212	Green fluorescent protein	GFP	TIFFKDDGNYKTR_2	Long	L_2	8	3	5	3.5	24.0527	QEP2_210813_AB_141
P42212;CON__Q9U6Y5	P42212	Green fluorescent protein	GFP	TIFFKDDGNYKTR_3	Long	L_2	8	3	5	3.5	28.7608	QEP2_210813_AB_141
P42212;CON__Q9U6Y5	P42212	Green fluorescent protein	GFP	TIFFKDDGNYKTR_4	Long	L_2	8	3	5	3.5	26.6587	QEP2_210813_AB_141
P42212;CON__Q9U6Y5	P42212	Green fluorescent protein	GFP	TRAEVKFEGDTLVNR_2	Long	L_2	8	3	5	3.5	22.3298	QEP2_210813_AB_141
P42212;CON__Q9U6Y5	P42212	Green fluorescent protein	GFP	TRAEVKFEGDTLVNR_3	Long	L_2	8	3	5	3.5	27.0153	QEP2_210813_AB_141
P42212;CON__Q9U6Y5	P42212	Green fluorescent protein	GFP	TRAEVKFEGDTLVNR_4	Long	L_2	8	3	5	3.5	24.7085	QEP2_210813_AB_141
P42212;CON__Q9U6Y5	P42212	Green fluorescent protein	GFP	YPDHM(Oxidation (M))KQHDFFK_3	Long	L_2	8	3	5	3.5	24.7533	QEP2_210813_AB_141
P42212;CON__Q9U6Y5	P42212	Green fluorescent protein	GFP	YPDHM(Oxidation (M))KQHDFFK_4	Long	L_2	8	3	5	3.5	NA	QEP2_210813_AB_141
P42212;CON__Q9U6Y5	P42212	Green fluorescent protein	GFP	YPDHMKQHDFFK_2	Long	L_2	8	3	5	3.5	NA	QEP2_210813_AB_141
P42212;CON__Q9U6Y5	P42212	Green fluorescent protein	GFP	YPDHMKQHDFFK_3	Long	L_2	8	3	5	3.5	25.3715	QEP2_210813_AB_141
P42212;CON__Q9U6Y5	P42212	Green fluorescent protein	GFP	AEVKFEGDTLVNR_2	Long	L_3	9	3	7	3.7	27.793	QEP2_210813_AB_149
P42212;CON__Q9U6Y5	P42212	Green fluorescent protein	GFP	AEVKFEGDTLVNR_3	Long	L_3	9	3	7	3.7	30.0197	QEP2_210813_AB_149
P42212;CON__Q9U6Y5	P42212	Green fluorescent protein	GFP	AEVKFEGDTLVNRIELK_2	Long	L_3	9	3	7	3.7	25.7312	QEP2_210813_AB_149
P42212;CON__Q9U6Y5	P42212	Green fluorescent protein	GFP	AEVKFEGDTLVNRIELK_3	Long	L_3	9	3	7	3.7	30.5368	QEP2_210813_AB_149
P42212;CON__Q9U6Y5	P42212	Green fluorescent protein	GFP	AEVKFEGDTLVNRIELK_4	Long	L_3	9	3	7	3.7	30.7585	QEP2_210813_AB_149
P42212;CON__Q9U6Y5	P42212	Green fluorescent protein	GFP	EDGNILGHK_2	Long	L_3	9	3	7	3.7	22.9936	QEP2_210813_AB_149
P42212;CON__Q9U6Y5	P42212	Green fluorescent protein	GFP	EDGNILGHKLEYNYNSHNVYIMADK_4	Long	L_3	9	3	7	3.7	NA	QEP2_210813_AB_149
P42212;CON__Q9U6Y5	P42212	Green fluorescent protein	GFP	EDGNILGHKLEYNYNSHNVYIMADKQK_4	Long	L_3	9	3	7	3.7	NA	QEP2_210813_AB_149
P42212;CON__Q9U6Y5	P42212	Green fluorescent protein	GFP	FEGDTLVNR_2	Long	L_3	9	3	7	3.7	27.4082	QEP2_210813_AB_149
P42212;CON__Q9U6Y5	P42212	Green fluorescent protein	GFP	FEGDTLVNRIELK_2	Long	L_3	9	3	7	3.7	26.0687	QEP2_210813_AB_149
P42212;CON__Q9U6Y5	P42212	Green fluorescent protein	GFP	FEGDTLVNRIELK_3	Long	L_3	9	3	7	3.7	28.3572	QEP2_210813_AB_149
P42212;CON__Q9U6Y5	P42212	Green fluorescent protein	GFP	FICTTGK_2	Long	L_3	9	3	7	3.7	28.2716	QEP2_210813_AB_149
P42212;CON__Q9U6Y5	P42212	Green fluorescent protein	GFP	FSVSGEGEGDATYGK_2	Long	L_3	9	3	7	3.7	27.0716	QEP2_210813_AB_149
P42212;CON__Q9U6Y5	P42212	Green fluorescent protein	GFP	FSVSGEGEGDATYGKLTLK_2	Long	L_3	9	3	7	3.7	25.5342	QEP2_210813_AB_149
P42212;CON__Q9U6Y5	P42212	Green fluorescent protein	GFP	FSVSGEGEGDATYGKLTLK_3	Long	L_3	9	3	7	3.7	29.0767	QEP2_210813_AB_149
P42212;CON__Q9U6Y5	P42212	Green fluorescent protein	GFP	GEELFTGVVPILVELDGDVNGHK_3	Long	L_3	9	3	7	3.7	23.4566	QEP2_210813_AB_149
P42212;CON__Q9U6Y5	P42212	Green fluorescent protein	GFP	GIDFKEDGNILGHK_2	Long	L_3	9	3	7	3.7	23.9517	QEP2_210813_AB_149
P42212;CON__Q9U6Y5	P42212	Green fluorescent protein	GFP	GIDFKEDGNILGHK_3	Long	L_3	9	3	7	3.7	24.6759	QEP2_210813_AB_149
P42212;CON__Q9U6Y5	P42212	Green fluorescent protein	GFP	GIDFKEDGNILGHKLEYNYNSHNVYIMADK_4	Long	L_3	9	3	7	3.7	22.6639	QEP2_210813_AB_149
P42212;CON__Q9U6Y5	P42212	Green fluorescent protein	GFP	GIDFKEDGNILGHKLEYNYNSHNVYIMADK_5	Long	L_3	9	3	7	3.7	22.6267	QEP2_210813_AB_149
P42212;CON__Q9U6Y5	P42212	Green fluorescent protein	GFP	IELKGIDFKEDGNILGHK_3	Long	L_3	9	3	7	3.7	23.3905	QEP2_210813_AB_149
P42212;CON__Q9U6Y5	P42212	Green fluorescent protein	GFP	IELKGIDFKEDGNILGHK_4	Long	L_3	9	3	7	3.7	25.5539	QEP2_210813_AB_149
P42212;CON__Q9U6Y5	P42212	Green fluorescent protein	GFP	LEYNYNSHNVYIM(Oxidation (M))ADK_3	Long	L_3	9	3	7	3.7	NA	QEP2_210813_AB_149
P42212;CON__Q9U6Y5	P42212	Green fluorescent protein	GFP	LEYNYNSHNVYIM(Oxidation (M))ADKQK_3	Long	L_3	9	3	7	3.7	21.8193	QEP2_210813_AB_149
P42212;CON__Q9U6Y5	P42212	Green fluorescent protein	GFP	LEYNYNSHNVYIM(Oxidation (M))ADKQK_4	Long	L_3	9	3	7	3.7	24.2728	QEP2_210813_AB_149
P42212;CON__Q9U6Y5	P42212	Green fluorescent protein	GFP	LEYNYNSHNVYIMADK_2	Long	L_3	9	3	7	3.7	NA	QEP2_210813_AB_149
P42212;CON__Q9U6Y5	P42212	Green fluorescent protein	GFP	LEYNYNSHNVYIMADK_3	Long	L_3	9	3	7	3.7	24.8531	QEP2_210813_AB_149
P42212;CON__Q9U6Y5	P42212	Green fluorescent protein	GFP	LEYNYNSHNVYIMADKQK_2	Long	L_3	9	3	7	3.7	21.4931	QEP2_210813_AB_149
P42212;CON__Q9U6Y5	P42212	Green fluorescent protein	GFP	LEYNYNSHNVYIMADKQK_3	Long	L_3	9	3	7	3.7	26.6175	QEP2_210813_AB_149
P42212;CON__Q9U6Y5	P42212	Green fluorescent protein	GFP	LEYNYNSHNVYIMADKQK_4	Long	L_3	9	3	7	3.7	27.8595	QEP2_210813_AB_149
P42212;CON__Q9U6Y5	P42212	Green fluorescent protein	GFP	NGIKVNFK_2	Long	L_3	9	3	7	3.7	27.7176	QEP2_210813_AB_149
P42212;CON__Q9U6Y5	P42212	Green fluorescent protein	GFP	SAM(Oxidation (M))PEGYVQER_2	Long	L_3	9	3	7	3.7	28.6015	QEP2_210813_AB_149
P42212;CON__Q9U6Y5	P42212	Green fluorescent protein	GFP	SAMPEGYVQER_2	Long	L_3	9	3	7	3.7	30.8613	QEP2_210813_AB_149
P42212;CON__Q9U6Y5	P42212	Green fluorescent protein	GFP	TIFFKDDGNYK_2	Long	L_3	9	3	7	3.7	29.7404	QEP2_210813_AB_149
P42212;CON__Q9U6Y5	P42212	Green fluorescent protein	GFP	TIFFKDDGNYK_3	Long	L_3	9	3	7	3.7	30.5503	QEP2_210813_AB_149
P42212;CON__Q9U6Y5	P42212	Green fluorescent protein	GFP	TIFFKDDGNYKTR_2	Long	L_3	9	3	7	3.7	25.5395	QEP2_210813_AB_149
P42212;CON__Q9U6Y5	P42212	Green fluorescent protein	GFP	TIFFKDDGNYKTR_3	Long	L_3	9	3	7	3.7	30.0272	QEP2_210813_AB_149
P42212;CON__Q9U6Y5	P42212	Green fluorescent protein	GFP	TIFFKDDGNYKTR_4	Long	L_3	9	3	7	3.7	28.0124	QEP2_210813_AB_149
P42212;CON__Q9U6Y5	P42212	Green fluorescent protein	GFP	TRAEVKFEGDTLVNR_2	Long	L_3	9	3	7	3.7	22.2539	QEP2_210813_AB_149
P42212;CON__Q9U6Y5	P42212	Green fluorescent protein	GFP	TRAEVKFEGDTLVNR_3	Long	L_3	9	3	7	3.7	26.7238	QEP2_210813_AB_149
P42212;CON__Q9U6Y5	P42212	Green fluorescent protein	GFP	TRAEVKFEGDTLVNR_4	Long	L_3	9	3	7	3.7	24.4814	QEP2_210813_AB_149
P42212;CON__Q9U6Y5	P42212	Green fluorescent protein	GFP	YPDHM(Oxidation (M))KQHDFFK_3	Long	L_3	9	3	7	3.7	25.5925	QEP2_210813_AB_149
P42212;CON__Q9U6Y5	P42212	Green fluorescent protein	GFP	YPDHM(Oxidation (M))KQHDFFK_4	Long	L_3	9	3	7	3.7	25.5025	QEP2_210813_AB_149
P42212;CON__Q9U6Y5	P42212	Green fluorescent protein	GFP	YPDHMKQHDFFK_2	Long	L_3	9	3	7	3.7	21.3531	QEP2_210813_AB_149
P42212;CON__Q9U6Y5	P42212	Green fluorescent protein	GFP	YPDHMKQHDFFK_3	Long	L_3	9	3	7	3.7	26.3149	QEP2_210813_AB_149
Q14683	Q14683	Structural maintenance of chromosomes protein 1A	SMC1A	AATLAQELEK_2	Control	C_1	1	1	3	1.3	NA	QEP2_210813_AB_133
Q14683	Q14683	Structural maintenance of chromosomes protein 1A	SMC1A	AATLAQELEKFNR_3	Control	C_1	1	1	3	1.3	NA	QEP2_210813_AB_133
Q14683	Q14683	Structural maintenance of chromosomes protein 1A	SMC1A	ADQDRLDLEER_3	Control	C_1	1	1	3	1.3	NA	QEP2_210813_AB_133
Q14683	Q14683	Structural maintenance of chromosomes protein 1A	SMC1A	AFVSMVYSEEGAEDR_2	Control	C_1	1	1	3	1.3	NA	QEP2_210813_AB_133
Q14683	Q14683	Structural maintenance of chromosomes protein 1A	SMC1A	AFVSMVYSEEGAEDRTFAR_3	Control	C_1	1	1	3	1.3	NA	QEP2_210813_AB_133
Q14683	Q14683	Structural maintenance of chromosomes protein 1A	SMC1A	AQVQLQLFK_2	Control	C_1	1	1	3	1.3	NA	QEP2_210813_AB_133
Q14683	Q14683	Structural maintenance of chromosomes protein 1A	SMC1A	DKFQETSDEFEAAR_2	Control	C_1	1	1	3	1.3	NA	QEP2_210813_AB_133
Q14683	Q14683	Structural maintenance of chromosomes protein 1A	SMC1A	DKFQETSDEFEAAR_3	Control	C_1	1	1	3	1.3	NA	QEP2_210813_AB_133
Q14683	Q14683	Structural maintenance of chromosomes protein 1A	SMC1A	DLIHGAPVGKPAANR_3	Control	C_1	1	1	3	1.3	NA	QEP2_210813_AB_133
Q14683	Q14683	Structural maintenance of chromosomes protein 1A	SMC1A	DLTLEENQVKK_2	Control	C_1	1	1	3	1.3	NA	QEP2_210813_AB_133
Q14683	Q14683	Structural maintenance of chromosomes protein 1A	SMC1A	EMVKAEEDTQFNYHR_3	Control	C_1	1	1	3	1.3	NA	QEP2_210813_AB_133
Q14683	Q14683	Structural maintenance of chromosomes protein 1A	SMC1A	FRPMDNLSGGEK_2	Control	C_1	1	1	3	1.3	NA	QEP2_210813_AB_133
Q14683	Q14683	Structural maintenance of chromosomes protein 1A	SMC1A	FRPMDNLSGGEK_3	Control	C_1	1	1	3	1.3	NA	QEP2_210813_AB_133
Q14683	Q14683	Structural maintenance of chromosomes protein 1A	SMC1A	FTAIIGPNGSGK_2	Control	C_1	1	1	3	1.3	NA	QEP2_210813_AB_133
Q14683	Q14683	Structural maintenance of chromosomes protein 1A	SMC1A	GEPETFLPLDYLEVKPTDEK_3	Control	C_1	1	1	3	1.3	NA	QEP2_210813_AB_133
Q14683	Q14683	Structural maintenance of chromosomes protein 1A	SMC1A	GEPETFLPLDYLEVKPTDEKLR_3	Control	C_1	1	1	3	1.3	NA	QEP2_210813_AB_133
Q14683	Q14683	Structural maintenance of chromosomes protein 1A	SMC1A	GEPETFLPLDYLEVKPTDEKLR_4	Control	C_1	1	1	3	1.3	NA	QEP2_210813_AB_133
Q14683	Q14683	Structural maintenance of chromosomes protein 1A	SMC1A	GTMDDISQEEGSSQGEDSVSGSQR_3	Control	C_1	1	1	3	1.3	NA	QEP2_210813_AB_133
Q14683	Q14683	Structural maintenance of chromosomes protein 1A	SMC1A	HKTVALDGTLFQK_3	Control	C_1	1	1	3	1.3	NA	QEP2_210813_AB_133
Q14683	Q14683	Structural maintenance of chromosomes protein 1A	SMC1A	HLALNLQEK_2	Control	C_1	1	1	3	1.3	NA	QEP2_210813_AB_133
Q14683	Q14683	Structural maintenance of chromosomes protein 1A	SMC1A	IEKLEEYITTSK_2	Control	C_1	1	1	3	1.3	NA	QEP2_210813_AB_133
Q14683	Q14683	Structural maintenance of chromosomes protein 1A	SMC1A	IEKLEEYITTSK_3	Control	C_1	1	1	3	1.3	NA	QEP2_210813_AB_133
Q14683	Q14683	Structural maintenance of chromosomes protein 1A	SMC1A	IIDETMAQLQDLK_2	Control	C_1	1	1	3	1.3	NA	QEP2_210813_AB_133
Q14683	Q14683	Structural maintenance of chromosomes protein 1A	SMC1A	IIDETMAQLQDLKNQHLAK_3	Control	C_1	1	1	3	1.3	NA	QEP2_210813_AB_133
Q14683	Q14683	Structural maintenance of chromosomes protein 1A	SMC1A	IIDETMAQLQDLKNQHLAK_4	Control	C_1	1	1	3	1.3	NA	QEP2_210813_AB_133
Q14683	Q14683	Structural maintenance of chromosomes protein 1A	SMC1A	ISSIYAR_2	Control	C_1	1	1	3	1.3	NA	QEP2_210813_AB_133
Q14683	Q14683	Structural maintenance of chromosomes protein 1A	SMC1A	KAEIMESIKR_3	Control	C_1	1	1	3	1.3	NA	QEP2_210813_AB_133
Q14683	Q14683	Structural maintenance of chromosomes protein 1A	SMC1A	KSEVNDKNHEMEEIR_4	Control	C_1	1	1	3	1.3	NA	QEP2_210813_AB_133
Q14683	Q14683	Structural maintenance of chromosomes protein 1A	SMC1A	LGGANKEMTHLQK_3	Control	C_1	1	1	3	1.3	NA	QEP2_210813_AB_133
Q14683	Q14683	Structural maintenance of chromosomes protein 1A	SMC1A	LIEIENFK_2	Control	C_1	1	1	3	1.3	NA	QEP2_210813_AB_133
Q14683	Q14683	Structural maintenance of chromosomes protein 1A	SMC1A	LKDEVVR_2	Control	C_1	1	1	3	1.3	NA	QEP2_210813_AB_133
Q14683	Q14683	Structural maintenance of chromosomes protein 1A	SMC1A	LKYSQSDLEQTK_2	Control	C_1	1	1	3	1.3	NA	QEP2_210813_AB_133
Q14683	Q14683	Structural maintenance of chromosomes protein 1A	SMC1A	LKYSQSDLEQTK_3	Control	C_1	1	1	3	1.3	NA	QEP2_210813_AB_133
Q14683	Q14683	Structural maintenance of chromosomes protein 1A	SMC1A	LREIEENQK_2	Control	C_1	1	1	3	1.3	NA	QEP2_210813_AB_133
Q14683	Q14683	Structural maintenance of chromosomes protein 1A	SMC1A	LREIEENQKR_3	Control	C_1	1	1	3	1.3	NA	QEP2_210813_AB_133
Q14683	Q14683	Structural maintenance of chromosomes protein 1A	SMC1A	LTEELKEQMK_2	Control	C_1	1	1	3	1.3	NA	QEP2_210813_AB_133
Q14683	Q14683	Structural maintenance of chromosomes protein 1A	SMC1A	LTEELKEQMK_3	Control	C_1	1	1	3	1.3	NA	QEP2_210813_AB_133
Q14683	Q14683	Structural maintenance of chromosomes protein 1A	SMC1A	LYHNEVEIEK_2	Control	C_1	1	1	3	1.3	NA	QEP2_210813_AB_133
Q14683	Q14683	Structural maintenance of chromosomes protein 1A	SMC1A	LYHNEVEIEK_3	Control	C_1	1	1	3	1.3	NA	QEP2_210813_AB_133
Q14683	Q14683	Structural maintenance of chromosomes protein 1A	SMC1A	LYPGSVYGR_2	Control	C_1	1	1	3	1.3	NA	QEP2_210813_AB_133
Q14683	Q14683	Structural maintenance of chromosomes protein 1A	SMC1A	MEEESQSQGR_2	Control	C_1	1	1	3	1.3	NA	QEP2_210813_AB_133
Q14683	Q14683	Structural maintenance of chromosomes protein 1A	SMC1A	NFLVFQGAVESIAMKNPK_3	Control	C_1	1	1	3	1.3	NA	QEP2_210813_AB_133
Q14683	Q14683	Structural maintenance of chromosomes protein 1A	SMC1A	NIREFEEEKVK_3	Control	C_1	1	1	3	1.3	NA	QEP2_210813_AB_133
Q14683	Q14683	Structural maintenance of chromosomes protein 1A	SMC1A	NMDAIIVDSEK_2	Control	C_1	1	1	3	1.3	NA	QEP2_210813_AB_133
Q14683	Q14683	Structural maintenance of chromosomes protein 1A	SMC1A	NSSAQAFLGPENPEEPYLDGINYNCVAPGKR_3	Control	C_1	1	1	3	1.3	NA	QEP2_210813_AB_133
Q14683	Q14683	Structural maintenance of chromosomes protein 1A	SMC1A	QAFEQIKK_2	Control	C_1	1	1	3	1.3	NA	QEP2_210813_AB_133
Q14683	Q14683	Structural maintenance of chromosomes protein 1A	SMC1A	QIIGPFQR_2	Control	C_1	1	1	3	1.3	NA	QEP2_210813_AB_133
Q14683	Q14683	Structural maintenance of chromosomes protein 1A	SMC1A	QVQSQAHGLQMR_2	Control	C_1	1	1	3	1.3	NA	QEP2_210813_AB_133
Q14683	Q14683	Structural maintenance of chromosomes protein 1A	SMC1A	QVQSQAHGLQMR_3	Control	C_1	1	1	3	1.3	NA	QEP2_210813_AB_133
Q14683	Q14683	Structural maintenance of chromosomes protein 1A	SMC1A	RIDEINKELNQVMEQLGDAR_3	Control	C_1	1	1	3	1.3	NA	QEP2_210813_AB_133
Q14683	Q14683	Structural maintenance of chromosomes protein 1A	SMC1A	RIDEINKELNQVMEQLGDAR_4	Control	C_1	1	1	3	1.3	NA	QEP2_210813_AB_133
Q14683	Q14683	Structural maintenance of chromosomes protein 1A	SMC1A	SGELAQEYDKR_2	Control	C_1	1	1	3	1.3	NA	QEP2_210813_AB_133
Q14683	Q14683	Structural maintenance of chromosomes protein 1A	SMC1A	SKLESELANFGPR_2	Control	C_1	1	1	3	1.3	NA	QEP2_210813_AB_133
Q14683	Q14683	Structural maintenance of chromosomes protein 1A	SMC1A	SKLESELANFGPR_3	Control	C_1	1	1	3	1.3	NA	QEP2_210813_AB_133
Q14683	Q14683	Structural maintenance of chromosomes protein 1A	SMC1A	TALFEEISR_2	Control	C_1	1	1	3	1.3	NA	QEP2_210813_AB_133
Q14683	Q14683	Structural maintenance of chromosomes protein 1A	SMC1A	VIVGGSSEYKINNK_3	Control	C_1	1	1	3	1.3	NA	QEP2_210813_AB_133
Q14683	Q14683	Structural maintenance of chromosomes protein 1A	SMC1A	VLTFDLTKYPDANPNPNEQ_3	Control	C_1	1	1	3	1.3	NA	QEP2_210813_AB_133
Q14683	Q14683	Structural maintenance of chromosomes protein 1A	SMC1A	AATLAQELEK_2	Control	C_2	2	1	4	1.4	NA	QEP2_210813_AB_137
Q14683	Q14683	Structural maintenance of chromosomes protein 1A	SMC1A	AATLAQELEKFNR_3	Control	C_2	2	1	4	1.4	NA	QEP2_210813_AB_137
Q14683	Q14683	Structural maintenance of chromosomes protein 1A	SMC1A	ADQDRLDLEER_3	Control	C_2	2	1	4	1.4	NA	QEP2_210813_AB_137
Q14683	Q14683	Structural maintenance of chromosomes protein 1A	SMC1A	AFVSMVYSEEGAEDR_2	Control	C_2	2	1	4	1.4	NA	QEP2_210813_AB_137
Q14683	Q14683	Structural maintenance of chromosomes protein 1A	SMC1A	AFVSMVYSEEGAEDRTFAR_3	Control	C_2	2	1	4	1.4	NA	QEP2_210813_AB_137
Q14683	Q14683	Structural maintenance of chromosomes protein 1A	SMC1A	AQVQLQLFK_2	Control	C_2	2	1	4	1.4	NA	QEP2_210813_AB_137
Q14683	Q14683	Structural maintenance of chromosomes protein 1A	SMC1A	DKFQETSDEFEAAR_2	Control	C_2	2	1	4	1.4	NA	QEP2_210813_AB_137
Q14683	Q14683	Structural maintenance of chromosomes protein 1A	SMC1A	DKFQETSDEFEAAR_3	Control	C_2	2	1	4	1.4	NA	QEP2_210813_AB_137
Q14683	Q14683	Structural maintenance of chromosomes protein 1A	SMC1A	DLIHGAPVGKPAANR_3	Control	C_2	2	1	4	1.4	NA	QEP2_210813_AB_137
Q14683	Q14683	Structural maintenance of chromosomes protein 1A	SMC1A	DLTLEENQVKK_2	Control	C_2	2	1	4	1.4	NA	QEP2_210813_AB_137
Q14683	Q14683	Structural maintenance of chromosomes protein 1A	SMC1A	EMVKAEEDTQFNYHR_3	Control	C_2	2	1	4	1.4	NA	QEP2_210813_AB_137
Q14683	Q14683	Structural maintenance of chromosomes protein 1A	SMC1A	FRPMDNLSGGEK_2	Control	C_2	2	1	4	1.4	NA	QEP2_210813_AB_137
Q14683	Q14683	Structural maintenance of chromosomes protein 1A	SMC1A	FRPMDNLSGGEK_3	Control	C_2	2	1	4	1.4	NA	QEP2_210813_AB_137
Q14683	Q14683	Structural maintenance of chromosomes protein 1A	SMC1A	FTAIIGPNGSGK_2	Control	C_2	2	1	4	1.4	NA	QEP2_210813_AB_137
Q14683	Q14683	Structural maintenance of chromosomes protein 1A	SMC1A	GEPETFLPLDYLEVKPTDEK_3	Control	C_2	2	1	4	1.4	NA	QEP2_210813_AB_137
Q14683	Q14683	Structural maintenance of chromosomes protein 1A	SMC1A	GEPETFLPLDYLEVKPTDEKLR_3	Control	C_2	2	1	4	1.4	NA	QEP2_210813_AB_137
Q14683	Q14683	Structural maintenance of chromosomes protein 1A	SMC1A	GEPETFLPLDYLEVKPTDEKLR_4	Control	C_2	2	1	4	1.4	NA	QEP2_210813_AB_137
Q14683	Q14683	Structural maintenance of chromosomes protein 1A	SMC1A	GTMDDISQEEGSSQGEDSVSGSQR_3	Control	C_2	2	1	4	1.4	NA	QEP2_210813_AB_137
Q14683	Q14683	Structural maintenance of chromosomes protein 1A	SMC1A	HKTVALDGTLFQK_3	Control	C_2	2	1	4	1.4	NA	QEP2_210813_AB_137
Q14683	Q14683	Structural maintenance of chromosomes protein 1A	SMC1A	HLALNLQEK_2	Control	C_2	2	1	4	1.4	NA	QEP2_210813_AB_137
Q14683	Q14683	Structural maintenance of chromosomes protein 1A	SMC1A	IEKLEEYITTSK_2	Control	C_2	2	1	4	1.4	NA	QEP2_210813_AB_137
Q14683	Q14683	Structural maintenance of chromosomes protein 1A	SMC1A	IEKLEEYITTSK_3	Control	C_2	2	1	4	1.4	NA	QEP2_210813_AB_137
Q14683	Q14683	Structural maintenance of chromosomes protein 1A	SMC1A	IIDETMAQLQDLK_2	Control	C_2	2	1	4	1.4	NA	QEP2_210813_AB_137
Q14683	Q14683	Structural maintenance of chromosomes protein 1A	SMC1A	IIDETMAQLQDLKNQHLAK_3	Control	C_2	2	1	4	1.4	NA	QEP2_210813_AB_137
Q14683	Q14683	Structural maintenance of chromosomes protein 1A	SMC1A	IIDETMAQLQDLKNQHLAK_4	Control	C_2	2	1	4	1.4	NA	QEP2_210813_AB_137
Q14683	Q14683	Structural maintenance of chromosomes protein 1A	SMC1A	ISSIYAR_2	Control	C_2	2	1	4	1.4	NA	QEP2_210813_AB_137
Q14683	Q14683	Structural maintenance of chromosomes protein 1A	SMC1A	KAEIMESIKR_3	Control	C_2	2	1	4	1.4	NA	QEP2_210813_AB_137
Q14683	Q14683	Structural maintenance of chromosomes protein 1A	SMC1A	KSEVNDKNHEMEEIR_4	Control	C_2	2	1	4	1.4	NA	QEP2_210813_AB_137
Q14683	Q14683	Structural maintenance of chromosomes protein 1A	SMC1A	LGGANKEMTHLQK_3	Control	C_2	2	1	4	1.4	NA	QEP2_210813_AB_137
Q14683	Q14683	Structural maintenance of chromosomes protein 1A	SMC1A	LIEIENFK_2	Control	C_2	2	1	4	1.4	NA	QEP2_210813_AB_137
Q14683	Q14683	Structural maintenance of chromosomes protein 1A	SMC1A	LKDEVVR_2	Control	C_2	2	1	4	1.4	NA	QEP2_210813_AB_137
Q14683	Q14683	Structural maintenance of chromosomes protein 1A	SMC1A	LKYSQSDLEQTK_2	Control	C_2	2	1	4	1.4	NA	QEP2_210813_AB_137
Q14683	Q14683	Structural maintenance of chromosomes protein 1A	SMC1A	LKYSQSDLEQTK_3	Control	C_2	2	1	4	1.4	NA	QEP2_210813_AB_137
Q14683	Q14683	Structural maintenance of chromosomes protein 1A	SMC1A	LREIEENQK_2	Control	C_2	2	1	4	1.4	NA	QEP2_210813_AB_137
Q14683	Q14683	Structural maintenance of chromosomes protein 1A	SMC1A	LREIEENQKR_3	Control	C_2	2	1	4	1.4	NA	QEP2_210813_AB_137
Q14683	Q14683	Structural maintenance of chromosomes protein 1A	SMC1A	LTEELKEQMK_2	Control	C_2	2	1	4	1.4	NA	QEP2_210813_AB_137
Q14683	Q14683	Structural maintenance of chromosomes protein 1A	SMC1A	LTEELKEQMK_3	Control	C_2	2	1	4	1.4	NA	QEP2_210813_AB_137
Q14683	Q14683	Structural maintenance of chromosomes protein 1A	SMC1A	LYHNEVEIEK_2	Control	C_2	2	1	4	1.4	NA	QEP2_210813_AB_137
Q14683	Q14683	Structural maintenance of chromosomes protein 1A	SMC1A	LYHNEVEIEK_3	Control	C_2	2	1	4	1.4	NA	QEP2_210813_AB_137
Q14683	Q14683	Structural maintenance of chromosomes protein 1A	SMC1A	LYPGSVYGR_2	Control	C_2	2	1	4	1.4	NA	QEP2_210813_AB_137
Q14683	Q14683	Structural maintenance of chromosomes protein 1A	SMC1A	MEEESQSQGR_2	Control	C_2	2	1	4	1.4	NA	QEP2_210813_AB_137
Q14683	Q14683	Structural maintenance of chromosomes protein 1A	SMC1A	NFLVFQGAVESIAMKNPK_3	Control	C_2	2	1	4	1.4	NA	QEP2_210813_AB_137
Q14683	Q14683	Structural maintenance of chromosomes protein 1A	SMC1A	NIREFEEEKVK_3	Control	C_2	2	1	4	1.4	NA	QEP2_210813_AB_137
Q14683	Q14683	Structural maintenance of chromosomes protein 1A	SMC1A	NMDAIIVDSEK_2	Control	C_2	2	1	4	1.4	NA	QEP2_210813_AB_137
Q14683	Q14683	Structural maintenance of chromosomes protein 1A	SMC1A	NSSAQAFLGPENPEEPYLDGINYNCVAPGKR_3	Control	C_2	2	1	4	1.4	NA	QEP2_210813_AB_137
Q14683	Q14683	Structural maintenance of chromosomes protein 1A	SMC1A	QAFEQIKK_2	Control	C_2	2	1	4	1.4	NA	QEP2_210813_AB_137
Q14683	Q14683	Structural maintenance of chromosomes protein 1A	SMC1A	QIIGPFQR_2	Control	C_2	2	1	4	1.4	NA	QEP2_210813_AB_137
Q14683	Q14683	Structural maintenance of chromosomes protein 1A	SMC1A	QVQSQAHGLQMR_2	Control	C_2	2	1	4	1.4	NA	QEP2_210813_AB_137
Q14683	Q14683	Structural maintenance of chromosomes protein 1A	SMC1A	QVQSQAHGLQMR_3	Control	C_2	2	1	4	1.4	NA	QEP2_210813_AB_137
Q14683	Q14683	Structural maintenance of chromosomes protein 1A	SMC1A	RIDEINKELNQVMEQLGDAR_3	Control	C_2	2	1	4	1.4	NA	QEP2_210813_AB_137
Q14683	Q14683	Structural maintenance of chromosomes protein 1A	SMC1A	RIDEINKELNQVMEQLGDAR_4	Control	C_2	2	1	4	1.4	NA	QEP2_210813_AB_137
Q14683	Q14683	Structural maintenance of chromosomes protein 1A	SMC1A	SGELAQEYDKR_2	Control	C_2	2	1	4	1.4	NA	QEP2_210813_AB_137
Q14683	Q14683	Structural maintenance of chromosomes protein 1A	SMC1A	SKLESELANFGPR_2	Control	C_2	2	1	4	1.4	NA	QEP2_210813_AB_137
Q14683	Q14683	Structural maintenance of chromosomes protein 1A	SMC1A	SKLESELANFGPR_3	Control	C_2	2	1	4	1.4	NA	QEP2_210813_AB_137
Q14683	Q14683	Structural maintenance of chromosomes protein 1A	SMC1A	TALFEEISR_2	Control	C_2	2	1	4	1.4	NA	QEP2_210813_AB_137
Q14683	Q14683	Structural maintenance of chromosomes protein 1A	SMC1A	VIVGGSSEYKINNK_3	Control	C_2	2	1	4	1.4	NA	QEP2_210813_AB_137
Q14683	Q14683	Structural maintenance of chromosomes protein 1A	SMC1A	VLTFDLTKYPDANPNPNEQ_3	Control	C_2	2	1	4	1.4	NA	QEP2_210813_AB_137
Q14683	Q14683	Structural maintenance of chromosomes protein 1A	SMC1A	AATLAQELEK_2	Control	C_3	3	1	8	1.8	NA	QEP2_210813_AB_153
Q14683	Q14683	Structural maintenance of chromosomes protein 1A	SMC1A	AATLAQELEKFNR_3	Control	C_3	3	1	8	1.8	NA	QEP2_210813_AB_153
Q14683	Q14683	Structural maintenance of chromosomes protein 1A	SMC1A	ADQDRLDLEER_3	Control	C_3	3	1	8	1.8	NA	QEP2_210813_AB_153
Q14683	Q14683	Structural maintenance of chromosomes protein 1A	SMC1A	AFVSMVYSEEGAEDR_2	Control	C_3	3	1	8	1.8	NA	QEP2_210813_AB_153
Q14683	Q14683	Structural maintenance of chromosomes protein 1A	SMC1A	AFVSMVYSEEGAEDRTFAR_3	Control	C_3	3	1	8	1.8	NA	QEP2_210813_AB_153
Q14683	Q14683	Structural maintenance of chromosomes protein 1A	SMC1A	AQVQLQLFK_2	Control	C_3	3	1	8	1.8	NA	QEP2_210813_AB_153
Q14683	Q14683	Structural maintenance of chromosomes protein 1A	SMC1A	DKFQETSDEFEAAR_2	Control	C_3	3	1	8	1.8	NA	QEP2_210813_AB_153
Q14683	Q14683	Structural maintenance of chromosomes protein 1A	SMC1A	DKFQETSDEFEAAR_3	Control	C_3	3	1	8	1.8	NA	QEP2_210813_AB_153
Q14683	Q14683	Structural maintenance of chromosomes protein 1A	SMC1A	DLIHGAPVGKPAANR_3	Control	C_3	3	1	8	1.8	NA	QEP2_210813_AB_153
Q14683	Q14683	Structural maintenance of chromosomes protein 1A	SMC1A	DLTLEENQVKK_2	Control	C_3	3	1	8	1.8	NA	QEP2_210813_AB_153
Q14683	Q14683	Structural maintenance of chromosomes protein 1A	SMC1A	EMVKAEEDTQFNYHR_3	Control	C_3	3	1	8	1.8	NA	QEP2_210813_AB_153
Q14683	Q14683	Structural maintenance of chromosomes protein 1A	SMC1A	FRPMDNLSGGEK_2	Control	C_3	3	1	8	1.8	NA	QEP2_210813_AB_153
Q14683	Q14683	Structural maintenance of chromosomes protein 1A	SMC1A	FRPMDNLSGGEK_3	Control	C_3	3	1	8	1.8	NA	QEP2_210813_AB_153
Q14683	Q14683	Structural maintenance of chromosomes protein 1A	SMC1A	FTAIIGPNGSGK_2	Control	C_3	3	1	8	1.8	NA	QEP2_210813_AB_153
Q14683	Q14683	Structural maintenance of chromosomes protein 1A	SMC1A	GEPETFLPLDYLEVKPTDEK_3	Control	C_3	3	1	8	1.8	NA	QEP2_210813_AB_153
Q14683	Q14683	Structural maintenance of chromosomes protein 1A	SMC1A	GEPETFLPLDYLEVKPTDEKLR_3	Control	C_3	3	1	8	1.8	NA	QEP2_210813_AB_153
Q14683	Q14683	Structural maintenance of chromosomes protein 1A	SMC1A	GEPETFLPLDYLEVKPTDEKLR_4	Control	C_3	3	1	8	1.8	NA	QEP2_210813_AB_153
Q14683	Q14683	Structural maintenance of chromosomes protein 1A	SMC1A	GTMDDISQEEGSSQGEDSVSGSQR_3	Control	C_3	3	1	8	1.8	NA	QEP2_210813_AB_153
Q14683	Q14683	Structural maintenance of chromosomes protein 1A	SMC1A	HKTVALDGTLFQK_3	Control	C_3	3	1	8	1.8	NA	QEP2_210813_AB_153
Q14683	Q14683	Structural maintenance of chromosomes protein 1A	SMC1A	HLALNLQEK_2	Control	C_3	3	1	8	1.8	NA	QEP2_210813_AB_153
Q14683	Q14683	Structural maintenance of chromosomes protein 1A	SMC1A	IEKLEEYITTSK_2	Control	C_3	3	1	8	1.8	NA	QEP2_210813_AB_153
Q14683	Q14683	Structural maintenance of chromosomes protein 1A	SMC1A	IEKLEEYITTSK_3	Control	C_3	3	1	8	1.8	NA	QEP2_210813_AB_153
Q14683	Q14683	Structural maintenance of chromosomes protein 1A	SMC1A	IIDETMAQLQDLK_2	Control	C_3	3	1	8	1.8	NA	QEP2_210813_AB_153
Q14683	Q14683	Structural maintenance of chromosomes protein 1A	SMC1A	IIDETMAQLQDLKNQHLAK_3	Control	C_3	3	1	8	1.8	NA	QEP2_210813_AB_153
Q14683	Q14683	Structural maintenance of chromosomes protein 1A	SMC1A	IIDETMAQLQDLKNQHLAK_4	Control	C_3	3	1	8	1.8	NA	QEP2_210813_AB_153
Q14683	Q14683	Structural maintenance of chromosomes protein 1A	SMC1A	ISSIYAR_2	Control	C_3	3	1	8	1.8	NA	QEP2_210813_AB_153
Q14683	Q14683	Structural maintenance of chromosomes protein 1A	SMC1A	KAEIMESIKR_3	Control	C_3	3	1	8	1.8	NA	QEP2_210813_AB_153
Q14683	Q14683	Structural maintenance of chromosomes protein 1A	SMC1A	KSEVNDKNHEMEEIR_4	Control	C_3	3	1	8	1.8	NA	QEP2_210813_AB_153
Q14683	Q14683	Structural maintenance of chromosomes protein 1A	SMC1A	LGGANKEMTHLQK_3	Control	C_3	3	1	8	1.8	NA	QEP2_210813_AB_153
Q14683	Q14683	Structural maintenance of chromosomes protein 1A	SMC1A	LIEIENFK_2	Control	C_3	3	1	8	1.8	NA	QEP2_210813_AB_153
Q14683	Q14683	Structural maintenance of chromosomes protein 1A	SMC1A	LKDEVVR_2	Control	C_3	3	1	8	1.8	NA	QEP2_210813_AB_153
Q14683	Q14683	Structural maintenance of chromosomes protein 1A	SMC1A	LKYSQSDLEQTK_2	Control	C_3	3	1	8	1.8	NA	QEP2_210813_AB_153
Q14683	Q14683	Structural maintenance of chromosomes protein 1A	SMC1A	LKYSQSDLEQTK_3	Control	C_3	3	1	8	1.8	NA	QEP2_210813_AB_153
Q14683	Q14683	Structural maintenance of chromosomes protein 1A	SMC1A	LREIEENQK_2	Control	C_3	3	1	8	1.8	NA	QEP2_210813_AB_153
Q14683	Q14683	Structural maintenance of chromosomes protein 1A	SMC1A	LREIEENQKR_3	Control	C_3	3	1	8	1.8	NA	QEP2_210813_AB_153
Q14683	Q14683	Structural maintenance of chromosomes protein 1A	SMC1A	LTEELKEQMK_2	Control	C_3	3	1	8	1.8	NA	QEP2_210813_AB_153
Q14683	Q14683	Structural maintenance of chromosomes protein 1A	SMC1A	LTEELKEQMK_3	Control	C_3	3	1	8	1.8	NA	QEP2_210813_AB_153
Q14683	Q14683	Structural maintenance of chromosomes protein 1A	SMC1A	LYHNEVEIEK_2	Control	C_3	3	1	8	1.8	NA	QEP2_210813_AB_153
Q14683	Q14683	Structural maintenance of chromosomes protein 1A	SMC1A	LYHNEVEIEK_3	Control	C_3	3	1	8	1.8	NA	QEP2_210813_AB_153
Q14683	Q14683	Structural maintenance of chromosomes protein 1A	SMC1A	LYPGSVYGR_2	Control	C_3	3	1	8	1.8	NA	QEP2_210813_AB_153
Q14683	Q14683	Structural maintenance of chromosomes protein 1A	SMC1A	MEEESQSQGR_2	Control	C_3	3	1	8	1.8	NA	QEP2_210813_AB_153
Q14683	Q14683	Structural maintenance of chromosomes protein 1A	SMC1A	NFLVFQGAVESIAMKNPK_3	Control	C_3	3	1	8	1.8	NA	QEP2_210813_AB_153
Q14683	Q14683	Structural maintenance of chromosomes protein 1A	SMC1A	NIREFEEEKVK_3	Control	C_3	3	1	8	1.8	NA	QEP2_210813_AB_153
Q14683	Q14683	Structural maintenance of chromosomes protein 1A	SMC1A	NMDAIIVDSEK_2	Control	C_3	3	1	8	1.8	NA	QEP2_210813_AB_153
Q14683	Q14683	Structural maintenance of chromosomes protein 1A	SMC1A	NSSAQAFLGPENPEEPYLDGINYNCVAPGKR_3	Control	C_3	3	1	8	1.8	NA	QEP2_210813_AB_153
Q14683	Q14683	Structural maintenance of chromosomes protein 1A	SMC1A	QAFEQIKK_2	Control	C_3	3	1	8	1.8	NA	QEP2_210813_AB_153
Q14683	Q14683	Structural maintenance of chromosomes protein 1A	SMC1A	QIIGPFQR_2	Control	C_3	3	1	8	1.8	NA	QEP2_210813_AB_153
Q14683	Q14683	Structural maintenance of chromosomes protein 1A	SMC1A	QVQSQAHGLQMR_2	Control	C_3	3	1	8	1.8	NA	QEP2_210813_AB_153
Q14683	Q14683	Structural maintenance of chromosomes protein 1A	SMC1A	QVQSQAHGLQMR_3	Control	C_3	3	1	8	1.8	NA	QEP2_210813_AB_153
Q14683	Q14683	Structural maintenance of chromosomes protein 1A	SMC1A	RIDEINKELNQVMEQLGDAR_3	Control	C_3	3	1	8	1.8	NA	QEP2_210813_AB_153
Q14683	Q14683	Structural maintenance of chromosomes protein 1A	SMC1A	RIDEINKELNQVMEQLGDAR_4	Control	C_3	3	1	8	1.8	NA	QEP2_210813_AB_153
Q14683	Q14683	Structural maintenance of chromosomes protein 1A	SMC1A	SGELAQEYDKR_2	Control	C_3	3	1	8	1.8	NA	QEP2_210813_AB_153
Q14683	Q14683	Structural maintenance of chromosomes protein 1A	SMC1A	SKLESELANFGPR_2	Control	C_3	3	1	8	1.8	NA	QEP2_210813_AB_153
Q14683	Q14683	Structural maintenance of chromosomes protein 1A	SMC1A	SKLESELANFGPR_3	Control	C_3	3	1	8	1.8	NA	QEP2_210813_AB_153
Q14683	Q14683	Structural maintenance of chromosomes protein 1A	SMC1A	TALFEEISR_2	Control	C_3	3	1	8	1.8	NA	QEP2_210813_AB_153
Q14683	Q14683	Structural maintenance of chromosomes protein 1A	SMC1A	VIVGGSSEYKINNK_3	Control	C_3	3	1	8	1.8	NA	QEP2_210813_AB_153
Q14683	Q14683	Structural maintenance of chromosomes protein 1A	SMC1A	VLTFDLTKYPDANPNPNEQ_3	Control	C_3	3	1	8	1.8	NA	QEP2_210813_AB_153
Q14683	Q14683	Structural maintenance of chromosomes protein 1A	SMC1A	AATLAQELEK_2	Short	S_1	4	2	1	2.1	22.3782	QEP2_210813_AB_125
Q14683	Q14683	Structural maintenance of chromosomes protein 1A	SMC1A	AATLAQELEKFNR_3	Short	S_1	4	2	1	2.1	NA	QEP2_210813_AB_125
Q14683	Q14683	Structural maintenance of chromosomes protein 1A	SMC1A	ADQDRLDLEER_3	Short	S_1	4	2	1	2.1	21.76	QEP2_210813_AB_125
Q14683	Q14683	Structural maintenance of chromosomes protein 1A	SMC1A	AFVSMVYSEEGAEDR_2	Short	S_1	4	2	1	2.1	20.6	QEP2_210813_AB_125
Q14683	Q14683	Structural maintenance of chromosomes protein 1A	SMC1A	AFVSMVYSEEGAEDRTFAR_3	Short	S_1	4	2	1	2.1	NA	QEP2_210813_AB_125
Q14683	Q14683	Structural maintenance of chromosomes protein 1A	SMC1A	AQVQLQLFK_2	Short	S_1	4	2	1	2.1	21.9387	QEP2_210813_AB_125
Q14683	Q14683	Structural maintenance of chromosomes protein 1A	SMC1A	DKFQETSDEFEAAR_2	Short	S_1	4	2	1	2.1	NA	QEP2_210813_AB_125
Q14683	Q14683	Structural maintenance of chromosomes protein 1A	SMC1A	DKFQETSDEFEAAR_3	Short	S_1	4	2	1	2.1	22.1266	QEP2_210813_AB_125
Q14683	Q14683	Structural maintenance of chromosomes protein 1A	SMC1A	DLIHGAPVGKPAANR_3	Short	S_1	4	2	1	2.1	21.8212	QEP2_210813_AB_125
Q14683	Q14683	Structural maintenance of chromosomes protein 1A	SMC1A	DLTLEENQVKK_2	Short	S_1	4	2	1	2.1	NA	QEP2_210813_AB_125
Q14683	Q14683	Structural maintenance of chromosomes protein 1A	SMC1A	EMVKAEEDTQFNYHR_3	Short	S_1	4	2	1	2.1	NA	QEP2_210813_AB_125
Q14683	Q14683	Structural maintenance of chromosomes protein 1A	SMC1A	FRPMDNLSGGEK_2	Short	S_1	4	2	1	2.1	NA	QEP2_210813_AB_125
Q14683	Q14683	Structural maintenance of chromosomes protein 1A	SMC1A	FRPMDNLSGGEK_3	Short	S_1	4	2	1	2.1	20.8435	QEP2_210813_AB_125
Q14683	Q14683	Structural maintenance of chromosomes protein 1A	SMC1A	FTAIIGPNGSGK_2	Short	S_1	4	2	1	2.1	NA	QEP2_210813_AB_125
Q14683	Q14683	Structural maintenance of chromosomes protein 1A	SMC1A	GEPETFLPLDYLEVKPTDEK_3	Short	S_1	4	2	1	2.1	20.9636	QEP2_210813_AB_125
Q14683	Q14683	Structural maintenance of chromosomes protein 1A	SMC1A	GEPETFLPLDYLEVKPTDEKLR_3	Short	S_1	4	2	1	2.1	NA	QEP2_210813_AB_125
Q14683	Q14683	Structural maintenance of chromosomes protein 1A	SMC1A	GEPETFLPLDYLEVKPTDEKLR_4	Short	S_1	4	2	1	2.1	21.6268	QEP2_210813_AB_125
Q14683	Q14683	Structural maintenance of chromosomes protein 1A	SMC1A	GTMDDISQEEGSSQGEDSVSGSQR_3	Short	S_1	4	2	1	2.1	NA	QEP2_210813_AB_125
Q14683	Q14683	Structural maintenance of chromosomes protein 1A	SMC1A	HKTVALDGTLFQK_3	Short	S_1	4	2	1	2.1	NA	QEP2_210813_AB_125
Q14683	Q14683	Structural maintenance of chromosomes protein 1A	SMC1A	HLALNLQEK_2	Short	S_1	4	2	1	2.1	NA	QEP2_210813_AB_125
Q14683	Q14683	Structural maintenance of chromosomes protein 1A	SMC1A	IEKLEEYITTSK_2	Short	S_1	4	2	1	2.1	19.4828	QEP2_210813_AB_125
Q14683	Q14683	Structural maintenance of chromosomes protein 1A	SMC1A	IEKLEEYITTSK_3	Short	S_1	4	2	1	2.1	20.912	QEP2_210813_AB_125
Q14683	Q14683	Structural maintenance of chromosomes protein 1A	SMC1A	IIDETMAQLQDLK_2	Short	S_1	4	2	1	2.1	21.1686	QEP2_210813_AB_125
Q14683	Q14683	Structural maintenance of chromosomes protein 1A	SMC1A	IIDETMAQLQDLKNQHLAK_3	Short	S_1	4	2	1	2.1	NA	QEP2_210813_AB_125
Q14683	Q14683	Structural maintenance of chromosomes protein 1A	SMC1A	IIDETMAQLQDLKNQHLAK_4	Short	S_1	4	2	1	2.1	NA	QEP2_210813_AB_125
Q14683	Q14683	Structural maintenance of chromosomes protein 1A	SMC1A	ISSIYAR_2	Short	S_1	4	2	1	2.1	NA	QEP2_210813_AB_125
Q14683	Q14683	Structural maintenance of chromosomes protein 1A	SMC1A	KAEIMESIKR_3	Short	S_1	4	2	1	2.1	NA	QEP2_210813_AB_125
Q14683	Q14683	Structural maintenance of chromosomes protein 1A	SMC1A	KSEVNDKNHEMEEIR_4	Short	S_1	4	2	1	2.1	NA	QEP2_210813_AB_125
Q14683	Q14683	Structural maintenance of chromosomes protein 1A	SMC1A	LGGANKEMTHLQK_3	Short	S_1	4	2	1	2.1	NA	QEP2_210813_AB_125
Q14683	Q14683	Structural maintenance of chromosomes protein 1A	SMC1A	LIEIENFK_2	Short	S_1	4	2	1	2.1	21.5009	QEP2_210813_AB_125
Q14683	Q14683	Structural maintenance of chromosomes protein 1A	SMC1A	LKDEVVR_2	Short	S_1	4	2	1	2.1	NA	QEP2_210813_AB_125
Q14683	Q14683	Structural maintenance of chromosomes protein 1A	SMC1A	LKYSQSDLEQTK_2	Short	S_1	4	2	1	2.1	NA	QEP2_210813_AB_125
Q14683	Q14683	Structural maintenance of chromosomes protein 1A	SMC1A	LKYSQSDLEQTK_3	Short	S_1	4	2	1	2.1	NA	QEP2_210813_AB_125
Q14683	Q14683	Structural maintenance of chromosomes protein 1A	SMC1A	LREIEENQK_2	Short	S_1	4	2	1	2.1	NA	QEP2_210813_AB_125
Q14683	Q14683	Structural maintenance of chromosomes protein 1A	SMC1A	LREIEENQKR_3	Short	S_1	4	2	1	2.1	NA	QEP2_210813_AB_125
Q14683	Q14683	Structural maintenance of chromosomes protein 1A	SMC1A	LTEELKEQMK_2	Short	S_1	4	2	1	2.1	22.0629	QEP2_210813_AB_125
Q14683	Q14683	Structural maintenance of chromosomes protein 1A	SMC1A	LTEELKEQMK_3	Short	S_1	4	2	1	2.1	20.8327	QEP2_210813_AB_125
Q14683	Q14683	Structural maintenance of chromosomes protein 1A	SMC1A	LYHNEVEIEK_2	Short	S_1	4	2	1	2.1	21.0845	QEP2_210813_AB_125
Q14683	Q14683	Structural maintenance of chromosomes protein 1A	SMC1A	LYHNEVEIEK_3	Short	S_1	4	2	1	2.1	21.7955	QEP2_210813_AB_125
Q14683	Q14683	Structural maintenance of chromosomes protein 1A	SMC1A	LYPGSVYGR_2	Short	S_1	4	2	1	2.1	NA	QEP2_210813_AB_125
Q14683	Q14683	Structural maintenance of chromosomes protein 1A	SMC1A	MEEESQSQGR_2	Short	S_1	4	2	1	2.1	19.1712	QEP2_210813_AB_125
Q14683	Q14683	Structural maintenance of chromosomes protein 1A	SMC1A	NFLVFQGAVESIAMKNPK_3	Short	S_1	4	2	1	2.1	NA	QEP2_210813_AB_125
Q14683	Q14683	Structural maintenance of chromosomes protein 1A	SMC1A	NIREFEEEKVK_3	Short	S_1	4	2	1	2.1	NA	QEP2_210813_AB_125
Q14683	Q14683	Structural maintenance of chromosomes protein 1A	SMC1A	NMDAIIVDSEK_2	Short	S_1	4	2	1	2.1	22.1671	QEP2_210813_AB_125
Q14683	Q14683	Structural maintenance of chromosomes protein 1A	SMC1A	NSSAQAFLGPENPEEPYLDGINYNCVAPGKR_3	Short	S_1	4	2	1	2.1	NA	QEP2_210813_AB_125
Q14683	Q14683	Structural maintenance of chromosomes protein 1A	SMC1A	QAFEQIKK_2	Short	S_1	4	2	1	2.1	NA	QEP2_210813_AB_125
Q14683	Q14683	Structural maintenance of chromosomes protein 1A	SMC1A	QIIGPFQR_2	Short	S_1	4	2	1	2.1	NA	QEP2_210813_AB_125
Q14683	Q14683	Structural maintenance of chromosomes protein 1A	SMC1A	QVQSQAHGLQMR_2	Short	S_1	4	2	1	2.1	22.0018	QEP2_210813_AB_125
Q14683	Q14683	Structural maintenance of chromosomes protein 1A	SMC1A	QVQSQAHGLQMR_3	Short	S_1	4	2	1	2.1	NA	QEP2_210813_AB_125
Q14683	Q14683	Structural maintenance of chromosomes protein 1A	SMC1A	RIDEINKELNQVMEQLGDAR_3	Short	S_1	4	2	1	2.1	NA	QEP2_210813_AB_125
Q14683	Q14683	Structural maintenance of chromosomes protein 1A	SMC1A	RIDEINKELNQVMEQLGDAR_4	Short	S_1	4	2	1	2.1	NA	QEP2_210813_AB_125
Q14683	Q14683	Structural maintenance of chromosomes protein 1A	SMC1A	SGELAQEYDKR_2	Short	S_1	4	2	1	2.1	21.6742	QEP2_210813_AB_125
Q14683	Q14683	Structural maintenance of chromosomes protein 1A	SMC1A	SKLESELANFGPR_2	Short	S_1	4	2	1	2.1	21.1147	QEP2_210813_AB_125
Q14683	Q14683	Structural maintenance of chromosomes protein 1A	SMC1A	SKLESELANFGPR_3	Short	S_1	4	2	1	2.1	21.0874	QEP2_210813_AB_125
Q14683	Q14683	Structural maintenance of chromosomes protein 1A	SMC1A	TALFEEISR_2	Short	S_1	4	2	1	2.1	21.5311	QEP2_210813_AB_125
Q14683	Q14683	Structural maintenance of chromosomes protein 1A	SMC1A	VIVGGSSEYKINNK_3	Short	S_1	4	2	1	2.1	NA	QEP2_210813_AB_125
Q14683	Q14683	Structural maintenance of chromosomes protein 1A	SMC1A	VLTFDLTKYPDANPNPNEQ_3	Short	S_1	4	2	1	2.1	NA	QEP2_210813_AB_125
Q14683	Q14683	Structural maintenance of chromosomes protein 1A	SMC1A	AATLAQELEK_2	Short	S_2	5	2	6	2.6	NA	QEP2_210813_AB_145
Q14683	Q14683	Structural maintenance of chromosomes protein 1A	SMC1A	AATLAQELEKFNR_3	Short	S_2	5	2	6	2.6	21.2128	QEP2_210813_AB_145
Q14683	Q14683	Structural maintenance of chromosomes protein 1A	SMC1A	ADQDRLDLEER_3	Short	S_2	5	2	6	2.6	21.2642	QEP2_210813_AB_145
Q14683	Q14683	Structural maintenance of chromosomes protein 1A	SMC1A	AFVSMVYSEEGAEDR_2	Short	S_2	5	2	6	2.6	NA	QEP2_210813_AB_145
Q14683	Q14683	Structural maintenance of chromosomes protein 1A	SMC1A	AFVSMVYSEEGAEDRTFAR_3	Short	S_2	5	2	6	2.6	22.4569	QEP2_210813_AB_145
Q14683	Q14683	Structural maintenance of chromosomes protein 1A	SMC1A	AQVQLQLFK_2	Short	S_2	5	2	6	2.6	23.4278	QEP2_210813_AB_145
Q14683	Q14683	Structural maintenance of chromosomes protein 1A	SMC1A	DKFQETSDEFEAAR_2	Short	S_2	5	2	6	2.6	20.1047	QEP2_210813_AB_145
Q14683	Q14683	Structural maintenance of chromosomes protein 1A	SMC1A	DKFQETSDEFEAAR_3	Short	S_2	5	2	6	2.6	21.9724	QEP2_210813_AB_145
Q14683	Q14683	Structural maintenance of chromosomes protein 1A	SMC1A	DLIHGAPVGKPAANR_3	Short	S_2	5	2	6	2.6	NA	QEP2_210813_AB_145
Q14683	Q14683	Structural maintenance of chromosomes protein 1A	SMC1A	DLTLEENQVKK_2	Short	S_2	5	2	6	2.6	NA	QEP2_210813_AB_145
Q14683	Q14683	Structural maintenance of chromosomes protein 1A	SMC1A	EMVKAEEDTQFNYHR_3	Short	S_2	5	2	6	2.6	20.8349	QEP2_210813_AB_145
Q14683	Q14683	Structural maintenance of chromosomes protein 1A	SMC1A	FRPMDNLSGGEK_2	Short	S_2	5	2	6	2.6	20.8832	QEP2_210813_AB_145
Q14683	Q14683	Structural maintenance of chromosomes protein 1A	SMC1A	FRPMDNLSGGEK_3	Short	S_2	5	2	6	2.6	21.2122	QEP2_210813_AB_145
Q14683	Q14683	Structural maintenance of chromosomes protein 1A	SMC1A	FTAIIGPNGSGK_2	Short	S_2	5	2	6	2.6	20.8962	QEP2_210813_AB_145
Q14683	Q14683	Structural maintenance of chromosomes protein 1A	SMC1A	GEPETFLPLDYLEVKPTDEK_3	Short	S_2	5	2	6	2.6	NA	QEP2_210813_AB_145
Q14683	Q14683	Structural maintenance of chromosomes protein 1A	SMC1A	GEPETFLPLDYLEVKPTDEKLR_3	Short	S_2	5	2	6	2.6	NA	QEP2_210813_AB_145
Q14683	Q14683	Structural maintenance of chromosomes protein 1A	SMC1A	GEPETFLPLDYLEVKPTDEKLR_4	Short	S_2	5	2	6	2.6	21.6578	QEP2_210813_AB_145
Q14683	Q14683	Structural maintenance of chromosomes protein 1A	SMC1A	GTMDDISQEEGSSQGEDSVSGSQR_3	Short	S_2	5	2	6	2.6	21.4353	QEP2_210813_AB_145
Q14683	Q14683	Structural maintenance of chromosomes protein 1A	SMC1A	HKTVALDGTLFQK_3	Short	S_2	5	2	6	2.6	22.474	QEP2_210813_AB_145
Q14683	Q14683	Structural maintenance of chromosomes protein 1A	SMC1A	HLALNLQEK_2	Short	S_2	5	2	6	2.6	23.377	QEP2_210813_AB_145
Q14683	Q14683	Structural maintenance of chromosomes protein 1A	SMC1A	IEKLEEYITTSK_2	Short	S_2	5	2	6	2.6	20.7723	QEP2_210813_AB_145
Q14683	Q14683	Structural maintenance of chromosomes protein 1A	SMC1A	IEKLEEYITTSK_3	Short	S_2	5	2	6	2.6	21.4826	QEP2_210813_AB_145
Q14683	Q14683	Structural maintenance of chromosomes protein 1A	SMC1A	IIDETMAQLQDLK_2	Short	S_2	5	2	6	2.6	NA	QEP2_210813_AB_145
Q14683	Q14683	Structural maintenance of chromosomes protein 1A	SMC1A	IIDETMAQLQDLKNQHLAK_3	Short	S_2	5	2	6	2.6	22.5891	QEP2_210813_AB_145
Q14683	Q14683	Structural maintenance of chromosomes protein 1A	SMC1A	IIDETMAQLQDLKNQHLAK_4	Short	S_2	5	2	6	2.6	23.303	QEP2_210813_AB_145
Q14683	Q14683	Structural maintenance of chromosomes protein 1A	SMC1A	ISSIYAR_2	Short	S_2	5	2	6	2.6	23.8925	QEP2_210813_AB_145
Q14683	Q14683	Structural maintenance of chromosomes protein 1A	SMC1A	KAEIMESIKR_3	Short	S_2	5	2	6	2.6	21.5576	QEP2_210813_AB_145
Q14683	Q14683	Structural maintenance of chromosomes protein 1A	SMC1A	KSEVNDKNHEMEEIR_4	Short	S_2	5	2	6	2.6	NA	QEP2_210813_AB_145
Q14683	Q14683	Structural maintenance of chromosomes protein 1A	SMC1A	LGGANKEMTHLQK_3	Short	S_2	5	2	6	2.6	20.7967	QEP2_210813_AB_145
Q14683	Q14683	Structural maintenance of chromosomes protein 1A	SMC1A	LIEIENFK_2	Short	S_2	5	2	6	2.6	22.915	QEP2_210813_AB_145
Q14683	Q14683	Structural maintenance of chromosomes protein 1A	SMC1A	LKDEVVR_2	Short	S_2	5	2	6	2.6	22.95	QEP2_210813_AB_145
Q14683	Q14683	Structural maintenance of chromosomes protein 1A	SMC1A	LKYSQSDLEQTK_2	Short	S_2	5	2	6	2.6	21.6966	QEP2_210813_AB_145
Q14683	Q14683	Structural maintenance of chromosomes protein 1A	SMC1A	LKYSQSDLEQTK_3	Short	S_2	5	2	6	2.6	23.2524	QEP2_210813_AB_145
Q14683	Q14683	Structural maintenance of chromosomes protein 1A	SMC1A	LREIEENQK_2	Short	S_2	5	2	6	2.6	21.2634	QEP2_210813_AB_145
Q14683	Q14683	Structural maintenance of chromosomes protein 1A	SMC1A	LREIEENQKR_3	Short	S_2	5	2	6	2.6	22.2732	QEP2_210813_AB_145
Q14683	Q14683	Structural maintenance of chromosomes protein 1A	SMC1A	LTEELKEQMK_2	Short	S_2	5	2	6	2.6	23.2623	QEP2_210813_AB_145
Q14683	Q14683	Structural maintenance of chromosomes protein 1A	SMC1A	LTEELKEQMK_3	Short	S_2	5	2	6	2.6	22.8752	QEP2_210813_AB_145
Q14683	Q14683	Structural maintenance of chromosomes protein 1A	SMC1A	LYHNEVEIEK_2	Short	S_2	5	2	6	2.6	NA	QEP2_210813_AB_145
Q14683	Q14683	Structural maintenance of chromosomes protein 1A	SMC1A	LYHNEVEIEK_3	Short	S_2	5	2	6	2.6	NA	QEP2_210813_AB_145
Q14683	Q14683	Structural maintenance of chromosomes protein 1A	SMC1A	LYPGSVYGR_2	Short	S_2	5	2	6	2.6	23.0953	QEP2_210813_AB_145
Q14683	Q14683	Structural maintenance of chromosomes protein 1A	SMC1A	MEEESQSQGR_2	Short	S_2	5	2	6	2.6	NA	QEP2_210813_AB_145
Q14683	Q14683	Structural maintenance of chromosomes protein 1A	SMC1A	NFLVFQGAVESIAMKNPK_3	Short	S_2	5	2	6	2.6	NA	QEP2_210813_AB_145
Q14683	Q14683	Structural maintenance of chromosomes protein 1A	SMC1A	NIREFEEEKVK_3	Short	S_2	5	2	6	2.6	21.7273	QEP2_210813_AB_145
Q14683	Q14683	Structural maintenance of chromosomes protein 1A	SMC1A	NMDAIIVDSEK_2	Short	S_2	5	2	6	2.6	21.9886	QEP2_210813_AB_145
Q14683	Q14683	Structural maintenance of chromosomes protein 1A	SMC1A	NSSAQAFLGPENPEEPYLDGINYNCVAPGKR_3	Short	S_2	5	2	6	2.6	22.0241	QEP2_210813_AB_145
Q14683	Q14683	Structural maintenance of chromosomes protein 1A	SMC1A	QAFEQIKK_2	Short	S_2	5	2	6	2.6	NA	QEP2_210813_AB_145
Q14683	Q14683	Structural maintenance of chromosomes protein 1A	SMC1A	QIIGPFQR_2	Short	S_2	5	2	6	2.6	22.0644	QEP2_210813_AB_145
Q14683	Q14683	Structural maintenance of chromosomes protein 1A	SMC1A	QVQSQAHGLQMR_2	Short	S_2	5	2	6	2.6	22.0506	QEP2_210813_AB_145
Q14683	Q14683	Structural maintenance of chromosomes protein 1A	SMC1A	QVQSQAHGLQMR_3	Short	S_2	5	2	6	2.6	NA	QEP2_210813_AB_145
Q14683	Q14683	Structural maintenance of chromosomes protein 1A	SMC1A	RIDEINKELNQVMEQLGDAR_3	Short	S_2	5	2	6	2.6	20.8499	QEP2_210813_AB_145
Q14683	Q14683	Structural maintenance of chromosomes protein 1A	SMC1A	RIDEINKELNQVMEQLGDAR_4	Short	S_2	5	2	6	2.6	NA	QEP2_210813_AB_145
Q14683	Q14683	Structural maintenance of chromosomes protein 1A	SMC1A	SGELAQEYDKR_2	Short	S_2	5	2	6	2.6	21.3835	QEP2_210813_AB_145
Q14683	Q14683	Structural maintenance of chromosomes protein 1A	SMC1A	SKLESELANFGPR_2	Short	S_2	5	2	6	2.6	22.0724	QEP2_210813_AB_145
Q14683	Q14683	Structural maintenance of chromosomes protein 1A	SMC1A	SKLESELANFGPR_3	Short	S_2	5	2	6	2.6	22.8859	QEP2_210813_AB_145
Q14683	Q14683	Structural maintenance of chromosomes protein 1A	SMC1A	TALFEEISR_2	Short	S_2	5	2	6	2.6	23.4847	QEP2_210813_AB_145
Q14683	Q14683	Structural maintenance of chromosomes protein 1A	SMC1A	VIVGGSSEYKINNK_3	Short	S_2	5	2	6	2.6	21.6475	QEP2_210813_AB_145
Q14683	Q14683	Structural maintenance of chromosomes protein 1A	SMC1A	VLTFDLTKYPDANPNPNEQ_3	Short	S_2	5	2	6	2.6	20.9529	QEP2_210813_AB_145
Q14683	Q14683	Structural maintenance of chromosomes protein 1A	SMC1A	AATLAQELEK_2	Short	S_3	6	2	9	2.9	23.1378	QEP2_210813_AB_157
Q14683	Q14683	Structural maintenance of chromosomes protein 1A	SMC1A	AATLAQELEKFNR_3	Short	S_3	6	2	9	2.9	21.658	QEP2_210813_AB_157
Q14683	Q14683	Structural maintenance of chromosomes protein 1A	SMC1A	ADQDRLDLEER_3	Short	S_3	6	2	9	2.9	22.3491	QEP2_210813_AB_157
Q14683	Q14683	Structural maintenance of chromosomes protein 1A	SMC1A	AFVSMVYSEEGAEDR_2	Short	S_3	6	2	9	2.9	NA	QEP2_210813_AB_157
Q14683	Q14683	Structural maintenance of chromosomes protein 1A	SMC1A	AFVSMVYSEEGAEDRTFAR_3	Short	S_3	6	2	9	2.9	22.3025	QEP2_210813_AB_157
Q14683	Q14683	Structural maintenance of chromosomes protein 1A	SMC1A	AQVQLQLFK_2	Short	S_3	6	2	9	2.9	23.6697	QEP2_210813_AB_157
Q14683	Q14683	Structural maintenance of chromosomes protein 1A	SMC1A	DKFQETSDEFEAAR_2	Short	S_3	6	2	9	2.9	21.4229	QEP2_210813_AB_157
Q14683	Q14683	Structural maintenance of chromosomes protein 1A	SMC1A	DKFQETSDEFEAAR_3	Short	S_3	6	2	9	2.9	22.99	QEP2_210813_AB_157
Q14683	Q14683	Structural maintenance of chromosomes protein 1A	SMC1A	DLIHGAPVGKPAANR_3	Short	S_3	6	2	9	2.9	23.0791	QEP2_210813_AB_157
Q14683	Q14683	Structural maintenance of chromosomes protein 1A	SMC1A	DLTLEENQVKK_2	Short	S_3	6	2	9	2.9	NA	QEP2_210813_AB_157
Q14683	Q14683	Structural maintenance of chromosomes protein 1A	SMC1A	EMVKAEEDTQFNYHR_3	Short	S_3	6	2	9	2.9	NA	QEP2_210813_AB_157
Q14683	Q14683	Structural maintenance of chromosomes protein 1A	SMC1A	FRPMDNLSGGEK_2	Short	S_3	6	2	9	2.9	20.8982	QEP2_210813_AB_157
Q14683	Q14683	Structural maintenance of chromosomes protein 1A	SMC1A	FRPMDNLSGGEK_3	Short	S_3	6	2	9	2.9	NA	QEP2_210813_AB_157
Q14683	Q14683	Structural maintenance of chromosomes protein 1A	SMC1A	FTAIIGPNGSGK_2	Short	S_3	6	2	9	2.9	20.9	QEP2_210813_AB_157
Q14683	Q14683	Structural maintenance of chromosomes protein 1A	SMC1A	GEPETFLPLDYLEVKPTDEK_3	Short	S_3	6	2	9	2.9	NA	QEP2_210813_AB_157
Q14683	Q14683	Structural maintenance of chromosomes protein 1A	SMC1A	GEPETFLPLDYLEVKPTDEKLR_3	Short	S_3	6	2	9	2.9	22.1469	QEP2_210813_AB_157
Q14683	Q14683	Structural maintenance of chromosomes protein 1A	SMC1A	GEPETFLPLDYLEVKPTDEKLR_4	Short	S_3	6	2	9	2.9	23.6621	QEP2_210813_AB_157
Q14683	Q14683	Structural maintenance of chromosomes protein 1A	SMC1A	GTMDDISQEEGSSQGEDSVSGSQR_3	Short	S_3	6	2	9	2.9	21.9387	QEP2_210813_AB_157
Q14683	Q14683	Structural maintenance of chromosomes protein 1A	SMC1A	HKTVALDGTLFQK_3	Short	S_3	6	2	9	2.9	NA	QEP2_210813_AB_157
Q14683	Q14683	Structural maintenance of chromosomes protein 1A	SMC1A	HLALNLQEK_2	Short	S_3	6	2	9	2.9	23.4822	QEP2_210813_AB_157
Q14683	Q14683	Structural maintenance of chromosomes protein 1A	SMC1A	IEKLEEYITTSK_2	Short	S_3	6	2	9	2.9	21.3221	QEP2_210813_AB_157
Q14683	Q14683	Structural maintenance of chromosomes protein 1A	SMC1A	IEKLEEYITTSK_3	Short	S_3	6	2	9	2.9	22.0388	QEP2_210813_AB_157
Q14683	Q14683	Structural maintenance of chromosomes protein 1A	SMC1A	IIDETMAQLQDLK_2	Short	S_3	6	2	9	2.9	21.0806	QEP2_210813_AB_157
Q14683	Q14683	Structural maintenance of chromosomes protein 1A	SMC1A	IIDETMAQLQDLKNQHLAK_3	Short	S_3	6	2	9	2.9	22.6592	QEP2_210813_AB_157
Q14683	Q14683	Structural maintenance of chromosomes protein 1A	SMC1A	IIDETMAQLQDLKNQHLAK_4	Short	S_3	6	2	9	2.9	23.5019	QEP2_210813_AB_157
Q14683	Q14683	Structural maintenance of chromosomes protein 1A	SMC1A	ISSIYAR_2	Short	S_3	6	2	9	2.9	24.135	QEP2_210813_AB_157
Q14683	Q14683	Structural maintenance of chromosomes protein 1A	SMC1A	KAEIMESIKR_3	Short	S_3	6	2	9	2.9	21.634	QEP2_210813_AB_157
Q14683	Q14683	Structural maintenance of chromosomes protein 1A	SMC1A	KSEVNDKNHEMEEIR_4	Short	S_3	6	2	9	2.9	22.708	QEP2_210813_AB_157
Q14683	Q14683	Structural maintenance of chromosomes protein 1A	SMC1A	LGGANKEMTHLQK_3	Short	S_3	6	2	9	2.9	20.6511	QEP2_210813_AB_157
Q14683	Q14683	Structural maintenance of chromosomes protein 1A	SMC1A	LIEIENFK_2	Short	S_3	6	2	9	2.9	22.8901	QEP2_210813_AB_157
Q14683	Q14683	Structural maintenance of chromosomes protein 1A	SMC1A	LKDEVVR_2	Short	S_3	6	2	9	2.9	23.4076	QEP2_210813_AB_157
Q14683	Q14683	Structural maintenance of chromosomes protein 1A	SMC1A	LKYSQSDLEQTK_2	Short	S_3	6	2	9	2.9	22.0808	QEP2_210813_AB_157
Q14683	Q14683	Structural maintenance of chromosomes protein 1A	SMC1A	LKYSQSDLEQTK_3	Short	S_3	6	2	9	2.9	23.656	QEP2_210813_AB_157
Q14683	Q14683	Structural maintenance of chromosomes protein 1A	SMC1A	LREIEENQK_2	Short	S_3	6	2	9	2.9	22.1987	QEP2_210813_AB_157
Q14683	Q14683	Structural maintenance of chromosomes protein 1A	SMC1A	LREIEENQKR_3	Short	S_3	6	2	9	2.9	NA	QEP2_210813_AB_157
Q14683	Q14683	Structural maintenance of chromosomes protein 1A	SMC1A	LTEELKEQMK_2	Short	S_3	6	2	9	2.9	23.4566	QEP2_210813_AB_157
Q14683	Q14683	Structural maintenance of chromosomes protein 1A	SMC1A	LTEELKEQMK_3	Short	S_3	6	2	9	2.9	23.0039	QEP2_210813_AB_157
Q14683	Q14683	Structural maintenance of chromosomes protein 1A	SMC1A	LYHNEVEIEK_2	Short	S_3	6	2	9	2.9	21.2809	QEP2_210813_AB_157
Q14683	Q14683	Structural maintenance of chromosomes protein 1A	SMC1A	LYHNEVEIEK_3	Short	S_3	6	2	9	2.9	23.0551	QEP2_210813_AB_157
Q14683	Q14683	Structural maintenance of chromosomes protein 1A	SMC1A	LYPGSVYGR_2	Short	S_3	6	2	9	2.9	23.1593	QEP2_210813_AB_157
Q14683	Q14683	Structural maintenance of chromosomes protein 1A	SMC1A	MEEESQSQGR_2	Short	S_3	6	2	9	2.9	19.7482	QEP2_210813_AB_157
Q14683	Q14683	Structural maintenance of chromosomes protein 1A	SMC1A	NFLVFQGAVESIAMKNPK_3	Short	S_3	6	2	9	2.9	22.2921	QEP2_210813_AB_157
Q14683	Q14683	Structural maintenance of chromosomes protein 1A	SMC1A	NIREFEEEKVK_3	Short	S_3	6	2	9	2.9	21.5888	QEP2_210813_AB_157
Q14683	Q14683	Structural maintenance of chromosomes protein 1A	SMC1A	NMDAIIVDSEK_2	Short	S_3	6	2	9	2.9	22.7861	QEP2_210813_AB_157
Q14683	Q14683	Structural maintenance of chromosomes protein 1A	SMC1A	NSSAQAFLGPENPEEPYLDGINYNCVAPGKR_3	Short	S_3	6	2	9	2.9	21.2238	QEP2_210813_AB_157
Q14683	Q14683	Structural maintenance of chromosomes protein 1A	SMC1A	QAFEQIKK_2	Short	S_3	6	2	9	2.9	22.9363	QEP2_210813_AB_157
Q14683	Q14683	Structural maintenance of chromosomes protein 1A	SMC1A	QIIGPFQR_2	Short	S_3	6	2	9	2.9	21.9491	QEP2_210813_AB_157
Q14683	Q14683	Structural maintenance of chromosomes protein 1A	SMC1A	QVQSQAHGLQMR_2	Short	S_3	6	2	9	2.9	22.3728	QEP2_210813_AB_157
Q14683	Q14683	Structural maintenance of chromosomes protein 1A	SMC1A	QVQSQAHGLQMR_3	Short	S_3	6	2	9	2.9	24.3246	QEP2_210813_AB_157
Q14683	Q14683	Structural maintenance of chromosomes protein 1A	SMC1A	RIDEINKELNQVMEQLGDAR_3	Short	S_3	6	2	9	2.9	21.6412	QEP2_210813_AB_157
Q14683	Q14683	Structural maintenance of chromosomes protein 1A	SMC1A	RIDEINKELNQVMEQLGDAR_4	Short	S_3	6	2	9	2.9	21.3631	QEP2_210813_AB_157
Q14683	Q14683	Structural maintenance of chromosomes protein 1A	SMC1A	SGELAQEYDKR_2	Short	S_3	6	2	9	2.9	21.8126	QEP2_210813_AB_157
Q14683	Q14683	Structural maintenance of chromosomes protein 1A	SMC1A	SKLESELANFGPR_2	Short	S_3	6	2	9	2.9	22.0465	QEP2_210813_AB_157
Q14683	Q14683	Structural maintenance of chromosomes protein 1A	SMC1A	SKLESELANFGPR_3	Short	S_3	6	2	9	2.9	22.8705	QEP2_210813_AB_157
Q14683	Q14683	Structural maintenance of chromosomes protein 1A	SMC1A	TALFEEISR_2	Short	S_3	6	2	9	2.9	23.5337	QEP2_210813_AB_157
Q14683	Q14683	Structural maintenance of chromosomes protein 1A	SMC1A	VIVGGSSEYKINNK_3	Short	S_3	6	2	9	2.9	22.2917	QEP2_210813_AB_157
Q14683	Q14683	Structural maintenance of chromosomes protein 1A	SMC1A	VLTFDLTKYPDANPNPNEQ_3	Short	S_3	6	2	9	2.9	20.6737	QEP2_210813_AB_157
Q14683	Q14683	Structural maintenance of chromosomes protein 1A	SMC1A	AATLAQELEK_2	Long	L_1	7	3	2	3.2	22.2891	QEP2_210813_AB_129
Q14683	Q14683	Structural maintenance of chromosomes protein 1A	SMC1A	AATLAQELEKFNR_3	Long	L_1	7	3	2	3.2	NA	QEP2_210813_AB_129
Q14683	Q14683	Structural maintenance of chromosomes protein 1A	SMC1A	ADQDRLDLEER_3	Long	L_1	7	3	2	3.2	21.7995	QEP2_210813_AB_129
Q14683	Q14683	Structural maintenance of chromosomes protein 1A	SMC1A	AFVSMVYSEEGAEDR_2	Long	L_1	7	3	2	3.2	19.9426	QEP2_210813_AB_129
Q14683	Q14683	Structural maintenance of chromosomes protein 1A	SMC1A	AFVSMVYSEEGAEDRTFAR_3	Long	L_1	7	3	2	3.2	NA	QEP2_210813_AB_129
Q14683	Q14683	Structural maintenance of chromosomes protein 1A	SMC1A	AQVQLQLFK_2	Long	L_1	7	3	2	3.2	21.7875	QEP2_210813_AB_129
Q14683	Q14683	Structural maintenance of chromosomes protein 1A	SMC1A	DKFQETSDEFEAAR_2	Long	L_1	7	3	2	3.2	20.9437	QEP2_210813_AB_129
Q14683	Q14683	Structural maintenance of chromosomes protein 1A	SMC1A	DKFQETSDEFEAAR_3	Long	L_1	7	3	2	3.2	22.0393	QEP2_210813_AB_129
Q14683	Q14683	Structural maintenance of chromosomes protein 1A	SMC1A	DLIHGAPVGKPAANR_3	Long	L_1	7	3	2	3.2	22.1064	QEP2_210813_AB_129
Q14683	Q14683	Structural maintenance of chromosomes protein 1A	SMC1A	DLTLEENQVKK_2	Long	L_1	7	3	2	3.2	20.5688	QEP2_210813_AB_129
Q14683	Q14683	Structural maintenance of chromosomes protein 1A	SMC1A	EMVKAEEDTQFNYHR_3	Long	L_1	7	3	2	3.2	19.615	QEP2_210813_AB_129
Q14683	Q14683	Structural maintenance of chromosomes protein 1A	SMC1A	FRPMDNLSGGEK_2	Long	L_1	7	3	2	3.2	NA	QEP2_210813_AB_129
Q14683	Q14683	Structural maintenance of chromosomes protein 1A	SMC1A	FRPMDNLSGGEK_3	Long	L_1	7	3	2	3.2	20.6987	QEP2_210813_AB_129
Q14683	Q14683	Structural maintenance of chromosomes protein 1A	SMC1A	FTAIIGPNGSGK_2	Long	L_1	7	3	2	3.2	19.573	QEP2_210813_AB_129
Q14683	Q14683	Structural maintenance of chromosomes protein 1A	SMC1A	GEPETFLPLDYLEVKPTDEK_3	Long	L_1	7	3	2	3.2	19.6016	QEP2_210813_AB_129
Q14683	Q14683	Structural maintenance of chromosomes protein 1A	SMC1A	GEPETFLPLDYLEVKPTDEKLR_3	Long	L_1	7	3	2	3.2	21.0806	QEP2_210813_AB_129
Q14683	Q14683	Structural maintenance of chromosomes protein 1A	SMC1A	GEPETFLPLDYLEVKPTDEKLR_4	Long	L_1	7	3	2	3.2	21.9746	QEP2_210813_AB_129
Q14683	Q14683	Structural maintenance of chromosomes protein 1A	SMC1A	GTMDDISQEEGSSQGEDSVSGSQR_3	Long	L_1	7	3	2	3.2	NA	QEP2_210813_AB_129
Q14683	Q14683	Structural maintenance of chromosomes protein 1A	SMC1A	HKTVALDGTLFQK_3	Long	L_1	7	3	2	3.2	NA	QEP2_210813_AB_129
Q14683	Q14683	Structural maintenance of chromosomes protein 1A	SMC1A	HLALNLQEK_2	Long	L_1	7	3	2	3.2	22.4151	QEP2_210813_AB_129
Q14683	Q14683	Structural maintenance of chromosomes protein 1A	SMC1A	IEKLEEYITTSK_2	Long	L_1	7	3	2	3.2	20.1417	QEP2_210813_AB_129
Q14683	Q14683	Structural maintenance of chromosomes protein 1A	SMC1A	IEKLEEYITTSK_3	Long	L_1	7	3	2	3.2	20.338	QEP2_210813_AB_129
Q14683	Q14683	Structural maintenance of chromosomes protein 1A	SMC1A	IIDETMAQLQDLK_2	Long	L_1	7	3	2	3.2	NA	QEP2_210813_AB_129
Q14683	Q14683	Structural maintenance of chromosomes protein 1A	SMC1A	IIDETMAQLQDLKNQHLAK_3	Long	L_1	7	3	2	3.2	20.8654	QEP2_210813_AB_129
Q14683	Q14683	Structural maintenance of chromosomes protein 1A	SMC1A	IIDETMAQLQDLKNQHLAK_4	Long	L_1	7	3	2	3.2	NA	QEP2_210813_AB_129
Q14683	Q14683	Structural maintenance of chromosomes protein 1A	SMC1A	ISSIYAR_2	Long	L_1	7	3	2	3.2	NA	QEP2_210813_AB_129
Q14683	Q14683	Structural maintenance of chromosomes protein 1A	SMC1A	KAEIMESIKR_3	Long	L_1	7	3	2	3.2	NA	QEP2_210813_AB_129
Q14683	Q14683	Structural maintenance of chromosomes protein 1A	SMC1A	KSEVNDKNHEMEEIR_4	Long	L_1	7	3	2	3.2	21.1366	QEP2_210813_AB_129
Q14683	Q14683	Structural maintenance of chromosomes protein 1A	SMC1A	LGGANKEMTHLQK_3	Long	L_1	7	3	2	3.2	NA	QEP2_210813_AB_129
Q14683	Q14683	Structural maintenance of chromosomes protein 1A	SMC1A	LIEIENFK_2	Long	L_1	7	3	2	3.2	21.9518	QEP2_210813_AB_129
Q14683	Q14683	Structural maintenance of chromosomes protein 1A	SMC1A	LKDEVVR_2	Long	L_1	7	3	2	3.2	NA	QEP2_210813_AB_129
Q14683	Q14683	Structural maintenance of chromosomes protein 1A	SMC1A	LKYSQSDLEQTK_2	Long	L_1	7	3	2	3.2	NA	QEP2_210813_AB_129
Q14683	Q14683	Structural maintenance of chromosomes protein 1A	SMC1A	LKYSQSDLEQTK_3	Long	L_1	7	3	2	3.2	21.9663	QEP2_210813_AB_129
Q14683	Q14683	Structural maintenance of chromosomes protein 1A	SMC1A	LREIEENQK_2	Long	L_1	7	3	2	3.2	21.0891	QEP2_210813_AB_129
Q14683	Q14683	Structural maintenance of chromosomes protein 1A	SMC1A	LREIEENQKR_3	Long	L_1	7	3	2	3.2	NA	QEP2_210813_AB_129
Q14683	Q14683	Structural maintenance of chromosomes protein 1A	SMC1A	LTEELKEQMK_2	Long	L_1	7	3	2	3.2	22.2445	QEP2_210813_AB_129
Q14683	Q14683	Structural maintenance of chromosomes protein 1A	SMC1A	LTEELKEQMK_3	Long	L_1	7	3	2	3.2	NA	QEP2_210813_AB_129
Q14683	Q14683	Structural maintenance of chromosomes protein 1A	SMC1A	LYHNEVEIEK_2	Long	L_1	7	3	2	3.2	21.2737	QEP2_210813_AB_129
Q14683	Q14683	Structural maintenance of chromosomes protein 1A	SMC1A	LYHNEVEIEK_3	Long	L_1	7	3	2	3.2	22.1255	QEP2_210813_AB_129
Q14683	Q14683	Structural maintenance of chromosomes protein 1A	SMC1A	LYPGSVYGR_2	Long	L_1	7	3	2	3.2	21.8611	QEP2_210813_AB_129
Q14683	Q14683	Structural maintenance of chromosomes protein 1A	SMC1A	MEEESQSQGR_2	Long	L_1	7	3	2	3.2	NA	QEP2_210813_AB_129
Q14683	Q14683	Structural maintenance of chromosomes protein 1A	SMC1A	NFLVFQGAVESIAMKNPK_3	Long	L_1	7	3	2	3.2	NA	QEP2_210813_AB_129
Q14683	Q14683	Structural maintenance of chromosomes protein 1A	SMC1A	NIREFEEEKVK_3	Long	L_1	7	3	2	3.2	NA	QEP2_210813_AB_129
Q14683	Q14683	Structural maintenance of chromosomes protein 1A	SMC1A	NMDAIIVDSEK_2	Long	L_1	7	3	2	3.2	21.9809	QEP2_210813_AB_129
Q14683	Q14683	Structural maintenance of chromosomes protein 1A	SMC1A	NSSAQAFLGPENPEEPYLDGINYNCVAPGKR_3	Long	L_1	7	3	2	3.2	NA	QEP2_210813_AB_129
Q14683	Q14683	Structural maintenance of chromosomes protein 1A	SMC1A	QAFEQIKK_2	Long	L_1	7	3	2	3.2	NA	QEP2_210813_AB_129
Q14683	Q14683	Structural maintenance of chromosomes protein 1A	SMC1A	QIIGPFQR_2	Long	L_1	7	3	2	3.2	20.9538	QEP2_210813_AB_129
Q14683	Q14683	Structural maintenance of chromosomes protein 1A	SMC1A	QVQSQAHGLQMR_2	Long	L_1	7	3	2	3.2	22.1558	QEP2_210813_AB_129
Q14683	Q14683	Structural maintenance of chromosomes protein 1A	SMC1A	QVQSQAHGLQMR_3	Long	L_1	7	3	2	3.2	23.0923	QEP2_210813_AB_129
Q14683	Q14683	Structural maintenance of chromosomes protein 1A	SMC1A	RIDEINKELNQVMEQLGDAR_3	Long	L_1	7	3	2	3.2	NA	QEP2_210813_AB_129
Q14683	Q14683	Structural maintenance of chromosomes protein 1A	SMC1A	RIDEINKELNQVMEQLGDAR_4	Long	L_1	7	3	2	3.2	NA	QEP2_210813_AB_129
Q14683	Q14683	Structural maintenance of chromosomes protein 1A	SMC1A	SGELAQEYDKR_2	Long	L_1	7	3	2	3.2	NA	QEP2_210813_AB_129
Q14683	Q14683	Structural maintenance of chromosomes protein 1A	SMC1A	SKLESELANFGPR_2	Long	L_1	7	3	2	3.2	21.3505	QEP2_210813_AB_129
Q14683	Q14683	Structural maintenance of chromosomes protein 1A	SMC1A	SKLESELANFGPR_3	Long	L_1	7	3	2	3.2	21.787	QEP2_210813_AB_129
Q14683	Q14683	Structural maintenance of chromosomes protein 1A	SMC1A	TALFEEISR_2	Long	L_1	7	3	2	3.2	21.9883	QEP2_210813_AB_129
Q14683	Q14683	Structural maintenance of chromosomes protein 1A	SMC1A	VIVGGSSEYKINNK_3	Long	L_1	7	3	2	3.2	NA	QEP2_210813_AB_129
Q14683	Q14683	Structural maintenance of chromosomes protein 1A	SMC1A	VLTFDLTKYPDANPNPNEQ_3	Long	L_1	7	3	2	3.2	NA	QEP2_210813_AB_129
Q14683	Q14683	Structural maintenance of chromosomes protein 1A	SMC1A	AATLAQELEK_2	Long	L_2	8	3	5	3.5	23.272	QEP2_210813_AB_141
Q14683	Q14683	Structural maintenance of chromosomes protein 1A	SMC1A	AATLAQELEKFNR_3	Long	L_2	8	3	5	3.5	21.7761	QEP2_210813_AB_141
Q14683	Q14683	Structural maintenance of chromosomes protein 1A	SMC1A	ADQDRLDLEER_3	Long	L_2	8	3	5	3.5	22.1379	QEP2_210813_AB_141
Q14683	Q14683	Structural maintenance of chromosomes protein 1A	SMC1A	AFVSMVYSEEGAEDR_2	Long	L_2	8	3	5	3.5	20.1784	QEP2_210813_AB_141
Q14683	Q14683	Structural maintenance of chromosomes protein 1A	SMC1A	AFVSMVYSEEGAEDRTFAR_3	Long	L_2	8	3	5	3.5	22.736	QEP2_210813_AB_141
Q14683	Q14683	Structural maintenance of chromosomes protein 1A	SMC1A	AQVQLQLFK_2	Long	L_2	8	3	5	3.5	23.8895	QEP2_210813_AB_141
Q14683	Q14683	Structural maintenance of chromosomes protein 1A	SMC1A	DKFQETSDEFEAAR_2	Long	L_2	8	3	5	3.5	21.6267	QEP2_210813_AB_141
Q14683	Q14683	Structural maintenance of chromosomes protein 1A	SMC1A	DKFQETSDEFEAAR_3	Long	L_2	8	3	5	3.5	23.3288	QEP2_210813_AB_141
Q14683	Q14683	Structural maintenance of chromosomes protein 1A	SMC1A	DLIHGAPVGKPAANR_3	Long	L_2	8	3	5	3.5	22.9655	QEP2_210813_AB_141
Q14683	Q14683	Structural maintenance of chromosomes protein 1A	SMC1A	DLTLEENQVKK_2	Long	L_2	8	3	5	3.5	21.7484	QEP2_210813_AB_141
Q14683	Q14683	Structural maintenance of chromosomes protein 1A	SMC1A	EMVKAEEDTQFNYHR_3	Long	L_2	8	3	5	3.5	20.8099	QEP2_210813_AB_141
Q14683	Q14683	Structural maintenance of chromosomes protein 1A	SMC1A	FRPMDNLSGGEK_2	Long	L_2	8	3	5	3.5	21.5901	QEP2_210813_AB_141
Q14683	Q14683	Structural maintenance of chromosomes protein 1A	SMC1A	FRPMDNLSGGEK_3	Long	L_2	8	3	5	3.5	22.0956	QEP2_210813_AB_141
Q14683	Q14683	Structural maintenance of chromosomes protein 1A	SMC1A	FTAIIGPNGSGK_2	Long	L_2	8	3	5	3.5	21.0994	QEP2_210813_AB_141
Q14683	Q14683	Structural maintenance of chromosomes protein 1A	SMC1A	GEPETFLPLDYLEVKPTDEK_3	Long	L_2	8	3	5	3.5	20.8112	QEP2_210813_AB_141
Q14683	Q14683	Structural maintenance of chromosomes protein 1A	SMC1A	GEPETFLPLDYLEVKPTDEKLR_3	Long	L_2	8	3	5	3.5	22.6574	QEP2_210813_AB_141
Q14683	Q14683	Structural maintenance of chromosomes protein 1A	SMC1A	GEPETFLPLDYLEVKPTDEKLR_4	Long	L_2	8	3	5	3.5	23.2922	QEP2_210813_AB_141
Q14683	Q14683	Structural maintenance of chromosomes protein 1A	SMC1A	GTMDDISQEEGSSQGEDSVSGSQR_3	Long	L_2	8	3	5	3.5	21.7142	QEP2_210813_AB_141
Q14683	Q14683	Structural maintenance of chromosomes protein 1A	SMC1A	HKTVALDGTLFQK_3	Long	L_2	8	3	5	3.5	22.1565	QEP2_210813_AB_141
Q14683	Q14683	Structural maintenance of chromosomes protein 1A	SMC1A	HLALNLQEK_2	Long	L_2	8	3	5	3.5	23.8641	QEP2_210813_AB_141
Q14683	Q14683	Structural maintenance of chromosomes protein 1A	SMC1A	IEKLEEYITTSK_2	Long	L_2	8	3	5	3.5	21.3565	QEP2_210813_AB_141
Q14683	Q14683	Structural maintenance of chromosomes protein 1A	SMC1A	IEKLEEYITTSK_3	Long	L_2	8	3	5	3.5	22.2598	QEP2_210813_AB_141
Q14683	Q14683	Structural maintenance of chromosomes protein 1A	SMC1A	IIDETMAQLQDLK_2	Long	L_2	8	3	5	3.5	20.5881	QEP2_210813_AB_141
Q14683	Q14683	Structural maintenance of chromosomes protein 1A	SMC1A	IIDETMAQLQDLKNQHLAK_3	Long	L_2	8	3	5	3.5	22.2482	QEP2_210813_AB_141
Q14683	Q14683	Structural maintenance of chromosomes protein 1A	SMC1A	IIDETMAQLQDLKNQHLAK_4	Long	L_2	8	3	5	3.5	23.0121	QEP2_210813_AB_141
Q14683	Q14683	Structural maintenance of chromosomes protein 1A	SMC1A	ISSIYAR_2	Long	L_2	8	3	5	3.5	24.4396	QEP2_210813_AB_141
Q14683	Q14683	Structural maintenance of chromosomes protein 1A	SMC1A	KAEIMESIKR_3	Long	L_2	8	3	5	3.5	22.5871	QEP2_210813_AB_141
Q14683	Q14683	Structural maintenance of chromosomes protein 1A	SMC1A	KSEVNDKNHEMEEIR_4	Long	L_2	8	3	5	3.5	23.0089	QEP2_210813_AB_141
Q14683	Q14683	Structural maintenance of chromosomes protein 1A	SMC1A	LGGANKEMTHLQK_3	Long	L_2	8	3	5	3.5	NA	QEP2_210813_AB_141
Q14683	Q14683	Structural maintenance of chromosomes protein 1A	SMC1A	LIEIENFK_2	Long	L_2	8	3	5	3.5	NA	QEP2_210813_AB_141
Q14683	Q14683	Structural maintenance of chromosomes protein 1A	SMC1A	LKDEVVR_2	Long	L_2	8	3	5	3.5	23.5653	QEP2_210813_AB_141
Q14683	Q14683	Structural maintenance of chromosomes protein 1A	SMC1A	LKYSQSDLEQTK_2	Long	L_2	8	3	5	3.5	22.6003	QEP2_210813_AB_141
Q14683	Q14683	Structural maintenance of chromosomes protein 1A	SMC1A	LKYSQSDLEQTK_3	Long	L_2	8	3	5	3.5	24.1953	QEP2_210813_AB_141
Q14683	Q14683	Structural maintenance of chromosomes protein 1A	SMC1A	LREIEENQK_2	Long	L_2	8	3	5	3.5	22.0405	QEP2_210813_AB_141
Q14683	Q14683	Structural maintenance of chromosomes protein 1A	SMC1A	LREIEENQKR_3	Long	L_2	8	3	5	3.5	22.2553	QEP2_210813_AB_141
Q14683	Q14683	Structural maintenance of chromosomes protein 1A	SMC1A	LTEELKEQMK_2	Long	L_2	8	3	5	3.5	23.9516	QEP2_210813_AB_141
Q14683	Q14683	Structural maintenance of chromosomes protein 1A	SMC1A	LTEELKEQMK_3	Long	L_2	8	3	5	3.5	23.1987	QEP2_210813_AB_141
Q14683	Q14683	Structural maintenance of chromosomes protein 1A	SMC1A	LYHNEVEIEK_2	Long	L_2	8	3	5	3.5	21.7635	QEP2_210813_AB_141
Q14683	Q14683	Structural maintenance of chromosomes protein 1A	SMC1A	LYHNEVEIEK_3	Long	L_2	8	3	5	3.5	23.014	QEP2_210813_AB_141
Q14683	Q14683	Structural maintenance of chromosomes protein 1A	SMC1A	LYPGSVYGR_2	Long	L_2	8	3	5	3.5	23.7235	QEP2_210813_AB_141
Q14683	Q14683	Structural maintenance of chromosomes protein 1A	SMC1A	MEEESQSQGR_2	Long	L_2	8	3	5	3.5	20.5524	QEP2_210813_AB_141
Q14683	Q14683	Structural maintenance of chromosomes protein 1A	SMC1A	NFLVFQGAVESIAMKNPK_3	Long	L_2	8	3	5	3.5	22.6627	QEP2_210813_AB_141
Q14683	Q14683	Structural maintenance of chromosomes protein 1A	SMC1A	NIREFEEEKVK_3	Long	L_2	8	3	5	3.5	21.936	QEP2_210813_AB_141
Q14683	Q14683	Structural maintenance of chromosomes protein 1A	SMC1A	NMDAIIVDSEK_2	Long	L_2	8	3	5	3.5	22.8852	QEP2_210813_AB_141
Q14683	Q14683	Structural maintenance of chromosomes protein 1A	SMC1A	NSSAQAFLGPENPEEPYLDGINYNCVAPGKR_3	Long	L_2	8	3	5	3.5	NA	QEP2_210813_AB_141
Q14683	Q14683	Structural maintenance of chromosomes protein 1A	SMC1A	QAFEQIKK_2	Long	L_2	8	3	5	3.5	23.1531	QEP2_210813_AB_141
Q14683	Q14683	Structural maintenance of chromosomes protein 1A	SMC1A	QIIGPFQR_2	Long	L_2	8	3	5	3.5	22.4535	QEP2_210813_AB_141
Q14683	Q14683	Structural maintenance of chromosomes protein 1A	SMC1A	QVQSQAHGLQMR_2	Long	L_2	8	3	5	3.5	NA	QEP2_210813_AB_141
Q14683	Q14683	Structural maintenance of chromosomes protein 1A	SMC1A	QVQSQAHGLQMR_3	Long	L_2	8	3	5	3.5	23.2754	QEP2_210813_AB_141
Q14683	Q14683	Structural maintenance of chromosomes protein 1A	SMC1A	RIDEINKELNQVMEQLGDAR_3	Long	L_2	8	3	5	3.5	22.5926	QEP2_210813_AB_141
Q14683	Q14683	Structural maintenance of chromosomes protein 1A	SMC1A	RIDEINKELNQVMEQLGDAR_4	Long	L_2	8	3	5	3.5	22.1536	QEP2_210813_AB_141
Q14683	Q14683	Structural maintenance of chromosomes protein 1A	SMC1A	SGELAQEYDKR_2	Long	L_2	8	3	5	3.5	21.8913	QEP2_210813_AB_141
Q14683	Q14683	Structural maintenance of chromosomes protein 1A	SMC1A	SKLESELANFGPR_2	Long	L_2	8	3	5	3.5	NA	QEP2_210813_AB_141
Q14683	Q14683	Structural maintenance of chromosomes protein 1A	SMC1A	SKLESELANFGPR_3	Long	L_2	8	3	5	3.5	22.9487	QEP2_210813_AB_141
Q14683	Q14683	Structural maintenance of chromosomes protein 1A	SMC1A	TALFEEISR_2	Long	L_2	8	3	5	3.5	23.7754	QEP2_210813_AB_141
Q14683	Q14683	Structural maintenance of chromosomes protein 1A	SMC1A	VIVGGSSEYKINNK_3	Long	L_2	8	3	5	3.5	NA	QEP2_210813_AB_141
Q14683	Q14683	Structural maintenance of chromosomes protein 1A	SMC1A	VLTFDLTKYPDANPNPNEQ_3	Long	L_2	8	3	5	3.5	22.3639	QEP2_210813_AB_141
Q14683	Q14683	Structural maintenance of chromosomes protein 1A	SMC1A	AATLAQELEK_2	Long	L_3	9	3	7	3.7	NA	QEP2_210813_AB_149
Q14683	Q14683	Structural maintenance of chromosomes protein 1A	SMC1A	AATLAQELEKFNR_3	Long	L_3	9	3	7	3.7	21.5506	QEP2_210813_AB_149
Q14683	Q14683	Structural maintenance of chromosomes protein 1A	SMC1A	ADQDRLDLEER_3	Long	L_3	9	3	7	3.7	21.3976	QEP2_210813_AB_149
Q14683	Q14683	Structural maintenance of chromosomes protein 1A	SMC1A	AFVSMVYSEEGAEDR_2	Long	L_3	9	3	7	3.7	NA	QEP2_210813_AB_149
Q14683	Q14683	Structural maintenance of chromosomes protein 1A	SMC1A	AFVSMVYSEEGAEDRTFAR_3	Long	L_3	9	3	7	3.7	22.385	QEP2_210813_AB_149
Q14683	Q14683	Structural maintenance of chromosomes protein 1A	SMC1A	AQVQLQLFK_2	Long	L_3	9	3	7	3.7	23.7393	QEP2_210813_AB_149
Q14683	Q14683	Structural maintenance of chromosomes protein 1A	SMC1A	DKFQETSDEFEAAR_2	Long	L_3	9	3	7	3.7	NA	QEP2_210813_AB_149
Q14683	Q14683	Structural maintenance of chromosomes protein 1A	SMC1A	DKFQETSDEFEAAR_3	Long	L_3	9	3	7	3.7	22.74	QEP2_210813_AB_149
Q14683	Q14683	Structural maintenance of chromosomes protein 1A	SMC1A	DLIHGAPVGKPAANR_3	Long	L_3	9	3	7	3.7	NA	QEP2_210813_AB_149
Q14683	Q14683	Structural maintenance of chromosomes protein 1A	SMC1A	DLTLEENQVKK_2	Long	L_3	9	3	7	3.7	21.3434	QEP2_210813_AB_149
Q14683	Q14683	Structural maintenance of chromosomes protein 1A	SMC1A	EMVKAEEDTQFNYHR_3	Long	L_3	9	3	7	3.7	20.7419	QEP2_210813_AB_149
Q14683	Q14683	Structural maintenance of chromosomes protein 1A	SMC1A	FRPMDNLSGGEK_2	Long	L_3	9	3	7	3.7	21.0066	QEP2_210813_AB_149
Q14683	Q14683	Structural maintenance of chromosomes protein 1A	SMC1A	FRPMDNLSGGEK_3	Long	L_3	9	3	7	3.7	21.5512	QEP2_210813_AB_149
Q14683	Q14683	Structural maintenance of chromosomes protein 1A	SMC1A	FTAIIGPNGSGK_2	Long	L_3	9	3	7	3.7	21.3981	QEP2_210813_AB_149
Q14683	Q14683	Structural maintenance of chromosomes protein 1A	SMC1A	GEPETFLPLDYLEVKPTDEK_3	Long	L_3	9	3	7	3.7	NA	QEP2_210813_AB_149
Q14683	Q14683	Structural maintenance of chromosomes protein 1A	SMC1A	GEPETFLPLDYLEVKPTDEKLR_3	Long	L_3	9	3	7	3.7	21.5769	QEP2_210813_AB_149
Q14683	Q14683	Structural maintenance of chromosomes protein 1A	SMC1A	GEPETFLPLDYLEVKPTDEKLR_4	Long	L_3	9	3	7	3.7	22.2155	QEP2_210813_AB_149
Q14683	Q14683	Structural maintenance of chromosomes protein 1A	SMC1A	GTMDDISQEEGSSQGEDSVSGSQR_3	Long	L_3	9	3	7	3.7	21.3731	QEP2_210813_AB_149
Q14683	Q14683	Structural maintenance of chromosomes protein 1A	SMC1A	HKTVALDGTLFQK_3	Long	L_3	9	3	7	3.7	22.3618	QEP2_210813_AB_149
Q14683	Q14683	Structural maintenance of chromosomes protein 1A	SMC1A	HLALNLQEK_2	Long	L_3	9	3	7	3.7	23.9622	QEP2_210813_AB_149
Q14683	Q14683	Structural maintenance of chromosomes protein 1A	SMC1A	IEKLEEYITTSK_2	Long	L_3	9	3	7	3.7	20.7078	QEP2_210813_AB_149
Q14683	Q14683	Structural maintenance of chromosomes protein 1A	SMC1A	IEKLEEYITTSK_3	Long	L_3	9	3	7	3.7	21.5924	QEP2_210813_AB_149
Q14683	Q14683	Structural maintenance of chromosomes protein 1A	SMC1A	IIDETMAQLQDLK_2	Long	L_3	9	3	7	3.7	NA	QEP2_210813_AB_149
Q14683	Q14683	Structural maintenance of chromosomes protein 1A	SMC1A	IIDETMAQLQDLKNQHLAK_3	Long	L_3	9	3	7	3.7	22.5912	QEP2_210813_AB_149
Q14683	Q14683	Structural maintenance of chromosomes protein 1A	SMC1A	IIDETMAQLQDLKNQHLAK_4	Long	L_3	9	3	7	3.7	23.5941	QEP2_210813_AB_149
Q14683	Q14683	Structural maintenance of chromosomes protein 1A	SMC1A	ISSIYAR_2	Long	L_3	9	3	7	3.7	24.357	QEP2_210813_AB_149
Q14683	Q14683	Structural maintenance of chromosomes protein 1A	SMC1A	KAEIMESIKR_3	Long	L_3	9	3	7	3.7	NA	QEP2_210813_AB_149
Q14683	Q14683	Structural maintenance of chromosomes protein 1A	SMC1A	KSEVNDKNHEMEEIR_4	Long	L_3	9	3	7	3.7	NA	QEP2_210813_AB_149
Q14683	Q14683	Structural maintenance of chromosomes protein 1A	SMC1A	LGGANKEMTHLQK_3	Long	L_3	9	3	7	3.7	21.7701	QEP2_210813_AB_149
Q14683	Q14683	Structural maintenance of chromosomes protein 1A	SMC1A	LIEIENFK_2	Long	L_3	9	3	7	3.7	22.6568	QEP2_210813_AB_149
Q14683	Q14683	Structural maintenance of chromosomes protein 1A	SMC1A	LKDEVVR_2	Long	L_3	9	3	7	3.7	NA	QEP2_210813_AB_149
Q14683	Q14683	Structural maintenance of chromosomes protein 1A	SMC1A	LKYSQSDLEQTK_2	Long	L_3	9	3	7	3.7	22.099	QEP2_210813_AB_149
Q14683	Q14683	Structural maintenance of chromosomes protein 1A	SMC1A	LKYSQSDLEQTK_3	Long	L_3	9	3	7	3.7	23.6729	QEP2_210813_AB_149
Q14683	Q14683	Structural maintenance of chromosomes protein 1A	SMC1A	LREIEENQK_2	Long	L_3	9	3	7	3.7	22.0547	QEP2_210813_AB_149
Q14683	Q14683	Structural maintenance of chromosomes protein 1A	SMC1A	LREIEENQKR_3	Long	L_3	9	3	7	3.7	22.1731	QEP2_210813_AB_149
Q14683	Q14683	Structural maintenance of chromosomes protein 1A	SMC1A	LTEELKEQMK_2	Long	L_3	9	3	7	3.7	23.3818	QEP2_210813_AB_149
Q14683	Q14683	Structural maintenance of chromosomes protein 1A	SMC1A	LTEELKEQMK_3	Long	L_3	9	3	7	3.7	23.1142	QEP2_210813_AB_149
Q14683	Q14683	Structural maintenance of chromosomes protein 1A	SMC1A	LYHNEVEIEK_2	Long	L_3	9	3	7	3.7	NA	QEP2_210813_AB_149
Q14683	Q14683	Structural maintenance of chromosomes protein 1A	SMC1A	LYHNEVEIEK_3	Long	L_3	9	3	7	3.7	NA	QEP2_210813_AB_149
Q14683	Q14683	Structural maintenance of chromosomes protein 1A	SMC1A	LYPGSVYGR_2	Long	L_3	9	3	7	3.7	23.3193	QEP2_210813_AB_149
Q14683	Q14683	Structural maintenance of chromosomes protein 1A	SMC1A	MEEESQSQGR_2	Long	L_3	9	3	7	3.7	NA	QEP2_210813_AB_149
Q14683	Q14683	Structural maintenance of chromosomes protein 1A	SMC1A	NFLVFQGAVESIAMKNPK_3	Long	L_3	9	3	7	3.7	22.5154	QEP2_210813_AB_149
Q14683	Q14683	Structural maintenance of chromosomes protein 1A	SMC1A	NIREFEEEKVK_3	Long	L_3	9	3	7	3.7	22.038	QEP2_210813_AB_149
Q14683	Q14683	Structural maintenance of chromosomes protein 1A	SMC1A	NMDAIIVDSEK_2	Long	L_3	9	3	7	3.7	NA	QEP2_210813_AB_149
Q14683	Q14683	Structural maintenance of chromosomes protein 1A	SMC1A	NSSAQAFLGPENPEEPYLDGINYNCVAPGKR_3	Long	L_3	9	3	7	3.7	22.2244	QEP2_210813_AB_149
Q14683	Q14683	Structural maintenance of chromosomes protein 1A	SMC1A	QAFEQIKK_2	Long	L_3	9	3	7	3.7	22.9011	QEP2_210813_AB_149
Q14683	Q14683	Structural maintenance of chromosomes protein 1A	SMC1A	QIIGPFQR_2	Long	L_3	9	3	7	3.7	22.1327	QEP2_210813_AB_149
Q14683	Q14683	Structural maintenance of chromosomes protein 1A	SMC1A	QVQSQAHGLQMR_2	Long	L_3	9	3	7	3.7	21.4781	QEP2_210813_AB_149
Q14683	Q14683	Structural maintenance of chromosomes protein 1A	SMC1A	QVQSQAHGLQMR_3	Long	L_3	9	3	7	3.7	NA	QEP2_210813_AB_149
Q14683	Q14683	Structural maintenance of chromosomes protein 1A	SMC1A	RIDEINKELNQVMEQLGDAR_3	Long	L_3	9	3	7	3.7	21.9518	QEP2_210813_AB_149
Q14683	Q14683	Structural maintenance of chromosomes protein 1A	SMC1A	RIDEINKELNQVMEQLGDAR_4	Long	L_3	9	3	7	3.7	21.2138	QEP2_210813_AB_149
Q14683	Q14683	Structural maintenance of chromosomes protein 1A	SMC1A	SGELAQEYDKR_2	Long	L_3	9	3	7	3.7	22.5045	QEP2_210813_AB_149
Q14683	Q14683	Structural maintenance of chromosomes protein 1A	SMC1A	SKLESELANFGPR_2	Long	L_3	9	3	7	3.7	22.665	QEP2_210813_AB_149
Q14683	Q14683	Structural maintenance of chromosomes protein 1A	SMC1A	SKLESELANFGPR_3	Long	L_3	9	3	7	3.7	23.3894	QEP2_210813_AB_149
Q14683	Q14683	Structural maintenance of chromosomes protein 1A	SMC1A	TALFEEISR_2	Long	L_3	9	3	7	3.7	23.791	QEP2_210813_AB_149
Q14683	Q14683	Structural maintenance of chromosomes protein 1A	SMC1A	VIVGGSSEYKINNK_3	Long	L_3	9	3	7	3.7	21.8182	QEP2_210813_AB_149
Q14683	Q14683	Structural maintenance of chromosomes protein 1A	SMC1A	VLTFDLTKYPDANPNPNEQ_3	Long	L_3	9	3	7	3.7	NA	QEP2_210813_AB_149
Q8N3U4;Q9UJ98;Q8TBR4	Q8N3U4	Cohesin subunit SA-2	STAG2 exon32?	LRPEDSFM(Oxidation (M))SVYPM(Oxidation (M))QTEHHQTPLDYNR_4	Control	C_1	1	1	3	1.3	NA	QEP2_210813_AB_133
Q8N3U4;Q9UJ98;Q8TBR4	Q8N3U4	Cohesin subunit SA-2	STAG2 exon32?	LRPEDSFM(Oxidation (M))SVYPMQTEHHQTPLDYNR_4	Control	C_1	1	1	3	1.3	NA	QEP2_210813_AB_133
Q8N3U4;Q9UJ98;Q8TBR4	Q8N3U4	Cohesin subunit SA-2	STAG2 exon32?	LRPEDSFM(Oxidation (M))SVYPMQTEHHQTPLDYNR_5	Control	C_1	1	1	3	1.3	NA	QEP2_210813_AB_133
Q8N3U4;Q9UJ98;Q8TBR4	Q8N3U4	Cohesin subunit SA-2	STAG2 exon32?	LRPEDSFM(Oxidation (M))SVYPMQTEHHQTPLDYNRR_4	Control	C_1	1	1	3	1.3	NA	QEP2_210813_AB_133
Q8N3U4;Q9UJ98;Q8TBR4	Q8N3U4	Cohesin subunit SA-2	STAG2 exon32?	LRPEDSFM(Oxidation (M))SVYPMQTEHHQTPLDYNRR_5	Control	C_1	1	1	3	1.3	NA	QEP2_210813_AB_133
Q8N3U4;Q9UJ98;Q8TBR4	Q8N3U4	Cohesin subunit SA-2	STAG2 exon32?	LRPEDSFM(Oxidation (M))SVYPMQTEHHQTPLDYNRR_6	Control	C_1	1	1	3	1.3	NA	QEP2_210813_AB_133
Q8N3U4;Q9UJ98;Q8TBR4	Q8N3U4	Cohesin subunit SA-2	STAG2 exon32?	LRPEDSFMSVYPM(Oxidation (M))QTEHHQTPLDYNR_3	Control	C_1	1	1	3	1.3	NA	QEP2_210813_AB_133
Q8N3U4;Q9UJ98;Q8TBR4	Q8N3U4	Cohesin subunit SA-2	STAG2 exon32?	LRPEDSFMSVYPM(Oxidation (M))QTEHHQTPLDYNR_4	Control	C_1	1	1	3	1.3	NA	QEP2_210813_AB_133
Q8N3U4;Q9UJ98;Q8TBR4	Q8N3U4	Cohesin subunit SA-2	STAG2 exon32?	LRPEDSFMSVYPMQTEHHQTPLDYNR_3	Control	C_1	1	1	3	1.3	NA	QEP2_210813_AB_133
Q8N3U4;Q9UJ98;Q8TBR4	Q8N3U4	Cohesin subunit SA-2	STAG2 exon32?	LRPEDSFMSVYPMQTEHHQTPLDYNR_4	Control	C_1	1	1	3	1.3	NA	QEP2_210813_AB_133
Q8N3U4;Q9UJ98;Q8TBR4	Q8N3U4	Cohesin subunit SA-2	STAG2 exon32?	LRPEDSFMSVYPMQTEHHQTPLDYNR_5	Control	C_1	1	1	3	1.3	NA	QEP2_210813_AB_133
Q8N3U4;Q9UJ98;Q8TBR4	Q8N3U4	Cohesin subunit SA-2	STAG2 exon32?	LRPEDSFMSVYPMQTEHHQTPLDYNRR_4	Control	C_1	1	1	3	1.3	NA	QEP2_210813_AB_133
Q8N3U4;Q9UJ98;Q8TBR4	Q8N3U4	Cohesin subunit SA-2	STAG2 exon32?	LRPEDSFMSVYPMQTEHHQTPLDYNRR_5	Control	C_1	1	1	3	1.3	NA	QEP2_210813_AB_133
Q8N3U4;Q9UJ98;Q8TBR4	Q8N3U4	Cohesin subunit SA-2	STAG2 exon32?	LRPEDSFMSVYPMQTEHHQTPLDYNRR_6	Control	C_1	1	1	3	1.3	NA	QEP2_210813_AB_133
Q8N3U4;Q9UJ98;Q8TBR4	Q8N3U4	Cohesin subunit SA-2	STAG2 exon32?	RLRPEDSFM(Oxidation (M))SVYPM(Oxidation (M))QTEHHQTPLDYNR_5	Control	C_1	1	1	3	1.3	NA	QEP2_210813_AB_133
Q8N3U4;Q9UJ98;Q8TBR4	Q8N3U4	Cohesin subunit SA-2	STAG2 exon32?	RLRPEDSFMSVYPM(Oxidation (M))QTEHHQTPLDYNR_4	Control	C_1	1	1	3	1.3	NA	QEP2_210813_AB_133
Q8N3U4;Q9UJ98;Q8TBR4	Q8N3U4	Cohesin subunit SA-2	STAG2 exon32?	RLRPEDSFMSVYPM(Oxidation (M))QTEHHQTPLDYNR_5	Control	C_1	1	1	3	1.3	NA	QEP2_210813_AB_133
Q8N3U4;Q9UJ98;Q8TBR4	Q8N3U4	Cohesin subunit SA-2	STAG2 exon32?	RLRPEDSFMSVYPMQTEHHQTPLDYNR_4	Control	C_1	1	1	3	1.3	NA	QEP2_210813_AB_133
Q8N3U4;Q9UJ98;Q8TBR4	Q8N3U4	Cohesin subunit SA-2	STAG2 exon32?	RLRPEDSFMSVYPMQTEHHQTPLDYNR_5	Control	C_1	1	1	3	1.3	NA	QEP2_210813_AB_133
Q8N3U4;Q9UJ98;Q8TBR4	Q8N3U4	Cohesin subunit SA-2	STAG2 exon32?	LRPEDSFM(Oxidation (M))SVYPM(Oxidation (M))QTEHHQTPLDYNR_4	Control	C_2	2	1	4	1.4	NA	QEP2_210813_AB_137
Q8N3U4;Q9UJ98;Q8TBR4	Q8N3U4	Cohesin subunit SA-2	STAG2 exon32?	LRPEDSFM(Oxidation (M))SVYPMQTEHHQTPLDYNR_4	Control	C_2	2	1	4	1.4	NA	QEP2_210813_AB_137
Q8N3U4;Q9UJ98;Q8TBR4	Q8N3U4	Cohesin subunit SA-2	STAG2 exon32?	LRPEDSFM(Oxidation (M))SVYPMQTEHHQTPLDYNR_5	Control	C_2	2	1	4	1.4	NA	QEP2_210813_AB_137
Q8N3U4;Q9UJ98;Q8TBR4	Q8N3U4	Cohesin subunit SA-2	STAG2 exon32?	LRPEDSFM(Oxidation (M))SVYPMQTEHHQTPLDYNRR_4	Control	C_2	2	1	4	1.4	NA	QEP2_210813_AB_137
Q8N3U4;Q9UJ98;Q8TBR4	Q8N3U4	Cohesin subunit SA-2	STAG2 exon32?	LRPEDSFM(Oxidation (M))SVYPMQTEHHQTPLDYNRR_5	Control	C_2	2	1	4	1.4	NA	QEP2_210813_AB_137
Q8N3U4;Q9UJ98;Q8TBR4	Q8N3U4	Cohesin subunit SA-2	STAG2 exon32?	LRPEDSFM(Oxidation (M))SVYPMQTEHHQTPLDYNRR_6	Control	C_2	2	1	4	1.4	NA	QEP2_210813_AB_137
Q8N3U4;Q9UJ98;Q8TBR4	Q8N3U4	Cohesin subunit SA-2	STAG2 exon32?	LRPEDSFMSVYPM(Oxidation (M))QTEHHQTPLDYNR_3	Control	C_2	2	1	4	1.4	NA	QEP2_210813_AB_137
Q8N3U4;Q9UJ98;Q8TBR4	Q8N3U4	Cohesin subunit SA-2	STAG2 exon32?	LRPEDSFMSVYPM(Oxidation (M))QTEHHQTPLDYNR_4	Control	C_2	2	1	4	1.4	NA	QEP2_210813_AB_137
Q8N3U4;Q9UJ98;Q8TBR4	Q8N3U4	Cohesin subunit SA-2	STAG2 exon32?	LRPEDSFMSVYPMQTEHHQTPLDYNR_3	Control	C_2	2	1	4	1.4	NA	QEP2_210813_AB_137
Q8N3U4;Q9UJ98;Q8TBR4	Q8N3U4	Cohesin subunit SA-2	STAG2 exon32?	LRPEDSFMSVYPMQTEHHQTPLDYNR_4	Control	C_2	2	1	4	1.4	NA	QEP2_210813_AB_137
Q8N3U4;Q9UJ98;Q8TBR4	Q8N3U4	Cohesin subunit SA-2	STAG2 exon32?	LRPEDSFMSVYPMQTEHHQTPLDYNR_5	Control	C_2	2	1	4	1.4	NA	QEP2_210813_AB_137
Q8N3U4;Q9UJ98;Q8TBR4	Q8N3U4	Cohesin subunit SA-2	STAG2 exon32?	LRPEDSFMSVYPMQTEHHQTPLDYNRR_4	Control	C_2	2	1	4	1.4	NA	QEP2_210813_AB_137
Q8N3U4;Q9UJ98;Q8TBR4	Q8N3U4	Cohesin subunit SA-2	STAG2 exon32?	LRPEDSFMSVYPMQTEHHQTPLDYNRR_5	Control	C_2	2	1	4	1.4	NA	QEP2_210813_AB_137
Q8N3U4;Q9UJ98;Q8TBR4	Q8N3U4	Cohesin subunit SA-2	STAG2 exon32?	LRPEDSFMSVYPMQTEHHQTPLDYNRR_6	Control	C_2	2	1	4	1.4	NA	QEP2_210813_AB_137
Q8N3U4;Q9UJ98;Q8TBR4	Q8N3U4	Cohesin subunit SA-2	STAG2 exon32?	RLRPEDSFM(Oxidation (M))SVYPM(Oxidation (M))QTEHHQTPLDYNR_5	Control	C_2	2	1	4	1.4	NA	QEP2_210813_AB_137
Q8N3U4;Q9UJ98;Q8TBR4	Q8N3U4	Cohesin subunit SA-2	STAG2 exon32?	RLRPEDSFMSVYPM(Oxidation (M))QTEHHQTPLDYNR_4	Control	C_2	2	1	4	1.4	NA	QEP2_210813_AB_137
Q8N3U4;Q9UJ98;Q8TBR4	Q8N3U4	Cohesin subunit SA-2	STAG2 exon32?	RLRPEDSFMSVYPM(Oxidation (M))QTEHHQTPLDYNR_5	Control	C_2	2	1	4	1.4	NA	QEP2_210813_AB_137
Q8N3U4;Q9UJ98;Q8TBR4	Q8N3U4	Cohesin subunit SA-2	STAG2 exon32?	RLRPEDSFMSVYPMQTEHHQTPLDYNR_4	Control	C_2	2	1	4	1.4	NA	QEP2_210813_AB_137
Q8N3U4;Q9UJ98;Q8TBR4	Q8N3U4	Cohesin subunit SA-2	STAG2 exon32?	RLRPEDSFMSVYPMQTEHHQTPLDYNR_5	Control	C_2	2	1	4	1.4	NA	QEP2_210813_AB_137
Q8N3U4;Q9UJ98;Q8TBR4	Q8N3U4	Cohesin subunit SA-2	STAG2 exon32?	LRPEDSFM(Oxidation (M))SVYPM(Oxidation (M))QTEHHQTPLDYNR_4	Control	C_3	3	1	8	1.8	NA	QEP2_210813_AB_153
Q8N3U4;Q9UJ98;Q8TBR4	Q8N3U4	Cohesin subunit SA-2	STAG2 exon32?	LRPEDSFM(Oxidation (M))SVYPMQTEHHQTPLDYNR_4	Control	C_3	3	1	8	1.8	NA	QEP2_210813_AB_153
Q8N3U4;Q9UJ98;Q8TBR4	Q8N3U4	Cohesin subunit SA-2	STAG2 exon32?	LRPEDSFM(Oxidation (M))SVYPMQTEHHQTPLDYNR_5	Control	C_3	3	1	8	1.8	NA	QEP2_210813_AB_153
Q8N3U4;Q9UJ98;Q8TBR4	Q8N3U4	Cohesin subunit SA-2	STAG2 exon32?	LRPEDSFM(Oxidation (M))SVYPMQTEHHQTPLDYNRR_4	Control	C_3	3	1	8	1.8	NA	QEP2_210813_AB_153
Q8N3U4;Q9UJ98;Q8TBR4	Q8N3U4	Cohesin subunit SA-2	STAG2 exon32?	LRPEDSFM(Oxidation (M))SVYPMQTEHHQTPLDYNRR_5	Control	C_3	3	1	8	1.8	NA	QEP2_210813_AB_153
Q8N3U4;Q9UJ98;Q8TBR4	Q8N3U4	Cohesin subunit SA-2	STAG2 exon32?	LRPEDSFM(Oxidation (M))SVYPMQTEHHQTPLDYNRR_6	Control	C_3	3	1	8	1.8	NA	QEP2_210813_AB_153
Q8N3U4;Q9UJ98;Q8TBR4	Q8N3U4	Cohesin subunit SA-2	STAG2 exon32?	LRPEDSFMSVYPM(Oxidation (M))QTEHHQTPLDYNR_3	Control	C_3	3	1	8	1.8	NA	QEP2_210813_AB_153
Q8N3U4;Q9UJ98;Q8TBR4	Q8N3U4	Cohesin subunit SA-2	STAG2 exon32?	LRPEDSFMSVYPM(Oxidation (M))QTEHHQTPLDYNR_4	Control	C_3	3	1	8	1.8	NA	QEP2_210813_AB_153
Q8N3U4;Q9UJ98;Q8TBR4	Q8N3U4	Cohesin subunit SA-2	STAG2 exon32?	LRPEDSFMSVYPMQTEHHQTPLDYNR_3	Control	C_3	3	1	8	1.8	NA	QEP2_210813_AB_153
Q8N3U4;Q9UJ98;Q8TBR4	Q8N3U4	Cohesin subunit SA-2	STAG2 exon32?	LRPEDSFMSVYPMQTEHHQTPLDYNR_4	Control	C_3	3	1	8	1.8	NA	QEP2_210813_AB_153
Q8N3U4;Q9UJ98;Q8TBR4	Q8N3U4	Cohesin subunit SA-2	STAG2 exon32?	LRPEDSFMSVYPMQTEHHQTPLDYNR_5	Control	C_3	3	1	8	1.8	NA	QEP2_210813_AB_153
Q8N3U4;Q9UJ98;Q8TBR4	Q8N3U4	Cohesin subunit SA-2	STAG2 exon32?	LRPEDSFMSVYPMQTEHHQTPLDYNRR_4	Control	C_3	3	1	8	1.8	NA	QEP2_210813_AB_153
Q8N3U4;Q9UJ98;Q8TBR4	Q8N3U4	Cohesin subunit SA-2	STAG2 exon32?	LRPEDSFMSVYPMQTEHHQTPLDYNRR_5	Control	C_3	3	1	8	1.8	NA	QEP2_210813_AB_153
Q8N3U4;Q9UJ98;Q8TBR4	Q8N3U4	Cohesin subunit SA-2	STAG2 exon32?	LRPEDSFMSVYPMQTEHHQTPLDYNRR_6	Control	C_3	3	1	8	1.8	NA	QEP2_210813_AB_153
Q8N3U4;Q9UJ98;Q8TBR4	Q8N3U4	Cohesin subunit SA-2	STAG2 exon32?	RLRPEDSFM(Oxidation (M))SVYPM(Oxidation (M))QTEHHQTPLDYNR_5	Control	C_3	3	1	8	1.8	NA	QEP2_210813_AB_153
Q8N3U4;Q9UJ98;Q8TBR4	Q8N3U4	Cohesin subunit SA-2	STAG2 exon32?	RLRPEDSFMSVYPM(Oxidation (M))QTEHHQTPLDYNR_4	Control	C_3	3	1	8	1.8	NA	QEP2_210813_AB_153
Q8N3U4;Q9UJ98;Q8TBR4	Q8N3U4	Cohesin subunit SA-2	STAG2 exon32?	RLRPEDSFMSVYPM(Oxidation (M))QTEHHQTPLDYNR_5	Control	C_3	3	1	8	1.8	NA	QEP2_210813_AB_153
Q8N3U4;Q9UJ98;Q8TBR4	Q8N3U4	Cohesin subunit SA-2	STAG2 exon32?	RLRPEDSFMSVYPMQTEHHQTPLDYNR_4	Control	C_3	3	1	8	1.8	NA	QEP2_210813_AB_153
Q8N3U4;Q9UJ98;Q8TBR4	Q8N3U4	Cohesin subunit SA-2	STAG2 exon32?	RLRPEDSFMSVYPMQTEHHQTPLDYNR_5	Control	C_3	3	1	8	1.8	NA	QEP2_210813_AB_153
Q8N3U4;Q9UJ98;Q8TBR4	Q8N3U4	Cohesin subunit SA-2	STAG2 exon32?	LRPEDSFM(Oxidation (M))SVYPM(Oxidation (M))QTEHHQTPLDYNR_4	Short	S_1	4	2	1	2.1	25.5879	QEP2_210813_AB_125
Q8N3U4;Q9UJ98;Q8TBR4	Q8N3U4	Cohesin subunit SA-2	STAG2 exon32?	LRPEDSFM(Oxidation (M))SVYPMQTEHHQTPLDYNR_4	Short	S_1	4	2	1	2.1	27.6125	QEP2_210813_AB_125
Q8N3U4;Q9UJ98;Q8TBR4	Q8N3U4	Cohesin subunit SA-2	STAG2 exon32?	LRPEDSFM(Oxidation (M))SVYPMQTEHHQTPLDYNR_5	Short	S_1	4	2	1	2.1	25.9364	QEP2_210813_AB_125
Q8N3U4;Q9UJ98;Q8TBR4	Q8N3U4	Cohesin subunit SA-2	STAG2 exon32?	LRPEDSFM(Oxidation (M))SVYPMQTEHHQTPLDYNRR_4	Short	S_1	4	2	1	2.1	26.2928	QEP2_210813_AB_125
Q8N3U4;Q9UJ98;Q8TBR4	Q8N3U4	Cohesin subunit SA-2	STAG2 exon32?	LRPEDSFM(Oxidation (M))SVYPMQTEHHQTPLDYNRR_5	Short	S_1	4	2	1	2.1	26.275	QEP2_210813_AB_125
Q8N3U4;Q9UJ98;Q8TBR4	Q8N3U4	Cohesin subunit SA-2	STAG2 exon32?	LRPEDSFM(Oxidation (M))SVYPMQTEHHQTPLDYNRR_6	Short	S_1	4	2	1	2.1	23.6612	QEP2_210813_AB_125
Q8N3U4;Q9UJ98;Q8TBR4	Q8N3U4	Cohesin subunit SA-2	STAG2 exon32?	LRPEDSFMSVYPM(Oxidation (M))QTEHHQTPLDYNR_3	Short	S_1	4	2	1	2.1	24.0931	QEP2_210813_AB_125
Q8N3U4;Q9UJ98;Q8TBR4	Q8N3U4	Cohesin subunit SA-2	STAG2 exon32?	LRPEDSFMSVYPM(Oxidation (M))QTEHHQTPLDYNR_4	Short	S_1	4	2	1	2.1	27.3101	QEP2_210813_AB_125
Q8N3U4;Q9UJ98;Q8TBR4	Q8N3U4	Cohesin subunit SA-2	STAG2 exon32?	LRPEDSFMSVYPMQTEHHQTPLDYNR_3	Short	S_1	4	2	1	2.1	28.8424	QEP2_210813_AB_125
Q8N3U4;Q9UJ98;Q8TBR4	Q8N3U4	Cohesin subunit SA-2	STAG2 exon32?	LRPEDSFMSVYPMQTEHHQTPLDYNR_4	Short	S_1	4	2	1	2.1	24.9239	QEP2_210813_AB_125
Q8N3U4;Q9UJ98;Q8TBR4	Q8N3U4	Cohesin subunit SA-2	STAG2 exon32?	LRPEDSFMSVYPMQTEHHQTPLDYNR_5	Short	S_1	4	2	1	2.1	29.8629	QEP2_210813_AB_125
Q8N3U4;Q9UJ98;Q8TBR4	Q8N3U4	Cohesin subunit SA-2	STAG2 exon32?	LRPEDSFMSVYPMQTEHHQTPLDYNRR_4	Short	S_1	4	2	1	2.1	22.6749	QEP2_210813_AB_125
Q8N3U4;Q9UJ98;Q8TBR4	Q8N3U4	Cohesin subunit SA-2	STAG2 exon32?	LRPEDSFMSVYPMQTEHHQTPLDYNRR_5	Short	S_1	4	2	1	2.1	23.5343	QEP2_210813_AB_125
Q8N3U4;Q9UJ98;Q8TBR4	Q8N3U4	Cohesin subunit SA-2	STAG2 exon32?	LRPEDSFMSVYPMQTEHHQTPLDYNRR_6	Short	S_1	4	2	1	2.1	27.3151	QEP2_210813_AB_125
Q8N3U4;Q9UJ98;Q8TBR4	Q8N3U4	Cohesin subunit SA-2	STAG2 exon32?	RLRPEDSFM(Oxidation (M))SVYPM(Oxidation (M))QTEHHQTPLDYNR_5	Short	S_1	4	2	1	2.1	24.2291	QEP2_210813_AB_125
Q8N3U4;Q9UJ98;Q8TBR4	Q8N3U4	Cohesin subunit SA-2	STAG2 exon32?	RLRPEDSFMSVYPM(Oxidation (M))QTEHHQTPLDYNR_4	Short	S_1	4	2	1	2.1	25.3781	QEP2_210813_AB_125
Q8N3U4;Q9UJ98;Q8TBR4	Q8N3U4	Cohesin subunit SA-2	STAG2 exon32?	RLRPEDSFMSVYPM(Oxidation (M))QTEHHQTPLDYNR_5	Short	S_1	4	2	1	2.1	25.9345	QEP2_210813_AB_125
Q8N3U4;Q9UJ98;Q8TBR4	Q8N3U4	Cohesin subunit SA-2	STAG2 exon32?	RLRPEDSFMSVYPMQTEHHQTPLDYNR_4	Short	S_1	4	2	1	2.1	28.8101	QEP2_210813_AB_125
Q8N3U4;Q9UJ98;Q8TBR4	Q8N3U4	Cohesin subunit SA-2	STAG2 exon32?	RLRPEDSFMSVYPMQTEHHQTPLDYNR_5	Short	S_1	4	2	1	2.1	26.2482	QEP2_210813_AB_125
Q8N3U4;Q9UJ98;Q8TBR4	Q8N3U4	Cohesin subunit SA-2	STAG2 exon32?	LRPEDSFM(Oxidation (M))SVYPM(Oxidation (M))QTEHHQTPLDYNR_4	Short	S_2	5	2	6	2.6	23.4548	QEP2_210813_AB_145
Q8N3U4;Q9UJ98;Q8TBR4	Q8N3U4	Cohesin subunit SA-2	STAG2 exon32?	LRPEDSFM(Oxidation (M))SVYPMQTEHHQTPLDYNR_4	Short	S_2	5	2	6	2.6	26.5123	QEP2_210813_AB_145
Q8N3U4;Q9UJ98;Q8TBR4	Q8N3U4	Cohesin subunit SA-2	STAG2 exon32?	LRPEDSFM(Oxidation (M))SVYPMQTEHHQTPLDYNR_5	Short	S_2	5	2	6	2.6	24.872	QEP2_210813_AB_145
Q8N3U4;Q9UJ98;Q8TBR4	Q8N3U4	Cohesin subunit SA-2	STAG2 exon32?	LRPEDSFM(Oxidation (M))SVYPMQTEHHQTPLDYNRR_4	Short	S_2	5	2	6	2.6	22.8491	QEP2_210813_AB_145
Q8N3U4;Q9UJ98;Q8TBR4	Q8N3U4	Cohesin subunit SA-2	STAG2 exon32?	LRPEDSFM(Oxidation (M))SVYPMQTEHHQTPLDYNRR_5	Short	S_2	5	2	6	2.6	25.9765	QEP2_210813_AB_145
Q8N3U4;Q9UJ98;Q8TBR4	Q8N3U4	Cohesin subunit SA-2	STAG2 exon32?	LRPEDSFM(Oxidation (M))SVYPMQTEHHQTPLDYNRR_6	Short	S_2	5	2	6	2.6	23.8157	QEP2_210813_AB_145
Q8N3U4;Q9UJ98;Q8TBR4	Q8N3U4	Cohesin subunit SA-2	STAG2 exon32?	LRPEDSFMSVYPM(Oxidation (M))QTEHHQTPLDYNR_3	Short	S_2	5	2	6	2.6	22.6874	QEP2_210813_AB_145
Q8N3U4;Q9UJ98;Q8TBR4	Q8N3U4	Cohesin subunit SA-2	STAG2 exon32?	LRPEDSFMSVYPM(Oxidation (M))QTEHHQTPLDYNR_4	Short	S_2	5	2	6	2.6	26.444	QEP2_210813_AB_145
Q8N3U4;Q9UJ98;Q8TBR4	Q8N3U4	Cohesin subunit SA-2	STAG2 exon32?	LRPEDSFMSVYPMQTEHHQTPLDYNR_3	Short	S_2	5	2	6	2.6	26.7747	QEP2_210813_AB_145
Q8N3U4;Q9UJ98;Q8TBR4	Q8N3U4	Cohesin subunit SA-2	STAG2 exon32?	LRPEDSFMSVYPMQTEHHQTPLDYNR_4	Short	S_2	5	2	6	2.6	24.396	QEP2_210813_AB_145
Q8N3U4;Q9UJ98;Q8TBR4	Q8N3U4	Cohesin subunit SA-2	STAG2 exon32?	LRPEDSFMSVYPMQTEHHQTPLDYNR_5	Short	S_2	5	2	6	2.6	28.398	QEP2_210813_AB_145
Q8N3U4;Q9UJ98;Q8TBR4	Q8N3U4	Cohesin subunit SA-2	STAG2 exon32?	LRPEDSFMSVYPMQTEHHQTPLDYNRR_4	Short	S_2	5	2	6	2.6	26.4818	QEP2_210813_AB_145
Q8N3U4;Q9UJ98;Q8TBR4	Q8N3U4	Cohesin subunit SA-2	STAG2 exon32?	LRPEDSFMSVYPMQTEHHQTPLDYNRR_5	Short	S_2	5	2	6	2.6	27.4967	QEP2_210813_AB_145
Q8N3U4;Q9UJ98;Q8TBR4	Q8N3U4	Cohesin subunit SA-2	STAG2 exon32?	LRPEDSFMSVYPMQTEHHQTPLDYNRR_6	Short	S_2	5	2	6	2.6	25.2451	QEP2_210813_AB_145
Q8N3U4;Q9UJ98;Q8TBR4	Q8N3U4	Cohesin subunit SA-2	STAG2 exon32?	RLRPEDSFM(Oxidation (M))SVYPM(Oxidation (M))QTEHHQTPLDYNR_5	Short	S_2	5	2	6	2.6	22.3089	QEP2_210813_AB_145
Q8N3U4;Q9UJ98;Q8TBR4	Q8N3U4	Cohesin subunit SA-2	STAG2 exon32?	RLRPEDSFMSVYPM(Oxidation (M))QTEHHQTPLDYNR_4	Short	S_2	5	2	6	2.6	24.4594	QEP2_210813_AB_145
Q8N3U4;Q9UJ98;Q8TBR4	Q8N3U4	Cohesin subunit SA-2	STAG2 exon32?	RLRPEDSFMSVYPM(Oxidation (M))QTEHHQTPLDYNR_5	Short	S_2	5	2	6	2.6	25.4139	QEP2_210813_AB_145
Q8N3U4;Q9UJ98;Q8TBR4	Q8N3U4	Cohesin subunit SA-2	STAG2 exon32?	RLRPEDSFMSVYPMQTEHHQTPLDYNR_4	Short	S_2	5	2	6	2.6	26.2433	QEP2_210813_AB_145
Q8N3U4;Q9UJ98;Q8TBR4	Q8N3U4	Cohesin subunit SA-2	STAG2 exon32?	RLRPEDSFMSVYPMQTEHHQTPLDYNR_5	Short	S_2	5	2	6	2.6	27.0648	QEP2_210813_AB_145
Q8N3U4;Q9UJ98;Q8TBR4	Q8N3U4	Cohesin subunit SA-2	STAG2 exon32?	LRPEDSFM(Oxidation (M))SVYPM(Oxidation (M))QTEHHQTPLDYNR_4	Short	S_3	6	2	9	2.9	23.8983	QEP2_210813_AB_157
Q8N3U4;Q9UJ98;Q8TBR4	Q8N3U4	Cohesin subunit SA-2	STAG2 exon32?	LRPEDSFM(Oxidation (M))SVYPMQTEHHQTPLDYNR_4	Short	S_3	6	2	9	2.9	25.9851	QEP2_210813_AB_157
Q8N3U4;Q9UJ98;Q8TBR4	Q8N3U4	Cohesin subunit SA-2	STAG2 exon32?	LRPEDSFM(Oxidation (M))SVYPMQTEHHQTPLDYNR_5	Short	S_3	6	2	9	2.9	24.5879	QEP2_210813_AB_157
Q8N3U4;Q9UJ98;Q8TBR4	Q8N3U4	Cohesin subunit SA-2	STAG2 exon32?	LRPEDSFM(Oxidation (M))SVYPMQTEHHQTPLDYNRR_4	Short	S_3	6	2	9	2.9	24.0547	QEP2_210813_AB_157
Q8N3U4;Q9UJ98;Q8TBR4	Q8N3U4	Cohesin subunit SA-2	STAG2 exon32?	LRPEDSFM(Oxidation (M))SVYPMQTEHHQTPLDYNRR_5	Short	S_3	6	2	9	2.9	24.8052	QEP2_210813_AB_157
Q8N3U4;Q9UJ98;Q8TBR4	Q8N3U4	Cohesin subunit SA-2	STAG2 exon32?	LRPEDSFM(Oxidation (M))SVYPMQTEHHQTPLDYNRR_6	Short	S_3	6	2	9	2.9	22.9447	QEP2_210813_AB_157
Q8N3U4;Q9UJ98;Q8TBR4	Q8N3U4	Cohesin subunit SA-2	STAG2 exon32?	LRPEDSFMSVYPM(Oxidation (M))QTEHHQTPLDYNR_3	Short	S_3	6	2	9	2.9	21.8311	QEP2_210813_AB_157
Q8N3U4;Q9UJ98;Q8TBR4	Q8N3U4	Cohesin subunit SA-2	STAG2 exon32?	LRPEDSFMSVYPM(Oxidation (M))QTEHHQTPLDYNR_4	Short	S_3	6	2	9	2.9	25.6363	QEP2_210813_AB_157
Q8N3U4;Q9UJ98;Q8TBR4	Q8N3U4	Cohesin subunit SA-2	STAG2 exon32?	LRPEDSFMSVYPMQTEHHQTPLDYNR_3	Short	S_3	6	2	9	2.9	26.4894	QEP2_210813_AB_157
Q8N3U4;Q9UJ98;Q8TBR4	Q8N3U4	Cohesin subunit SA-2	STAG2 exon32?	LRPEDSFMSVYPMQTEHHQTPLDYNR_4	Short	S_3	6	2	9	2.9	24.5839	QEP2_210813_AB_157
Q8N3U4;Q9UJ98;Q8TBR4	Q8N3U4	Cohesin subunit SA-2	STAG2 exon32?	LRPEDSFMSVYPMQTEHHQTPLDYNR_5	Short	S_3	6	2	9	2.9	28.4352	QEP2_210813_AB_157
Q8N3U4;Q9UJ98;Q8TBR4	Q8N3U4	Cohesin subunit SA-2	STAG2 exon32?	LRPEDSFMSVYPMQTEHHQTPLDYNRR_4	Short	S_3	6	2	9	2.9	25.4325	QEP2_210813_AB_157
Q8N3U4;Q9UJ98;Q8TBR4	Q8N3U4	Cohesin subunit SA-2	STAG2 exon32?	LRPEDSFMSVYPMQTEHHQTPLDYNRR_5	Short	S_3	6	2	9	2.9	26.5926	QEP2_210813_AB_157
Q8N3U4;Q9UJ98;Q8TBR4	Q8N3U4	Cohesin subunit SA-2	STAG2 exon32?	LRPEDSFMSVYPMQTEHHQTPLDYNRR_6	Short	S_3	6	2	9	2.9	24.5955	QEP2_210813_AB_157
Q8N3U4;Q9UJ98;Q8TBR4	Q8N3U4	Cohesin subunit SA-2	STAG2 exon32?	RLRPEDSFM(Oxidation (M))SVYPM(Oxidation (M))QTEHHQTPLDYNR_5	Short	S_3	6	2	9	2.9	21.897	QEP2_210813_AB_157
Q8N3U4;Q9UJ98;Q8TBR4	Q8N3U4	Cohesin subunit SA-2	STAG2 exon32?	RLRPEDSFMSVYPM(Oxidation (M))QTEHHQTPLDYNR_4	Short	S_3	6	2	9	2.9	23.747	QEP2_210813_AB_157
Q8N3U4;Q9UJ98;Q8TBR4	Q8N3U4	Cohesin subunit SA-2	STAG2 exon32?	RLRPEDSFMSVYPM(Oxidation (M))QTEHHQTPLDYNR_5	Short	S_3	6	2	9	2.9	21.9167	QEP2_210813_AB_157
Q8N3U4;Q9UJ98;Q8TBR4	Q8N3U4	Cohesin subunit SA-2	STAG2 exon32?	RLRPEDSFMSVYPMQTEHHQTPLDYNR_4	Short	S_3	6	2	9	2.9	25.3714	QEP2_210813_AB_157
Q8N3U4;Q9UJ98;Q8TBR4	Q8N3U4	Cohesin subunit SA-2	STAG2 exon32?	RLRPEDSFMSVYPMQTEHHQTPLDYNR_5	Short	S_3	6	2	9	2.9	25.692	QEP2_210813_AB_157
Q8N3U4;Q9UJ98;Q8TBR4	Q8N3U4	Cohesin subunit SA-2	STAG2 exon32?	LRPEDSFM(Oxidation (M))SVYPM(Oxidation (M))QTEHHQTPLDYNR_4	Long	L_1	7	3	2	3.2	NA	QEP2_210813_AB_129
Q8N3U4;Q9UJ98;Q8TBR4	Q8N3U4	Cohesin subunit SA-2	STAG2 exon32?	LRPEDSFM(Oxidation (M))SVYPMQTEHHQTPLDYNR_4	Long	L_1	7	3	2	3.2	NA	QEP2_210813_AB_129
Q8N3U4;Q9UJ98;Q8TBR4	Q8N3U4	Cohesin subunit SA-2	STAG2 exon32?	LRPEDSFM(Oxidation (M))SVYPMQTEHHQTPLDYNR_5	Long	L_1	7	3	2	3.2	NA	QEP2_210813_AB_129
Q8N3U4;Q9UJ98;Q8TBR4	Q8N3U4	Cohesin subunit SA-2	STAG2 exon32?	LRPEDSFM(Oxidation (M))SVYPMQTEHHQTPLDYNRR_4	Long	L_1	7	3	2	3.2	NA	QEP2_210813_AB_129
Q8N3U4;Q9UJ98;Q8TBR4	Q8N3U4	Cohesin subunit SA-2	STAG2 exon32?	LRPEDSFM(Oxidation (M))SVYPMQTEHHQTPLDYNRR_5	Long	L_1	7	3	2	3.2	NA	QEP2_210813_AB_129
Q8N3U4;Q9UJ98;Q8TBR4	Q8N3U4	Cohesin subunit SA-2	STAG2 exon32?	LRPEDSFM(Oxidation (M))SVYPMQTEHHQTPLDYNRR_6	Long	L_1	7	3	2	3.2	NA	QEP2_210813_AB_129
Q8N3U4;Q9UJ98;Q8TBR4	Q8N3U4	Cohesin subunit SA-2	STAG2 exon32?	LRPEDSFMSVYPM(Oxidation (M))QTEHHQTPLDYNR_3	Long	L_1	7	3	2	3.2	NA	QEP2_210813_AB_129
Q8N3U4;Q9UJ98;Q8TBR4	Q8N3U4	Cohesin subunit SA-2	STAG2 exon32?	LRPEDSFMSVYPM(Oxidation (M))QTEHHQTPLDYNR_4	Long	L_1	7	3	2	3.2	NA	QEP2_210813_AB_129
Q8N3U4;Q9UJ98;Q8TBR4	Q8N3U4	Cohesin subunit SA-2	STAG2 exon32?	LRPEDSFMSVYPMQTEHHQTPLDYNR_3	Long	L_1	7	3	2	3.2	NA	QEP2_210813_AB_129
Q8N3U4;Q9UJ98;Q8TBR4	Q8N3U4	Cohesin subunit SA-2	STAG2 exon32?	LRPEDSFMSVYPMQTEHHQTPLDYNR_4	Long	L_1	7	3	2	3.2	22.2274	QEP2_210813_AB_129
Q8N3U4;Q9UJ98;Q8TBR4	Q8N3U4	Cohesin subunit SA-2	STAG2 exon32?	LRPEDSFMSVYPMQTEHHQTPLDYNR_5	Long	L_1	7	3	2	3.2	NA	QEP2_210813_AB_129
Q8N3U4;Q9UJ98;Q8TBR4	Q8N3U4	Cohesin subunit SA-2	STAG2 exon32?	LRPEDSFMSVYPMQTEHHQTPLDYNRR_4	Long	L_1	7	3	2	3.2	NA	QEP2_210813_AB_129
Q8N3U4;Q9UJ98;Q8TBR4	Q8N3U4	Cohesin subunit SA-2	STAG2 exon32?	LRPEDSFMSVYPMQTEHHQTPLDYNRR_5	Long	L_1	7	3	2	3.2	NA	QEP2_210813_AB_129
Q8N3U4;Q9UJ98;Q8TBR4	Q8N3U4	Cohesin subunit SA-2	STAG2 exon32?	LRPEDSFMSVYPMQTEHHQTPLDYNRR_6	Long	L_1	7	3	2	3.2	NA	QEP2_210813_AB_129
Q8N3U4;Q9UJ98;Q8TBR4	Q8N3U4	Cohesin subunit SA-2	STAG2 exon32?	RLRPEDSFM(Oxidation (M))SVYPM(Oxidation (M))QTEHHQTPLDYNR_5	Long	L_1	7	3	2	3.2	NA	QEP2_210813_AB_129
Q8N3U4;Q9UJ98;Q8TBR4	Q8N3U4	Cohesin subunit SA-2	STAG2 exon32?	RLRPEDSFMSVYPM(Oxidation (M))QTEHHQTPLDYNR_4	Long	L_1	7	3	2	3.2	NA	QEP2_210813_AB_129
Q8N3U4;Q9UJ98;Q8TBR4	Q8N3U4	Cohesin subunit SA-2	STAG2 exon32?	RLRPEDSFMSVYPM(Oxidation (M))QTEHHQTPLDYNR_5	Long	L_1	7	3	2	3.2	NA	QEP2_210813_AB_129
Q8N3U4;Q9UJ98;Q8TBR4	Q8N3U4	Cohesin subunit SA-2	STAG2 exon32?	RLRPEDSFMSVYPMQTEHHQTPLDYNR_4	Long	L_1	7	3	2	3.2	NA	QEP2_210813_AB_129
Q8N3U4;Q9UJ98;Q8TBR4	Q8N3U4	Cohesin subunit SA-2	STAG2 exon32?	RLRPEDSFMSVYPMQTEHHQTPLDYNR_5	Long	L_1	7	3	2	3.2	NA	QEP2_210813_AB_129
Q8N3U4;Q9UJ98;Q8TBR4	Q8N3U4	Cohesin subunit SA-2	STAG2 exon32?	LRPEDSFM(Oxidation (M))SVYPM(Oxidation (M))QTEHHQTPLDYNR_4	Long	L_2	8	3	5	3.5	NA	QEP2_210813_AB_141
Q8N3U4;Q9UJ98;Q8TBR4	Q8N3U4	Cohesin subunit SA-2	STAG2 exon32?	LRPEDSFM(Oxidation (M))SVYPMQTEHHQTPLDYNR_4	Long	L_2	8	3	5	3.5	NA	QEP2_210813_AB_141
Q8N3U4;Q9UJ98;Q8TBR4	Q8N3U4	Cohesin subunit SA-2	STAG2 exon32?	LRPEDSFM(Oxidation (M))SVYPMQTEHHQTPLDYNR_5	Long	L_2	8	3	5	3.5	NA	QEP2_210813_AB_141
Q8N3U4;Q9UJ98;Q8TBR4	Q8N3U4	Cohesin subunit SA-2	STAG2 exon32?	LRPEDSFM(Oxidation (M))SVYPMQTEHHQTPLDYNRR_4	Long	L_2	8	3	5	3.5	NA	QEP2_210813_AB_141
Q8N3U4;Q9UJ98;Q8TBR4	Q8N3U4	Cohesin subunit SA-2	STAG2 exon32?	LRPEDSFM(Oxidation (M))SVYPMQTEHHQTPLDYNRR_5	Long	L_2	8	3	5	3.5	NA	QEP2_210813_AB_141
Q8N3U4;Q9UJ98;Q8TBR4	Q8N3U4	Cohesin subunit SA-2	STAG2 exon32?	LRPEDSFM(Oxidation (M))SVYPMQTEHHQTPLDYNRR_6	Long	L_2	8	3	5	3.5	NA	QEP2_210813_AB_141
Q8N3U4;Q9UJ98;Q8TBR4	Q8N3U4	Cohesin subunit SA-2	STAG2 exon32?	LRPEDSFMSVYPM(Oxidation (M))QTEHHQTPLDYNR_3	Long	L_2	8	3	5	3.5	NA	QEP2_210813_AB_141
Q8N3U4;Q9UJ98;Q8TBR4	Q8N3U4	Cohesin subunit SA-2	STAG2 exon32?	LRPEDSFMSVYPM(Oxidation (M))QTEHHQTPLDYNR_4	Long	L_2	8	3	5	3.5	NA	QEP2_210813_AB_141
Q8N3U4;Q9UJ98;Q8TBR4	Q8N3U4	Cohesin subunit SA-2	STAG2 exon32?	LRPEDSFMSVYPMQTEHHQTPLDYNR_3	Long	L_2	8	3	5	3.5	NA	QEP2_210813_AB_141
Q8N3U4;Q9UJ98;Q8TBR4	Q8N3U4	Cohesin subunit SA-2	STAG2 exon32?	LRPEDSFMSVYPMQTEHHQTPLDYNR_4	Long	L_2	8	3	5	3.5	NA	QEP2_210813_AB_141
Q8N3U4;Q9UJ98;Q8TBR4	Q8N3U4	Cohesin subunit SA-2	STAG2 exon32?	LRPEDSFMSVYPMQTEHHQTPLDYNR_5	Long	L_2	8	3	5	3.5	NA	QEP2_210813_AB_141
Q8N3U4;Q9UJ98;Q8TBR4	Q8N3U4	Cohesin subunit SA-2	STAG2 exon32?	LRPEDSFMSVYPMQTEHHQTPLDYNRR_4	Long	L_2	8	3	5	3.5	NA	QEP2_210813_AB_141
Q8N3U4;Q9UJ98;Q8TBR4	Q8N3U4	Cohesin subunit SA-2	STAG2 exon32?	LRPEDSFMSVYPMQTEHHQTPLDYNRR_5	Long	L_2	8	3	5	3.5	NA	QEP2_210813_AB_141
Q8N3U4;Q9UJ98;Q8TBR4	Q8N3U4	Cohesin subunit SA-2	STAG2 exon32?	LRPEDSFMSVYPMQTEHHQTPLDYNRR_6	Long	L_2	8	3	5	3.5	NA	QEP2_210813_AB_141
Q8N3U4;Q9UJ98;Q8TBR4	Q8N3U4	Cohesin subunit SA-2	STAG2 exon32?	RLRPEDSFM(Oxidation (M))SVYPM(Oxidation (M))QTEHHQTPLDYNR_5	Long	L_2	8	3	5	3.5	NA	QEP2_210813_AB_141
Q8N3U4;Q9UJ98;Q8TBR4	Q8N3U4	Cohesin subunit SA-2	STAG2 exon32?	RLRPEDSFMSVYPM(Oxidation (M))QTEHHQTPLDYNR_4	Long	L_2	8	3	5	3.5	NA	QEP2_210813_AB_141
Q8N3U4;Q9UJ98;Q8TBR4	Q8N3U4	Cohesin subunit SA-2	STAG2 exon32?	RLRPEDSFMSVYPM(Oxidation (M))QTEHHQTPLDYNR_5	Long	L_2	8	3	5	3.5	NA	QEP2_210813_AB_141
Q8N3U4;Q9UJ98;Q8TBR4	Q8N3U4	Cohesin subunit SA-2	STAG2 exon32?	RLRPEDSFMSVYPMQTEHHQTPLDYNR_4	Long	L_2	8	3	5	3.5	NA	QEP2_210813_AB_141
Q8N3U4;Q9UJ98;Q8TBR4	Q8N3U4	Cohesin subunit SA-2	STAG2 exon32?	RLRPEDSFMSVYPMQTEHHQTPLDYNR_5	Long	L_2	8	3	5	3.5	NA	QEP2_210813_AB_141
Q8N3U4;Q9UJ98;Q8TBR4	Q8N3U4	Cohesin subunit SA-2	STAG2 exon32?	LRPEDSFM(Oxidation (M))SVYPM(Oxidation (M))QTEHHQTPLDYNR_4	Long	L_3	9	3	7	3.7	NA	QEP2_210813_AB_149
Q8N3U4;Q9UJ98;Q8TBR4	Q8N3U4	Cohesin subunit SA-2	STAG2 exon32?	LRPEDSFM(Oxidation (M))SVYPMQTEHHQTPLDYNR_4	Long	L_3	9	3	7	3.7	NA	QEP2_210813_AB_149
Q8N3U4;Q9UJ98;Q8TBR4	Q8N3U4	Cohesin subunit SA-2	STAG2 exon32?	LRPEDSFM(Oxidation (M))SVYPMQTEHHQTPLDYNR_5	Long	L_3	9	3	7	3.7	NA	QEP2_210813_AB_149
Q8N3U4;Q9UJ98;Q8TBR4	Q8N3U4	Cohesin subunit SA-2	STAG2 exon32?	LRPEDSFM(Oxidation (M))SVYPMQTEHHQTPLDYNRR_4	Long	L_3	9	3	7	3.7	NA	QEP2_210813_AB_149
Q8N3U4;Q9UJ98;Q8TBR4	Q8N3U4	Cohesin subunit SA-2	STAG2 exon32?	LRPEDSFM(Oxidation (M))SVYPMQTEHHQTPLDYNRR_5	Long	L_3	9	3	7	3.7	NA	QEP2_210813_AB_149
Q8N3U4;Q9UJ98;Q8TBR4	Q8N3U4	Cohesin subunit SA-2	STAG2 exon32?	LRPEDSFM(Oxidation (M))SVYPMQTEHHQTPLDYNRR_6	Long	L_3	9	3	7	3.7	NA	QEP2_210813_AB_149
Q8N3U4;Q9UJ98;Q8TBR4	Q8N3U4	Cohesin subunit SA-2	STAG2 exon32?	LRPEDSFMSVYPM(Oxidation (M))QTEHHQTPLDYNR_3	Long	L_3	9	3	7	3.7	NA	QEP2_210813_AB_149
Q8N3U4;Q9UJ98;Q8TBR4	Q8N3U4	Cohesin subunit SA-2	STAG2 exon32?	LRPEDSFMSVYPM(Oxidation (M))QTEHHQTPLDYNR_4	Long	L_3	9	3	7	3.7	NA	QEP2_210813_AB_149
Q8N3U4;Q9UJ98;Q8TBR4	Q8N3U4	Cohesin subunit SA-2	STAG2 exon32?	LRPEDSFMSVYPMQTEHHQTPLDYNR_3	Long	L_3	9	3	7	3.7	NA	QEP2_210813_AB_149
Q8N3U4;Q9UJ98;Q8TBR4	Q8N3U4	Cohesin subunit SA-2	STAG2 exon32?	LRPEDSFMSVYPMQTEHHQTPLDYNR_4	Long	L_3	9	3	7	3.7	NA	QEP2_210813_AB_149
Q8N3U4;Q9UJ98;Q8TBR4	Q8N3U4	Cohesin subunit SA-2	STAG2 exon32?	LRPEDSFMSVYPMQTEHHQTPLDYNR_5	Long	L_3	9	3	7	3.7	NA	QEP2_210813_AB_149
Q8N3U4;Q9UJ98;Q8TBR4	Q8N3U4	Cohesin subunit SA-2	STAG2 exon32?	LRPEDSFMSVYPMQTEHHQTPLDYNRR_4	Long	L_3	9	3	7	3.7	NA	QEP2_210813_AB_149
Q8N3U4;Q9UJ98;Q8TBR4	Q8N3U4	Cohesin subunit SA-2	STAG2 exon32?	LRPEDSFMSVYPMQTEHHQTPLDYNRR_5	Long	L_3	9	3	7	3.7	NA	QEP2_210813_AB_149
Q8N3U4;Q9UJ98;Q8TBR4	Q8N3U4	Cohesin subunit SA-2	STAG2 exon32?	LRPEDSFMSVYPMQTEHHQTPLDYNRR_6	Long	L_3	9	3	7	3.7	NA	QEP2_210813_AB_149
Q8N3U4;Q9UJ98;Q8TBR4	Q8N3U4	Cohesin subunit SA-2	STAG2 exon32?	RLRPEDSFM(Oxidation (M))SVYPM(Oxidation (M))QTEHHQTPLDYNR_5	Long	L_3	9	3	7	3.7	NA	QEP2_210813_AB_149
Q8N3U4;Q9UJ98;Q8TBR4	Q8N3U4	Cohesin subunit SA-2	STAG2 exon32?	RLRPEDSFMSVYPM(Oxidation (M))QTEHHQTPLDYNR_4	Long	L_3	9	3	7	3.7	NA	QEP2_210813_AB_149
Q8N3U4;Q9UJ98;Q8TBR4	Q8N3U4	Cohesin subunit SA-2	STAG2 exon32?	RLRPEDSFMSVYPM(Oxidation (M))QTEHHQTPLDYNR_5	Long	L_3	9	3	7	3.7	NA	QEP2_210813_AB_149
Q8N3U4;Q9UJ98;Q8TBR4	Q8N3U4	Cohesin subunit SA-2	STAG2 exon32?	RLRPEDSFMSVYPMQTEHHQTPLDYNR_4	Long	L_3	9	3	7	3.7	NA	QEP2_210813_AB_149
Q8N3U4;Q9UJ98;Q8TBR4	Q8N3U4	Cohesin subunit SA-2	STAG2 exon32?	RLRPEDSFMSVYPMQTEHHQTPLDYNR_5	Long	L_3	9	3	7	3.7	NA	QEP2_210813_AB_149
Q8N3U4-2	Q8N3U4	Cohesin subunit SA-2	STAG2_FL	LRPEDSFM(Oxidation (M))SVYPM(Oxidation (M))QTEHHQTPLDYNTQVTWMLAQR_5	Control	C_1	1	1	3	1.3	NA	QEP2_210813_AB_133
Q8N3U4-2	Q8N3U4	Cohesin subunit SA-2	STAG2_FL	LRPEDSFM(Oxidation (M))SVYPMQTEHHQTPLDYNTQVTWMLAQR_4	Control	C_1	1	1	3	1.3	NA	QEP2_210813_AB_133
Q8N3U4-2	Q8N3U4	Cohesin subunit SA-2	STAG2_FL	LRPEDSFMSVYPM(Oxidation (M))QTEHHQTPLDYNTQVTWMLAQR_4	Control	C_1	1	1	3	1.3	NA	QEP2_210813_AB_133
Q8N3U4-2	Q8N3U4	Cohesin subunit SA-2	STAG2_FL	LRPEDSFMSVYPM(Oxidation (M))QTEHHQTPLDYNTQVTWMLAQR_5	Control	C_1	1	1	3	1.3	NA	QEP2_210813_AB_133
Q8N3U4-2	Q8N3U4	Cohesin subunit SA-2	STAG2_FL	LRPEDSFMSVYPMQTEHHQTPLDYNTQVTWM(Oxidation (M))LAQR_4	Control	C_1	1	1	3	1.3	NA	QEP2_210813_AB_133
Q8N3U4-2	Q8N3U4	Cohesin subunit SA-2	STAG2_FL	LRPEDSFMSVYPMQTEHHQTPLDYNTQVTWM(Oxidation (M))LAQR_5	Control	C_1	1	1	3	1.3	NA	QEP2_210813_AB_133
Q8N3U4-2	Q8N3U4	Cohesin subunit SA-2	STAG2_FL	LRPEDSFMSVYPMQTEHHQTPLDYNTQVTWMLAQR_4	Control	C_1	1	1	3	1.3	NA	QEP2_210813_AB_133
Q8N3U4-2	Q8N3U4	Cohesin subunit SA-2	STAG2_FL	LRPEDSFMSVYPMQTEHHQTPLDYNTQVTWMLAQR_5	Control	C_1	1	1	3	1.3	NA	QEP2_210813_AB_133
Q8N3U4-2	Q8N3U4	Cohesin subunit SA-2	STAG2_FL	LRTNLQHAIR_2	Control	C_1	1	1	3	1.3	NA	QEP2_210813_AB_133
Q8N3U4-2	Q8N3U4	Cohesin subunit SA-2	STAG2_FL	LRTNLQHAIR_3	Control	C_1	1	1	3	1.3	NA	QEP2_210813_AB_133
Q8N3U4-2	Q8N3U4	Cohesin subunit SA-2	STAG2_FL	RLRPEDSFM(Oxidation (M))SVYPMQTEHHQTPLDYNTQVTWMLAQR_5	Control	C_1	1	1	3	1.3	NA	QEP2_210813_AB_133
Q8N3U4-2	Q8N3U4	Cohesin subunit SA-2	STAG2_FL	RLRPEDSFMSVYPM(Oxidation (M))QTEHHQTPLDYNTQVTWMLAQR_4	Control	C_1	1	1	3	1.3	NA	QEP2_210813_AB_133
Q8N3U4-2	Q8N3U4	Cohesin subunit SA-2	STAG2_FL	RLRPEDSFMSVYPM(Oxidation (M))QTEHHQTPLDYNTQVTWMLAQR_5	Control	C_1	1	1	3	1.3	NA	QEP2_210813_AB_133
Q8N3U4-2	Q8N3U4	Cohesin subunit SA-2	STAG2_FL	RLRPEDSFMSVYPM(Oxidation (M))QTEHHQTPLDYNTQVTWMLAQR_6	Control	C_1	1	1	3	1.3	NA	QEP2_210813_AB_133
Q8N3U4-2	Q8N3U4	Cohesin subunit SA-2	STAG2_FL	RLRPEDSFMSVYPMQTEHHQTPLDYNTQVTWMLAQR_4	Control	C_1	1	1	3	1.3	NA	QEP2_210813_AB_133
Q8N3U4-2	Q8N3U4	Cohesin subunit SA-2	STAG2_FL	RLRPEDSFMSVYPMQTEHHQTPLDYNTQVTWMLAQR_5	Control	C_1	1	1	3	1.3	NA	QEP2_210813_AB_133
Q8N3U4-2	Q8N3U4	Cohesin subunit SA-2	STAG2_FL	RLRPEDSFMSVYPMQTEHHQTPLDYNTQVTWMLAQR_6	Control	C_1	1	1	3	1.3	NA	QEP2_210813_AB_133
Q8N3U4-2	Q8N3U4	Cohesin subunit SA-2	STAG2_FL	TNLQHAIR_2	Control	C_1	1	1	3	1.3	NA	QEP2_210813_AB_133
Q8N3U4-2	Q8N3U4	Cohesin subunit SA-2	STAG2_FL	TNLQHAIRR_2	Control	C_1	1	1	3	1.3	NA	QEP2_210813_AB_133
Q8N3U4-2	Q8N3U4	Cohesin subunit SA-2	STAG2_FL	LRPEDSFM(Oxidation (M))SVYPM(Oxidation (M))QTEHHQTPLDYNTQVTWMLAQR_5	Control	C_2	2	1	4	1.4	NA	QEP2_210813_AB_137
Q8N3U4-2	Q8N3U4	Cohesin subunit SA-2	STAG2_FL	LRPEDSFM(Oxidation (M))SVYPMQTEHHQTPLDYNTQVTWMLAQR_4	Control	C_2	2	1	4	1.4	NA	QEP2_210813_AB_137
Q8N3U4-2	Q8N3U4	Cohesin subunit SA-2	STAG2_FL	LRPEDSFMSVYPM(Oxidation (M))QTEHHQTPLDYNTQVTWMLAQR_4	Control	C_2	2	1	4	1.4	NA	QEP2_210813_AB_137
Q8N3U4-2	Q8N3U4	Cohesin subunit SA-2	STAG2_FL	LRPEDSFMSVYPM(Oxidation (M))QTEHHQTPLDYNTQVTWMLAQR_5	Control	C_2	2	1	4	1.4	NA	QEP2_210813_AB_137
Q8N3U4-2	Q8N3U4	Cohesin subunit SA-2	STAG2_FL	LRPEDSFMSVYPMQTEHHQTPLDYNTQVTWM(Oxidation (M))LAQR_4	Control	C_2	2	1	4	1.4	NA	QEP2_210813_AB_137
Q8N3U4-2	Q8N3U4	Cohesin subunit SA-2	STAG2_FL	LRPEDSFMSVYPMQTEHHQTPLDYNTQVTWM(Oxidation (M))LAQR_5	Control	C_2	2	1	4	1.4	NA	QEP2_210813_AB_137
Q8N3U4-2	Q8N3U4	Cohesin subunit SA-2	STAG2_FL	LRPEDSFMSVYPMQTEHHQTPLDYNTQVTWMLAQR_4	Control	C_2	2	1	4	1.4	NA	QEP2_210813_AB_137
Q8N3U4-2	Q8N3U4	Cohesin subunit SA-2	STAG2_FL	LRPEDSFMSVYPMQTEHHQTPLDYNTQVTWMLAQR_5	Control	C_2	2	1	4	1.4	NA	QEP2_210813_AB_137
Q8N3U4-2	Q8N3U4	Cohesin subunit SA-2	STAG2_FL	LRTNLQHAIR_2	Control	C_2	2	1	4	1.4	NA	QEP2_210813_AB_137
Q8N3U4-2	Q8N3U4	Cohesin subunit SA-2	STAG2_FL	LRTNLQHAIR_3	Control	C_2	2	1	4	1.4	NA	QEP2_210813_AB_137
Q8N3U4-2	Q8N3U4	Cohesin subunit SA-2	STAG2_FL	RLRPEDSFM(Oxidation (M))SVYPMQTEHHQTPLDYNTQVTWMLAQR_5	Control	C_2	2	1	4	1.4	NA	QEP2_210813_AB_137
Q8N3U4-2	Q8N3U4	Cohesin subunit SA-2	STAG2_FL	RLRPEDSFMSVYPM(Oxidation (M))QTEHHQTPLDYNTQVTWMLAQR_4	Control	C_2	2	1	4	1.4	NA	QEP2_210813_AB_137
Q8N3U4-2	Q8N3U4	Cohesin subunit SA-2	STAG2_FL	RLRPEDSFMSVYPM(Oxidation (M))QTEHHQTPLDYNTQVTWMLAQR_5	Control	C_2	2	1	4	1.4	NA	QEP2_210813_AB_137
Q8N3U4-2	Q8N3U4	Cohesin subunit SA-2	STAG2_FL	RLRPEDSFMSVYPM(Oxidation (M))QTEHHQTPLDYNTQVTWMLAQR_6	Control	C_2	2	1	4	1.4	NA	QEP2_210813_AB_137
Q8N3U4-2	Q8N3U4	Cohesin subunit SA-2	STAG2_FL	RLRPEDSFMSVYPMQTEHHQTPLDYNTQVTWMLAQR_4	Control	C_2	2	1	4	1.4	NA	QEP2_210813_AB_137
Q8N3U4-2	Q8N3U4	Cohesin subunit SA-2	STAG2_FL	RLRPEDSFMSVYPMQTEHHQTPLDYNTQVTWMLAQR_5	Control	C_2	2	1	4	1.4	NA	QEP2_210813_AB_137
Q8N3U4-2	Q8N3U4	Cohesin subunit SA-2	STAG2_FL	RLRPEDSFMSVYPMQTEHHQTPLDYNTQVTWMLAQR_6	Control	C_2	2	1	4	1.4	NA	QEP2_210813_AB_137
Q8N3U4-2	Q8N3U4	Cohesin subunit SA-2	STAG2_FL	TNLQHAIR_2	Control	C_2	2	1	4	1.4	NA	QEP2_210813_AB_137
Q8N3U4-2	Q8N3U4	Cohesin subunit SA-2	STAG2_FL	TNLQHAIRR_2	Control	C_2	2	1	4	1.4	NA	QEP2_210813_AB_137
Q8N3U4-2	Q8N3U4	Cohesin subunit SA-2	STAG2_FL	LRPEDSFM(Oxidation (M))SVYPM(Oxidation (M))QTEHHQTPLDYNTQVTWMLAQR_5	Control	C_3	3	1	8	1.8	NA	QEP2_210813_AB_153
Q8N3U4-2	Q8N3U4	Cohesin subunit SA-2	STAG2_FL	LRPEDSFM(Oxidation (M))SVYPMQTEHHQTPLDYNTQVTWMLAQR_4	Control	C_3	3	1	8	1.8	NA	QEP2_210813_AB_153
Q8N3U4-2	Q8N3U4	Cohesin subunit SA-2	STAG2_FL	LRPEDSFMSVYPM(Oxidation (M))QTEHHQTPLDYNTQVTWMLAQR_4	Control	C_3	3	1	8	1.8	NA	QEP2_210813_AB_153
Q8N3U4-2	Q8N3U4	Cohesin subunit SA-2	STAG2_FL	LRPEDSFMSVYPM(Oxidation (M))QTEHHQTPLDYNTQVTWMLAQR_5	Control	C_3	3	1	8	1.8	NA	QEP2_210813_AB_153
Q8N3U4-2	Q8N3U4	Cohesin subunit SA-2	STAG2_FL	LRPEDSFMSVYPMQTEHHQTPLDYNTQVTWM(Oxidation (M))LAQR_4	Control	C_3	3	1	8	1.8	NA	QEP2_210813_AB_153
Q8N3U4-2	Q8N3U4	Cohesin subunit SA-2	STAG2_FL	LRPEDSFMSVYPMQTEHHQTPLDYNTQVTWM(Oxidation (M))LAQR_5	Control	C_3	3	1	8	1.8	NA	QEP2_210813_AB_153
Q8N3U4-2	Q8N3U4	Cohesin subunit SA-2	STAG2_FL	LRPEDSFMSVYPMQTEHHQTPLDYNTQVTWMLAQR_4	Control	C_3	3	1	8	1.8	NA	QEP2_210813_AB_153
Q8N3U4-2	Q8N3U4	Cohesin subunit SA-2	STAG2_FL	LRPEDSFMSVYPMQTEHHQTPLDYNTQVTWMLAQR_5	Control	C_3	3	1	8	1.8	NA	QEP2_210813_AB_153
Q8N3U4-2	Q8N3U4	Cohesin subunit SA-2	STAG2_FL	LRTNLQHAIR_2	Control	C_3	3	1	8	1.8	NA	QEP2_210813_AB_153
Q8N3U4-2	Q8N3U4	Cohesin subunit SA-2	STAG2_FL	LRTNLQHAIR_3	Control	C_3	3	1	8	1.8	NA	QEP2_210813_AB_153
Q8N3U4-2	Q8N3U4	Cohesin subunit SA-2	STAG2_FL	RLRPEDSFM(Oxidation (M))SVYPMQTEHHQTPLDYNTQVTWMLAQR_5	Control	C_3	3	1	8	1.8	NA	QEP2_210813_AB_153
Q8N3U4-2	Q8N3U4	Cohesin subunit SA-2	STAG2_FL	RLRPEDSFMSVYPM(Oxidation (M))QTEHHQTPLDYNTQVTWMLAQR_4	Control	C_3	3	1	8	1.8	NA	QEP2_210813_AB_153
Q8N3U4-2	Q8N3U4	Cohesin subunit SA-2	STAG2_FL	RLRPEDSFMSVYPM(Oxidation (M))QTEHHQTPLDYNTQVTWMLAQR_5	Control	C_3	3	1	8	1.8	NA	QEP2_210813_AB_153
Q8N3U4-2	Q8N3U4	Cohesin subunit SA-2	STAG2_FL	RLRPEDSFMSVYPM(Oxidation (M))QTEHHQTPLDYNTQVTWMLAQR_6	Control	C_3	3	1	8	1.8	NA	QEP2_210813_AB_153
Q8N3U4-2	Q8N3U4	Cohesin subunit SA-2	STAG2_FL	RLRPEDSFMSVYPMQTEHHQTPLDYNTQVTWMLAQR_4	Control	C_3	3	1	8	1.8	NA	QEP2_210813_AB_153
Q8N3U4-2	Q8N3U4	Cohesin subunit SA-2	STAG2_FL	RLRPEDSFMSVYPMQTEHHQTPLDYNTQVTWMLAQR_5	Control	C_3	3	1	8	1.8	NA	QEP2_210813_AB_153
Q8N3U4-2	Q8N3U4	Cohesin subunit SA-2	STAG2_FL	RLRPEDSFMSVYPMQTEHHQTPLDYNTQVTWMLAQR_6	Control	C_3	3	1	8	1.8	NA	QEP2_210813_AB_153
Q8N3U4-2	Q8N3U4	Cohesin subunit SA-2	STAG2_FL	TNLQHAIR_2	Control	C_3	3	1	8	1.8	NA	QEP2_210813_AB_153
Q8N3U4-2	Q8N3U4	Cohesin subunit SA-2	STAG2_FL	TNLQHAIRR_2	Control	C_3	3	1	8	1.8	NA	QEP2_210813_AB_153
Q8N3U4-2	Q8N3U4	Cohesin subunit SA-2	STAG2_FL	LRPEDSFM(Oxidation (M))SVYPM(Oxidation (M))QTEHHQTPLDYNTQVTWMLAQR_5	Short	S_1	4	2	1	2.1	NA	QEP2_210813_AB_125
Q8N3U4-2	Q8N3U4	Cohesin subunit SA-2	STAG2_FL	LRPEDSFM(Oxidation (M))SVYPMQTEHHQTPLDYNTQVTWMLAQR_4	Short	S_1	4	2	1	2.1	NA	QEP2_210813_AB_125
Q8N3U4-2	Q8N3U4	Cohesin subunit SA-2	STAG2_FL	LRPEDSFMSVYPM(Oxidation (M))QTEHHQTPLDYNTQVTWMLAQR_4	Short	S_1	4	2	1	2.1	NA	QEP2_210813_AB_125
Q8N3U4-2	Q8N3U4	Cohesin subunit SA-2	STAG2_FL	LRPEDSFMSVYPM(Oxidation (M))QTEHHQTPLDYNTQVTWMLAQR_5	Short	S_1	4	2	1	2.1	NA	QEP2_210813_AB_125
Q8N3U4-2	Q8N3U4	Cohesin subunit SA-2	STAG2_FL	LRPEDSFMSVYPMQTEHHQTPLDYNTQVTWM(Oxidation (M))LAQR_4	Short	S_1	4	2	1	2.1	NA	QEP2_210813_AB_125
Q8N3U4-2	Q8N3U4	Cohesin subunit SA-2	STAG2_FL	LRPEDSFMSVYPMQTEHHQTPLDYNTQVTWM(Oxidation (M))LAQR_5	Short	S_1	4	2	1	2.1	NA	QEP2_210813_AB_125
Q8N3U4-2	Q8N3U4	Cohesin subunit SA-2	STAG2_FL	LRPEDSFMSVYPMQTEHHQTPLDYNTQVTWMLAQR_4	Short	S_1	4	2	1	2.1	NA	QEP2_210813_AB_125
Q8N3U4-2	Q8N3U4	Cohesin subunit SA-2	STAG2_FL	LRPEDSFMSVYPMQTEHHQTPLDYNTQVTWMLAQR_5	Short	S_1	4	2	1	2.1	NA	QEP2_210813_AB_125
Q8N3U4-2	Q8N3U4	Cohesin subunit SA-2	STAG2_FL	LRTNLQHAIR_2	Short	S_1	4	2	1	2.1	NA	QEP2_210813_AB_125
Q8N3U4-2	Q8N3U4	Cohesin subunit SA-2	STAG2_FL	LRTNLQHAIR_3	Short	S_1	4	2	1	2.1	NA	QEP2_210813_AB_125
Q8N3U4-2	Q8N3U4	Cohesin subunit SA-2	STAG2_FL	RLRPEDSFM(Oxidation (M))SVYPMQTEHHQTPLDYNTQVTWMLAQR_5	Short	S_1	4	2	1	2.1	NA	QEP2_210813_AB_125
Q8N3U4-2	Q8N3U4	Cohesin subunit SA-2	STAG2_FL	RLRPEDSFMSVYPM(Oxidation (M))QTEHHQTPLDYNTQVTWMLAQR_4	Short	S_1	4	2	1	2.1	NA	QEP2_210813_AB_125
Q8N3U4-2	Q8N3U4	Cohesin subunit SA-2	STAG2_FL	RLRPEDSFMSVYPM(Oxidation (M))QTEHHQTPLDYNTQVTWMLAQR_5	Short	S_1	4	2	1	2.1	NA	QEP2_210813_AB_125
Q8N3U4-2	Q8N3U4	Cohesin subunit SA-2	STAG2_FL	RLRPEDSFMSVYPM(Oxidation (M))QTEHHQTPLDYNTQVTWMLAQR_6	Short	S_1	4	2	1	2.1	NA	QEP2_210813_AB_125
Q8N3U4-2	Q8N3U4	Cohesin subunit SA-2	STAG2_FL	RLRPEDSFMSVYPMQTEHHQTPLDYNTQVTWMLAQR_4	Short	S_1	4	2	1	2.1	NA	QEP2_210813_AB_125
Q8N3U4-2	Q8N3U4	Cohesin subunit SA-2	STAG2_FL	RLRPEDSFMSVYPMQTEHHQTPLDYNTQVTWMLAQR_5	Short	S_1	4	2	1	2.1	NA	QEP2_210813_AB_125
Q8N3U4-2	Q8N3U4	Cohesin subunit SA-2	STAG2_FL	RLRPEDSFMSVYPMQTEHHQTPLDYNTQVTWMLAQR_6	Short	S_1	4	2	1	2.1	NA	QEP2_210813_AB_125
Q8N3U4-2	Q8N3U4	Cohesin subunit SA-2	STAG2_FL	TNLQHAIR_2	Short	S_1	4	2	1	2.1	NA	QEP2_210813_AB_125
Q8N3U4-2	Q8N3U4	Cohesin subunit SA-2	STAG2_FL	TNLQHAIRR_2	Short	S_1	4	2	1	2.1	NA	QEP2_210813_AB_125
Q8N3U4-2	Q8N3U4	Cohesin subunit SA-2	STAG2_FL	LRPEDSFM(Oxidation (M))SVYPM(Oxidation (M))QTEHHQTPLDYNTQVTWMLAQR_5	Short	S_2	5	2	6	2.6	NA	QEP2_210813_AB_145
Q8N3U4-2	Q8N3U4	Cohesin subunit SA-2	STAG2_FL	LRPEDSFM(Oxidation (M))SVYPMQTEHHQTPLDYNTQVTWMLAQR_4	Short	S_2	5	2	6	2.6	NA	QEP2_210813_AB_145
Q8N3U4-2	Q8N3U4	Cohesin subunit SA-2	STAG2_FL	LRPEDSFMSVYPM(Oxidation (M))QTEHHQTPLDYNTQVTWMLAQR_4	Short	S_2	5	2	6	2.6	NA	QEP2_210813_AB_145
Q8N3U4-2	Q8N3U4	Cohesin subunit SA-2	STAG2_FL	LRPEDSFMSVYPM(Oxidation (M))QTEHHQTPLDYNTQVTWMLAQR_5	Short	S_2	5	2	6	2.6	NA	QEP2_210813_AB_145
Q8N3U4-2	Q8N3U4	Cohesin subunit SA-2	STAG2_FL	LRPEDSFMSVYPMQTEHHQTPLDYNTQVTWM(Oxidation (M))LAQR_4	Short	S_2	5	2	6	2.6	NA	QEP2_210813_AB_145
Q8N3U4-2	Q8N3U4	Cohesin subunit SA-2	STAG2_FL	LRPEDSFMSVYPMQTEHHQTPLDYNTQVTWM(Oxidation (M))LAQR_5	Short	S_2	5	2	6	2.6	NA	QEP2_210813_AB_145
Q8N3U4-2	Q8N3U4	Cohesin subunit SA-2	STAG2_FL	LRPEDSFMSVYPMQTEHHQTPLDYNTQVTWMLAQR_4	Short	S_2	5	2	6	2.6	NA	QEP2_210813_AB_145
Q8N3U4-2	Q8N3U4	Cohesin subunit SA-2	STAG2_FL	LRPEDSFMSVYPMQTEHHQTPLDYNTQVTWMLAQR_5	Short	S_2	5	2	6	2.6	NA	QEP2_210813_AB_145
Q8N3U4-2	Q8N3U4	Cohesin subunit SA-2	STAG2_FL	LRTNLQHAIR_2	Short	S_2	5	2	6	2.6	NA	QEP2_210813_AB_145
Q8N3U4-2	Q8N3U4	Cohesin subunit SA-2	STAG2_FL	LRTNLQHAIR_3	Short	S_2	5	2	6	2.6	NA	QEP2_210813_AB_145
Q8N3U4-2	Q8N3U4	Cohesin subunit SA-2	STAG2_FL	RLRPEDSFM(Oxidation (M))SVYPMQTEHHQTPLDYNTQVTWMLAQR_5	Short	S_2	5	2	6	2.6	NA	QEP2_210813_AB_145
Q8N3U4-2	Q8N3U4	Cohesin subunit SA-2	STAG2_FL	RLRPEDSFMSVYPM(Oxidation (M))QTEHHQTPLDYNTQVTWMLAQR_4	Short	S_2	5	2	6	2.6	NA	QEP2_210813_AB_145
Q8N3U4-2	Q8N3U4	Cohesin subunit SA-2	STAG2_FL	RLRPEDSFMSVYPM(Oxidation (M))QTEHHQTPLDYNTQVTWMLAQR_5	Short	S_2	5	2	6	2.6	NA	QEP2_210813_AB_145
Q8N3U4-2	Q8N3U4	Cohesin subunit SA-2	STAG2_FL	RLRPEDSFMSVYPM(Oxidation (M))QTEHHQTPLDYNTQVTWMLAQR_6	Short	S_2	5	2	6	2.6	NA	QEP2_210813_AB_145
Q8N3U4-2	Q8N3U4	Cohesin subunit SA-2	STAG2_FL	RLRPEDSFMSVYPMQTEHHQTPLDYNTQVTWMLAQR_4	Short	S_2	5	2	6	2.6	NA	QEP2_210813_AB_145
Q8N3U4-2	Q8N3U4	Cohesin subunit SA-2	STAG2_FL	RLRPEDSFMSVYPMQTEHHQTPLDYNTQVTWMLAQR_5	Short	S_2	5	2	6	2.6	NA	QEP2_210813_AB_145
Q8N3U4-2	Q8N3U4	Cohesin subunit SA-2	STAG2_FL	RLRPEDSFMSVYPMQTEHHQTPLDYNTQVTWMLAQR_6	Short	S_2	5	2	6	2.6	NA	QEP2_210813_AB_145
Q8N3U4-2	Q8N3U4	Cohesin subunit SA-2	STAG2_FL	TNLQHAIR_2	Short	S_2	5	2	6	2.6	NA	QEP2_210813_AB_145
Q8N3U4-2	Q8N3U4	Cohesin subunit SA-2	STAG2_FL	TNLQHAIRR_2	Short	S_2	5	2	6	2.6	NA	QEP2_210813_AB_145
Q8N3U4-2	Q8N3U4	Cohesin subunit SA-2	STAG2_FL	LRPEDSFM(Oxidation (M))SVYPM(Oxidation (M))QTEHHQTPLDYNTQVTWMLAQR_5	Short	S_3	6	2	9	2.9	NA	QEP2_210813_AB_157
Q8N3U4-2	Q8N3U4	Cohesin subunit SA-2	STAG2_FL	LRPEDSFM(Oxidation (M))SVYPMQTEHHQTPLDYNTQVTWMLAQR_4	Short	S_3	6	2	9	2.9	NA	QEP2_210813_AB_157
Q8N3U4-2	Q8N3U4	Cohesin subunit SA-2	STAG2_FL	LRPEDSFMSVYPM(Oxidation (M))QTEHHQTPLDYNTQVTWMLAQR_4	Short	S_3	6	2	9	2.9	NA	QEP2_210813_AB_157
Q8N3U4-2	Q8N3U4	Cohesin subunit SA-2	STAG2_FL	LRPEDSFMSVYPM(Oxidation (M))QTEHHQTPLDYNTQVTWMLAQR_5	Short	S_3	6	2	9	2.9	NA	QEP2_210813_AB_157
Q8N3U4-2	Q8N3U4	Cohesin subunit SA-2	STAG2_FL	LRPEDSFMSVYPMQTEHHQTPLDYNTQVTWM(Oxidation (M))LAQR_4	Short	S_3	6	2	9	2.9	NA	QEP2_210813_AB_157
Q8N3U4-2	Q8N3U4	Cohesin subunit SA-2	STAG2_FL	LRPEDSFMSVYPMQTEHHQTPLDYNTQVTWM(Oxidation (M))LAQR_5	Short	S_3	6	2	9	2.9	NA	QEP2_210813_AB_157
Q8N3U4-2	Q8N3U4	Cohesin subunit SA-2	STAG2_FL	LRPEDSFMSVYPMQTEHHQTPLDYNTQVTWMLAQR_4	Short	S_3	6	2	9	2.9	NA	QEP2_210813_AB_157
Q8N3U4-2	Q8N3U4	Cohesin subunit SA-2	STAG2_FL	LRPEDSFMSVYPMQTEHHQTPLDYNTQVTWMLAQR_5	Short	S_3	6	2	9	2.9	NA	QEP2_210813_AB_157
Q8N3U4-2	Q8N3U4	Cohesin subunit SA-2	STAG2_FL	LRTNLQHAIR_2	Short	S_3	6	2	9	2.9	NA	QEP2_210813_AB_157
Q8N3U4-2	Q8N3U4	Cohesin subunit SA-2	STAG2_FL	LRTNLQHAIR_3	Short	S_3	6	2	9	2.9	NA	QEP2_210813_AB_157
Q8N3U4-2	Q8N3U4	Cohesin subunit SA-2	STAG2_FL	RLRPEDSFM(Oxidation (M))SVYPMQTEHHQTPLDYNTQVTWMLAQR_5	Short	S_3	6	2	9	2.9	NA	QEP2_210813_AB_157
Q8N3U4-2	Q8N3U4	Cohesin subunit SA-2	STAG2_FL	RLRPEDSFMSVYPM(Oxidation (M))QTEHHQTPLDYNTQVTWMLAQR_4	Short	S_3	6	2	9	2.9	NA	QEP2_210813_AB_157
Q8N3U4-2	Q8N3U4	Cohesin subunit SA-2	STAG2_FL	RLRPEDSFMSVYPM(Oxidation (M))QTEHHQTPLDYNTQVTWMLAQR_5	Short	S_3	6	2	9	2.9	NA	QEP2_210813_AB_157
Q8N3U4-2	Q8N3U4	Cohesin subunit SA-2	STAG2_FL	RLRPEDSFMSVYPM(Oxidation (M))QTEHHQTPLDYNTQVTWMLAQR_6	Short	S_3	6	2	9	2.9	NA	QEP2_210813_AB_157
Q8N3U4-2	Q8N3U4	Cohesin subunit SA-2	STAG2_FL	RLRPEDSFMSVYPMQTEHHQTPLDYNTQVTWMLAQR_4	Short	S_3	6	2	9	2.9	NA	QEP2_210813_AB_157
Q8N3U4-2	Q8N3U4	Cohesin subunit SA-2	STAG2_FL	RLRPEDSFMSVYPMQTEHHQTPLDYNTQVTWMLAQR_5	Short	S_3	6	2	9	2.9	NA	QEP2_210813_AB_157
Q8N3U4-2	Q8N3U4	Cohesin subunit SA-2	STAG2_FL	RLRPEDSFMSVYPMQTEHHQTPLDYNTQVTWMLAQR_6	Short	S_3	6	2	9	2.9	NA	QEP2_210813_AB_157
Q8N3U4-2	Q8N3U4	Cohesin subunit SA-2	STAG2_FL	TNLQHAIR_2	Short	S_3	6	2	9	2.9	NA	QEP2_210813_AB_157
Q8N3U4-2	Q8N3U4	Cohesin subunit SA-2	STAG2_FL	TNLQHAIRR_2	Short	S_3	6	2	9	2.9	NA	QEP2_210813_AB_157
Q8N3U4-2	Q8N3U4	Cohesin subunit SA-2	STAG2_FL	LRPEDSFM(Oxidation (M))SVYPM(Oxidation (M))QTEHHQTPLDYNTQVTWMLAQR_5	Long	L_1	7	3	2	3.2	23.9491	QEP2_210813_AB_129
Q8N3U4-2	Q8N3U4	Cohesin subunit SA-2	STAG2_FL	LRPEDSFM(Oxidation (M))SVYPMQTEHHQTPLDYNTQVTWMLAQR_4	Long	L_1	7	3	2	3.2	26.816	QEP2_210813_AB_129
Q8N3U4-2	Q8N3U4	Cohesin subunit SA-2	STAG2_FL	LRPEDSFMSVYPM(Oxidation (M))QTEHHQTPLDYNTQVTWMLAQR_4	Long	L_1	7	3	2	3.2	26.7681	QEP2_210813_AB_129
Q8N3U4-2	Q8N3U4	Cohesin subunit SA-2	STAG2_FL	LRPEDSFMSVYPM(Oxidation (M))QTEHHQTPLDYNTQVTWMLAQR_5	Long	L_1	7	3	2	3.2	26.5125	QEP2_210813_AB_129
Q8N3U4-2	Q8N3U4	Cohesin subunit SA-2	STAG2_FL	LRPEDSFMSVYPMQTEHHQTPLDYNTQVTWM(Oxidation (M))LAQR_4	Long	L_1	7	3	2	3.2	26.0799	QEP2_210813_AB_129
Q8N3U4-2	Q8N3U4	Cohesin subunit SA-2	STAG2_FL	LRPEDSFMSVYPMQTEHHQTPLDYNTQVTWM(Oxidation (M))LAQR_5	Long	L_1	7	3	2	3.2	25.6835	QEP2_210813_AB_129
Q8N3U4-2	Q8N3U4	Cohesin subunit SA-2	STAG2_FL	LRPEDSFMSVYPMQTEHHQTPLDYNTQVTWMLAQR_4	Long	L_1	7	3	2	3.2	24.2537	QEP2_210813_AB_129
Q8N3U4-2	Q8N3U4	Cohesin subunit SA-2	STAG2_FL	LRPEDSFMSVYPMQTEHHQTPLDYNTQVTWMLAQR_5	Long	L_1	7	3	2	3.2	23.867	QEP2_210813_AB_129
Q8N3U4-2	Q8N3U4	Cohesin subunit SA-2	STAG2_FL	LRTNLQHAIR_2	Long	L_1	7	3	2	3.2	24.7206	QEP2_210813_AB_129
Q8N3U4-2	Q8N3U4	Cohesin subunit SA-2	STAG2_FL	LRTNLQHAIR_3	Long	L_1	7	3	2	3.2	26.4256	QEP2_210813_AB_129
Q8N3U4-2	Q8N3U4	Cohesin subunit SA-2	STAG2_FL	RLRPEDSFM(Oxidation (M))SVYPMQTEHHQTPLDYNTQVTWMLAQR_5	Long	L_1	7	3	2	3.2	25.4445	QEP2_210813_AB_129
Q8N3U4-2	Q8N3U4	Cohesin subunit SA-2	STAG2_FL	RLRPEDSFMSVYPM(Oxidation (M))QTEHHQTPLDYNTQVTWMLAQR_4	Long	L_1	7	3	2	3.2	24.9828	QEP2_210813_AB_129
Q8N3U4-2	Q8N3U4	Cohesin subunit SA-2	STAG2_FL	RLRPEDSFMSVYPM(Oxidation (M))QTEHHQTPLDYNTQVTWMLAQR_5	Long	L_1	7	3	2	3.2	25.8372	QEP2_210813_AB_129
Q8N3U4-2	Q8N3U4	Cohesin subunit SA-2	STAG2_FL	RLRPEDSFMSVYPM(Oxidation (M))QTEHHQTPLDYNTQVTWMLAQR_6	Long	L_1	7	3	2	3.2	22.4589	QEP2_210813_AB_129
Q8N3U4-2	Q8N3U4	Cohesin subunit SA-2	STAG2_FL	RLRPEDSFMSVYPMQTEHHQTPLDYNTQVTWMLAQR_4	Long	L_1	7	3	2	3.2	27.2972	QEP2_210813_AB_129
Q8N3U4-2	Q8N3U4	Cohesin subunit SA-2	STAG2_FL	RLRPEDSFMSVYPMQTEHHQTPLDYNTQVTWMLAQR_5	Long	L_1	7	3	2	3.2	28.1559	QEP2_210813_AB_129
Q8N3U4-2	Q8N3U4	Cohesin subunit SA-2	STAG2_FL	RLRPEDSFMSVYPMQTEHHQTPLDYNTQVTWMLAQR_6	Long	L_1	7	3	2	3.2	24.7896	QEP2_210813_AB_129
Q8N3U4-2	Q8N3U4	Cohesin subunit SA-2	STAG2_FL	TNLQHAIR_2	Long	L_1	7	3	2	3.2	30.1298	QEP2_210813_AB_129
Q8N3U4-2	Q8N3U4	Cohesin subunit SA-2	STAG2_FL	TNLQHAIRR_2	Long	L_1	7	3	2	3.2	24.4635	QEP2_210813_AB_129
Q8N3U4-2	Q8N3U4	Cohesin subunit SA-2	STAG2_FL	LRPEDSFM(Oxidation (M))SVYPM(Oxidation (M))QTEHHQTPLDYNTQVTWMLAQR_5	Long	L_2	8	3	5	3.5	24.4266	QEP2_210813_AB_141
Q8N3U4-2	Q8N3U4	Cohesin subunit SA-2	STAG2_FL	LRPEDSFM(Oxidation (M))SVYPMQTEHHQTPLDYNTQVTWMLAQR_4	Long	L_2	8	3	5	3.5	25.2595	QEP2_210813_AB_141
Q8N3U4-2	Q8N3U4	Cohesin subunit SA-2	STAG2_FL	LRPEDSFMSVYPM(Oxidation (M))QTEHHQTPLDYNTQVTWMLAQR_4	Long	L_2	8	3	5	3.5	26.7406	QEP2_210813_AB_141
Q8N3U4-2	Q8N3U4	Cohesin subunit SA-2	STAG2_FL	LRPEDSFMSVYPM(Oxidation (M))QTEHHQTPLDYNTQVTWMLAQR_5	Long	L_2	8	3	5	3.5	26.7367	QEP2_210813_AB_141
Q8N3U4-2	Q8N3U4	Cohesin subunit SA-2	STAG2_FL	LRPEDSFMSVYPMQTEHHQTPLDYNTQVTWM(Oxidation (M))LAQR_4	Long	L_2	8	3	5	3.5	25.4408	QEP2_210813_AB_141
Q8N3U4-2	Q8N3U4	Cohesin subunit SA-2	STAG2_FL	LRPEDSFMSVYPMQTEHHQTPLDYNTQVTWM(Oxidation (M))LAQR_5	Long	L_2	8	3	5	3.5	25.4562	QEP2_210813_AB_141
Q8N3U4-2	Q8N3U4	Cohesin subunit SA-2	STAG2_FL	LRPEDSFMSVYPMQTEHHQTPLDYNTQVTWMLAQR_4	Long	L_2	8	3	5	3.5	28.4806	QEP2_210813_AB_141
Q8N3U4-2	Q8N3U4	Cohesin subunit SA-2	STAG2_FL	LRPEDSFMSVYPMQTEHHQTPLDYNTQVTWMLAQR_5	Long	L_2	8	3	5	3.5	28.039	QEP2_210813_AB_141
Q8N3U4-2	Q8N3U4	Cohesin subunit SA-2	STAG2_FL	LRTNLQHAIR_2	Long	L_2	8	3	5	3.5	21.7815	QEP2_210813_AB_141
Q8N3U4-2	Q8N3U4	Cohesin subunit SA-2	STAG2_FL	LRTNLQHAIR_3	Long	L_2	8	3	5	3.5	25.5318	QEP2_210813_AB_141
Q8N3U4-2	Q8N3U4	Cohesin subunit SA-2	STAG2_FL	RLRPEDSFM(Oxidation (M))SVYPMQTEHHQTPLDYNTQVTWMLAQR_5	Long	L_2	8	3	5	3.5	24.3054	QEP2_210813_AB_141
Q8N3U4-2	Q8N3U4	Cohesin subunit SA-2	STAG2_FL	RLRPEDSFMSVYPM(Oxidation (M))QTEHHQTPLDYNTQVTWMLAQR_4	Long	L_2	8	3	5	3.5	23.875	QEP2_210813_AB_141
Q8N3U4-2	Q8N3U4	Cohesin subunit SA-2	STAG2_FL	RLRPEDSFMSVYPM(Oxidation (M))QTEHHQTPLDYNTQVTWMLAQR_5	Long	L_2	8	3	5	3.5	24.3427	QEP2_210813_AB_141
Q8N3U4-2	Q8N3U4	Cohesin subunit SA-2	STAG2_FL	RLRPEDSFMSVYPM(Oxidation (M))QTEHHQTPLDYNTQVTWMLAQR_6	Long	L_2	8	3	5	3.5	22.5079	QEP2_210813_AB_141
Q8N3U4-2	Q8N3U4	Cohesin subunit SA-2	STAG2_FL	RLRPEDSFMSVYPMQTEHHQTPLDYNTQVTWMLAQR_4	Long	L_2	8	3	5	3.5	25.2109	QEP2_210813_AB_141
Q8N3U4-2	Q8N3U4	Cohesin subunit SA-2	STAG2_FL	RLRPEDSFMSVYPMQTEHHQTPLDYNTQVTWMLAQR_5	Long	L_2	8	3	5	3.5	26.1205	QEP2_210813_AB_141
Q8N3U4-2	Q8N3U4	Cohesin subunit SA-2	STAG2_FL	RLRPEDSFMSVYPMQTEHHQTPLDYNTQVTWMLAQR_6	Long	L_2	8	3	5	3.5	23.7177	QEP2_210813_AB_141
Q8N3U4-2	Q8N3U4	Cohesin subunit SA-2	STAG2_FL	TNLQHAIR_2	Long	L_2	8	3	5	3.5	30.6065	QEP2_210813_AB_141
Q8N3U4-2	Q8N3U4	Cohesin subunit SA-2	STAG2_FL	TNLQHAIRR_2	Long	L_2	8	3	5	3.5	25.5718	QEP2_210813_AB_141
Q8N3U4-2	Q8N3U4	Cohesin subunit SA-2	STAG2_FL	LRPEDSFM(Oxidation (M))SVYPM(Oxidation (M))QTEHHQTPLDYNTQVTWMLAQR_5	Long	L_3	9	3	7	3.7	24.6633	QEP2_210813_AB_149
Q8N3U4-2	Q8N3U4	Cohesin subunit SA-2	STAG2_FL	LRPEDSFM(Oxidation (M))SVYPMQTEHHQTPLDYNTQVTWMLAQR_4	Long	L_3	9	3	7	3.7	25.339	QEP2_210813_AB_149
Q8N3U4-2	Q8N3U4	Cohesin subunit SA-2	STAG2_FL	LRPEDSFMSVYPM(Oxidation (M))QTEHHQTPLDYNTQVTWMLAQR_4	Long	L_3	9	3	7	3.7	26.1496	QEP2_210813_AB_149
Q8N3U4-2	Q8N3U4	Cohesin subunit SA-2	STAG2_FL	LRPEDSFMSVYPM(Oxidation (M))QTEHHQTPLDYNTQVTWMLAQR_5	Long	L_3	9	3	7	3.7	26.0154	QEP2_210813_AB_149
Q8N3U4-2	Q8N3U4	Cohesin subunit SA-2	STAG2_FL	LRPEDSFMSVYPMQTEHHQTPLDYNTQVTWM(Oxidation (M))LAQR_4	Long	L_3	9	3	7	3.7	24.738	QEP2_210813_AB_149
Q8N3U4-2	Q8N3U4	Cohesin subunit SA-2	STAG2_FL	LRPEDSFMSVYPMQTEHHQTPLDYNTQVTWM(Oxidation (M))LAQR_5	Long	L_3	9	3	7	3.7	24.7158	QEP2_210813_AB_149
Q8N3U4-2	Q8N3U4	Cohesin subunit SA-2	STAG2_FL	LRPEDSFMSVYPMQTEHHQTPLDYNTQVTWMLAQR_4	Long	L_3	9	3	7	3.7	28.1485	QEP2_210813_AB_149
Q8N3U4-2	Q8N3U4	Cohesin subunit SA-2	STAG2_FL	LRPEDSFMSVYPMQTEHHQTPLDYNTQVTWMLAQR_5	Long	L_3	9	3	7	3.7	27.7762	QEP2_210813_AB_149
Q8N3U4-2	Q8N3U4	Cohesin subunit SA-2	STAG2_FL	LRTNLQHAIR_2	Long	L_3	9	3	7	3.7	23.9654	QEP2_210813_AB_149
Q8N3U4-2	Q8N3U4	Cohesin subunit SA-2	STAG2_FL	LRTNLQHAIR_3	Long	L_3	9	3	7	3.7	27.3537	QEP2_210813_AB_149
Q8N3U4-2	Q8N3U4	Cohesin subunit SA-2	STAG2_FL	RLRPEDSFM(Oxidation (M))SVYPMQTEHHQTPLDYNTQVTWMLAQR_5	Long	L_3	9	3	7	3.7	24.11	QEP2_210813_AB_149
Q8N3U4-2	Q8N3U4	Cohesin subunit SA-2	STAG2_FL	RLRPEDSFMSVYPM(Oxidation (M))QTEHHQTPLDYNTQVTWMLAQR_4	Long	L_3	9	3	7	3.7	21.9306	QEP2_210813_AB_149
Q8N3U4-2	Q8N3U4	Cohesin subunit SA-2	STAG2_FL	RLRPEDSFMSVYPM(Oxidation (M))QTEHHQTPLDYNTQVTWMLAQR_5	Long	L_3	9	3	7	3.7	23.8598	QEP2_210813_AB_149
Q8N3U4-2	Q8N3U4	Cohesin subunit SA-2	STAG2_FL	RLRPEDSFMSVYPM(Oxidation (M))QTEHHQTPLDYNTQVTWMLAQR_6	Long	L_3	9	3	7	3.7	22.183	QEP2_210813_AB_149
Q8N3U4-2	Q8N3U4	Cohesin subunit SA-2	STAG2_FL	RLRPEDSFMSVYPMQTEHHQTPLDYNTQVTWMLAQR_4	Long	L_3	9	3	7	3.7	22.9355	QEP2_210813_AB_149
Q8N3U4-2	Q8N3U4	Cohesin subunit SA-2	STAG2_FL	RLRPEDSFMSVYPMQTEHHQTPLDYNTQVTWMLAQR_5	Long	L_3	9	3	7	3.7	24.1103	QEP2_210813_AB_149
Q8N3U4-2	Q8N3U4	Cohesin subunit SA-2	STAG2_FL	RLRPEDSFMSVYPMQTEHHQTPLDYNTQVTWMLAQR_6	Long	L_3	9	3	7	3.7	21.3945	QEP2_210813_AB_149
Q8N3U4-2	Q8N3U4	Cohesin subunit SA-2	STAG2_FL	TNLQHAIR_2	Long	L_3	9	3	7	3.7	28.8135	QEP2_210813_AB_149
Q8N3U4-2	Q8N3U4	Cohesin subunit SA-2	STAG2_FL	TNLQHAIRR_2	Long	L_3	9	3	7	3.7	27.7489	QEP2_210813_AB_149
Q9UQE7	Q9UQE7	Structural maintenance of chromosomes protein 3	SMC3	AKDLQDELAGNSEQR_2	Control	C_1	1	1	3	1.3	NA	QEP2_210813_AB_133
Q9UQE7	Q9UQE7	Structural maintenance of chromosomes protein 3	SMC3	AKDLQDELAGNSEQR_3	Control	C_1	1	1	3	1.3	NA	QEP2_210813_AB_133
Q9UQE7	Q9UQE7	Structural maintenance of chromosomes protein 3	SMC3	ALDQFVNFSEQKEK_3	Control	C_1	1	1	3	1.3	NA	QEP2_210813_AB_133
Q9UQE7	Q9UQE7	Structural maintenance of chromosomes protein 3	SMC3	ALEYTIYNQELNETR_2	Control	C_1	1	1	3	1.3	NA	QEP2_210813_AB_133
Q9UQE7	Q9UQE7	Structural maintenance of chromosomes protein 3	SMC3	DKMEDIER_2	Control	C_1	1	1	3	1.3	NA	QEP2_210813_AB_133
Q9UQE7	Q9UQE7	Structural maintenance of chromosomes protein 3	SMC3	DSILSEMK_2	Control	C_1	1	1	3	1.3	NA	QEP2_210813_AB_133
Q9UQE7	Q9UQE7	Structural maintenance of chromosomes protein 3	SMC3	DTAYPETNDAIPMISK_2	Control	C_1	1	1	3	1.3	NA	QEP2_210813_AB_133
Q9UQE7	Q9UQE7	Structural maintenance of chromosomes protein 3	SMC3	EENAEQQALAAK_2	Control	C_1	1	1	3	1.3	NA	QEP2_210813_AB_133
Q9UQE7	Q9UQE7	Structural maintenance of chromosomes protein 3	SMC3	EMQQLSGGQK_2	Control	C_1	1	1	3	1.3	NA	QEP2_210813_AB_133
Q9UQE7	Q9UQE7	Structural maintenance of chromosomes protein 3	SMC3	GALTGGYYDTR_2	Control	C_1	1	1	3	1.3	NA	QEP2_210813_AB_133
Q9UQE7	Q9UQE7	Structural maintenance of chromosomes protein 3	SMC3	GSGSQSSVPSVDQFTGVGIR_2	Control	C_1	1	1	3	1.3	NA	QEP2_210813_AB_133
Q9UQE7	Q9UQE7	Structural maintenance of chromosomes protein 3	SMC3	ILMEFNK_2	Control	C_1	1	1	3	1.3	NA	QEP2_210813_AB_133
Q9UQE7	Q9UQE7	Structural maintenance of chromosomes protein 3	SMC3	INNEIDQLMNQMQQIETQQR_3	Control	C_1	1	1	3	1.3	NA	QEP2_210813_AB_133
Q9UQE7	Q9UQE7	Structural maintenance of chromosomes protein 3	SMC3	INQMATAPDSQR_2	Control	C_1	1	1	3	1.3	NA	QEP2_210813_AB_133
Q9UQE7	Q9UQE7	Structural maintenance of chromosomes protein 3	SMC3	IRELGSLPQEAFEK_3	Control	C_1	1	1	3	1.3	NA	QEP2_210813_AB_133
Q9UQE7	Q9UQE7	Structural maintenance of chromosomes protein 3	SMC3	IRELGSLPQEAFEKYQTLSLK_3	Control	C_1	1	1	3	1.3	NA	QEP2_210813_AB_133
Q9UQE7	Q9UQE7	Structural maintenance of chromosomes protein 3	SMC3	ISAMKEEKEQLSAER_3	Control	C_1	1	1	3	1.3	NA	QEP2_210813_AB_133
Q9UQE7	Q9UQE7	Structural maintenance of chromosomes protein 3	SMC3	KAEEELGELEAK_3	Control	C_1	1	1	3	1.3	NA	QEP2_210813_AB_133
Q9UQE7	Q9UQE7	Structural maintenance of chromosomes protein 3	SMC3	KEESISLMK_2	Control	C_1	1	1	3	1.3	NA	QEP2_210813_AB_133
Q9UQE7	Q9UQE7	Structural maintenance of chromosomes protein 3	SMC3	KGDVEGSQSQDEGEGSGESER_3	Control	C_1	1	1	3	1.3	NA	QEP2_210813_AB_133
Q9UQE7	Q9UQE7	Structural maintenance of chromosomes protein 3	SMC3	KGDVEGSQSQDEGEGSGESERGSGSQSSVPSVDQFTGVGIR_4	Control	C_1	1	1	3	1.3	NA	QEP2_210813_AB_133
Q9UQE7	Q9UQE7	Structural maintenance of chromosomes protein 3	SMC3	KYEAIQLTFK_3	Control	C_1	1	1	3	1.3	NA	QEP2_210813_AB_133
Q9UQE7	Q9UQE7	Structural maintenance of chromosomes protein 3	SMC3	LALLHEGTGPR_2	Control	C_1	1	1	3	1.3	NA	QEP2_210813_AB_133
Q9UQE7	Q9UQE7	Structural maintenance of chromosomes protein 3	SMC3	LDVRDTAYPETNDAIPMISK_3	Control	C_1	1	1	3	1.3	NA	QEP2_210813_AB_133
Q9UQE7	Q9UQE7	Structural maintenance of chromosomes protein 3	SMC3	LFYHIVDSDEVSTK_3	Control	C_1	1	1	3	1.3	NA	QEP2_210813_AB_133
Q9UQE7	Q9UQE7	Structural maintenance of chromosomes protein 3	SMC3	MNLPGEVTFLPLNK_2	Control	C_1	1	1	3	1.3	NA	QEP2_210813_AB_133
Q9UQE7	Q9UQE7	Structural maintenance of chromosomes protein 3	SMC3	MNLPGEVTFLPLNKLDVR_3	Control	C_1	1	1	3	1.3	NA	QEP2_210813_AB_133
Q9UQE7	Q9UQE7	Structural maintenance of chromosomes protein 3	SMC3	NDVMNLLESAGFSR_2	Control	C_1	1	1	3	1.3	NA	QEP2_210813_AB_133
Q9UQE7	Q9UQE7	Structural maintenance of chromosomes protein 3	SMC3	NFSEVFQK_2	Control	C_1	1	1	3	1.3	NA	QEP2_210813_AB_133
Q9UQE7	Q9UQE7	Structural maintenance of chromosomes protein 3	SMC3	NLEQYNKLDQDLNEVK_3	Control	C_1	1	1	3	1.3	NA	QEP2_210813_AB_133
Q9UQE7	Q9UQE7	Structural maintenance of chromosomes protein 3	SMC3	NYLWREENAEQQALAAK_3	Control	C_1	1	1	3	1.3	NA	QEP2_210813_AB_133
Q9UQE7	Q9UQE7	Structural maintenance of chromosomes protein 3	SMC3	RALEYTIYNQELNETR_3	Control	C_1	1	1	3	1.3	NA	QEP2_210813_AB_133
Q9UQE7	Q9UQE7	Structural maintenance of chromosomes protein 3	SMC3	RQEELDR_2	Control	C_1	1	1	3	1.3	NA	QEP2_210813_AB_133
Q9UQE7	Q9UQE7	Structural maintenance of chromosomes protein 3	SMC3	RVDALNDEIR_2	Control	C_1	1	1	3	1.3	NA	QEP2_210813_AB_133
Q9UQE7	Q9UQE7	Structural maintenance of chromosomes protein 3	SMC3	SEDLDNSIDKTEAGIKELQK_3	Control	C_1	1	1	3	1.3	NA	QEP2_210813_AB_133
Q9UQE7	Q9UQE7	Structural maintenance of chromosomes protein 3	SMC3	SEDLDNSIDKTEAGIKELQK_4	Control	C_1	1	1	3	1.3	NA	QEP2_210813_AB_133
Q9UQE7	Q9UQE7	Structural maintenance of chromosomes protein 3	SMC3	SIMELMNVLELR_2	Control	C_1	1	1	3	1.3	NA	QEP2_210813_AB_133
Q9UQE7	Q9UQE7	Structural maintenance of chromosomes protein 3	SMC3	SIMELMNVLELRK_3	Control	C_1	1	1	3	1.3	NA	QEP2_210813_AB_133
Q9UQE7	Q9UQE7	Structural maintenance of chromosomes protein 3	SMC3	SLDQAINDK_2	Control	C_1	1	1	3	1.3	NA	QEP2_210813_AB_133
Q9UQE7	Q9UQE7	Structural maintenance of chromosomes protein 3	SMC3	SLDQAINDKKR_3	Control	C_1	1	1	3	1.3	NA	QEP2_210813_AB_133
Q9UQE7	Q9UQE7	Structural maintenance of chromosomes protein 3	SMC3	SMEVSTQLAR_2	Control	C_1	1	1	3	1.3	NA	QEP2_210813_AB_133
Q9UQE7	Q9UQE7	Structural maintenance of chromosomes protein 3	SMC3	SYRDQTIVDPFSSK_2	Control	C_1	1	1	3	1.3	NA	QEP2_210813_AB_133
Q9UQE7	Q9UQE7	Structural maintenance of chromosomes protein 3	SMC3	SYRDQTIVDPFSSK_3	Control	C_1	1	1	3	1.3	NA	QEP2_210813_AB_133
Q9UQE7	Q9UQE7	Structural maintenance of chromosomes protein 3	SMC3	VDALNDEIR_2	Control	C_1	1	1	3	1.3	NA	QEP2_210813_AB_133
Q9UQE7	Q9UQE7	Structural maintenance of chromosomes protein 3	SMC3	VDALNDEIRQLQQENR_3	Control	C_1	1	1	3	1.3	NA	QEP2_210813_AB_133
Q9UQE7	Q9UQE7	Structural maintenance of chromosomes protein 3	SMC3	VETYLNENLR_2	Control	C_1	1	1	3	1.3	NA	QEP2_210813_AB_133
Q9UQE7	Q9UQE7	Structural maintenance of chromosomes protein 3	SMC3	VKDTMAR_2	Control	C_1	1	1	3	1.3	NA	QEP2_210813_AB_133
Q9UQE7	Q9UQE7	Structural maintenance of chromosomes protein 3	SMC3	AKDLQDELAGNSEQR_2	Control	C_2	2	1	4	1.4	NA	QEP2_210813_AB_137
Q9UQE7	Q9UQE7	Structural maintenance of chromosomes protein 3	SMC3	AKDLQDELAGNSEQR_3	Control	C_2	2	1	4	1.4	NA	QEP2_210813_AB_137
Q9UQE7	Q9UQE7	Structural maintenance of chromosomes protein 3	SMC3	ALDQFVNFSEQKEK_3	Control	C_2	2	1	4	1.4	NA	QEP2_210813_AB_137
Q9UQE7	Q9UQE7	Structural maintenance of chromosomes protein 3	SMC3	ALEYTIYNQELNETR_2	Control	C_2	2	1	4	1.4	NA	QEP2_210813_AB_137
Q9UQE7	Q9UQE7	Structural maintenance of chromosomes protein 3	SMC3	DKMEDIER_2	Control	C_2	2	1	4	1.4	NA	QEP2_210813_AB_137
Q9UQE7	Q9UQE7	Structural maintenance of chromosomes protein 3	SMC3	DSILSEMK_2	Control	C_2	2	1	4	1.4	NA	QEP2_210813_AB_137
Q9UQE7	Q9UQE7	Structural maintenance of chromosomes protein 3	SMC3	DTAYPETNDAIPMISK_2	Control	C_2	2	1	4	1.4	NA	QEP2_210813_AB_137
Q9UQE7	Q9UQE7	Structural maintenance of chromosomes protein 3	SMC3	EENAEQQALAAK_2	Control	C_2	2	1	4	1.4	NA	QEP2_210813_AB_137
Q9UQE7	Q9UQE7	Structural maintenance of chromosomes protein 3	SMC3	EMQQLSGGQK_2	Control	C_2	2	1	4	1.4	NA	QEP2_210813_AB_137
Q9UQE7	Q9UQE7	Structural maintenance of chromosomes protein 3	SMC3	GALTGGYYDTR_2	Control	C_2	2	1	4	1.4	NA	QEP2_210813_AB_137
Q9UQE7	Q9UQE7	Structural maintenance of chromosomes protein 3	SMC3	GSGSQSSVPSVDQFTGVGIR_2	Control	C_2	2	1	4	1.4	NA	QEP2_210813_AB_137
Q9UQE7	Q9UQE7	Structural maintenance of chromosomes protein 3	SMC3	ILMEFNK_2	Control	C_2	2	1	4	1.4	NA	QEP2_210813_AB_137
Q9UQE7	Q9UQE7	Structural maintenance of chromosomes protein 3	SMC3	INNEIDQLMNQMQQIETQQR_3	Control	C_2	2	1	4	1.4	NA	QEP2_210813_AB_137
Q9UQE7	Q9UQE7	Structural maintenance of chromosomes protein 3	SMC3	INQMATAPDSQR_2	Control	C_2	2	1	4	1.4	NA	QEP2_210813_AB_137
Q9UQE7	Q9UQE7	Structural maintenance of chromosomes protein 3	SMC3	IRELGSLPQEAFEK_3	Control	C_2	2	1	4	1.4	NA	QEP2_210813_AB_137
Q9UQE7	Q9UQE7	Structural maintenance of chromosomes protein 3	SMC3	IRELGSLPQEAFEKYQTLSLK_3	Control	C_2	2	1	4	1.4	NA	QEP2_210813_AB_137
Q9UQE7	Q9UQE7	Structural maintenance of chromosomes protein 3	SMC3	ISAMKEEKEQLSAER_3	Control	C_2	2	1	4	1.4	NA	QEP2_210813_AB_137
Q9UQE7	Q9UQE7	Structural maintenance of chromosomes protein 3	SMC3	KAEEELGELEAK_3	Control	C_2	2	1	4	1.4	NA	QEP2_210813_AB_137
Q9UQE7	Q9UQE7	Structural maintenance of chromosomes protein 3	SMC3	KEESISLMK_2	Control	C_2	2	1	4	1.4	NA	QEP2_210813_AB_137
Q9UQE7	Q9UQE7	Structural maintenance of chromosomes protein 3	SMC3	KGDVEGSQSQDEGEGSGESER_3	Control	C_2	2	1	4	1.4	NA	QEP2_210813_AB_137
Q9UQE7	Q9UQE7	Structural maintenance of chromosomes protein 3	SMC3	KGDVEGSQSQDEGEGSGESERGSGSQSSVPSVDQFTGVGIR_4	Control	C_2	2	1	4	1.4	NA	QEP2_210813_AB_137
Q9UQE7	Q9UQE7	Structural maintenance of chromosomes protein 3	SMC3	KYEAIQLTFK_3	Control	C_2	2	1	4	1.4	NA	QEP2_210813_AB_137
Q9UQE7	Q9UQE7	Structural maintenance of chromosomes protein 3	SMC3	LALLHEGTGPR_2	Control	C_2	2	1	4	1.4	NA	QEP2_210813_AB_137
Q9UQE7	Q9UQE7	Structural maintenance of chromosomes protein 3	SMC3	LDVRDTAYPETNDAIPMISK_3	Control	C_2	2	1	4	1.4	NA	QEP2_210813_AB_137
Q9UQE7	Q9UQE7	Structural maintenance of chromosomes protein 3	SMC3	LFYHIVDSDEVSTK_3	Control	C_2	2	1	4	1.4	NA	QEP2_210813_AB_137
Q9UQE7	Q9UQE7	Structural maintenance of chromosomes protein 3	SMC3	MNLPGEVTFLPLNK_2	Control	C_2	2	1	4	1.4	NA	QEP2_210813_AB_137
Q9UQE7	Q9UQE7	Structural maintenance of chromosomes protein 3	SMC3	MNLPGEVTFLPLNKLDVR_3	Control	C_2	2	1	4	1.4	NA	QEP2_210813_AB_137
Q9UQE7	Q9UQE7	Structural maintenance of chromosomes protein 3	SMC3	NDVMNLLESAGFSR_2	Control	C_2	2	1	4	1.4	NA	QEP2_210813_AB_137
Q9UQE7	Q9UQE7	Structural maintenance of chromosomes protein 3	SMC3	NFSEVFQK_2	Control	C_2	2	1	4	1.4	NA	QEP2_210813_AB_137
Q9UQE7	Q9UQE7	Structural maintenance of chromosomes protein 3	SMC3	NLEQYNKLDQDLNEVK_3	Control	C_2	2	1	4	1.4	NA	QEP2_210813_AB_137
Q9UQE7	Q9UQE7	Structural maintenance of chromosomes protein 3	SMC3	NYLWREENAEQQALAAK_3	Control	C_2	2	1	4	1.4	NA	QEP2_210813_AB_137
Q9UQE7	Q9UQE7	Structural maintenance of chromosomes protein 3	SMC3	RALEYTIYNQELNETR_3	Control	C_2	2	1	4	1.4	NA	QEP2_210813_AB_137
Q9UQE7	Q9UQE7	Structural maintenance of chromosomes protein 3	SMC3	RQEELDR_2	Control	C_2	2	1	4	1.4	NA	QEP2_210813_AB_137
Q9UQE7	Q9UQE7	Structural maintenance of chromosomes protein 3	SMC3	RVDALNDEIR_2	Control	C_2	2	1	4	1.4	NA	QEP2_210813_AB_137
Q9UQE7	Q9UQE7	Structural maintenance of chromosomes protein 3	SMC3	SEDLDNSIDKTEAGIKELQK_3	Control	C_2	2	1	4	1.4	NA	QEP2_210813_AB_137
Q9UQE7	Q9UQE7	Structural maintenance of chromosomes protein 3	SMC3	SEDLDNSIDKTEAGIKELQK_4	Control	C_2	2	1	4	1.4	NA	QEP2_210813_AB_137
Q9UQE7	Q9UQE7	Structural maintenance of chromosomes protein 3	SMC3	SIMELMNVLELR_2	Control	C_2	2	1	4	1.4	NA	QEP2_210813_AB_137
Q9UQE7	Q9UQE7	Structural maintenance of chromosomes protein 3	SMC3	SIMELMNVLELRK_3	Control	C_2	2	1	4	1.4	NA	QEP2_210813_AB_137
Q9UQE7	Q9UQE7	Structural maintenance of chromosomes protein 3	SMC3	SLDQAINDK_2	Control	C_2	2	1	4	1.4	NA	QEP2_210813_AB_137
Q9UQE7	Q9UQE7	Structural maintenance of chromosomes protein 3	SMC3	SLDQAINDKKR_3	Control	C_2	2	1	4	1.4	NA	QEP2_210813_AB_137
Q9UQE7	Q9UQE7	Structural maintenance of chromosomes protein 3	SMC3	SMEVSTQLAR_2	Control	C_2	2	1	4	1.4	NA	QEP2_210813_AB_137
Q9UQE7	Q9UQE7	Structural maintenance of chromosomes protein 3	SMC3	SYRDQTIVDPFSSK_2	Control	C_2	2	1	4	1.4	NA	QEP2_210813_AB_137
Q9UQE7	Q9UQE7	Structural maintenance of chromosomes protein 3	SMC3	SYRDQTIVDPFSSK_3	Control	C_2	2	1	4	1.4	NA	QEP2_210813_AB_137
Q9UQE7	Q9UQE7	Structural maintenance of chromosomes protein 3	SMC3	VDALNDEIR_2	Control	C_2	2	1	4	1.4	NA	QEP2_210813_AB_137
Q9UQE7	Q9UQE7	Structural maintenance of chromosomes protein 3	SMC3	VDALNDEIRQLQQENR_3	Control	C_2	2	1	4	1.4	NA	QEP2_210813_AB_137
Q9UQE7	Q9UQE7	Structural maintenance of chromosomes protein 3	SMC3	VETYLNENLR_2	Control	C_2	2	1	4	1.4	NA	QEP2_210813_AB_137
Q9UQE7	Q9UQE7	Structural maintenance of chromosomes protein 3	SMC3	VKDTMAR_2	Control	C_2	2	1	4	1.4	NA	QEP2_210813_AB_137
Q9UQE7	Q9UQE7	Structural maintenance of chromosomes protein 3	SMC3	AKDLQDELAGNSEQR_2	Control	C_3	3	1	8	1.8	NA	QEP2_210813_AB_153
Q9UQE7	Q9UQE7	Structural maintenance of chromosomes protein 3	SMC3	AKDLQDELAGNSEQR_3	Control	C_3	3	1	8	1.8	NA	QEP2_210813_AB_153
Q9UQE7	Q9UQE7	Structural maintenance of chromosomes protein 3	SMC3	ALDQFVNFSEQKEK_3	Control	C_3	3	1	8	1.8	NA	QEP2_210813_AB_153
Q9UQE7	Q9UQE7	Structural maintenance of chromosomes protein 3	SMC3	ALEYTIYNQELNETR_2	Control	C_3	3	1	8	1.8	NA	QEP2_210813_AB_153
Q9UQE7	Q9UQE7	Structural maintenance of chromosomes protein 3	SMC3	DKMEDIER_2	Control	C_3	3	1	8	1.8	NA	QEP2_210813_AB_153
Q9UQE7	Q9UQE7	Structural maintenance of chromosomes protein 3	SMC3	DSILSEMK_2	Control	C_3	3	1	8	1.8	NA	QEP2_210813_AB_153
Q9UQE7	Q9UQE7	Structural maintenance of chromosomes protein 3	SMC3	DTAYPETNDAIPMISK_2	Control	C_3	3	1	8	1.8	NA	QEP2_210813_AB_153
Q9UQE7	Q9UQE7	Structural maintenance of chromosomes protein 3	SMC3	EENAEQQALAAK_2	Control	C_3	3	1	8	1.8	NA	QEP2_210813_AB_153
Q9UQE7	Q9UQE7	Structural maintenance of chromosomes protein 3	SMC3	EMQQLSGGQK_2	Control	C_3	3	1	8	1.8	NA	QEP2_210813_AB_153
Q9UQE7	Q9UQE7	Structural maintenance of chromosomes protein 3	SMC3	GALTGGYYDTR_2	Control	C_3	3	1	8	1.8	NA	QEP2_210813_AB_153
Q9UQE7	Q9UQE7	Structural maintenance of chromosomes protein 3	SMC3	GSGSQSSVPSVDQFTGVGIR_2	Control	C_3	3	1	8	1.8	NA	QEP2_210813_AB_153
Q9UQE7	Q9UQE7	Structural maintenance of chromosomes protein 3	SMC3	ILMEFNK_2	Control	C_3	3	1	8	1.8	NA	QEP2_210813_AB_153
Q9UQE7	Q9UQE7	Structural maintenance of chromosomes protein 3	SMC3	INNEIDQLMNQMQQIETQQR_3	Control	C_3	3	1	8	1.8	NA	QEP2_210813_AB_153
Q9UQE7	Q9UQE7	Structural maintenance of chromosomes protein 3	SMC3	INQMATAPDSQR_2	Control	C_3	3	1	8	1.8	NA	QEP2_210813_AB_153
Q9UQE7	Q9UQE7	Structural maintenance of chromosomes protein 3	SMC3	IRELGSLPQEAFEK_3	Control	C_3	3	1	8	1.8	NA	QEP2_210813_AB_153
Q9UQE7	Q9UQE7	Structural maintenance of chromosomes protein 3	SMC3	IRELGSLPQEAFEKYQTLSLK_3	Control	C_3	3	1	8	1.8	NA	QEP2_210813_AB_153
Q9UQE7	Q9UQE7	Structural maintenance of chromosomes protein 3	SMC3	ISAMKEEKEQLSAER_3	Control	C_3	3	1	8	1.8	NA	QEP2_210813_AB_153
Q9UQE7	Q9UQE7	Structural maintenance of chromosomes protein 3	SMC3	KAEEELGELEAK_3	Control	C_3	3	1	8	1.8	NA	QEP2_210813_AB_153
Q9UQE7	Q9UQE7	Structural maintenance of chromosomes protein 3	SMC3	KEESISLMK_2	Control	C_3	3	1	8	1.8	NA	QEP2_210813_AB_153
Q9UQE7	Q9UQE7	Structural maintenance of chromosomes protein 3	SMC3	KGDVEGSQSQDEGEGSGESER_3	Control	C_3	3	1	8	1.8	NA	QEP2_210813_AB_153
Q9UQE7	Q9UQE7	Structural maintenance of chromosomes protein 3	SMC3	KGDVEGSQSQDEGEGSGESERGSGSQSSVPSVDQFTGVGIR_4	Control	C_3	3	1	8	1.8	NA	QEP2_210813_AB_153
Q9UQE7	Q9UQE7	Structural maintenance of chromosomes protein 3	SMC3	KYEAIQLTFK_3	Control	C_3	3	1	8	1.8	NA	QEP2_210813_AB_153
Q9UQE7	Q9UQE7	Structural maintenance of chromosomes protein 3	SMC3	LALLHEGTGPR_2	Control	C_3	3	1	8	1.8	NA	QEP2_210813_AB_153
Q9UQE7	Q9UQE7	Structural maintenance of chromosomes protein 3	SMC3	LDVRDTAYPETNDAIPMISK_3	Control	C_3	3	1	8	1.8	NA	QEP2_210813_AB_153
Q9UQE7	Q9UQE7	Structural maintenance of chromosomes protein 3	SMC3	LFYHIVDSDEVSTK_3	Control	C_3	3	1	8	1.8	NA	QEP2_210813_AB_153
Q9UQE7	Q9UQE7	Structural maintenance of chromosomes protein 3	SMC3	MNLPGEVTFLPLNK_2	Control	C_3	3	1	8	1.8	NA	QEP2_210813_AB_153
Q9UQE7	Q9UQE7	Structural maintenance of chromosomes protein 3	SMC3	MNLPGEVTFLPLNKLDVR_3	Control	C_3	3	1	8	1.8	NA	QEP2_210813_AB_153
Q9UQE7	Q9UQE7	Structural maintenance of chromosomes protein 3	SMC3	NDVMNLLESAGFSR_2	Control	C_3	3	1	8	1.8	NA	QEP2_210813_AB_153
Q9UQE7	Q9UQE7	Structural maintenance of chromosomes protein 3	SMC3	NFSEVFQK_2	Control	C_3	3	1	8	1.8	NA	QEP2_210813_AB_153
Q9UQE7	Q9UQE7	Structural maintenance of chromosomes protein 3	SMC3	NLEQYNKLDQDLNEVK_3	Control	C_3	3	1	8	1.8	NA	QEP2_210813_AB_153
Q9UQE7	Q9UQE7	Structural maintenance of chromosomes protein 3	SMC3	NYLWREENAEQQALAAK_3	Control	C_3	3	1	8	1.8	NA	QEP2_210813_AB_153
Q9UQE7	Q9UQE7	Structural maintenance of chromosomes protein 3	SMC3	RALEYTIYNQELNETR_3	Control	C_3	3	1	8	1.8	NA	QEP2_210813_AB_153
Q9UQE7	Q9UQE7	Structural maintenance of chromosomes protein 3	SMC3	RQEELDR_2	Control	C_3	3	1	8	1.8	NA	QEP2_210813_AB_153
Q9UQE7	Q9UQE7	Structural maintenance of chromosomes protein 3	SMC3	RVDALNDEIR_2	Control	C_3	3	1	8	1.8	NA	QEP2_210813_AB_153
Q9UQE7	Q9UQE7	Structural maintenance of chromosomes protein 3	SMC3	SEDLDNSIDKTEAGIKELQK_3	Control	C_3	3	1	8	1.8	NA	QEP2_210813_AB_153
Q9UQE7	Q9UQE7	Structural maintenance of chromosomes protein 3	SMC3	SEDLDNSIDKTEAGIKELQK_4	Control	C_3	3	1	8	1.8	NA	QEP2_210813_AB_153
Q9UQE7	Q9UQE7	Structural maintenance of chromosomes protein 3	SMC3	SIMELMNVLELR_2	Control	C_3	3	1	8	1.8	NA	QEP2_210813_AB_153
Q9UQE7	Q9UQE7	Structural maintenance of chromosomes protein 3	SMC3	SIMELMNVLELRK_3	Control	C_3	3	1	8	1.8	NA	QEP2_210813_AB_153
Q9UQE7	Q9UQE7	Structural maintenance of chromosomes protein 3	SMC3	SLDQAINDK_2	Control	C_3	3	1	8	1.8	NA	QEP2_210813_AB_153
Q9UQE7	Q9UQE7	Structural maintenance of chromosomes protein 3	SMC3	SLDQAINDKKR_3	Control	C_3	3	1	8	1.8	NA	QEP2_210813_AB_153
Q9UQE7	Q9UQE7	Structural maintenance of chromosomes protein 3	SMC3	SMEVSTQLAR_2	Control	C_3	3	1	8	1.8	NA	QEP2_210813_AB_153
Q9UQE7	Q9UQE7	Structural maintenance of chromosomes protein 3	SMC3	SYRDQTIVDPFSSK_2	Control	C_3	3	1	8	1.8	NA	QEP2_210813_AB_153
Q9UQE7	Q9UQE7	Structural maintenance of chromosomes protein 3	SMC3	SYRDQTIVDPFSSK_3	Control	C_3	3	1	8	1.8	NA	QEP2_210813_AB_153
Q9UQE7	Q9UQE7	Structural maintenance of chromosomes protein 3	SMC3	VDALNDEIR_2	Control	C_3	3	1	8	1.8	NA	QEP2_210813_AB_153
Q9UQE7	Q9UQE7	Structural maintenance of chromosomes protein 3	SMC3	VDALNDEIRQLQQENR_3	Control	C_3	3	1	8	1.8	NA	QEP2_210813_AB_153
Q9UQE7	Q9UQE7	Structural maintenance of chromosomes protein 3	SMC3	VETYLNENLR_2	Control	C_3	3	1	8	1.8	NA	QEP2_210813_AB_153
Q9UQE7	Q9UQE7	Structural maintenance of chromosomes protein 3	SMC3	VKDTMAR_2	Control	C_3	3	1	8	1.8	NA	QEP2_210813_AB_153
Q9UQE7	Q9UQE7	Structural maintenance of chromosomes protein 3	SMC3	AKDLQDELAGNSEQR_2	Short	S_1	4	2	1	2.1	NA	QEP2_210813_AB_125
Q9UQE7	Q9UQE7	Structural maintenance of chromosomes protein 3	SMC3	AKDLQDELAGNSEQR_3	Short	S_1	4	2	1	2.1	22.5211	QEP2_210813_AB_125
Q9UQE7	Q9UQE7	Structural maintenance of chromosomes protein 3	SMC3	ALDQFVNFSEQKEK_3	Short	S_1	4	2	1	2.1	21.6505	QEP2_210813_AB_125
Q9UQE7	Q9UQE7	Structural maintenance of chromosomes protein 3	SMC3	ALEYTIYNQELNETR_2	Short	S_1	4	2	1	2.1	21.8091	QEP2_210813_AB_125
Q9UQE7	Q9UQE7	Structural maintenance of chromosomes protein 3	SMC3	DKMEDIER_2	Short	S_1	4	2	1	2.1	NA	QEP2_210813_AB_125
Q9UQE7	Q9UQE7	Structural maintenance of chromosomes protein 3	SMC3	DSILSEMK_2	Short	S_1	4	2	1	2.1	NA	QEP2_210813_AB_125
Q9UQE7	Q9UQE7	Structural maintenance of chromosomes protein 3	SMC3	DTAYPETNDAIPMISK_2	Short	S_1	4	2	1	2.1	NA	QEP2_210813_AB_125
Q9UQE7	Q9UQE7	Structural maintenance of chromosomes protein 3	SMC3	EENAEQQALAAK_2	Short	S_1	4	2	1	2.1	NA	QEP2_210813_AB_125
Q9UQE7	Q9UQE7	Structural maintenance of chromosomes protein 3	SMC3	EMQQLSGGQK_2	Short	S_1	4	2	1	2.1	22.209	QEP2_210813_AB_125
Q9UQE7	Q9UQE7	Structural maintenance of chromosomes protein 3	SMC3	GALTGGYYDTR_2	Short	S_1	4	2	1	2.1	NA	QEP2_210813_AB_125
Q9UQE7	Q9UQE7	Structural maintenance of chromosomes protein 3	SMC3	GSGSQSSVPSVDQFTGVGIR_2	Short	S_1	4	2	1	2.1	22.7824	QEP2_210813_AB_125
Q9UQE7	Q9UQE7	Structural maintenance of chromosomes protein 3	SMC3	ILMEFNK_2	Short	S_1	4	2	1	2.1	NA	QEP2_210813_AB_125
Q9UQE7	Q9UQE7	Structural maintenance of chromosomes protein 3	SMC3	INNEIDQLMNQMQQIETQQR_3	Short	S_1	4	2	1	2.1	22.6756	QEP2_210813_AB_125
Q9UQE7	Q9UQE7	Structural maintenance of chromosomes protein 3	SMC3	INQMATAPDSQR_2	Short	S_1	4	2	1	2.1	NA	QEP2_210813_AB_125
Q9UQE7	Q9UQE7	Structural maintenance of chromosomes protein 3	SMC3	IRELGSLPQEAFEK_3	Short	S_1	4	2	1	2.1	21.9166	QEP2_210813_AB_125
Q9UQE7	Q9UQE7	Structural maintenance of chromosomes protein 3	SMC3	IRELGSLPQEAFEKYQTLSLK_3	Short	S_1	4	2	1	2.1	NA	QEP2_210813_AB_125
Q9UQE7	Q9UQE7	Structural maintenance of chromosomes protein 3	SMC3	ISAMKEEKEQLSAER_3	Short	S_1	4	2	1	2.1	NA	QEP2_210813_AB_125
Q9UQE7	Q9UQE7	Structural maintenance of chromosomes protein 3	SMC3	KAEEELGELEAK_3	Short	S_1	4	2	1	2.1	21.6809	QEP2_210813_AB_125
Q9UQE7	Q9UQE7	Structural maintenance of chromosomes protein 3	SMC3	KEESISLMK_2	Short	S_1	4	2	1	2.1	21.0207	QEP2_210813_AB_125
Q9UQE7	Q9UQE7	Structural maintenance of chromosomes protein 3	SMC3	KGDVEGSQSQDEGEGSGESER_3	Short	S_1	4	2	1	2.1	22.4011	QEP2_210813_AB_125
Q9UQE7	Q9UQE7	Structural maintenance of chromosomes protein 3	SMC3	KGDVEGSQSQDEGEGSGESERGSGSQSSVPSVDQFTGVGIR_4	Short	S_1	4	2	1	2.1	NA	QEP2_210813_AB_125
Q9UQE7	Q9UQE7	Structural maintenance of chromosomes protein 3	SMC3	KYEAIQLTFK_3	Short	S_1	4	2	1	2.1	NA	QEP2_210813_AB_125
Q9UQE7	Q9UQE7	Structural maintenance of chromosomes protein 3	SMC3	LALLHEGTGPR_2	Short	S_1	4	2	1	2.1	21.9919	QEP2_210813_AB_125
Q9UQE7	Q9UQE7	Structural maintenance of chromosomes protein 3	SMC3	LDVRDTAYPETNDAIPMISK_3	Short	S_1	4	2	1	2.1	NA	QEP2_210813_AB_125
Q9UQE7	Q9UQE7	Structural maintenance of chromosomes protein 3	SMC3	LFYHIVDSDEVSTK_3	Short	S_1	4	2	1	2.1	21.9028	QEP2_210813_AB_125
Q9UQE7	Q9UQE7	Structural maintenance of chromosomes protein 3	SMC3	MNLPGEVTFLPLNK_2	Short	S_1	4	2	1	2.1	NA	QEP2_210813_AB_125
Q9UQE7	Q9UQE7	Structural maintenance of chromosomes protein 3	SMC3	MNLPGEVTFLPLNKLDVR_3	Short	S_1	4	2	1	2.1	NA	QEP2_210813_AB_125
Q9UQE7	Q9UQE7	Structural maintenance of chromosomes protein 3	SMC3	NDVMNLLESAGFSR_2	Short	S_1	4	2	1	2.1	21.4323	QEP2_210813_AB_125
Q9UQE7	Q9UQE7	Structural maintenance of chromosomes protein 3	SMC3	NFSEVFQK_2	Short	S_1	4	2	1	2.1	21.1589	QEP2_210813_AB_125
Q9UQE7	Q9UQE7	Structural maintenance of chromosomes protein 3	SMC3	NLEQYNKLDQDLNEVK_3	Short	S_1	4	2	1	2.1	22.4659	QEP2_210813_AB_125
Q9UQE7	Q9UQE7	Structural maintenance of chromosomes protein 3	SMC3	NYLWREENAEQQALAAK_3	Short	S_1	4	2	1	2.1	NA	QEP2_210813_AB_125
Q9UQE7	Q9UQE7	Structural maintenance of chromosomes protein 3	SMC3	RALEYTIYNQELNETR_3	Short	S_1	4	2	1	2.1	NA	QEP2_210813_AB_125
Q9UQE7	Q9UQE7	Structural maintenance of chromosomes protein 3	SMC3	RQEELDR_2	Short	S_1	4	2	1	2.1	21.1413	QEP2_210813_AB_125
Q9UQE7	Q9UQE7	Structural maintenance of chromosomes protein 3	SMC3	RVDALNDEIR_2	Short	S_1	4	2	1	2.1	21.0877	QEP2_210813_AB_125
Q9UQE7	Q9UQE7	Structural maintenance of chromosomes protein 3	SMC3	SEDLDNSIDKTEAGIKELQK_3	Short	S_1	4	2	1	2.1	20.8779	QEP2_210813_AB_125
Q9UQE7	Q9UQE7	Structural maintenance of chromosomes protein 3	SMC3	SEDLDNSIDKTEAGIKELQK_4	Short	S_1	4	2	1	2.1	NA	QEP2_210813_AB_125
Q9UQE7	Q9UQE7	Structural maintenance of chromosomes protein 3	SMC3	SIMELMNVLELR_2	Short	S_1	4	2	1	2.1	21.0364	QEP2_210813_AB_125
Q9UQE7	Q9UQE7	Structural maintenance of chromosomes protein 3	SMC3	SIMELMNVLELRK_3	Short	S_1	4	2	1	2.1	NA	QEP2_210813_AB_125
Q9UQE7	Q9UQE7	Structural maintenance of chromosomes protein 3	SMC3	SLDQAINDK_2	Short	S_1	4	2	1	2.1	21.6275	QEP2_210813_AB_125
Q9UQE7	Q9UQE7	Structural maintenance of chromosomes protein 3	SMC3	SLDQAINDKKR_3	Short	S_1	4	2	1	2.1	NA	QEP2_210813_AB_125
Q9UQE7	Q9UQE7	Structural maintenance of chromosomes protein 3	SMC3	SMEVSTQLAR_2	Short	S_1	4	2	1	2.1	NA	QEP2_210813_AB_125
Q9UQE7	Q9UQE7	Structural maintenance of chromosomes protein 3	SMC3	SYRDQTIVDPFSSK_2	Short	S_1	4	2	1	2.1	NA	QEP2_210813_AB_125
Q9UQE7	Q9UQE7	Structural maintenance of chromosomes protein 3	SMC3	SYRDQTIVDPFSSK_3	Short	S_1	4	2	1	2.1	21.9626	QEP2_210813_AB_125
Q9UQE7	Q9UQE7	Structural maintenance of chromosomes protein 3	SMC3	VDALNDEIR_2	Short	S_1	4	2	1	2.1	NA	QEP2_210813_AB_125
Q9UQE7	Q9UQE7	Structural maintenance of chromosomes protein 3	SMC3	VDALNDEIRQLQQENR_3	Short	S_1	4	2	1	2.1	NA	QEP2_210813_AB_125
Q9UQE7	Q9UQE7	Structural maintenance of chromosomes protein 3	SMC3	VETYLNENLR_2	Short	S_1	4	2	1	2.1	21.9086	QEP2_210813_AB_125
Q9UQE7	Q9UQE7	Structural maintenance of chromosomes protein 3	SMC3	VKDTMAR_2	Short	S_1	4	2	1	2.1	NA	QEP2_210813_AB_125
Q9UQE7	Q9UQE7	Structural maintenance of chromosomes protein 3	SMC3	AKDLQDELAGNSEQR_2	Short	S_2	5	2	6	2.6	20.987	QEP2_210813_AB_145
Q9UQE7	Q9UQE7	Structural maintenance of chromosomes protein 3	SMC3	AKDLQDELAGNSEQR_3	Short	S_2	5	2	6	2.6	23.2354	QEP2_210813_AB_145
Q9UQE7	Q9UQE7	Structural maintenance of chromosomes protein 3	SMC3	ALDQFVNFSEQKEK_3	Short	S_2	5	2	6	2.6	23.4246	QEP2_210813_AB_145
Q9UQE7	Q9UQE7	Structural maintenance of chromosomes protein 3	SMC3	ALEYTIYNQELNETR_2	Short	S_2	5	2	6	2.6	23.6559	QEP2_210813_AB_145
Q9UQE7	Q9UQE7	Structural maintenance of chromosomes protein 3	SMC3	DKMEDIER_2	Short	S_2	5	2	6	2.6	NA	QEP2_210813_AB_145
Q9UQE7	Q9UQE7	Structural maintenance of chromosomes protein 3	SMC3	DSILSEMK_2	Short	S_2	5	2	6	2.6	22.7177	QEP2_210813_AB_145
Q9UQE7	Q9UQE7	Structural maintenance of chromosomes protein 3	SMC3	DTAYPETNDAIPMISK_2	Short	S_2	5	2	6	2.6	21.1017	QEP2_210813_AB_145
Q9UQE7	Q9UQE7	Structural maintenance of chromosomes protein 3	SMC3	EENAEQQALAAK_2	Short	S_2	5	2	6	2.6	NA	QEP2_210813_AB_145
Q9UQE7	Q9UQE7	Structural maintenance of chromosomes protein 3	SMC3	EMQQLSGGQK_2	Short	S_2	5	2	6	2.6	22.4921	QEP2_210813_AB_145
Q9UQE7	Q9UQE7	Structural maintenance of chromosomes protein 3	SMC3	GALTGGYYDTR_2	Short	S_2	5	2	6	2.6	22.9924	QEP2_210813_AB_145
Q9UQE7	Q9UQE7	Structural maintenance of chromosomes protein 3	SMC3	GSGSQSSVPSVDQFTGVGIR_2	Short	S_2	5	2	6	2.6	22.1116	QEP2_210813_AB_145
Q9UQE7	Q9UQE7	Structural maintenance of chromosomes protein 3	SMC3	ILMEFNK_2	Short	S_2	5	2	6	2.6	21.8585	QEP2_210813_AB_145
Q9UQE7	Q9UQE7	Structural maintenance of chromosomes protein 3	SMC3	INNEIDQLMNQMQQIETQQR_3	Short	S_2	5	2	6	2.6	NA	QEP2_210813_AB_145
Q9UQE7	Q9UQE7	Structural maintenance of chromosomes protein 3	SMC3	INQMATAPDSQR_2	Short	S_2	5	2	6	2.6	24.4031	QEP2_210813_AB_145
Q9UQE7	Q9UQE7	Structural maintenance of chromosomes protein 3	SMC3	IRELGSLPQEAFEK_3	Short	S_2	5	2	6	2.6	20.7104	QEP2_210813_AB_145
Q9UQE7	Q9UQE7	Structural maintenance of chromosomes protein 3	SMC3	IRELGSLPQEAFEKYQTLSLK_3	Short	S_2	5	2	6	2.6	21.1065	QEP2_210813_AB_145
Q9UQE7	Q9UQE7	Structural maintenance of chromosomes protein 3	SMC3	ISAMKEEKEQLSAER_3	Short	S_2	5	2	6	2.6	20.7826	QEP2_210813_AB_145
Q9UQE7	Q9UQE7	Structural maintenance of chromosomes protein 3	SMC3	KAEEELGELEAK_3	Short	S_2	5	2	6	2.6	NA	QEP2_210813_AB_145
Q9UQE7	Q9UQE7	Structural maintenance of chromosomes protein 3	SMC3	KEESISLMK_2	Short	S_2	5	2	6	2.6	NA	QEP2_210813_AB_145
Q9UQE7	Q9UQE7	Structural maintenance of chromosomes protein 3	SMC3	KGDVEGSQSQDEGEGSGESER_3	Short	S_2	5	2	6	2.6	22.2706	QEP2_210813_AB_145
Q9UQE7	Q9UQE7	Structural maintenance of chromosomes protein 3	SMC3	KGDVEGSQSQDEGEGSGESERGSGSQSSVPSVDQFTGVGIR_4	Short	S_2	5	2	6	2.6	22.4463	QEP2_210813_AB_145
Q9UQE7	Q9UQE7	Structural maintenance of chromosomes protein 3	SMC3	KYEAIQLTFK_3	Short	S_2	5	2	6	2.6	20.7937	QEP2_210813_AB_145
Q9UQE7	Q9UQE7	Structural maintenance of chromosomes protein 3	SMC3	LALLHEGTGPR_2	Short	S_2	5	2	6	2.6	21.9829	QEP2_210813_AB_145
Q9UQE7	Q9UQE7	Structural maintenance of chromosomes protein 3	SMC3	LDVRDTAYPETNDAIPMISK_3	Short	S_2	5	2	6	2.6	22.9076	QEP2_210813_AB_145
Q9UQE7	Q9UQE7	Structural maintenance of chromosomes protein 3	SMC3	LFYHIVDSDEVSTK_3	Short	S_2	5	2	6	2.6	NA	QEP2_210813_AB_145
Q9UQE7	Q9UQE7	Structural maintenance of chromosomes protein 3	SMC3	MNLPGEVTFLPLNK_2	Short	S_2	5	2	6	2.6	22.1966	QEP2_210813_AB_145
Q9UQE7	Q9UQE7	Structural maintenance of chromosomes protein 3	SMC3	MNLPGEVTFLPLNKLDVR_3	Short	S_2	5	2	6	2.6	NA	QEP2_210813_AB_145
Q9UQE7	Q9UQE7	Structural maintenance of chromosomes protein 3	SMC3	NDVMNLLESAGFSR_2	Short	S_2	5	2	6	2.6	21.3583	QEP2_210813_AB_145
Q9UQE7	Q9UQE7	Structural maintenance of chromosomes protein 3	SMC3	NFSEVFQK_2	Short	S_2	5	2	6	2.6	22.4701	QEP2_210813_AB_145
Q9UQE7	Q9UQE7	Structural maintenance of chromosomes protein 3	SMC3	NLEQYNKLDQDLNEVK_3	Short	S_2	5	2	6	2.6	NA	QEP2_210813_AB_145
Q9UQE7	Q9UQE7	Structural maintenance of chromosomes protein 3	SMC3	NYLWREENAEQQALAAK_3	Short	S_2	5	2	6	2.6	21.7509	QEP2_210813_AB_145
Q9UQE7	Q9UQE7	Structural maintenance of chromosomes protein 3	SMC3	RALEYTIYNQELNETR_3	Short	S_2	5	2	6	2.6	NA	QEP2_210813_AB_145
Q9UQE7	Q9UQE7	Structural maintenance of chromosomes protein 3	SMC3	RQEELDR_2	Short	S_2	5	2	6	2.6	21.5134	QEP2_210813_AB_145
Q9UQE7	Q9UQE7	Structural maintenance of chromosomes protein 3	SMC3	RVDALNDEIR_2	Short	S_2	5	2	6	2.6	NA	QEP2_210813_AB_145
Q9UQE7	Q9UQE7	Structural maintenance of chromosomes protein 3	SMC3	SEDLDNSIDKTEAGIKELQK_3	Short	S_2	5	2	6	2.6	23.3329	QEP2_210813_AB_145
Q9UQE7	Q9UQE7	Structural maintenance of chromosomes protein 3	SMC3	SEDLDNSIDKTEAGIKELQK_4	Short	S_2	5	2	6	2.6	22.5423	QEP2_210813_AB_145
Q9UQE7	Q9UQE7	Structural maintenance of chromosomes protein 3	SMC3	SIMELMNVLELR_2	Short	S_2	5	2	6	2.6	NA	QEP2_210813_AB_145
Q9UQE7	Q9UQE7	Structural maintenance of chromosomes protein 3	SMC3	SIMELMNVLELRK_3	Short	S_2	5	2	6	2.6	NA	QEP2_210813_AB_145
Q9UQE7	Q9UQE7	Structural maintenance of chromosomes protein 3	SMC3	SLDQAINDK_2	Short	S_2	5	2	6	2.6	NA	QEP2_210813_AB_145
Q9UQE7	Q9UQE7	Structural maintenance of chromosomes protein 3	SMC3	SLDQAINDKKR_3	Short	S_2	5	2	6	2.6	24.7909	QEP2_210813_AB_145
Q9UQE7	Q9UQE7	Structural maintenance of chromosomes protein 3	SMC3	SMEVSTQLAR_2	Short	S_2	5	2	6	2.6	23.4264	QEP2_210813_AB_145
Q9UQE7	Q9UQE7	Structural maintenance of chromosomes protein 3	SMC3	SYRDQTIVDPFSSK_2	Short	S_2	5	2	6	2.6	NA	QEP2_210813_AB_145
Q9UQE7	Q9UQE7	Structural maintenance of chromosomes protein 3	SMC3	SYRDQTIVDPFSSK_3	Short	S_2	5	2	6	2.6	21.8264	QEP2_210813_AB_145
Q9UQE7	Q9UQE7	Structural maintenance of chromosomes protein 3	SMC3	VDALNDEIR_2	Short	S_2	5	2	6	2.6	NA	QEP2_210813_AB_145
Q9UQE7	Q9UQE7	Structural maintenance of chromosomes protein 3	SMC3	VDALNDEIRQLQQENR_3	Short	S_2	5	2	6	2.6	21.2516	QEP2_210813_AB_145
Q9UQE7	Q9UQE7	Structural maintenance of chromosomes protein 3	SMC3	VETYLNENLR_2	Short	S_2	5	2	6	2.6	NA	QEP2_210813_AB_145
Q9UQE7	Q9UQE7	Structural maintenance of chromosomes protein 3	SMC3	VKDTMAR_2	Short	S_2	5	2	6	2.6	22.5797	QEP2_210813_AB_145
Q9UQE7	Q9UQE7	Structural maintenance of chromosomes protein 3	SMC3	AKDLQDELAGNSEQR_2	Short	S_3	6	2	9	2.9	21.915	QEP2_210813_AB_157
Q9UQE7	Q9UQE7	Structural maintenance of chromosomes protein 3	SMC3	AKDLQDELAGNSEQR_3	Short	S_3	6	2	9	2.9	23.8696	QEP2_210813_AB_157
Q9UQE7	Q9UQE7	Structural maintenance of chromosomes protein 3	SMC3	ALDQFVNFSEQKEK_3	Short	S_3	6	2	9	2.9	NA	QEP2_210813_AB_157
Q9UQE7	Q9UQE7	Structural maintenance of chromosomes protein 3	SMC3	ALEYTIYNQELNETR_2	Short	S_3	6	2	9	2.9	22.8309	QEP2_210813_AB_157
Q9UQE7	Q9UQE7	Structural maintenance of chromosomes protein 3	SMC3	DKMEDIER_2	Short	S_3	6	2	9	2.9	NA	QEP2_210813_AB_157
Q9UQE7	Q9UQE7	Structural maintenance of chromosomes protein 3	SMC3	DSILSEMK_2	Short	S_3	6	2	9	2.9	22.9546	QEP2_210813_AB_157
Q9UQE7	Q9UQE7	Structural maintenance of chromosomes protein 3	SMC3	DTAYPETNDAIPMISK_2	Short	S_3	6	2	9	2.9	21.4942	QEP2_210813_AB_157
Q9UQE7	Q9UQE7	Structural maintenance of chromosomes protein 3	SMC3	EENAEQQALAAK_2	Short	S_3	6	2	9	2.9	22.4104	QEP2_210813_AB_157
Q9UQE7	Q9UQE7	Structural maintenance of chromosomes protein 3	SMC3	EMQQLSGGQK_2	Short	S_3	6	2	9	2.9	23.3012	QEP2_210813_AB_157
Q9UQE7	Q9UQE7	Structural maintenance of chromosomes protein 3	SMC3	GALTGGYYDTR_2	Short	S_3	6	2	9	2.9	23.0776	QEP2_210813_AB_157
Q9UQE7	Q9UQE7	Structural maintenance of chromosomes protein 3	SMC3	GSGSQSSVPSVDQFTGVGIR_2	Short	S_3	6	2	9	2.9	23.0396	QEP2_210813_AB_157
Q9UQE7	Q9UQE7	Structural maintenance of chromosomes protein 3	SMC3	ILMEFNK_2	Short	S_3	6	2	9	2.9	22.695	QEP2_210813_AB_157
Q9UQE7	Q9UQE7	Structural maintenance of chromosomes protein 3	SMC3	INNEIDQLMNQMQQIETQQR_3	Short	S_3	6	2	9	2.9	NA	QEP2_210813_AB_157
Q9UQE7	Q9UQE7	Structural maintenance of chromosomes protein 3	SMC3	INQMATAPDSQR_2	Short	S_3	6	2	9	2.9	24.5123	QEP2_210813_AB_157
Q9UQE7	Q9UQE7	Structural maintenance of chromosomes protein 3	SMC3	IRELGSLPQEAFEK_3	Short	S_3	6	2	9	2.9	22.2904	QEP2_210813_AB_157
Q9UQE7	Q9UQE7	Structural maintenance of chromosomes protein 3	SMC3	IRELGSLPQEAFEKYQTLSLK_3	Short	S_3	6	2	9	2.9	21.0336	QEP2_210813_AB_157
Q9UQE7	Q9UQE7	Structural maintenance of chromosomes protein 3	SMC3	ISAMKEEKEQLSAER_3	Short	S_3	6	2	9	2.9	21.3647	QEP2_210813_AB_157
Q9UQE7	Q9UQE7	Structural maintenance of chromosomes protein 3	SMC3	KAEEELGELEAK_3	Short	S_3	6	2	9	2.9	23.5456	QEP2_210813_AB_157
Q9UQE7	Q9UQE7	Structural maintenance of chromosomes protein 3	SMC3	KEESISLMK_2	Short	S_3	6	2	9	2.9	20.4378	QEP2_210813_AB_157
Q9UQE7	Q9UQE7	Structural maintenance of chromosomes protein 3	SMC3	KGDVEGSQSQDEGEGSGESER_3	Short	S_3	6	2	9	2.9	22.4679	QEP2_210813_AB_157
Q9UQE7	Q9UQE7	Structural maintenance of chromosomes protein 3	SMC3	KGDVEGSQSQDEGEGSGESERGSGSQSSVPSVDQFTGVGIR_4	Short	S_3	6	2	9	2.9	21.8782	QEP2_210813_AB_157
Q9UQE7	Q9UQE7	Structural maintenance of chromosomes protein 3	SMC3	KYEAIQLTFK_3	Short	S_3	6	2	9	2.9	21.2341	QEP2_210813_AB_157
Q9UQE7	Q9UQE7	Structural maintenance of chromosomes protein 3	SMC3	LALLHEGTGPR_2	Short	S_3	6	2	9	2.9	21.5861	QEP2_210813_AB_157
Q9UQE7	Q9UQE7	Structural maintenance of chromosomes protein 3	SMC3	LDVRDTAYPETNDAIPMISK_3	Short	S_3	6	2	9	2.9	NA	QEP2_210813_AB_157
Q9UQE7	Q9UQE7	Structural maintenance of chromosomes protein 3	SMC3	LFYHIVDSDEVSTK_3	Short	S_3	6	2	9	2.9	22.1784	QEP2_210813_AB_157
Q9UQE7	Q9UQE7	Structural maintenance of chromosomes protein 3	SMC3	MNLPGEVTFLPLNK_2	Short	S_3	6	2	9	2.9	22.9585	QEP2_210813_AB_157
Q9UQE7	Q9UQE7	Structural maintenance of chromosomes protein 3	SMC3	MNLPGEVTFLPLNKLDVR_3	Short	S_3	6	2	9	2.9	20.5617	QEP2_210813_AB_157
Q9UQE7	Q9UQE7	Structural maintenance of chromosomes protein 3	SMC3	NDVMNLLESAGFSR_2	Short	S_3	6	2	9	2.9	NA	QEP2_210813_AB_157
Q9UQE7	Q9UQE7	Structural maintenance of chromosomes protein 3	SMC3	NFSEVFQK_2	Short	S_3	6	2	9	2.9	22.6342	QEP2_210813_AB_157
Q9UQE7	Q9UQE7	Structural maintenance of chromosomes protein 3	SMC3	NLEQYNKLDQDLNEVK_3	Short	S_3	6	2	9	2.9	NA	QEP2_210813_AB_157
Q9UQE7	Q9UQE7	Structural maintenance of chromosomes protein 3	SMC3	NYLWREENAEQQALAAK_3	Short	S_3	6	2	9	2.9	20.9354	QEP2_210813_AB_157
Q9UQE7	Q9UQE7	Structural maintenance of chromosomes protein 3	SMC3	RALEYTIYNQELNETR_3	Short	S_3	6	2	9	2.9	22.2056	QEP2_210813_AB_157
Q9UQE7	Q9UQE7	Structural maintenance of chromosomes protein 3	SMC3	RQEELDR_2	Short	S_3	6	2	9	2.9	NA	QEP2_210813_AB_157
Q9UQE7	Q9UQE7	Structural maintenance of chromosomes protein 3	SMC3	RVDALNDEIR_2	Short	S_3	6	2	9	2.9	21.0191	QEP2_210813_AB_157
Q9UQE7	Q9UQE7	Structural maintenance of chromosomes protein 3	SMC3	SEDLDNSIDKTEAGIKELQK_3	Short	S_3	6	2	9	2.9	23.3473	QEP2_210813_AB_157
Q9UQE7	Q9UQE7	Structural maintenance of chromosomes protein 3	SMC3	SEDLDNSIDKTEAGIKELQK_4	Short	S_3	6	2	9	2.9	23.2387	QEP2_210813_AB_157
Q9UQE7	Q9UQE7	Structural maintenance of chromosomes protein 3	SMC3	SIMELMNVLELR_2	Short	S_3	6	2	9	2.9	19.1818	QEP2_210813_AB_157
Q9UQE7	Q9UQE7	Structural maintenance of chromosomes protein 3	SMC3	SIMELMNVLELRK_3	Short	S_3	6	2	9	2.9	19.2028	QEP2_210813_AB_157
Q9UQE7	Q9UQE7	Structural maintenance of chromosomes protein 3	SMC3	SLDQAINDK_2	Short	S_3	6	2	9	2.9	NA	QEP2_210813_AB_157
Q9UQE7	Q9UQE7	Structural maintenance of chromosomes protein 3	SMC3	SLDQAINDKKR_3	Short	S_3	6	2	9	2.9	23.7339	QEP2_210813_AB_157
Q9UQE7	Q9UQE7	Structural maintenance of chromosomes protein 3	SMC3	SMEVSTQLAR_2	Short	S_3	6	2	9	2.9	23.2228	QEP2_210813_AB_157
Q9UQE7	Q9UQE7	Structural maintenance of chromosomes protein 3	SMC3	SYRDQTIVDPFSSK_2	Short	S_3	6	2	9	2.9	20.1546	QEP2_210813_AB_157
Q9UQE7	Q9UQE7	Structural maintenance of chromosomes protein 3	SMC3	SYRDQTIVDPFSSK_3	Short	S_3	6	2	9	2.9	22.8991	QEP2_210813_AB_157
Q9UQE7	Q9UQE7	Structural maintenance of chromosomes protein 3	SMC3	VDALNDEIR_2	Short	S_3	6	2	9	2.9	22.595	QEP2_210813_AB_157
Q9UQE7	Q9UQE7	Structural maintenance of chromosomes protein 3	SMC3	VDALNDEIRQLQQENR_3	Short	S_3	6	2	9	2.9	20.1061	QEP2_210813_AB_157
Q9UQE7	Q9UQE7	Structural maintenance of chromosomes protein 3	SMC3	VETYLNENLR_2	Short	S_3	6	2	9	2.9	22.4332	QEP2_210813_AB_157
Q9UQE7	Q9UQE7	Structural maintenance of chromosomes protein 3	SMC3	VKDTMAR_2	Short	S_3	6	2	9	2.9	NA	QEP2_210813_AB_157
Q9UQE7	Q9UQE7	Structural maintenance of chromosomes protein 3	SMC3	AKDLQDELAGNSEQR_2	Long	L_1	7	3	2	3.2	NA	QEP2_210813_AB_129
Q9UQE7	Q9UQE7	Structural maintenance of chromosomes protein 3	SMC3	AKDLQDELAGNSEQR_3	Long	L_1	7	3	2	3.2	22.4692	QEP2_210813_AB_129
Q9UQE7	Q9UQE7	Structural maintenance of chromosomes protein 3	SMC3	ALDQFVNFSEQKEK_3	Long	L_1	7	3	2	3.2	NA	QEP2_210813_AB_129
Q9UQE7	Q9UQE7	Structural maintenance of chromosomes protein 3	SMC3	ALEYTIYNQELNETR_2	Long	L_1	7	3	2	3.2	20.8608	QEP2_210813_AB_129
Q9UQE7	Q9UQE7	Structural maintenance of chromosomes protein 3	SMC3	DKMEDIER_2	Long	L_1	7	3	2	3.2	23.7368	QEP2_210813_AB_129
Q9UQE7	Q9UQE7	Structural maintenance of chromosomes protein 3	SMC3	DSILSEMK_2	Long	L_1	7	3	2	3.2	21.4566	QEP2_210813_AB_129
Q9UQE7	Q9UQE7	Structural maintenance of chromosomes protein 3	SMC3	DTAYPETNDAIPMISK_2	Long	L_1	7	3	2	3.2	NA	QEP2_210813_AB_129
Q9UQE7	Q9UQE7	Structural maintenance of chromosomes protein 3	SMC3	EENAEQQALAAK_2	Long	L_1	7	3	2	3.2	22.2994	QEP2_210813_AB_129
Q9UQE7	Q9UQE7	Structural maintenance of chromosomes protein 3	SMC3	EMQQLSGGQK_2	Long	L_1	7	3	2	3.2	22.5643	QEP2_210813_AB_129
Q9UQE7	Q9UQE7	Structural maintenance of chromosomes protein 3	SMC3	GALTGGYYDTR_2	Long	L_1	7	3	2	3.2	NA	QEP2_210813_AB_129
Q9UQE7	Q9UQE7	Structural maintenance of chromosomes protein 3	SMC3	GSGSQSSVPSVDQFTGVGIR_2	Long	L_1	7	3	2	3.2	22.4419	QEP2_210813_AB_129
Q9UQE7	Q9UQE7	Structural maintenance of chromosomes protein 3	SMC3	ILMEFNK_2	Long	L_1	7	3	2	3.2	21.6366	QEP2_210813_AB_129
Q9UQE7	Q9UQE7	Structural maintenance of chromosomes protein 3	SMC3	INNEIDQLMNQMQQIETQQR_3	Long	L_1	7	3	2	3.2	21.7365	QEP2_210813_AB_129
Q9UQE7	Q9UQE7	Structural maintenance of chromosomes protein 3	SMC3	INQMATAPDSQR_2	Long	L_1	7	3	2	3.2	23.7318	QEP2_210813_AB_129
Q9UQE7	Q9UQE7	Structural maintenance of chromosomes protein 3	SMC3	IRELGSLPQEAFEK_3	Long	L_1	7	3	2	3.2	NA	QEP2_210813_AB_129
Q9UQE7	Q9UQE7	Structural maintenance of chromosomes protein 3	SMC3	IRELGSLPQEAFEKYQTLSLK_3	Long	L_1	7	3	2	3.2	NA	QEP2_210813_AB_129
Q9UQE7	Q9UQE7	Structural maintenance of chromosomes protein 3	SMC3	ISAMKEEKEQLSAER_3	Long	L_1	7	3	2	3.2	NA	QEP2_210813_AB_129
Q9UQE7	Q9UQE7	Structural maintenance of chromosomes protein 3	SMC3	KAEEELGELEAK_3	Long	L_1	7	3	2	3.2	NA	QEP2_210813_AB_129
Q9UQE7	Q9UQE7	Structural maintenance of chromosomes protein 3	SMC3	KEESISLMK_2	Long	L_1	7	3	2	3.2	20.37	QEP2_210813_AB_129
Q9UQE7	Q9UQE7	Structural maintenance of chromosomes protein 3	SMC3	KGDVEGSQSQDEGEGSGESER_3	Long	L_1	7	3	2	3.2	21.2341	QEP2_210813_AB_129
Q9UQE7	Q9UQE7	Structural maintenance of chromosomes protein 3	SMC3	KGDVEGSQSQDEGEGSGESERGSGSQSSVPSVDQFTGVGIR_4	Long	L_1	7	3	2	3.2	NA	QEP2_210813_AB_129
Q9UQE7	Q9UQE7	Structural maintenance of chromosomes protein 3	SMC3	KYEAIQLTFK_3	Long	L_1	7	3	2	3.2	20.4026	QEP2_210813_AB_129
Q9UQE7	Q9UQE7	Structural maintenance of chromosomes protein 3	SMC3	LALLHEGTGPR_2	Long	L_1	7	3	2	3.2	21.667	QEP2_210813_AB_129
Q9UQE7	Q9UQE7	Structural maintenance of chromosomes protein 3	SMC3	LDVRDTAYPETNDAIPMISK_3	Long	L_1	7	3	2	3.2	NA	QEP2_210813_AB_129
Q9UQE7	Q9UQE7	Structural maintenance of chromosomes protein 3	SMC3	LFYHIVDSDEVSTK_3	Long	L_1	7	3	2	3.2	21.061	QEP2_210813_AB_129
Q9UQE7	Q9UQE7	Structural maintenance of chromosomes protein 3	SMC3	MNLPGEVTFLPLNK_2	Long	L_1	7	3	2	3.2	22.3467	QEP2_210813_AB_129
Q9UQE7	Q9UQE7	Structural maintenance of chromosomes protein 3	SMC3	MNLPGEVTFLPLNKLDVR_3	Long	L_1	7	3	2	3.2	NA	QEP2_210813_AB_129
Q9UQE7	Q9UQE7	Structural maintenance of chromosomes protein 3	SMC3	NDVMNLLESAGFSR_2	Long	L_1	7	3	2	3.2	21.2911	QEP2_210813_AB_129
Q9UQE7	Q9UQE7	Structural maintenance of chromosomes protein 3	SMC3	NFSEVFQK_2	Long	L_1	7	3	2	3.2	21.6447	QEP2_210813_AB_129
Q9UQE7	Q9UQE7	Structural maintenance of chromosomes protein 3	SMC3	NLEQYNKLDQDLNEVK_3	Long	L_1	7	3	2	3.2	NA	QEP2_210813_AB_129
Q9UQE7	Q9UQE7	Structural maintenance of chromosomes protein 3	SMC3	NYLWREENAEQQALAAK_3	Long	L_1	7	3	2	3.2	NA	QEP2_210813_AB_129
Q9UQE7	Q9UQE7	Structural maintenance of chromosomes protein 3	SMC3	RALEYTIYNQELNETR_3	Long	L_1	7	3	2	3.2	20.9548	QEP2_210813_AB_129
Q9UQE7	Q9UQE7	Structural maintenance of chromosomes protein 3	SMC3	RQEELDR_2	Long	L_1	7	3	2	3.2	NA	QEP2_210813_AB_129
Q9UQE7	Q9UQE7	Structural maintenance of chromosomes protein 3	SMC3	RVDALNDEIR_2	Long	L_1	7	3	2	3.2	20.8256	QEP2_210813_AB_129
Q9UQE7	Q9UQE7	Structural maintenance of chromosomes protein 3	SMC3	SEDLDNSIDKTEAGIKELQK_3	Long	L_1	7	3	2	3.2	NA	QEP2_210813_AB_129
Q9UQE7	Q9UQE7	Structural maintenance of chromosomes protein 3	SMC3	SEDLDNSIDKTEAGIKELQK_4	Long	L_1	7	3	2	3.2	21.4518	QEP2_210813_AB_129
Q9UQE7	Q9UQE7	Structural maintenance of chromosomes protein 3	SMC3	SIMELMNVLELR_2	Long	L_1	7	3	2	3.2	NA	QEP2_210813_AB_129
Q9UQE7	Q9UQE7	Structural maintenance of chromosomes protein 3	SMC3	SIMELMNVLELRK_3	Long	L_1	7	3	2	3.2	NA	QEP2_210813_AB_129
Q9UQE7	Q9UQE7	Structural maintenance of chromosomes protein 3	SMC3	SLDQAINDK_2	Long	L_1	7	3	2	3.2	21.2155	QEP2_210813_AB_129
Q9UQE7	Q9UQE7	Structural maintenance of chromosomes protein 3	SMC3	SLDQAINDKKR_3	Long	L_1	7	3	2	3.2	NA	QEP2_210813_AB_129
Q9UQE7	Q9UQE7	Structural maintenance of chromosomes protein 3	SMC3	SMEVSTQLAR_2	Long	L_1	7	3	2	3.2	22.3286	QEP2_210813_AB_129
Q9UQE7	Q9UQE7	Structural maintenance of chromosomes protein 3	SMC3	SYRDQTIVDPFSSK_2	Long	L_1	7	3	2	3.2	NA	QEP2_210813_AB_129
Q9UQE7	Q9UQE7	Structural maintenance of chromosomes protein 3	SMC3	SYRDQTIVDPFSSK_3	Long	L_1	7	3	2	3.2	NA	QEP2_210813_AB_129
Q9UQE7	Q9UQE7	Structural maintenance of chromosomes protein 3	SMC3	VDALNDEIR_2	Long	L_1	7	3	2	3.2	21.0199	QEP2_210813_AB_129
Q9UQE7	Q9UQE7	Structural maintenance of chromosomes protein 3	SMC3	VDALNDEIRQLQQENR_3	Long	L_1	7	3	2	3.2	NA	QEP2_210813_AB_129
Q9UQE7	Q9UQE7	Structural maintenance of chromosomes protein 3	SMC3	VETYLNENLR_2	Long	L_1	7	3	2	3.2	NA	QEP2_210813_AB_129
Q9UQE7	Q9UQE7	Structural maintenance of chromosomes protein 3	SMC3	VKDTMAR_2	Long	L_1	7	3	2	3.2	NA	QEP2_210813_AB_129
Q9UQE7	Q9UQE7	Structural maintenance of chromosomes protein 3	SMC3	AKDLQDELAGNSEQR_2	Long	L_2	8	3	5	3.5	21.9988	QEP2_210813_AB_141
Q9UQE7	Q9UQE7	Structural maintenance of chromosomes protein 3	SMC3	AKDLQDELAGNSEQR_3	Long	L_2	8	3	5	3.5	23.6811	QEP2_210813_AB_141
Q9UQE7	Q9UQE7	Structural maintenance of chromosomes protein 3	SMC3	ALDQFVNFSEQKEK_3	Long	L_2	8	3	5	3.5	NA	QEP2_210813_AB_141
Q9UQE7	Q9UQE7	Structural maintenance of chromosomes protein 3	SMC3	ALEYTIYNQELNETR_2	Long	L_2	8	3	5	3.5	22.9778	QEP2_210813_AB_141
Q9UQE7	Q9UQE7	Structural maintenance of chromosomes protein 3	SMC3	DKMEDIER_2	Long	L_2	8	3	5	3.5	24.3604	QEP2_210813_AB_141
Q9UQE7	Q9UQE7	Structural maintenance of chromosomes protein 3	SMC3	DSILSEMK_2	Long	L_2	8	3	5	3.5	23.047	QEP2_210813_AB_141
Q9UQE7	Q9UQE7	Structural maintenance of chromosomes protein 3	SMC3	DTAYPETNDAIPMISK_2	Long	L_2	8	3	5	3.5	21.6843	QEP2_210813_AB_141
Q9UQE7	Q9UQE7	Structural maintenance of chromosomes protein 3	SMC3	EENAEQQALAAK_2	Long	L_2	8	3	5	3.5	22.3831	QEP2_210813_AB_141
Q9UQE7	Q9UQE7	Structural maintenance of chromosomes protein 3	SMC3	EMQQLSGGQK_2	Long	L_2	8	3	5	3.5	23.7352	QEP2_210813_AB_141
Q9UQE7	Q9UQE7	Structural maintenance of chromosomes protein 3	SMC3	GALTGGYYDTR_2	Long	L_2	8	3	5	3.5	23.5722	QEP2_210813_AB_141
Q9UQE7	Q9UQE7	Structural maintenance of chromosomes protein 3	SMC3	GSGSQSSVPSVDQFTGVGIR_2	Long	L_2	8	3	5	3.5	22.4749	QEP2_210813_AB_141
Q9UQE7	Q9UQE7	Structural maintenance of chromosomes protein 3	SMC3	ILMEFNK_2	Long	L_2	8	3	5	3.5	22.8787	QEP2_210813_AB_141
Q9UQE7	Q9UQE7	Structural maintenance of chromosomes protein 3	SMC3	INNEIDQLMNQMQQIETQQR_3	Long	L_2	8	3	5	3.5	23.0424	QEP2_210813_AB_141
Q9UQE7	Q9UQE7	Structural maintenance of chromosomes protein 3	SMC3	INQMATAPDSQR_2	Long	L_2	8	3	5	3.5	23.6511	QEP2_210813_AB_141
Q9UQE7	Q9UQE7	Structural maintenance of chromosomes protein 3	SMC3	IRELGSLPQEAFEK_3	Long	L_2	8	3	5	3.5	22.2909	QEP2_210813_AB_141
Q9UQE7	Q9UQE7	Structural maintenance of chromosomes protein 3	SMC3	IRELGSLPQEAFEKYQTLSLK_3	Long	L_2	8	3	5	3.5	21.3047	QEP2_210813_AB_141
Q9UQE7	Q9UQE7	Structural maintenance of chromosomes protein 3	SMC3	ISAMKEEKEQLSAER_3	Long	L_2	8	3	5	3.5	22.6115	QEP2_210813_AB_141
Q9UQE7	Q9UQE7	Structural maintenance of chromosomes protein 3	SMC3	KAEEELGELEAK_3	Long	L_2	8	3	5	3.5	23.0278	QEP2_210813_AB_141
Q9UQE7	Q9UQE7	Structural maintenance of chromosomes protein 3	SMC3	KEESISLMK_2	Long	L_2	8	3	5	3.5	NA	QEP2_210813_AB_141
Q9UQE7	Q9UQE7	Structural maintenance of chromosomes protein 3	SMC3	KGDVEGSQSQDEGEGSGESER_3	Long	L_2	8	3	5	3.5	22.8721	QEP2_210813_AB_141
Q9UQE7	Q9UQE7	Structural maintenance of chromosomes protein 3	SMC3	KGDVEGSQSQDEGEGSGESERGSGSQSSVPSVDQFTGVGIR_4	Long	L_2	8	3	5	3.5	NA	QEP2_210813_AB_141
Q9UQE7	Q9UQE7	Structural maintenance of chromosomes protein 3	SMC3	KYEAIQLTFK_3	Long	L_2	8	3	5	3.5	21.6154	QEP2_210813_AB_141
Q9UQE7	Q9UQE7	Structural maintenance of chromosomes protein 3	SMC3	LALLHEGTGPR_2	Long	L_2	8	3	5	3.5	22.7272	QEP2_210813_AB_141
Q9UQE7	Q9UQE7	Structural maintenance of chromosomes protein 3	SMC3	LDVRDTAYPETNDAIPMISK_3	Long	L_2	8	3	5	3.5	23.4447	QEP2_210813_AB_141
Q9UQE7	Q9UQE7	Structural maintenance of chromosomes protein 3	SMC3	LFYHIVDSDEVSTK_3	Long	L_2	8	3	5	3.5	22.5516	QEP2_210813_AB_141
Q9UQE7	Q9UQE7	Structural maintenance of chromosomes protein 3	SMC3	MNLPGEVTFLPLNK_2	Long	L_2	8	3	5	3.5	24.0634	QEP2_210813_AB_141
Q9UQE7	Q9UQE7	Structural maintenance of chromosomes protein 3	SMC3	MNLPGEVTFLPLNKLDVR_3	Long	L_2	8	3	5	3.5	20.3265	QEP2_210813_AB_141
Q9UQE7	Q9UQE7	Structural maintenance of chromosomes protein 3	SMC3	NDVMNLLESAGFSR_2	Long	L_2	8	3	5	3.5	22.1811	QEP2_210813_AB_141
Q9UQE7	Q9UQE7	Structural maintenance of chromosomes protein 3	SMC3	NFSEVFQK_2	Long	L_2	8	3	5	3.5	22.9091	QEP2_210813_AB_141
Q9UQE7	Q9UQE7	Structural maintenance of chromosomes protein 3	SMC3	NLEQYNKLDQDLNEVK_3	Long	L_2	8	3	5	3.5	23.3408	QEP2_210813_AB_141
Q9UQE7	Q9UQE7	Structural maintenance of chromosomes protein 3	SMC3	NYLWREENAEQQALAAK_3	Long	L_2	8	3	5	3.5	NA	QEP2_210813_AB_141
Q9UQE7	Q9UQE7	Structural maintenance of chromosomes protein 3	SMC3	RALEYTIYNQELNETR_3	Long	L_2	8	3	5	3.5	22.1649	QEP2_210813_AB_141
Q9UQE7	Q9UQE7	Structural maintenance of chromosomes protein 3	SMC3	RQEELDR_2	Long	L_2	8	3	5	3.5	23.5068	QEP2_210813_AB_141
Q9UQE7	Q9UQE7	Structural maintenance of chromosomes protein 3	SMC3	RVDALNDEIR_2	Long	L_2	8	3	5	3.5	NA	QEP2_210813_AB_141
Q9UQE7	Q9UQE7	Structural maintenance of chromosomes protein 3	SMC3	SEDLDNSIDKTEAGIKELQK_3	Long	L_2	8	3	5	3.5	23.5065	QEP2_210813_AB_141
Q9UQE7	Q9UQE7	Structural maintenance of chromosomes protein 3	SMC3	SEDLDNSIDKTEAGIKELQK_4	Long	L_2	8	3	5	3.5	22.8789	QEP2_210813_AB_141
Q9UQE7	Q9UQE7	Structural maintenance of chromosomes protein 3	SMC3	SIMELMNVLELR_2	Long	L_2	8	3	5	3.5	20.1757	QEP2_210813_AB_141
Q9UQE7	Q9UQE7	Structural maintenance of chromosomes protein 3	SMC3	SIMELMNVLELRK_3	Long	L_2	8	3	5	3.5	19.5806	QEP2_210813_AB_141
Q9UQE7	Q9UQE7	Structural maintenance of chromosomes protein 3	SMC3	SLDQAINDK_2	Long	L_2	8	3	5	3.5	NA	QEP2_210813_AB_141
Q9UQE7	Q9UQE7	Structural maintenance of chromosomes protein 3	SMC3	SLDQAINDKKR_3	Long	L_2	8	3	5	3.5	24.6305	QEP2_210813_AB_141
Q9UQE7	Q9UQE7	Structural maintenance of chromosomes protein 3	SMC3	SMEVSTQLAR_2	Long	L_2	8	3	5	3.5	NA	QEP2_210813_AB_141
Q9UQE7	Q9UQE7	Structural maintenance of chromosomes protein 3	SMC3	SYRDQTIVDPFSSK_2	Long	L_2	8	3	5	3.5	20.4719	QEP2_210813_AB_141
Q9UQE7	Q9UQE7	Structural maintenance of chromosomes protein 3	SMC3	SYRDQTIVDPFSSK_3	Long	L_2	8	3	5	3.5	23.1583	QEP2_210813_AB_141
Q9UQE7	Q9UQE7	Structural maintenance of chromosomes protein 3	SMC3	VDALNDEIR_2	Long	L_2	8	3	5	3.5	22.9512	QEP2_210813_AB_141
Q9UQE7	Q9UQE7	Structural maintenance of chromosomes protein 3	SMC3	VDALNDEIRQLQQENR_3	Long	L_2	8	3	5	3.5	20.699	QEP2_210813_AB_141
Q9UQE7	Q9UQE7	Structural maintenance of chromosomes protein 3	SMC3	VETYLNENLR_2	Long	L_2	8	3	5	3.5	22.5054	QEP2_210813_AB_141
Q9UQE7	Q9UQE7	Structural maintenance of chromosomes protein 3	SMC3	VKDTMAR_2	Long	L_2	8	3	5	3.5	22.2658	QEP2_210813_AB_141
Q9UQE7	Q9UQE7	Structural maintenance of chromosomes protein 3	SMC3	AKDLQDELAGNSEQR_2	Long	L_3	9	3	7	3.7	NA	QEP2_210813_AB_149
Q9UQE7	Q9UQE7	Structural maintenance of chromosomes protein 3	SMC3	AKDLQDELAGNSEQR_3	Long	L_3	9	3	7	3.7	22.9806	QEP2_210813_AB_149
Q9UQE7	Q9UQE7	Structural maintenance of chromosomes protein 3	SMC3	ALDQFVNFSEQKEK_3	Long	L_3	9	3	7	3.7	23.2262	QEP2_210813_AB_149
Q9UQE7	Q9UQE7	Structural maintenance of chromosomes protein 3	SMC3	ALEYTIYNQELNETR_2	Long	L_3	9	3	7	3.7	23.0848	QEP2_210813_AB_149
Q9UQE7	Q9UQE7	Structural maintenance of chromosomes protein 3	SMC3	DKMEDIER_2	Long	L_3	9	3	7	3.7	23.2182	QEP2_210813_AB_149
Q9UQE7	Q9UQE7	Structural maintenance of chromosomes protein 3	SMC3	DSILSEMK_2	Long	L_3	9	3	7	3.7	NA	QEP2_210813_AB_149
Q9UQE7	Q9UQE7	Structural maintenance of chromosomes protein 3	SMC3	DTAYPETNDAIPMISK_2	Long	L_3	9	3	7	3.7	NA	QEP2_210813_AB_149
Q9UQE7	Q9UQE7	Structural maintenance of chromosomes protein 3	SMC3	EENAEQQALAAK_2	Long	L_3	9	3	7	3.7	NA	QEP2_210813_AB_149
Q9UQE7	Q9UQE7	Structural maintenance of chromosomes protein 3	SMC3	EMQQLSGGQK_2	Long	L_3	9	3	7	3.7	22.6177	QEP2_210813_AB_149
Q9UQE7	Q9UQE7	Structural maintenance of chromosomes protein 3	SMC3	GALTGGYYDTR_2	Long	L_3	9	3	7	3.7	23.2182	QEP2_210813_AB_149
Q9UQE7	Q9UQE7	Structural maintenance of chromosomes protein 3	SMC3	GSGSQSSVPSVDQFTGVGIR_2	Long	L_3	9	3	7	3.7	21.7942	QEP2_210813_AB_149
Q9UQE7	Q9UQE7	Structural maintenance of chromosomes protein 3	SMC3	ILMEFNK_2	Long	L_3	9	3	7	3.7	NA	QEP2_210813_AB_149
Q9UQE7	Q9UQE7	Structural maintenance of chromosomes protein 3	SMC3	INNEIDQLMNQMQQIETQQR_3	Long	L_3	9	3	7	3.7	NA	QEP2_210813_AB_149
Q9UQE7	Q9UQE7	Structural maintenance of chromosomes protein 3	SMC3	INQMATAPDSQR_2	Long	L_3	9	3	7	3.7	24.2347	QEP2_210813_AB_149
Q9UQE7	Q9UQE7	Structural maintenance of chromosomes protein 3	SMC3	IRELGSLPQEAFEK_3	Long	L_3	9	3	7	3.7	NA	QEP2_210813_AB_149
Q9UQE7	Q9UQE7	Structural maintenance of chromosomes protein 3	SMC3	IRELGSLPQEAFEKYQTLSLK_3	Long	L_3	9	3	7	3.7	NA	QEP2_210813_AB_149
Q9UQE7	Q9UQE7	Structural maintenance of chromosomes protein 3	SMC3	ISAMKEEKEQLSAER_3	Long	L_3	9	3	7	3.7	21.618	QEP2_210813_AB_149
Q9UQE7	Q9UQE7	Structural maintenance of chromosomes protein 3	SMC3	KAEEELGELEAK_3	Long	L_3	9	3	7	3.7	21.3523	QEP2_210813_AB_149
Q9UQE7	Q9UQE7	Structural maintenance of chromosomes protein 3	SMC3	KEESISLMK_2	Long	L_3	9	3	7	3.7	NA	QEP2_210813_AB_149
Q9UQE7	Q9UQE7	Structural maintenance of chromosomes protein 3	SMC3	KGDVEGSQSQDEGEGSGESER_3	Long	L_3	9	3	7	3.7	22.2996	QEP2_210813_AB_149
Q9UQE7	Q9UQE7	Structural maintenance of chromosomes protein 3	SMC3	KGDVEGSQSQDEGEGSGESERGSGSQSSVPSVDQFTGVGIR_4	Long	L_3	9	3	7	3.7	22.7103	QEP2_210813_AB_149
Q9UQE7	Q9UQE7	Structural maintenance of chromosomes protein 3	SMC3	KYEAIQLTFK_3	Long	L_3	9	3	7	3.7	21.6159	QEP2_210813_AB_149
Q9UQE7	Q9UQE7	Structural maintenance of chromosomes protein 3	SMC3	LALLHEGTGPR_2	Long	L_3	9	3	7	3.7	22.0491	QEP2_210813_AB_149
Q9UQE7	Q9UQE7	Structural maintenance of chromosomes protein 3	SMC3	LDVRDTAYPETNDAIPMISK_3	Long	L_3	9	3	7	3.7	22.9888	QEP2_210813_AB_149
Q9UQE7	Q9UQE7	Structural maintenance of chromosomes protein 3	SMC3	LFYHIVDSDEVSTK_3	Long	L_3	9	3	7	3.7	NA	QEP2_210813_AB_149
Q9UQE7	Q9UQE7	Structural maintenance of chromosomes protein 3	SMC3	MNLPGEVTFLPLNK_2	Long	L_3	9	3	7	3.7	22.4881	QEP2_210813_AB_149
Q9UQE7	Q9UQE7	Structural maintenance of chromosomes protein 3	SMC3	MNLPGEVTFLPLNKLDVR_3	Long	L_3	9	3	7	3.7	19.8359	QEP2_210813_AB_149
Q9UQE7	Q9UQE7	Structural maintenance of chromosomes protein 3	SMC3	NDVMNLLESAGFSR_2	Long	L_3	9	3	7	3.7	21.7314	QEP2_210813_AB_149
Q9UQE7	Q9UQE7	Structural maintenance of chromosomes protein 3	SMC3	NFSEVFQK_2	Long	L_3	9	3	7	3.7	22.8775	QEP2_210813_AB_149
Q9UQE7	Q9UQE7	Structural maintenance of chromosomes protein 3	SMC3	NLEQYNKLDQDLNEVK_3	Long	L_3	9	3	7	3.7	22.4831	QEP2_210813_AB_149
Q9UQE7	Q9UQE7	Structural maintenance of chromosomes protein 3	SMC3	NYLWREENAEQQALAAK_3	Long	L_3	9	3	7	3.7	22.8642	QEP2_210813_AB_149
Q9UQE7	Q9UQE7	Structural maintenance of chromosomes protein 3	SMC3	RALEYTIYNQELNETR_3	Long	L_3	9	3	7	3.7	22.1269	QEP2_210813_AB_149
Q9UQE7	Q9UQE7	Structural maintenance of chromosomes protein 3	SMC3	RQEELDR_2	Long	L_3	9	3	7	3.7	NA	QEP2_210813_AB_149
Q9UQE7	Q9UQE7	Structural maintenance of chromosomes protein 3	SMC3	RVDALNDEIR_2	Long	L_3	9	3	7	3.7	NA	QEP2_210813_AB_149
Q9UQE7	Q9UQE7	Structural maintenance of chromosomes protein 3	SMC3	SEDLDNSIDKTEAGIKELQK_3	Long	L_3	9	3	7	3.7	23.8975	QEP2_210813_AB_149
Q9UQE7	Q9UQE7	Structural maintenance of chromosomes protein 3	SMC3	SEDLDNSIDKTEAGIKELQK_4	Long	L_3	9	3	7	3.7	23.4335	QEP2_210813_AB_149
Q9UQE7	Q9UQE7	Structural maintenance of chromosomes protein 3	SMC3	SIMELMNVLELR_2	Long	L_3	9	3	7	3.7	NA	QEP2_210813_AB_149
Q9UQE7	Q9UQE7	Structural maintenance of chromosomes protein 3	SMC3	SIMELMNVLELRK_3	Long	L_3	9	3	7	3.7	18.9293	QEP2_210813_AB_149
Q9UQE7	Q9UQE7	Structural maintenance of chromosomes protein 3	SMC3	SLDQAINDK_2	Long	L_3	9	3	7	3.7	20.6539	QEP2_210813_AB_149
Q9UQE7	Q9UQE7	Structural maintenance of chromosomes protein 3	SMC3	SLDQAINDKKR_3	Long	L_3	9	3	7	3.7	24.4441	QEP2_210813_AB_149
Q9UQE7	Q9UQE7	Structural maintenance of chromosomes protein 3	SMC3	SMEVSTQLAR_2	Long	L_3	9	3	7	3.7	23.6505	QEP2_210813_AB_149
Q9UQE7	Q9UQE7	Structural maintenance of chromosomes protein 3	SMC3	SYRDQTIVDPFSSK_2	Long	L_3	9	3	7	3.7	19.5545	QEP2_210813_AB_149
Q9UQE7	Q9UQE7	Structural maintenance of chromosomes protein 3	SMC3	SYRDQTIVDPFSSK_3	Long	L_3	9	3	7	3.7	22.1481	QEP2_210813_AB_149
Q9UQE7	Q9UQE7	Structural maintenance of chromosomes protein 3	SMC3	VDALNDEIR_2	Long	L_3	9	3	7	3.7	20.7851	QEP2_210813_AB_149
Q9UQE7	Q9UQE7	Structural maintenance of chromosomes protein 3	SMC3	VDALNDEIRQLQQENR_3	Long	L_3	9	3	7	3.7	21.1385	QEP2_210813_AB_149
Q9UQE7	Q9UQE7	Structural maintenance of chromosomes protein 3	SMC3	VETYLNENLR_2	Long	L_3	9	3	7	3.7	NA	QEP2_210813_AB_149
Q9UQE7	Q9UQE7	Structural maintenance of chromosomes protein 3	SMC3	VKDTMAR_2	Long	L_3	9	3	7	3.7	21.5722	QEP2_210813_AB_149
