# Supplementary material for: Cohesin-independent STAG proteins interact with RNA and R-loops and promote complex loading
Source: eLife. 2023 Apr 3;12:e79386. doi: 10.7554/eLife.79386 (PMC10238091; doi:10.7554/eLife.79386)
Supplement: Figure 5—source data 2. [file elife-79386-fig5-data2.xlsx]

## Sheet: MSstats_Group comparison
Protein	LeadProt	ProteinName	GeneName	Label	log2FC	SE	Tvalue	DF	pvalue	adj.pvalue	issue	MissingPercentage	ImputationPercentage
O60216;Q9H4I0	O60216	Double-strand-break repair protein rad21 homolog	RAD21	Long-Control	Inf	NA	NA	NA	NA	0	oneConditionMissing	0.62963	0
Q14683	Q14683	Structural maintenance of chromosomes protein 1A	SMC1A	Long-Control	Inf	NA	NA	NA	NA	0	oneConditionMissing	0.631579	0
Q8N3U4-2	Q8N3U4-2	Cohesin subunit SA-2	STAG2	Long-Control	Inf	NA	NA	NA	NA	0	oneConditionMissing	0.5	0
Q8N3U4;Q9UJ98;Q8TBR4	Q8N3U4	Cohesin subunit SA-2	STAG2	Long-Control	Inf	NA	NA	NA	NA	0	oneConditionMissing	0.991228	0
Q9UQE7	Q9UQE7	Structural maintenance of chromosomes protein 3	SMC3	Long-Control	Inf	NA	NA	NA	NA	0	oneConditionMissing	0.656028	0
O60216;Q9H4I0	O60216	Double-strand-break repair protein rad21 homolog	RAD21	Short-Control	Inf	NA	NA	NA	NA	0	oneConditionMissing	0.611111	0
Q14683	Q14683	Structural maintenance of chromosomes protein 1A	SMC1A	Short-Control	Inf	NA	NA	NA	NA	0	oneConditionMissing	0.660819	0
Q8N3U4-2	Q8N3U4-2	Cohesin subunit SA-2	STAG2	Short-Control	NA	NA	NA	NA	NA	NA	completeMissing	1	0
Q8N3U4;Q9UJ98;Q8TBR4	Q8N3U4	Cohesin subunit SA-2	STAG2	Short-Control	Inf	NA	NA	NA	NA	0	oneConditionMissing	0.5	0
Q9UQE7	Q9UQE7	Structural maintenance of chromosomes protein 3	SMC3	Short-Control	Inf	NA	NA	NA	NA	0	oneConditionMissing	0.677305	0
O60216;Q9H4I0	O60216	Double-strand-break repair protein rad21 homolog	RAD21	Long-Short	0.382842	0.522939	0.732097	4	0.504694	0.992421	NA	0.240741	0
Q14683	Q14683	Structural maintenance of chromosomes protein 1A	SMC1A	Long-Short	0.130538	0.418496	0.311922	4	0.770683	0.992421	NA	0.292398	0
Q8N3U4-2	Q8N3U4-2	Cohesin subunit SA-2	STAG2	Long-Short	Inf	NA	NA	NA	NA	0	oneConditionMissing	0.5	0
Q8N3U4;Q9UJ98;Q8TBR4	Q8N3U4	Cohesin subunit SA-2	STAG2	Long-Short	-2.43616	0.941997	-2.58616	2	0.122615	0.992421	NA	0.491228	0
Q9UQE7	Q9UQE7	Structural maintenance of chromosomes protein 3	SMC3	Long-Short	0.0320598	0.398939	0.0803627	4	0.939809	0.992421	NA	0.333333	0
A0A0B4J1Y9;P0DTE1;A0A0C4DH36;A0A0A0MS15;A0A0B4J1V0;A0A0B4J1V6;A0A075B6Q5;A0A0B4J1X8;P0DP04;P0DP03;P0DP02;A0A0J9YX35;A0A0C4DH32;A0A0B4J1X5;A0A0B4J1V1;A0A0C4DH42;P01764;P01762;P01772;P01780;P01782;P01763;P01766;P01767;P01768	A0A0B4J1Y9	Ig heavy chain V-III region 23;Ig heavy chain V-III region TRO;Ig heavy chain V-III region KOL;Ig heavy chain V-III region JON;Ig heavy chain V-III region DOB;Ig heavy chain V-III region WEA;Ig heavy chain V-III region BRO;Ig heavy chain V-III region BUT;Ig heavy chain V-III region CAM	IGHV3-72;IGHV3-38;IGHV3-49;IGHV3-15;IGHV3-73;IGHV3-64;IGHV3-43;IGHV3-20;IGHV3-74;IGHV3-21;IGHV3-66;IGHV3-23	Long-Control	-2.58032	0.976773	-2.64167	3	0.0775447	0.11421	NA	0.583333	0
A0FGR8	A0FGR8	Extended synaptotagmin-2	ESYT2	Long-Control	Inf	NA	NA	NA	NA	0	oneConditionMissing	0.583333	0
A6NHQ2	A6NHQ2	rRNA/tRNA 2-O-methyltransferase fibrillarin-like protein 1	FBLL1	Long-Control	Inf	NA	NA	NA	NA	0	oneConditionMissing	0.666667	0
A6NHR9	A6NHR9	Structural maintenance of chromosomes flexible hinge domain-containing protein 1	SMCHD1	Long-Control	1.52624	0.282863	5.39567	3	0.0124761	0.027488	NA	0.666667	0
O00148	O00148	ATP-dependent RNA helicase DDX39A	DDX39A	Long-Control	Inf	NA	NA	NA	NA	0	oneConditionMissing	0.666667	0
O00154	O00154	Cytosolic acyl coenzyme A thioester hydrolase	ACOT7	Long-Control	Inf	NA	NA	NA	NA	0	oneConditionMissing	0.611111	0
O00159	O00159	Unconventional myosin-Ic	MYO1C	Long-Control	3.63994	0.382395	9.5188	4	0.000680027	0.00544602	NA	0.625	0
O00203	O00203	AP-3 complex subunit beta-1	AP3B1	Long-Control	Inf	NA	NA	NA	NA	0	oneConditionMissing	0.666667	0
O00231	O00231	26S proteasome non-ATPase regulatory subunit 11	PSMD11	Long-Control	Inf	NA	NA	NA	NA	0	oneConditionMissing	0.666667	0
O00267	O00267	Transcription elongation factor SPT5	SUPT5H	Long-Control	Inf	NA	NA	NA	NA	0	oneConditionMissing	0.5	0
O00303	O00303	Eukaryotic translation initiation factor 3 subunit F	EIF3F	Long-Control	2.8512	0.693396	4.11194	4	0.0147088	0.0311967	NA	0.666667	0
O00425;Q9NZI8	O00425	Insulin-like growth factor 2 mRNA-binding protein 3	IGF2BP3	Long-Control	1.48409	0.483073	3.07218	5	0.027715	0.0514436	NA	0.611111	0
O00541	O00541	Pescadillo homolog	PES1	Long-Control	2.01108	0.78122	2.57428	4	0.0616992	0.0944661	NA	0.533333	0
O00567	O00567	Nucleolar protein 56	NOP56	Long-Control	0.521701	0.327762	1.59171	5	0.172326	0.217211	NA	0.5	0
O00571;O15523;Q9NQI0	O00571	ATP-dependent RNA helicase DDX3X;ATP-dependent RNA helicase DDX3Y	DDX3X;DDX3Y	Long-Control	2.64081	0.617607	4.27588	6	0.00522922	0.0143143	NA	0.526667	0
O00767	O00767	Acyl-CoA desaturase	SCD	Long-Control	Inf	NA	NA	NA	NA	0	oneConditionMissing	0.666667	0
O14617	O14617	AP-3 complex subunit delta-1	AP3D1	Long-Control	Inf	NA	NA	NA	NA	0	oneConditionMissing	0.666667	0
O14646	O14646	Chromodomain-helicase-DNA-binding protein 1	CHD1	Long-Control	Inf	NA	NA	NA	NA	0	oneConditionMissing	0.5	0
O14980	O14980	Exportin-1	XPO1	Long-Control	Inf	NA	NA	NA	NA	0	oneConditionMissing	0.666667	0
O15042	O15042	U2 snRNP-associated SURP motif-containing protein	U2SURP	Long-Control	0.573272	0.726774	0.788791	3	0.487824	0.534749	NA	0.666667	0
O15226	O15226	NF-kappa-B-repressing factor	NKRF	Long-Control	1.06871	0.193969	5.5097	5	0.00269416	0.0104303	NA	0.633333	0
O15269	O15269	Serine palmitoyltransferase 1	SPTLC1	Long-Control	Inf	NA	NA	NA	NA	0	oneConditionMissing	0.666667	0
O15371	O15371	Eukaryotic translation initiation factor 3 subunit D	EIF3D	Long-Control	3.67436	0.56648	6.4863	5	0.00129905	0.00718452	NA	0.6	0
O15372	O15372	Eukaryotic translation initiation factor 3 subunit H	EIF3H	Long-Control	Inf	NA	NA	NA	NA	0	oneConditionMissing	0.666667	0
O15479	O15479	Melanoma-associated antigen B2	MAGEB2	Long-Control	2.36353	0.197378	11.9746	5	7.16273e-05	0.0019998	NA	0.5	0
O43143;Q14562;O60231	O43143	Pre-mRNA-splicing factor ATP-dependent RNA helicase DHX15	DHX15	Long-Control	1.50042	0.54821	2.73694	5	0.0409407	0.0689126	NA	0.666667	0
O43172	O43172	U4/U6 small nuclear ribonucleoprotein Prp4	PRPF4	Long-Control	Inf	NA	NA	NA	NA	0	oneConditionMissing	0.666667	0
O43242	O43242	26S proteasome non-ATPase regulatory subunit 3	PSMD3	Long-Control	4.39732	0.67394	6.5248	4	0.00284944	0.010456	NA	0.65625	0
O43390	O43390	Heterogeneous nuclear ribonucleoprotein R	HNRNPR	Long-Control	0.601734	0.666788	0.902437	2	0.462071	0.513202	NA	0.583333	0
O43395	O43395	U4/U6 small nuclear ribonucleoprotein Prp3	PRPF3	Long-Control	Inf	NA	NA	NA	NA	0	oneConditionMissing	0.666667	0
O43542	O43542	DNA repair protein XRCC3	XRCC3	Long-Control	Inf	NA	NA	NA	NA	0	oneConditionMissing	0.666667	0
O43684	O43684	Mitotic checkpoint protein BUB3	BUB3	Long-Control	Inf	NA	NA	NA	NA	0	oneConditionMissing	0.666667	0
O43707;P12814	O43707	Alpha-actinin-4	ACTN4	Long-Control	0.83327	0.28453	2.92859	6	0.0263354	0.0503882	NA	0.25	0
O43795;Q9UBC5	O43795	Unconventional myosin-Ib	MYO1B	Long-Control	Inf	NA	NA	NA	NA	0	oneConditionMissing	0.642857	0
O43837	O43837	Isocitrate dehydrogenase [NAD] subunit beta, mitochondrial	IDH3B	Long-Control	Inf	NA	NA	NA	NA	0	oneConditionMissing	0.5	0
O60264;P28370	O60264	SWI/SNF-related matrix-associated actin-dependent regulator of chromatin subfamily A member 5	SMARCA5	Long-Control	1.04853	0.470822	2.22702	5	0.0764507	0.113836	NA	0.533333	0
O60506	O60506	Heterogeneous nuclear ribonucleoprotein Q	SYNCRIP	Long-Control	-0.346206	NA	NA	0	NA	NA	NA	0.666667	0
O60684;O15131	O60684	Importin subunit alpha-7	KPNA6	Long-Control	Inf	NA	NA	NA	NA	0	oneConditionMissing	0.5	0
O60762	O60762	Dolichol-phosphate mannosyltransferase subunit 1	DPM1	Long-Control	Inf	NA	NA	NA	NA	0	oneConditionMissing	0.666667	0
O60884	O60884	DnaJ homolog subfamily A member 2	DNAJA2	Long-Control	Inf	NA	NA	NA	NA	0	oneConditionMissing	0.666667	0
O75131;Q86YQ8;Q96A23;Q9UBL6;Q8IYJ1;Q96FN4;Q9HCH3;O95741	O75131	Copine-3	CPNE3	Long-Control	1.44382	0.702337	2.05574	1	0.288225	0.341837	NA	0.666667	0
O75152;A0A1B0GTU1	O75152	Zinc finger CCCH domain-containing protein 11A	ZC3H11A	Long-Control	Inf	NA	NA	NA	NA	0	oneConditionMissing	0.833333	0
O75534	O75534	Cold shock domain-containing protein E1	CSDE1	Long-Control	0.891883	0.262244	3.40096	3	0.0424313	0.0705452	NA	0.5	0
O75607	O75607	Nucleoplasmin-3	NPM3	Long-Control	0.612425	0.590082	1.03786	2	0.408349	0.455402	NA	0.5	0
O75694	O75694	Nuclear pore complex protein Nup155	NUP155	Long-Control	Inf	NA	NA	NA	NA	0	oneConditionMissing	0.666667	0
O75821	O75821	Eukaryotic translation initiation factor 3 subunit G	EIF3G	Long-Control	Inf	NA	NA	NA	NA	0	oneConditionMissing	0.583333	0
O75943	O75943	Cell cycle checkpoint protein RAD17	RAD17	Long-Control	Inf	NA	NA	NA	NA	0	oneConditionMissing	0.833333	0
O76021	O76021	Ribosomal L1 domain-containing protein 1	RSL1D1	Long-Control	1.00404	0.55837	1.79816	5	0.13207	0.175447	NA	0.583333	0
O76094	O76094	Signal recognition particle subunit SRP72	SRP72	Long-Control	1.63896	0.999205	1.64026	3	0.199484	0.247983	NA	0.666667	0
O94776	O94776	Metastasis-associated protein MTA2	MTA2	Long-Control	Inf	NA	NA	NA	NA	0	oneConditionMissing	0.666667	0
O94832	O94832	Unconventional myosin-Id	MYO1D	Long-Control	Inf	NA	NA	NA	NA	0	oneConditionMissing	0.75	0
O94906	O94906	Pre-mRNA-processing factor 6	PRPF6	Long-Control	2.95838	0.207927	14.228	4	0.000141712	0.00274315	NA	0.666667	0
O94973	O94973	AP-2 complex subunit alpha-2	AP2A2	Long-Control	Inf	NA	NA	NA	NA	0	oneConditionMissing	0.5	0
O95299	O95299	NADH dehydrogenase [ubiquinone] 1 alpha subcomplex subunit 10, mitochondrial	NDUFA10	Long-Control	Inf	NA	NA	NA	NA	0	oneConditionMissing	0.5	0
O95373	O95373	Importin-7	IPO7	Long-Control	Inf	NA	NA	NA	NA	0	oneConditionMissing	0.666667	0
O95433	O95433	Activator of 90 kDa heat shock protein ATPase homolog 1	AHSA1	Long-Control	Inf	NA	NA	NA	NA	0	oneConditionMissing	0.833333	0
O95782	O95782	AP-2 complex subunit alpha-1	AP2A1	Long-Control	Inf	NA	NA	NA	NA	0	oneConditionMissing	0.642857	0
O95793	O95793	Double-stranded RNA-binding protein Staufen homolog 1	STAU1	Long-Control	1.0192	0.413724	2.46347	6	0.0488886	0.0774784	NA	0.62963	0
O96019	O96019	Actin-like protein 6A	ACTL6A	Long-Control	Inf	NA	NA	NA	NA	0	oneConditionMissing	0.5	0
P00338;P07864;Q6ZMR3	P00338	L-lactate dehydrogenase A chain	LDHA	Long-Control	1.19602	0.485243	2.46478	3	0.0904828	0.12974	NA	0.583333	0
P02545	P02545	Prelamin-A/C;Lamin-A/C	LMNA	Long-Control	2.06707	0.121645	16.9926	6	2.65635e-06	0.000719871	NA	0.50641	0
P04075	P04075	Fructose-bisphosphate aldolase A	ALDOA	Long-Control	0.120373	0.806383	0.149275	1	0.905665	0.929679	NA	0.5	0
P04083	P04083	Annexin A1	ANXA1	Long-Control	-0.624302	1.36115	-0.458657	2	0.6915	0.730575	NA	0.333333	0
P04406	P04406	Glyceraldehyde-3-phosphate dehydrogenase	GAPDH	Long-Control	1.2672	0.253757	4.99374	5	0.0041268	0.0124263	NA	0.611111	0
P04792	P04792	Heat shock protein beta-1	HSPB1	Long-Control	2.7188	0.591229	4.59855	6	0.00369766	0.0115792	NA	0.533333	0
P04843	P04843	Dolichyl-diphosphooligosaccharide--protein glycosyltransferase subunit 1	RPN1	Long-Control	2.17517	0.441618	4.92545	5	0.00437678	0.0128925	NA	0.680556	0
P04899;P08754;P63096;P19087;A8MTJ3;P11488;P63092;P09471;Q5JWF2;P38405	P04899	Guanine nucleotide-binding protein G(i) subunit alpha-2;Guanine nucleotide-binding protein G(k) subunit alpha;Guanine nucleotide-binding protein G(i) subunit alpha-1;Guanine nucleotide-binding protein G(t) subunit alpha-2;Guanine nucleotide-binding protein G(t) subunit alpha-3;Guanine nucleotide-binding protein G(t) subunit alpha-1;Guanine nucleotide-binding protein G(s) subunit alpha isoforms sh…	GNAI2;GNAI3;GNAI1;GNAT2;GNAT3;GNAT1;GNAS;GNAO1;GNAL	Long-Control	2.52853	0.617746	4.09316	5	0.00941761	0.0221928	NA	0.166667	0
P05023;P13637	P05023	Sodium/potassium-transporting ATPase subunit alpha-1;Sodium/potassium-transporting ATPase subunit alpha-3	ATP1A1;ATP1A3	Long-Control	Inf	NA	NA	NA	NA	0	oneConditionMissing	0.666667	0
P05141;Q9H0C2	P05141	ADP/ATP translocase 2;ADP/ATP translocase 2, N-terminally processed	SLC25A5	Long-Control	Inf	NA	NA	NA	NA	0	oneConditionMissing	0.555556	0
P05198	P05198	Eukaryotic translation initiation factor 2 subunit 1	EIF2S1	Long-Control	Inf	NA	NA	NA	NA	0	oneConditionMissing	0.666667	0
P05387	P05387	60S acidic ribosomal protein P2	RPLP2	Long-Control	0.929405	0.145681	6.37973	1	0.0989825	0.140441	NA	0.666667	0
P05388;Q8NHW5	P05388	60S acidic ribosomal protein P0;60S acidic ribosomal protein P0-like	RPLP0;RPLP0P6	Long-Control	-0.0909723	0.84948	-0.107092	6	0.918207	0.938997	NA	0.5	0
P05783;Q92764;CON__H-INV:HIT000015463;CON__Q92764;CON__Q14532	P05783	Keratin, type I cytoskeletal 18	KRT18	Long-Control	4.47838	0.604419	7.40939	6	0.000310605	0.00400828	NA	0.527778	0
P06493;P50750;Q00536;Q00537;O94921;Q07002;Q00535;P11802;Q96Q40	P06493	Cyclin-dependent kinase 1	CDK1	Long-Control	Inf	NA	NA	NA	NA	0	oneConditionMissing	0.666667	0
P06576	P06576	ATP synthase subunit beta, mitochondrial	ATP5B	Long-Control	2.5655	0.530402	4.83691	6	0.00288986	0.010456	NA	0.5	0
P06702	P06702	Protein S100-A9	S100A9	Long-Control	-3.27838	NA	NA	0	NA	NA	NA	0.666667	0
P06733;P13929;P09104	P06733	Alpha-enolase	ENO1	Long-Control	1.00484	0.189926	5.29072	6	0.00184616	0.00828681	NA	0.583333	0
P06737;P11216;P11217	P06737	Glycogen phosphorylase, liver form;Glycogen phosphorylase, brain form;Glycogen phosphorylase, muscle form	PYGL;PYGB;PYGM	Long-Control	Inf	NA	NA	NA	NA	0	oneConditionMissing	0.666667	0
P06744;CON__Q3ZBD7	P06744	Glucose-6-phosphate isomerase	GPI	Long-Control	Inf	NA	NA	NA	NA	0	oneConditionMissing	0.5	0
P06748	P06748	Nucleophosmin	NPM1	Long-Control	1.07391	0.674575	1.59199	6	0.162494	0.208701	NA	0.555556	0
P07195	P07195	L-lactate dehydrogenase B chain	LDHB	Long-Control	Inf	NA	NA	NA	NA	0	oneConditionMissing	0.666667	0
P07237	P07237	Protein disulfide-isomerase	P4HB	Long-Control	0.47007	NA	NA	0	NA	NA	NA	0.666667	0
P07305	P07305	Histone H1.0;Histone H1.0, N-terminally processed	H1F0	Long-Control	#NAME?	NA	NA	NA	NA	0	oneConditionMissing	0.5	0
P07355;A6NMY6	P07355	Annexin A2;Putative annexin A2-like protein	ANXA2;ANXA2P2	Long-Control	1.62738	0.946378	1.71959	5	0.14614	0.191323	NA	0.513889	0
P07437;A6NNZ2;Q9H4B7;CON__ENSEMBL:ENSBTAP00000025008	P07437	Tubulin beta chain	TUBB	Long-Control	3.37835	0.475769	7.10083	6	0.000391824	0.00414224	NA	0.452381	0
P07814	P07814	Bifunctional glutamate/proline--tRNA ligase;Glutamate--tRNA ligase;Proline--tRNA ligase	EPRS	Long-Control	1.56034	0.389344	4.00762	6	0.00705752	0.0180433	NA	0.656863	0
P07900;Q58FG0	P07900	Heat shock protein HSP 90-alpha	HSP90AA1	Long-Control	1.13281	0.440459	2.5719	6	0.0422271	0.0705452	NA	0.541667	0
P07910;O60812;B7ZW38;B2RXH8;P0DMR1	P07910	Heterogeneous nuclear ribonucleoproteins C1/C2;Heterogeneous nuclear ribonucleoprotein C-like 1;Heterogeneous nuclear ribonucleoprotein C-like 3;Heterogeneous nuclear ribonucleoprotein C-like 2;Heterogeneous nuclear ribonucleoprotein C-like 4	HNRNPC;HNRNPCL1;HNRNPCL3;HNRNPCL2;HNRNPCL4	Long-Control	0.753943	0.572759	1.31633	6	0.23611	0.287798	NA	0.416667	0
P08195	P08195	4F2 cell-surface antigen heavy chain	SLC3A2	Long-Control	1.70797	0.435698	3.92007	4	0.0172467	0.0354079	NA	0.625	0
P08237	P08237	ATP-dependent 6-phosphofructokinase, muscle type	PFKM	Long-Control	Inf	NA	NA	NA	NA	0	oneConditionMissing	0.666667	0
P08238;Q58FF7;Q14568;Q58FF6;Q58FG1	P08238	Heat shock protein HSP 90-beta	HSP90AB1	Long-Control	2.96448	0.465523	6.36807	6	0.000704172	0.00545231	NA	0.5	0
P08621	P08621	U1 small nuclear ribonucleoprotein 70 kDa	SNRNP70	Long-Control	0.272646	0.476438	0.572259	2	0.624898	0.672013	NA	0.333333	0
P08727	P08727	Keratin, type I cytoskeletal 19	KRT19	Long-Control	Inf	NA	NA	NA	NA	0	oneConditionMissing	0.666667	0
P08865	P08865	40S ribosomal protein SA	RPSA	Long-Control	1.0865	0.609516	1.78256	5	0.134751	0.178134	NA	0.5	0
P09012	P09012	U1 small nuclear ribonucleoprotein A	SNRPA	Long-Control	-0.000736758	0.731318	-0.00100744	1	0.999359	0.999359	NA	0.5	0
P09622	P09622	Dihydrolipoyl dehydrogenase, mitochondrial	DLD	Long-Control	Inf	NA	NA	NA	NA	0	oneConditionMissing	0.666667	0
P09651;Q32P51	P09651	Heterogeneous nuclear ribonucleoprotein A1;Heterogeneous nuclear ribonucleoprotein A1, N-terminally processed	HNRNPA1	Long-Control	0.243172	0.586489	0.414624	6	0.692833	0.730575	NA	0.277778	0
P09874	P09874	Poly [ADP-ribose] polymerase 1	PARP1	Long-Control	2.30107	0.327579	7.02449	5	0.000902125	0.00660746	NA	0.58642	0
P0CG48;P0CG47;P62979;P62987	P0CG48	Polyubiquitin-C;Ubiquitin;Polyubiquitin-B;Ubiquitin;Ubiquitin-40S ribosomal protein S27a;Ubiquitin;40S ribosomal protein S27a;Ubiquitin-60S ribosomal protein L40;Ubiquitin;60S ribosomal protein L40	UBC;UBB;RPS27A;UBA52	Long-Control	5.05775	0.256262	19.7366	5	6.16689e-06	0.000835614	NA	0.545455	0
P0DMV8;P0DMV9	P0DMV8	Heat shock 70 kDa protein 1A;Heat shock 70 kDa protein 1B	HSPA1A;HSPA1B	Long-Control	3.62773	0.305169	11.8876	6	2.14442e-05	0.000968561	NA	0.607143	0
P10809	P10809	60 kDa heat shock protein, mitochondrial	HSPD1	Long-Control	1.75295	0.638836	2.74397	6	0.0335587	0.0590545	NA	0.552632	0
P11021	P11021	78 kDa glucose-regulated protein	HSPA5	Long-Control	3.93887	0.467841	8.41925	6	0.000153087	0.00276577	NA	0.511905	0
P11142;P54652	P11142	Heat shock cognate 71 kDa protein	HSPA8	Long-Control	4.24798	0.439463	9.66629	6	7.02647e-05	0.0019998	NA	0.5	0
P11166	P11166	Solute carrier family 2, facilitated glucose transporter member 1	SLC2A1	Long-Control	Inf	NA	NA	NA	NA	0	oneConditionMissing	0.666667	0
P11387;Q969P6	P11387	DNA topoisomerase 1	TOP1	Long-Control	2.207	0.460967	4.78777	6	0.00303854	0.010456	NA	0.513889	0
P11586	P11586	C-1-tetrahydrofolate synthase, cytoplasmic;Methylenetetrahydrofolate dehydrogenase;Methenyltetrahydrofolate cyclohydrolase;Formyltetrahydrofolate synthetase;C-1-tetrahydrofolate synthase, cytoplasmic, N-terminally processed	MTHFD1	Long-Control	Inf	NA	NA	NA	NA	0	oneConditionMissing	0.666667	0
P11940;Q9H361;Q4VXU2;Q13310;Q96DU9;Q5JQF8	P11940	Polyadenylate-binding protein 1	PABPC1	Long-Control	0.206051	0.370576	0.556029	5	0.602154	0.650135	NA	0.5	0
P12236;P12235	P12236	ADP/ATP translocase 3;ADP/ATP translocase 3, N-terminally processed;ADP/ATP translocase 1	SLC25A6;SLC25A4	Long-Control	Inf	NA	NA	NA	NA	0	oneConditionMissing	0.611111	0
P12268;P20839	P12268	Inosine-5-monophosphate dehydrogenase 2	IMPDH2	Long-Control	1.65812	0.260182	6.37293	4	0.00310934	0.0105122	NA	0.416667	0
P12429	P12429	Annexin A3	ANXA3	Long-Control	Inf	NA	NA	NA	NA	0	oneConditionMissing	0.833333	0
P12956	P12956	X-ray repair cross-complementing protein 6	XRCC6	Long-Control	1.97313	0.263715	7.48205	5	0.000673714	0.00544602	NA	0.636364	0
P13010	P13010	X-ray repair cross-complementing protein 5	XRCC5	Long-Control	2.5899	0.915596	2.82865	4	0.0474099	0.075577	NA	0.636364	0
P13639	P13639	Elongation factor 2	EEF2	Long-Control	2.29277	0.559106	4.10077	6	0.00635185	0.0167121	NA	0.53125	0
P13667	P13667	Protein disulfide-isomerase A4	PDIA4	Long-Control	1.83198	0.307151	5.96444	5	0.00189588	0.00828681	NA	0.5	0
P14618;P30613	P14618	Pyruvate kinase PKM	PKM	Long-Control	3.35671	0.591982	5.67029	6	0.00129475	0.00718452	NA	0.566667	0
P14625	P14625	Endoplasmin	HSP90B1	Long-Control	Inf	NA	NA	NA	NA	0	oneConditionMissing	0.666667	0
P14678;P63162	P14678	Small nuclear ribonucleoprotein-associated proteins B and B;Small nuclear ribonucleoprotein-associated protein N	SNRPB;SNRPN	Long-Control	0.365836	0.772096	0.473822	3	0.667976	0.712995	NA	0.555556	0
P14866	P14866	Heterogeneous nuclear ribonucleoprotein L	HNRNPL	Long-Control	0.608892	0.54165	1.12414	6	0.303905	0.353469	NA	0.5	0
P14868	P14868	Aspartate--tRNA ligase, cytoplasmic	DARS	Long-Control	1.59581	0.697579	2.28764	3	0.106187	0.146819	NA	0.75	0
P15311;P35241;P26038	P15311	Ezrin	EZR	Long-Control	1.6708	0.374684	4.45923	5	0.00664523	0.017151	NA	0.681818	0
P15880	P15880	40S ribosomal protein S2	RPS2	Long-Control	1.98049	0.272041	7.28012	4	0.0018917	0.00828681	NA	0.645833	0
P15924	P15924	Desmoplakin	DSP	Long-Control	#NAME?	NA	NA	NA	NA	0	oneConditionMissing	0.666667	0
P16403;P10412;P16402;Q02539;P22492	P16403	Histone H1.2;Histone H1.4;Histone H1.3	HIST1H1C;HIST1H1E;HIST1H1D	Long-Control	0.280815	0.464161	0.604996	3	0.587879	0.637261	NA	0.333333	0
P16615;O14983;Q93084	P16615	Sarcoplasmic/endoplasmic reticulum calcium ATPase 2	ATP2A2	Long-Control	Inf	NA	NA	NA	NA	0	oneConditionMissing	0.642857	0
P17066;P48741	P17066	Heat shock 70 kDa protein 6	HSPA6	Long-Control	4.25672	0.746596	5.70151	6	0.00125849	0.00718452	NA	0	0
P17812	P17812	CTP synthase 1	CTPS1	Long-Control	Inf	NA	NA	NA	NA	0	oneConditionMissing	0.666667	0
P17844	P17844	Probable ATP-dependent RNA helicase DDX5	DDX5	Long-Control	2.23191	0.586168	3.80763	6	0.00888821	0.0217819	NA	0.490741	0
P17858	P17858	ATP-dependent 6-phosphofructokinase, liver type	PFKL	Long-Control	Inf	NA	NA	NA	NA	0	oneConditionMissing	0.666667	0
P17987	P17987	T-complex protein 1 subunit alpha	TCP1	Long-Control	3.20515	0.499828	6.4125	4	0.00303891	0.010456	NA	0.62963	0
P18077	P18077	60S ribosomal protein L35a	RPL35A	Long-Control	Inf	NA	NA	NA	NA	0	oneConditionMissing	0.666667	0
P18124	P18124	60S ribosomal protein L7	RPL7	Long-Control	3.3729	0.402737	8.37495	5	0.000397411	0.00414224	NA	0.638889	0
P18583	P18583	Protein SON	SON	Long-Control	1.06121	0.154199	6.88208	4	0.00233607	0.0094489	NA	0.555556	0
P18621	P18621	60S ribosomal protein L17	RPL17	Long-Control	2.34731	0.607112	3.86635	4	0.0180495	0.036503	NA	0.642857	0
P18754	P18754	Regulator of chromosome condensation	RCC1	Long-Control	Inf	NA	NA	NA	NA	0	oneConditionMissing	0.611111	0
P19338	P19338	Nucleolin	NCL	Long-Control	0.786555	0.376029	2.09174	6	0.0814018	0.11734	NA	0.5	0
P19525	P19525	Interferon-induced, double-stranded RNA-activated protein kinase	EIF2AK2	Long-Control	3.44051	0.370827	9.27793	2	0.0114185	0.0257868	NA	0.75	0
P20073	P20073	Annexin A7	ANXA7	Long-Control	Inf	NA	NA	NA	NA	0	oneConditionMissing	0.666667	0
P20700;Q03252	P20700	Lamin-B1	LMNB1	Long-Control	Inf	NA	NA	NA	NA	0	oneConditionMissing	0.583333	0
P21333;O75369	P21333	Filamin-A	FLNA	Long-Control	1.78172	0.533999	3.33656	4	0.0289283	0.05297	NA	0.633333	0
P21796	P21796	Voltage-dependent anion-selective channel protein 1	VDAC1	Long-Control	Inf	NA	NA	NA	NA	0	oneConditionMissing	0.833333	0
P22087	P22087	rRNA 2-O-methyltransferase fibrillarin	FBL	Long-Control	1.60737	0.392242	4.0979	5	0.0093741	0.0221928	NA	0.4	0
P22102	P22102	Trifunctional purine biosynthetic protein adenosine-3;Phosphoribosylamine--glycine ligase;Phosphoribosylformylglycinamidine cyclo-ligase;Phosphoribosylglycinamide formyltransferase	GART	Long-Control	Inf	NA	NA	NA	NA	0	oneConditionMissing	0.75	0
P22234	P22234	Multifunctional protein ADE2;Phosphoribosylaminoimidazole-succinocarboxamide synthase;Phosphoribosylaminoimidazole carboxylase	PAICS	Long-Control	0.919997	0.38978	2.3603	2	0.142192	0.187059	NA	0.666667	0
P22570	P22570	NADPH:adrenodoxin oxidoreductase, mitochondrial	FDXR	Long-Control	Inf	NA	NA	NA	NA	0	oneConditionMissing	0.666667	0
P22626	P22626	Heterogeneous nuclear ribonucleoproteins A2/B1	HNRNPA2B1	Long-Control	0.549837	0.566369	0.970811	6	0.369135	0.418559	NA	0.486111	0
P22695	P22695	Cytochrome b-c1 complex subunit 2, mitochondrial	UQCRC2	Long-Control	Inf	NA	NA	NA	NA	0	oneConditionMissing	0.604167	0
P23246	P23246	Splicing factor, proline- and glutamine-rich	SFPQ	Long-Control	1.60317	0.755726	2.12136	6	0.0781367	0.114285	NA	0.472222	0
P23258;Q9NRH3	P23258	Tubulin gamma-1 chain;Tubulin gamma-2 chain	TUBG1;TUBG2	Long-Control	Inf	NA	NA	NA	NA	0	oneConditionMissing	0.5	0
P23396	P23396	40S ribosomal protein S3	RPS3	Long-Control	3.12121	0.54069	5.77264	6	0.0011801	0.00718452	NA	0.555556	0
P23528;Q9Y281	P23528	Cofilin-1	CFL1	Long-Control	1.12109	0.445618	2.51581	6	0.0455442	0.073907	NA	0.25	0
P24928	P24928	DNA-directed RNA polymerase II subunit RPB1	POLR2A	Long-Control	1.50164	0.383353	3.91713	2	0.0594226	0.0920201	NA	0.583333	0
P25205	P25205	DNA replication licensing factor MCM3	MCM3	Long-Control	Inf	NA	NA	NA	NA	0	oneConditionMissing	0.5	0
P25705	P25705	ATP synthase subunit alpha, mitochondrial	ATP5A1	Long-Control	3.8192	0.537876	7.10052	6	0.000391918	0.00414224	NA	0.555556	0
P26196	P26196	Probable ATP-dependent RNA helicase DDX6	DDX6	Long-Control	Inf	NA	NA	NA	NA	0	oneConditionMissing	0.555556	0
P26373	P26373	60S ribosomal protein L13	RPL13	Long-Control	2.05235	0.491111	4.17899	4	0.0139296	0.030443	NA	0.666667	0
P26599	P26599	Polypyrimidine tract-binding protein 1	PTBP1	Long-Control	0.865401	0.645224	1.34124	6	0.22838	0.281323	NA	0.458333	0
P26640	P26640	Valine--tRNA ligase	VARS	Long-Control	Inf	NA	NA	NA	NA	0	oneConditionMissing	0.666667	0
P26641	P26641	Elongation factor 1-gamma	EEF1G	Long-Control	2.42121	0.415701	5.8244	6	0.00112655	0.00718452	NA	0.527778	0
P27635;Q96L21	P27635	60S ribosomal protein L10	RPL10	Long-Control	2.57699	0.350861	7.34476	5	0.000734191	0.00552682	NA	0.583333	0
P27694	P27694	Replication protein A 70 kDa DNA-binding subunit;Replication protein A 70 kDa DNA-binding subunit, N-terminally processed	RPA1	Long-Control	Inf	NA	NA	NA	NA	0	oneConditionMissing	0.666667	0
P27708	P27708	CAD protein;Glutamine-dependent carbamoyl-phosphate synthase;Aspartate carbamoyltransferase;Dihydroorotase	CAD	Long-Control	2.17072	0.328333	6.61136	5	0.00119092	0.00718452	NA	0.666667	0
P27816	P27816	Microtubule-associated protein 4	MAP4	Long-Control	Inf	NA	NA	NA	NA	0	oneConditionMissing	0.703704	0
P29692	P29692	Elongation factor 1-delta	EEF1D	Long-Control	1.17536	0.428336	2.74402	2	0.111108	0.151308	NA	0.5	0
P30050	P30050	60S ribosomal protein L12	RPL12	Long-Control	0.242081	NA	NA	0	NA	NA	NA	0.666667	0
P30101	P30101	Protein disulfide-isomerase A3	PDIA3	Long-Control	Inf	NA	NA	NA	NA	0	oneConditionMissing	0.666667	0
P30876	P30876	DNA-directed RNA polymerase II subunit RPB2	POLR2B	Long-Control	Inf	NA	NA	NA	NA	0	oneConditionMissing	0.833333	0
P31153	P31153	S-adenosylmethionine synthase isoform type-2	MAT2A	Long-Control	Inf	NA	NA	NA	NA	0	oneConditionMissing	0.611111	0
P31689	P31689	DnaJ homolog subfamily A member 1	DNAJA1	Long-Control	1.63135	0.632958	2.57735	4	0.0614996	0.0944661	NA	0.555556	0
P31942	P31942	Heterogeneous nuclear ribonucleoprotein H3	HNRNPH3	Long-Control	0.510555	0.280423	1.82066	5	0.128301	0.171278	NA	0.527778	0
P31943	P31943	Heterogeneous nuclear ribonucleoprotein H;Heterogeneous nuclear ribonucleoprotein H, N-terminally processed	HNRNPH1	Long-Control	0.841989	0.736651	1.143	6	0.296588	0.346446	NA	0.416667	0
P32969	P32969	60S ribosomal protein L9	RPL9	Long-Control	Inf	NA	NA	NA	NA	0	oneConditionMissing	0.625	0
P33778;Q99880;Q93079;Q99877;Q16778;P62807;P58876;O60814;Q5QNW6;P23527;Q99879;P57053;P06899;Q8N257;Q96A08;A0A2R8Y619	P33778	Histone H2B type 1-B;Histone H2B type 1-L;Histone H2B type 1-H;Histone H2B type 1-N;Histone H2B type 2-E;Histone H2B type 1-C/E/F/G/I;Histone H2B type 1-D;Histone H2B type 1-K;Histone H2B type 2-F;Histone H2B type 1-O;Histone H2B type 1-M;Histone H2B type F-S;Histone H2B type 1-J;Histone H2B type 3-B;Histone H2B type 1-A	HIST1H2BB;HIST1H2BL;HIST1H2BH;HIST1H2BN;HIST2H2BE;HIST1H2BC;HIST1H2BD;HIST1H2BK;HIST2H2BF;HIST1H2BO;HIST1H2BM;H2BFS;HIST1H2BJ;HIST3H2BB;HIST1H2BA	Long-Control	-0.0820727	0.97888	-0.0838435	4	0.937209	0.954826	NA	0.333333	0
P33991;Q9UJA3	P33991	DNA replication licensing factor MCM4	MCM4	Long-Control	2.08362	0.501252	4.15684	4	0.0141815	0.0307454	NA	0.681818	0
P33992	P33992	DNA replication licensing factor MCM5	MCM5	Long-Control	Inf	NA	NA	NA	NA	0	oneConditionMissing	0.694444	0
P33993	P33993	DNA replication licensing factor MCM7	MCM7	Long-Control	2.9013	0.218881	13.2551	5	4.36774e-05	0.00169094	NA	0.605263	0
P35030	P35030	Trypsin-3	PRSS3	Long-Control	-1.58643	2.11521	-0.750009	5	0.487019	0.534749	NA	0.166667	0
P35232	P35232	Prohibitin	PHB	Long-Control	1.88062	0.332087	5.66303	4	0.00479368	0.0136746	NA	0.583333	0
P35251	P35251	Replication factor C subunit 1	RFC1	Long-Control	1.94961	0.476561	4.091	3	0.0264027	0.0503882	NA	0.666667	0
P35268	P35268	60S ribosomal protein L22	RPL22	Long-Control	Inf	NA	NA	NA	NA	0	oneConditionMissing	0.75	0
P35579;P35749;Q7Z406	P35579	Myosin-9	MYH9	Long-Control	Inf	NA	NA	NA	NA	0	oneConditionMissing	0.666667	0
P35637	P35637	RNA-binding protein FUS	FUS	Long-Control	-0.124382	0.671007	-0.185367	5	0.860226	0.886393	NA	0.333333	0
P35998	P35998	26S protease regulatory subunit 7	PSMC2	Long-Control	Inf	NA	NA	NA	NA	0	oneConditionMissing	0.666667	0
P36542	P36542	ATP synthase subunit gamma, mitochondrial	ATP5C1	Long-Control	3.73277	0.581581	6.41831	4	0.00302874	0.010456	NA	0.666667	0
P36578	P36578	60S ribosomal protein L4	RPL4	Long-Control	2.87786	0.368939	7.80037	6	0.00023403	0.00333801	NA	0.531746	0
P38159;Q96E39;O75526;Q8N7X1	P38159	RNA-binding motif protein, X chromosome;RNA-binding motif protein, X chromosome, N-terminally processed;RNA binding motif protein, X-linked-like-1	RBMX;RBMXL1	Long-Control	0.35198	0.294363	1.19573	3	0.317697	0.367931	NA	0.583333	0
P38646	P38646	Stress-70 protein, mitochondrial	HSPA9	Long-Control	2.27031	0.414766	5.47372	6	0.0015525	0.0074393	NA	0.512821	0
P38919	P38919	Eukaryotic initiation factor 4A-III;Eukaryotic initiation factor 4A-III, N-terminally processed	EIF4A3	Long-Control	2.55053	0.616157	4.13942	5	0.0090021	0.0217819	NA	0.616667	0
P39023;Q92901	P39023	60S ribosomal protein L3	RPL3	Long-Control	3.34912	0.274348	12.2076	6	1.83869e-05	0.000968561	NA	0.572464	0
P39656	P39656	Dolichyl-diphosphooligosaccharide--protein glycosyltransferase 48 kDa subunit	DDOST	Long-Control	Inf	NA	NA	NA	NA	0	oneConditionMissing	0.611111	0
P40227;Q92526	P40227	T-complex protein 1 subunit zeta	CCT6A	Long-Control	1.94785	0.340445	5.72148	4	0.00461819	0.0133859	NA	0.604167	0
P40429;Q6NVV1	P40429	60S ribosomal protein L13a	RPL13A	Long-Control	2.29371	0.677564	3.38523	4	0.0276514	0.0514436	NA	0.5	0
P41091;Q2VIR3	P41091	Eukaryotic translation initiation factor 2 subunit 3;Putative eukaryotic translation initiation factor 2 subunit 3-like protein	EIF2S3;EIF2S3L	Long-Control	3.84395	0.687025	5.59507	4	0.00500808	0.0139541	NA	0.555556	0
P41227	P41227	N-alpha-acetyltransferase 10	NAA10	Long-Control	Inf	NA	NA	NA	NA	0	oneConditionMissing	0.666667	0
P41252	P41252	Isoleucine--tRNA ligase, cytoplasmic	IARS	Long-Control	Inf	NA	NA	NA	NA	0	oneConditionMissing	0.527778	0
P42212;CON__Q9U6Y5	P42212	Green fluorescent protein	GFP	Long-Control	11.9509	0.711902	16.7874	4	7.37934e-05	0.0019998	NA	0.562963	0
P42224	P42224	Signal transducer and activator of transcription 1-alpha/beta	STAT1	Long-Control	Inf	NA	NA	NA	NA	0	oneConditionMissing	0.5	0
P42285	P42285	Superkiller viralicidic activity 2-like 2	SKIV2L2	Long-Control	Inf	NA	NA	NA	NA	0	oneConditionMissing	0.5	0
P42704	P42704	Leucine-rich PPR motif-containing protein, mitochondrial	LRPPRC	Long-Control	Inf	NA	NA	NA	NA	0	oneConditionMissing	0.75	0
P43243	P43243	Matrin-3	MATR3	Long-Control	1.24171	0.455071	2.7286	6	0.0342496	0.0597923	NA	0.638889	0
P43490	P43490	Nicotinamide phosphoribosyltransferase	NAMPT	Long-Control	Inf	NA	NA	NA	NA	0	oneConditionMissing	0.583333	0
P45880	P45880	Voltage-dependent anion-selective channel protein 2	VDAC2	Long-Control	Inf	NA	NA	NA	NA	0	oneConditionMissing	0.541667	0
P46013	P46013	Antigen KI-67	MKI67	Long-Control	2.449	0.26475	9.25025	5	0.000248107	0.00336185	NA	0.62381	0
P46087	P46087	Probable 28S rRNA (cytosine(4447)-C(5))-methyltransferase	NOP2	Long-Control	1.21899	0.431107	2.82758	5	0.0367791	0.0626864	NA	0.433333	0
P46776	P46776	60S ribosomal protein L27a	RPL27A	Long-Control	Inf	NA	NA	NA	NA	0	oneConditionMissing	0.5	0
P46777	P46777	60S ribosomal protein L5	RPL5	Long-Control	1.78644	0.434681	4.10976	4	0.014735	0.0311967	NA	0.616667	0
P46778	P46778	60S ribosomal protein L21	RPL21	Long-Control	3.99092	0.426248	9.36291	6	8.41982e-05	0.00207434	NA	0.62963	0
P46779	P46779	60S ribosomal protein L28	RPL28	Long-Control	Inf	NA	NA	NA	NA	0	oneConditionMissing	0.666667	0
P46781	P46781	40S ribosomal protein S9	RPS9	Long-Control	Inf	NA	NA	NA	NA	0	oneConditionMissing	0.595238	0
P46940;Q86VI3;Q13576	P46940	Ras GTPase-activating-like protein IQGAP1	IQGAP1	Long-Control	Inf	NA	NA	NA	NA	0	oneConditionMissing	0.625	0
P47897	P47897	Glutamine--tRNA ligase	QARS	Long-Control	Inf	NA	NA	NA	NA	0	oneConditionMissing	0.5	0
P48444	P48444	Coatomer subunit delta	ARCN1	Long-Control	3.13247	0.466569	6.71384	4	0.00256223	0.0102112	NA	0.666667	0
P48729;Q8N752	P48729	Casein kinase I isoform alpha;Casein kinase I isoform alpha-like	CSNK1A1;CSNK1A1L	Long-Control	Inf	NA	NA	NA	NA	0	oneConditionMissing	0.833333	0
P48730;P49674	P48730	Casein kinase I isoform delta	CSNK1D	Long-Control	Inf	NA	NA	NA	NA	0	oneConditionMissing	0.666667	0
P49006	P49006	MARCKS-related protein	MARCKSL1	Long-Control	-0.540728	0.0565924	-9.55477	1	0.0663868	0.100507	NA	0.5	0
P49207	P49207	60S ribosomal protein L34	RPL34	Long-Control	1.18771	0.440828	2.69427	6	0.0358484	0.0614867	NA	0.433333	0
P49327	P49327	Fatty acid synthase;[Acyl-carrier-protein] S-acetyltransferase;[Acyl-carrier-protein] S-malonyltransferase;3-oxoacyl-[acyl-carrier-protein] synthase;3-oxoacyl-[acyl-carrier-protein] reductase;3-hydroxyacyl-[acyl-carrier-protein] dehydratase;Enoyl-[acyl-carrier-protein] reductase;Oleoyl-[acyl-carrier-protein] hydrolase	FASN	Long-Control	2.42407	0.317715	7.62968	5	0.000615155	0.00544602	NA	0.64	0
P49368	P49368	T-complex protein 1 subunit gamma	CCT3	Long-Control	2.0719	0.185711	11.1565	5	0.000100921	0.00216071	NA	0.516667	0
P49411	P49411	Elongation factor Tu, mitochondrial	TUFM	Long-Control	3.03731	0.447359	6.78943	5	0.00105474	0.00718452	NA	0.571429	0
P49750	P49750	YLP motif-containing protein 1	YLPM1	Long-Control	Inf	NA	NA	NA	NA	0	oneConditionMissing	0.5	0
P49841	P49841	Glycogen synthase kinase-3 beta	GSK3B	Long-Control	Inf	NA	NA	NA	NA	0	oneConditionMissing	0.666667	0
P50416	P50416	Carnitine O-palmitoyltransferase 1, liver isoform	CPT1A	Long-Control	Inf	NA	NA	NA	NA	0	oneConditionMissing	0.583333	0
P50454	P50454	Serpin H1	SERPINH1	Long-Control	3.1087	0.542502	5.73031	5	0.00226576	0.009356	NA	0.583333	0
P50570;Q9UQ16;Q05193	P50570	Dynamin-2;Dynamin-3	DNM2;DNM3	Long-Control	Inf	NA	NA	NA	NA	0	oneConditionMissing	0.666667	0
P50914	P50914	60S ribosomal protein L14	RPL14	Long-Control	2.22578	0.387447	5.74474	6	0.00121016	0.00718452	NA	0.4	0
P50990	P50990	T-complex protein 1 subunit theta	CCT8	Long-Control	0.894735	0.32593	2.74517	5	0.040542	0.068668	NA	0.416667	0
P50991	P50991	T-complex protein 1 subunit delta	CCT4	Long-Control	1.65785	0.270047	6.13912	4	0.00356912	0.0113792	NA	0.645833	0
P51114;Q06787	P51114	Fragile X mental retardation syndrome-related protein 1	FXR1	Long-Control	0.92804	0.398169	2.33077	4	0.0801842	0.116203	NA	0.416667	0
P51991	P51991	Heterogeneous nuclear ribonucleoprotein A3	HNRNPA3	Long-Control	2.19601	1.05181	2.08785	4	0.105086	0.146795	NA	0.541667	0
P52272	P52272	Heterogeneous nuclear ribonucleoprotein M	HNRNPM	Long-Control	1.86672	0.490828	3.80321	6	0.0089342	0.0217819	NA	0.482143	0
P52292	P52292	Importin subunit alpha-1	KPNA2	Long-Control	2.55513	0.530308	4.81821	4	0.00853411	0.0212178	NA	0.595238	0
P52597	P52597	Heterogeneous nuclear ribonucleoprotein F;Heterogeneous nuclear ribonucleoprotein F, N-terminally processed	HNRNPF	Long-Control	-0.319583	0.429801	-0.74356	6	0.48523	0.534749	NA	0.515152	0
P53396	P53396	ATP-citrate synthase	ACLY	Long-Control	Inf	NA	NA	NA	NA	0	oneConditionMissing	0.666667	0
P53618	P53618	Coatomer subunit beta	COPB1	Long-Control	Inf	NA	NA	NA	NA	0	oneConditionMissing	0.666667	0
P53621	P53621	Coatomer subunit alpha;Xenin;Proxenin	COPA	Long-Control	2.12668	0.331915	6.4073	4	0.00304806	0.010456	NA	0.583333	0
P53985	P53985	Monocarboxylate transporter 1	SLC16A1	Long-Control	Inf	NA	NA	NA	NA	0	oneConditionMissing	0.611111	0
P53992	P53992	Protein transport protein Sec24C	SEC24C	Long-Control	Inf	NA	NA	NA	NA	0	oneConditionMissing	0.5	0
P54136	P54136	Arginine--tRNA ligase, cytoplasmic	RARS	Long-Control	2.1182	0.305742	6.92808	4	0.00227858	0.009356	NA	0.5	0
P54886	P54886	Delta-1-pyrroline-5-carboxylate synthase;Glutamate 5-kinase;Gamma-glutamyl phosphate reductase	ALDH18A1	Long-Control	3.01393	0.481297	6.26211	4	0.00331758	0.0108321	NA	0.606061	0
P55060	P55060	Exportin-2	CSE1L	Long-Control	Inf	NA	NA	NA	NA	0	oneConditionMissing	0.666667	0
P55084	P55084	Trifunctional enzyme subunit beta, mitochondrial;3-ketoacyl-CoA thiolase	HADHB	Long-Control	Inf	NA	NA	NA	NA	0	oneConditionMissing	0.722222	0
P55795	P55795	Heterogeneous nuclear ribonucleoprotein H2	HNRNPH2	Long-Control	0.224084	0.639821	0.350228	1	0.785537	0.812521	NA	0.75	0
P55884	P55884	Eukaryotic translation initiation factor 3 subunit B	EIF3B	Long-Control	2.93121	0.308741	9.49406	5	0.000219159	0.00329956	NA	0.708333	0
P56192	P56192	Methionine--tRNA ligase, cytoplasmic	MARS	Long-Control	1.9621	0.430002	4.56299	4	0.0103154	0.0234915	NA	0.611111	0
P56537	P56537	Eukaryotic translation initiation factor 6	EIF6	Long-Control	1.47249	NA	NA	0	NA	NA	NA	0.666667	0
P57088	P57088	Transmembrane protein 33	TMEM33	Long-Control	Inf	NA	NA	NA	NA	0	oneConditionMissing	0.5	0
P57678	P57678	Gem-associated protein 4	GEMIN4	Long-Control	1.96394	0.361939	5.42617	1	0.116022	0.156428	NA	0.5	0
P60228	P60228	Eukaryotic translation initiation factor 3 subunit E	EIF3E	Long-Control	Inf	NA	NA	NA	NA	0	oneConditionMissing	0.722222	0
P60842;Q14240	P60842	Eukaryotic initiation factor 4A-I	EIF4A1	Long-Control	3.39434	0.521875	6.50411	6	0.000629096	0.00544602	NA	0.5625	0
P61247	P61247	40S ribosomal protein S3a	RPS3A	Long-Control	2.94713	0.422506	6.97537	5	0.000931737	0.00664476	NA	0.611111	0
P61254;Q9UNX3	P61254	60S ribosomal protein L26;60S ribosomal protein L26-like 1	RPL26;RPL26L1	Long-Control	3.18909	0.394655	8.08071	6	0.000192433	0.00306761	NA	0.52381	0
P61313	P61313	60S ribosomal protein L15	RPL15	Long-Control	2.23408	0.341489	6.54219	5	0.00124935	0.00718452	NA	0.452381	0
P61353	P61353	60S ribosomal protein L27	RPL27	Long-Control	0.353543	0.895083	0.394983	5	0.709143	0.744875	NA	0.366667	0
P61956;P55854;Q6EEV6	P61956	Small ubiquitin-related modifier 2;Small ubiquitin-related modifier 3;Small ubiquitin-related modifier 4	SUMO2;SUMO3;SUMO4	Long-Control	2.7928	0.323896	8.6225	1	0.073504	0.110053	NA	0.5	0
P61978	P61978	Heterogeneous nuclear ribonucleoprotein K	HNRNPK	Long-Control	0.880846	0.45685	1.92809	6	0.102115	0.144131	NA	0.464912	0
P62081	P62081	40S ribosomal protein S7	RPS7	Long-Control	Inf	NA	NA	NA	NA	0	oneConditionMissing	0.583333	0
P62241	P62241	40S ribosomal protein S8	RPS8	Long-Control	2.42502	0.530417	4.57192	6	0.00380277	0.0115792	NA	0.53125	0
P62244	P62244	40S ribosomal protein S15a	RPS15A	Long-Control	Inf	NA	NA	NA	NA	0	oneConditionMissing	0.75	0
P62249	P62249	40S ribosomal protein S16	RPS16	Long-Control	Inf	NA	NA	NA	NA	0	oneConditionMissing	0.666667	0
P62263	P62263	40S ribosomal protein S14	RPS14	Long-Control	2.30888	0.489539	4.71644	4	0.00919574	0.0220535	NA	0.694444	0
P62266	P62266	40S ribosomal protein S23	RPS23	Long-Control	3.63199	0.696207	5.21683	4	0.00644142	0.0167848	NA	0.555556	0
P62277	P62277	40S ribosomal protein S13	RPS13	Long-Control	Inf	NA	NA	NA	NA	0	oneConditionMissing	0.666667	0
P62280	P62280	40S ribosomal protein S11	RPS11	Long-Control	2.57925	0.316792	8.14178	5	0.000453894	0.00455575	NA	0.592593	0
P62424	P62424	60S ribosomal protein L7a	RPL7A	Long-Control	2.07219	0.713416	2.9046	6	0.0271711	0.0511344	NA	0.410256	0
P62495	P62495	Eukaryotic peptide chain release factor subunit 1	ETF1	Long-Control	2.93613	0.338149	8.68296	5	0.000335079	0.00410561	NA	0.166667	0
P62701;Q8TD47;P22090	P62701	40S ribosomal protein S4, X isoform	RPS4X	Long-Control	1.697	0.556035	3.05197	5	0.0283605	0.0522836	NA	0.616667	0
P62750	P62750	60S ribosomal protein L23a	RPL23A	Long-Control	2.91974	0.540228	5.40464	3	0.0124187	0.027488	NA	0.583333	0
P62753	P62753	40S ribosomal protein S6	RPS6	Long-Control	3.86942	0.290941	13.2997	6	1.11742e-05	0.000968561	NA	0.606061	0
P62826	P62826	GTP-binding nuclear protein Ran	RAN	Long-Control	3.95739	0.256916	15.4035	4	0.00010365	0.00216071	NA	0.604167	0
P62829	P62829	60S ribosomal protein L23	RPL23	Long-Control	2.77487	0.511779	5.42201	4	0.00560953	0.0150513	NA	0.611111	0
P62847	P62847	40S ribosomal protein S24	RPS24	Long-Control	2.06381	0.757395	2.72488	6	0.0344192	0.0597923	NA	0.222222	0
P62854;Q5JNZ5	P62854	40S ribosomal protein S26;Putative 40S ribosomal protein S26-like 1	RPS26;RPS26P11	Long-Control	2.21486	0.526481	4.20691	3	0.0245251	0.0481615	NA	0.333333	0
P62888	P62888	60S ribosomal protein L30	RPL30	Long-Control	1.11126	0.577351	1.92475	4	0.126577	0.169814	NA	0.583333	0
P62899	P62899	60S ribosomal protein L31	RPL31	Long-Control	1.56255	0.26215	5.9605	2	0.0270119	0.0511344	NA	0.333333	0
P62906	P62906	60S ribosomal protein L10a	RPL10A	Long-Control	1.12129	0.913547	1.2274	5	0.274304	0.327473	NA	0.5	0
P62910	P62910	60S ribosomal protein L32	RPL32	Long-Control	Inf	NA	NA	NA	NA	0	oneConditionMissing	0.833333	0
P62913	P62913	60S ribosomal protein L11	RPL11	Long-Control	2.58312	0.414957	6.22503	5	0.00156472	0.0074393	NA	0.5	0
P62917	P62917	60S ribosomal protein L8	RPL8	Long-Control	1.59068	0.664021	2.39552	6	0.053621	0.0844843	NA	0.388889	0
P63010;Q10567	P63010	AP-2 complex subunit beta;AP-1 complex subunit beta-1	AP2B1;AP1B1	Long-Control	Inf	NA	NA	NA	NA	0	oneConditionMissing	0.75	0
P63173	P63173	60S ribosomal protein L38	RPL38	Long-Control	Inf	NA	NA	NA	NA	0	oneConditionMissing	0.666667	0
P63244	P63244	Guanine nucleotide-binding protein subunit beta-2-like 1;Guanine nucleotide-binding protein subunit beta-2-like 1, N-terminally processed	GNB2L1	Long-Control	2.76151	0.817831	3.37662	5	0.0197467	0.0393482	NA	0.6	0
P63261	P63261	Actin, cytoplasmic 2;Actin, cytoplasmic 2, N-terminally processed	ACTG1	Long-Control	1.03399	0.732162	1.41225	2	0.293386	0.344188	NA	0.5	0
P67809	P67809	Nuclease-sensitive element-binding protein 1	YBX1	Long-Control	0.569588	0.51258	1.11122	4	0.328764	0.377521	NA	0.5	0
P68104;Q5VTE0	P68104	Elongation factor 1-alpha 1;Putative elongation factor 1-alpha-like 3	EEF1A1;EEF1A1P5	Long-Control	3.46337	0.64503	5.36932	5	0.00301639	0.010456	NA	0.530303	0
P68371;Q3ZCM7	P68371	Tubulin beta-4B chain	TUBB4B	Long-Control	2.49207	0.334084	7.45942	5	0.000683264	0.00544602	NA	0.416667	0
P68400;Q8NEV1	P68400	Casein kinase II subunit alpha;Casein kinase II subunit alpha 3	CSNK2A1;CSNK2A3	Long-Control	Inf	NA	NA	NA	NA	0	oneConditionMissing	0.666667	0
P68431;P84243;Q71DI3;Q16695;Q6NXT2	P68431	Histone H3.1;Histone H3.3;Histone H3.2;Histone H3.1t;Histone H3.3C	HIST1H3A;H3F3A;HIST2H3A;HIST3H3;H3F3C	Long-Control	-1.58269	NA	NA	0	NA	NA	NA	0.666667	0
P78344	P78344	Eukaryotic translation initiation factor 4 gamma 2	EIF4G2	Long-Control	Inf	NA	NA	NA	NA	0	oneConditionMissing	0.555556	0
P78371	P78371	T-complex protein 1 subunit beta	CCT2	Long-Control	0.953872	0.650766	1.46577	3	0.238964	0.289103	NA	0.833333	0
P78527	P78527	DNA-dependent protein kinase catalytic subunit	PRKDC	Long-Control	2.76513	0.36634	7.54798	4	0.0016506	0.00771231	NA	0.695652	0
P81605	P81605	Dermcidin;Survival-promoting peptide;DCD-1	DCD	Long-Control	0.410313	1.1618	0.353171	1	0.78387	0.812521	NA	0.5	0
P82650	P82650	28S ribosomal protein S22, mitochondrial	MRPS22	Long-Control	Inf	NA	NA	NA	NA	0	oneConditionMissing	0.833333	0
P82675	P82675	28S ribosomal protein S5, mitochondrial	MRPS5	Long-Control	Inf	NA	NA	NA	NA	0	oneConditionMissing	0.666667	0
P83731	P83731	60S ribosomal protein L24	RPL24	Long-Control	2.97919	0.613312	4.85755	5	0.00464309	0.0133859	NA	0.52381	0
P84098	P84098	60S ribosomal protein L19	RPL19	Long-Control	1.9124	0.247219	7.73566	4	0.00150406	0.0074393	NA	0.555556	0
P84103	P84103	Serine/arginine-rich splicing factor 3	SRSF3	Long-Control	0.381509	0.267601	1.42566	2	0.290048	0.341837	NA	0.5	0
Q00325	Q00325	Phosphate carrier protein, mitochondrial	SLC25A3	Long-Control	4.27227	0.639604	6.67956	4	0.00261156	0.010257	NA	0.555556	0
Q00341	Q00341	Vigilin	HDLBP	Long-Control	Inf	NA	NA	NA	NA	0	oneConditionMissing	0.666667	0
Q00610;P53675	Q00610	Clathrin heavy chain 1	CLTC	Long-Control	1.45679	0.335787	4.33843	5	0.0074399	0.0188431	NA	0.541667	0
Q00839	Q00839	Heterogeneous nuclear ribonucleoprotein U	HNRNPU	Long-Control	3.00716	0.576056	5.22026	6	0.0019757	0.00849863	NA	0.511905	0
Q01081;P0DN76	Q01081	Splicing factor U2AF 35 kDa subunit	U2AF1	Long-Control	#NAME?	NA	NA	NA	NA	0	oneConditionMissing	0.5	0
Q01085	Q01085	Nucleolysin TIAR	TIAL1	Long-Control	-1.15708	0.811772	-1.42537	2	0.29012	0.341837	NA	0.333333	0
Q01780	Q01780	Exosome component 10	EXOSC10	Long-Control	2.52923	0.470846	5.37168	5	0.00301062	0.010456	NA	0.574074	0
Q01813	Q01813	ATP-dependent 6-phosphofructokinase, platelet type	PFKP	Long-Control	Inf	NA	NA	NA	NA	0	oneConditionMissing	0.722222	0
Q01844	Q01844	RNA-binding protein EWS	EWSR1	Long-Control	0.231957	0.756036	0.306807	4	0.774298	0.807057	NA	0.583333	0
Q02543	Q02543	60S ribosomal protein L18a	RPL18A	Long-Control	2.13065	0.678304	3.14115	4	0.0348091	0.0600845	NA	0.611111	0
Q02878	Q02878	60S ribosomal protein L6	RPL6	Long-Control	2.45082	0.440297	5.56629	6	0.00142447	0.0074393	NA	0.611111	0
Q04637;O43432	Q04637	Eukaryotic translation initiation factor 4 gamma 1	EIF4G1	Long-Control	Inf	NA	NA	NA	NA	0	oneConditionMissing	0.666667	0
Q06210;O94808	Q06210	Glutamine--fructose-6-phosphate aminotransferase [isomerizing] 1	GFPT1	Long-Control	Inf	NA	NA	NA	NA	0	oneConditionMissing	0.666667	0
Q06830;Q13162;P32119	Q06830	Peroxiredoxin-1	PRDX1	Long-Control	0.962324	0.306466	3.14007	6	0.0200661	0.0396929	NA	0.5	0
Q07020	Q07020	60S ribosomal protein L18	RPL18	Long-Control	2.93746	0.244816	11.9986	6	2.03208e-05	0.000968561	NA	0.458333	0
Q07666;Q5VWX1	Q07666	KH domain-containing, RNA-binding, signal transduction-associated protein 1	KHDRBS1	Long-Control	0.512776	0.553911	0.925736	6	0.390299	0.440712	NA	0.380952	0
Q07955	Q07955	Serine/arginine-rich splicing factor 1	SRSF1	Long-Control	1.0229	0.861981	1.18668	3	0.320763	0.369901	NA	0.5	0
Q08211	Q08211	ATP-dependent RNA helicase A	DHX9	Long-Control	1.82611	0.6543	2.79093	6	0.0315388	0.0562304	NA	0.553763	0
Q08945	Q08945	FACT complex subunit SSRP1	SSRP1	Long-Control	Inf	NA	NA	NA	NA	0	oneConditionMissing	0.666667	0
Q10570	Q10570	Cleavage and polyadenylation specificity factor subunit 1	CPSF1	Long-Control	1.12987	0.694537	1.62679	3	0.202258	0.250283	NA	0.583333	0
Q12769	Q12769	Nuclear pore complex protein Nup160	NUP160	Long-Control	Inf	NA	NA	NA	NA	0	oneConditionMissing	0.666667	0
Q12788	Q12788	Transducin beta-like protein 3	TBL3	Long-Control	-0.0699162	0.976897	-0.0715697	3	0.947449	0.961643	NA	0.5	0
Q12834	Q12834	Cell division cycle protein 20 homolog	CDC20	Long-Control	Inf	NA	NA	NA	NA	0	oneConditionMissing	0.5	0
Q12906	Q12906	Interleukin enhancer-binding factor 3	ILF3	Long-Control	1.44999	0.61273	2.36644	4	0.0771196	0.114204	NA	0.416667	0
Q12931	Q12931	Heat shock protein 75 kDa, mitochondrial	TRAP1	Long-Control	3.70983	0.476161	7.79111	5	0.000557894	0.00539209	NA	0.619048	0
Q13045	Q13045	Protein flightless-1 homolog	FLII	Long-Control	Inf	NA	NA	NA	NA	0	oneConditionMissing	0.555556	0
Q13148	Q13148	TAR DNA-binding protein 43	TARDBP	Long-Control	-0.156958	0.489781	-0.320466	6	0.759482	0.794671	NA	0.380952	0
Q13151	Q13151	Heterogeneous nuclear ribonucleoprotein A0	HNRNPA0	Long-Control	2.36628	1.00655	2.35089	4	0.0784395	0.114285	NA	0.619048	0
Q13200	Q13200	26S proteasome non-ATPase regulatory subunit 2	PSMD2	Long-Control	Inf	NA	NA	NA	NA	0	oneConditionMissing	0.555556	0
Q13242	Q13242	Serine/arginine-rich splicing factor 9	SRSF9	Long-Control	1.11388	0.137817	8.08231	2	0.0149656	0.0314393	NA	0.611111	0
Q13247;Q08170;Q13243	Q13247	Serine/arginine-rich splicing factor 6;Serine/arginine-rich splicing factor 4	SRSF6;SRSF4	Long-Control	1.19877	0.398343	3.00939	2	0.0949534	0.135433	NA	0.5	0
Q13263	Q13263	Transcription intermediary factor 1-beta	TRIM28	Long-Control	Inf	NA	NA	NA	NA	0	oneConditionMissing	0.75	0
Q13347	Q13347	Eukaryotic translation initiation factor 3 subunit I	EIF3I	Long-Control	Inf	NA	NA	NA	NA	0	oneConditionMissing	0.722222	0
Q13435	Q13435	Splicing factor 3B subunit 2	SF3B2	Long-Control	2.08413	0.638513	3.26403	4	0.0309627	0.0555689	NA	0.5	0
Q13509	Q13509	Tubulin beta-3 chain	TUBB3	Long-Control	Inf	NA	NA	NA	NA	0	oneConditionMissing	0.666667	0
Q13573	Q13573	SNW domain-containing protein 1	SNW1	Long-Control	Inf	NA	NA	NA	NA	0	oneConditionMissing	0.833333	0
Q13595	Q13595	Transformer-2 protein homolog alpha	TRA2A	Long-Control	1.11152	NA	NA	0	NA	NA	NA	0.666667	0
Q13823	Q13823	Nucleolar GTP-binding protein 2	GNL2	Long-Control	2.12313	0.736361	2.88327	4	0.0448651	0.0734317	NA	0.766667	0
Q13885;Q9BVA1	Q13885	Tubulin beta-2A chain;Tubulin beta-2B chain	TUBB2A;TUBB2B	Long-Control	1.92436	NA	NA	0	NA	NA	NA	0.666667	0
Q14103	Q14103	Heterogeneous nuclear ribonucleoprotein D0	HNRNPD	Long-Control	Inf	NA	NA	NA	NA	0	oneConditionMissing	0.666667	0
Q14137	Q14137	Ribosome biogenesis protein BOP1	BOP1	Long-Control	1.46083	0.800663	1.82453	3	0.165571	0.209671	NA	0.5	0
Q14152	Q14152	Eukaryotic translation initiation factor 3 subunit A	EIF3A	Long-Control	2.67539	0.40059	6.67862	5	0.00113717	0.00718452	NA	0.614583	0
Q14166	Q14166	Tubulin--tyrosine ligase-like protein 12	TTLL12	Long-Control	Inf	NA	NA	NA	NA	0	oneConditionMissing	0.666667	0
Q14498	Q14498	RNA-binding protein 39	RBM39	Long-Control	#NAME?	NA	NA	NA	NA	0	oneConditionMissing	0.666667	0
Q14527	Q14527	Helicase-like transcription factor	HLTF	Long-Control	Inf	NA	NA	NA	NA	0	oneConditionMissing	0.666667	0
Q14566	Q14566	DNA replication licensing factor MCM6	MCM6	Long-Control	Inf	NA	NA	NA	NA	0	oneConditionMissing	0.555556	0
Q14669	Q14669	E3 ubiquitin-protein ligase TRIP12	TRIP12	Long-Control	Inf	NA	NA	NA	NA	0	oneConditionMissing	0.7	0
Q14684	Q14684	Ribosomal RNA processing protein 1 homolog B	RRP1B	Long-Control	Inf	NA	NA	NA	NA	0	oneConditionMissing	0.666667	0
Q14690	Q14690	Protein RRP5 homolog	PDCD11	Long-Control	0.99193	0.376076	2.63758	5	0.0461105	0.0739406	NA	0.685185	0
Q14694	Q14694	Ubiquitin carboxyl-terminal hydrolase 10	USP10	Long-Control	Inf	NA	NA	NA	NA	0	oneConditionMissing	0.722222	0
Q14697	Q14697	Neutral alpha-glucosidase AB	GANAB	Long-Control	1.32161	0.360563	3.66541	5	0.0145127	0.0311967	NA	0.6	0
Q14739	Q14739	Lamin-B receptor	LBR	Long-Control	Inf	NA	NA	NA	NA	0	oneConditionMissing	0.583333	0
Q14807	Q14807	Kinesin-like protein KIF22	KIF22	Long-Control	Inf	NA	NA	NA	NA	0	oneConditionMissing	0.738095	0
Q14839;Q8TDI0;Q12873	Q14839	Chromodomain-helicase-DNA-binding protein 4	CHD4	Long-Control	Inf	NA	NA	NA	NA	0	oneConditionMissing	0.75	0
Q14974	Q14974	Importin subunit beta-1	KPNB1	Long-Control	Inf	NA	NA	NA	NA	0	oneConditionMissing	0.666667	0
Q14980	Q14980	Nuclear mitotic apparatus protein 1	NUMA1	Long-Control	3.10584	0.737216	4.21293	6	0.00560494	0.0150513	NA	0.662162	0
Q15029	Q15029	116 kDa U5 small nuclear ribonucleoprotein component	EFTUD2	Long-Control	0.486952	0.265272	1.83567	3	0.163742	0.208814	NA	0.5	0
Q15046	Q15046	Lysine--tRNA ligase	KARS	Long-Control	0.468493	0.616106	0.76041	4	0.489365	0.534749	NA	0.666667	0
Q15084	Q15084	Protein disulfide-isomerase A6	PDIA6	Long-Control	Inf	NA	NA	NA	NA	0	oneConditionMissing	0.666667	0
Q15149;P58107;Q9UPN3	Q15149	Plectin	PLEC	Long-Control	Inf	NA	NA	NA	NA	0	oneConditionMissing	0.625	0
Q15233	Q15233	Non-POU domain-containing octamer-binding protein	NONO	Long-Control	2.41502	0.456645	5.28862	6	0.00184988	0.00828681	NA	0.50641	0
Q15269	Q15269	Periodic tryptophan protein 2 homolog	PWP2	Long-Control	Inf	NA	NA	NA	NA	0	oneConditionMissing	0.75	0
Q15365	Q15365	Poly(rC)-binding protein 1	PCBP1	Long-Control	2.16334	0.737099	2.93494	6	0.0261189	0.0503882	NA	0.25	0
Q15366;P57721	Q15366	Poly(rC)-binding protein 2;Poly(rC)-binding protein 3	PCBP2;PCBP3	Long-Control	2.07569	0.640338	3.24156	6	0.0176523	0.0359682	NA	0.666667	0
Q15393	Q15393	Splicing factor 3B subunit 3	SF3B3	Long-Control	0.939598	0.453029	2.07403	2	0.173791	0.218043	NA	0.666667	0
Q15417	Q15417	Calponin-3	CNN3	Long-Control	Inf	NA	NA	NA	NA	0	oneConditionMissing	0.666667	0
Q15555	Q15555	Microtubule-associated protein RP/EB family member 2	MAPRE2	Long-Control	Inf	NA	NA	NA	NA	0	oneConditionMissing	0.5	0
Q15637	Q15637	Splicing factor 1	SF1	Long-Control	0.386476	0.248383	1.55597	1	0.363648	0.41407	NA	0.666667	0
Q15717;Q12926;P26378	Q15717	ELAV-like protein 1	ELAVL1	Long-Control	-0.00539905	0.233295	-0.0231426	6	0.982287	0.98959	NA	0.479167	0
Q15758	Q15758	Neutral amino acid transporter B(0)	SLC1A5	Long-Control	Inf	NA	NA	NA	NA	0	oneConditionMissing	0.666667	0
Q15843	Q15843	NEDD8	NEDD8	Long-Control	1.61053	0.178532	9.02094	1	0.0702844	0.105817	NA	0.5	0
Q16629	Q16629	Serine/arginine-rich splicing factor 7	SRSF7	Long-Control	0.58159	0.393606	1.4776	3	0.236031	0.287798	NA	0.566667	0
Q16630	Q16630	Cleavage and polyadenylation specificity factor subunit 6	CPSF6	Long-Control	1.18458	0.294066	4.02827	2	0.0564575	0.0884392	NA	0.666667	0
Q16658	Q16658	Fascin	FSCN1	Long-Control	Inf	NA	NA	NA	NA	0	oneConditionMissing	0.833333	0
Q29RF7	Q29RF7	Sister chromatid cohesion protein PDS5 homolog A	PDS5A	Long-Control	Inf	NA	NA	NA	NA	0	oneConditionMissing	0.708333	0
Q3ZCQ8	Q3ZCQ8	Mitochondrial import inner membrane translocase subunit TIM50	TIMM50	Long-Control	Inf	NA	NA	NA	NA	0	oneConditionMissing	0.666667	0
Q58FF8	Q58FF8	Putative heat shock protein HSP 90-beta 2	HSP90AB2P	Long-Control	Inf	NA	NA	NA	NA	0	oneConditionMissing	0.666667	0
Q5BKZ1	Q5BKZ1	DBIRD complex subunit ZNF326	ZNF326	Long-Control	0.317785	0.350997	0.905378	5	0.406775	0.455402	NA	0.433333	0
Q5JVF3	Q5JVF3	PCI domain-containing protein 2	PCID2	Long-Control	Inf	NA	NA	NA	NA	0	oneConditionMissing	0.722222	0
Q5SSJ5	Q5SSJ5	Heterochromatin protein 1-binding protein 3	HP1BP3	Long-Control	2.33277	0.367258	6.35186	5	0.00142847	0.0074393	NA	0.533333	0
Q5T9A4	Q5T9A4	ATPase family AAA domain-containing protein 3B	ATAD3B	Long-Control	Inf	NA	NA	NA	NA	0	oneConditionMissing	0.666667	0
Q5VVJ2	Q5VVJ2	Histone H2A deubiquitinase MYSM1	MYSM1	Long-Control	Inf	NA	NA	NA	NA	0	oneConditionMissing	0.666667	0
Q68CQ4	Q68CQ4	Digestive organ expansion factor homolog	DIEXF	Long-Control	Inf	NA	NA	NA	NA	0	oneConditionMissing	0.666667	0
Q68D10	Q68D10	Protein SPT2 homolog	SPTY2D1	Long-Control	Inf	NA	NA	NA	NA	0	oneConditionMissing	0.666667	0
Q6P2Q9	Q6P2Q9	Pre-mRNA-processing-splicing factor 8	PRPF8	Long-Control	0.855699	0.482666	1.77286	4	0.150935	0.19571	NA	0.541667	0
Q6P5R6	Q6P5R6	60S ribosomal protein L22-like 1	RPL22L1	Long-Control	1.84959	0.398745	4.63854	2	0.0434689	0.0718297	NA	0.666667	0
Q6RFH5	Q6RFH5	WD repeat-containing protein 74	WDR74	Long-Control	Inf	NA	NA	NA	NA	0	oneConditionMissing	0.833333	0
Q7KZF4	Q7KZF4	Staphylococcal nuclease domain-containing protein 1	SND1	Long-Control	1.27997	0.501557	2.552	4	0.0631713	0.0961765	NA	0.555556	0
Q7KZI7	Q7KZI7	Serine/threonine-protein kinase MARK2	MARK2	Long-Control	Inf	NA	NA	NA	NA	0	oneConditionMissing	0.722222	0
Q7L014	Q7L014	Probable ATP-dependent RNA helicase DDX46	DDX46	Long-Control	0.243773	0.383622	0.63545	5	0.553075	0.601942	NA	0.5625	0
Q7L0Y3	Q7L0Y3	Mitochondrial ribonuclease P protein 1	TRMT10C	Long-Control	Inf	NA	NA	NA	NA	0	oneConditionMissing	0.666667	0
Q7L2E3	Q7L2E3	Putative ATP-dependent RNA helicase DHX30	DHX30	Long-Control	2.23952	0.355977	6.2912	4	0.0032613	0.0107782	NA	0.616667	0
Q7L2H7	Q7L2H7	Eukaryotic translation initiation factor 3 subunit M	EIF3M	Long-Control	Inf	NA	NA	NA	NA	0	oneConditionMissing	0.666667	0
Q7Z2W4	Q7Z2W4	Zinc finger CCCH-type antiviral protein 1	ZC3HAV1	Long-Control	1.09941	0.306408	3.58805	5	0.0157405	0.0328128	NA	0.6	0
Q7Z417	Q7Z417	Nuclear fragile X mental retardation-interacting protein 2	NUFIP2	Long-Control	Inf	NA	NA	NA	NA	0	oneConditionMissing	0.833333	0
Q7Z739	Q7Z739	YTH domain-containing family protein 3	YTHDF3	Long-Control	Inf	NA	NA	NA	NA	0	oneConditionMissing	0.666667	0
Q86VP6;O75155	Q86VP6	Cullin-associated NEDD8-dissociated protein 1	CAND1	Long-Control	Inf	NA	NA	NA	NA	0	oneConditionMissing	0.666667	0
Q86Y07	Q86Y07	Serine/threonine-protein kinase VRK2	VRK2	Long-Control	Inf	NA	NA	NA	NA	0	oneConditionMissing	0.833333	0
Q86YP4;Q8WXI9	Q86YP4	Transcriptional repressor p66-alpha	GATAD2A	Long-Control	Inf	NA	NA	NA	NA	0	oneConditionMissing	0.5	0
Q8IVT2	Q8IVT2	Mitotic interactor and substrate of PLK1	MISP	Long-Control	Inf	NA	NA	NA	NA	0	oneConditionMissing	0.666667	0
Q8IXT5	Q8IXT5	RNA-binding protein 12B	RBM12B	Long-Control	2.2151	0.352644	6.28141	5	0.00150235	0.0074393	NA	0.530864	0
Q8IY37	Q8IY37	Probable ATP-dependent RNA helicase DHX37	DHX37	Long-Control	Inf	NA	NA	NA	NA	0	oneConditionMissing	0.666667	0
Q8IY81	Q8IY81	pre-rRNA processing protein FTSJ3	FTSJ3	Long-Control	1.13656	0.546475	2.0798	4	0.106047	0.146819	NA	0.666667	0
Q8N163	Q8N163	Cell cycle and apoptosis regulator protein 2	CCAR2	Long-Control	Inf	NA	NA	NA	NA	0	oneConditionMissing	0.560606	0
Q8N1F7	Q8N1F7	Nuclear pore complex protein Nup93	NUP93	Long-Control	2.24934	0.588637	3.82127	4	0.0187578	0.0376546	NA	0.611111	0
Q8N5G2	Q8N5G2	Macoilin	TMEM57	Long-Control	Inf	NA	NA	NA	NA	0	oneConditionMissing	0.833333	0
Q8N7H5	Q8N7H5	RNA polymerase II-associated factor 1 homolog	PAF1	Long-Control	Inf	NA	NA	NA	NA	0	oneConditionMissing	0.666667	0
Q8NC51	Q8NC51	Plasminogen activator inhibitor 1 RNA-binding protein	SERBP1	Long-Control	-0.00677337	0.631255	-0.01073	4	0.991953	0.995627	NA	0.583333	0
Q8NCA5	Q8NCA5	Protein FAM98A	FAM98A	Long-Control	#NAME?	NA	NA	NA	NA	0	oneConditionMissing	0.5	0
Q8NDV3	Q8NDV3	Structural maintenance of chromosomes protein 1B	SMC1B	Long-Control	Inf	NA	NA	NA	NA	0	oneConditionMissing	0.833333	0
Q8NE71	Q8NE71	ATP-binding cassette sub-family F member 1	ABCF1	Long-Control	Inf	NA	NA	NA	NA	0	oneConditionMissing	0.666667	0
Q8NHH1	Q8NHH1	Tubulin polyglutamylase TTLL11	TTLL11	Long-Control	Inf	NA	NA	NA	NA	0	oneConditionMissing	0.666667	0
Q8NI27	Q8NI27	THO complex subunit 2	THOC2	Long-Control	1.34897	0.511774	2.63587	4	0.05783	0.0900685	NA	0.583333	0
Q8NI36	Q8NI36	WD repeat-containing protein 36	WDR36	Long-Control	1.24341	0.815318	1.52507	2	0.266746	0.31986	NA	0.611111	0
Q8TDD1	Q8TDD1	ATP-dependent RNA helicase DDX54	DDX54	Long-Control	Inf	NA	NA	NA	NA	0	oneConditionMissing	0.75	0
Q8TDN6	Q8TDN6	Ribosome biogenesis protein BRX1 homolog	BRIX1	Long-Control	Inf	NA	NA	NA	NA	0	oneConditionMissing	0.666667	0
Q8TEQ6	Q8TEQ6	Gem-associated protein 5	GEMIN5	Long-Control	Inf	NA	NA	NA	NA	0	oneConditionMissing	0.722222	0
Q8WTT2	Q8WTT2	Nucleolar complex protein 3 homolog	NOC3L	Long-Control	Inf	NA	NA	NA	NA	0	oneConditionMissing	0.666667	0
Q8WUH6	Q8WUH6	Transmembrane protein 263	TMEM263	Long-Control	Inf	NA	NA	NA	NA	0	oneConditionMissing	0.833333	0
Q8WUM4	Q8WUM4	Programmed cell death 6-interacting protein	PDCD6IP	Long-Control	Inf	NA	NA	NA	NA	0	oneConditionMissing	0.714286	0
Q8WVM0	Q8WVM0	Dimethyladenosine transferase 1, mitochondrial	TFB1M	Long-Control	Inf	NA	NA	NA	NA	0	oneConditionMissing	0.666667	0
Q8WVX9	Q8WVX9	Fatty acyl-CoA reductase 1	FAR1	Long-Control	Inf	NA	NA	NA	NA	0	oneConditionMissing	0.666667	0
Q8WWM7	Q8WWM7	Ataxin-2-like protein	ATXN2L	Long-Control	Inf	NA	NA	NA	NA	0	oneConditionMissing	0.5	0
Q8WWY3	Q8WWY3	U4/U6 small nuclear ribonucleoprotein Prp31	PRPF31	Long-Control	Inf	NA	NA	NA	NA	0	oneConditionMissing	0.5	0
Q8WXF1	Q8WXF1	Paraspeckle component 1	PSPC1	Long-Control	Inf	NA	NA	NA	NA	0	oneConditionMissing	0.5	0
Q8WYP5	Q8WYP5	Protein ELYS	AHCTF1	Long-Control	Inf	NA	NA	NA	NA	0	oneConditionMissing	0.833333	0
Q92499	Q92499	ATP-dependent RNA helicase DDX1	DDX1	Long-Control	0.188603	0.42921	0.439419	4	0.683054	0.725912	NA	0.633333	0
Q92552	Q92552	28S ribosomal protein S27, mitochondrial	MRPS27	Long-Control	Inf	NA	NA	NA	NA	0	oneConditionMissing	0.833333	0
Q92598;P34932	Q92598	Heat shock protein 105 kDa	HSPH1	Long-Control	Inf	NA	NA	NA	NA	0	oneConditionMissing	0.666667	0
Q92621	Q92621	Nuclear pore complex protein Nup205	NUP205	Long-Control	Inf	NA	NA	NA	NA	0	oneConditionMissing	0.666667	0
Q92804	Q92804	TATA-binding protein-associated factor 2N	TAF15	Long-Control	-0.185893	0.412768	-0.450357	6	0.668269	0.712995	NA	0.333333	0
Q92841	Q92841	Probable ATP-dependent RNA helicase DDX17	DDX17	Long-Control	1.20005	0.324309	3.70032	6	0.0100846	0.0233583	NA	0.447368	0
Q92922	Q92922	SWI/SNF complex subunit SMARCC1	SMARCC1	Long-Control	Inf	NA	NA	NA	NA	0	oneConditionMissing	0.666667	0
Q92925;Q96GM5;Q6STE5	Q92925	SWI/SNF-related matrix-associated actin-dependent regulator of chromatin subfamily D member 2	SMARCD2	Long-Control	Inf	NA	NA	NA	NA	0	oneConditionMissing	0.75	0
Q92945	Q92945	Far upstream element-binding protein 2	KHSRP	Long-Control	-1.1562	0.611123	-1.89193	6	0.107365	0.147694	NA	0.28125	0
Q93009	Q93009	Ubiquitin carboxyl-terminal hydrolase 7	USP7	Long-Control	Inf	NA	NA	NA	NA	0	oneConditionMissing	0.583333	0
Q969S3	Q969S3	Zinc finger protein 622	ZNF622	Long-Control	Inf	NA	NA	NA	NA	0	oneConditionMissing	0.75	0
Q969V3	Q969V3	Nicalin	NCLN	Long-Control	Inf	NA	NA	NA	NA	0	oneConditionMissing	0.611111	0
Q96CW1	Q96CW1	AP-2 complex subunit mu	AP2M1	Long-Control	3.39029	0.416307	8.14373	4	0.00123713	0.00718452	NA	0.611111	0
Q96D46	Q96D46	60S ribosomal export protein NMD3	NMD3	Long-Control	Inf	NA	NA	NA	NA	0	oneConditionMissing	0.666667	0
Q96EK5	Q96EK5	KIF1-binding protein	KIAA1279	Long-Control	Inf	NA	NA	NA	NA	0	oneConditionMissing	0.666667	0
Q96EY1	Q96EY1	DnaJ homolog subfamily A member 3, mitochondrial	DNAJA3	Long-Control	Inf	NA	NA	NA	NA	0	oneConditionMissing	0.666667	0
Q96GQ7	Q96GQ7	Probable ATP-dependent RNA helicase DDX27	DDX27	Long-Control	Inf	NA	NA	NA	NA	0	oneConditionMissing	0.666667	0
Q96HS1	Q96HS1	Serine/threonine-protein phosphatase PGAM5, mitochondrial	PGAM5	Long-Control	Inf	NA	NA	NA	NA	0	oneConditionMissing	0.666667	0
Q96I24	Q96I24	Far upstream element-binding protein 3	FUBP3	Long-Control	-0.916807	0.320881	-2.85716	4	0.0460614	0.0739406	NA	0.533333	0
Q96KA5	Q96KA5	Cleft lip and palate transmembrane protein 1-like protein	CLPTM1L	Long-Control	Inf	NA	NA	NA	NA	0	oneConditionMissing	0.666667	0
Q96MU7	Q96MU7	YTH domain-containing protein 1	YTHDC1	Long-Control	Inf	NA	NA	NA	NA	0	oneConditionMissing	0.666667	0
Q96P70	Q96P70	Importin-9	IPO9	Long-Control	Inf	NA	NA	NA	NA	0	oneConditionMissing	0.833333	0
Q96PK6	Q96PK6	RNA-binding protein 14	RBM14	Long-Control	1.16402	0.324866	3.58307	6	0.0116002	0.0259805	NA	0.472222	0
Q96RR1	Q96RR1	Twinkle protein, mitochondrial	PEO1	Long-Control	Inf	NA	NA	NA	NA	0	oneConditionMissing	0.666667	0
Q96T37	Q96T37	Putative RNA-binding protein 15	RBM15	Long-Control	1.99901	0.575313	3.47465	4	0.0254757	0.0496684	NA	0.571429	0
Q99575	Q99575	Ribonucleases P/MRP protein subunit POP1	POP1	Long-Control	Inf	NA	NA	NA	NA	0	oneConditionMissing	0.5	0
Q99613;B5ME19	Q99613	Eukaryotic translation initiation factor 3 subunit C;Eukaryotic translation initiation factor 3 subunit C-like protein	EIF3C;EIF3CL	Long-Control	3.04335	0.485737	6.26543	5	0.00151973	0.0074393	NA	0.547619	0
Q99623	Q99623	Prohibitin-2	PHB2	Long-Control	3.39676	0.345526	9.83069	5	0.000185525	0.00306761	NA	0.588235	0
Q99661	Q99661	Kinesin-like protein KIF2C	KIF2C	Long-Control	Inf	NA	NA	NA	NA	0	oneConditionMissing	0.5	0
Q99832	Q99832	T-complex protein 1 subunit eta	CCT7	Long-Control	Inf	NA	NA	NA	NA	0	oneConditionMissing	0.583333	0
Q99848	Q99848	Probable rRNA-processing protein EBP2	EBNA1BP2	Long-Control	#NAME?	NA	NA	NA	NA	0	oneConditionMissing	0.833333	0
Q9BQ70	Q9BQ70	Transcription factor 25	TCF25	Long-Control	2.37138	0.373155	6.35495	4	0.00314201	0.0105122	NA	0.648148	0
Q9BQE3	Q9BQE3	Tubulin alpha-1C chain	TUBA1C	Long-Control	Inf	NA	NA	NA	NA	0	oneConditionMissing	0.666667	0
Q9BQG0	Q9BQG0	Myb-binding protein 1A	MYBBP1A	Long-Control	Inf	NA	NA	NA	NA	0	oneConditionMissing	0.583333	0
Q9BTE3	Q9BTE3	Mini-chromosome maintenance complex-binding protein	MCMBP	Long-Control	Inf	NA	NA	NA	NA	0	oneConditionMissing	0.833333	0
Q9BUF5	Q9BUF5	Tubulin beta-6 chain	TUBB6	Long-Control	2.12847	0.30393	7.00315	4	0.00218844	0.00926668	NA	0.666667	0
Q9BUJ2	Q9BUJ2	Heterogeneous nuclear ribonucleoprotein U-like protein 1	HNRNPUL1	Long-Control	0.669844	0.60911	1.09971	4	0.333196	0.380996	NA	0.583333	0
Q9BVP2	Q9BVP2	Guanine nucleotide-binding protein-like 3	GNL3	Long-Control	1.71101	0.221201	7.7351	5	0.000577014	0.00539209	NA	0.533333	0
Q9BXJ9;Q6N069	Q9BXJ9	N-alpha-acetyltransferase 15, NatA auxiliary subunit	NAA15	Long-Control	Inf	NA	NA	NA	NA	0	oneConditionMissing	0.625	0
Q9BXY0	Q9BXY0	Protein MAK16 homolog	MAK16	Long-Control	Inf	NA	NA	NA	NA	0	oneConditionMissing	0.5	0
Q9BYG3	Q9BYG3	MKI67 FHA domain-interacting nucleolar phosphoprotein	NIFK	Long-Control	0.925817	0.493071	1.87766	3	0.157059	0.202681	NA	0.5	0
Q9BZE4	Q9BZE4	Nucleolar GTP-binding protein 1	GTPBP4	Long-Control	1.8434	0.384513	4.79411	5	0.00490908	0.0138579	NA	0.616667	0
Q9BZF1	Q9BZF1	Oxysterol-binding protein-related protein 8	OSBPL8	Long-Control	Inf	NA	NA	NA	NA	0	oneConditionMissing	0.666667	0
Q9BZJ0	Q9BZJ0	Crooked neck-like protein 1	CRNKL1	Long-Control	Inf	NA	NA	NA	NA	0	oneConditionMissing	0.5	0
Q9GZR7	Q9GZR7	ATP-dependent RNA helicase DDX24	DDX24	Long-Control	2.68425	0.55282	4.85555	6	0.00283562	0.010456	NA	0.598039	0
Q9H0A0	Q9H0A0	N-acetyltransferase 10	NAT10	Long-Control	2.54132	0.555364	4.57595	6	0.00378665	0.0115792	NA	0.526316	0
Q9H0D6	Q9H0D6	5-3 exoribonuclease 2	XRN2	Long-Control	1.25089	0.430412	2.90625	5	0.0335457	0.0590545	NA	0.541667	0
Q9H0S4	Q9H0S4	Probable ATP-dependent RNA helicase DDX47	DDX47	Long-Control	2.70141	0.3137	8.61145	5	0.000348446	0.00410561	NA	0.566667	0
Q9H223	Q9H223	EH domain-containing protein 4	EHD4	Long-Control	Inf	NA	NA	NA	NA	0	oneConditionMissing	0.583333	0
Q9H4L4	Q9H4L4	Sentrin-specific protease 3	SENP3	Long-Control	Inf	NA	NA	NA	NA	0	oneConditionMissing	0.75	0
Q9H6R0	Q9H6R0	Putative ATP-dependent RNA helicase DHX33	DHX33	Long-Control	1.3496	0.586027	2.30297	3	0.104703	0.146795	NA	0.666667	0
Q9H6R4	Q9H6R4	Nucleolar protein 6	NOL6	Long-Control	0.702266	0.524105	1.33993	4	0.251322	0.302703	NA	0.583333	0
Q9H7B2	Q9H7B2	Ribosome production factor 2 homolog	RPF2	Long-Control	Inf	NA	NA	NA	NA	0	oneConditionMissing	0.666667	0
Q9H9B4	Q9H9B4	Sideroflexin-1	SFXN1	Long-Control	Inf	NA	NA	NA	NA	0	oneConditionMissing	0.666667	0
Q9HCE1	Q9HCE1	Putative helicase MOV-10	MOV10	Long-Control	0.93114	0.110582	8.42036	3	0.00351443	0.0113382	NA	0.333333	0
Q9NQ29	Q9NQ29	Putative RNA-binding protein Luc7-like 1	LUC7L	Long-Control	Inf	NA	NA	NA	NA	0	oneConditionMissing	0.833333	0
Q9NQ55	Q9NQ55	Suppressor of SWI4 1 homolog	PPAN	Long-Control	Inf	NA	NA	NA	NA	0	oneConditionMissing	0.583333	0
Q9NR30	Q9NR30	Nucleolar RNA helicase 2	DDX21	Long-Control	1.37921	0.38726	3.56146	5	0.0161895	0.0334913	NA	0.597222	0
Q9NRG9	Q9NRG9	Aladin	AAAS	Long-Control	Inf	NA	NA	NA	NA	0	oneConditionMissing	0.666667	0
Q9NSD9	Q9NSD9	Phenylalanine--tRNA ligase beta subunit	FARSB	Long-Control	Inf	NA	NA	NA	NA	0	oneConditionMissing	0.666667	0
Q9NUQ2	Q9NUQ2	1-acyl-sn-glycerol-3-phosphate acyltransferase epsilon	AGPAT5	Long-Control	Inf	NA	NA	NA	NA	0	oneConditionMissing	0.5	0
Q9NUQ6	Q9NUQ6	SPATS2-like protein	SPATS2L	Long-Control	2.00286	0.406557	4.92638	5	0.00437327	0.0128925	NA	0.690476	0
Q9NUU7;Q9UMR2;Q9UHL0	Q9NUU7	ATP-dependent RNA helicase DDX19A;ATP-dependent RNA helicase DDX19B	DDX19A;DDX19B	Long-Control	Inf	NA	NA	NA	NA	0	oneConditionMissing	0.5	0
Q9NVH1	Q9NVH1	DnaJ homolog subfamily C member 11	DNAJC11	Long-Control	Inf	NA	NA	NA	NA	0	oneConditionMissing	0.75	0
Q9NVI7	Q9NVI7	ATPase family AAA domain-containing protein 3A	ATAD3A	Long-Control	Inf	NA	NA	NA	NA	0	oneConditionMissing	0.666667	0
Q9NVP1	Q9NVP1	ATP-dependent RNA helicase DDX18	DDX18	Long-Control	1.25754	0.264024	4.76297	5	0.00504612	0.0139541	NA	0.569444	0
Q9NW13	Q9NW13	RNA-binding protein 28	RBM28	Long-Control	2.57079	0.562238	4.57243	4	0.010242	0.0234915	NA	0.666667	0
Q9NWH9	Q9NWH9	SAFB-like transcription modulator	SLTM	Long-Control	0.628743	0.385836	1.62956	5	0.164123	0.208814	NA	0.5	0
Q9NXE4	Q9NXE4	Sphingomyelin phosphodiesterase 4	SMPD4	Long-Control	Inf	NA	NA	NA	NA	0	oneConditionMissing	0.666667	0
Q9NY93	Q9NY93	Probable ATP-dependent RNA helicase DDX56	DDX56	Long-Control	Inf	NA	NA	NA	NA	0	oneConditionMissing	0.583333	0
Q9NYF8	Q9NYF8	Bcl-2-associated transcription factor 1	BCLAF1	Long-Control	1.00347	0.440622	2.2774	2	0.15047	0.19571	NA	0.333333	0
Q9NZM1	Q9NZM1	Myoferlin	MYOF	Long-Control	Inf	NA	NA	NA	NA	0	oneConditionMissing	0.75	0
Q9P0J1	Q9P0J1	[Pyruvate dehydrogenase [acetyl-transferring]]-phosphatase 1, mitochondrial	PDP1	Long-Control	Inf	NA	NA	NA	NA	0	oneConditionMissing	0.666667	0
Q9P0W8	Q9P0W8	Spermatogenesis-associated protein 7	SPATA7	Long-Control	1.01243	1.08871	0.929936	4	0.405044	0.455402	NA	0.333333	0
Q9P258	Q9P258	Protein RCC2	RCC2	Long-Control	1.61516	NA	NA	0	NA	NA	NA	0.666667	0
Q9P275	Q9P275	Ubiquitin carboxyl-terminal hydrolase 36	USP36	Long-Control	Inf	NA	NA	NA	NA	0	oneConditionMissing	0.666667	0
Q9P287	Q9P287	BRCA2 and CDKN1A-interacting protein	BCCIP	Long-Control	Inf	NA	NA	NA	NA	0	oneConditionMissing	0.5	0
Q9P2E9;Q8N4C6	Q9P2E9	Ribosome-binding protein 1	RRBP1	Long-Control	1.46269	0.318684	4.58979	6	0.00373186	0.0115792	NA	0.496212	0
Q9UBU9	Q9UBU9	Nuclear RNA export factor 1	NXF1	Long-Control	Inf	NA	NA	NA	NA	0	oneConditionMissing	0.666667	0
Q9UBX3	Q9UBX3	Mitochondrial dicarboxylate carrier	SLC25A10	Long-Control	Inf	NA	NA	NA	NA	0	oneConditionMissing	0.833333	0
Q9UG63	Q9UG63	ATP-binding cassette sub-family F member 2	ABCF2	Long-Control	2.24515	0.418298	5.36734	4	0.00581767	0.0154568	NA	0.614583	0
Q9UHD1	Q9UHD1	Cysteine and histidine-rich domain-containing protein 1	CHORDC1	Long-Control	Inf	NA	NA	NA	NA	0	oneConditionMissing	0.583333	0
Q9UHD8	Q9UHD8	Septin-9	40057	Long-Control	Inf	NA	NA	NA	NA	0	oneConditionMissing	0.722222	0
Q9UHX1	Q9UHX1	Poly(U)-binding-splicing factor PUF60	PUF60	Long-Control	-0.0287463	0.876351	-0.0328023	3	0.975893	0.986817	NA	0.777778	0
Q9UIF9	Q9UIF9	Bromodomain adjacent to zinc finger domain protein 2A	BAZ2A	Long-Control	1.33377	0.65177	2.04638	4	0.110142	0.15075	NA	0.583333	0
Q9UMS4	Q9UMS4	Pre-mRNA-processing factor 19	PRPF19	Long-Control	0.858803	0.553756	1.55087	4	0.195873	0.244616	NA	0.555556	0
Q9UN86	Q9UN86	Ras GTPase-activating protein-binding protein 2	G3BP2	Long-Control	#NAME?	NA	NA	NA	NA	0	oneConditionMissing	0.833333	0
Q9UNQ2	Q9UNQ2	Probable dimethyladenosine transferase	DIMT1	Long-Control	Inf	NA	NA	NA	NA	0	oneConditionMissing	0.666667	0
Q9UPP1;O75151	Q9UPP1	Histone lysine demethylase PHF8;Lysine-specific demethylase PHF2	PHF8;PHF2	Long-Control	Inf	NA	NA	NA	NA	0	oneConditionMissing	0.666667	0
Q9Y230	Q9Y230	RuvB-like 2	RUVBL2	Long-Control	0.422004	0.0196472	21.4791	1	0.0296176	0.0535092	NA	0.5	0
Q9Y262	Q9Y262	Eukaryotic translation initiation factor 3 subunit L	EIF3L	Long-Control	Inf	NA	NA	NA	NA	0	oneConditionMissing	0.583333	0
Q9Y265	Q9Y265	RuvB-like 1	RUVBL1	Long-Control	1.49972	0.13807	10.862	2	0.00836956	0.0210014	NA	0.5	0
Q9Y285	Q9Y285	Phenylalanine--tRNA ligase alpha subunit	FARSA	Long-Control	2.50437	0.537739	4.65722	4	0.00960949	0.0224498	NA	0.555556	0
Q9Y2L1	Q9Y2L1	Exosome complex exonuclease RRP44	DIS3	Long-Control	Inf	NA	NA	NA	NA	0	oneConditionMissing	0.833333	0
Q9Y2R4	Q9Y2R4	Probable ATP-dependent RNA helicase DDX52	DDX52	Long-Control	1.65553	0.498662	3.31993	4	0.0293803	0.0534367	NA	0.5	0
Q9Y2W1	Q9Y2W1	Thyroid hormone receptor-associated protein 3	THRAP3	Long-Control	Inf	NA	NA	NA	NA	0	oneConditionMissing	0.833333	0
Q9Y2X3	Q9Y2X3	Nucleolar protein 58	NOP58	Long-Control	1.96985	0.683803	2.88072	4	0.0449803	0.0734317	NA	0.5	0
Q9Y305	Q9Y305	Acyl-coenzyme A thioesterase 9, mitochondrial	ACOT9	Long-Control	Inf	NA	NA	NA	NA	0	oneConditionMissing	0.5	0
Q9Y3I0	Q9Y3I0	tRNA-splicing ligase RtcB homolog	RTCB	Long-Control	1.32177	0.602826	2.19262	3	0.11597	0.156428	NA	0.625	0
Q9Y490	Q9Y490	Talin-1	TLN1	Long-Control	Inf	NA	NA	NA	NA	0	oneConditionMissing	0.666667	0
Q9Y4I1	Q9Y4I1	Unconventional myosin-Va	MYO5A	Long-Control	Inf	NA	NA	NA	NA	0	oneConditionMissing	0.833333	0
Q9Y4P3	Q9Y4P3	Transducin beta-like protein 2	TBL2	Long-Control	Inf	NA	NA	NA	NA	0	oneConditionMissing	0.666667	0
Q9Y4W2	Q9Y4W2	Ribosomal biogenesis protein LAS1L	LAS1L	Long-Control	Inf	NA	NA	NA	NA	0	oneConditionMissing	0.833333	0
Q9Y5A9	Q9Y5A9	YTH domain-containing family protein 2	YTHDF2	Long-Control	2.59197	0.335583	7.72379	4	0.00151283	0.0074393	NA	0.416667	0
Q9Y5J1	Q9Y5J1	U3 small nucleolar RNA-associated protein 18 homolog	UTP18	Long-Control	Inf	NA	NA	NA	NA	0	oneConditionMissing	0.666667	0
Q9Y678;Q9UBF2	Q9Y678	Coatomer subunit gamma-1	COPG1	Long-Control	Inf	NA	NA	NA	NA	0	oneConditionMissing	0.595238	0
Q9Y6M1	Q9Y6M1	Insulin-like growth factor 2 mRNA-binding protein 2	IGF2BP2	Long-Control	1.06999	0.417476	2.56301	1	0.236823	0.287798	NA	0.5	0
A0A0B4J1Y9;P0DTE1;A0A0C4DH36;A0A0A0MS15;A0A0B4J1V0;A0A0B4J1V6;A0A075B6Q5;A0A0B4J1X8;P0DP04;P0DP03;P0DP02;A0A0J9YX35;A0A0C4DH32;A0A0B4J1X5;A0A0B4J1V1;A0A0C4DH42;P01764;P01762;P01772;P01780;P01782;P01763;P01766;P01767;P01768	A0A0B4J1Y9	Ig heavy chain V-III region 23;Ig heavy chain V-III region TRO;Ig heavy chain V-III region KOL;Ig heavy chain V-III region JON;Ig heavy chain V-III region DOB;Ig heavy chain V-III region WEA;Ig heavy chain V-III region BRO;Ig heavy chain V-III region BUT;Ig heavy chain V-III region CAM	IGHV3-72;IGHV3-38;IGHV3-49;IGHV3-15;IGHV3-73;IGHV3-64;IGHV3-43;IGHV3-20;IGHV3-74;IGHV3-21;IGHV3-66;IGHV3-23	Short-Control	-2.03795	0.976773	-2.08641	3	0.128216	0.173732	NA	0.583333	0
A0FGR8	A0FGR8	Extended synaptotagmin-2	ESYT2	Short-Control	Inf	NA	NA	NA	NA	0	oneConditionMissing	0.916667	0
A6NHQ2	A6NHQ2	rRNA/tRNA 2-O-methyltransferase fibrillarin-like protein 1	FBLL1	Short-Control	Inf	NA	NA	NA	NA	0	oneConditionMissing	0.833333	0
A6NHR9	A6NHR9	Structural maintenance of chromosomes flexible hinge domain-containing protein 1	SMCHD1	Short-Control	1.48633	0.300022	4.95406	3	0.0157866	0.0336397	NA	0.583333	0
O00148	O00148	ATP-dependent RNA helicase DDX39A	DDX39A	Short-Control	Inf	NA	NA	NA	NA	0	oneConditionMissing	0.722222	0
O00154	O00154	Cytosolic acyl coenzyme A thioester hydrolase	ACOT7	Short-Control	Inf	NA	NA	NA	NA	0	oneConditionMissing	0.777778	0
O00159	O00159	Unconventional myosin-Ic	MYO1C	Short-Control	3.38675	0.382395	8.85668	4	0.000897492	0.00681454	NA	0.611111	0
O00203	O00203	AP-3 complex subunit beta-1	AP3B1	Short-Control	Inf	NA	NA	NA	NA	0	oneConditionMissing	0.666667	0
O00231	O00231	26S proteasome non-ATPase regulatory subunit 11	PSMD11	Short-Control	Inf	NA	NA	NA	NA	0	oneConditionMissing	0.833333	0
O00267	O00267	Transcription elongation factor SPT5	SUPT5H	Short-Control	Inf	NA	NA	NA	NA	0	oneConditionMissing	0.5	0
O00303	O00303	Eukaryotic translation initiation factor 3 subunit F	EIF3F	Short-Control	2.96838	0.693396	4.28093	4	0.0128381	0.0299925	NA	0.533333	0
O00425;Q9NZI8	O00425	Insulin-like growth factor 2 mRNA-binding protein 3	IGF2BP3	Short-Control	1.4064	0.483073	2.91136	5	0.0333468	0.0579295	NA	0.527778	0
O00541	O00541	Pescadillo homolog	PES1	Short-Control	2.20033	0.78122	2.81653	4	0.0479972	0.079799	NA	0.6	0
O00567	O00567	Nucleolar protein 56	NOP56	Short-Control	0.647058	0.327762	1.97417	5	0.105361	0.150278	NA	0.416667	0
O00571;O15523;Q9NQI0	O00571	ATP-dependent RNA helicase DDX3X;ATP-dependent RNA helicase DDX3Y	DDX3X;DDX3Y	Short-Control	2.37609	0.617607	3.84725	6	0.0084871	0.0223301	NA	0.48	0
O00767	O00767	Acyl-CoA desaturase	SCD	Short-Control	Inf	NA	NA	NA	NA	0	oneConditionMissing	0.666667	0
O14617	O14617	AP-3 complex subunit delta-1	AP3D1	Short-Control	Inf	NA	NA	NA	NA	0	oneConditionMissing	0.833333	0
O14646	O14646	Chromodomain-helicase-DNA-binding protein 1	CHD1	Short-Control	Inf	NA	NA	NA	NA	0	oneConditionMissing	0.666667	0
O14980	O14980	Exportin-1	XPO1	Short-Control	Inf	NA	NA	NA	NA	0	oneConditionMissing	0.722222	0
O15042	O15042	U2 snRNP-associated SURP motif-containing protein	U2SURP	Short-Control	0.61913	0.726774	0.851889	3	0.456879	0.507436	NA	0.583333	0
O15226	O15226	NF-kappa-B-repressing factor	NKRF	Short-Control	0.994447	0.193969	5.12684	5	0.00368586	0.0130059	NA	0.533333	0
O15269	O15269	Serine palmitoyltransferase 1	SPTLC1	Short-Control	Inf	NA	NA	NA	NA	0	oneConditionMissing	0.833333	0
O15371	O15371	Eukaryotic translation initiation factor 3 subunit D	EIF3D	Short-Control	3.49094	0.56648	6.16251	5	0.0016375	0.0085339	NA	0.583333	0
O15372	O15372	Eukaryotic translation initiation factor 3 subunit H	EIF3H	Short-Control	Inf	NA	NA	NA	NA	0	oneConditionMissing	0.833333	0
O15479	O15479	Melanoma-associated antigen B2	MAGEB2	Short-Control	2.0041	0.197378	10.1536	5	0.000158892	0.00331228	NA	0.333333	0
O43143;Q14562;O60231	O43143	Pre-mRNA-splicing factor ATP-dependent RNA helicase DHX15	DHX15	Short-Control	1.58549	0.54821	2.89212	5	0.0341022	0.0588643	NA	0.583333	0
O43172	O43172	U4/U6 small nuclear ribonucleoprotein Prp4	PRPF4	Short-Control	Inf	NA	NA	NA	NA	0	oneConditionMissing	0.75	0
O43242	O43242	26S proteasome non-ATPase regulatory subunit 3	PSMD3	Short-Control	4.09845	0.67394	6.08133	4	0.0036954	0.0130059	NA	0.59375	0
O43390	O43390	Heterogeneous nuclear ribonucleoprotein R	HNRNPR	Short-Control	0.635804	0.816645	0.778555	2	0.51773	0.568036	NA	0.583333	0
O43395	O43395	U4/U6 small nuclear ribonucleoprotein Prp3	PRPF3	Short-Control	Inf	NA	NA	NA	NA	0	oneConditionMissing	0.666667	0
O43542	O43542	DNA repair protein XRCC3	XRCC3	Short-Control	Inf	NA	NA	NA	NA	0	oneConditionMissing	0.833333	0
O43684	O43684	Mitotic checkpoint protein BUB3	BUB3	Short-Control	Inf	NA	NA	NA	NA	0	oneConditionMissing	0.75	0
O43707;P12814	O43707	Alpha-actinin-4	ACTN4	Short-Control	1.03798	0.28453	3.64806	6	0.0107312	0.0261996	NA	0.166667	0
O43795;Q9UBC5	O43795	Unconventional myosin-Ib	MYO1B	Short-Control	Inf	NA	NA	NA	NA	0	oneConditionMissing	0.678571	0
O43837	O43837	Isocitrate dehydrogenase [NAD] subunit beta, mitochondrial	IDH3B	Short-Control	Inf	NA	NA	NA	NA	0	oneConditionMissing	0.833333	0
O60264;P28370	O60264	SWI/SNF-related matrix-associated actin-dependent regulator of chromatin subfamily A member 5	SMARCA5	Short-Control	1.19075	0.470822	2.52909	5	0.052588	0.0853374	NA	0.633333	0
O60506	O60506	Heterogeneous nuclear ribonucleoprotein Q	SYNCRIP	Short-Control	-0.38214	NA	NA	0	NA	NA	NA	0.666667	0
O60684;O15131	O60684	Importin subunit alpha-7	KPNA6	Short-Control	Inf	NA	NA	NA	NA	0	oneConditionMissing	0.833333	0
O60762	O60762	Dolichol-phosphate mannosyltransferase subunit 1	DPM1	Short-Control	Inf	NA	NA	NA	NA	0	oneConditionMissing	0.833333	0
O60884	O60884	DnaJ homolog subfamily A member 2	DNAJA2	Short-Control	Inf	NA	NA	NA	NA	0	oneConditionMissing	0.833333	0
O75131;Q86YQ8;Q96A23;Q9UBL6;Q8IYJ1;Q96FN4;Q9HCH3;O95741	O75131	Copine-3	CPNE3	Short-Control	1.16457	0.810989	1.43599	1	0.387252	0.440947	NA	0.5	0
O75152;A0A1B0GTU1	O75152	Zinc finger CCCH domain-containing protein 11A	ZC3H11A	Short-Control	Inf	NA	NA	NA	NA	0	oneConditionMissing	0.666667	0
O75534	O75534	Cold shock domain-containing protein E1	CSDE1	Short-Control	0.779442	0.351838	2.21534	3	0.113534	0.158597	NA	0.166667	0
O75607	O75607	Nucleoplasmin-3	NPM3	Short-Control	1.0183	0.590082	1.72569	2	0.226545	0.282607	NA	0.5	0
O75694	O75694	Nuclear pore complex protein Nup155	NUP155	Short-Control	Inf	NA	NA	NA	NA	0	oneConditionMissing	0.666667	0
O75821	O75821	Eukaryotic translation initiation factor 3 subunit G	EIF3G	Short-Control	Inf	NA	NA	NA	NA	0	oneConditionMissing	0.666667	0
O75943	O75943	Cell cycle checkpoint protein RAD17	RAD17	Short-Control	Inf	NA	NA	NA	NA	0	oneConditionMissing	0.666667	0
O76021	O76021	Ribosomal L1 domain-containing protein 1	RSL1D1	Short-Control	1.29263	0.55837	2.31501	5	0.0684778	0.103673	NA	0.666667	0
O76094	O76094	Signal recognition particle subunit SRP72	SRP72	Short-Control	1.87475	0.999205	1.87624	3	0.157278	0.201049	NA	0.611111	0
O94776	O94776	Metastasis-associated protein MTA2	MTA2	Short-Control	Inf	NA	NA	NA	NA	0	oneConditionMissing	0.666667	0
O94832	O94832	Unconventional myosin-Id	MYO1D	Short-Control	Inf	NA	NA	NA	NA	0	oneConditionMissing	0.75	0
O94906	O94906	Pre-mRNA-processing factor 6	PRPF6	Short-Control	2.727	0.207927	13.1152	4	0.000195164	0.00352597	NA	0.648148	0
O94973	O94973	AP-2 complex subunit alpha-2	AP2A2	Short-Control	Inf	NA	NA	NA	NA	0	oneConditionMissing	0.833333	0
O95299	O95299	NADH dehydrogenase [ubiquinone] 1 alpha subcomplex subunit 10, mitochondrial	NDUFA10	Short-Control	Inf	NA	NA	NA	NA	0	oneConditionMissing	0.833333	0
O95373	O95373	Importin-7	IPO7	Short-Control	Inf	NA	NA	NA	NA	0	oneConditionMissing	0.5	0
O95433	O95433	Activator of 90 kDa heat shock protein ATPase homolog 1	AHSA1	Short-Control	Inf	NA	NA	NA	NA	0	oneConditionMissing	0.666667	0
O95782	O95782	AP-2 complex subunit alpha-1	AP2A1	Short-Control	Inf	NA	NA	NA	NA	0	oneConditionMissing	0.619048	0
O95793	O95793	Double-stranded RNA-binding protein Staufen homolog 1	STAU1	Short-Control	0.737442	0.413724	1.78245	6	0.124952	0.17102	NA	0.5	0
O96019	O96019	Actin-like protein 6A	ACTL6A	Short-Control	NA	NA	NA	NA	NA	NA	completeMissing	1	0
P00338;P07864;Q6ZMR3	P00338	L-lactate dehydrogenase A chain	LDHA	Short-Control	0.950728	0.61379	1.54895	3	0.219158	0.274962	NA	0.333333	0
P02545	P02545	Prelamin-A/C;Lamin-A/C	LMNA	Short-Control	2.27142	0.121645	18.6725	6	1.52275e-06	0.000412665	NA	0.49359	0
P04075	P04075	Fructose-bisphosphate aldolase A	ALDOA	Short-Control	#NAME?	NA	NA	NA	NA	0	oneConditionMissing	0.666667	0
P04083	P04083	Annexin A1	ANXA1	Short-Control	-0.560741	1.11138	-0.504546	2	0.663977	0.708416	NA	0.5	0
P04406	P04406	Glyceraldehyde-3-phosphate dehydrogenase	GAPDH	Short-Control	0.882989	0.283709	3.1123	5	0.0264818	0.0481648	NA	0.527778	0
P04792	P04792	Heat shock protein beta-1	HSPB1	Short-Control	2.73617	0.591229	4.62792	6	0.00358548	0.0129555	NA	0.4	0
P04843	P04843	Dolichyl-diphosphooligosaccharide--protein glycosyltransferase subunit 1	RPN1	Short-Control	2.29022	0.441618	5.18597	5	0.0035078	0.0128461	NA	0.583333	0
P04899;P08754;P63096;P19087;A8MTJ3;P11488;P63092;P09471;Q5JWF2;P38405	P04899	Guanine nucleotide-binding protein G(i) subunit alpha-2;Guanine nucleotide-binding protein G(k) subunit alpha;Guanine nucleotide-binding protein G(i) subunit alpha-1;Guanine nucleotide-binding protein G(t) subunit alpha-2;Guanine nucleotide-binding protein G(t) subunit alpha-3;Guanine nucleotide-binding protein G(t) subunit alpha-1;Guanine nucleotide-binding protein G(s) subunit alpha isoforms sh…	GNAI2;GNAI3;GNAI1;GNAT2;GNAT3;GNAT1;GNAS;GNAO1;GNAL	Short-Control	2.69442	0.617746	4.36169	5	0.00727866	0.0203352	NA	0.166667	0
P05023;P13637	P05023	Sodium/potassium-transporting ATPase subunit alpha-1;Sodium/potassium-transporting ATPase subunit alpha-3	ATP1A1;ATP1A3	Short-Control	Inf	NA	NA	NA	NA	0	oneConditionMissing	0.5	0
P05141;Q9H0C2	P05141	ADP/ATP translocase 2;ADP/ATP translocase 2, N-terminally processed	SLC25A5	Short-Control	Inf	NA	NA	NA	NA	0	oneConditionMissing	0.5	0
P05198	P05198	Eukaryotic translation initiation factor 2 subunit 1	EIF2S1	Short-Control	Inf	NA	NA	NA	NA	0	oneConditionMissing	0.666667	0
P05387	P05387	60S acidic ribosomal protein P2	RPLP2	Short-Control	1.28517	0.168218	7.63991	1	0.0828571	0.121267	NA	0.5	0
P05388;Q8NHW5	P05388	60S acidic ribosomal protein P0;60S acidic ribosomal protein P0-like	RPLP0;RPLP0P6	Short-Control	-0.410928	0.84948	-0.48374	6	0.645718	0.694403	NA	0.566667	0
P05783;Q92764;CON__H-INV:HIT000015463;CON__Q92764;CON__Q14532	P05783	Keratin, type I cytoskeletal 18	KRT18	Short-Control	4.32576	0.604419	7.1569	6	0.000375402	0.00468294	NA	0.527778	0
P06493;P50750;Q00536;Q00537;O94921;Q07002;Q00535;P11802;Q96Q40	P06493	Cyclin-dependent kinase 1	CDK1	Short-Control	Inf	NA	NA	NA	NA	0	oneConditionMissing	0.833333	0
P06576	P06576	ATP synthase subunit beta, mitochondrial	ATP5B	Short-Control	2.58199	0.530402	4.86799	6	0.00280008	0.0116742	NA	0.472222	0
P06702	P06702	Protein S100-A9	S100A9	Short-Control	-1.37409	NA	NA	0	NA	NA	NA	0.666667	0
P06733;P13929;P09104	P06733	Alpha-enolase	ENO1	Short-Control	1.0988	0.189926	5.78541	6	0.00116663	0.00752754	NA	0.516667	0
P06737;P11216;P11217	P06737	Glycogen phosphorylase, liver form;Glycogen phosphorylase, brain form;Glycogen phosphorylase, muscle form	PYGL;PYGB;PYGM	Short-Control	Inf	NA	NA	NA	NA	0	oneConditionMissing	0.666667	0
P06744;CON__Q3ZBD7	P06744	Glucose-6-phosphate isomerase	GPI	Short-Control	Inf	NA	NA	NA	NA	0	oneConditionMissing	0.666667	0
P06748	P06748	Nucleophosmin	NPM1	Short-Control	0.838867	0.674575	1.24355	6	0.260049	0.317447	NA	0.62963	0
P07195	P07195	L-lactate dehydrogenase B chain	LDHB	Short-Control	Inf	NA	NA	NA	NA	0	oneConditionMissing	0.833333	0
P07237	P07237	Protein disulfide-isomerase	P4HB	Short-Control	0.584475	NA	NA	0	NA	NA	NA	0.666667	0
P07305	P07305	Histone H1.0;Histone H1.0, N-terminally processed	H1F0	Short-Control	#NAME?	NA	NA	NA	NA	0	oneConditionMissing	0.5	0
P07355;A6NMY6	P07355	Annexin A2;Putative annexin A2-like protein	ANXA2;ANXA2P2	Short-Control	1.66764	0.946378	1.76213	5	0.138343	0.18378	NA	0.486111	0
P07437;A6NNZ2;Q9H4B7;CON__ENSEMBL:ENSBTAP00000025008	P07437	Tubulin beta chain	TUBB	Short-Control	3.03366	0.475769	6.37633	6	0.000699326	0.00578386	NA	0.380952	0
P07814	P07814	Bifunctional glutamate/proline--tRNA ligase;Glutamate--tRNA ligase;Proline--tRNA ligase	EPRS	Short-Control	1.32373	0.389344	3.3999	6	0.0144978	0.0322927	NA	0.578431	0
P07900;Q58FG0	P07900	Heat shock protein HSP 90-alpha	HSP90AA1	Short-Control	1.46489	0.440459	3.32583	6	0.0158889	0.0336397	NA	0.5625	0
P07910;O60812;B7ZW38;B2RXH8;P0DMR1	P07910	Heterogeneous nuclear ribonucleoproteins C1/C2;Heterogeneous nuclear ribonucleoprotein C-like 1;Heterogeneous nuclear ribonucleoprotein C-like 3;Heterogeneous nuclear ribonucleoprotein C-like 2;Heterogeneous nuclear ribonucleoprotein C-like 4	HNRNPC;HNRNPCL1;HNRNPCL3;HNRNPCL2;HNRNPCL4	Short-Control	0.765267	0.572759	1.3361	6	0.229955	0.283573	NA	0.416667	0
P08195	P08195	4F2 cell-surface antigen heavy chain	SLC3A2	Short-Control	1.71274	0.435698	3.93103	4	0.0170882	0.0356224	NA	0.5	0
P08237	P08237	ATP-dependent 6-phosphofructokinase, muscle type	PFKM	Short-Control	Inf	NA	NA	NA	NA	0	oneConditionMissing	0.666667	0
P08238;Q58FF7;Q14568;Q58FF6;Q58FG1	P08238	Heat shock protein HSP 90-beta	HSP90AB1	Short-Control	2.887	0.465523	6.20162	6	0.0008104	0.00645937	NA	0.441176	0
P08621	P08621	U1 small nuclear ribonucleoprotein 70 kDa	SNRNP70	Short-Control	0.206081	0.38901	0.529757	2	0.649209	0.695398	NA	0.5	0
P08727	P08727	Keratin, type I cytoskeletal 19	KRT19	Short-Control	Inf	NA	NA	NA	NA	0	oneConditionMissing	0.833333	0
P08865	P08865	40S ribosomal protein SA	RPSA	Short-Control	0.672893	0.609516	1.10398	5	0.319877	0.375267	NA	0.416667	0
P09012	P09012	U1 small nuclear ribonucleoprotein A	SNRPA	Short-Control	#NAME?	NA	NA	NA	NA	0	oneConditionMissing	0.666667	0
P09622	P09622	Dihydrolipoyl dehydrogenase, mitochondrial	DLD	Short-Control	Inf	NA	NA	NA	NA	0	oneConditionMissing	0.833333	0
P09651;Q32P51	P09651	Heterogeneous nuclear ribonucleoprotein A1;Heterogeneous nuclear ribonucleoprotein A1, N-terminally processed	HNRNPA1	Short-Control	-0.126444	0.586489	-0.215595	6	0.836446	0.858624	NA	0.166667	0
P09874	P09874	Poly [ADP-ribose] polymerase 1	PARP1	Short-Control	2.27248	0.327579	6.93719	5	0.000955544	0.00681454	NA	0.574074	0
P0CG48;P0CG47;P62979;P62987	P0CG48	Polyubiquitin-C;Ubiquitin;Polyubiquitin-B;Ubiquitin;Ubiquitin-40S ribosomal protein S27a;Ubiquitin;40S ribosomal protein S27a;Ubiquitin-60S ribosomal protein L40;Ubiquitin;60S ribosomal protein L40	UBC;UBB;RPS27A;UBA52	Short-Control	4.69411	0.256262	18.3176	5	8.91639e-06	0.00101446	NA	0.545455	0
P0DMV8;P0DMV9	P0DMV8	Heat shock 70 kDa protein 1A;Heat shock 70 kDa protein 1B	HSPA1A;HSPA1B	Short-Control	3.85668	0.305169	12.6378	6	1.50385e-05	0.00101446	NA	0.541667	0
P10809	P10809	60 kDa heat shock protein, mitochondrial	HSPD1	Short-Control	1.90956	0.638836	2.98913	6	0.0243475	0.045193	NA	0.5	0
P11021	P11021	78 kDa glucose-regulated protein	HSPA5	Short-Control	4.19011	0.467841	8.95625	6	0.000108202	0.00266571	NA	0.527778	0
P11142;P54652	P11142	Heat shock cognate 71 kDa protein	HSPA8	Short-Control	4.49339	0.439463	10.2247	6	5.10188e-05	0.00182227	NA	0.518116	0
P11166	P11166	Solute carrier family 2, facilitated glucose transporter member 1	SLC2A1	Short-Control	Inf	NA	NA	NA	NA	0	oneConditionMissing	0.611111	0
P11387;Q969P6	P11387	DNA topoisomerase 1	TOP1	Short-Control	2.235	0.460967	4.8485	6	0.002856	0.0117269	NA	0.520833	0
P11586	P11586	C-1-tetrahydrofolate synthase, cytoplasmic;Methylenetetrahydrofolate dehydrogenase;Methenyltetrahydrofolate cyclohydrolase;Formyltetrahydrofolate synthetase;C-1-tetrahydrofolate synthase, cytoplasmic, N-terminally processed	MTHFD1	Short-Control	Inf	NA	NA	NA	NA	0	oneConditionMissing	0.666667	0
P11940;Q9H361;Q4VXU2;Q13310;Q96DU9;Q5JQF8	P11940	Polyadenylate-binding protein 1	PABPC1	Short-Control	0.32528	0.370576	0.877768	5	0.42024	0.470599	NA	0.611111	0
P12236;P12235	P12236	ADP/ATP translocase 3;ADP/ATP translocase 3, N-terminally processed;ADP/ATP translocase 1	SLC25A6;SLC25A4	Short-Control	Inf	NA	NA	NA	NA	0	oneConditionMissing	0.666667	0
P12268;P20839	P12268	Inosine-5-monophosphate dehydrogenase 2	IMPDH2	Short-Control	1.23571	0.285015	4.33559	4	0.0122955	0.0289747	NA	0.333333	0
P12429	P12429	Annexin A3	ANXA3	Short-Control	Inf	NA	NA	NA	NA	0	oneConditionMissing	0.666667	0
P12956	P12956	X-ray repair cross-complementing protein 6	XRCC6	Short-Control	2.01802	0.263715	7.65231	5	0.000606723	0.00578386	NA	0.606061	0
P13010	P13010	X-ray repair cross-complementing protein 5	XRCC5	Short-Control	2.33188	0.915596	2.54684	4	0.0635178	0.0972505	NA	0.621212	0
P13639	P13639	Elongation factor 2	EEF2	Short-Control	2.04113	0.559106	3.6507	6	0.0106974	0.0261996	NA	0.479167	0
P13667	P13667	Protein disulfide-isomerase A4	PDIA4	Short-Control	2.00929	0.307151	6.54172	5	0.00124976	0.00782759	NA	0.5	0
P14618;P30613	P14618	Pyruvate kinase PKM	PKM	Short-Control	3.1526	0.591982	5.3255	6	0.00178579	0.00879907	NA	0.483333	0
P14625	P14625	Endoplasmin	HSP90B1	Short-Control	Inf	NA	NA	NA	NA	0	oneConditionMissing	0.666667	0
P14678;P63162	P14678	Small nuclear ribonucleoprotein-associated proteins B and B;Small nuclear ribonucleoprotein-associated protein N	SNRPB;SNRPN	Short-Control	0.176222	0.772096	0.228239	3	0.834133	0.858624	NA	0.555556	0
P14866	P14866	Heterogeneous nuclear ribonucleoprotein L	HNRNPL	Short-Control	0.962893	0.54165	1.77771	6	0.125776	0.171282	NA	0.416667	0
P14868	P14868	Aspartate--tRNA ligase, cytoplasmic	DARS	Short-Control	1.57817	0.739894	2.13297	3	0.122666	0.169605	NA	0.5	0
P15311;P35241;P26038	P15311	Ezrin	EZR	Short-Control	1.39875	0.374684	3.73316	5	0.0135268	0.0308046	NA	0.636364	0
P15880	P15880	40S ribosomal protein S2	RPS2	Short-Control	1.72651	0.272041	6.3465	4	0.00315752	0.012317	NA	0.541667	0
P15924	P15924	Desmoplakin	DSP	Short-Control	0.742992	1.36167	0.545646	1	0.682012	0.721974	NA	0.5	0
P16403;P10412;P16402;Q02539;P22492	P16403	Histone H1.2;Histone H1.4;Histone H1.3	HIST1H1C;HIST1H1E;HIST1H1D	Short-Control	-0.187447	0.366951	-0.510824	3	0.644691	0.694403	NA	0.416667	0
P16615;O14983;Q93084	P16615	Sarcoplasmic/endoplasmic reticulum calcium ATPase 2	ATP2A2	Short-Control	Inf	NA	NA	NA	NA	0	oneConditionMissing	0.714286	0
P17066;P48741	P17066	Heat shock 70 kDa protein 6	HSPA6	Short-Control	4.50276	0.746596	6.03105	6	0.000938743	0.00681454	NA	0	0
P17812	P17812	CTP synthase 1	CTPS1	Short-Control	Inf	NA	NA	NA	NA	0	oneConditionMissing	0.75	0
P17844	P17844	Probable ATP-dependent RNA helicase DDX5	DDX5	Short-Control	2.04019	0.586168	3.48055	6	0.0131336	0.0304206	NA	0.472222	0
P17858	P17858	ATP-dependent 6-phosphofructokinase, liver type	PFKL	Short-Control	Inf	NA	NA	NA	NA	0	oneConditionMissing	0.666667	0
P17987	P17987	T-complex protein 1 subunit alpha	TCP1	Short-Control	2.9804	0.499828	5.96286	4	0.00397186	0.0134547	NA	0.518519	0
P18077	P18077	60S ribosomal protein L35a	RPL35A	Short-Control	Inf	NA	NA	NA	NA	0	oneConditionMissing	0.833333	0
P18124	P18124	60S ribosomal protein L7	RPL7	Short-Control	3.23642	0.402737	8.03607	5	0.000482617	0.00522653	NA	0.652778	0
P18583	P18583	Protein SON	SON	Short-Control	0.99134	0.154199	6.42898	4	0.00301016	0.0119964	NA	0.555556	0
P18621	P18621	60S ribosomal protein L17	RPL17	Short-Control	2.52647	0.607112	4.16145	4	0.0141286	0.0319071	NA	0.571429	0
P18754	P18754	Regulator of chromosome condensation	RCC1	Short-Control	Inf	NA	NA	NA	NA	0	oneConditionMissing	0.722222	0
P19338	P19338	Nucleolin	NCL	Short-Control	1.15878	0.376029	3.08162	6	0.0216181	0.0409685	NA	0.5	0
P19525	P19525	Interferon-induced, double-stranded RNA-activated protein kinase	EIF2AK2	Short-Control	3.75166	0.370827	10.117	2	0.00962916	0.024162	NA	0.666667	0
P20073	P20073	Annexin A7	ANXA7	Short-Control	Inf	NA	NA	NA	NA	0	oneConditionMissing	0.833333	0
P20700;Q03252	P20700	Lamin-B1	LMNB1	Short-Control	Inf	NA	NA	NA	NA	0	oneConditionMissing	0.833333	0
P21333;O75369	P21333	Filamin-A	FLNA	Short-Control	1.97005	0.533999	3.68923	4	0.0210329	0.040425	NA	0.666667	0
P21796	P21796	Voltage-dependent anion-selective channel protein 1	VDAC1	Short-Control	Inf	NA	NA	NA	NA	0	oneConditionMissing	0.666667	0
P22087	P22087	rRNA 2-O-methyltransferase fibrillarin	FBL	Short-Control	1.54366	0.392242	3.93549	5	0.0110095	0.0266391	NA	0.333333	0
P22102	P22102	Trifunctional purine biosynthetic protein adenosine-3;Phosphoribosylamine--glycine ligase;Phosphoribosylformylglycinamidine cyclo-ligase;Phosphoribosylglycinamide formyltransferase	GART	Short-Control	Inf	NA	NA	NA	NA	0	oneConditionMissing	0.666667	0
P22234	P22234	Multifunctional protein ADE2;Phosphoribosylaminoimidazole-succinocarboxamide synthase;Phosphoribosylaminoimidazole carboxylase	PAICS	Short-Control	1.12619	0.477381	2.35911	2	0.142306	0.187209	NA	0.333333	0
P22570	P22570	NADPH:adrenodoxin oxidoreductase, mitochondrial	FDXR	Short-Control	Inf	NA	NA	NA	NA	0	oneConditionMissing	0.666667	0
P22626	P22626	Heterogeneous nuclear ribonucleoproteins A2/B1	HNRNPA2B1	Short-Control	0.490904	0.566369	0.866756	6	0.419383	0.470599	NA	0.527778	0
P22695	P22695	Cytochrome b-c1 complex subunit 2, mitochondrial	UQCRC2	Short-Control	Inf	NA	NA	NA	NA	0	oneConditionMissing	0.666667	0
P23246	P23246	Splicing factor, proline- and glutamine-rich	SFPQ	Short-Control	1.73713	0.755726	2.29862	6	0.061216	0.0953789	NA	0.430556	0
P23258;Q9NRH3	P23258	Tubulin gamma-1 chain;Tubulin gamma-2 chain	TUBG1;TUBG2	Short-Control	Inf	NA	NA	NA	NA	0	oneConditionMissing	0.666667	0
P23396	P23396	40S ribosomal protein S3	RPS3	Short-Control	2.97762	0.54069	5.50708	6	0.00150491	0.00838497	NA	0.518519	0
P23528;Q9Y281	P23528	Cofilin-1	CFL1	Short-Control	1.23559	0.445618	2.77275	6	0.032305	0.0564817	NA	0.333333	0
P24928	P24928	DNA-directed RNA polymerase II subunit RPB1	POLR2A	Short-Control	1.24436	0.383353	3.24599	2	0.0832312	0.121267	NA	0.583333	0
P25205	P25205	DNA replication licensing factor MCM3	MCM3	Short-Control	Inf	NA	NA	NA	NA	0	oneConditionMissing	0.666667	0
P25705	P25705	ATP synthase subunit alpha, mitochondrial	ATP5A1	Short-Control	3.64934	0.537876	6.78473	6	0.000501438	0.00522653	NA	0.506173	0
P26196	P26196	Probable ATP-dependent RNA helicase DDX6	DDX6	Short-Control	Inf	NA	NA	NA	NA	0	oneConditionMissing	0.583333	0
P26373	P26373	60S ribosomal protein L13	RPL13	Short-Control	1.90733	0.491111	3.8837	4	0.0177853	0.0365138	NA	0.597222	0
P26599	P26599	Polypyrimidine tract-binding protein 1	PTBP1	Short-Control	0.994523	0.645224	1.54136	6	0.174165	0.22159	NA	0.4375	0
P26640	P26640	Valine--tRNA ligase	VARS	Short-Control	Inf	NA	NA	NA	NA	0	oneConditionMissing	0.833333	0
P26641	P26641	Elongation factor 1-gamma	EEF1G	Short-Control	2.1292	0.415701	5.12195	6	0.00217408	0.00950283	NA	0.416667	0
P27635;Q96L21	P27635	60S ribosomal protein L10	RPL10	Short-Control	2.34156	0.350861	6.67377	5	0.00114095	0.00752754	NA	0.555556	0
P27694	P27694	Replication protein A 70 kDa DNA-binding subunit;Replication protein A 70 kDa DNA-binding subunit, N-terminally processed	RPA1	Short-Control	Inf	NA	NA	NA	NA	0	oneConditionMissing	0.666667	0
P27708	P27708	CAD protein;Glutamine-dependent carbamoyl-phosphate synthase;Aspartate carbamoyltransferase;Dihydroorotase	CAD	Short-Control	2.03032	0.328333	6.18374	5	0.00161235	0.0085339	NA	0.583333	0
P27816	P27816	Microtubule-associated protein 4	MAP4	Short-Control	Inf	NA	NA	NA	NA	0	oneConditionMissing	0.62963	0
P29692	P29692	Elongation factor 1-delta	EEF1D	Short-Control	1.17652	0.349735	3.36402	2	0.0781475	0.116362	NA	0.583333	0
P30050	P30050	60S ribosomal protein L12	RPL12	Short-Control	0.381643	NA	NA	0	NA	NA	NA	0.666667	0
P30101	P30101	Protein disulfide-isomerase A3	PDIA3	Short-Control	Inf	NA	NA	NA	NA	0	oneConditionMissing	0.666667	0
P30876	P30876	DNA-directed RNA polymerase II subunit RPB2	POLR2B	Short-Control	Inf	NA	NA	NA	NA	0	oneConditionMissing	0.666667	0
P31153	P31153	S-adenosylmethionine synthase isoform type-2	MAT2A	Short-Control	Inf	NA	NA	NA	NA	0	oneConditionMissing	0.833333	0
P31689	P31689	DnaJ homolog subfamily A member 1	DNAJA1	Short-Control	1.25649	0.632958	1.98511	4	0.118109	0.164141	NA	0.555556	0
P31942	P31942	Heterogeneous nuclear ribonucleoprotein H3	HNRNPH3	Short-Control	0.0972836	0.280423	0.346917	5	0.742778	0.780204	NA	0.555556	0
P31943	P31943	Heterogeneous nuclear ribonucleoprotein H;Heterogeneous nuclear ribonucleoprotein H, N-terminally processed	HNRNPH1	Short-Control	0.719388	0.736651	0.976565	6	0.366499	0.422644	NA	0.395833	0
P32969	P32969	60S ribosomal protein L9	RPL9	Short-Control	Inf	NA	NA	NA	NA	0	oneConditionMissing	0.708333	0
P33778;Q99880;Q93079;Q99877;Q16778;P62807;P58876;O60814;Q5QNW6;P23527;Q99879;P57053;P06899;Q8N257;Q96A08;A0A2R8Y619	P33778	Histone H2B type 1-B;Histone H2B type 1-L;Histone H2B type 1-H;Histone H2B type 1-N;Histone H2B type 2-E;Histone H2B type 1-C/E/F/G/I;Histone H2B type 1-D;Histone H2B type 1-K;Histone H2B type 2-F;Histone H2B type 1-O;Histone H2B type 1-M;Histone H2B type F-S;Histone H2B type 1-J;Histone H2B type 3-B;Histone H2B type 1-A	HIST1H2BB;HIST1H2BL;HIST1H2BH;HIST1H2BN;HIST2H2BE;HIST1H2BC;HIST1H2BD;HIST1H2BK;HIST2H2BF;HIST1H2BO;HIST1H2BM;H2BFS;HIST1H2BJ;HIST3H2BB;HIST1H2BA	Short-Control	-0.406498	0.692173	-0.587278	4	0.588567	0.638007	NA	0.583333	0
P33991;Q9UJA3	P33991	DNA replication licensing factor MCM4	MCM4	Short-Control	2.05231	0.501252	4.09437	4	0.0149216	0.0326109	NA	0.621212	0
P33992	P33992	DNA replication licensing factor MCM5	MCM5	Short-Control	Inf	NA	NA	NA	NA	0	oneConditionMissing	0.638889	0
P33993	P33993	DNA replication licensing factor MCM7	MCM7	Short-Control	2.77995	0.218881	12.7008	5	5.37941e-05	0.00182227	NA	0.535088	0
P35030	P35030	Trypsin-3	PRSS3	Short-Control	-1.62856	2.11521	-0.769928	5	0.476125	0.524512	NA	0.166667	0
P35232	P35232	Prohibitin	PHB	Short-Control	1.79928	0.363783	4.94602	4	0.00778329	0.0210927	NA	0.416667	0
P35251	P35251	Replication factor C subunit 1	RFC1	Short-Control	2.08499	0.50547	4.12486	3	0.0258357	0.0473072	NA	0.625	0
P35268	P35268	60S ribosomal protein L22	RPL22	Short-Control	Inf	NA	NA	NA	NA	0	oneConditionMissing	0.583333	0
P35579;P35749;Q7Z406	P35579	Myosin-9	MYH9	Short-Control	Inf	NA	NA	NA	NA	0	oneConditionMissing	0.666667	0
P35637	P35637	RNA-binding protein FUS	FUS	Short-Control	-0.234707	0.671007	-0.349784	5	0.740752	0.780204	NA	0.333333	0
P35998	P35998	26S protease regulatory subunit 7	PSMC2	Short-Control	Inf	NA	NA	NA	NA	0	oneConditionMissing	0.666667	0
P36542	P36542	ATP synthase subunit gamma, mitochondrial	ATP5C1	Short-Control	3.68345	0.581581	6.33351	4	0.00318152	0.012317	NA	0.611111	0
P36578	P36578	60S ribosomal protein L4	RPL4	Short-Control	2.74022	0.368939	7.42731	6	0.00030652	0.00461483	NA	0.519841	0
P38159;Q96E39;O75526;Q8N7X1	P38159	RNA-binding motif protein, X chromosome;RNA-binding motif protein, X chromosome, N-terminally processed;RNA binding motif protein, X-linked-like-1	RBMX;RBMXL1	Short-Control	-0.09251	0.294363	-0.314272	3	0.773902	0.809759	NA	0.5	0
P38646	P38646	Stress-70 protein, mitochondrial	HSPA9	Short-Control	2.93748	0.414766	7.08226	6	0.000397445	0.00468294	NA	0.519231	0
P38919	P38919	Eukaryotic initiation factor 4A-III;Eukaryotic initiation factor 4A-III, N-terminally processed	EIF4A3	Short-Control	2.49615	0.616157	4.05116	5	0.0098142	0.0244004	NA	0.533333	0
P39023;Q92901	P39023	60S ribosomal protein L3	RPL3	Short-Control	3.23534	0.274348	11.7928	6	2.24603e-05	0.00101446	NA	0.565217	0
P39656	P39656	Dolichyl-diphosphooligosaccharide--protein glycosyltransferase 48 kDa subunit	DDOST	Short-Control	Inf	NA	NA	NA	NA	0	oneConditionMissing	0.833333	0
P40227;Q92526	P40227	T-complex protein 1 subunit zeta	CCT6A	Short-Control	1.74419	0.340445	5.12326	4	0.00687055	0.0195992	NA	0.541667	0
P40429;Q6NVV1	P40429	60S ribosomal protein L13a	RPL13A	Short-Control	1.99881	0.677564	2.94999	4	0.0419698	0.0706448	NA	0.583333	0
P41091;Q2VIR3	P41091	Eukaryotic translation initiation factor 2 subunit 3;Putative eukaryotic translation initiation factor 2 subunit 3-like protein	EIF2S3;EIF2S3L	Short-Control	3.42262	0.687025	4.9818	4	0.00758763	0.0209821	NA	0.5	0
P41227	P41227	N-alpha-acetyltransferase 10	NAA10	Short-Control	Inf	NA	NA	NA	NA	0	oneConditionMissing	0.833333	0
P41252	P41252	Isoleucine--tRNA ligase, cytoplasmic	IARS	Short-Control	Inf	NA	NA	NA	NA	0	oneConditionMissing	0.805556	0
P42212;CON__Q9U6Y5	P42212	Green fluorescent protein	GFP	Short-Control	11.7062	0.711902	16.4435	4	8.00831e-05	0.00217025	NA	0.52963	0
P42224	P42224	Signal transducer and activator of transcription 1-alpha/beta	STAT1	Short-Control	Inf	NA	NA	NA	NA	0	oneConditionMissing	0.666667	0
P42285	P42285	Superkiller viralicidic activity 2-like 2	SKIV2L2	Short-Control	Inf	NA	NA	NA	NA	0	oneConditionMissing	0.666667	0
P42704	P42704	Leucine-rich PPR motif-containing protein, mitochondrial	LRPPRC	Short-Control	Inf	NA	NA	NA	NA	0	oneConditionMissing	0.666667	0
P43243	P43243	Matrin-3	MATR3	Short-Control	1.26193	0.455071	2.77305	6	0.0322921	0.0564817	NA	0.555556	0
P43490	P43490	Nicotinamide phosphoribosyltransferase	NAMPT	Short-Control	Inf	NA	NA	NA	NA	0	oneConditionMissing	0.666667	0
P45880	P45880	Voltage-dependent anion-selective channel protein 2	VDAC2	Short-Control	Inf	NA	NA	NA	NA	0	oneConditionMissing	0.583333	0
P46013	P46013	Antigen KI-67	MKI67	Short-Control	2.60977	0.26475	9.85747	5	0.000183124	0.00352597	NA	0.628571	0
P46087	P46087	Probable 28S rRNA (cytosine(4447)-C(5))-methyltransferase	NOP2	Short-Control	1.02794	0.431107	2.38442	5	0.0628205	0.0967292	NA	0.466667	0
P46776	P46776	60S ribosomal protein L27a	RPL27A	Short-Control	Inf	NA	NA	NA	NA	0	oneConditionMissing	0.583333	0
P46777	P46777	60S ribosomal protein L5	RPL5	Short-Control	1.61775	0.434681	3.72169	4	0.0204444	0.0399251	NA	0.566667	0
P46778	P46778	60S ribosomal protein L21	RPL21	Short-Control	4.08995	0.426248	9.59523	6	7.32724e-05	0.00217025	NA	0.537037	0
P46779	P46779	60S ribosomal protein L28	RPL28	Short-Control	Inf	NA	NA	NA	NA	0	oneConditionMissing	0.645833	0
P46781	P46781	40S ribosomal protein S9	RPS9	Short-Control	Inf	NA	NA	NA	NA	0	oneConditionMissing	0.619048	0
P46940;Q86VI3;Q13576	P46940	Ras GTPase-activating-like protein IQGAP1	IQGAP1	Short-Control	Inf	NA	NA	NA	NA	0	oneConditionMissing	0.708333	0
P47897	P47897	Glutamine--tRNA ligase	QARS	Short-Control	Inf	NA	NA	NA	NA	0	oneConditionMissing	0.944444	0
P48444	P48444	Coatomer subunit delta	ARCN1	Short-Control	2.91802	0.466569	6.25421	4	0.00333306	0.0124858	NA	0.555556	0
P48729;Q8N752	P48729	Casein kinase I isoform alpha;Casein kinase I isoform alpha-like	CSNK1A1;CSNK1A1L	Short-Control	Inf	NA	NA	NA	NA	0	oneConditionMissing	0.666667	0
P48730;P49674	P48730	Casein kinase I isoform delta	CSNK1D	Short-Control	Inf	NA	NA	NA	NA	0	oneConditionMissing	0.75	0
P49006	P49006	MARCKS-related protein	MARCKSL1	Short-Control	#NAME?	NA	NA	NA	NA	0	oneConditionMissing	0.666667	0
P49207	P49207	60S ribosomal protein L34	RPL34	Short-Control	1.37739	0.440828	3.12454	6	0.0204663	0.0399251	NA	0.433333	0
P49327	P49327	Fatty acid synthase;[Acyl-carrier-protein] S-acetyltransferase;[Acyl-carrier-protein] S-malonyltransferase;3-oxoacyl-[acyl-carrier-protein] synthase;3-oxoacyl-[acyl-carrier-protein] reductase;3-hydroxyacyl-[acyl-carrier-protein] dehydratase;Enoyl-[acyl-carrier-protein] reductase;Oleoyl-[acyl-carrier-protein] hydrolase	FASN	Short-Control	2.36386	0.317715	7.44018	5	0.000691513	0.00578386	NA	0.54	0
P49368	P49368	T-complex protein 1 subunit gamma	CCT3	Short-Control	1.67908	0.185711	9.04135	5	0.00027659	0.00461483	NA	0.5	0
P49411	P49411	Elongation factor Tu, mitochondrial	TUFM	Short-Control	2.90254	0.447359	6.48817	5	0.00129735	0.00782759	NA	0.547619	0
P49750	P49750	YLP motif-containing protein 1	YLPM1	Short-Control	Inf	NA	NA	NA	NA	0	oneConditionMissing	0.833333	0
P49841	P49841	Glycogen synthase kinase-3 beta	GSK3B	Short-Control	Inf	NA	NA	NA	NA	0	oneConditionMissing	0.833333	0
P50416	P50416	Carnitine O-palmitoyltransferase 1, liver isoform	CPT1A	Short-Control	Inf	NA	NA	NA	NA	0	oneConditionMissing	0.583333	0
P50454	P50454	Serpin H1	SERPINH1	Short-Control	2.69093	0.542502	4.96023	5	0.00424734	0.0138678	NA	0.55	0
P50570;Q9UQ16;Q05193	P50570	Dynamin-2;Dynamin-3	DNM2;DNM3	Short-Control	Inf	NA	NA	NA	NA	0	oneConditionMissing	0.833333	0
P50914	P50914	60S ribosomal protein L14	RPL14	Short-Control	2.12223	0.387447	5.47749	6	0.00154704	0.00838497	NA	0.333333	0
P50990	P50990	T-complex protein 1 subunit theta	CCT8	Short-Control	1.16405	0.32593	3.57146	5	0.016019	0.0336522	NA	0.416667	0
P50991	P50991	T-complex protein 1 subunit delta	CCT4	Short-Control	1.43845	0.270047	5.32668	4	0.00597861	0.0176109	NA	0.604167	0
P51114;Q06787	P51114	Fragile X mental retardation syndrome-related protein 1	FXR1	Short-Control	0.965587	0.398169	2.42507	4	0.0723653	0.10895	NA	0.333333	0
P51991	P51991	Heterogeneous nuclear ribonucleoprotein A3	HNRNPA3	Short-Control	1.80581	0.960164	1.88073	4	0.133168	0.178657	NA	0.708333	0
P52272	P52272	Heterogeneous nuclear ribonucleoprotein M	HNRNPM	Short-Control	1.91723	0.490828	3.90611	6	0.00792788	0.0212718	NA	0.529762	0
P52292	P52292	Importin subunit alpha-1	KPNA2	Short-Control	2.52625	0.530308	4.76375	4	0.00888071	0.0231411	NA	0.666667	0
P52597	P52597	Heterogeneous nuclear ribonucleoprotein F;Heterogeneous nuclear ribonucleoprotein F, N-terminally processed	HNRNPF	Short-Control	-0.45808	0.429801	-1.0658	6	0.327513	0.38257	NA	0.484848	0
P53396	P53396	ATP-citrate synthase	ACLY	Short-Control	Inf	NA	NA	NA	NA	0	oneConditionMissing	0.833333	0
P53618	P53618	Coatomer subunit beta	COPB1	Short-Control	Inf	NA	NA	NA	NA	0	oneConditionMissing	0.625	0
P53621	P53621	Coatomer subunit alpha;Xenin;Proxenin	COPA	Short-Control	2.00792	0.331915	6.04948	4	0.00376733	0.013089	NA	0.583333	0
P53985	P53985	Monocarboxylate transporter 1	SLC16A1	Short-Control	Inf	NA	NA	NA	NA	0	oneConditionMissing	0.777778	0
P53992	P53992	Protein transport protein Sec24C	SEC24C	Short-Control	Inf	NA	NA	NA	NA	0	oneConditionMissing	0.666667	0
P54136	P54136	Arginine--tRNA ligase, cytoplasmic	RARS	Short-Control	1.80067	0.305742	5.8895	4	0.00415583	0.0137345	NA	0.444444	0
P54886	P54886	Delta-1-pyrroline-5-carboxylate synthase;Glutamate 5-kinase;Gamma-glutamyl phosphate reductase	ALDH18A1	Short-Control	2.74761	0.481297	5.70875	4	0.00465571	0.0147421	NA	0.545455	0
P55060	P55060	Exportin-2	CSE1L	Short-Control	Inf	NA	NA	NA	NA	0	oneConditionMissing	0.833333	0
P55084	P55084	Trifunctional enzyme subunit beta, mitochondrial;3-ketoacyl-CoA thiolase	HADHB	Short-Control	Inf	NA	NA	NA	NA	0	oneConditionMissing	0.777778	0
P55795	P55795	Heterogeneous nuclear ribonucleoprotein H2	HNRNPH2	Short-Control	-0.268622	0.738802	-0.363591	1	0.777991	0.810906	NA	0.583333	0
P55884	P55884	Eukaryotic translation initiation factor 3 subunit B	EIF3B	Short-Control	2.66266	0.308741	8.62425	5	0.000346008	0.00468294	NA	0.708333	0
P56192	P56192	Methionine--tRNA ligase, cytoplasmic	MARS	Short-Control	2.10385	0.430002	4.89264	4	0.00808664	0.0214851	NA	0.5	0
P56537	P56537	Eukaryotic translation initiation factor 6	EIF6	Short-Control	1.09655	NA	NA	0	NA	NA	NA	0.666667	0
P57088	P57088	Transmembrane protein 33	TMEM33	Short-Control	Inf	NA	NA	NA	NA	0	oneConditionMissing	0.5	0
P57678	P57678	Gem-associated protein 4	GEMIN4	Short-Control	1.3584	0.313449	4.33372	1	0.144372	0.189009	NA	0.666667	0
P60228	P60228	Eukaryotic translation initiation factor 3 subunit E	EIF3E	Short-Control	Inf	NA	NA	NA	NA	0	oneConditionMissing	0.722222	0
P60842;Q14240	P60842	Eukaryotic initiation factor 4A-I	EIF4A1	Short-Control	3.32322	0.521875	6.36784	6	0.000704308	0.00578386	NA	0.46875	0
P61247	P61247	40S ribosomal protein S3a	RPS3A	Short-Control	2.67093	0.422506	6.32164	5	0.00145962	0.00838497	NA	0.6	0
P61254;Q9UNX3	P61254	60S ribosomal protein L26;60S ribosomal protein L26-like 1	RPL26;RPL26L1	Short-Control	2.81017	0.394655	7.12057	6	0.00038595	0.00468294	NA	0.571429	0
P61313	P61313	60S ribosomal protein L15	RPL15	Short-Control	2.00312	0.341489	5.86584	5	0.00204227	0.00925494	NA	0.547619	0
P61353	P61353	60S ribosomal protein L27	RPL27	Short-Control	0.19939	0.895083	0.222761	5	0.832535	0.858624	NA	0.333333	0
P61956;P55854;Q6EEV6	P61956	Small ubiquitin-related modifier 2;Small ubiquitin-related modifier 3;Small ubiquitin-related modifier 4	SUMO2;SUMO3;SUMO4	Short-Control	2.22484	0.280502	7.93164	1	0.0798421	0.118236	NA	0.666667	0
P61978	P61978	Heterogeneous nuclear ribonucleoprotein K	HNRNPK	Short-Control	0.8145	0.45685	1.78286	6	0.124881	0.17102	NA	0.429825	0
P62081	P62081	40S ribosomal protein S7	RPS7	Short-Control	Inf	NA	NA	NA	NA	0	oneConditionMissing	0.666667	0
P62241	P62241	40S ribosomal protein S8	RPS8	Short-Control	2.34114	0.530417	4.41377	6	0.00450105	0.0145213	NA	0.5	0
P62244	P62244	40S ribosomal protein S15a	RPS15A	Short-Control	Inf	NA	NA	NA	NA	0	oneConditionMissing	0.75	0
P62249	P62249	40S ribosomal protein S16	RPS16	Short-Control	Inf	NA	NA	NA	NA	0	oneConditionMissing	0.666667	0
P62263	P62263	40S ribosomal protein S14	RPS14	Short-Control	2.32123	0.489539	4.74166	4	0.00902614	0.0232525	NA	0.527778	0
P62266	P62266	40S ribosomal protein S23	RPS23	Short-Control	3.44886	0.696207	4.95379	4	0.00774029	0.0210927	NA	0.555556	0
P62277	P62277	40S ribosomal protein S13	RPS13	Short-Control	Inf	NA	NA	NA	NA	0	oneConditionMissing	0.833333	0
P62280	P62280	40S ribosomal protein S11	RPS11	Short-Control	2.3941	0.316792	7.55734	5	0.000643061	0.00578386	NA	0.518519	0
P62424	P62424	60S ribosomal protein L7a	RPL7A	Short-Control	1.85423	0.713416	2.59908	6	0.0407125	0.0689568	NA	0.435897	0
P62495	P62495	Eukaryotic peptide chain release factor subunit 1	ETF1	Short-Control	2.86767	0.338149	8.48051	5	0.000374609	0.00468294	NA	0.166667	0
P62701;Q8TD47;P22090	P62701	40S ribosomal protein S4, X isoform	RPS4X	Short-Control	1.30296	0.556035	2.34331	5	0.0661074	0.100647	NA	0.633333	0
P62750	P62750	60S ribosomal protein L23a	RPL23A	Short-Control	2.57856	0.572998	4.50012	3	0.020489	0.0399251	NA	0.583333	0
P62753	P62753	40S ribosomal protein S6	RPS6	Short-Control	3.52541	0.290941	12.1173	6	1.91953e-05	0.00101446	NA	0.515152	0
P62826	P62826	GTP-binding nuclear protein Ran	RAN	Short-Control	3.77889	0.256916	14.7087	4	0.000124334	0.00280787	NA	0.479167	0
P62829	P62829	60S ribosomal protein L23	RPL23	Short-Control	2.69806	0.511779	5.27193	4	0.00620403	0.0180784	NA	0.611111	0
P62847	P62847	40S ribosomal protein S24	RPS24	Short-Control	1.73606	0.757395	2.29215	6	0.0617616	0.0956423	NA	0.222222	0
P62854;Q5JNZ5	P62854	40S ribosomal protein S26;Putative 40S ribosomal protein S26-like 1	RPS26;RPS26P11	Short-Control	2.0752	0.526481	3.94165	3	0.0291045	0.0524045	NA	0.333333	0
P62888	P62888	60S ribosomal protein L30	RPL30	Short-Control	0.653714	0.527047	1.24033	4	0.282636	0.335941	NA	0.583333	0
P62899	P62899	60S ribosomal protein L31	RPL31	Short-Control	1.50221	0.214045	7.01818	2	0.0197045	0.0395549	NA	0.5	0
P62906	P62906	60S ribosomal protein L10a	RPL10A	Short-Control	1.25679	0.913547	1.37573	5	0.227337	0.282607	NA	0.566667	0
P62910	P62910	60S ribosomal protein L32	RPL32	Short-Control	Inf	NA	NA	NA	NA	0	oneConditionMissing	0.666667	0
P62913	P62913	60S ribosomal protein L11	RPL11	Short-Control	2.76302	0.414957	6.65857	5	0.00115288	0.00752754	NA	0.458333	0
P62917	P62917	60S ribosomal protein L8	RPL8	Short-Control	1.24336	0.664021	1.87248	6	0.1103	0.156499	NA	0.444444	0
P63010;Q10567	P63010	AP-2 complex subunit beta;AP-1 complex subunit beta-1	AP2B1;AP1B1	Short-Control	Inf	NA	NA	NA	NA	0	oneConditionMissing	0.666667	0
P63173	P63173	60S ribosomal protein L38	RPL38	Short-Control	Inf	NA	NA	NA	NA	0	oneConditionMissing	0.833333	0
P63244	P63244	Guanine nucleotide-binding protein subunit beta-2-like 1;Guanine nucleotide-binding protein subunit beta-2-like 1, N-terminally processed	GNB2L1	Short-Control	2.69827	0.817831	3.2993	5	0.0214921	0.0409685	NA	0.6	0
P63261	P63261	Actin, cytoplasmic 2;Actin, cytoplasmic 2, N-terminally processed	ACTG1	Short-Control	0.646702	0.732162	0.883277	2	0.470263	0.520168	NA	0.5	0
P67809	P67809	Nuclease-sensitive element-binding protein 1	YBX1	Short-Control	0.00646573	0.467919	0.013818	4	0.989637	0.989637	NA	0.583333	0
P68104;Q5VTE0	P68104	Elongation factor 1-alpha 1;Putative elongation factor 1-alpha-like 3	EEF1A1;EEF1A1P5	Short-Control	3.37776	0.64503	5.23659	5	0.00336333	0.0124858	NA	0.5	0
P68371;Q3ZCM7	P68371	Tubulin beta-4B chain	TUBB4B	Short-Control	2.7055	0.334084	8.09828	5	0.000465461	0.00522653	NA	0.333333	0
P68400;Q8NEV1	P68400	Casein kinase II subunit alpha;Casein kinase II subunit alpha 3	CSNK2A1;CSNK2A3	Short-Control	Inf	NA	NA	NA	NA	0	oneConditionMissing	0.583333	0
P68431;P84243;Q71DI3;Q16695;Q6NXT2	P68431	Histone H3.1;Histone H3.3;Histone H3.2;Histone H3.1t;Histone H3.3C	HIST1H3A;H3F3A;HIST2H3A;HIST3H3;H3F3C	Short-Control	-0.96482	NA	NA	0	NA	NA	NA	0.666667	0
P78344	P78344	Eukaryotic translation initiation factor 4 gamma 2	EIF4G2	Short-Control	Inf	NA	NA	NA	NA	0	oneConditionMissing	0.722222	0
P78371	P78371	T-complex protein 1 subunit beta	CCT2	Short-Control	0.787779	0.873095	0.902283	3	0.433412	0.483352	NA	0.5	0
P78527	P78527	DNA-dependent protein kinase catalytic subunit	PRKDC	Short-Control	2.63825	0.36634	7.20164	4	0.00197045	0.00925494	NA	0.601449	0
P81605	P81605	Dermcidin;Survival-promoting peptide;DCD-1	DCD	Short-Control	#NAME?	NA	NA	NA	NA	0	oneConditionMissing	0.833333	0
P82650	P82650	28S ribosomal protein S22, mitochondrial	MRPS22	Short-Control	Inf	NA	NA	NA	NA	0	oneConditionMissing	0.666667	0
P82675	P82675	28S ribosomal protein S5, mitochondrial	MRPS5	Short-Control	Inf	NA	NA	NA	NA	0	oneConditionMissing	0.666667	0
P83731	P83731	60S ribosomal protein L24	RPL24	Short-Control	2.70132	0.613312	4.40448	5	0.00699254	0.0197394	NA	0.547619	0
P84098	P84098	60S ribosomal protein L19	RPL19	Short-Control	2.04812	0.247219	8.28463	4	0.0011588	0.00752754	NA	0.444444	0
P84103	P84103	Serine/arginine-rich splicing factor 3	SRSF3	Short-Control	0.399573	0.267601	1.49316	2	0.273959	0.329339	NA	0.5	0
Q00325	Q00325	Phosphate carrier protein, mitochondrial	SLC25A3	Short-Control	4.15326	0.639604	6.49349	4	0.00290078	0.011733	NA	0.555556	0
Q00341	Q00341	Vigilin	HDLBP	Short-Control	Inf	NA	NA	NA	NA	0	oneConditionMissing	0.833333	0
Q00610;P53675	Q00610	Clathrin heavy chain 1	CLTC	Short-Control	1.31076	0.335787	3.90354	5	0.0113687	0.0272647	NA	0.520833	0
Q00839	Q00839	Heterogeneous nuclear ribonucleoprotein U	HNRNPU	Short-Control	3.01898	0.576056	5.24077	6	0.00193695	0.00925494	NA	0.47619	0
Q01081;P0DN76	Q01081	Splicing factor U2AF 35 kDa subunit	U2AF1	Short-Control	0.241711	1.25398	0.192755	2	0.86495	0.881209	NA	0.333333	0
Q01085	Q01085	Nucleolysin TIAR	TIAL1	Short-Control	-0.670485	0.662809	-1.01158	2	0.418218	0.470599	NA	0.5	0
Q01780	Q01780	Exosome component 10	EXOSC10	Short-Control	2.35145	0.470846	4.9941	5	0.00412551	0.0137345	NA	0.592593	0
Q01813	Q01813	ATP-dependent 6-phosphofructokinase, platelet type	PFKP	Short-Control	Inf	NA	NA	NA	NA	0	oneConditionMissing	0.777778	0
Q01844	Q01844	RNA-binding protein EWS	EWSR1	Short-Control	0.535415	0.828196	0.646484	4	0.55319	0.602066	NA	0.416667	0
Q02543	Q02543	60S ribosomal protein L18a	RPL18A	Short-Control	1.82231	0.678304	2.68657	4	0.054853	0.0879595	NA	0.611111	0
Q02878	Q02878	60S ribosomal protein L6	RPL6	Short-Control	2.36321	0.440297	5.36731	6	0.00171618	0.00861267	NA	0.638889	0
Q04637;O43432	Q04637	Eukaryotic translation initiation factor 4 gamma 1	EIF4G1	Short-Control	Inf	NA	NA	NA	NA	0	oneConditionMissing	0.666667	0
Q06210;O94808	Q06210	Glutamine--fructose-6-phosphate aminotransferase [isomerizing] 1	GFPT1	Short-Control	Inf	NA	NA	NA	NA	0	oneConditionMissing	0.833333	0
Q06830;Q13162;P32119	Q06830	Peroxiredoxin-1	PRDX1	Short-Control	1.09669	0.306466	3.57851	6	0.011664	0.0277276	NA	0.566667	0
Q07020	Q07020	60S ribosomal protein L18	RPL18	Short-Control	2.90782	0.244816	11.8776	6	2.15492e-05	0.00101446	NA	0.479167	0
Q07666;Q5VWX1	Q07666	KH domain-containing, RNA-binding, signal transduction-associated protein 1	KHDRBS1	Short-Control	-0.240911	0.553911	-0.434927	6	0.678823	0.721416	NA	0.404762	0
Q07955	Q07955	Serine/arginine-rich splicing factor 1	SRSF1	Short-Control	1.04053	0.861981	1.20714	3	0.313875	0.369827	NA	0.444444	0
Q08211	Q08211	ATP-dependent RNA helicase A	DHX9	Short-Control	1.98265	0.6543	3.03018	6	0.0230927	0.0434592	NA	0.489247	0
Q08945	Q08945	FACT complex subunit SSRP1	SSRP1	Short-Control	Inf	NA	NA	NA	NA	0	oneConditionMissing	0.833333	0
Q10570	Q10570	Cleavage and polyadenylation specificity factor subunit 1	CPSF1	Short-Control	0.874104	0.654815	1.33489	3	0.274176	0.329339	NA	0.666667	0
Q12769	Q12769	Nuclear pore complex protein Nup160	NUP160	Short-Control	Inf	NA	NA	NA	NA	0	oneConditionMissing	0.666667	0
Q12788	Q12788	Transducin beta-like protein 3	TBL3	Short-Control	0.0851735	1.03616	0.0822015	3	0.939664	0.94665	NA	0.583333	0
Q12834	Q12834	Cell division cycle protein 20 homolog	CDC20	Short-Control	Inf	NA	NA	NA	NA	0	oneConditionMissing	0.833333	0
Q12906	Q12906	Interleukin enhancer-binding factor 3	ILF3	Short-Control	1.42993	0.433266	3.30036	4	0.0299234	0.0533503	NA	0.5	0
Q12931	Q12931	Heat shock protein 75 kDa, mitochondrial	TRAP1	Short-Control	3.59219	0.476161	7.54406	5	0.000648346	0.00578386	NA	0.559524	0
Q13045	Q13045	Protein flightless-1 homolog	FLII	Short-Control	Inf	NA	NA	NA	NA	0	oneConditionMissing	0.666667	0
Q13148	Q13148	TAR DNA-binding protein 43	TARDBP	Short-Control	-0.0608972	0.489781	-0.124336	6	0.90511	0.91867	NA	0.357143	0
Q13151	Q13151	Heterogeneous nuclear ribonucleoprotein A0	HNRNPA0	Short-Control	2.17923	1.00655	2.16505	4	0.0963424	0.139619	NA	0.52381	0
Q13200	Q13200	26S proteasome non-ATPase regulatory subunit 2	PSMD2	Short-Control	Inf	NA	NA	NA	NA	0	oneConditionMissing	0.722222	0
Q13242	Q13242	Serine/arginine-rich splicing factor 9	SRSF9	Short-Control	0.771106	0.137817	5.59514	2	0.0304898	0.0540048	NA	0.777778	0
Q13247;Q08170;Q13243	Q13247	Serine/arginine-rich splicing factor 6;Serine/arginine-rich splicing factor 4	SRSF6;SRSF4	Short-Control	0.730674	0.325246	2.24653	2	0.153721	0.198374	NA	0.666667	0
Q13263	Q13263	Transcription intermediary factor 1-beta	TRIM28	Short-Control	Inf	NA	NA	NA	NA	0	oneConditionMissing	0.75	0
Q13347	Q13347	Eukaryotic translation initiation factor 3 subunit I	EIF3I	Short-Control	Inf	NA	NA	NA	NA	0	oneConditionMissing	0.611111	0
Q13435	Q13435	Splicing factor 3B subunit 2	SF3B2	Short-Control	2.12404	0.638513	3.32655	4	0.0291996	0.0524045	NA	0.555556	0
Q13509	Q13509	Tubulin beta-3 chain	TUBB3	Short-Control	Inf	NA	NA	NA	NA	0	oneConditionMissing	0.666667	0
Q13573	Q13573	SNW domain-containing protein 1	SNW1	Short-Control	Inf	NA	NA	NA	NA	0	oneConditionMissing	0.666667	0
Q13595	Q13595	Transformer-2 protein homolog alpha	TRA2A	Short-Control	1.48718	NA	NA	0	NA	NA	NA	0.666667	0
Q13823	Q13823	Nucleolar GTP-binding protein 2	GNL2	Short-Control	1.93919	0.736361	2.63347	4	0.0579751	0.0924192	NA	0.633333	0
Q13885;Q9BVA1	Q13885	Tubulin beta-2A chain;Tubulin beta-2B chain	TUBB2A;TUBB2B	Short-Control	1.28022	NA	NA	0	NA	NA	NA	0.666667	0
Q14103	Q14103	Heterogeneous nuclear ribonucleoprotein D0	HNRNPD	Short-Control	Inf	NA	NA	NA	NA	0	oneConditionMissing	0.666667	0
Q14137	Q14137	Ribosome biogenesis protein BOP1	BOP1	Short-Control	1.88196	0.800663	2.35051	3	0.10026	0.143759	NA	0.5	0
Q14152	Q14152	Eukaryotic translation initiation factor 3 subunit A	EIF3A	Short-Control	2.58548	0.40059	6.45418	5	0.00132867	0.00782759	NA	0.645833	0
Q14166	Q14166	Tubulin--tyrosine ligase-like protein 12	TTLL12	Short-Control	Inf	NA	NA	NA	NA	0	oneConditionMissing	0.833333	0
Q14498	Q14498	RNA-binding protein 39	RBM39	Short-Control	0.684814	0.14079	4.86408	1	0.129083	0.174038	NA	0.5	0
Q14527	Q14527	Helicase-like transcription factor	HLTF	Short-Control	Inf	NA	NA	NA	NA	0	oneConditionMissing	0.666667	0
Q14566	Q14566	DNA replication licensing factor MCM6	MCM6	Short-Control	Inf	NA	NA	NA	NA	0	oneConditionMissing	0.555556	0
Q14669	Q14669	E3 ubiquitin-protein ligase TRIP12	TRIP12	Short-Control	Inf	NA	NA	NA	NA	0	oneConditionMissing	0.7	0
Q14684	Q14684	Ribosomal RNA processing protein 1 homolog B	RRP1B	Short-Control	Inf	NA	NA	NA	NA	0	oneConditionMissing	0.625	0
Q14690	Q14690	Protein RRP5 homolog	PDCD11	Short-Control	1.3613	0.376076	3.61974	5	0.0152237	0.032743	NA	0.611111	0
Q14694	Q14694	Ubiquitin carboxyl-terminal hydrolase 10	USP10	Short-Control	Inf	NA	NA	NA	NA	0	oneConditionMissing	0.777778	0
Q14697	Q14697	Neutral alpha-glucosidase AB	GANAB	Short-Control	1.34832	0.360563	3.73948	5	0.0134388	0.0308046	NA	0.533333	0
Q14739	Q14739	Lamin-B receptor	LBR	Short-Control	Inf	NA	NA	NA	NA	0	oneConditionMissing	0.666667	0
Q14807	Q14807	Kinesin-like protein KIF22	KIF22	Short-Control	Inf	NA	NA	NA	NA	0	oneConditionMissing	0.714286	0
Q14839;Q8TDI0;Q12873	Q14839	Chromodomain-helicase-DNA-binding protein 4	CHD4	Short-Control	Inf	NA	NA	NA	NA	0	oneConditionMissing	0.583333	0
Q14974	Q14974	Importin subunit beta-1	KPNB1	Short-Control	Inf	NA	NA	NA	NA	0	oneConditionMissing	0.666667	0
Q14980	Q14980	Nuclear mitotic apparatus protein 1	NUMA1	Short-Control	3.21949	0.737216	4.36709	6	0.00473395	0.0147421	NA	0.635135	0
Q15029	Q15029	116 kDa U5 small nuclear ribonucleoprotein component	EFTUD2	Short-Control	0.284465	0.265272	1.07235	3	0.362153	0.419417	NA	0.666667	0
Q15046	Q15046	Lysine--tRNA ligase	KARS	Short-Control	0.87129	0.616106	1.41419	4	0.230207	0.283573	NA	0.583333	0
Q15084	Q15084	Protein disulfide-isomerase A6	PDIA6	Short-Control	Inf	NA	NA	NA	NA	0	oneConditionMissing	0.833333	0
Q15149;P58107;Q9UPN3	Q15149	Plectin	PLEC	Short-Control	Inf	NA	NA	NA	NA	0	oneConditionMissing	0.694444	0
Q15233	Q15233	Non-POU domain-containing octamer-binding protein	NONO	Short-Control	2.29383	0.456645	5.02324	6	0.00239635	0.0103081	NA	0.512821	0
Q15269	Q15269	Periodic tryptophan protein 2 homolog	PWP2	Short-Control	Inf	NA	NA	NA	NA	0	oneConditionMissing	0.666667	0
Q15365	Q15365	Poly(rC)-binding protein 1	PCBP1	Short-Control	1.80779	0.737099	2.45258	6	0.0496168	0.0819887	NA	0.333333	0
Q15366;P57721	Q15366	Poly(rC)-binding protein 2;Poly(rC)-binding protein 3	PCBP2;PCBP3	Short-Control	1.55881	0.640338	2.43436	6	0.05086	0.0835337	NA	0.541667	0
Q15393	Q15393	Splicing factor 3B subunit 3	SF3B3	Short-Control	0.123374	0.554845	0.222357	2	0.844678	0.863803	NA	0.333333	0
Q15417	Q15417	Calponin-3	CNN3	Short-Control	Inf	NA	NA	NA	NA	0	oneConditionMissing	0.833333	0
Q15555	Q15555	Microtubule-associated protein RP/EB family member 2	MAPRE2	Short-Control	Inf	NA	NA	NA	NA	0	oneConditionMissing	0.833333	0
Q15637	Q15637	Splicing factor 1	SF1	Short-Control	-0.0364257	0.286808	-0.127003	1	0.919578	0.929871	NA	0.666667	0
Q15717;Q12926;P26378	Q15717	ELAV-like protein 1	ELAVL1	Short-Control	0.218786	0.233295	0.937806	6	0.384541	0.439708	NA	0.541667	0
Q15758	Q15758	Neutral amino acid transporter B(0)	SLC1A5	Short-Control	Inf	NA	NA	NA	NA	0	oneConditionMissing	0.833333	0
Q15843	Q15843	NEDD8	NEDD8	Short-Control	1.89522	0.154614	12.2578	1	0.0518212	0.0845996	NA	0.666667	0
Q16629	Q16629	Serine/arginine-rich splicing factor 7	SRSF7	Short-Control	0.742649	0.393606	1.88678	3	0.155648	0.199908	NA	0.6	0
Q16630	Q16630	Cleavage and polyadenylation specificity factor subunit 6	CPSF6	Short-Control	1.88894	0.360155	5.24479	2	0.0344839	0.0591464	NA	0.583333	0
Q16658	Q16658	Fascin	FSCN1	Short-Control	Inf	NA	NA	NA	NA	0	oneConditionMissing	0.5	0
Q29RF7	Q29RF7	Sister chromatid cohesion protein PDS5 homolog A	PDS5A	Short-Control	Inf	NA	NA	NA	NA	0	oneConditionMissing	0.666667	0
Q3ZCQ8	Q3ZCQ8	Mitochondrial import inner membrane translocase subunit TIM50	TIMM50	Short-Control	Inf	NA	NA	NA	NA	0	oneConditionMissing	0.833333	0
Q58FF8	Q58FF8	Putative heat shock protein HSP 90-beta 2	HSP90AB2P	Short-Control	Inf	NA	NA	NA	NA	0	oneConditionMissing	0.666667	0
Q5BKZ1	Q5BKZ1	DBIRD complex subunit ZNF326	ZNF326	Short-Control	0.430459	0.350997	1.22639	5	0.274652	0.329339	NA	0.466667	0
Q5JVF3	Q5JVF3	PCI domain-containing protein 2	PCID2	Short-Control	Inf	NA	NA	NA	NA	0	oneConditionMissing	0.666667	0
Q5SSJ5	Q5SSJ5	Heterochromatin protein 1-binding protein 3	HP1BP3	Short-Control	2.13174	0.367258	5.80448	5	0.00214007	0.00950283	NA	0.533333	0
Q5T9A4	Q5T9A4	ATPase family AAA domain-containing protein 3B	ATAD3B	Short-Control	Inf	NA	NA	NA	NA	0	oneConditionMissing	0.666667	0
Q5VVJ2	Q5VVJ2	Histone H2A deubiquitinase MYSM1	MYSM1	Short-Control	Inf	NA	NA	NA	NA	0	oneConditionMissing	0.666667	0
Q68CQ4	Q68CQ4	Digestive organ expansion factor homolog	DIEXF	Short-Control	Inf	NA	NA	NA	NA	0	oneConditionMissing	0.833333	0
Q68D10	Q68D10	Protein SPT2 homolog	SPTY2D1	Short-Control	Inf	NA	NA	NA	NA	0	oneConditionMissing	0.833333	0
Q6P2Q9	Q6P2Q9	Pre-mRNA-processing-splicing factor 8	PRPF8	Short-Control	0.983606	0.482666	2.03786	4	0.111214	0.156642	NA	0.583333	0
Q6P5R6	Q6P5R6	60S ribosomal protein L22-like 1	RPL22L1	Short-Control	1.94614	0.398745	4.88067	2	0.0395087	0.0673388	NA	0.583333	0
Q6RFH5	Q6RFH5	WD repeat-containing protein 74	WDR74	Short-Control	Inf	NA	NA	NA	NA	0	oneConditionMissing	0.666667	0
Q7KZF4	Q7KZF4	Staphylococcal nuclease domain-containing protein 1	SND1	Short-Control	1.35113	0.501557	2.69388	4	0.0544386	0.0878146	NA	0.5	0
Q7KZI7	Q7KZI7	Serine/threonine-protein kinase MARK2	MARK2	Short-Control	Inf	NA	NA	NA	NA	0	oneConditionMissing	0.722222	0
Q7L014	Q7L014	Probable ATP-dependent RNA helicase DDX46	DDX46	Short-Control	0.350848	0.383622	0.914567	5	0.40237	0.456244	NA	0.520833	0
Q7L0Y3	Q7L0Y3	Mitochondrial ribonuclease P protein 1	TRMT10C	Short-Control	Inf	NA	NA	NA	NA	0	oneConditionMissing	0.833333	0
Q7L2E3	Q7L2E3	Putative ATP-dependent RNA helicase DHX30	DHX30	Short-Control	2.0232	0.355977	5.68352	4	0.00473123	0.0147421	NA	0.616667	0
Q7L2H7	Q7L2H7	Eukaryotic translation initiation factor 3 subunit M	EIF3M	Short-Control	Inf	NA	NA	NA	NA	0	oneConditionMissing	0.833333	0
Q7Z2W4	Q7Z2W4	Zinc finger CCCH-type antiviral protein 1	ZC3HAV1	Short-Control	0.977773	0.306408	3.19108	5	0.0242357	0.045193	NA	0.633333	0
Q7Z417	Q7Z417	Nuclear fragile X mental retardation-interacting protein 2	NUFIP2	Short-Control	Inf	NA	NA	NA	NA	0	oneConditionMissing	0.666667	0
Q7Z739	Q7Z739	YTH domain-containing family protein 3	YTHDF3	Short-Control	Inf	NA	NA	NA	NA	0	oneConditionMissing	0.666667	0
Q86VP6;O75155	Q86VP6	Cullin-associated NEDD8-dissociated protein 1	CAND1	Short-Control	Inf	NA	NA	NA	NA	0	oneConditionMissing	0.833333	0
Q86Y07	Q86Y07	Serine/threonine-protein kinase VRK2	VRK2	Short-Control	Inf	NA	NA	NA	NA	0	oneConditionMissing	0.666667	0
Q86YP4;Q8WXI9	Q86YP4	Transcriptional repressor p66-alpha	GATAD2A	Short-Control	Inf	NA	NA	NA	NA	0	oneConditionMissing	0.833333	0
Q8IVT2	Q8IVT2	Mitotic interactor and substrate of PLK1	MISP	Short-Control	Inf	NA	NA	NA	NA	0	oneConditionMissing	0.833333	0
Q8IXT5	Q8IXT5	RNA-binding protein 12B	RBM12B	Short-Control	2.1627	0.352644	6.13281	5	0.00167347	0.00855681	NA	0.537037	0
Q8IY37	Q8IY37	Probable ATP-dependent RNA helicase DHX37	DHX37	Short-Control	Inf	NA	NA	NA	NA	0	oneConditionMissing	0.7	0
Q8IY81	Q8IY81	pre-rRNA processing protein FTSJ3	FTSJ3	Short-Control	1.16375	0.546475	2.12956	4	0.100258	0.143759	NA	0.555556	0
Q8N163	Q8N163	Cell cycle and apoptosis regulator protein 2	CCAR2	Short-Control	Inf	NA	NA	NA	NA	0	oneConditionMissing	0.621212	0
Q8N1F7	Q8N1F7	Nuclear pore complex protein Nup93	NUP93	Short-Control	2.2658	0.588637	3.84924	4	0.0183145	0.0373062	NA	0.611111	0
Q8N5G2	Q8N5G2	Macoilin	TMEM57	Short-Control	Inf	NA	NA	NA	NA	0	oneConditionMissing	0.666667	0
Q8N7H5	Q8N7H5	RNA polymerase II-associated factor 1 homolog	PAF1	Short-Control	Inf	NA	NA	NA	NA	0	oneConditionMissing	0.666667	0
Q8NC51	Q8NC51	Plasminogen activator inhibitor 1 RNA-binding protein	SERBP1	Short-Control	0.467508	0.691505	0.676074	4	0.536067	0.585783	NA	0.583333	0
Q8NCA5	Q8NCA5	Protein FAM98A	FAM98A	Short-Control	#NAME?	NA	NA	NA	NA	0	oneConditionMissing	0.5	0
Q8NDV3	Q8NDV3	Structural maintenance of chromosomes protein 1B	SMC1B	Short-Control	Inf	NA	NA	NA	NA	0	oneConditionMissing	0.666667	0
Q8NE71	Q8NE71	ATP-binding cassette sub-family F member 1	ABCF1	Short-Control	Inf	NA	NA	NA	NA	0	oneConditionMissing	0.666667	0
Q8NHH1	Q8NHH1	Tubulin polyglutamylase TTLL11	TTLL11	Short-Control	Inf	NA	NA	NA	NA	0	oneConditionMissing	0.833333	0
Q8NI27	Q8NI27	THO complex subunit 2	THOC2	Short-Control	1.18125	0.511774	2.30815	4	0.0821996	0.121066	NA	0.5	0
Q8NI36	Q8NI36	WD repeat-containing protein 36	WDR36	Short-Control	1.68084	0.815318	2.06158	2	0.175375	0.222088	NA	0.666667	0
Q8TDD1	Q8TDD1	ATP-dependent RNA helicase DDX54	DDX54	Short-Control	Inf	NA	NA	NA	NA	0	oneConditionMissing	0.722222	0
Q8TDN6	Q8TDN6	Ribosome biogenesis protein BRX1 homolog	BRIX1	Short-Control	Inf	NA	NA	NA	NA	0	oneConditionMissing	0.666667	0
Q8TEQ6	Q8TEQ6	Gem-associated protein 5	GEMIN5	Short-Control	Inf	NA	NA	NA	NA	0	oneConditionMissing	0.722222	0
Q8WTT2	Q8WTT2	Nucleolar complex protein 3 homolog	NOC3L	Short-Control	Inf	NA	NA	NA	NA	0	oneConditionMissing	0.833333	0
Q8WUH6	Q8WUH6	Transmembrane protein 263	TMEM263	Short-Control	Inf	NA	NA	NA	NA	0	oneConditionMissing	0.666667	0
Q8WUM4	Q8WUM4	Programmed cell death 6-interacting protein	PDCD6IP	Short-Control	Inf	NA	NA	NA	NA	0	oneConditionMissing	0.666667	0
Q8WVM0	Q8WVM0	Dimethyladenosine transferase 1, mitochondrial	TFB1M	Short-Control	Inf	NA	NA	NA	NA	0	oneConditionMissing	0.666667	0
Q8WVX9	Q8WVX9	Fatty acyl-CoA reductase 1	FAR1	Short-Control	Inf	NA	NA	NA	NA	0	oneConditionMissing	0.583333	0
Q8WWM7	Q8WWM7	Ataxin-2-like protein	ATXN2L	Short-Control	Inf	NA	NA	NA	NA	0	oneConditionMissing	0.833333	0
Q8WWY3	Q8WWY3	U4/U6 small nuclear ribonucleoprotein Prp31	PRPF31	Short-Control	Inf	NA	NA	NA	NA	0	oneConditionMissing	0.666667	0
Q8WXF1	Q8WXF1	Paraspeckle component 1	PSPC1	Short-Control	Inf	NA	NA	NA	NA	0	oneConditionMissing	0.666667	0
Q8WYP5	Q8WYP5	Protein ELYS	AHCTF1	Short-Control	Inf	NA	NA	NA	NA	0	oneConditionMissing	0.666667	0
Q92499	Q92499	ATP-dependent RNA helicase DDX1	DDX1	Short-Control	-0.116976	0.42921	-0.272538	4	0.798699	0.8293	NA	0.533333	0
Q92552	Q92552	28S ribosomal protein S27, mitochondrial	MRPS27	Short-Control	Inf	NA	NA	NA	NA	0	oneConditionMissing	0.5	0
Q92598;P34932	Q92598	Heat shock protein 105 kDa	HSPH1	Short-Control	Inf	NA	NA	NA	NA	0	oneConditionMissing	0.75	0
Q92621	Q92621	Nuclear pore complex protein Nup205	NUP205	Short-Control	Inf	NA	NA	NA	NA	0	oneConditionMissing	0.666667	0
Q92804	Q92804	TATA-binding protein-associated factor 2N	TAF15	Short-Control	-0.413013	0.412768	-1.00059	6	0.355653	0.413657	NA	0.291667	0
Q92841	Q92841	Probable ATP-dependent RNA helicase DDX17	DDX17	Short-Control	1.05414	0.324309	3.25042	6	0.0174572	0.0361137	NA	0.5	0
Q92922	Q92922	SWI/SNF complex subunit SMARCC1	SMARCC1	Short-Control	Inf	NA	NA	NA	NA	0	oneConditionMissing	0.666667	0
Q92925;Q96GM5;Q6STE5	Q92925	SWI/SNF-related matrix-associated actin-dependent regulator of chromatin subfamily D member 2	SMARCD2	Short-Control	Inf	NA	NA	NA	NA	0	oneConditionMissing	0.666667	0
Q92945	Q92945	Far upstream element-binding protein 2	KHSRP	Short-Control	-1.04886	0.611123	-1.71627	6	0.136927	0.182795	NA	0.291667	0
Q93009	Q93009	Ubiquitin carboxyl-terminal hydrolase 7	USP7	Short-Control	Inf	NA	NA	NA	NA	0	oneConditionMissing	0.833333	0
Q969S3	Q969S3	Zinc finger protein 622	ZNF622	Short-Control	Inf	NA	NA	NA	NA	0	oneConditionMissing	0.75	0
Q969V3	Q969V3	Nicalin	NCLN	Short-Control	Inf	NA	NA	NA	NA	0	oneConditionMissing	0.666667	0
Q96CW1	Q96CW1	AP-2 complex subunit mu	AP2M1	Short-Control	3.20307	0.416307	7.69402	4	0.00153513	0.00838497	NA	0.5	0
Q96D46	Q96D46	60S ribosomal export protein NMD3	NMD3	Short-Control	Inf	NA	NA	NA	NA	0	oneConditionMissing	0.833333	0
Q96EK5	Q96EK5	KIF1-binding protein	KIAA1279	Short-Control	Inf	NA	NA	NA	NA	0	oneConditionMissing	0.5	0
Q96EY1	Q96EY1	DnaJ homolog subfamily A member 3, mitochondrial	DNAJA3	Short-Control	Inf	NA	NA	NA	NA	0	oneConditionMissing	0.625	0
Q96GQ7	Q96GQ7	Probable ATP-dependent RNA helicase DDX27	DDX27	Short-Control	Inf	NA	NA	NA	NA	0	oneConditionMissing	0.833333	0
Q96HS1	Q96HS1	Serine/threonine-protein phosphatase PGAM5, mitochondrial	PGAM5	Short-Control	Inf	NA	NA	NA	NA	0	oneConditionMissing	0.833333	0
Q96I24	Q96I24	Far upstream element-binding protein 3	FUBP3	Short-Control	-0.642652	0.351507	-1.82827	4	0.141511	0.18707	NA	0.566667	0
Q96KA5	Q96KA5	Cleft lip and palate transmembrane protein 1-like protein	CLPTM1L	Short-Control	Inf	NA	NA	NA	NA	0	oneConditionMissing	0.5	0
Q96MU7	Q96MU7	YTH domain-containing protein 1	YTHDC1	Short-Control	Inf	NA	NA	NA	NA	0	oneConditionMissing	0.666667	0
Q96P70	Q96P70	Importin-9	IPO9	Short-Control	Inf	NA	NA	NA	NA	0	oneConditionMissing	0.666667	0
Q96PK6	Q96PK6	RNA-binding protein 14	RBM14	Short-Control	1.01308	0.324866	3.11845	6	0.0206255	0.0399251	NA	0.388889	0
Q96RR1	Q96RR1	Twinkle protein, mitochondrial	PEO1	Short-Control	Inf	NA	NA	NA	NA	0	oneConditionMissing	0.833333	0
Q96T37	Q96T37	Putative RNA-binding protein 15	RBM15	Short-Control	1.68395	0.575313	2.92702	4	0.0429414	0.0718341	NA	0.619048	0
Q99575	Q99575	Ribonucleases P/MRP protein subunit POP1	POP1	Short-Control	Inf	NA	NA	NA	NA	0	oneConditionMissing	0.833333	0
Q99613;B5ME19	Q99613	Eukaryotic translation initiation factor 3 subunit C;Eukaryotic translation initiation factor 3 subunit C-like protein	EIF3C;EIF3CL	Short-Control	2.86579	0.485737	5.89988	5	0.00199027	0.00925494	NA	0.571429	0
Q99623	Q99623	Prohibitin-2	PHB2	Short-Control	3.07204	0.345526	8.8909	5	0.00029953	0.00461483	NA	0.539216	0
Q99661	Q99661	Kinesin-like protein KIF2C	KIF2C	Short-Control	Inf	NA	NA	NA	NA	0	oneConditionMissing	0.666667	0
Q99832	Q99832	T-complex protein 1 subunit eta	CCT7	Short-Control	Inf	NA	NA	NA	NA	0	oneConditionMissing	0.777778	0
Q99848	Q99848	Probable rRNA-processing protein EBP2	EBNA1BP2	Short-Control	0.700084	0.471255	1.48557	1	0.377179	0.433116	NA	0.5	0
Q9BQ70	Q9BQ70	Transcription factor 25	TCF25	Short-Control	2.11399	0.373155	5.66517	4	0.00478711	0.0147421	NA	0.574074	0
Q9BQE3	Q9BQE3	Tubulin alpha-1C chain	TUBA1C	Short-Control	Inf	NA	NA	NA	NA	0	oneConditionMissing	0.833333	0
Q9BQG0	Q9BQG0	Myb-binding protein 1A	MYBBP1A	Short-Control	Inf	NA	NA	NA	NA	0	oneConditionMissing	0.666667	0
Q9BTE3	Q9BTE3	Mini-chromosome maintenance complex-binding protein	MCMBP	Short-Control	Inf	NA	NA	NA	NA	0	oneConditionMissing	0.666667	0
Q9BUF5	Q9BUF5	Tubulin beta-6 chain	TUBB6	Short-Control	2.4409	0.30393	8.0311	4	0.0013045	0.00782759	NA	0.555556	0
Q9BUJ2	Q9BUJ2	Heterogeneous nuclear ribonucleoprotein U-like protein 1	HNRNPUL1	Short-Control	0.858184	0.667246	1.28616	4	0.267787	0.325428	NA	0.541667	0
Q9BVP2	Q9BVP2	Guanine nucleotide-binding protein-like 3	GNL3	Short-Control	1.54313	0.221201	6.97613	5	0.000931266	0.00681454	NA	0.566667	0
Q9BXJ9;Q6N069	Q9BXJ9	N-alpha-acetyltransferase 15, NatA auxiliary subunit	NAA15	Short-Control	Inf	NA	NA	NA	NA	0	oneConditionMissing	0.770833	0
Q9BXY0	Q9BXY0	Protein MAK16 homolog	MAK16	Short-Control	NA	NA	NA	NA	NA	NA	completeMissing	1	0
Q9BYG3	Q9BYG3	MKI67 FHA domain-interacting nucleolar phosphoprotein	NIFK	Short-Control	0.663942	0.464871	1.42823	3	0.248536	0.304766	NA	0.666667	0
Q9BZE4	Q9BZE4	Nucleolar GTP-binding protein 1	GTPBP4	Short-Control	1.94121	0.384513	5.04849	5	0.00393834	0.0134547	NA	0.6	0
Q9BZF1	Q9BZF1	Oxysterol-binding protein-related protein 8	OSBPL8	Short-Control	Inf	NA	NA	NA	NA	0	oneConditionMissing	0.666667	0
Q9BZJ0	Q9BZJ0	Crooked neck-like protein 1	CRNKL1	Short-Control	Inf	NA	NA	NA	NA	0	oneConditionMissing	0.666667	0
Q9GZR7	Q9GZR7	ATP-dependent RNA helicase DDX24	DDX24	Short-Control	2.60683	0.55282	4.71551	6	0.00327318	0.0124858	NA	0.539216	0
Q9H0A0	Q9H0A0	N-acetyltransferase 10	NAT10	Short-Control	2.40372	0.555364	4.32818	6	0.00493846	0.0150373	NA	0.482456	0
Q9H0D6	Q9H0D6	5-3 exoribonuclease 2	XRN2	Short-Control	1.44829	0.430412	3.3649	5	0.0200007	0.0398542	NA	0.416667	0
Q9H0S4	Q9H0S4	Probable ATP-dependent RNA helicase DDX47	DDX47	Short-Control	2.3824	0.3137	7.59454	5	0.000628529	0.00578386	NA	0.566667	0
Q9H223	Q9H223	EH domain-containing protein 4	EHD4	Short-Control	Inf	NA	NA	NA	NA	0	oneConditionMissing	0.75	0
Q9H4L4	Q9H4L4	Sentrin-specific protease 3	SENP3	Short-Control	Inf	NA	NA	NA	NA	0	oneConditionMissing	0.666667	0
Q9H6R0	Q9H6R0	Putative ATP-dependent RNA helicase DHX33	DHX33	Short-Control	1.71531	0.586027	2.92701	3	0.0611482	0.0953789	NA	0.666667	0
Q9H6R4	Q9H6R4	Nucleolar protein 6	NOL6	Short-Control	0.644834	0.524105	1.23035	4	0.285973	0.338422	NA	0.583333	0
Q9H7B2	Q9H7B2	Ribosome production factor 2 homolog	RPF2	Short-Control	Inf	NA	NA	NA	NA	0	oneConditionMissing	0.833333	0
Q9H9B4	Q9H9B4	Sideroflexin-1	SFXN1	Short-Control	Inf	NA	NA	NA	NA	0	oneConditionMissing	0.666667	0
Q9HCE1	Q9HCE1	Putative helicase MOV-10	MOV10	Short-Control	1.12024	0.110582	10.1305	3	0.00204907	0.00925494	NA	0.333333	0
Q9NQ29	Q9NQ29	Putative RNA-binding protein Luc7-like 1	LUC7L	Short-Control	Inf	NA	NA	NA	NA	0	oneConditionMissing	0.666667	0
Q9NQ55	Q9NQ55	Suppressor of SWI4 1 homolog	PPAN	Short-Control	Inf	NA	NA	NA	NA	0	oneConditionMissing	0.75	0
Q9NR30	Q9NR30	Nucleolar RNA helicase 2	DDX21	Short-Control	1.73258	0.38726	4.47394	5	0.00655532	0.0188988	NA	0.673611	0
Q9NRG9	Q9NRG9	Aladin	AAAS	Short-Control	Inf	NA	NA	NA	NA	0	oneConditionMissing	0.833333	0
Q9NSD9	Q9NSD9	Phenylalanine--tRNA ligase beta subunit	FARSB	Short-Control	Inf	NA	NA	NA	NA	0	oneConditionMissing	0.833333	0
Q9NUQ2	Q9NUQ2	1-acyl-sn-glycerol-3-phosphate acyltransferase epsilon	AGPAT5	Short-Control	Inf	NA	NA	NA	NA	0	oneConditionMissing	0.5	0
Q9NUQ6	Q9NUQ6	SPATS2-like protein	SPATS2L	Short-Control	1.39833	0.406557	3.43944	5	0.0184466	0.0373062	NA	0.547619	0
Q9NUU7;Q9UMR2;Q9UHL0	Q9NUU7	ATP-dependent RNA helicase DDX19A;ATP-dependent RNA helicase DDX19B	DDX19A;DDX19B	Short-Control	Inf	NA	NA	NA	NA	0	oneConditionMissing	0.666667	0
Q9NVH1	Q9NVH1	DnaJ homolog subfamily C member 11	DNAJC11	Short-Control	Inf	NA	NA	NA	NA	0	oneConditionMissing	0.666667	0
Q9NVI7	Q9NVI7	ATPase family AAA domain-containing protein 3A	ATAD3A	Short-Control	Inf	NA	NA	NA	NA	0	oneConditionMissing	0.666667	0
Q9NVP1	Q9NVP1	ATP-dependent RNA helicase DDX18	DDX18	Short-Control	1.21506	0.264024	4.60209	5	0.00582924	0.0173596	NA	0.541667	0
Q9NW13	Q9NW13	RNA-binding protein 28	RBM28	Short-Control	2.29293	0.562238	4.07822	4	0.0151205	0.032743	NA	0.6	0
Q9NWH9	Q9NWH9	SAFB-like transcription modulator	SLTM	Short-Control	0.865067	0.385836	2.24206	5	0.0750203	0.112323	NA	0.611111	0
Q9NXE4	Q9NXE4	Sphingomyelin phosphodiesterase 4	SMPD4	Short-Control	Inf	NA	NA	NA	NA	0	oneConditionMissing	0.833333	0
Q9NY93	Q9NY93	Probable ATP-dependent RNA helicase DDX56	DDX56	Short-Control	Inf	NA	NA	NA	NA	0	oneConditionMissing	0.666667	0
Q9NYF8	Q9NYF8	Bcl-2-associated transcription factor 1	BCLAF1	Short-Control	#NAME?	NA	NA	NA	NA	0	oneConditionMissing	0.666667	0
Q9NZM1	Q9NZM1	Myoferlin	MYOF	Short-Control	Inf	NA	NA	NA	NA	0	oneConditionMissing	0.666667	0
Q9P0J1	Q9P0J1	[Pyruvate dehydrogenase [acetyl-transferring]]-phosphatase 1, mitochondrial	PDP1	Short-Control	Inf	NA	NA	NA	NA	0	oneConditionMissing	0.833333	0
Q9P0W8	Q9P0W8	Spermatogenesis-associated protein 7	SPATA7	Short-Control	2.09944	1.19262	1.76035	4	0.153153	0.198374	NA	0.166667	0
Q9P258	Q9P258	Protein RCC2	RCC2	Short-Control	1.56463	NA	NA	0	NA	NA	NA	0.666667	0
Q9P275	Q9P275	Ubiquitin carboxyl-terminal hydrolase 36	USP36	Short-Control	Inf	NA	NA	NA	NA	0	oneConditionMissing	0.833333	0
Q9P287	Q9P287	BRCA2 and CDKN1A-interacting protein	BCCIP	Short-Control	Inf	NA	NA	NA	NA	0	oneConditionMissing	0.833333	0
Q9P2E9;Q8N4C6	Q9P2E9	Ribosome-binding protein 1	RRBP1	Short-Control	1.36455	0.318684	4.28182	6	0.00519521	0.0156434	NA	0.511364	0
Q9UBU9	Q9UBU9	Nuclear RNA export factor 1	NXF1	Short-Control	Inf	NA	NA	NA	NA	0	oneConditionMissing	0.666667	0
Q9UBX3	Q9UBX3	Mitochondrial dicarboxylate carrier	SLC25A10	Short-Control	Inf	NA	NA	NA	NA	0	oneConditionMissing	0.666667	0
Q9UG63	Q9UG63	ATP-binding cassette sub-family F member 2	ABCF2	Short-Control	1.96316	0.418298	4.69322	4	0.00935534	0.0236944	NA	0.5625	0
Q9UHD1	Q9UHD1	Cysteine and histidine-rich domain-containing protein 1	CHORDC1	Short-Control	Inf	NA	NA	NA	NA	0	oneConditionMissing	0.666667	0
Q9UHD8	Q9UHD8	Septin-9	40057	Short-Control	Inf	NA	NA	NA	NA	0	oneConditionMissing	0.611111	0
Q9UHX1	Q9UHX1	Poly(U)-binding-splicing factor PUF60	PUF60	Short-Control	-0.0395647	0.92951	-0.0425651	3	0.968723	0.972311	NA	0.555556	0
Q9UIF9	Q9UIF9	Bromodomain adjacent to zinc finger domain protein 2A	BAZ2A	Short-Control	1.70856	0.65177	2.62142	4	0.0587117	0.093046	NA	0.583333	0
Q9UMS4	Q9UMS4	Pre-mRNA-processing factor 19	PRPF19	Short-Control	0.98101	0.553756	1.77156	4	0.151165	0.19695	NA	0.722222	0
Q9UN86	Q9UN86	Ras GTPase-activating protein-binding protein 2	G3BP2	Short-Control	1.73706	0.307544	5.64816	1	0.111557	0.156642	NA	0.5	0
Q9UNQ2	Q9UNQ2	Probable dimethyladenosine transferase	DIMT1	Short-Control	Inf	NA	NA	NA	NA	0	oneConditionMissing	0.833333	0
Q9UPP1;O75151	Q9UPP1	Histone lysine demethylase PHF8;Lysine-specific demethylase PHF2	PHF8;PHF2	Short-Control	Inf	NA	NA	NA	NA	0	oneConditionMissing	0.833333	0
Q9Y230	Q9Y230	RuvB-like 2	RUVBL2	Short-Control	0.744972	0.017015	43.7834	1	0.0145377	0.0322927	NA	0.666667	0
Q9Y262	Q9Y262	Eukaryotic translation initiation factor 3 subunit L	EIF3L	Short-Control	Inf	NA	NA	NA	NA	0	oneConditionMissing	0.625	0
Q9Y265	Q9Y265	RuvB-like 1	RUVBL1	Short-Control	1.43787	0.13807	10.414	2	0.00909507	0.0232525	NA	0.5	0
Q9Y285	Q9Y285	Phenylalanine--tRNA ligase alpha subunit	FARSA	Short-Control	2.20419	0.537739	4.09899	4	0.0148653	0.0326109	NA	0.5	0
Q9Y2L1	Q9Y2L1	Exosome complex exonuclease RRP44	DIS3	Short-Control	Inf	NA	NA	NA	NA	0	oneConditionMissing	0.666667	0
Q9Y2R4	Q9Y2R4	Probable ATP-dependent RNA helicase DDX52	DDX52	Short-Control	1.28723	0.498662	2.58136	4	0.0612396	0.0953789	NA	0.625	0
Q9Y2W1	Q9Y2W1	Thyroid hormone receptor-associated protein 3	THRAP3	Short-Control	Inf	NA	NA	NA	NA	0	oneConditionMissing	0.666667	0
Q9Y2X3	Q9Y2X3	Nucleolar protein 58	NOP58	Short-Control	2.18937	0.624224	3.50735	4	0.0247311	0.0455927	NA	0.5	0
Q9Y305	Q9Y305	Acyl-coenzyme A thioesterase 9, mitochondrial	ACOT9	Short-Control	Inf	NA	NA	NA	NA	0	oneConditionMissing	0.5	0
Q9Y3I0	Q9Y3I0	tRNA-splicing ligase RtcB homolog	RTCB	Short-Control	0.994406	0.602826	1.64957	3	0.197593	0.249058	NA	0.541667	0
Q9Y490	Q9Y490	Talin-1	TLN1	Short-Control	Inf	NA	NA	NA	NA	0	oneConditionMissing	0.666667	0
Q9Y4I1	Q9Y4I1	Unconventional myosin-Va	MYO5A	Short-Control	Inf	NA	NA	NA	NA	0	oneConditionMissing	0.666667	0
Q9Y4P3	Q9Y4P3	Transducin beta-like protein 2	TBL2	Short-Control	Inf	NA	NA	NA	NA	0	oneConditionMissing	0.833333	0
Q9Y4W2	Q9Y4W2	Ribosomal biogenesis protein LAS1L	LAS1L	Short-Control	Inf	NA	NA	NA	NA	0	oneConditionMissing	0.666667	0
Q9Y5A9	Q9Y5A9	YTH domain-containing family protein 2	YTHDF2	Short-Control	2.27209	0.335583	6.77057	4	0.00248308	0.0105143	NA	0.416667	0
Q9Y5J1	Q9Y5J1	U3 small nucleolar RNA-associated protein 18 homolog	UTP18	Short-Control	Inf	NA	NA	NA	NA	0	oneConditionMissing	0.833333	0
Q9Y678;Q9UBF2	Q9Y678	Coatomer subunit gamma-1	COPG1	Short-Control	Inf	NA	NA	NA	NA	0	oneConditionMissing	0.666667	0
Q9Y6M1	Q9Y6M1	Insulin-like growth factor 2 mRNA-binding protein 2	IGF2BP2	Short-Control	0.771782	0.361545	2.13468	1	0.2789	0.332959	NA	0.666667	0
A0A0B4J1Y9;P0DTE1;A0A0C4DH36;A0A0A0MS15;A0A0B4J1V0;A0A0B4J1V6;A0A075B6Q5;A0A0B4J1X8;P0DP04;P0DP03;P0DP02;A0A0J9YX35;A0A0C4DH32;A0A0B4J1X5;A0A0B4J1V1;A0A0C4DH42;P01764;P01762;P01772;P01780;P01782;P01763;P01766;P01767;P01768	A0A0B4J1Y9	Ig heavy chain V-III region 23;Ig heavy chain V-III region TRO;Ig heavy chain V-III region KOL;Ig heavy chain V-III region JON;Ig heavy chain V-III region DOB;Ig heavy chain V-III region WEA;Ig heavy chain V-III region BRO;Ig heavy chain V-III region BUT;Ig heavy chain V-III region CAM	IGHV3-72;IGHV3-38;IGHV3-49;IGHV3-15;IGHV3-73;IGHV3-64;IGHV3-43;IGHV3-20;IGHV3-74;IGHV3-21;IGHV3-66;IGHV3-23	Long-Short	-0.542369	0.976773	-0.555266	3	0.617431	0.992421	NA	0.666667	0
A0FGR8	A0FGR8	Extended synaptotagmin-2	ESYT2	Long-Short	-0.52126	0.358846	-1.4526	2	0.283488	0.992421	NA	0.5	0
A6NHQ2	A6NHQ2	rRNA/tRNA 2-O-methyltransferase fibrillarin-like protein 1	FBLL1	Long-Short	-0.479537	0.960105	-0.499463	1	0.705106	0.992421	NA	0.5	0
A6NHR9	A6NHR9	Structural maintenance of chromosomes flexible hinge domain-containing protein 1	SMCHD1	Long-Short	0.0399096	0.223623	0.178468	3	0.869727	0.992421	NA	0.416667	0
O00148	O00148	ATP-dependent RNA helicase DDX39A	DDX39A	Long-Short	-0.0666624	0.435114	-0.153207	4	0.885653	0.992421	NA	0.388889	0
O00154	O00154	Cytosolic acyl coenzyme A thioester hydrolase	ACOT7	Long-Short	-0.0825749	0.490662	-0.168293	3	0.877059	0.992421	NA	0.388889	0
O00159	O00159	Unconventional myosin-Ic	MYO1C	Long-Short	0.253191	0.270394	0.936379	4	0.402091	0.992421	NA	0.263889	0
O00203	O00203	AP-3 complex subunit beta-1	AP3B1	Long-Short	0.547818	1.33104	0.411572	2	0.720568	0.992421	NA	0.333333	0
O00231	O00231	26S proteasome non-ATPase regulatory subunit 11	PSMD11	Long-Short	0.456455	0.735801	0.620351	1	0.646517	0.992421	NA	0.5	0
O00267	O00267	Transcription elongation factor SPT5	SUPT5H	Long-Short	-0.434073	0.112607	-3.85475	4	0.0182286	0.992421	NA	0	0
O00303	O00303	Eukaryotic translation initiation factor 3 subunit F	EIF3F	Long-Short	-0.117178	0.490305	-0.238989	4	0.822859	0.992421	NA	0.266667	0
O00425;Q9NZI8	O00425	Insulin-like growth factor 2 mRNA-binding protein 3	IGF2BP3	Long-Short	0.0776862	0.432074	0.179798	5	0.86437	0.992421	NA	0.361111	0
O00541	O00541	Pescadillo homolog	PES1	Long-Short	-0.189251	0.552406	-0.342594	4	0.74915	0.992421	NA	0.266667	0
O00567	O00567	Nucleolar protein 56	NOP56	Long-Short	-0.125357	0.293159	-0.427606	5	0.686729	0.992421	NA	0.25	0
O00571;O15523;Q9NQI0	O00571	ATP-dependent RNA helicase DDX3X;ATP-dependent RNA helicase DDX3Y	DDX3X;DDX3Y	Long-Short	0.264726	0.617607	0.428632	6	0.683153	0.992421	NA	0.286667	0
O00767	O00767	Acyl-CoA desaturase	SCD	Long-Short	0.464362	0.53236	0.87227	2	0.475036	0.992421	NA	0.333333	0
O14617	O14617	AP-3 complex subunit delta-1	AP3D1	Long-Short	-0.255794	0.371791	-0.688005	1	0.616354	0.992421	NA	0.5	0
O14646	O14646	Chromodomain-helicase-DNA-binding protein 1	CHD1	Long-Short	0.100676	0.241176	0.417437	3	0.704434	0.992421	NA	0.166667	0
O14980	O14980	Exportin-1	XPO1	Long-Short	-0.348501	0.521804	-0.667877	4	0.540773	0.992421	NA	0.388889	0
O15042	O15042	U2 snRNP-associated SURP motif-containing protein	U2SURP	Long-Short	-0.0458577	0.726774	-0.0630976	3	0.953658	0.992421	NA	0.583333	0
O15226	O15226	NF-kappa-B-repressing factor	NKRF	Long-Short	0.0742627	0.173491	0.42805	5	0.686426	0.992421	NA	0.3	0
O15269	O15269	Serine palmitoyltransferase 1	SPTLC1	Long-Short	-0.675114	0.760549	-0.887667	1	0.53784	0.992421	NA	0.5	0
O15371	O15371	Eukaryotic translation initiation factor 3 subunit D	EIF3D	Long-Short	0.183421	0.506675	0.362009	5	0.732142	0.992421	NA	0.283333	0
O15372	O15372	Eukaryotic translation initiation factor 3 subunit H	EIF3H	Long-Short	0.312827	0.234288	1.33523	1	0.409232	0.992421	NA	0.5	0
O15479	O15479	Melanoma-associated antigen B2	MAGEB2	Long-Short	0.359435	0.17654	2.03599	5	0.0973644	0.992421	NA	0.166667	0
O43143;Q14562;O60231	O43143	Pre-mRNA-splicing factor ATP-dependent RNA helicase DHX15	DHX15	Long-Short	-0.0850727	0.490334	-0.173499	5	0.869064	0.992421	NA	0.361111	0
O43172	O43172	U4/U6 small nuclear ribonucleoprotein Prp4	PRPF4	Long-Short	0.434159	0.339658	1.27822	3	0.291097	0.992421	NA	0.416667	0
O43242	O43242	26S proteasome non-ATPase regulatory subunit 3	PSMD3	Long-Short	0.298876	0.476547	0.627169	4	0.564568	0.992421	NA	0.270833	0
O43390	O43390	Heterogeneous nuclear ribonucleoprotein R	HNRNPR	Long-Short	-0.034069	0.816645	-0.0417183	2	0.970514	0.992421	NA	0.666667	0
O43395	O43395	U4/U6 small nuclear ribonucleoprotein Prp3	PRPF3	Long-Short	0.196675	0.360935	0.544905	2	0.64046	0.992421	NA	0.333333	0
O43542	O43542	DNA repair protein XRCC3	XRCC3	Long-Short	-0.0281048	0.855485	-0.0328524	1	0.979093	0.992421	NA	0.5	0
O43684	O43684	Mitotic checkpoint protein BUB3	BUB3	Long-Short	0.541568	0.430128	1.25909	3	0.297056	0.992421	NA	0.416667	0
O43707;P12814	O43707	Alpha-actinin-4	ACTN4	Long-Short	-0.20471	0.28453	-0.719467	6	0.498905	0.992421	NA	0.0833333	0
O43795;Q9UBC5	O43795	Unconventional myosin-Ib	MYO1B	Long-Short	0.132122	0.414381	0.318842	4	0.765801	0.992421	NA	0.321429	0
O43837	O43837	Isocitrate dehydrogenase [NAD] subunit beta, mitochondrial	IDH3B	Long-Short	0.251594	0.570834	0.440747	2	0.70246	0.992421	NA	0.333333	0
O60264;P28370	O60264	SWI/SNF-related matrix-associated actin-dependent regulator of chromatin subfamily A member 5	SMARCA5	Long-Short	-0.142223	0.421116	-0.337729	5	0.749285	0.992421	NA	0.366667	0
O60506	O60506	Heterogeneous nuclear ribonucleoprotein Q	SYNCRIP	Long-Short	0.0359344	NA	NA	0	NA	NA	NA	0.666667	0
O60684;O15131	O60684	Importin subunit alpha-7	KPNA6	Long-Short	-0.00931993	0.511951	-0.0182047	2	0.987128	0.992421	NA	0.333333	0
O60762	O60762	Dolichol-phosphate mannosyltransferase subunit 1	DPM1	Long-Short	-1.62185	0.556301	-2.91541	1	0.210358	0.992421	NA	0.5	0
O60884	O60884	DnaJ homolog subfamily A member 2	DNAJA2	Long-Short	1.10852	0.73518	1.50782	1	0.372808	0.992421	NA	0.5	0
O75131;Q86YQ8;Q96A23;Q9UBL6;Q8IYJ1;Q96FN4;Q9HCH3;O95741	O75131	Copine-3	CPNE3	Long-Short	0.279252	0.702337	0.397604	1	0.759078	0.992421	NA	0.5	0
O75152;A0A1B0GTU1	O75152	Zinc finger CCCH domain-containing protein 11A	ZC3H11A	Long-Short	-0.386683	0.658616	-0.587115	1	0.662024	0.992421	NA	0.5	0
O75534	O75534	Cold shock domain-containing protein E1	CSDE1	Long-Short	0.112442	0.331716	0.33897	3	0.756972	0.992421	NA	0.333333	0
O75607	O75607	Nucleoplasmin-3	NPM3	Long-Short	-0.405874	0.4818	-0.842413	2	0.488239	0.992421	NA	0.333333	0
O75694	O75694	Nuclear pore complex protein Nup155	NUP155	Long-Short	0.162595	0.442839	0.367166	4	0.732095	0.992421	NA	0.333333	0
O75821	O75821	Eukaryotic translation initiation factor 3 subunit G	EIF3G	Long-Short	0.474049	0.343106	1.38164	4	0.239237	0.992421	NA	0.25	0
O75943	O75943	Cell cycle checkpoint protein RAD17	RAD17	Long-Short	1.8347	1.2612	1.45472	1	0.383393	0.992421	NA	0.5	0
O76021	O76021	Ribosomal L1 domain-containing protein 1	RSL1D1	Long-Short	-0.288597	0.499421	-0.577863	5	0.588404	0.992421	NA	0.416667	0
O76094	O76094	Signal recognition particle subunit SRP72	SRP72	Long-Short	-0.235791	0.999205	-0.235979	3	0.828642	0.992421	NA	0.5	0
O94776	O94776	Metastasis-associated protein MTA2	MTA2	Long-Short	0.339079	0.577462	0.587188	2	0.616535	0.992421	NA	0.333333	0
O94832	O94832	Unconventional myosin-Id	MYO1D	Long-Short	0.172918	0.227555	0.759895	3	0.502578	0.992421	NA	0.5	0
O94906	O94906	Pre-mRNA-processing factor 6	PRPF6	Long-Short	0.231374	0.147026	1.57369	4	0.19067	0.992421	NA	0.351852	0
O94973	O94973	AP-2 complex subunit alpha-2	AP2A2	Long-Short	-0.0323451	0.488626	-0.066196	2	0.953244	0.992421	NA	0.333333	0
O95299	O95299	NADH dehydrogenase [ubiquinone] 1 alpha subcomplex subunit 10, mitochondrial	NDUFA10	Long-Short	-1.41672	1.1783	-1.20234	2	0.352269	0.992421	NA	0.333333	0
O95373	O95373	Importin-7	IPO7	Long-Short	0.57176	0.29664	1.92745	3	0.149539	0.992421	NA	0.166667	0
O95433	O95433	Activator of 90 kDa heat shock protein ATPase homolog 1	AHSA1	Long-Short	0.515709	2.43228	0.212027	1	0.866989	0.992421	NA	0.5	0
O95782	O95782	AP-2 complex subunit alpha-1	AP2A1	Long-Short	-0.186356	0.2861	-0.651366	4	0.550338	0.992421	NA	0.261905	0
O95793	O95793	Double-stranded RNA-binding protein Staufen homolog 1	STAU1	Long-Short	0.281755	0.413724	0.681021	6	0.52126	0.992421	NA	0.574074	0
O96019	O96019	Actin-like protein 6A	ACTL6A	Long-Short	Inf	NA	NA	NA	NA	0	oneConditionMissing	0.5	0
P00338;P07864;Q6ZMR3	P00338	L-lactate dehydrogenase A chain	LDHA	Long-Short	0.245289	0.651022	0.376775	3	0.731412	0.992421	NA	0.583333	0
P02545	P02545	Prelamin-A/C;Lamin-A/C	LMNA	Long-Short	-0.20435	0.121645	-1.67989	6	0.14398	0.992421	NA	0.25641	0
P04075	P04075	Fructose-bisphosphate aldolase A	ALDOA	Long-Short	Inf	NA	NA	NA	NA	0	oneConditionMissing	0.833333	0
P04083	P04083	Annexin A1	ANXA1	Long-Short	-0.063561	1.36115	-0.0466964	2	0.966999	0.992421	NA	0.5	0
P04406	P04406	Glyceraldehyde-3-phosphate dehydrogenase	GAPDH	Long-Short	0.384209	0.283709	1.35423	5	0.233647	0.992421	NA	0.472222	0
P04792	P04792	Heat shock protein beta-1	HSPB1	Long-Short	-0.017369	0.591229	-0.0293777	6	0.977516	0.992421	NA	0.266667	0
P04843	P04843	Dolichyl-diphosphooligosaccharide--protein glycosyltransferase subunit 1	RPN1	Long-Short	-0.115048	0.394995	-0.291265	5	0.782545	0.992421	NA	0.347222	0
P04899;P08754;P63096;P19087;A8MTJ3;P11488;P63092;P09471;Q5JWF2;P38405	P04899	Guanine nucleotide-binding protein G(i) subunit alpha-2;Guanine nucleotide-binding protein G(k) subunit alpha;Guanine nucleotide-binding protein G(i) subunit alpha-1;Guanine nucleotide-binding protein G(t) subunit alpha-2;Guanine nucleotide-binding protein G(t) subunit alpha-3;Guanine nucleotide-binding protein G(t) subunit alpha-1;Guanine nucleotide-binding protein G(s) subunit alpha isoforms sh…	GNAI2;GNAI3;GNAI1;GNAT2;GNAT3;GNAT1;GNAS;GNAO1;GNAL	Long-Short	-0.165884	0.552529	-0.300226	5	0.776086	0.992421	NA	0	0
P05023;P13637	P05023	Sodium/potassium-transporting ATPase subunit alpha-1;Sodium/potassium-transporting ATPase subunit alpha-3	ATP1A1;ATP1A3	Long-Short	-0.116237	0.442196	-0.262863	3	0.809675	0.992421	NA	0.166667	0
P05141;Q9H0C2	P05141	ADP/ATP translocase 2;ADP/ATP translocase 2, N-terminally processed	SLC25A5	Long-Short	0.223415	0.432447	0.516628	4	0.632665	0.992421	NA	0.0555556	0
P05198	P05198	Eukaryotic translation initiation factor 2 subunit 1	EIF2S1	Long-Short	-0.286276	0.494462	-0.578964	2	0.621131	0.992421	NA	0.333333	0
P05387	P05387	60S acidic ribosomal protein P2	RPLP2	Long-Short	-0.355765	0.145681	-2.44208	1	0.247427	0.992421	NA	0.5	0
P05388;Q8NHW5	P05388	60S acidic ribosomal protein P0;60S acidic ribosomal protein P0-like	RPLP0;RPLP0P6	Long-Short	0.319955	0.84948	0.376648	6	0.719395	0.992421	NA	0.466667	0
P05783;Q92764;CON__H-INV:HIT000015463;CON__Q92764;CON__Q14532	P05783	Keratin, type I cytoskeletal 18	KRT18	Long-Short	0.152612	0.604419	0.252494	6	0.809087	0.992421	NA	0.222222	0
P06493;P50750;Q00536;Q00537;O94921;Q07002;Q00535;P11802;Q96Q40	P06493	Cyclin-dependent kinase 1	CDK1	Long-Short	0.0124534	0.340697	0.0365527	3	0.973138	0.992421	NA	0.5	0
P06576	P06576	ATP synthase subunit beta, mitochondrial	ATP5B	Long-Short	-0.0164842	0.530402	-0.0310787	6	0.976215	0.992421	NA	0.166667	0
P06702	P06702	Protein S100-A9	S100A9	Long-Short	-1.90429	NA	NA	0	NA	NA	NA	0.666667	0
P06733;P13929;P09104	P06733	Alpha-enolase	ENO1	Long-Short	-0.0939542	0.189926	-0.494689	6	0.638409	0.992421	NA	0.333333	0
P06737;P11216;P11217	P06737	Glycogen phosphorylase, liver form;Glycogen phosphorylase, brain form;Glycogen phosphorylase, muscle form	PYGL;PYGB;PYGM	Long-Short	0.545807	0.524432	1.04076	2	0.407278	0.992421	NA	0.333333	0
P06744;CON__Q3ZBD7	P06744	Glucose-6-phosphate isomerase	GPI	Long-Short	0.0106278	0.377098	0.0281832	3	0.979286	0.992421	NA	0.166667	0
P06748	P06748	Nucleophosmin	NPM1	Long-Short	0.235047	0.674575	0.348437	6	0.739412	0.992421	NA	0.444444	0
P07195	P07195	L-lactate dehydrogenase B chain	LDHB	Long-Short	-0.377151	0.162449	-2.32166	1	0.25892	0.992421	NA	0.5	0
P07237	P07237	Protein disulfide-isomerase	P4HB	Long-Short	-0.114405	NA	NA	0	NA	NA	NA	0.666667	0
P07305	P07305	Histone H1.0;Histone H1.0, N-terminally processed	H1F0	Long-Short	NA	NA	NA	NA	NA	NA	completeMissing	1	0
P07355;A6NMY6	P07355	Annexin A2;Putative annexin A2-like protein	ANXA2;ANXA2P2	Long-Short	-0.0402597	0.846466	-0.0475621	5	0.963907	0.992421	NA	0.194444	0
P07437;A6NNZ2;Q9H4B7;CON__ENSEMBL:ENSBTAP00000025008	P07437	Tubulin beta chain	TUBB	Long-Short	0.344694	0.475769	0.724499	6	0.496028	0.992421	NA	0.214286	0
P07814	P07814	Bifunctional glutamate/proline--tRNA ligase;Glutamate--tRNA ligase;Proline--tRNA ligase	EPRS	Long-Short	0.236612	0.389344	0.607718	6	0.565651	0.992421	NA	0.392157	0
P07900;Q58FG0	P07900	Heat shock protein HSP 90-alpha	HSP90AA1	Long-Short	-0.332075	0.440459	-0.75393	6	0.479423	0.992421	NA	0.270833	0
P07910;O60812;B7ZW38;B2RXH8;P0DMR1	P07910	Heterogeneous nuclear ribonucleoproteins C1/C2;Heterogeneous nuclear ribonucleoprotein C-like 1;Heterogeneous nuclear ribonucleoprotein C-like 3;Heterogeneous nuclear ribonucleoprotein C-like 2;Heterogeneous nuclear ribonucleoprotein C-like 4	HNRNPC;HNRNPCL1;HNRNPCL3;HNRNPCL2;HNRNPCL4	Long-Short	-0.0113238	0.572759	-0.0197706	6	0.984867	0.992421	NA	0.222222	0
P08195	P08195	4F2 cell-surface antigen heavy chain	SLC3A2	Long-Short	-0.00477436	0.308085	-0.0154969	4	0.988378	0.992421	NA	0.291667	0
P08237	P08237	ATP-dependent 6-phosphofructokinase, muscle type	PFKM	Long-Short	-0.0529935	0.531809	-0.0996477	2	0.929713	0.992421	NA	0.333333	0
P08238;Q58FF7;Q14568;Q58FF6;Q58FG1	P08238	Heat shock protein HSP 90-beta	HSP90AB1	Long-Short	0.0774843	0.465523	0.166446	6	0.873274	0.992421	NA	0.235294	0
P08621	P08621	U1 small nuclear ribonucleoprotein 70 kDa	SNRNP70	Long-Short	0.0665649	0.476438	0.139714	2	0.901686	0.992421	NA	0.5	0
P08727	P08727	Keratin, type I cytoskeletal 19	KRT19	Long-Short	0.698877	0.476304	1.46729	1	0.380839	0.992421	NA	0.5	0
P08865	P08865	40S ribosomal protein SA	RPSA	Long-Short	0.413603	0.545168	0.758672	5	0.482259	0.992421	NA	0.25	0
P09012	P09012	U1 small nuclear ribonucleoprotein A	SNRPA	Long-Short	Inf	NA	NA	NA	NA	0	oneConditionMissing	0.833333	0
P09622	P09622	Dihydrolipoyl dehydrogenase, mitochondrial	DLD	Long-Short	-0.0889783	0.918369	-0.0968873	1	0.938512	0.992421	NA	0.5	0
P09651;Q32P51	P09651	Heterogeneous nuclear ribonucleoprotein A1;Heterogeneous nuclear ribonucleoprotein A1, N-terminally processed	HNRNPA1	Long-Short	0.369616	0.586489	0.630219	6	0.551782	0.992421	NA	0.111111	0
P09874	P09874	Poly [ADP-ribose] polymerase 1	PARP1	Long-Short	0.0285984	0.292995	0.097607	5	0.926036	0.992421	NA	0.308642	0
P0CG48;P0CG47;P62979;P62987	P0CG48	Polyubiquitin-C;Ubiquitin;Polyubiquitin-B;Ubiquitin;Ubiquitin-40S ribosomal protein S27a;Ubiquitin;40S ribosomal protein S27a;Ubiquitin-60S ribosomal protein L40;Ubiquitin;60S ribosomal protein L40	UBC;UBB;RPS27A;UBA52	Long-Short	0.363638	0.229208	1.5865	5	0.173485	0.992421	NA	0.212121	0
P0DMV8;P0DMV9	P0DMV8	Heat shock 70 kDa protein 1A;Heat shock 70 kDa protein 1B	HSPA1A;HSPA1B	Long-Short	-0.228948	0.305169	-0.750233	6	0.481487	0.992421	NA	0.220238	0
P10809	P10809	60 kDa heat shock protein, mitochondrial	HSPD1	Long-Short	-0.156617	0.638836	-0.24516	6	0.814502	0.992421	NA	0.298246	0
P11021	P11021	78 kDa glucose-regulated protein	HSPA5	Long-Short	-0.251234	0.467841	-0.537006	6	0.610583	0.992421	NA	0.174603	0
P11142;P54652	P11142	Heat shock cognate 71 kDa protein	HSPA8	Long-Short	-0.24541	0.439463	-0.558431	6	0.596757	0.992421	NA	0.192029	0
P11166	P11166	Solute carrier family 2, facilitated glucose transporter member 1	SLC2A1	Long-Short	-0.342655	0.269592	-1.27101	4	0.27261	0.992421	NA	0.277778	0
P11387;Q969P6	P11387	DNA topoisomerase 1	TOP1	Long-Short	-0.0279949	0.460967	-0.0607309	6	0.953546	0.992421	NA	0.3125	0
P11586	P11586	C-1-tetrahydrofolate synthase, cytoplasmic;Methylenetetrahydrofolate dehydrogenase;Methenyltetrahydrofolate cyclohydrolase;Formyltetrahydrofolate synthetase;C-1-tetrahydrofolate synthase, cytoplasmic, N-terminally processed	MTHFD1	Long-Short	0.321981	0.663515	0.485265	4	0.652868	0.992421	NA	0.333333	0
P11940;Q9H361;Q4VXU2;Q13310;Q96DU9;Q5JQF8	P11940	Polyadenylate-binding protein 1	PABPC1	Long-Short	-0.119229	0.331454	-0.359716	5	0.733754	0.992421	NA	0.333333	0
P12236;P12235	P12236	ADP/ATP translocase 3;ADP/ATP translocase 3, N-terminally processed;ADP/ATP translocase 1	SLC25A6;SLC25A4	Long-Short	-0.132174	0.349957	-0.377687	4	0.724849	0.992421	NA	0.277778	0
P12268;P20839	P12268	Inosine-5-monophosphate dehydrogenase 2	IMPDH2	Long-Short	0.422415	0.260182	1.62353	4	0.179798	0.992421	NA	0.25	0
P12429	P12429	Annexin A3	ANXA3	Long-Short	0.228448	0.0316386	7.22055	1	0.0876105	0.992421	NA	0.5	0
P12956	P12956	X-ray repair cross-complementing protein 6	XRCC6	Long-Short	-0.0448983	0.235873	-0.190349	5	0.856523	0.992421	NA	0.333333	0
P13010	P13010	X-ray repair cross-complementing protein 5	XRCC5	Long-Short	0.258022	0.647424	0.398537	4	0.710593	0.992421	NA	0.348485	0
P13639	P13639	Elongation factor 2	EEF2	Long-Short	0.251637	0.559106	0.45007	6	0.668464	0.992421	NA	0.28125	0
P13667	P13667	Protein disulfide-isomerase A4	PDIA4	Long-Short	-0.177311	0.274724	-0.645417	5	0.547103	0.992421	NA	0.333333	0
P14618;P30613	P14618	Pyruvate kinase PKM	PKM	Long-Short	0.204113	0.591982	0.344795	6	0.742013	0.992421	NA	0.183333	0
P14625	P14625	Endoplasmin	HSP90B1	Long-Short	0.0994514	0.154044	0.645604	2	0.584716	0.992421	NA	0.333333	0
P14678;P63162	P14678	Small nuclear ribonucleoprotein-associated proteins B and B;Small nuclear ribonucleoprotein-associated protein N	SNRPB;SNRPN	Long-Short	0.189614	0.772096	0.245583	3	0.821847	0.992421	NA	0.555556	0
P14866	P14866	Heterogeneous nuclear ribonucleoprotein L	HNRNPL	Long-Short	-0.354002	0.54165	-0.653562	6	0.53762	0.992421	NA	0.35	0
P14868	P14868	Aspartate--tRNA ligase, cytoplasmic	DARS	Long-Short	0.0176373	0.551484	0.0319816	3	0.976496	0.992421	NA	0.416667	0
P15311;P35241;P26038	P15311	Ezrin	EZR	Long-Short	0.272045	0.335127	0.811767	5	0.453821	0.992421	NA	0.439394	0
P15880	P15880	40S ribosomal protein S2	RPS2	Long-Short	0.253983	0.192362	1.32034	4	0.257204	0.992421	NA	0.229167	0
P15924	P15924	Desmoplakin	DSP	Long-Short	#NAME?	NA	NA	NA	NA	0	oneConditionMissing	0.833333	0
P16403;P10412;P16402;Q02539;P22492	P16403	Histone H1.2;Histone H1.4;Histone H1.3	HIST1H1C;HIST1H1E;HIST1H1D	Long-Short	0.468263	0.492317	0.951141	3	0.411703	0.992421	NA	0.583333	0
P16615;O14983;Q93084	P16615	Sarcoplasmic/endoplasmic reticulum calcium ATPase 2	ATP2A2	Long-Short	0.103079	0.375848	0.274257	4	0.797468	0.992421	NA	0.357143	0
P17066;P48741	P17066	Heat shock 70 kDa protein 6	HSPA6	Long-Short	-0.246036	0.746596	-0.329544	6	0.752945	0.992421	NA	0	0
P17812	P17812	CTP synthase 1	CTPS1	Long-Short	-0.313984	0.669995	-0.468637	3	0.67128	0.992421	NA	0.416667	0
P17844	P17844	Probable ATP-dependent RNA helicase DDX5	DDX5	Long-Short	0.191719	0.586168	0.327072	6	0.754723	0.992421	NA	0.240741	0
P17858	P17858	ATP-dependent 6-phosphofructokinase, liver type	PFKL	Long-Short	0.385733	0.932366	0.413714	2	0.719228	0.992421	NA	0.333333	0
P17987	P17987	T-complex protein 1 subunit alpha	TCP1	Long-Short	0.224744	0.353432	0.635892	4	0.55941	0.992421	NA	0.185185	0
P18077	P18077	60S ribosomal protein L35a	RPL35A	Long-Short	1.14949	0.133613	8.60314	2	0.0132432	0.992421	NA	0.5	0
P18124	P18124	60S ribosomal protein L7	RPL7	Long-Short	0.136479	0.360219	0.378879	5	0.720334	0.992421	NA	0.347222	0
P18583	P18583	Protein SON	SON	Long-Short	0.0698684	0.109035	0.640789	4	0.556528	0.992421	NA	0.333333	0
P18621	P18621	60S ribosomal protein L17	RPL17	Long-Short	-0.179159	0.429293	-0.417336	4	0.69786	0.992421	NA	0.261905	0
P18754	P18754	Regulator of chromosome condensation	RCC1	Long-Short	-0.532252	0.563834	-0.943986	3	0.414818	0.992421	NA	0.333333	0
P19338	P19338	Nucleolin	NCL	Long-Short	-0.372223	0.376029	-0.989881	6	0.360457	0.992421	NA	0.393939	0
P19525	P19525	Interferon-induced, double-stranded RNA-activated protein kinase	EIF2AK2	Long-Short	-0.311151	0.302779	-1.02765	2	0.412153	0.992421	NA	0.583333	0
P20073	P20073	Annexin A7	ANXA7	Long-Short	1.14534	0.904482	1.26629	1	0.425538	0.992421	NA	0.5	0
P20700;Q03252	P20700	Lamin-B1	LMNB1	Long-Short	-0.555131	0.355702	-1.56067	3	0.216516	0.992421	NA	0.416667	0
P21333;O75369	P21333	Filamin-A	FLNA	Long-Short	-0.188326	0.377595	-0.498751	4	0.644135	0.992421	NA	0.433333	0
P21796	P21796	Voltage-dependent anion-selective channel protein 1	VDAC1	Long-Short	0.478928	1.74271	0.274818	1	0.82926	0.992421	NA	0.5	0
P22087	P22087	rRNA 2-O-methyltransferase fibrillarin	FBL	Long-Short	0.0637023	0.350832	0.181575	5	0.863048	0.992421	NA	0.2	0
P22102	P22102	Trifunctional purine biosynthetic protein adenosine-3;Phosphoribosylamine--glycine ligase;Phosphoribosylformylglycinamidine cyclo-ligase;Phosphoribosylglycinamide formyltransferase	GART	Long-Short	0.00421663	0.190673	0.0221144	3	0.983745	0.992421	NA	0.416667	0
P22234	P22234	Multifunctional protein ADE2;Phosphoribosylaminoimidazole-succinocarboxamide synthase;Phosphoribosylaminoimidazole carboxylase	PAICS	Long-Short	-0.206197	0.38978	-0.529009	2	0.649644	0.992421	NA	0.333333	0
P22570	P22570	NADPH:adrenodoxin oxidoreductase, mitochondrial	FDXR	Long-Short	0.139608	0.397722	0.351018	4	0.743283	0.992421	NA	0.333333	0
P22626	P22626	Heterogeneous nuclear ribonucleoproteins A2/B1	HNRNPA2B1	Long-Short	0.0589332	0.566369	0.104054	6	0.920517	0.992421	NA	0.430556	0
P22695	P22695	Cytochrome b-c1 complex subunit 2, mitochondrial	UQCRC2	Long-Short	0.0308074	0.624982	0.0492932	4	0.963049	0.992421	NA	0.270833	0
P23246	P23246	Splicing factor, proline- and glutamine-rich	SFPQ	Long-Short	-0.133964	0.755726	-0.177265	6	0.865133	0.992421	NA	0.347222	0
P23258;Q9NRH3	P23258	Tubulin gamma-1 chain;Tubulin gamma-2 chain	TUBG1;TUBG2	Long-Short	0.403617	0.216453	1.86469	3	0.159089	0.992421	NA	0.166667	0
P23396	P23396	40S ribosomal protein S3	RPS3	Long-Short	0.143584	0.54069	0.265558	6	0.799469	0.992421	NA	0.240741	0
P23528;Q9Y281	P23528	Cofilin-1	CFL1	Long-Short	-0.114495	0.445618	-0.256936	6	0.805812	0.992421	NA	0.25	0
P24928	P24928	DNA-directed RNA polymerase II subunit RPB1	POLR2A	Long-Short	0.257286	0.313006	0.821982	2	0.497487	0.992421	NA	0.333333	0
P25205	P25205	DNA replication licensing factor MCM3	MCM3	Long-Short	0.122685	0.480518	0.255318	3	0.814981	0.992421	NA	0.166667	0
P25705	P25705	ATP synthase subunit alpha, mitochondrial	ATP5A1	Long-Short	0.169859	0.537876	0.315796	6	0.762853	0.992421	NA	0.222222	0
P26196	P26196	Probable ATP-dependent RNA helicase DDX6	DDX6	Long-Short	0.219811	0.531924	0.413237	4	0.700626	0.992421	NA	0.138889	0
P26373	P26373	60S ribosomal protein L13	RPL13	Long-Short	0.145019	0.347268	0.4176	4	0.697681	0.992421	NA	0.291667	0
P26599	P26599	Polypyrimidine tract-binding protein 1	PTBP1	Long-Short	-0.129121	0.645224	-0.200118	6	0.847998	0.992421	NA	0.3125	0
P26640	P26640	Valine--tRNA ligase	VARS	Long-Short	0.602948	0.758352	0.795077	1	0.572362	0.992421	NA	0.5	0
P26641	P26641	Elongation factor 1-gamma	EEF1G	Long-Short	0.292011	0.415701	0.702455	6	0.508717	0.992421	NA	0.388889	0
P27635;Q96L21	P27635	60S ribosomal protein L10	RPL10	Long-Short	0.235424	0.313819	0.750191	5	0.486919	0.992421	NA	0.25	0
P27694	P27694	Replication protein A 70 kDa DNA-binding subunit;Replication protein A 70 kDa DNA-binding subunit, N-terminally processed	RPA1	Long-Short	-0.858258	0.319592	-2.68548	2	0.115191	0.992421	NA	0.333333	0
P27708	P27708	CAD protein;Glutamine-dependent carbamoyl-phosphate synthase;Aspartate carbamoyltransferase;Dihydroorotase	CAD	Long-Short	0.140399	0.29367	0.478085	5	0.652761	0.992421	NA	0.316667	0
P27816	P27816	Microtubule-associated protein 4	MAP4	Long-Short	-0.000956143	0.395477	-0.0024177	4	0.998187	0.998187	NA	0.333333	0
P29692	P29692	Elongation factor 1-delta	EEF1D	Long-Short	-0.00115244	0.428336	-0.00269051	2	0.998098	0.998187	NA	0.75	0
P30050	P30050	60S ribosomal protein L12	RPL12	Long-Short	-0.139562	NA	NA	0	NA	NA	NA	0.666667	0
P30101	P30101	Protein disulfide-isomerase A3	PDIA3	Long-Short	0.662863	0.885359	0.748695	2	0.532116	0.992421	NA	0.333333	0
P30876	P30876	DNA-directed RNA polymerase II subunit RPB2	POLR2B	Long-Short	0.770814	0.00482804	159.654	1	0.00398745	0.992421	NA	0.5	0
P31153	P31153	S-adenosylmethionine synthase isoform type-2	MAT2A	Long-Short	-0.0739404	0.265399	-0.2786	4	0.794361	0.992421	NA	0.444444	0
P31689	P31689	DnaJ homolog subfamily A member 1	DNAJA1	Long-Short	0.374858	0.447569	0.837542	4	0.449413	0.992421	NA	0.222222	0
P31942	P31942	Heterogeneous nuclear ribonucleoprotein H3	HNRNPH3	Long-Short	0.413271	0.250818	1.64769	5	0.160332	0.992421	NA	0.305556	0
P31943	P31943	Heterogeneous nuclear ribonucleoprotein H;Heterogeneous nuclear ribonucleoprotein H, N-terminally processed	HNRNPH1	Long-Short	0.122601	0.736651	0.166431	6	0.873285	0.992421	NA	0.395833	0
P32969	P32969	60S ribosomal protein L9	RPL9	Long-Short	0.114828	0.491658	0.233554	3	0.830361	0.992421	NA	0.333333	0
P33778;Q99880;Q93079;Q99877;Q16778;P62807;P58876;O60814;Q5QNW6;P23527;Q99879;P57053;P06899;Q8N257;Q96A08;A0A2R8Y619	P33778	Histone H2B type 1-B;Histone H2B type 1-L;Histone H2B type 1-H;Histone H2B type 1-N;Histone H2B type 2-E;Histone H2B type 1-C/E/F/G/I;Histone H2B type 1-D;Histone H2B type 1-K;Histone H2B type 2-F;Histone H2B type 1-O;Histone H2B type 1-M;Histone H2B type F-S;Histone H2B type 1-J;Histone H2B type 3-B;Histone H2B type 1-A	HIST1H2BB;HIST1H2BL;HIST1H2BH;HIST1H2BN;HIST2H2BE;HIST1H2BC;HIST1H2BD;HIST1H2BK;HIST2H2BF;HIST1H2BO;HIST1H2BM;H2BFS;HIST1H2BJ;HIST3H2BB;HIST1H2BA	Long-Short	0.324425	0.97888	0.331425	4	0.75696	0.992421	NA	0.416667	0
P33991;Q9UJA3	P33991	DNA replication licensing factor MCM4	MCM4	Long-Short	0.0313097	0.354439	0.0883361	4	0.933855	0.992421	NA	0.363636	0
P33992	P33992	DNA replication licensing factor MCM5	MCM5	Long-Short	0.172049	0.164366	1.04674	4	0.354299	0.992421	NA	0.333333	0
P33993	P33993	DNA replication licensing factor MCM7	MCM7	Long-Short	0.121345	0.195773	0.619823	5	0.562526	0.992421	NA	0.245614	0
P35030	P35030	Trypsin-3	PRSS3	Long-Short	0.0421316	1.8919	0.0222694	5	0.983094	0.992421	NA	0	0
P35232	P35232	Prohibitin	PHB	Long-Short	0.08134	0.332087	0.244936	4	0.818559	0.992421	NA	0.333333	0
P35251	P35251	Replication factor C subunit 1	RFC1	Long-Short	-0.135376	0.376755	-0.35932	3	0.743158	0.992421	NA	0.375	0
P35268	P35268	60S ribosomal protein L22	RPL22	Long-Short	0.575153	0.382329	1.50434	3	0.229545	0.992421	NA	0.333333	0
P35579;P35749;Q7Z406	P35579	Myosin-9	MYH9	Long-Short	0.350835	0.0801764	4.3758	2	0.048461	0.992421	NA	0.333333	0
P35637	P35637	RNA-binding protein FUS	FUS	Long-Short	0.110325	0.600167	0.183824	5	0.861374	0.992421	NA	0	0
P35998	P35998	26S protease regulatory subunit 7	PSMC2	Long-Short	-0.164073	0.310593	-0.528257	4	0.625271	0.992421	NA	0.333333	0
P36542	P36542	ATP synthase subunit gamma, mitochondrial	ATP5C1	Long-Short	0.0493169	0.41124	0.119922	4	0.910327	0.992421	NA	0.388889	0
P36578	P36578	60S ribosomal protein L4	RPL4	Long-Short	0.137637	0.368939	0.373062	6	0.721927	0.992421	NA	0.265873	0
P38159;Q96E39;O75526;Q8N7X1	P38159	RNA-binding motif protein, X chromosome;RNA-binding motif protein, X chromosome, N-terminally processed;RNA binding motif protein, X-linked-like-1	RBMX;RBMXL1	Long-Short	0.44449	0.294363	1.51001	3	0.228196	0.992421	NA	0.583333	0
P38646	P38646	Stress-70 protein, mitochondrial	HSPA9	Long-Short	-0.667169	0.414766	-1.60854	6	0.158841	0.992421	NA	0.275641	0
P38919	P38919	Eukaryotic initiation factor 4A-III;Eukaryotic initiation factor 4A-III, N-terminally processed	EIF4A3	Long-Short	0.0543856	0.551108	0.0986842	5	0.925223	0.992421	NA	0.416667	0
P39023;Q92901	P39023	60S ribosomal protein L3	RPL3	Long-Short	0.113779	0.274348	0.414725	6	0.692763	0.992421	NA	0.23913	0
P39656	P39656	Dolichyl-diphosphooligosaccharide--protein glycosyltransferase 48 kDa subunit	DDOST	Long-Short	0.364984	0.561822	0.649644	3	0.562229	0.992421	NA	0.444444	0
P40227;Q92526	P40227	T-complex protein 1 subunit zeta	CCT6A	Long-Short	0.203659	0.240731	0.846003	4	0.445193	0.992421	NA	0.1875	0
P40429;Q6NVV1	P40429	60S ribosomal protein L13a	RPL13A	Long-Short	0.294906	0.47911	0.615529	4	0.571502	0.992421	NA	0.166667	0
P41091;Q2VIR3	P41091	Eukaryotic translation initiation factor 2 subunit 3;Putative eukaryotic translation initiation factor 2 subunit 3-like protein	EIF2S3;EIF2S3L	Long-Short	0.421331	0.4858	0.867293	4	0.434712	0.992421	NA	0.166667	0
P41227	P41227	N-alpha-acetyltransferase 10	NAA10	Long-Short	0.323993	0.0189331	17.1125	1	0.0371598	0.992421	NA	0.5	0
P41252	P41252	Isoleucine--tRNA ligase, cytoplasmic	IARS	Long-Short	0.193045	0.336033	0.574482	4	0.596405	0.992421	NA	0.333333	0
P42212;CON__Q9U6Y5	P42212	Green fluorescent protein	GFP	Long-Short	0.244787	0.503391	0.486277	4	0.65221	0.992421	NA	0.1	0
P42224	P42224	Signal transducer and activator of transcription 1-alpha/beta	STAT1	Long-Short	0.376818	0.255436	1.47519	3	0.236623	0.992421	NA	0.166667	0
P42285	P42285	Superkiller viralicidic activity 2-like 2	SKIV2L2	Long-Short	0.0448966	0.161571	0.277875	3	0.799158	0.992421	NA	0.166667	0
P42704	P42704	Leucine-rich PPR motif-containing protein, mitochondrial	LRPPRC	Long-Short	-0.0624407	0.506736	-0.123221	3	0.909724	0.992421	NA	0.416667	0
P43243	P43243	Matrin-3	MATR3	Long-Short	-0.0202279	0.455071	-0.0444501	6	0.965988	0.992421	NA	0.472222	0
P43490	P43490	Nicotinamide phosphoribosyltransferase	NAMPT	Long-Short	0.286367	0.467927	0.61199	4	0.573621	0.992421	NA	0.25	0
P45880	P45880	Voltage-dependent anion-selective channel protein 2	VDAC2	Long-Short	-0.0230409	0.457709	-0.0503396	4	0.962265	0.992421	NA	0.125	0
P46013	P46013	Antigen KI-67	MKI67	Long-Short	-0.160762	0.2368	-0.678893	5	0.527352	0.992421	NA	0.319048	0
P46087	P46087	Probable 28S rRNA (cytosine(4447)-C(5))-methyltransferase	NOP2	Long-Short	0.191052	0.385594	0.495475	5	0.641271	0.992421	NA	0.166667	0
P46776	P46776	60S ribosomal protein L27a	RPL27A	Long-Short	0.39525	0.418006	0.94556	4	0.397914	0.992421	NA	0.0833333	0
P46777	P46777	60S ribosomal protein L5	RPL5	Long-Short	0.16869	0.307366	0.548823	4	0.612322	0.992421	NA	0.283333	0
P46778	P46778	60S ribosomal protein L21	RPL21	Long-Short	-0.0990259	0.426248	-0.23232	6	0.824011	0.992421	NA	0.277778	0
P46779	P46779	60S ribosomal protein L28	RPL28	Long-Short	0.302108	0.572634	0.527577	4	0.625702	0.992421	NA	0.3125	0
P46781	P46781	40S ribosomal protein S9	RPS9	Long-Short	0.0868769	0.223878	0.388055	4	0.717742	0.992421	NA	0.214286	0
P46940;Q86VI3;Q13576	P46940	Ras GTPase-activating-like protein IQGAP1	IQGAP1	Long-Short	-0.311315	0.67453	-0.461529	4	0.668402	0.992421	NA	0.333333	0
P47897	P47897	Glutamine--tRNA ligase	QARS	Long-Short	0.505397	0.126558	3.9934	2	0.0573641	0.992421	NA	0.444444	0
P48444	P48444	Coatomer subunit delta	ARCN1	Long-Short	0.21445	0.329914	0.650018	4	0.551125	0.992421	NA	0.296296	0
P48729;Q8N752	P48729	Casein kinase I isoform alpha;Casein kinase I isoform alpha-like	CSNK1A1;CSNK1A1L	Long-Short	0.748609	0.977805	0.765602	1	0.584025	0.992421	NA	0.5	0
P48730;P49674	P48730	Casein kinase I isoform delta	CSNK1D	Long-Short	0.319771	1.01223	0.315908	2	0.781993	0.992421	NA	0.416667	0
P49006	P49006	MARCKS-related protein	MARCKSL1	Long-Short	Inf	NA	NA	NA	NA	0	oneConditionMissing	0.833333	0
P49207	P49207	60S ribosomal protein L34	RPL34	Long-Short	-0.189676	0.440828	-0.430272	6	0.682023	0.992421	NA	0.266667	0
P49327	P49327	Fatty acid synthase;[Acyl-carrier-protein] S-acetyltransferase;[Acyl-carrier-protein] S-malonyltransferase;3-oxoacyl-[acyl-carrier-protein] synthase;3-oxoacyl-[acyl-carrier-protein] reductase;3-hydroxyacyl-[acyl-carrier-protein] dehydratase;Enoyl-[acyl-carrier-protein] reductase;Oleoyl-[acyl-carrier-protein] hydrolase	FASN	Long-Short	0.060209	0.284173	0.211874	5	0.840571	0.992421	NA	0.233333	0
P49368	P49368	T-complex protein 1 subunit gamma	CCT3	Long-Short	0.392815	0.166105	2.36485	5	0.0643622	0.992421	NA	0.216667	0
P49411	P49411	Elongation factor Tu, mitochondrial	TUFM	Long-Short	0.13477	0.40013	0.336816	5	0.749933	0.992421	NA	0.214286	0
P49750	P49750	YLP motif-containing protein 1	YLPM1	Long-Short	-0.0904525	0.245025	-0.369156	2	0.74743	0.992421	NA	0.333333	0
P49841	P49841	Glycogen synthase kinase-3 beta	GSK3B	Long-Short	-0.367507	0.614378	-0.598177	1	0.656812	0.992421	NA	0.5	0
P50416	P50416	Carnitine O-palmitoyltransferase 1, liver isoform	CPT1A	Long-Short	-0.108544	0.303421	-0.357736	4	0.738619	0.992421	NA	0.166667	0
P50454	P50454	Serpin H1	SERPINH1	Long-Short	0.417771	0.485229	0.860977	5	0.428597	0.992421	NA	0.233333	0
P50570;Q9UQ16;Q05193	P50570	Dynamin-2;Dynamin-3	DNM2;DNM3	Long-Short	0.379686	0.343113	1.10659	1	0.467815	0.992421	NA	0.5	0
P50914	P50914	60S ribosomal protein L14	RPL14	Long-Short	0.103548	0.387447	0.267257	6	0.79822	0.992421	NA	0.2	0
P50990	P50990	T-complex protein 1 subunit theta	CCT8	Long-Short	-0.269311	0.291521	-0.923813	5	0.397976	0.992421	NA	0.333333	0
P50991	P50991	T-complex protein 1 subunit delta	CCT4	Long-Short	0.219398	0.190952	1.14897	4	0.314601	0.992421	NA	0.291667	0
P51114;Q06787	P51114	Fragile X mental retardation syndrome-related protein 1	FXR1	Long-Short	-0.0375467	0.281548	-0.133358	4	0.90035	0.992421	NA	0.0833333	0
P51991	P51991	Heterogeneous nuclear ribonucleoprotein A3	HNRNPA3	Long-Short	0.3902	0.960164	0.406389	4	0.705259	0.992421	NA	0.5	0
P52272	P52272	Heterogeneous nuclear ribonucleoprotein M	HNRNPM	Long-Short	-0.0505062	0.490828	-0.1029	6	0.921395	0.992421	NA	0.321429	0
P52292	P52292	Importin subunit alpha-1	KPNA2	Long-Short	0.0288821	0.374984	0.0770222	4	0.942305	0.992421	NA	0.309524	0
P52597	P52597	Heterogeneous nuclear ribonucleoprotein F;Heterogeneous nuclear ribonucleoprotein F, N-terminally processed	HNRNPF	Long-Short	0.138497	0.429801	0.322236	6	0.758206	0.992421	NA	0.393939	0
P53396	P53396	ATP-citrate synthase	ACLY	Long-Short	0.217451	0.0305833	7.11012	1	0.0889536	0.992421	NA	0.5	0
P53618	P53618	Coatomer subunit beta	COPB1	Long-Short	0.0600761	0.6891	0.0871805	4	0.934718	0.992421	NA	0.291667	0
P53621	P53621	Coatomer subunit alpha;Xenin;Proxenin	COPA	Long-Short	0.118765	0.2347	0.506028	4	0.639452	0.992421	NA	0.208333	0
P53985	P53985	Monocarboxylate transporter 1	SLC16A1	Long-Short	0.773857	0.45825	1.68872	3	0.189856	0.992421	NA	0.388889	0
P53992	P53992	Protein transport protein Sec24C	SEC24C	Long-Short	-0.127483	0.445662	-0.286052	3	0.793454	0.992421	NA	0.166667	0
P54136	P54136	Arginine--tRNA ligase, cytoplasmic	RARS	Long-Short	0.317536	0.216192	1.46877	4	0.215821	0.992421	NA	0.166667	0
P54886	P54886	Delta-1-pyrroline-5-carboxylate synthase;Glutamate 5-kinase;Gamma-glutamyl phosphate reductase	ALDH18A1	Long-Short	0.266327	0.340328	0.782558	4	0.477621	0.992421	NA	0.212121	0
P55060	P55060	Exportin-2	CSE1L	Long-Short	-0.0562769	0.419693	-0.134091	1	0.915141	0.992421	NA	0.5	0
P55084	P55084	Trifunctional enzyme subunit beta, mitochondrial;3-ketoacyl-CoA thiolase	HADHB	Long-Short	0.971478	0.584854	1.66106	2	0.238584	0.992421	NA	0.5	0
P55795	P55795	Heterogeneous nuclear ribonucleoprotein H2	HNRNPH2	Long-Short	0.492706	0.639821	0.770068	1	0.582237	0.992421	NA	0.5	0
P55884	P55884	Eukaryotic translation initiation factor 3 subunit B	EIF3B	Long-Short	0.268544	0.276147	0.97247	5	0.37548	0.992421	NA	0.583333	0
P56192	P56192	Methionine--tRNA ligase, cytoplasmic	MARS	Long-Short	-0.141753	0.304058	-0.466205	4	0.665325	0.992421	NA	0.222222	0
P56537	P56537	Eukaryotic translation initiation factor 6	EIF6	Long-Short	0.375935	NA	NA	0	NA	NA	NA	0.666667	0
P57088	P57088	Transmembrane protein 33	TMEM33	Long-Short	0.532074	0.274255	1.94007	4	0.124368	0.992421	NA	0	0
P57678	P57678	Gem-associated protein 4	GEMIN4	Long-Short	0.605545	0.313449	1.93188	1	0.304083	0.992421	NA	0.5	0
P60228	P60228	Eukaryotic translation initiation factor 3 subunit E	EIF3E	Long-Short	-0.158483	0.556473	-0.284798	3	0.794327	0.992421	NA	0.444444	0
P60842;Q14240	P60842	Eukaryotic initiation factor 4A-I	EIF4A1	Long-Short	0.0711175	0.521875	0.136273	6	0.896063	0.992421	NA	0.21875	0
P61247	P61247	40S ribosomal protein S3a	RPS3A	Long-Short	0.276202	0.3779	0.730886	5	0.497645	0.992421	NA	0.344444	0
P61254;Q9UNX3	P61254	60S ribosomal protein L26;60S ribosomal protein L26-like 1	RPL26;RPL26L1	Long-Short	0.378924	0.394655	0.96014	6	0.374062	0.992421	NA	0.238095	0
P61313	P61313	60S ribosomal protein L15	RPL15	Long-Short	0.230968	0.305437	0.75619	5	0.48362	0.992421	NA	0.190476	0
P61353	P61353	60S ribosomal protein L27	RPL27	Long-Short	0.154153	0.800587	0.19255	5	0.854888	0.992421	NA	0.3	0
P61956;P55854;Q6EEV6	P61956	Small ubiquitin-related modifier 2;Small ubiquitin-related modifier 3;Small ubiquitin-related modifier 4	SUMO2;SUMO3;SUMO4	Long-Short	0.567953	0.280502	2.02477	1	0.292045	0.992421	NA	0.5	0
P61978	P61978	Heterogeneous nuclear ribonucleoprotein K	HNRNPK	Long-Short	0.0663465	0.45685	0.145226	6	0.889288	0.992421	NA	0.298246	0
P62081	P62081	40S ribosomal protein S7	RPS7	Long-Short	0.284547	0.472578	0.602116	4	0.579563	0.992421	NA	0.25	0
P62241	P62241	40S ribosomal protein S8	RPS8	Long-Short	0.0838875	0.530417	0.158154	6	0.879524	0.992421	NA	0.28125	0
P62244	P62244	40S ribosomal protein S15a	RPS15A	Long-Short	-0.328833	0.350792	-0.9374	2	0.447509	0.992421	NA	0.5	0
P62249	P62249	40S ribosomal protein S16	RPS16	Long-Short	0.697314	0.541338	1.28813	2	0.326617	0.992421	NA	0.333333	0
P62263	P62263	40S ribosomal protein S14	RPS14	Long-Short	-0.0123453	0.346157	-0.0356641	4	0.973259	0.992421	NA	0.277778	0
P62266	P62266	40S ribosomal protein S23	RPS23	Long-Short	0.183135	0.492293	0.372005	4	0.728758	0.992421	NA	0.222222	0
P62277	P62277	40S ribosomal protein S13	RPS13	Long-Short	0.201668	1.19345	0.168979	1	0.893431	0.992421	NA	0.5	0
P62280	P62280	40S ribosomal protein S11	RPS11	Long-Short	0.185145	0.283347	0.653421	5	0.542336	0.992421	NA	0.222222	0
P62424	P62424	60S ribosomal protein L7a	RPL7A	Long-Short	0.217961	0.713416	0.305517	6	0.770294	0.992421	NA	0.153846	0
P62495	P62495	Eukaryotic peptide chain release factor subunit 1	ETF1	Long-Short	0.0684585	0.302449	0.226347	5	0.829894	0.992421	NA	0	0
P62701;Q8TD47;P22090	P62701	40S ribosomal protein S4, X isoform	RPS4X	Long-Short	0.394039	0.497332	0.792305	5	0.464098	0.992421	NA	0.316667	0
P62750	P62750	60S ribosomal protein L23a	RPL23A	Long-Short	0.341177	0.427087	0.798846	3	0.482776	0.992421	NA	0.333333	0
P62753	P62753	40S ribosomal protein S6	RPS6	Long-Short	0.344009	0.290941	1.1824	6	0.281775	0.992421	NA	0.272727	0
P62826	P62826	GTP-binding nuclear protein Ran	RAN	Long-Short	0.1785	0.181667	0.982567	4	0.381451	0.992421	NA	0.166667	0
P62829	P62829	60S ribosomal protein L23	RPL23	Long-Short	0.0768086	0.361882	0.212248	4	0.842291	0.992421	NA	0.333333	0
P62847	P62847	40S ribosomal protein S24	RPS24	Long-Short	0.327746	0.757395	0.432728	6	0.680334	0.992421	NA	0	0
P62854;Q5JNZ5	P62854	40S ribosomal protein S26;Putative 40S ribosomal protein S26-like 1	RPS26;RPS26P11	Long-Short	0.139652	0.526481	0.265255	3	0.807995	0.992421	NA	0.333333	0
P62888	P62888	60S ribosomal protein L30	RPL30	Long-Short	0.457544	0.527047	0.868127	4	0.434306	0.992421	NA	0.5	0
P62899	P62899	60S ribosomal protein L31	RPL31	Long-Short	0.0603423	0.26215	0.230182	2	0.839351	0.992421	NA	0.5	0
P62906	P62906	60S ribosomal protein L10a	RPL10A	Long-Short	-0.135505	0.817101	-0.165836	5	0.874783	0.992421	NA	0.2	0
P62910	P62910	60S ribosomal protein L32	RPL32	Long-Short	0.122178	1.39549	0.0875523	1	0.944404	0.992421	NA	0.5	0
P62913	P62913	60S ribosomal protein L11	RPL11	Long-Short	-0.179902	0.371149	-0.484716	5	0.648366	0.992421	NA	0.125	0
P62917	P62917	60S ribosomal protein L8	RPL8	Long-Short	0.347315	0.664021	0.523048	6	0.619686	0.992421	NA	0.203704	0
P63010;Q10567	P63010	AP-2 complex subunit beta;AP-1 complex subunit beta-1	AP2B1;AP1B1	Long-Short	-1.09254	0.666177	-1.64002	4	0.176344	0.992421	NA	0.416667	0
P63173	P63173	60S ribosomal protein L38	RPL38	Long-Short	0.86278	0.162015	5.32532	1	0.11817	0.992421	NA	0.5	0
P63244	P63244	Guanine nucleotide-binding protein subunit beta-2-like 1;Guanine nucleotide-binding protein subunit beta-2-like 1, N-terminally processed	GNB2L1	Long-Short	0.0632372	0.73149	0.0864498	5	0.934464	0.992421	NA	0.333333	0
P63261	P63261	Actin, cytoplasmic 2;Actin, cytoplasmic 2, N-terminally processed	ACTG1	Long-Short	0.387291	0.597808	0.647852	2	0.58352	0.992421	NA	0.333333	0
P67809	P67809	Nuclease-sensitive element-binding protein 1	YBX1	Long-Short	0.563122	0.467919	1.20346	4	0.295151	0.992421	NA	0.416667	0
P68104;Q5VTE0	P68104	Elongation factor 1-alpha 1;Putative elongation factor 1-alpha-like 3	EEF1A1;EEF1A1P5	Long-Short	0.0856149	0.576932	0.148397	5	0.887829	0.992421	NA	0.181818	0
P68371;Q3ZCM7	P68371	Tubulin beta-4B chain	TUBB4B	Long-Short	-0.213431	0.298813	-0.714261	5	0.507015	0.992421	NA	0.25	0
P68400;Q8NEV1	P68400	Casein kinase II subunit alpha;Casein kinase II subunit alpha 3	CSNK2A1;CSNK2A3	Long-Short	0.276141	0.273944	1.00802	4	0.370472	0.992421	NA	0.25	0
P68431;P84243;Q71DI3;Q16695;Q6NXT2	P68431	Histone H3.1;Histone H3.3;Histone H3.2;Histone H3.1t;Histone H3.3C	HIST1H3A;H3F3A;HIST2H3A;HIST3H3;H3F3C	Long-Short	-0.617866	NA	NA	0	NA	NA	NA	0.666667	0
P78344	P78344	Eukaryotic translation initiation factor 4 gamma 2	EIF4G2	Long-Short	-0.023529	0.289699	-0.0812189	4	0.939169	0.992421	NA	0.277778	0
P78371	P78371	T-complex protein 1 subunit beta	CCT2	Long-Short	0.166093	0.823162	0.201775	3	0.853	0.992421	NA	0.555556	0
P78527	P78527	DNA-dependent protein kinase catalytic subunit	PRKDC	Long-Short	0.126881	0.259041	0.489809	4	0.649918	0.992421	NA	0.311594	0
P81605	P81605	Dermcidin;Survival-promoting peptide;DCD-1	DCD	Long-Short	Inf	NA	NA	NA	NA	0	oneConditionMissing	0.666667	0
P82650	P82650	28S ribosomal protein S22, mitochondrial	MRPS22	Long-Short	0.591135	0.480292	1.23078	1	0.434373	0.992421	NA	0.5	0
P82675	P82675	28S ribosomal protein S5, mitochondrial	MRPS5	Long-Short	0.0208133	0.558439	0.0372706	4	0.972055	0.992421	NA	0.333333	0
P83731	P83731	60S ribosomal protein L24	RPL24	Long-Short	0.277873	0.548563	0.506547	5	0.634013	0.992421	NA	0.309524	0
P84098	P84098	60S ribosomal protein L19	RPL19	Long-Short	-0.135717	0.17481	-0.776366	4	0.480883	0.992421	NA	0.111111	0
P84103	P84103	Serine/arginine-rich splicing factor 3	SRSF3	Long-Short	-0.0180632	0.218496	-0.0826707	2	0.941643	0.992421	NA	0.333333	0
Q00325	Q00325	Phosphate carrier protein, mitochondrial	SLC25A3	Long-Short	0.119016	0.452268	0.263153	4	0.805432	0.992421	NA	0.222222	0
Q00341	Q00341	Vigilin	HDLBP	Long-Short	0.565178	0.263054	2.14853	1	0.277321	0.992421	NA	0.5	0
Q00610;P53675	Q00610	Clathrin heavy chain 1	CLTC	Long-Short	0.146032	0.300337	0.486225	5	0.647368	0.992421	NA	0.229167	0
Q00839	Q00839	Heterogeneous nuclear ribonucleoprotein U	HNRNPU	Long-Short	-0.0118159	0.576056	-0.0205117	6	0.9843	0.992421	NA	0.285714	0
Q01081;P0DN76	Q01081	Splicing factor U2AF 35 kDa subunit	U2AF1	Long-Short	#NAME?	NA	NA	NA	NA	0	oneConditionMissing	0.833333	0
Q01085	Q01085	Nucleolysin TIAR	TIAL1	Long-Short	-0.486593	0.811772	-0.599421	2	0.609753	0.992421	NA	0.5	0
Q01780	Q01780	Exosome component 10	EXOSC10	Long-Short	0.17778	0.421138	0.422142	5	0.690459	0.992421	NA	0.277778	0
Q01813	Q01813	ATP-dependent 6-phosphofructokinase, platelet type	PFKP	Long-Short	-0.169214	0.445015	-0.380244	4	0.723093	0.992421	NA	0.5	0
Q01844	Q01844	RNA-binding protein EWS	EWSR1	Long-Short	-0.303458	0.756036	-0.40138	4	0.708659	0.992421	NA	0.333333	0
Q02543	Q02543	60S ribosomal protein L18a	RPL18A	Long-Short	0.308345	0.479633	0.642876	4	0.555303	0.992421	NA	0.333333	0
Q02878	Q02878	60S ribosomal protein L6	RPL6	Long-Short	0.0876101	0.440297	0.19898	6	0.84885	0.992421	NA	0.527778	0
Q04637;O43432	Q04637	Eukaryotic translation initiation factor 4 gamma 1	EIF4G1	Long-Short	-0.345862	0.188501	-1.83481	2	0.207965	0.992421	NA	0.333333	0
Q06210;O94808	Q06210	Glutamine--fructose-6-phosphate aminotransferase [isomerizing] 1	GFPT1	Long-Short	-1.18055	0.432066	-2.73234	1	0.223355	0.992421	NA	0.5	0
Q06830;Q13162;P32119	Q06830	Peroxiredoxin-1	PRDX1	Long-Short	-0.134367	0.306466	-0.438439	6	0.676414	0.992421	NA	0.333333	0
Q07020	Q07020	60S ribosomal protein L18	RPL18	Long-Short	0.0296379	0.244816	0.121062	6	0.907594	0.992421	NA	0.1875	0
Q07666;Q5VWX1	Q07666	KH domain-containing, RNA-binding, signal transduction-associated protein 1	KHDRBS1	Long-Short	0.753687	0.553911	1.36066	6	0.222511	0.992421	NA	0.5	0
Q07955	Q07955	Serine/arginine-rich splicing factor 1	SRSF1	Long-Short	-0.0176318	0.861981	-0.020455	3	0.984965	0.992421	NA	0.5	0
Q08211	Q08211	ATP-dependent RNA helicase A	DHX9	Long-Short	-0.156538	0.6543	-0.239245	6	0.818878	0.992421	NA	0.301075	0
Q08945	Q08945	FACT complex subunit SSRP1	SSRP1	Long-Short	-0.477538	0.919652	-0.51926	1	0.6951	0.992421	NA	0.5	0
Q10570	Q10570	Cleavage and polyadenylation specificity factor subunit 1	CPSF1	Long-Short	0.255764	0.517677	0.494061	3	0.655175	0.992421	NA	0.416667	0
Q12769	Q12769	Nuclear pore complex protein Nup160	NUP160	Long-Short	-0.0553548	0.463174	-0.119512	2	0.915792	0.992421	NA	0.333333	0
Q12788	Q12788	Transducin beta-like protein 3	TBL3	Long-Short	-0.15509	0.772305	-0.200814	3	0.853688	0.992421	NA	0.416667	0
Q12834	Q12834	Cell division cycle protein 20 homolog	CDC20	Long-Short	1.66027	1.17636	1.41136	2	0.293607	0.992421	NA	0.333333	0
Q12906	Q12906	Interleukin enhancer-binding factor 3	ILF3	Long-Short	0.020057	0.61273	0.0327338	4	0.975455	0.992421	NA	0.666667	0
Q12931	Q12931	Heat shock protein 75 kDa, mitochondrial	TRAP1	Long-Short	0.117635	0.425892	0.276208	5	0.793442	0.992421	NA	0.25	0
Q13045	Q13045	Protein flightless-1 homolog	FLII	Long-Short	0.142369	0.420937	0.33822	4	0.752204	0.992421	NA	0.222222	0
Q13148	Q13148	TAR DNA-binding protein 43	TARDBP	Long-Short	-0.0960608	0.489781	-0.19613	6	0.850982	0.992421	NA	0.309524	0
Q13151	Q13151	Heterogeneous nuclear ribonucleoprotein A0	HNRNPA0	Long-Short	0.187052	0.711739	0.262809	4	0.805679	0.992421	NA	0.285714	0
Q13200	Q13200	26S proteasome non-ATPase regulatory subunit 2	PSMD2	Long-Short	-0.138888	0.237549	-0.584671	4	0.590158	0.992421	NA	0.277778	0
Q13242	Q13242	Serine/arginine-rich splicing factor 9	SRSF9	Long-Short	0.342774	0.112527	3.04615	2	0.092983	0.992421	NA	0.5	0
Q13247;Q08170;Q13243	Q13247	Serine/arginine-rich splicing factor 6;Serine/arginine-rich splicing factor 4	SRSF6;SRSF4	Long-Short	0.468093	0.398343	1.1751	2	0.360911	0.992421	NA	0.666667	0
Q13263	Q13263	Transcription intermediary factor 1-beta	TRIM28	Long-Short	0.417003	0.383272	1.08801	3	0.356188	0.992421	NA	0.5	0
Q13347	Q13347	Eukaryotic translation initiation factor 3 subunit I	EIF3I	Long-Short	0.26585	0.408184	0.651298	4	0.550378	0.992421	NA	0.333333	0
Q13435	Q13435	Splicing factor 3B subunit 2	SF3B2	Long-Short	-0.0399138	0.451497	-0.0884033	4	0.933805	0.992421	NA	0.166667	0
Q13509	Q13509	Tubulin beta-3 chain	TUBB3	Long-Short	-0.0921927	0.363507	-0.25362	4	0.812292	0.992421	NA	0.333333	0
Q13573	Q13573	SNW domain-containing protein 1	SNW1	Long-Short	-0.16148	0.442544	-0.364891	1	0.77726	0.992421	NA	0.5	0
Q13595	Q13595	Transformer-2 protein homolog alpha	TRA2A	Long-Short	-0.375653	NA	NA	0	NA	NA	NA	0.666667	0
Q13823	Q13823	Nucleolar GTP-binding protein 2	GNL2	Long-Short	0.183946	0.520686	0.353276	4	0.741714	0.992421	NA	0.466667	0
Q13885;Q9BVA1	Q13885	Tubulin beta-2A chain;Tubulin beta-2B chain	TUBB2A;TUBB2B	Long-Short	0.644134	NA	NA	0	NA	NA	NA	0.666667	0
Q14103	Q14103	Heterogeneous nuclear ribonucleoprotein D0	HNRNPD	Long-Short	0.02111	0.190388	0.110879	2	0.921837	0.992421	NA	0.333333	0
Q14137	Q14137	Ribosome biogenesis protein BOP1	BOP1	Long-Short	-0.421131	0.800663	-0.525978	3	0.635308	0.992421	NA	0.5	0
Q14152	Q14152	Eukaryotic translation initiation factor 3 subunit A	EIF3A	Long-Short	0.0899112	0.358299	0.250939	5	0.811847	0.992421	NA	0.322917	0
Q14166	Q14166	Tubulin--tyrosine ligase-like protein 12	TTLL12	Long-Short	0.703065	1.30411	0.539115	1	0.685225	0.992421	NA	0.5	0
Q14498	Q14498	RNA-binding protein 39	RBM39	Long-Short	#NAME?	NA	NA	NA	NA	0	oneConditionMissing	0.833333	0
Q14527	Q14527	Helicase-like transcription factor	HLTF	Long-Short	-0.0172552	0.843454	-0.0204578	3	0.984963	0.992421	NA	0.333333	0
Q14566	Q14566	DNA replication licensing factor MCM6	MCM6	Long-Short	0.184555	0.274489	0.672361	4	0.538195	0.992421	NA	0.111111	0
Q14669	Q14669	E3 ubiquitin-protein ligase TRIP12	TRIP12	Long-Short	-0.480501	0.366671	-1.31044	4	0.260226	0.992421	NA	0.4	0
Q14684	Q14684	Ribosomal RNA processing protein 1 homolog B	RRP1B	Long-Short	0.0384157	0.529306	0.0725775	4	0.945627	0.992421	NA	0.291667	0
Q14690	Q14690	Protein RRP5 homolog	PDCD11	Long-Short	-0.369368	0.336373	-1.09809	5	0.322208	0.992421	NA	0.444444	0
Q14694	Q14694	Ubiquitin carboxyl-terminal hydrolase 10	USP10	Long-Short	0.244644	0.537625	0.455046	3	0.679988	0.992421	NA	0.5	0
Q14697	Q14697	Neutral alpha-glucosidase AB	GANAB	Long-Short	-0.0267052	0.322498	-0.0828074	5	0.937218	0.992421	NA	0.466667	0
Q14739	Q14739	Lamin-B receptor	LBR	Long-Short	-0.13869	0.259869	-0.533692	4	0.621833	0.992421	NA	0.25	0
Q14807	Q14807	Kinesin-like protein KIF22	KIF22	Long-Short	0.315781	0.344208	0.917416	3	0.426579	0.992421	NA	0.452381	0
Q14839;Q8TDI0;Q12873	Q14839	Chromodomain-helicase-DNA-binding protein 4	CHD4	Long-Short	-0.0116946	0.336947	-0.0347074	3	0.974493	0.992421	NA	0.333333	0
Q14974	Q14974	Importin subunit beta-1	KPNB1	Long-Short	0.826489	0.0539051	15.3323	2	0.00422694	0.992421	NA	0.333333	0
Q14980	Q14980	Nuclear mitotic apparatus protein 1	NUMA1	Long-Short	-0.113649	0.737216	-0.15416	6	0.882538	0.992421	NA	0.333333	0
Q15029	Q15029	116 kDa U5 small nuclear ribonucleoprotein component	EFTUD2	Long-Short	0.202487	0.265272	0.763319	3	0.500811	0.992421	NA	0.5	0
Q15046	Q15046	Lysine--tRNA ligase	KARS	Long-Short	-0.402796	0.435653	-0.924581	4	0.407513	0.992421	NA	0.333333	0
Q15084	Q15084	Protein disulfide-isomerase A6	PDIA6	Long-Short	-0.586985	0.776709	-0.755733	1	0.588005	0.992421	NA	0.5	0
Q15149;P58107;Q9UPN3	Q15149	Plectin	PLEC	Long-Short	0.0279351	0.251238	0.11119	4	0.916822	0.992421	NA	0.319444	0
Q15233	Q15233	Non-POU domain-containing octamer-binding protein	NONO	Long-Short	0.121185	0.456645	0.265381	6	0.799598	0.992421	NA	0.262821	0
Q15269	Q15269	Periodic tryptophan protein 2 homolog	PWP2	Long-Short	0.181861	0.765238	0.237653	2	0.834278	0.992421	NA	0.416667	0
Q15365	Q15365	Poly(rC)-binding protein 1	PCBP1	Long-Short	0.355548	0.737099	0.482361	6	0.646642	0.992421	NA	0.25	0
Q15366;P57721	Q15366	Poly(rC)-binding protein 2;Poly(rC)-binding protein 3	PCBP2;PCBP3	Long-Short	0.51688	0.640338	0.807198	6	0.450358	0.992421	NA	0.458333	0
Q15393	Q15393	Splicing factor 3B subunit 3	SF3B3	Long-Short	0.816224	0.453029	1.8017	2	0.213383	0.992421	NA	0.333333	0
Q15417	Q15417	Calponin-3	CNN3	Long-Short	-0.0321941	0.203877	-0.15791	1	0.900295	0.992421	NA	0.5	0
Q15555	Q15555	Microtubule-associated protein RP/EB family member 2	MAPRE2	Long-Short	0.27119	0.911625	0.297479	2	0.794155	0.992421	NA	0.333333	0
Q15637	Q15637	Splicing factor 1	SF1	Long-Short	0.422902	0.248383	1.70262	1	0.338078	0.992421	NA	0.666667	0
Q15717;Q12926;P26378	Q15717	ELAV-like protein 1	ELAVL1	Long-Short	-0.224185	0.233295	-0.960949	6	0.373687	0.992421	NA	0.5625	0
Q15758	Q15758	Neutral amino acid transporter B(0)	SLC1A5	Long-Short	-0.199378	0.177304	-1.1245	1	0.462736	0.992421	NA	0.5	0
Q15843	Q15843	NEDD8	NEDD8	Long-Short	-0.284691	0.154614	-1.84131	1	0.316734	0.992421	NA	0.5	0
Q16629	Q16629	Serine/arginine-rich splicing factor 7	SRSF7	Long-Short	-0.161058	0.393606	-0.409188	3	0.709862	0.992421	NA	0.433333	0
Q16630	Q16630	Cleavage and polyadenylation specificity factor subunit 6	CPSF6	Long-Short	-0.704364	0.360155	-1.95572	2	0.189665	0.992421	NA	0.75	0
Q16658	Q16658	Fascin	FSCN1	Long-Short	0.177841	0.296571	0.599656	2	0.609623	0.992421	NA	0.333333	0
Q29RF7	Q29RF7	Sister chromatid cohesion protein PDS5 homolog A	PDS5A	Long-Short	0.14445	0.408126	0.353935	4	0.741256	0.992421	NA	0.375	0
Q3ZCQ8	Q3ZCQ8	Mitochondrial import inner membrane translocase subunit TIM50	TIMM50	Long-Short	-0.0883056	0.239386	-0.368883	1	0.77502	0.992421	NA	0.5	0
Q58FF8	Q58FF8	Putative heat shock protein HSP 90-beta 2	HSP90AB2P	Long-Short	0.0821875	1.62166	0.0506811	2	0.964186	0.992421	NA	0.333333	0
Q5BKZ1	Q5BKZ1	DBIRD complex subunit ZNF326	ZNF326	Long-Short	-0.112674	0.313941	-0.358902	5	0.734326	0.992421	NA	0.233333	0
Q5JVF3	Q5JVF3	PCI domain-containing protein 2	PCID2	Long-Short	0.26294	0.283034	0.929006	4	0.405472	0.992421	NA	0.388889	0
Q5SSJ5	Q5SSJ5	Heterochromatin protein 1-binding protein 3	HP1BP3	Long-Short	0.201029	0.328486	0.611988	5	0.567302	0.992421	NA	0.333333	0
Q5T9A4	Q5T9A4	ATPase family AAA domain-containing protein 3B	ATAD3B	Long-Short	0.702662	0.389208	1.80536	4	0.145329	0.992421	NA	0.333333	0
Q5VVJ2	Q5VVJ2	Histone H2A deubiquitinase MYSM1	MYSM1	Long-Short	-1.70127	1.55816	-1.09184	2	0.388888	0.992421	NA	0.333333	0
Q68CQ4	Q68CQ4	Digestive organ expansion factor homolog	DIEXF	Long-Short	0.206637	0.0519511	3.97753	1	0.156804	0.992421	NA	0.5	0
Q68D10	Q68D10	Protein SPT2 homolog	SPTY2D1	Long-Short	-0.616496	0.146758	-4.20076	1	0.14878	0.992421	NA	0.5	0
Q6P2Q9	Q6P2Q9	Pre-mRNA-processing-splicing factor 8	PRPF8	Long-Short	-0.127907	0.341296	-0.374767	4	0.726857	0.992421	NA	0.375	0
Q6P5R6	Q6P5R6	60S ribosomal protein L22-like 1	RPL22L1	Long-Short	-0.0965479	0.325574	-0.296547	2	0.794773	0.992421	NA	0.583333	0
Q6RFH5	Q6RFH5	WD repeat-containing protein 74	WDR74	Long-Short	0.218111	0.231388	0.942619	1	0.518799	0.992421	NA	0.5	0
Q7KZF4	Q7KZF4	Staphylococcal nuclease domain-containing protein 1	SND1	Long-Short	-0.0711603	0.354654	-0.200647	4	0.850764	0.992421	NA	0.277778	0
Q7KZI7	Q7KZI7	Serine/threonine-protein kinase MARK2	MARK2	Long-Short	0.16125	0.373031	0.432269	2	0.70769	0.992421	NA	0.444444	0
Q7L014	Q7L014	Probable ATP-dependent RNA helicase DDX46	DDX46	Long-Short	-0.107075	0.343122	-0.312062	5	0.767587	0.992421	NA	0.5	0
Q7L0Y3	Q7L0Y3	Mitochondrial ribonuclease P protein 1	TRMT10C	Long-Short	-0.390404	0.0120631	-32.3636	1	0.0196646	0.992421	NA	0.5	0
Q7L2E3	Q7L2E3	Putative ATP-dependent RNA helicase DHX30	DHX30	Long-Short	0.216319	0.251714	0.859386	4	0.438581	0.992421	NA	0.266667	0
Q7L2H7	Q7L2H7	Eukaryotic translation initiation factor 3 subunit M	EIF3M	Long-Short	-0.331669	0.111129	-2.98454	1	0.205822	0.992421	NA	0.5	0
Q7Z2W4	Q7Z2W4	Zinc finger CCCH-type antiviral protein 1	ZC3HAV1	Long-Short	0.121634	0.27406	0.443823	5	0.675719	0.992421	NA	0.366667	0
Q7Z417	Q7Z417	Nuclear fragile X mental retardation-interacting protein 2	NUFIP2	Long-Short	0.274386	0.443858	0.618183	1	0.647515	0.992421	NA	0.5	0
Q7Z739	Q7Z739	YTH domain-containing family protein 3	YTHDF3	Long-Short	0.551372	0.354482	1.55543	3	0.217691	0.992421	NA	0.333333	0
Q86VP6;O75155	Q86VP6	Cullin-associated NEDD8-dissociated protein 1	CAND1	Long-Short	-0.391803	1.19079	-0.329028	1	0.797637	0.992421	NA	0.5	0
Q86Y07	Q86Y07	Serine/threonine-protein kinase VRK2	VRK2	Long-Short	1.45052	0.0334933	43.3077	1	0.0146973	0.992421	NA	0.5	0
Q86YP4;Q8WXI9	Q86YP4	Transcriptional repressor p66-alpha	GATAD2A	Long-Short	0.280607	0.270153	1.0387	2	0.408041	0.992421	NA	0.333333	0
Q8IVT2	Q8IVT2	Mitotic interactor and substrate of PLK1	MISP	Long-Short	-0.474607	0.138052	-3.4379	1	0.180205	0.992421	NA	0.5	0
Q8IXT5	Q8IXT5	RNA-binding protein 12B	RBM12B	Long-Short	0.0524031	0.315414	0.166141	5	0.874556	0.992421	NA	0.240741	0
Q8IY37	Q8IY37	Probable ATP-dependent RNA helicase DHX37	DHX37	Long-Short	-0.0561233	0.127872	-0.438903	4	0.683398	0.992421	NA	0.366667	0
Q8IY81	Q8IY81	pre-rRNA processing protein FTSJ3	FTSJ3	Long-Short	-0.0271882	0.386416	-0.07036	4	0.947284	0.992421	NA	0.444444	0
Q8N163	Q8N163	Cell cycle and apoptosis regulator protein 2	CCAR2	Long-Short	0.203479	0.132958	1.5304	4	0.200663	0.992421	NA	0.181818	0
Q8N1F7	Q8N1F7	Nuclear pore complex protein Nup93	NUP93	Long-Short	-0.0164621	0.416229	-0.0395505	4	0.970347	0.992421	NA	0.333333	0
Q8N5G2	Q8N5G2	Macoilin	TMEM57	Long-Short	0.502836	0.508721	0.988433	1	0.503703	0.992421	NA	0.5	0
Q8N7H5	Q8N7H5	RNA polymerase II-associated factor 1 homolog	PAF1	Long-Short	-0.390661	0.558576	-0.699387	2	0.556705	0.992421	NA	0.333333	0
Q8NC51	Q8NC51	Plasminogen activator inhibitor 1 RNA-binding protein	SERBP1	Long-Short	-0.474282	0.631255	-0.751332	4	0.494241	0.992421	NA	0.5	0
Q8NCA5	Q8NCA5	Protein FAM98A	FAM98A	Long-Short	NA	NA	NA	NA	NA	NA	completeMissing	1	0
Q8NDV3	Q8NDV3	Structural maintenance of chromosomes protein 1B	SMC1B	Long-Short	0.390994	1.18718	0.329348	1	0.797454	0.992421	NA	0.5	0
Q8NE71	Q8NE71	ATP-binding cassette sub-family F member 1	ABCF1	Long-Short	0.166915	0.387909	0.430293	4	0.689152	0.992421	NA	0.333333	0
Q8NHH1	Q8NHH1	Tubulin polyglutamylase TTLL11	TTLL11	Long-Short	-1.37645	0.979956	-1.40461	1	0.393874	0.992421	NA	0.5	0
Q8NI27	Q8NI27	THO complex subunit 2	THOC2	Long-Short	0.167719	0.361879	0.463467	4	0.667126	0.992421	NA	0.25	0
Q8NI36	Q8NI36	WD repeat-containing protein 36	WDR36	Long-Short	-0.437428	0.665704	-0.657091	2	0.578629	0.992421	NA	0.5	0
Q8TDD1	Q8TDD1	ATP-dependent RNA helicase DDX54	DDX54	Long-Short	-0.18694	0.319436	-0.585217	3	0.59951	0.992421	NA	0.472222	0
Q8TDN6	Q8TDN6	Ribosome biogenesis protein BRX1 homolog	BRIX1	Long-Short	-0.138745	0.758741	-0.182862	2	0.871765	0.992421	NA	0.333333	0
Q8TEQ6	Q8TEQ6	Gem-associated protein 5	GEMIN5	Long-Short	0.165808	0.657135	0.25232	4	0.813229	0.992421	NA	0.444444	0
Q8WTT2	Q8WTT2	Nucleolar complex protein 3 homolog	NOC3L	Long-Short	0.268756	0.887136	0.302947	1	0.812733	0.992421	NA	0.5	0
Q8WUH6	Q8WUH6	Transmembrane protein 263	TMEM263	Long-Short	0.2921	1.15158	0.253653	1	0.841855	0.992421	NA	0.5	0
Q8WUM4	Q8WUM4	Programmed cell death 6-interacting protein	PDCD6IP	Long-Short	0.290441	0.586827	0.494935	4	0.646599	0.992421	NA	0.380952	0
Q8WVM0	Q8WVM0	Dimethyladenosine transferase 1, mitochondrial	TFB1M	Long-Short	0.716364	0.786801	0.910477	2	0.458679	0.992421	NA	0.333333	0
Q8WVX9	Q8WVX9	Fatty acyl-CoA reductase 1	FAR1	Long-Short	0.161488	0.352407	0.458244	4	0.670568	0.992421	NA	0.25	0
Q8WWM7	Q8WWM7	Ataxin-2-like protein	ATXN2L	Long-Short	-0.110733	1.08902	-0.101681	2	0.928286	0.992421	NA	0.333333	0
Q8WWY3	Q8WWY3	U4/U6 small nuclear ribonucleoprotein Prp31	PRPF31	Long-Short	0.297822	0.748587	0.397846	3	0.717363	0.992421	NA	0.166667	0
Q8WXF1	Q8WXF1	Paraspeckle component 1	PSPC1	Long-Short	-0.0764808	0.265874	-0.287658	3	0.792335	0.992421	NA	0.166667	0
Q8WYP5	Q8WYP5	Protein ELYS	AHCTF1	Long-Short	-0.0355677	0.376903	-0.0943685	1	0.940101	0.992421	NA	0.5	0
Q92499	Q92499	ATP-dependent RNA helicase DDX1	DDX1	Long-Short	0.305579	0.303497	1.00686	4	0.370966	0.992421	NA	0.5	0
Q92552	Q92552	28S ribosomal protein S27, mitochondrial	MRPS27	Long-Short	0.741224	0.47659	1.55527	2	0.260139	0.992421	NA	0.333333	0
Q92598;P34932	Q92598	Heat shock protein 105 kDa	HSPH1	Long-Short	0.511506	0.499112	1.02483	3	0.38086	0.992421	NA	0.416667	0
Q92621	Q92621	Nuclear pore complex protein Nup205	NUP205	Long-Short	-0.156423	0.510644	-0.306326	2	0.788304	0.992421	NA	0.333333	0
Q92804	Q92804	TATA-binding protein-associated factor 2N	TAF15	Long-Short	0.22712	0.412768	0.550236	6	0.602024	0.992421	NA	0.125	0
Q92841	Q92841	Probable ATP-dependent RNA helicase DDX17	DDX17	Long-Short	0.145907	0.324309	0.449901	6	0.668579	0.992421	NA	0.333333	0
Q92922	Q92922	SWI/SNF complex subunit SMARCC1	SMARCC1	Long-Short	0.0302012	0.18165	0.16626	2	0.88324	0.992421	NA	0.333333	0
Q92925;Q96GM5;Q6STE5	Q92925	SWI/SNF-related matrix-associated actin-dependent regulator of chromatin subfamily D member 2	SMARCD2	Long-Short	0.414574	0.42554	0.974232	4	0.385107	0.992421	NA	0.416667	0
Q92945	Q92945	Far upstream element-binding protein 2	KHSRP	Long-Short	-0.107346	0.611123	-0.175654	6	0.866344	0.992421	NA	0.28125	0
Q93009	Q93009	Ubiquitin carboxyl-terminal hydrolase 7	USP7	Long-Short	0.0200031	0.294355	0.0679558	3	0.950096	0.992421	NA	0.416667	0
Q969S3	Q969S3	Zinc finger protein 622	ZNF622	Long-Short	-0.783865	0.259591	-3.01962	4	0.0391778	0.992421	NA	0.5	0
Q969V3	Q969V3	Nicalin	NCLN	Long-Short	-0.102541	0.644354	-0.159137	4	0.881273	0.992421	NA	0.277778	0
Q96CW1	Q96CW1	AP-2 complex subunit mu	AP2M1	Long-Short	0.187219	0.294373	0.635991	4	0.559351	0.992421	NA	0.222222	0
Q96D46	Q96D46	60S ribosomal export protein NMD3	NMD3	Long-Short	0.0317337	0.208187	0.152428	1	0.903702	0.992421	NA	0.5	0
Q96EK5	Q96EK5	KIF1-binding protein	KIAA1279	Long-Short	0.305688	0.579573	0.527436	3	0.634409	0.992421	NA	0.166667	0
Q96EY1	Q96EY1	DnaJ homolog subfamily A member 3, mitochondrial	DNAJA3	Long-Short	-0.0876266	0.510471	-0.171658	4	0.872041	0.992421	NA	0.291667	0
Q96GQ7	Q96GQ7	Probable ATP-dependent RNA helicase DDX27	DDX27	Long-Short	-0.217452	0.31134	-0.698441	1	0.611866	0.992421	NA	0.5	0
Q96HS1	Q96HS1	Serine/threonine-protein phosphatase PGAM5, mitochondrial	PGAM5	Long-Short	-0.458243	0.599269	-0.764671	1	0.584399	0.992421	NA	0.5	0
Q96I24	Q96I24	Far upstream element-binding protein 3	FUBP3	Long-Short	-0.274156	0.320881	-0.854385	4	0.441043	0.992421	NA	0.7	0
Q96KA5	Q96KA5	Cleft lip and palate transmembrane protein 1-like protein	CLPTM1L	Long-Short	0.026899	0.534088	0.0503644	3	0.962998	0.992421	NA	0.166667	0
Q96MU7	Q96MU7	YTH domain-containing protein 1	YTHDC1	Long-Short	0.701593	0.210133	3.33881	2	0.0791953	0.992421	NA	0.333333	0
Q96P70	Q96P70	Importin-9	IPO9	Long-Short	0.591838	0.408242	1.44972	1	0.384416	0.992421	NA	0.5	0
Q96PK6	Q96PK6	RNA-binding protein 14	RBM14	Long-Short	0.150939	0.324866	0.464618	6	0.658587	0.992421	NA	0.277778	0
Q96RR1	Q96RR1	Twinkle protein, mitochondrial	PEO1	Long-Short	-0.0385633	1.11688	-0.0345275	1	0.978028	0.992421	NA	0.5	0
Q96T37	Q96T37	Putative RNA-binding protein 15	RBM15	Long-Short	0.315058	0.406808	0.774463	4	0.481888	0.992421	NA	0.285714	0
Q99575	Q99575	Ribonucleases P/MRP protein subunit POP1	POP1	Long-Short	-0.209473	0.597317	-0.35069	2	0.759315	0.992421	NA	0.333333	0
Q99613;B5ME19	Q99613	Eukaryotic translation initiation factor 3 subunit C;Eukaryotic translation initiation factor 3 subunit C-like protein	EIF3C;EIF3CL	Long-Short	0.177561	0.434456	0.408696	5	0.699678	0.992421	NA	0.261905	0
Q99623	Q99623	Prohibitin-2	PHB2	Long-Short	0.324722	0.309048	1.05072	5	0.341496	0.992421	NA	0.284314	0
Q99661	Q99661	Kinesin-like protein KIF2C	KIF2C	Long-Short	0.252674	0.245005	1.0313	3	0.37826	0.992421	NA	0.166667	0
Q99832	Q99832	T-complex protein 1 subunit eta	CCT7	Long-Short	0.35281	0.239059	1.47583	4	0.214027	0.992421	NA	0.361111	0
Q99848	Q99848	Probable rRNA-processing protein EBP2	EBNA1BP2	Long-Short	#NAME?	NA	NA	NA	NA	0	oneConditionMissing	0.666667	0
Q9BQ70	Q9BQ70	Transcription factor 25	TCF25	Long-Short	0.257397	0.26386	0.975505	4	0.384546	0.992421	NA	0.259259	0
Q9BQE3	Q9BQE3	Tubulin alpha-1C chain	TUBA1C	Long-Short	-0.950588	0.737528	-1.28888	1	0.420074	0.992421	NA	0.5	0
Q9BQG0	Q9BQG0	Myb-binding protein 1A	MYBBP1A	Long-Short	-0.391791	0.636627	-0.615417	4	0.571569	0.992421	NA	0.25	0
Q9BTE3	Q9BTE3	Mini-chromosome maintenance complex-binding protein	MCMBP	Long-Short	0.614925	0.124868	4.9246	1	0.127539	0.992421	NA	0.5	0
Q9BUF5	Q9BUF5	Tubulin beta-6 chain	TUBB6	Long-Short	-0.312427	0.214911	-1.45375	4	0.219687	0.992421	NA	0.333333	0
Q9BUJ2	Q9BUJ2	Heterogeneous nuclear ribonucleoprotein U-like protein 1	HNRNPUL1	Long-Short	-0.18834	0.60911	-0.309205	4	0.772602	0.992421	NA	0.541667	0
Q9BVP2	Q9BVP2	Guanine nucleotide-binding protein-like 3	GNL3	Long-Short	0.167885	0.197848	0.848553	5	0.434862	0.992421	NA	0.2	0
Q9BXJ9;Q6N069	Q9BXJ9	N-alpha-acetyltransferase 15, NatA auxiliary subunit	NAA15	Long-Short	0.234639	0.632376	0.371044	4	0.729421	0.992421	NA	0.395833	0
Q9BXY0	Q9BXY0	Protein MAK16 homolog	MAK16	Long-Short	Inf	NA	NA	NA	NA	0	oneConditionMissing	0.5	0
Q9BYG3	Q9BYG3	MKI67 FHA domain-interacting nucleolar phosphoprotein	NIFK	Long-Short	0.261875	0.367513	0.712559	3	0.52754	0.992421	NA	0.333333	0
Q9BZE4	Q9BZE4	Nucleolar GTP-binding protein 1	GTPBP4	Long-Short	-0.097812	0.343919	-0.284404	5	0.787503	0.992421	NA	0.35	0
Q9BZF1	Q9BZF1	Oxysterol-binding protein-related protein 8	OSBPL8	Long-Short	-0.149176	0.0966777	-1.54303	2	0.262791	0.992421	NA	0.333333	0
Q9BZJ0	Q9BZJ0	Crooked neck-like protein 1	CRNKL1	Long-Short	-0.0572837	0.248484	-0.230533	3	0.832504	0.992421	NA	0.166667	0
Q9GZR7	Q9GZR7	ATP-dependent RNA helicase DDX24	DDX24	Long-Short	0.0774192	0.55282	0.140044	6	0.893208	0.992421	NA	0.313725	0
Q9H0A0	Q9H0A0	N-acetyltransferase 10	NAT10	Long-Short	0.137602	0.555364	0.247768	6	0.812575	0.992421	NA	0.27193	0
Q9H0D6	Q9H0D6	5-3 exoribonuclease 2	XRN2	Long-Short	-0.197408	0.384973	-0.512784	5	0.629945	0.992421	NA	0.208333	0
Q9H0S4	Q9H0S4	Probable ATP-dependent RNA helicase DDX47	DDX47	Long-Short	0.319006	0.280581	1.13695	5	0.307096	0.992421	NA	0.266667	0
Q9H223	Q9H223	EH domain-containing protein 4	EHD4	Long-Short	0.404919	0.423979	0.955045	3	0.410012	0.992421	NA	0.333333	0
Q9H4L4	Q9H4L4	Sentrin-specific protease 3	SENP3	Long-Short	0.147019	0.356875	0.411962	2	0.720324	0.992421	NA	0.416667	0
Q9H6R0	Q9H6R0	Putative ATP-dependent RNA helicase DHX33	DHX33	Long-Short	-0.365703	0.586027	-0.624039	3	0.576835	0.992421	NA	0.666667	0
Q9H6R4	Q9H6R4	Nucleolar protein 6	NOL6	Long-Short	0.0574312	0.370598	0.154969	4	0.884351	0.992421	NA	0.333333	0
Q9H7B2	Q9H7B2	Ribosome production factor 2 homolog	RPF2	Long-Short	-0.802083	0.541725	-1.48061	1	0.378166	0.992421	NA	0.5	0
Q9H9B4	Q9H9B4	Sideroflexin-1	SFXN1	Long-Short	-0.136011	0.469294	-0.28982	2	0.799239	0.992421	NA	0.333333	0
Q9HCE1	Q9HCE1	Putative helicase MOV-10	MOV10	Long-Short	-0.189105	0.110582	-1.71009	3	0.185778	0.992421	NA	0.333333	0
Q9NQ29	Q9NQ29	Putative RNA-binding protein Luc7-like 1	LUC7L	Long-Short	0.551311	0.577446	0.954741	1	0.514737	0.992421	NA	0.5	0
Q9NQ55	Q9NQ55	Suppressor of SWI4 1 homolog	PPAN	Long-Short	0.0965219	0.30471	0.316766	4	0.767264	0.992421	NA	0.333333	0
Q9NR30	Q9NR30	Nucleolar RNA helicase 2	DDX21	Long-Short	-0.353368	0.346376	-1.02019	5	0.354437	0.992421	NA	0.340278	0
Q9NRG9	Q9NRG9	Aladin	AAAS	Long-Short	-0.651806	0.482104	-1.352	1	0.405425	0.992421	NA	0.5	0
Q9NSD9	Q9NSD9	Phenylalanine--tRNA ligase beta subunit	FARSB	Long-Short	0.424289	0.354522	1.19679	1	0.443122	0.992421	NA	0.5	0
Q9NUQ2	Q9NUQ2	1-acyl-sn-glycerol-3-phosphate acyltransferase epsilon	AGPAT5	Long-Short	0.15372	0.481008	0.31958	4	0.765282	0.992421	NA	0	0
Q9NUQ6	Q9NUQ6	SPATS2-like protein	SPATS2L	Long-Short	0.604528	0.363636	1.66245	5	0.15731	0.992421	NA	0.52381	0
Q9NUU7;Q9UMR2;Q9UHL0	Q9NUU7	ATP-dependent RNA helicase DDX19A;ATP-dependent RNA helicase DDX19B	DDX19A;DDX19B	Long-Short	-0.146343	0.628485	-0.232851	3	0.830859	0.992421	NA	0.166667	0
Q9NVH1	Q9NVH1	DnaJ homolog subfamily C member 11	DNAJC11	Long-Short	0.180375	0.321038	0.561851	3	0.613459	0.992421	NA	0.416667	0
Q9NVI7	Q9NVI7	ATPase family AAA domain-containing protein 3A	ATAD3A	Long-Short	0.620583	0.54941	1.12954	2	0.375921	0.992421	NA	0.333333	0
Q9NVP1	Q9NVP1	ATP-dependent RNA helicase DDX18	DDX18	Long-Short	0.0424758	0.23615	0.179868	5	0.864319	0.992421	NA	0.277778	0
Q9NW13	Q9NW13	RNA-binding protein 28	RBM28	Long-Short	0.277861	0.397562	0.698912	4	0.523112	0.992421	NA	0.333333	0
Q9NWH9	Q9NWH9	SAFB-like transcription modulator	SLTM	Long-Short	-0.236324	0.345102	-0.684796	5	0.52392	0.992421	NA	0.444444	0
Q9NXE4	Q9NXE4	Sphingomyelin phosphodiesterase 4	SMPD4	Long-Short	0.708861	0.12599	5.62634	1	0.111981	0.992421	NA	0.5	0
Q9NY93	Q9NY93	Probable ATP-dependent RNA helicase DDX56	DDX56	Long-Short	0.152274	0.290805	0.523629	3	0.636756	0.992421	NA	0.25	0
Q9NYF8	Q9NYF8	Bcl-2-associated transcription factor 1	BCLAF1	Long-Short	Inf	NA	NA	NA	NA	0	oneConditionMissing	0.666667	0
Q9NZM1	Q9NZM1	Myoferlin	MYOF	Long-Short	-0.0485369	0.618228	-0.0785097	4	0.941193	0.992421	NA	0.416667	0
Q9P0J1	Q9P0J1	[Pyruvate dehydrogenase [acetyl-transferring]]-phosphatase 1, mitochondrial	PDP1	Long-Short	-0.167291	0.285037	-0.586912	1	0.66212	0.992421	NA	0.5	0
Q9P0W8	Q9P0W8	Spermatogenesis-associated protein 7	SPATA7	Long-Short	-1.08701	1.08871	-0.998435	4	0.374573	0.992421	NA	0.166667	0
Q9P258	Q9P258	Protein RCC2	RCC2	Long-Short	0.0505259	NA	NA	0	NA	NA	NA	0.666667	0
Q9P275	Q9P275	Ubiquitin carboxyl-terminal hydrolase 36	USP36	Long-Short	0.466812	0.780107	0.598395	1	0.65671	0.992421	NA	0.5	0
Q9P287	Q9P287	BRCA2 and CDKN1A-interacting protein	BCCIP	Long-Short	-0.0493818	0.480155	-0.102846	2	0.927469	0.992421	NA	0.333333	0
Q9P2E9;Q8N4C6	Q9P2E9	Ribosome-binding protein 1	RRBP1	Long-Short	0.0981441	0.318684	0.307967	6	0.768519	0.992421	NA	0.356061	0
Q9UBU9	Q9UBU9	Nuclear RNA export factor 1	NXF1	Long-Short	-0.0231509	0.166374	-0.13915	2	0.902079	0.992421	NA	0.333333	0
Q9UBX3	Q9UBX3	Mitochondrial dicarboxylate carrier	SLC25A10	Long-Short	-0.462303	0.372818	-1.24002	1	0.432044	0.992421	NA	0.5	0
Q9UG63	Q9UG63	ATP-binding cassette sub-family F member 2	ABCF2	Long-Short	0.281981	0.295781	0.953343	4	0.394402	0.992421	NA	0.21875	0
Q9UHD1	Q9UHD1	Cysteine and histidine-rich domain-containing protein 1	CHORDC1	Long-Short	0.203488	0.756167	0.269105	4	0.80116	0.992421	NA	0.25	0
Q9UHD8	Q9UHD8	Septin-9	40057	Long-Short	-0.398003	0.268365	-1.48307	4	0.212204	0.992421	NA	0.333333	0
Q9UHX1	Q9UHX1	Poly(U)-binding-splicing factor PUF60	PUF60	Long-Short	0.0108184	0.692816	0.0156151	3	0.988522	0.992421	NA	0.444444	0
Q9UIF9	Q9UIF9	Bromodomain adjacent to zinc finger domain protein 2A	BAZ2A	Long-Short	-0.374796	0.460871	-0.813234	4	0.461718	0.992421	NA	0.5	0
Q9UMS4	Q9UMS4	Pre-mRNA-processing factor 19	PRPF19	Long-Short	-0.122207	0.391564	-0.312099	4	0.770557	0.992421	NA	0.388889	0
Q9UN86	Q9UN86	Ras GTPase-activating protein-binding protein 2	G3BP2	Long-Short	#NAME?	NA	NA	NA	NA	0	oneConditionMissing	0.666667	0
Q9UNQ2	Q9UNQ2	Probable dimethyladenosine transferase	DIMT1	Long-Short	0.509981	1.04369	0.488632	1	0.710649	0.992421	NA	0.5	0
Q9UPP1;O75151	Q9UPP1	Histone lysine demethylase PHF8;Lysine-specific demethylase PHF2	PHF8;PHF2	Long-Short	-0.139683	0.946645	-0.147556	1	0.906736	0.992421	NA	0.5	0
Q9Y230	Q9Y230	RuvB-like 2	RUVBL2	Long-Short	-0.322968	0.017015	-18.9814	1	0.0335081	0.992421	NA	0.5	0
Q9Y262	Q9Y262	Eukaryotic translation initiation factor 3 subunit L	EIF3L	Long-Short	0.0765634	0.633521	0.120854	4	0.909634	0.992421	NA	0.208333	0
Q9Y265	Q9Y265	RuvB-like 1	RUVBL1	Long-Short	0.0618496	0.112734	0.548633	2	0.63832	0.992421	NA	0.333333	0
Q9Y285	Q9Y285	Phenylalanine--tRNA ligase alpha subunit	FARSA	Long-Short	0.300183	0.380239	0.789458	4	0.474008	0.992421	NA	0.166667	0
Q9Y2L1	Q9Y2L1	Exosome complex exonuclease RRP44	DIS3	Long-Short	0.967526	1.07734	0.898072	1	0.534154	0.992421	NA	0.5	0
Q9Y2R4	Q9Y2R4	Probable ATP-dependent RNA helicase DDX52	DDX52	Long-Short	0.3683	0.352607	1.0445	4	0.355217	0.992421	NA	0.291667	0
Q9Y2W1	Q9Y2W1	Thyroid hormone receptor-associated protein 3	THRAP3	Long-Short	-0.297527	0.288102	-1.03272	1	0.489755	0.992421	NA	0.5	0
Q9Y2X3	Q9Y2X3	Nucleolar protein 58	NOP58	Long-Short	-0.219524	0.624224	-0.351675	4	0.742826	0.992421	NA	0.444444	0
Q9Y305	Q9Y305	Acyl-coenzyme A thioesterase 9, mitochondrial	ACOT9	Long-Short	-0.29452	0.359841	-0.818473	4	0.459043	0.992421	NA	0	0
Q9Y3I0	Q9Y3I0	tRNA-splicing ligase RtcB homolog	RTCB	Long-Short	0.32736	0.602826	0.543042	3	0.62485	0.992421	NA	0.5	0
Q9Y490	Q9Y490	Talin-1	TLN1	Long-Short	0.0341878	0.783706	0.0436232	2	0.969168	0.992421	NA	0.333333	0
Q9Y4I1	Q9Y4I1	Unconventional myosin-Va	MYO5A	Long-Short	0.0185829	0.495903	0.0374728	1	0.976155	0.992421	NA	0.5	0
Q9Y4P3	Q9Y4P3	Transducin beta-like protein 2	TBL2	Long-Short	0.630284	0.509401	1.2373	1	0.432728	0.992421	NA	0.5	0
Q9Y4W2	Q9Y4W2	Ribosomal biogenesis protein LAS1L	LAS1L	Long-Short	0.448287	1.15213	0.389095	1	0.763769	0.992421	NA	0.5	0
Q9Y5A9	Q9Y5A9	YTH domain-containing family protein 2	YTHDF2	Long-Short	0.319886	0.237293	1.34807	4	0.248919	0.992421	NA	0	0
Q9Y5J1	Q9Y5J1	U3 small nucleolar RNA-associated protein 18 homolog	UTP18	Long-Short	0.176826	1.13342	0.156011	1	0.901475	0.992421	NA	0.5	0
Q9Y678;Q9UBF2	Q9Y678	Coatomer subunit gamma-1	COPG1	Long-Short	0.0585281	0.351435	0.16654	4	0.875811	0.992421	NA	0.261905	0
Q9Y6M1	Q9Y6M1	Insulin-like growth factor 2 mRNA-binding protein 2	IGF2BP2	Long-Short	0.298212	0.361545	0.824827	1	0.560925	0.992421	NA	0.5	0

## Sheet: MSstats_Sample quant
Protein	ProtName	GeneName	Control_C_1	Control_C_2	Control_C_3	Short_S_1	Short_S_2	Short_S_3	Long_L_1	Long_L_2	Long_L_3
O60216;Q9H4I0	Double-strand-break repair protein rad21 homolog	RAD21	NA	NA	NA	20.092	20.8958	21.1479	20.2896	21.6707	21.324
P42212;CON__Q9U6Y5	Green fluorescent protein	GFP	14.3268	NA	NA	26.9331	25.6321	25.5337	26.7216	26.1041	26.0076
Q14683	Structural maintenance of chromosomes protein 1A	SMC1A	NA	NA	NA	21.4023	21.9697	22.2183	21.3318	22.472	22.1781
Q8N3U4-2	Cohesin subunit SA-2 (long)	STAG2	NA	NA	NA	NA	NA	NA	25.7058	25.463	24.738
Q8N3U4;Q9UJ98;Q8TBR4	Cohesin subunit SA-2 (short)	STAG2	NA	NA	NA	26.2229	25.3079	24.5955	22.9393	NA	NA
Q9UQE7	Structural maintenance of chromosomes protein 3	SMC3	NA	NA	NA	21.9221	22.232	22.4325	21.5416	22.8122	22.3289
A0A0B4J1Y9;P0DTE1;A0A0C4DH36;A0A0A0MS15;A0A0B4J1V0;A0A0B4J1V6;A0A075B6Q5;A0A0B4J1X8;P0DP04;P0DP03;P0DP02;A0A0J9YX35;A0A0C4DH32;A0A0B4J1X5;A0A0B4J1V1;A0A0C4DH42;P01764;P01762;P01772;P01780;P01782;P01763;P01766;P01767;P01768	Ig heavy chain V-III region 23;Ig heavy chain V-III region TRO;Ig heavy chain V-III region KOL;Ig heavy chain V-III region JON;Ig heavy chain V-III region DOB;Ig heavy chain V-III region WEA;Ig heavy chain V-III region BRO;Ig heavy chain V-III region BUT;Ig heavy chain V-III region CAM	IGHV3-72;IGHV3-38;IGHV3-49;IGHV3-15;IGHV3-73;IGHV3-64;IGHV3-43;IGHV3-20;IGHV3-74;IGHV3-21;IGHV3-66;IGHV3-23	NA	24.8651	22.8882	21.9799	NA	21.6975	20.6374	21.9552	NA
A0FGR8	Extended synaptotagmin-2	ESYT2	NA	NA	NA	NA	21.0199	NA	20.4116	20.8436	20.2407
A6NHQ2	rRNA/tRNA 2-O-methyltransferase fibrillarin-like protein 1	FBLL1	NA	NA	NA	21.3801	NA	NA	20.3462	21.4549	NA
A6NHR9	Structural maintenance of chromosomes flexible hinge domain-containing protein 1	SMCHD1	NA	NA	18.5205	NA	19.8393	20.1743	19.7593	20.1949	20.1858
O00148	ATP-dependent RNA helicase DDX39A	DDX39A	NA	NA	NA	21.7404	20.9881	20.9894	20.9567	21.8677	20.6936
O00154	Cytosolic acyl coenzyme A thioester hydrolase	ACOT7	NA	NA	NA	21.3259	21.6161	NA	21.6442	21.8632	20.6578
O00159	Unconventional myosin-Ic	MYO1C	NA	17.7858	NA	21.5717	21.0342	20.9117	21.6836	21.5118	21.0818
O00203	AP-3 complex subunit beta-1	AP3B1	NA	NA	NA	21.065	18.4837	NA	20.6476	19.9967	NA
O00231	26S proteasome non-ATPase regulatory subunit 11	PSMD11	NA	NA	NA	NA	19.0743	NA	19.106	19.9556	NA
O00267	Transcription elongation factor SPT5	SUPT5H	NA	NA	NA	20.4341	20.4772	20.7524	20.2194	20.101	20.0411
O00303	Eukaryotic translation initiation factor 3 subunit F	EIF3F	NA	NA	18.4008	22.07	21.2197	20.8178	21.6622	21.4784	20.6154
O00425;Q9NZI8	Insulin-like growth factor 2 mRNA-binding protein 3	IGF2BP3	18.2387	NA	19.731	20.7594	20.3416	20.0726	20.6149	20.483	20.309
O00541	Pescadillo homolog	PES1	NA	NA	18.4865	20.7988	20.7281	20.5337	20.6445	21.3625	19.4859
O00567	Nucleolar protein 56	NOP56	NA	20.0314	20.0392	20.6225	20.8452	20.5794	20.7887	20.9527	19.9297
O00571;O15523;Q9NQI0	ATP-dependent RNA helicase DDX3X;ATP-dependent RNA helicase DDX3Y	DDX3X;DDX3Y	18.3722	20.0792	20.2845	22.5729	21.7541	21.5373	22.7278	22.3149	21.6156
O00767	Acyl-CoA desaturase	SCD	NA	NA	NA	NA	20.2435	20.1863	20.1477	21.2109	NA
O14617	AP-3 complex subunit delta-1	AP3D1	NA	NA	NA	NA	20.3889	NA	NA	20.3478	19.9185
O14646	Chromodomain-helicase-DNA-binding protein 1	CHD1	NA	NA	NA	19.4855	NA	19.6094	19.9784	19.345	19.621
O14980	Exportin-1	XPO1	NA	NA	NA	20.306	19.8858	20.0595	20.6936	19.5449	18.9672
O15042	U2 snRNP-associated SURP motif-containing protein	U2SURP	NA	19.9449	19.1741	NA	20.294	20.0633	NA	20.9268	19.3388
O15226	NF-kappa-B-repressing factor	NKRF	NA	19.8763	20.3654	21.0376	21.2726	21.0356	21.3014	21.2921	20.9752
O15269	Serine palmitoyltransferase 1	SPTLC1	NA	NA	NA	21.1136	NA	NA	20.8776	19.9993	NA
O15371	Eukaryotic translation initiation factor 3 subunit D	EIF3D	NA	17.9309	17.8669	22.0623	21.282	20.8251	22.2446	21.7195	20.7556
O15372	Eukaryotic translation initiation factor 3 subunit H	EIF3H	NA	NA	NA	NA	19.4424	NA	19.62	19.8905	NA
O15479	Melanoma-associated antigen B2	MAGEB2	NA	19.1885	19.1179	21.0697	21.2517	21.1506	21.4053	21.8855	21.2594
O43143;Q14562;O60231	Pre-mRNA-splicing factor ATP-dependent RNA helicase DHX15	DHX15	NA	18.7737	20.1023	20.5884	21.1103	21.3718	20.5044	21.5554	20.7555
O43172	U4/U6 small nuclear ribonucleoprotein Prp4	PRPF4	NA	NA	NA	20.7894	19.9448	20.0748	20.733	20.6747	NA
O43242	26S proteasome non-ATPase regulatory subunit 3	PSMD3	NA	NA	17.4815	22.3587	21.2291	21.1522	22.3581	21.869	21.4095
O43390	Heterogeneous nuclear ribonucleoprotein R	HNRNPR	NA	19.4456	20.0405	NA	NA	20.3788	NA	20.9416	19.748
O43395	U4/U6 small nuclear ribonucleoprotein Prp3	PRPF3	NA	NA	NA	20.8138	NA	21.173	21.5031	20.877	NA
O43542	DNA repair protein XRCC3	XRCC3	NA	NA	NA	20.5124	NA	NA	19.9904	20.9782	NA
O43684	Mitotic checkpoint protein BUB3	BUB3	NA	NA	NA	20.4198	19.441	19.4697	20.4693	20.1675	NA
O43707;P12814	Alpha-actinin-4	ACTN4	19.4482	20.0156	19.6631	20.9581	20.5826	20.7002	19.9736	20.7733	20.8799
O43795;Q9UBC5	Unconventional myosin-Ib	MYO1B	NA	NA	NA	22.008	20.9349	20.8863	21.7001	21.485	21.0405
O43837	Isocitrate dehydrogenase [NAD] subunit beta, mitochondrial	IDH3B	NA	NA	NA	NA	19.5151	NA	20.3344	19.5342	19.4314
O60264;P28370	SWI/SNF-related matrix-associated actin-dependent regulator of chromatin subfamily A member 5	SMARCA5	NA	19.4612	19.9215	21.4194	20.4921	20.7349	20.9164	21.2495	20.0538
O60506	Heterogeneous nuclear ribonucleoprotein Q	SYNCRIP	NA	NA	21.2511	NA	NA	20.869	NA	NA	20.9049
O60684;O15131	Importin subunit alpha-7	KPNA6	NA	NA	NA	NA	19.9112	NA	20.029	20.2677	19.4088
O60762	Dolichol-phosphate mannosyltransferase subunit 1	DPM1	NA	NA	NA	20.6631	NA	NA	18.7201	19.3624	NA
O60884	DnaJ homolog subfamily A member 2	DNAJA2	NA	NA	NA	NA	NA	19.3172	NA	20.8502	20.0013
O75131;Q86YQ8;Q96A23;Q9UBL6;Q8IYJ1;Q96FN4;Q9HCH3;O95741	Copine-3	CPNE3	NA	NA	18.813	NA	NA	19.9776	NA	20.6623	19.8513
O75152;A0A1B0GTU1	Zinc finger CCCH domain-containing protein 11A	ZC3H11A	NA	NA	NA	21.0997	NA	20.3392	20.3328	NA	NA
O75534	Cold shock domain-containing protein E1	CSDE1	NA	18.6578	18.722	NA	19.4693	NA	19.3792	19.9863	19.3798
O75607	Nucleoplasmin-3	NPM3	NA	NA	19.145	NA	20.2933	20.0334	19.2935	NA	20.2214
O75694	Nuclear pore complex protein Nup155	NUP155	NA	NA	NA	21.17	19.9897	20.2319	21.0344	20.696	20.1489
O75821	Eukaryotic translation initiation factor 3 subunit G	EIF3G	NA	NA	NA	20.8349	21.2259	20.6331	21.7368	21.5927	20.7865
O75943	Cell cycle checkpoint protein RAD17	RAD17	NA	NA	NA	NA	21.8743	23.3306	NA	24.4371	NA
O76021	Ribosomal L1 domain-containing protein 1	RSL1D1	NA	20.4995	19.5654	21.3238	21.7119	20.9396	21.0946	21.7595	20.2554
O76094	Signal recognition particle subunit SRP72	SRP72	18.0493	NA	20.4462	21.3622	20.8828	NA	20.9487	20.8247	NA
O94776	Metastasis-associated protein MTA2	MTA2	NA	NA	NA	19.0494	19.5457	NA	20.1581	19.1152	NA
O94832	Unconventional myosin-Id	MYO1D	NA	NA	NA	19.6898	19.9471	19.6706	NA	19.6787	20.2055
O94906	Pre-mRNA-processing factor 6	PRPF6	NA	18.3561	NA	21.3161	21.0028	20.9305	21.4458	21.3484	21.1494
O94973	AP-2 complex subunit alpha-2	AP2A2	NA	NA	NA	NA	NA	20.1998	20.2425	20.548	19.7117
O95299	NADH dehydrogenase [ubiquinone] 1 alpha subcomplex subunit 10, mitochondrial	NDUFA10	NA	NA	NA	21.9795	NA	NA	21.3027	20.9869	19.3987
O95373	Importin-7	IPO7	NA	NA	NA	19.5549	18.7828	19.0017	19.6926	19.6772	NA
O95433	Activator of 90 kDa heat shock protein ATPase homolog 1	AHSA1	NA	NA	NA	22.4381	NA	19.6295	21.5495	NA	NA
O95782	AP-2 complex subunit alpha-1	AP2A1	NA	NA	NA	21.6346	21.3417	21.2189	21.7249	20.9041	21.007
O95793	Double-stranded RNA-binding protein Staufen homolog 1	STAU1	19.6368	19.8751	20.9353	20.6553	20.646	21.3583	20.762	21.4127	21.3302
O96019	Actin-like protein 6A	ACTL6A	NA	NA	NA	NA	NA	NA	20.344	20.9768	20.0393
P00338;P07864;Q6ZMR3	L-lactate dehydrogenase A chain	LDHA	20.2858	18.9948	19.5772	NA	20.57	NA	NA	20.8916	20.739
P02545	Prelamin-A/C;Lamin-A/C	LMNA	19.4008	19.7706	19.7639	21.8783	21.8867	21.9846	21.8255	21.7488	21.5623
P04075	Fructose-bisphosphate aldolase A	ALDOA	20.5815	19.6504	NA	NA	NA	NA	20.2363	NA	NA
P04083	Annexin A1	ANXA1	20.8792	NA	18.6749	NA	19.3594	19.0733	NA	NA	19.1528
P04406	Glyceraldehyde-3-phosphate dehydrogenase	GAPDH	20.9545	20.4956	20.2481	NA	21.2222	21.6759	21.5656	22.0555	21.8787
P04792	Heat shock protein beta-1	HSPB1	21.3428	18.9851	19.8367	22.6464	22.9279	22.7988	22.6603	23.1739	22.4868
P04843	Dolichyl-diphosphooligosaccharide--protein glycosyltransferase subunit 1	RPN1	NA	18.8695	19.0031	21.8885	21.2327	20.5584	21.2717	21.3764	20.6863
P04899;P08754;P63096;P19087;A8MTJ3;P11488;P63092;P09471;Q5JWF2;P38405	Guanine nucleotide-binding protein G(i) subunit alpha-2;Guanine nucleotide-binding protein G(k) subunit alpha;Guanine nucleotide-binding protein G(i) subunit alpha-1;Guanine nucleotide-binding protein G(t) subunit alpha-2;Guanine nucleotide-binding protein G(t) subunit alpha-3;Guanine nucleotide-binding protein G(t) subunit alpha-1;Guanine nucleotide-binding protein G(s) subunit alpha isoforms sh…	GNAI2;GNAI3;GNAI1;GNAT2;GNAT3;GNAT1;GNAS;GNAO1;GNAL	NA	18.0389	18.2891	21.5326	21.0382	20.0044	21.3202	20.8537	19.9037
P05023;P13637	Sodium/potassium-transporting ATPase subunit alpha-1;Sodium/potassium-transporting ATPase subunit alpha-3	ATP1A1;ATP1A3	NA	NA	NA	21.2671	20.9637	20.5702	21.2969	NA	20.338
P05141;Q9H0C2	ADP/ATP translocase 2;ADP/ATP translocase 2, N-terminally processed	SLC25A5	NA	NA	NA	23.7087	23.2699	23.5207	23.8166	24.3878	22.9651
P05198	Eukaryotic translation initiation factor 2 subunit 1	EIF2S1	NA	NA	NA	21.2795	21.5511	NA	21.6045	NA	20.6536
P05387	60S acidic ribosomal protein P2	RPLP2	NA	NA	19.9375	NA	NA	21.2226	NA	20.7828	20.951
P05388;Q8NHW5	60S acidic ribosomal protein P0;60S acidic ribosomal protein P0-like	RPLP0;RPLP0P6	19.7365	21.9369	23.0621	20.8396	20.9737	21.6894	21.1001	21.9355	21.427
P05783;Q92764;CON__H-INV:HIT000015463;CON__Q92764;CON__Q14532	Keratin, type I cytoskeletal 18	KRT18	18.9139	18.6632	20.8179	24.17	23.8999	23.3024	24.0693	24.0961	23.6647
P06493;P50750;Q00536;Q00537;O94921;Q07002;Q00535;P11802;Q96Q40	Cyclin-dependent kinase 1	CDK1	NA	NA	NA	21.8935	21.952	NA	22.1487	21.4115	22.2455
P06576	ATP synthase subunit beta, mitochondrial	ATP5B	18.3988	20.1664	19.2725	22.2641	22.1211	21.1986	21.9938	22.1359	21.4045
P06702	Protein S100-A9	S100A9	23.5863	NA	NA	NA	NA	22.2123	20.308	NA	NA
P06733;P13929;P09104	Alpha-enolase	ENO1	20.6542	20.8041	20.5438	21.847	21.5329	21.9187	22.041	21.5218	21.4539
P06737;P11216;P11217	Glycogen phosphorylase, liver form;Glycogen phosphorylase, brain form;Glycogen phosphorylase, muscle form	PYGL;PYGB;PYGM	NA	NA	NA	20.2808	NA	19.5057	20.7923	20.0858	NA
P06744;CON__Q3ZBD7	Glucose-6-phosphate isomerase	GPI	NA	NA	NA	19.7112	19.1118	NA	19.8471	19.3848	19.0345
P06748	Nucleophosmin	NPM1	19.3613	21.6167	21.4935	21.7269	21.6894	21.5719	21.8811	22.5641	21.248
P07195	L-lactate dehydrogenase B chain	LDHB	NA	NA	NA	NA	22.5784	NA	NA	22.1074	22.295
P07237	Protein disulfide-isomerase	P4HB	NA	NA	18.9402	NA	NA	19.5246	NA	NA	19.4102
P07305	Histone H1.0;Histone H1.0, N-terminally processed	H1F0	18.7394	19.2116	19.6722	NA	NA	NA	NA	NA	NA
P07355;A6NMY6	Annexin A2;Putative annexin A2-like protein	ANXA2;ANXA2P2	21.3894	NA	19.6284	23.141	21.9067	21.4819	23.2872	21.9794	21.1421
P07437;A6NNZ2;Q9H4B7;CON__ENSEMBL:ENSBTAP00000025008	Tubulin beta chain	TUBB	19.6364	19.4748	20.8154	23.6211	23.0328	22.3736	23.5411	23.5196	23.001
P07814	Bifunctional glutamate/proline--tRNA ligase;Glutamate--tRNA ligase;Proline--tRNA ligase	EPRS	18.4961	19.6002	19.8825	20.7479	20.731	20.4711	21.0924	21.0828	20.4846
P07900;Q58FG0	Heat shock protein HSP 90-alpha	HSP90AA1	20.2447	20.2494	20.278	22.1648	21.3858	21.6162	22.2364	21.386	20.5482
P07910;O60812;B7ZW38;B2RXH8;P0DMR1	Heterogeneous nuclear ribonucleoproteins C1/C2;Heterogeneous nuclear ribonucleoprotein C-like 1;Heterogeneous nuclear ribonucleoprotein C-like 3;Heterogeneous nuclear ribonucleoprotein C-like 2;Heterogeneous nuclear ribonucleoprotein C-like 4	HNRNPC;HNRNPCL1;HNRNPCL3;HNRNPCL2;HNRNPCL4	20.0357	21.6548	22.2911	21.9632	22.4106	21.9036	22.2018	22.2115	21.8301
P08195	4F2 cell-surface antigen heavy chain	SLC3A2	NA	NA	18.9283	21.2364	20.3206	20.3661	20.7609	20.6563	20.4916
P08237	ATP-dependent 6-phosphofructokinase, muscle type	PFKM	NA	NA	NA	20.8286	20.217	NA	20.9049	20.0347	NA
P08238;Q58FF7;Q14568;Q58FF6;Q58FG1	Heat shock protein HSP 90-beta	HSP90AB1	19.3455	20.0801	20.3949	23.5015	22.6011	22.3789	23.558	22.6861	22.4699
P08621	U1 small nuclear ribonucleoprotein 70 kDa	SNRNP70	NA	21.3687	22.0995	NA	21.8068	22.0736	NA	22.0068	NA
P08727	Keratin, type I cytoskeletal 19	KRT19	NA	NA	NA	22.4649	NA	NA	22.8887	23.4387	NA
P08865	40S ribosomal protein SA	RPSA	18.2892	NA	19.8183	19.1092	20.0592	20.0114	19.5866	20.3003	20.5338
P09012	U1 small nuclear ribonucleoprotein A	SNRPA	NA	19.6272	20.4717	NA	NA	NA	NA	NA	20.0487
P09622	Dihydrolipoyl dehydrogenase, mitochondrial	DLD	NA	NA	NA	NA	20.1122	NA	NA	20.5535	19.493
P09651;Q32P51	Heterogeneous nuclear ribonucleoprotein A1;Heterogeneous nuclear ribonucleoprotein A1, N-terminally processed	HNRNPA1	21.5323	22.5417	23.1814	21.6297	22.1452	23.1011	22.0302	22.9629	22.9917
P09874	Poly [ADP-ribose] polymerase 1	PARP1	NA	19.306	19.7957	22.1085	21.8051	21.5564	21.9522	22.2236	21.3799
P0CG48;P0CG47;P62979;P62987	Polyubiquitin-C;Ubiquitin;Polyubiquitin-B;Ubiquitin;Ubiquitin-40S ribosomal protein S27a;Ubiquitin;40S ribosomal protein S27a;Ubiquitin-60S ribosomal protein L40;Ubiquitin;60S ribosomal protein L40	UBC;UBB;RPS27A;UBA52	NA	19.6806	19.5245	24.7671	24.1449	23.9781	24.7293	24.5056	24.746
P0DMV8;P0DMV9	Heat shock 70 kDa protein 1A;Heat shock 70 kDa protein 1B	HSPA1A;HSPA1B	18.625	19.2705	19.1437	23.3589	22.7639	22.4866	22.98	22.6023	22.3402
P10809	60 kDa heat shock protein, mitochondrial	HSPD1	18.655	20.9138	20.949	22.4065	21.817	22.023	22.0702	21.9126	21.7938
P11021	78 kDa glucose-regulated protein	HSPA5	18.2003	19.8047	19.9166	23.6908	23.4187	23.3825	23.3915	23.31	23.0368
P11142;P54652	Heat shock cognate 71 kDa protein	HSPA8	18.8286	19.5496	20.1282	24.74	23.5657	23.6808	23.9363	23.6484	23.6655
P11166	Solute carrier family 2, facilitated glucose transporter member 1	SLC2A1	NA	NA	NA	21.6535	21.1714	20.984	21.0089	21.1921	20.5799
P11387;Q969P6	DNA topoisomerase 1	TOP1	19.5398	19.6831	20.7703	22.4104	22.3336	21.9542	22.4833	22.6864	21.4445
P11586	C-1-tetrahydrofolate synthase, cytoplasmic;Methylenetetrahydrofolate dehydrogenase;Methenyltetrahydrofolate cyclohydrolase;Formyltetrahydrofolate synthetase;C-1-tetrahydrofolate synthase, cytoplasmic, N-terminally processed	MTHFD1	NA	NA	NA	20.9887	20.0707	20.4349	21.9988	20.4858	19.9757
P11940;Q9H361;Q4VXU2;Q13310;Q96DU9;Q5JQF8	Polyadenylate-binding protein 1	PABPC1	NA	19.7748	21.0108	20.6335	20.6712	20.8496	20.469	20.6002	20.7273
P12236;P12235	ADP/ATP translocase 3;ADP/ATP translocase 3, N-terminally processed;ADP/ATP translocase 1	SLC25A6;SLC25A4	NA	NA	NA	22.0244	21.5583	21.411	21.7819	21.8748	20.9405
P12268;P20839	Inosine-5-monophosphate dehydrogenase 2	IMPDH2	NA	19.31	19.6608	NA	20.5197	20.9225	21.0713	21.475	20.8843
P12429	Annexin A3	ANXA3	NA	NA	NA	NA	19.9194	19.9559	20.1661	NA	NA
P12956	X-ray repair cross-complementing protein 6	XRCC6	NA	19.2634	19.4694	21.5305	21.3974	21.2253	21.5642	21.597	20.8574
P13010	X-ray repair cross-complementing protein 5	XRCC5	NA	NA	18.7397	22.1099	20.8837	20.221	21.7592	21.5627	20.6668
P13639	Elongation factor 2	EEF2	18.4161	20.249	20.6132	21.6757	21.785	21.9409	22.0444	22.0088	22.1035
P13667	Protein disulfide-isomerase A4	PDIA4	NA	19.409	18.8933	21.4193	21.1727	20.8893	21.1704	21.2357	20.5432
P14618;P30613	Pyruvate kinase PKM	PKM	18.506	19.164	20.0653	23.1316	22.1447	21.9168	23.2691	22.73	21.8063
P14625	Endoplasmin	HSP90B1	NA	NA	NA	NA	20.0405	19.9802	19.9587	NA	20.2609
P14678;P63162	Small nuclear ribonucleoprotein-associated proteins B and B;Small nuclear ribonucleoprotein-associated protein N	SNRPB;SNRPN	NA	20.5509	21.2724	NA	20.3721	21.8037	NA	21.7792	20.7758
P14866	Heterogeneous nuclear ribonucleoprotein L	HNRNPL	19.8685	20.8402	22.0974	21.835	21.7106	22.1491	21.6799	21.5577	21.3951
P14868	Aspartate--tRNA ligase, cytoplasmic	DARS	NA	NA	18.6826	20.4158	20.1057	NA	19.9577	21.1068	19.7707
P15311;P35241;P26038	Ezrin	EZR	NA	19.356	20.0087	20.8367	21.1967	21.2098	20.7583	21.5836	21.7174
P15880	40S ribosomal protein S2	RPS2	NA	NA	20.8674	22.5293	22.732	22.5203	22.7228	23.2019	22.619
P15924	Desmoplakin	DSP	20.8574	NA	19.2851	20.8143	NA	NA	NA	NA	NA
P16403;P10412;P16402;Q02539;P22492	Histone H1.2;Histone H1.4;Histone H1.3	HIST1H1C;HIST1H1E;HIST1H1D	21.1949	22.0094	21.6877	NA	21.171	21.7154	NA	NA	21.9115
P16615;O14983;Q93084	Sarcoplasmic/endoplasmic reticulum calcium ATPase 2	ATP2A2	NA	NA	NA	21.5991	21.1338	20.8142	21.7772	21.3339	20.7452
P17066;P48741	Heat shock 70 kDa protein 6	HSPA6	21.7396	21.3154	22.2893	27.539	24.9784	26.3353	26.7396	26.1972	25.1778
P17812	CTP synthase 1	CTPS1	NA	NA	NA	20.678	19.3589	NA	20.2966	19.7402	19.0766
P17844	Probable ATP-dependent RNA helicase DDX5	DDX5	19.6564	19.9732	21.0912	22.9648	21.8098	22.0669	23.0806	22.7447	21.5913
P17858	ATP-dependent 6-phosphofructokinase, liver type	PFKL	NA	NA	NA	NA	21.0042	19.2538	NA	20.1932	20.8363
P17987	T-complex protein 1 subunit alpha	TCP1	NA	NA	18.6171	21.9573	21.6988	21.1363	21.765	22.2936	21.408
P18077	60S ribosomal protein L35a	RPL35A	NA	NA	NA	19.5038	19.2368	NA	20.5149	20.5247	NA
P18124	60S ribosomal protein L7	RPL7	NA	18.8807	19.1121	22.3672	22.6768	21.6545	22.6818	22.5668	21.8594
P18583	Protein SON	SON	NA	NA	18.7474	19.9099	19.5468	19.7595	19.7847	19.7764	19.8647
P18621	60S ribosomal protein L17	RPL17	NA	NA	19.7998	22.8419	21.9056	22.2314	22.588	22.3523	21.5011
P18754	Regulator of chromosome condensation	RCC1	NA	NA	NA	21.6827	21.1177	NA	21.4198	21.1058	20.0782
P19338	Nucleolin	NCL	20.364	20.7062	21.2762	22.358	21.5593	21.9055	21.3908	22.1473	21.168
P19525	Interferon-induced, double-stranded RNA-activated protein kinase	EIF2AK2	NA	NA	18.4566	21.9061	22.5103	NA	21.9177	NA	21.8765
P20073	Annexin A7	ANXA7	NA	NA	NA	NA	19.4961	NA	21.1636	20.1192	NA
P20700;Q03252	Lamin-B1	LMNB1	NA	NA	NA	NA	20.638	20.0482	19.6342	20.2156	19.5141
P21333;O75369	Filamin-A	FLNA	NA	NA	18.3542	21.0225	20.0344	19.9157	20.2785	19.8566	20.2725
P21796	Voltage-dependent anion-selective channel protein 1	VDAC1	NA	NA	NA	20.9731	NA	18.9608	20.4459	NA	NA
P22087	rRNA 2-O-methyltransferase fibrillarin	FBL	NA	19.8623	20.4887	21.8394	21.7191	21.599	21.8267	22.3505	21.1714
P22102	Trifunctional purine biosynthetic protein adenosine-3;Phosphoribosylamine--glycine ligase;Phosphoribosylformylglycinamidine cyclo-ligase;Phosphoribosylglycinamide formyltransferase	GART	NA	NA	NA	20.7611	20.3837	20.5474	20.7404	20.3962	NA
P22234	Multifunctional protein ADE2;Phosphoribosylaminoimidazole-succinocarboxamide synthase;Phosphoribosylaminoimidazole carboxylase	PAICS	NA	18.3966	NA	NA	NA	19.5228	18.9293	19.4724	19.5481
P22570	NADPH:adrenodoxin oxidoreductase, mitochondrial	FDXR	NA	NA	NA	20.8071	20.8074	19.7653	20.451	20.9839	20.3638
P22626	Heterogeneous nuclear ribonucleoproteins A2/B1	HNRNPA2B1	20.576	22.5903	22.5258	22.1628	22.5763	22.4258	22.6938	22.5325	22.1154
P22695	Cytochrome b-c1 complex subunit 2, mitochondrial	UQCRC2	NA	NA	NA	22.2414	21.3537	20.6939	22.1638	21.5536	20.6641
P23246	Splicing factor, proline- and glutamine-rich	SFPQ	19.2458	20.4581	21.8331	22.9628	21.5857	22.1998	22.7961	22.0415	21.5089
P23258;Q9NRH3	Tubulin gamma-1 chain;Tubulin gamma-2 chain	TUBG1;TUBG2	NA	NA	NA	20.6356	NA	20.394	20.9148	21.1843	20.6562
P23396	40S ribosomal protein S3	RPS3	18.8848	19.963	20.8274	23.2467	22.8169	22.5444	23.023	23.5007	22.5151
P23528;Q9Y281	Cofilin-1	CFL1	20.8537	19.3801	19.7315	21.2615	21.2768	21.1338	20.7722	21.736	20.8203
P24928	DNA-directed RNA polymerase II subunit RPB1	POLR2A	NA	NA	18.9384	NA	19.9462	20.4193	NA	20.645	20.2351
P25205	DNA replication licensing factor MCM3	MCM3	NA	NA	NA	19.6114	NA	19.112	19.8713	19.7818	18.8
P25705	ATP synthase subunit alpha, mitochondrial	ATP5A1	17.9596	18.8668	19.4008	22.971	22.3056	21.8986	22.9421	22.9791	21.7636
P26196	Probable ATP-dependent RNA helicase DDX6	DDX6	NA	NA	NA	22.3408	21.0922	21.1698	22.133	22.0664	21.0629
P26373	60S ribosomal protein L13	RPL13	NA	19.942	NA	22.4917	21.7118	21.3446	21.967	22.1426	21.8736
P26599	Polypyrimidine tract-binding protein 1	PTBP1	19.6318	21.3094	21.4984	22.7666	21.1223	21.5342	21.9001	21.789	21.3466
P26640	Valine--tRNA ligase	VARS	NA	NA	NA	NA	19.8201	NA	20.8609	19.9852	NA
P26641	Elongation factor 1-gamma	EEF1G	18.4811	19.3356	19.8109	21.8789	21.339	20.7972	21.7911	21.658	21.4419
P27635;Q96L21	60S ribosomal protein L10	RPL10	NA	19.2852	19.8772	21.8571	22.1384	21.7729	22.0632	22.6939	21.7176
P27694	Replication protein A 70 kDa DNA-binding subunit;Replication protein A 70 kDa DNA-binding subunit, N-terminally processed	RPA1	NA	NA	NA	21.1583	20.5218	NA	20.011	NA	19.9526
P27708	CAD protein;Glutamine-dependent carbamoyl-phosphate synthase;Aspartate carbamoyltransferase;Dihydroorotase	CAD	NA	17.9983	18.9238	20.5993	20.3787	20.4961	20.3051	20.9257	20.6646
P27816	Microtubule-associated protein 4	MAP4	NA	NA	NA	21.948	21.0021	21.3163	21.9826	21.1671	21.1139
P29692	Elongation factor 1-delta	EEF1D	NA	19.6882	20.1006	NA	21.3534	20.7885	NA	21.0698	NA
P30050	60S ribosomal protein L12	RPL12	NA	NA	21.1048	NA	NA	21.4864	NA	21.3468	NA
P30101	Protein disulfide-isomerase A3	PDIA3	NA	NA	NA	NA	18.1036	19.648	19.1055	19.9718	NA
P30876	DNA-directed RNA polymerase II subunit RPB2	POLR2B	NA	NA	NA	NA	20.1909	20.1965	NA	20.9645	NA
P31153	S-adenosylmethionine synthase isoform type-2	MAT2A	NA	NA	NA	20.3259	20.3121	19.6029	19.8726	19.9091	20.2374
P31689	DnaJ homolog subfamily A member 1	DNAJA1	NA	NA	20.4007	22.2475	20.9416	21.7826	22.1618	22.3548	21.5797
P31942	Heterogeneous nuclear ribonucleoprotein H3	HNRNPH3	NA	19.969	20.6219	20.3378	20.2713	20.5692	20.6186	21.18	20.6195
P31943	Heterogeneous nuclear ribonucleoprotein H;Heterogeneous nuclear ribonucleoprotein H, N-terminally processed	HNRNPH1	20.0716	22.1337	23.0754	22.3989	22.4198	22.6202	22.5039	22.8951	22.4077
P32969	60S ribosomal protein L9	RPL9	NA	NA	NA	NA	20.8637	20.4563	20.464	21.4969	20.3634
P33778;Q99880;Q93079;Q99877;Q16778;P62807;P58876;O60814;Q5QNW6;P23527;Q99879;P57053;P06899;Q8N257;Q96A08;A0A2R8Y619	Histone H2B type 1-B;Histone H2B type 1-L;Histone H2B type 1-H;Histone H2B type 1-N;Histone H2B type 2-E;Histone H2B type 1-C/E/F/G/I;Histone H2B type 1-D;Histone H2B type 1-K;Histone H2B type 2-F;Histone H2B type 1-O;Histone H2B type 1-M;Histone H2B type F-S;Histone H2B type 1-J;Histone H2B type 3-B;Histone H2B type 1-A	HIST1H2BB;HIST1H2BL;HIST1H2BH;HIST1H2BN;HIST2H2BE;HIST1H2BC;HIST1H2BD;HIST1H2BK;HIST2H2BF;HIST1H2BO;HIST1H2BM;H2BFS;HIST1H2BJ;HIST3H2BB;HIST1H2BA	21.4343	20.6504	20.299	21.5562	20.0796	19.5284	NA	20.7125	NA
P33991;Q9UJA3	DNA replication licensing factor MCM4	MCM4	NA	NA	18.8511	21.4463	20.6833	20.5806	21.3293	20.9283	20.5466
P33992	DNA replication licensing factor MCM5	MCM5	NA	NA	NA	20.9508	20.4735	20.4948	20.9129	20.7351	20.7873
P33993	DNA replication licensing factor MCM7	MCM7	NA	18.5855	18.9861	21.7267	21.6743	21.2963	21.5172	21.9358	21.6083
P35030	Trypsin-3	PRSS3	NA	25.2964	25.4855	20.7351	25.077	25.475	20.9461	25.8444	24.623
P35232	Prohibitin	PHB	NA	17.8455	17.8715	19.4272	NA	19.8882	19.2659	20.1842	19.7672
P35251	Replication factor C subunit 1	RFC1	NA	18.5184	NA	NA	20.7822	20.4245	20.3499	20.9886	20.0655
P35268	60S ribosomal protein L22	RPL22	NA	NA	NA	21.7758	20.8104	20.9926	21.7633	21.7729	NA
P35579;P35749;Q7Z406	Myosin-9	MYH9	NA	NA	NA	NA	19.8143	19.9689	NA	20.221	20.2638
P35637	RNA-binding protein FUS	FUS	21.0109	NA	23.1115	21.5988	21.6962	22.1844	21.6886	22.3817	21.7402
P35998	26S protease regulatory subunit 7	PSMC2	NA	NA	NA	20.5061	20.5679	19.9906	20.6898	19.8943	19.9884
P36542	ATP synthase subunit gamma, mitochondrial	ATP5C1	NA	NA	19.1243	23.3042	22.7103	22.4086	22.8391	23.4133	22.3187
P36578	60S ribosomal protein L4	RPL4	19.71	20.6693	20.5437	23.1852	23.2667	22.6918	23.2283	23.6566	22.6717
P38159;Q96E39;O75526;Q8N7X1	RNA-binding motif protein, X chromosome;RNA-binding motif protein, X chromosome, N-terminally processed;RNA binding motif protein, X-linked-like-1	RBMX;RBMXL1	NA	20.5276	21.2427	NA	20.7709	20.8144	NA	21.1961	21.2782
P38646	Stress-70 protein, mitochondrial	HSPA9	19.325	20.1231	20.7696	23.3152	22.7578	22.9571	22.659	22.4944	21.8752
P38919	Eukaryotic initiation factor 4A-III;Eukaryotic initiation factor 4A-III, N-terminally processed	EIF4A3	NA	18.4885	19.3776	22.1397	21.0691	21.0788	22.1466	21.6347	20.6694
P39023;Q92901	60S ribosomal protein L3	RPL3	19.4085	20.2282	19.9949	23.4423	23.1911	22.7043	23.2723	23.3373	23.0694
P39656	Dolichyl-diphosphooligosaccharide--protein glycosyltransferase 48 kDa subunit	DDOST	NA	NA	NA	21.2585	NA	20.0889	21.392	21.226	20.498
P40227;Q92526	T-complex protein 1 subunit zeta	CCT6A	NA	19.63	NA	21.4559	21.577	21.0896	21.575	21.9101	21.2484
P40429;Q6NVV1	60S ribosomal protein L13a	RPL13A	NA	NA	20.1968	22.2932	22.0584	22.2353	22.6614	23.2124	21.5978
P41091;Q2VIR3	Eukaryotic translation initiation factor 2 subunit 3;Putative eukaryotic translation initiation factor 2 subunit 3-like protein	EIF2S3;EIF2S3L	17.7884	NA	NA	21.7037	21.2812	20.6481	22.2642	21.6718	20.961
P41227	N-alpha-acetyltransferase 10	NAA10	NA	NA	NA	NA	20.9109	NA	21.2459	21.224	NA
P41252	Isoleucine--tRNA ligase, cytoplasmic	IARS	NA	NA	NA	19.8247	19.3377	20.0053	19.8463	20.4149	19.4856
P42224	Signal transducer and activator of transcription 1-alpha/beta	STAT1	NA	NA	NA	NA	19.7892	19.2726	20.1678	19.7803	19.7752
P42285	Superkiller viralicidic activity 2-like 2	SKIV2L2	NA	NA	NA	19.9329	19.5383	NA	19.821	19.8429	19.6775
P42704	Leucine-rich PPR motif-containing protein, mitochondrial	LRPPRC	NA	NA	NA	20.8048	19.6911	19.935	20.4269	19.7355	NA
P43243	Matrin-3	MATR3	19.2779	20.4548	20.6984	21.7412	21.4219	21.0537	21.8003	21.5057	20.8502
P43490	Nicotinamide phosphoribosyltransferase	NAMPT	NA	NA	NA	21.6734	21.2854	20.3272	21.3475	21.8182	20.9795
P45880	Voltage-dependent anion-selective channel protein 2	VDAC2	NA	NA	NA	23.2737	22.2296	22.3542	22.9914	22.8299	21.9671
P46013	Antigen KI-67	MKI67	NA	18.6924	18.7453	21.6845	20.9907	21.3107	21.3951	21.2784	20.83
P46087	Probable 28S rRNA (cytosine(4447)-C(5))-methyltransferase	NOP2	NA	19.5591	19.9711	20.1534	21.235	20.9906	20.7273	21.4918	20.733
P46776	60S ribosomal protein L27a	RPL27A	NA	NA	NA	22.0668	22.2345	21.7111	22.4148	23.0643	21.7189
P46777	60S ribosomal protein L5	RPL5	NA	NA	20.4243	22.3422	22.1494	21.6346	22.5515	22.2904	21.7904
P46778	60S ribosomal protein L21	RPL21	17.4434	18.0496	18.5957	22.1215	22.5146	21.7225	21.6801	22.6822	21.6992
P46779	60S ribosomal protein L28	RPL28	NA	NA	NA	22.2113	21.3754	21.2395	22.4501	22.3402	20.9422
P46781	40S ribosomal protein S9	RPS9	NA	NA	NA	22.9634	22.8402	22.6606	22.9461	23.2445	22.5343
P46940;Q86VI3;Q13576	Ras GTPase-activating-like protein IQGAP1	IQGAP1	NA	NA	NA	21.2547	19.6855	19.1295	20.0573	19.7859	19.2926
P47897	Glutamine--tRNA ligase	QARS	NA	NA	NA	NA	NA	19.9667	20.468	20.5836	20.3645
P48444	Coatomer subunit delta	ARCN1	NA	NA	18.1974	21.5069	21.0861	20.7532	21.8092	21.1975	20.9828
P48729;Q8N752	Casein kinase I isoform alpha;Casein kinase I isoform alpha-like	CSNK1A1;CSNK1A1L	NA	NA	NA	20.7191	NA	19.59	20.9032	NA	NA
P48730;P49674	Casein kinase I isoform delta	CSNK1D	NA	NA	NA	21.0449	19.2581	NA	20.9471	19.9954	NA
P49006	MARCKS-related protein	MARCKSL1	NA	19.3736	19.3082	NA	NA	NA	NA	NA	18.8002
P49207	60S ribosomal protein L34	RPL34	20.1303	20.927	21.9528	22.5189	22.2747	22.3486	22.1439	22.3644	22.0649
P49327	Fatty acid synthase;[Acyl-carrier-protein] S-acetyltransferase;[Acyl-carrier-protein] S-malonyltransferase;3-oxoacyl-[acyl-carrier-protein] synthase;3-oxoacyl-[acyl-carrier-protein] reductase;3-hydroxyacyl-[acyl-carrier-protein] dehydratase;Enoyl-[acyl-carrier-protein] reductase;Oleoyl-[acyl-carrier-protein] hydrolase	FASN	NA	18.9392	19.1178	21.8414	21.1298	21.2057	21.8696	21.3521	21.1359
P49368	T-complex protein 1 subunit gamma	CCT3	NA	19.204	19.5714	21.1755	21.0607	20.9642	21.2899	21.7367	21.3523
P49411	Elongation factor Tu, mitochondrial	TUFM	NA	19.334	19.4972	22.7724	22.2964	21.8857	22.7037	22.919	21.7362
P49750	YLP motif-containing protein 1	YLPM1	NA	NA	NA	NA	NA	20.3103	20.0682	20.4623	20.1291
P49841	Glycogen synthase kinase-3 beta	GSK3B	NA	NA	NA	21.2221	NA	NA	21.2093	20.4999	NA
P50416	Carnitine O-palmitoyltransferase 1, liver isoform	CPT1A	NA	NA	NA	21.1224	20.6732	20.5126	21.1024	20.6136	20.2666
P50454	Serpin H1	SERPINH1	NA	18.19	18.4825	21.76	21.0286	20.293	22.0123	21.4478	20.8748
P50570;Q9UQ16;Q05193	Dynamin-2;Dynamin-3	DNM2;DNM3	NA	NA	NA	19.9323	NA	NA	20.1139	20.5101	NA
P50914	60S ribosomal protein L14	RPL14	19.7337	20.2952	20.7267	22.3808	22.7545	21.9871	22.4048	23.0398	21.9884
P50990	T-complex protein 1 subunit theta	CCT8	NA	19.5138	18.7631	20.0252	20.5277	20.3547	19.6491	20.1809	20.2696
P50991	T-complex protein 1 subunit delta	CCT4	NA	NA	19.3028	21.0009	20.6235	20.5994	20.9972	21.1826	20.7022
P51114;Q06787	Fragile X mental retardation syndrome-related protein 1	FXR1	NA	NA	20.0301	20.9504	20.8017	21.2349	20.607	21.445	20.8224
P51991	Heterogeneous nuclear ribonucleoprotein A3	HNRNPA3	NA	18.5872	21.4089	22.0246	21.6967	21.6902	21.7633	NA	22.6249
P52272	Heterogeneous nuclear ribonucleoprotein M	HNRNPM	18.8621	20.4535	20.7224	22.0439	22.015	21.7307	21.9422	22.0485	21.6473
P52292	Importin subunit alpha-1	KPNA2	NA	NA	19.1535	22.1032	21.782	21.154	22.1205	21.7507	21.2547
P52597	Heterogeneous nuclear ribonucleoprotein F;Heterogeneous nuclear ribonucleoprotein F, N-terminally processed	HNRNPF	21.1406	22.6344	22.394	21.4406	21.3587	21.9955	21.8231	21.943	21.4441
P53396	ATP-citrate synthase	ACLY	NA	NA	NA	NA	18.7201	NA	NA	18.9199	18.9552
P53618	Coatomer subunit beta	COPB1	NA	NA	NA	21.8231	20.3101	20.4679	21.812	20.8662	20.1032
P53621	Coatomer subunit alpha;Xenin;Proxenin	COPA	NA	NA	18.8658	21.0666	21.0113	20.5431	21.263	21.0233	20.691
P53985	Monocarboxylate transporter 1	SLC16A1	NA	NA	NA	NA	21.689	21.2436	22.426	22.6972	21.5972
P53992	Protein transport protein Sec24C	SEC24C	NA	NA	NA	20.529	20.0983	NA	20.6426	20.3514	19.5644
P54136	Arginine--tRNA ligase, cytoplasmic	RARS	NA	NA	18.972	20.721	20.7736	20.8233	21.1425	21.4322	20.6958
P54886	Delta-1-pyrroline-5-carboxylate synthase;Glutamate 5-kinase;Gamma-glutamyl phosphate reductase	ALDH18A1	NA	NA	18.8404	21.8312	21.442	21.4908	21.9393	22.3569	21.2668
P55060	Exportin-2	CSE1L	NA	NA	NA	NA	NA	20.2961	NA	20.4822	19.9976
P55084	Trifunctional enzyme subunit beta, mitochondrial;3-ketoacyl-CoA thiolase	HADHB	NA	NA	NA	20.7181	NA	19.5703	21.0029	21.2284	NA
P55795	Heterogeneous nuclear ribonucleoprotein H2	HNRNPH2	NA	NA	20.4459	NA	NA	20.1773	20.3006	21.0394	NA
P55884	Eukaryotic translation initiation factor 3 subunit B	EIF3B	18.6183	NA	18.6816	21.7221	21.4269	20.7888	21.4159	21.8559	21.4717
P56192	Methionine--tRNA ligase, cytoplasmic	MARS	NA	NA	19.1558	21.5276	21.4487	20.8027	20.9925	21.5083	20.8529
P56537	Eukaryotic translation initiation factor 6	EIF6	NA	19.6776	NA	NA	20.7741	NA	NA	21.15	NA
P57088	Transmembrane protein 33	TMEM33	NA	NA	NA	21.356	20.8342	21.3358	21.6304	22.1117	21.3801
P57678	Gem-associated protein 4	GEMIN4	NA	NA	18.2379	NA	19.7772	19.4153	NA	NA	20.2018
P60228	Eukaryotic translation initiation factor 3 subunit E	EIF3E	NA	NA	NA	21.9862	20.9463	NA	21.8817	21.2207	20.8208
P60842;Q14240	Eukaryotic initiation factor 4A-I	EIF4A1	18.2619	18.5439	19.4334	22.9022	21.8832	21.4233	22.6066	22.2485	21.5671
P61247	40S ribosomal protein S3a	RPS3A	NA	19.1882	19.4643	22.3935	21.9277	21.6704	22.8659	22.3219	21.6324
P61254;Q9UNX3	60S ribosomal protein L26;60S ribosomal protein L26-like 1	RPL26;RPL26L1	20.278	19.5498	19.1797	22.6863	22.5951	22.1566	23.0649	23.2807	22.2292
P61313	60S ribosomal protein L15	RPL15	NA	19.8513	19.9189	21.4762	22.0547	22.1337	21.9476	22.6497	21.7602
P61353	60S ribosomal protein L27	RPL27	NA	20.7954	22.0381	20.8212	22.0843	21.9429	20.5816	23.0567	21.6726
P61956;P55854;Q6EEV6	Small ubiquitin-related modifier 2;Small ubiquitin-related modifier 3;Small ubiquitin-related modifier 4	SUMO2;SUMO3;SUMO4	NA	NA	19.3071	21.6939	NA	21.37	NA	22.0999	NA
P61978	Heterogeneous nuclear ribonucleoprotein K	HNRNPK	20.9545	22.2159	21.9408	23.0093	22.1915	22.3539	23.1215	22.6253	22.007
P62081	40S ribosomal protein S7	RPS7	NA	NA	NA	21.4582	22.1096	21.7065	21.556	22.9059	21.6661
P62241	40S ribosomal protein S8	RPS8	19.7346	21.0342	21.657	22.7758	23.4249	23.2484	22.9607	23.7382	23.0019
P62244	40S ribosomal protein S15a	RPS15A	NA	NA	NA	21.818	NA	22.1005	21.3093	21.9515	NA
P62249	40S ribosomal protein S16	RPS16	NA	NA	NA	20.2073	NA	19.1852	20.215	20.5721	NA
P62263	40S ribosomal protein S14	RPS14	NA	NA	19.3258	22.0472	21.4223	21.4717	21.4143	22.1948	21.295
P62266	40S ribosomal protein S23	RPS23	NA	19.3941	NA	23.1734	22.9251	22.4303	22.4732	23.8981	22.7071
P62277	40S ribosomal protein S13	RPS13	NA	NA	NA	21.1361	NA	NA	20.6488	22.0269	NA
P62280	40S ribosomal protein S11	RPS11	NA	21.0569	20.6235	23.0531	23.4799	23.1699	23.2454	23.934	23.079
P62424	60S ribosomal protein L7a	RPL7A	18.9606	21.4529	21.5642	22.486	22.6416	22.4129	22.6848	23.0834	22.4261
P62495	Eukaryotic peptide chain release factor subunit 1	ETF1	NA	18.9178	19.2801	22.1152	22.2363	21.5483	22.1683	22.371	21.566
P62701;Q8TD47;P22090	40S ribosomal protein S4, X isoform	RPS4X	NA	21.123	20.3381	22.6888	21.9485	21.4633	22.9723	22.5677	21.7428
P62750	60S ribosomal protein L23a	RPL23A	NA	NA	19.4134	NA	21.9066	22.0774	22.2189	22.9482	21.8324
P62753	40S ribosomal protein S6	RPS6	18.3543	19.2512	19.3683	22.4809	22.6587	22.4105	22.8051	23.1221	22.655
P62826	GTP-binding nuclear protein Ran	RAN	NA	NA	18.9762	22.5997	23.0064	22.6593	23.0636	23.0639	22.6734
P62829	60S ribosomal protein L23	RPL23	NA	NA	18.6097	21.1541	21.2929	21.4764	20.8163	22.0217	21.3158
P62847	40S ribosomal protein S24	RPS24	19.4061	20.8756	22.0426	22.1129	22.8651	22.5544	22.1039	23.7429	22.6689
P62854;Q5JNZ5	40S ribosomal protein S26;Putative 40S ribosomal protein S26-like 1	RPS26;RPS26P11	NA	20.8903	21.6424	23.0507	NA	23.6325	23.0456	23.9168	NA
P62888	60S ribosomal protein L30	RPL30	NA	19.0998	19.8678	19.9433	20.1271	20.3421	NA	21.2874	19.9027
P62899	60S ribosomal protein L31	RPL31	NA	20.1625	20.2718	NA	21.5124	21.9263	NA	NA	21.7797
P62906	60S ribosomal protein L10a	RPL10A	19.2806	NA	21.5849	20.9088	21.8425	22.3172	20.889	22.4619	21.3111
P62910	60S ribosomal protein L32	RPL32	NA	NA	NA	21.053	NA	19.4417	20.3695	NA	NA
P62913	60S ribosomal protein L11	RPL11	NA	19.9149	20.3584	22.9311	23.1003	22.6676	23.2714	22.8816	22.0062
P62917	60S ribosomal protein L8	RPL8	20.7392	22.7241	23.3212	23.3282	23.8613	23.3253	23.631	24.1208	23.8048
P63010;Q10567	AP-2 complex subunit beta;AP-1 complex subunit beta-1	AP2B1;AP1B1	NA	NA	NA	20.1625	21.6903	21.2657	19.1309	19.8966	20.8133
P63173	60S ribosomal protein L38	RPL38	NA	NA	NA	NA	NA	19.6467	20.416	20.603	NA
P63244	Guanine nucleotide-binding protein subunit beta-2-like 1;Guanine nucleotide-binding protein subunit beta-2-like 1, N-terminally processed	GNB2L1	NA	18.1438	18.566	21.7729	20.6075	20.7791	21.9323	21.7414	19.6756
P63261	Actin, cytoplasmic 2;Actin, cytoplasmic 2, N-terminally processed	ACTG1	NA	NA	19.4839	NA	20.3639	19.8973	NA	19.9675	21.0683
P67809	Nuclease-sensitive element-binding protein 1	YBX1	NA	21.3539	22.0166	21.3936	21.4017	22.2798	NA	21.8595	22.6501
P68104;Q5VTE0	Elongation factor 1-alpha 1;Putative elongation factor 1-alpha-like 3	EEF1A1;EEF1A1P5	18.7185	NA	19.5502	23.5662	22.0119	21.9582	22.7442	22.9989	22.0501
P68371;Q3ZCM7	Tubulin beta-4B chain	TUBB4B	20.6632	NA	21.4443	23.8566	23.8955	23.5256	23.9288	23.1782	23.5304
P68400;Q8NEV1	Casein kinase II subunit alpha;Casein kinase II subunit alpha 3	CSNK2A1;CSNK2A3	NA	NA	NA	20.1198	20.727	20.3514	20.366	21.074	20.5866
P68431;P84243;Q71DI3;Q16695;Q6NXT2	Histone H3.1;Histone H3.3;Histone H3.2;Histone H3.1t;Histone H3.3C	HIST1H3A;H3F3A;HIST2H3A;HIST3H3;H3F3C	22.1402	NA	NA	NA	21.1754	NA	NA	NA	20.5575
P78344	Eukaryotic translation initiation factor 4 gamma 2	EIF4G2	NA	NA	NA	20.6151	20.4186	19.9126	20.6019	20.3568	19.9171
P78371	T-complex protein 1 subunit beta	CCT2	NA	19.9637	18.6726	NA	NA	20.1059	19.5949	20.5687	20.6525
P78527	DNA-dependent protein kinase catalytic subunit	PRKDC	NA	NA	18.3312	21.3362	20.8932	20.679	21.3342	21.1932	20.7617
P81605	Dermcidin;Survival-promoting peptide;DCD-1	DCD	19.5057	NA	NA	NA	NA	NA	20.5867	19.2452	NA
P82650	28S ribosomal protein S22, mitochondrial	MRPS22	NA	NA	NA	20.8569	20.3023	NA	NA	21.1707	NA
P82675	28S ribosomal protein S5, mitochondrial	MRPS5	NA	NA	NA	20.939	20.4578	19.2645	20.4536	20.5332	19.7369
P83731	60S ribosomal protein L24	RPL24	19.0915	NA	21.0977	22.8519	22.9865	22.5495	22.8862	23.3815	22.9538
P84098	60S ribosomal protein L19	RPL19	19.4735	NA	NA	21.5868	21.3868	21.5912	21.3129	21.6945	21.1502
P84103	Serine/arginine-rich splicing factor 3	SRSF3	NA	NA	22.3842	NA	22.6111	22.9565	NA	22.8996	22.6319
Q00325	Phosphate carrier protein, mitochondrial	SLC25A3	NA	NA	18.8959	23.6165	23.0012	22.5299	23.6612	23.2884	22.555
Q00341	Vigilin	HDLBP	NA	NA	NA	19.2573	NA	NA	19.9744	NA	19.6706
Q00610;P53675	Clathrin heavy chain 1	CLTC	NA	19.1678	18.9861	20.8475	20.1585	20.1572	20.788	20.7574	20.056
Q00839	Heterogeneous nuclear ribonucleoprotein U	HNRNPU	18.7517	20.0977	20.8025	23.2931	22.9706	22.4451	23.2417	23.0794	22.3522
Q01081;P0DN76	Splicing factor U2AF 35 kDa subunit	U2AF1	18.963	20.2717	21.1186	20.3595	NA	NA	NA	NA	NA
Q01085	Nucleolysin TIAR	TIAL1	NA	20.3323	21.294	19.6864	NA	20.5989	19.6561	NA	NA
Q01780	Exosome component 10	EXOSC10	NA	18.1707	18.7149	21.3567	20.9425	20.0835	21.1888	21.2298	20.4975
Q01813	ATP-dependent 6-phosphofructokinase, platelet type	PFKP	NA	NA	NA	21.6659	21.3342	20.8858	21.7916	21.123	20.4637
Q01844	RNA-binding protein EWS	EWSR1	19.7288	NA	21.9979	21.1086	NA	21.6889	21.1131	21.0739	21.0987
Q02543	60S ribosomal protein L18a	RPL18A	NA	NA	19.6626	21.8474	21.6541	20.9534	22.4083	21.9161	21.0555
Q02878	60S ribosomal protein L6	RPL6	19.4536	20.6374	20.5717	22.5737	23.0086	22.17	22.5761	23.2166	22.2225
Q04637;O43432	Eukaryotic translation initiation factor 4 gamma 1	EIF4G1	NA	NA	NA	20.5638	NA	20.9222	NA	20.4557	20.3385
Q06210;O94808	Glutamine--fructose-6-phosphate aminotransferase [isomerizing] 1	GFPT1	NA	NA	NA	20.2266	NA	NA	19.2955	18.7966	NA
Q06830;Q13162;P32119	Peroxiredoxin-1	PRDX1	19.8048	20.3018	20.209	21.2976	21.3405	20.9675	20.4237	21.4073	21.3715
Q07020	60S ribosomal protein L18	RPL18	19.5369	19.7092	19.7629	22.6502	22.5511	22.5312	22.6333	23.0952	22.0928
Q07666;Q5VWX1	KH domain-containing, RNA-binding, signal transduction-associated protein 1	KHDRBS1	20.7709	22.1135	22.5216	20.9094	21.9784	21.7954	22.8256	22.1978	21.921
Q07955	Serine/arginine-rich splicing factor 1	SRSF1	NA	19.8807	20.2607	NA	20.4886	21.7338	NA	21.9247	20.2625
Q08211	ATP-dependent RNA helicase A	DHX9	18.3073	20.3629	20.7952	22.1868	21.581	21.6455	21.6766	21.8531	21.414
Q08945	FACT complex subunit SSRP1	SSRP1	NA	NA	NA	NA	NA	20.4781	NA	20.5316	19.4696
Q10570	Cleavage and polyadenylation specificity factor subunit 1	CPSF1	NA	NA	18.9168	19.1058	19.9369	20.33	NA	20.3495	19.7438
Q12769	Nuclear pore complex protein Nup160	NUP160	NA	NA	NA	NA	20.0765	20.5489	20.6558	NA	19.8589
Q12788	Transducin beta-like protein 3	TBL3	NA	NA	19.0392	NA	19.1715	19.0773	17.8859	19.9481	19.0739
Q12834	Cell division cycle protein 20 homolog	CDC20	NA	NA	NA	NA	NA	19.8435	20.9433	22.6797	20.8883
Q12906	Interleukin enhancer-binding factor 3	ILF3	19.3529	18.7814	19.7342	21.3034	20.1493	20.7055	NA	20.7395	NA
Q12931	Heat shock protein 75 kDa, mitochondrial	TRAP1	NA	17.9295	18.4659	22.2858	21.8023	21.2817	22.2647	22.2393	21.2186
Q13045	Protein flightless-1 homolog	FLII	NA	NA	NA	20.344	19.6032	19.3574	20.0531	20.3418	19.3367
Q13148	TAR DNA-binding protein 43	TARDBP	20.9307	22.5135	22.7628	21.8096	22.1321	22.0825	22.1263	21.971	21.6388
Q13151	Heterogeneous nuclear ribonucleoprotein A0	HNRNPA0	NA	NA	20.1664	23.4471	22.1247	21.4652	23.0671	22.8013	21.7298
Q13200	26S proteasome non-ATPase regulatory subunit 2	PSMD2	NA	NA	NA	19.9398	20.1235	20.0771	20.186	20.0885	19.4492
Q13242	Serine/arginine-rich splicing factor 9	SRSF9	NA	NA	19.2281	NA	20.109	19.8894	NA	20.3665	20.3175
Q13247;Q08170;Q13243	Serine/arginine-rich splicing factor 6;Serine/arginine-rich splicing factor 4	SRSF6;SRSF4	NA	21.5739	22.1711	NA	22.4742	22.7321	NA	23.0713	NA
Q13263	Transcription intermediary factor 1-beta	TRIM28	NA	NA	NA	19.8642	NA	20.5856	20.3237	20.5594	21.0426
Q13347	Eukaryotic translation initiation factor 3 subunit I	EIF3I	NA	NA	NA	20.5844	20.6199	20.2099	21.1365	21.111	19.9643
Q13435	Splicing factor 3B subunit 2	SF3B2	NA	18.7899	NA	21.4044	20.0637	21.2739	20.8666	21.1327	20.6229
Q13509	Tubulin beta-3 chain	TUBB3	NA	NA	NA	22.1141	22.2347	21.6642	22.0235	22.4012	21.3118
Q13573	SNW domain-containing protein 1	SNW1	NA	NA	NA	NA	21.0373	20.5263	NA	20.6203	NA
Q13595	Transformer-2 protein homolog alpha	TRA2A	NA	NA	18.9368	NA	NA	20.424	NA	20.0483	NA
Q13823	Nucleolar GTP-binding protein 2	GNL2	NA	NA	19.1531	21.2091	20.358	21.7097	21.4531	21.756	20.6195
Q13885;Q9BVA1	Tubulin beta-2A chain;Tubulin beta-2B chain	TUBB2A;TUBB2B	NA	NA	18.2911	NA	19.5714	NA	NA	NA	20.2155
Q14103	Heterogeneous nuclear ribonucleoprotein D0	HNRNPD	NA	NA	NA	21.9138	NA	21.6181	21.9071	21.6671	NA
Q14137	Ribosome biogenesis protein BOP1	BOP1	NA	18.9199	19.6521	NA	21.2629	21.0731	NA	21.6516	19.8421
Q14152	Eukaryotic translation initiation factor 3 subunit A	EIF3A	NA	17.8148	18.3218	21.034	20.5276	20.3996	21.3036	20.7273	20.2001
Q14166	Tubulin--tyrosine ligase-like protein 12	TTLL12	NA	NA	NA	NA	20.1563	NA	21.6123	20.1065	NA
Q14498	RNA-binding protein 39	RBM39	NA	19.3005	19.1379	NA	19.904	NA	NA	NA	NA
Q14527	Helicase-like transcription factor	HLTF	NA	NA	NA	20.8128	19.0654	18.7573	19.7552	19.3006	NA
Q14566	DNA replication licensing factor MCM6	MCM6	NA	NA	NA	21.2989	21.1581	20.6958	21.5475	21.3107	20.8483
Q14669	E3 ubiquitin-protein ligase TRIP12	TRIP12	NA	NA	NA	20.1625	20.4366	19.9211	19.9414	20.1076	19.0297
Q14684	Ribosomal RNA processing protein 1 homolog B	RRP1B	NA	NA	NA	20.0216	20.7906	20.802	19.809	21.4059	20.5145
Q14690	Protein RRP5 homolog	PDCD11	NA	19.3009	19.3134	20.863	20.5913	20.5511	20.252	20.9502	19.6951
Q14694	Ubiquitin carboxyl-terminal hydrolase 10	USP10	NA	NA	NA	NA	20.1507	19.7145	20.7646	20.3461	19.421
Q14697	Neutral alpha-glucosidase AB	GANAB	NA	18.8084	19.9145	20.8009	20.8169	20.5114	20.6951	20.9104	20.4435
Q14739	Lamin-B receptor	LBR	NA	NA	NA	21.1764	21.5219	20.7568	20.8995	21.2845	20.855
Q14807	Kinesin-like protein KIF22	KIF22	NA	NA	NA	20.1092	19.5194	19.2249	19.8311	20.0362	NA
Q14839;Q8TDI0;Q12873	Chromodomain-helicase-DNA-binding protein 4	CHD4	NA	NA	NA	20.2707	19.395	19.8653	19.9429	19.721	NA
Q14974	Importin subunit beta-1	KPNB1	NA	NA	NA	NA	19.2386	19.2956	NA	20.0478	20.1393
Q14980	Nuclear mitotic apparatus protein 1	NUMA1	16.8196	18.3537	19.817	21.9957	21.143	21.51	21.5683	21.4254	21.3141
Q15029	116 kDa U5 small nuclear ribonucleoprotein component	EFTUD2	NA	20.0284	20.3993	NA	20.2342	20.7625	NA	20.7383	20.6633
Q15046	Lysine--tRNA ligase	KARS	NA	19.6414	NA	20.3464	21.178	20.0138	19.6792	20.5912	20.0594
Q15084	Protein disulfide-isomerase A6	PDIA6	NA	NA	NA	NA	NA	19.9569	18.9215	19.8183	NA
Q15149;P58107;Q9UPN3	Plectin	PLEC	NA	NA	NA	20.4788	19.9134	20.3125	20.6322	20.1292	20.0271
Q15233	Non-POU domain-containing octamer-binding protein	NONO	19.8815	19.5663	20.93	22.9088	22.4128	21.9377	22.9352	22.6199	22.0678
Q15269	Periodic tryptophan protein 2 homolog	PWP2	NA	NA	NA	NA	19.7246	20.2193	NA	20.878	19.4297
Q15365	Poly(rC)-binding protein 1	PCBP1	17.628	18.726	20.0153	21.4952	20.4196	19.8778	20.5595	21.6222	20.6776
Q15366;P57721	Poly(rC)-binding protein 2;Poly(rC)-binding protein 3	PCBP2;PCBP3	19.1923	17.8528	19.8299	21.1837	20.2958	20.0719	21.6539	21.1632	20.2849
Q15393	Splicing factor 3B subunit 3	SF3B3	NA	NA	19.7104	NA	NA	19.8338	20.2674	21.0514	20.6312
Q15417	Calponin-3	CNN3	NA	NA	NA	NA	NA	19.7182	19.8037	19.5683	NA
Q15555	Microtubule-associated protein RP/EB family member 2	MAPRE2	NA	NA	NA	NA	NA	20.4978	21.0989	21.3399	19.868
Q15637	Splicing factor 1	SF1	NA	NA	20.1033	NA	NA	20.0669	20.6332	NA	20.3464
Q15717;Q12926;P26378	ELAV-like protein 1	ELAVL1	20.3261	20.5754	20.7928	21.034	20.4731	20.8437	20.7012	20.795	20.182
Q15758	Neutral amino acid transporter B(0)	SLC1A5	NA	NA	NA	19.9283	NA	NA	19.8313	19.6266	NA
Q15843	NEDD8	NEDD8	NA	NA	18.2176	NA	20.0235	20.202	NA	19.8281	NA
Q16629	Serine/arginine-rich splicing factor 7	SRSF7	NA	20.8826	21.343	NA	21.5142	22.1968	NA	21.9452	21.4436
Q16630	Cleavage and polyadenylation specificity factor subunit 6	CPSF6	NA	19.5948	19.8599	NA	NA	21.6163	NA	20.6494	21.1744
Q16658	Fascin	FSCN1	NA	NA	NA	20.4771	20.2042	19.9638	NA	20.3929	NA
Q29RF7	Sister chromatid cohesion protein PDS5 homolog A	PDS5A	NA	NA	NA	20.1557	19.1253	18.827	19.5816	19.5812	19.3787
Q3ZCQ8	Mitochondrial import inner membrane translocase subunit TIM50	TIMM50	NA	NA	NA	NA	20.2667	NA	NA	20.0402	20.3166
Q58FF8	Putative heat shock protein HSP 90-beta 2	HSP90AB2P	NA	NA	NA	22.723	NA	19.9869	22.3079	20.5664	NA
Q5BKZ1	DBIRD complex subunit ZNF326	ZNF326	NA	20.5271	20.5017	20.3959	21.2216	21.2171	20.5191	21.2531	20.7243
Q5JVF3	PCI domain-containing protein 2	PCID2	NA	NA	NA	20.8725	20.2283	19.9952	20.6584	20.7952	20.4312
Q5SSJ5	Heterochromatin protein 1-binding protein 3	HP1BP3	NA	19.3366	19.4399	21.8009	21.8138	20.9453	21.6787	22.1332	21.3511
Q5T9A4	ATPase family AAA domain-containing protein 3B	ATAD3B	NA	NA	NA	20.1021	20.7569	19.9284	21.3738	21.1326	20.3889
Q5VVJ2	Histone H2A deubiquitinase MYSM1	MYSM1	NA	NA	NA	26.4201	NA	25.4247	22.7446	NA	25.6977
Q68CQ4	Digestive organ expansion factor homolog	DIEXF	NA	NA	NA	NA	NA	19.5048	NA	19.6815	19.7415
Q68D10	Protein SPT2 homolog	SPTY2D1	NA	NA	NA	NA	21.2395	NA	20.7078	NA	20.5383
Q6P2Q9	Pre-mRNA-processing-splicing factor 8	PRPF8	NA	NA	18.9766	19.8363	19.7953	20.2491	19.9281	20.3132	19.2557
Q6P5R6	60S ribosomal protein L22-like 1	RPL22L1	NA	NA	19.3279	NA	21.071	21.4771	NA	21.432	20.923
Q6RFH5	WD repeat-containing protein 74	WDR74	NA	NA	NA	NA	20.0219	20.2891	NA	20.3736	NA
Q7KZF4	Staphylococcal nuclease domain-containing protein 1	SND1	NA	NA	19.5015	21.1564	20.855	20.5463	21.3582	20.6794	20.3066
Q7KZI7	Serine/threonine-protein kinase MARK2	MARK2	NA	NA	NA	20.703	20.0709	NA	20.7463	20.3501	NA
Q7L014	Probable ATP-dependent RNA helicase DDX46	DDX46	NA	19.8957	19.6547	19.6813	20.2847	20.4122	19.5185	20.5636	19.9748
Q7L0Y3	Mitochondrial ribonuclease P protein 1	TRMT10C	NA	NA	NA	20.4837	NA	NA	20.0863	20.1002	NA
Q7L2E3	Putative ATP-dependent RNA helicase DHX30	DHX30	NA	NA	18.4576	20.8769	20.3859	20.1795	20.9135	20.7521	20.4257
Q7L2H7	Eukaryotic translation initiation factor 3 subunit M	EIF3M	NA	NA	NA	21.776	NA	NA	21.5085	21.3802	NA
Q7Z2W4	Zinc finger CCCH-type antiviral protein 1	ZC3HAV1	NA	19.69	19.2842	20.879	20.5075	20.0081	20.7636	20.6592	20.3368
Q7Z417	Nuclear fragile X mental retardation-interacting protein 2	NUFIP2	NA	NA	NA	NA	18.2443	18.7568	NA	18.775	NA
Q7Z739	YTH domain-containing family protein 3	YTHDF3	NA	NA	NA	21.5366	20.995	20.5893	21.5749	21.6085	NA
Q86VP6;O75155	Cullin-associated NEDD8-dissociated protein 1	CAND1	NA	NA	NA	20.5862	NA	NA	20.8819	19.5069	NA
Q86Y07	Serine/threonine-protein kinase VRK2	VRK2	NA	NA	NA	NA	19.8345	19.7958	NA	21.2657	NA
Q86YP4;Q8WXI9	Transcriptional repressor p66-alpha	GATAD2A	NA	NA	NA	NA	NA	19.663	19.8812	20.2025	19.7473
Q8IVT2	Mitotic interactor and substrate of PLK1	MISP	NA	NA	NA	NA	20.6609	NA	20.266	20.1066	NA
Q8IXT5	RNA-binding protein 12B	RBM12B	19.9749	NA	20.9137	22.9064	22.3913	22.5232	22.8792	22.7615	22.3375
Q8IY37	Probable ATP-dependent RNA helicase DHX37	DHX37	NA	NA	NA	20.2758	20.0841	20.0978	20.0403	20.3123	19.9368
Q8IY81	pre-rRNA processing protein FTSJ3	FTSJ3	NA	19.3742	NA	20.7806	20.6616	20.1715	20.7126	20.9694	19.8502
Q8N163	Cell cycle and apoptosis regulator protein 2	CCAR2	NA	NA	NA	21.2824	21.0967	21.4494	21.5618	21.5684	21.3088
Q8N1F7	Nuclear pore complex protein Nup93	NUP93	NA	NA	18.4035	21.2474	20.8444	19.9162	20.9112	20.5843	20.4632
Q8N5G2	Macoilin	TMEM57	NA	NA	NA	NA	20.6497	20.0622	NA	NA	20.8588
Q8N7H5	RNA polymerase II-associated factor 1 homolog	PAF1	NA	NA	NA	NA	19.8383	20.1033	NA	20.1228	19.0375
Q8NC51	Plasminogen activator inhibitor 1 RNA-binding protein	SERBP1	20.0124	NA	21.3229	NA	21.2279	21.0423	20.6525	21.385	19.9451
Q8NCA5	Protein FAM98A	FAM98A	19.1055	19.3252	20.5579	NA	NA	NA	NA	NA	NA
Q8NDV3	Structural maintenance of chromosomes protein 1B	SMC1B	NA	NA	NA	21.0372	NA	22.4081	NA	22.1137	NA
Q8NE71	ATP-binding cassette sub-family F member 1	ABCF1	NA	NA	NA	20.4719	19.7347	19.9251	20.3718	20.6647	19.596
Q8NHH1	Tubulin polyglutamylase TTLL11	TTLL11	NA	NA	NA	NA	NA	24.2299	22.2876	23.4192	NA
Q8NI27	THO complex subunit 2	THOC2	NA	NA	18.7457	19.7937	20.1807	19.8064	19.6507	20.7602	19.8732
Q8NI36	WD repeat-containing protein 36	WDR36	NA	NA	19.106	NA	20.7648	20.8089	NA	21.0147	19.6841
Q8TDD1	ATP-dependent RNA helicase DDX54	DDX54	NA	NA	NA	21.4885	21.1322	20.6696	20.787	21.0327	NA
Q8TDN6	Ribosome biogenesis protein BRX1 homolog	BRIX1	NA	NA	NA	20.1393	NA	18.7052	19.0355	19.5316	NA
Q8TEQ6	Gem-associated protein 5	GEMIN5	NA	NA	NA	20.1058	18.2343	18.6032	19.6253	19.2834	18.5321
Q8WTT2	Nucleolar complex protein 3 homolog	NOC3L	NA	NA	NA	NA	NA	19.2826	NA	20.0636	19.0392
Q8WUH6	Transmembrane protein 263	TMEM263	NA	NA	NA	NA	19.515	20.8448	NA	20.472	NA
Q8WUM4	Programmed cell death 6-interacting protein	PDCD6IP	NA	NA	NA	21.7979	20.8515	20.216	21.9593	20.7569	21.0204
Q8WVM0	Dimethyladenosine transferase 1, mitochondrial	TFB1M	NA	NA	NA	NA	20.2045	19.2939	19.8239	21.1073	NA
Q8WVX9	Fatty acyl-CoA reductase 1	FAR1	NA	NA	NA	20.5808	20.6818	19.8327	20.9702	20.4042	20.2054
Q8WWM7	Ataxin-2-like protein	ATXN2L	NA	NA	NA	NA	20.0303	NA	18.8838	20.1458	20.7289
Q8WWY3	U4/U6 small nuclear ribonucleoprotein Prp31	PRPF31	NA	NA	NA	NA	20.3985	19.4	21.0057	20.3115	19.2741
Q8WXF1	Paraspeckle component 1	PSPC1	NA	NA	NA	NA	19.9746	19.9647	19.4823	20.0735	20.1236
Q8WYP5	Protein ELYS	AHCTF1	NA	NA	NA	NA	19.5806	20.0158	NA	19.7626	NA
Q92499	ATP-dependent RNA helicase DDX1	DDX1	NA	NA	20.5445	20.1589	20.3794	20.7442	20.2383	21.0537	20.9073
Q92552	28S ribosomal protein S27, mitochondrial	MRPS27	NA	NA	NA	20.3815	20.1765	19.5865	20.7894	NA	NA
Q92598;P34932	Heat shock protein 105 kDa	HSPH1	NA	NA	NA	20.1466	NA	19.3299	20.7487	19.6922	20.3084
Q92621	Nuclear pore complex protein Nup205	NUP205	NA	NA	NA	20.4771	19.4913	NA	19.9611	19.6945	NA
Q92804	TATA-binding protein-associated factor 2N	TAF15	21.6642	22.8591	22.9935	21.9061	21.9429	22.4288	22.6483	22.4107	21.9003
Q92841	Probable ATP-dependent RNA helicase DDX17	DDX17	20.1627	20.6376	21.1427	21.9407	21.4611	21.7036	22.0552	22.1226	21.3654
Q92922	SWI/SNF complex subunit SMARCC1	SMARCC1	NA	NA	NA	NA	20.3305	20.2459	NA	20.1417	20.495
Q92925;Q96GM5;Q6STE5	SWI/SNF-related matrix-associated actin-dependent regulator of chromatin subfamily D member 2	SMARCD2	NA	NA	NA	19.7425	19.5773	18.9424	20.4345	19.845	19.2266
Q92945	Far upstream element-binding protein 2	KHSRP	22.0302	23.304	23.8743	21.4455	22.0055	22.6109	21.2266	22.5662	21.9472
Q93009	Ubiquitin carboxyl-terminal hydrolase 7	USP7	NA	NA	NA	NA	19.3195	19.8081	19.7528	19.773	19.2257
Q969S3	Zinc finger protein 622	ZNF622	NA	NA	NA	20.7218	20.5252	20.2489	19.8877	19.2771	19.9794
Q969V3	Nicalin	NCLN	NA	NA	NA	21.1617	20.4078	19.8432	20.8481	20.9256	19.3314
Q96CW1	AP-2 complex subunit mu	AP2M1	NA	NA	18.8125	21.941	22.1644	21.9412	21.7674	22.7385	22.1024
Q96D46	60S ribosomal export protein NMD3	NMD3	NA	NA	NA	NA	20.6057	NA	NA	20.7576	20.5172
Q96EK5	KIF1-binding protein	KIAA1279	NA	NA	NA	21.3044	20.6963	19.7676	20.8203	20.97	NA
Q96EY1	DnaJ homolog subfamily A member 3, mitochondrial	DNAJA3	NA	NA	NA	21.0968	21.2637	20.9804	20.2846	21.9877	20.8058
Q96GQ7	Probable ATP-dependent RNA helicase DDX27	DDX27	NA	NA	NA	NA	19.1922	NA	19.1545	18.795	NA
Q96HS1	Serine/threonine-protein phosphatase PGAM5, mitochondrial	PGAM5	NA	NA	NA	NA	20.5434	NA	NA	20.4311	19.7392
Q96I24	Far upstream element-binding protein 3	FUBP3	NA	20.0753	20.7177	NA	19.7363	19.7714	19.0751	19.5375	19.8264
Q96KA5	Cleft lip and palate transmembrane protein 1-like protein	CLPTM1L	NA	NA	NA	20.3622	19.4511	19.0383	19.4104	19.8778	NA
Q96MU7	YTH domain-containing protein 1	YTHDC1	NA	NA	NA	NA	20.7179	21.0813	21.7067	21.4957	NA
Q96P70	Importin-9	IPO9	NA	NA	NA	NA	19.2743	18.8029	NA	19.6304	NA
Q96PK6	RNA-binding protein 14	RBM14	20.184	20.7194	21.2279	22.0879	21.4964	21.5862	22.049	22.0664	21.508
Q96RR1	Twinkle protein, mitochondrial	PEO1	NA	NA	NA	NA	19.0531	NA	NA	19.6594	18.3697
Q96T37	Putative RNA-binding protein 15	RBM15	NA	NA	19.0896	21.0277	20.4402	20.8526	21.4167	21.4943	20.3546
Q99575	Ribonucleases P/MRP protein subunit POP1	POP1	NA	NA	NA	NA	19.4769	NA	19.7259	19.3699	18.7066
Q99613;B5ME19	Eukaryotic translation initiation factor 3 subunit C;Eukaryotic translation initiation factor 3 subunit C-like protein	EIF3C;EIF3CL	NA	18.2611	18.503	21.7455	21.0753	20.9228	22.1865	21.3041	20.7857
Q99623	Prohibitin-2	PHB2	NA	18.6455	19.1786	21.6173	22.3143	22.0207	22.073	22.7774	22.0761
Q99661	Kinesin-like protein KIF2C	KIF2C	NA	NA	NA	20.621	NA	20.1298	20.8664	20.4373	20.5805
Q99832	T-complex protein 1 subunit eta	CCT7	NA	NA	NA	20.6322	20.4155	20.1586	20.9431	20.9587	20.3631
Q99848	Probable rRNA-processing protein EBP2	EBNA1BP2	NA	NA	18.5173	NA	18.9453	19.4894	NA	NA	NA
Q9BQ70	Transcription factor 25	TCF25	NA	NA	19.8205	22.0444	22.1428	21.6164	22.2407	22.5264	21.8088
Q9BQE3	Tubulin alpha-1C chain	TUBA1C	NA	NA	NA	22.7926	NA	NA	21.4162	22.2678	NA
Q9BQG0	Myb-binding protein 1A	MYBBP1A	NA	NA	NA	21.6833	19.9461	20.5677	21.0782	20.1532	19.7902
Q9BTE3	Mini-chromosome maintenance complex-binding protein	MCMBP	NA	NA	NA	NA	20.0335	20.1777	NA	20.7205	NA
Q9BUF5	Tubulin beta-6 chain	TUBB6	NA	NA	18.9005	21.4645	21.1277	21.432	21.1698	21.2572	20.66
Q9BUJ2	Heterogeneous nuclear ribonucleoprotein U-like protein 1	HNRNPUL1	19.5304	NA	21.3566	NA	21.2012	21.4021	21.0252	21.3593	20.9555
Q9BVP2	Guanine nucleotide-binding protein-like 3	GNL3	NA	20.2521	19.9495	21.6959	21.749	21.487	21.7577	22.1591	21.5187
Q9BXJ9;Q6N069	N-alpha-acetyltransferase 15, NatA auxiliary subunit	NAA15	NA	NA	NA	21.1158	19.8309	19.9277	21.4209	20.374	19.7834
Q9BXY0	Protein MAK16 homolog	MAK16	NA	NA	NA	NA	NA	NA	19.4994	20.9084	19.8571
Q9BYG3	MKI67 FHA domain-interacting nucleolar phosphoprotein	NIFK	NA	NA	19.2242	19.5939	20.3494	19.7211	19.8681	20.432	NA
Q9BZE4	Nucleolar GTP-binding protein 1	GTPBP4	NA	19.7857	20.3597	22.5166	21.8218	21.7033	21.9685	22.2974	21.4823
Q9BZF1	Oxysterol-binding protein-related protein 8	OSBPL8	NA	NA	NA	20.1053	19.9158	NA	19.8806	19.8422	NA
Q9BZJ0	Crooked neck-like protein 1	CRNKL1	NA	NA	NA	NA	20.9991	20.5317	20.9264	20.7432	20.4548
Q9GZR7	ATP-dependent RNA helicase DDX24	DDX24	17.9864	19.4061	19.9814	21.4388	21.8744	21.8811	21.3867	22.3706	21.6693
Q9H0A0	N-acetyltransferase 10	NAT10	18.2306	19.4415	20.2564	21.9241	21.4498	21.7657	21.8431	22.3937	21.3157
Q9H0D6	5-3 exoribonuclease 2	XRN2	NA	20.4056	19.6934	20.9627	21.8052	21.7255	20.9613	21.8255	21.1144
Q9H0S4	Probable ATP-dependent RNA helicase DDX47	DDX47	NA	19.587	19.7912	22.1963	22.2312	21.7869	22.4709	22.8181	21.8824
Q9H223	EH domain-containing protein 4	EHD4	NA	NA	NA	NA	20.3616	19.5874	20.6141	20.626	19.8982
Q9H4L4	Sentrin-specific protease 3	SENP3	NA	NA	NA	NA	20.6616	19.9552	20.4045	20.5064	NA
Q9H6R0	Putative ATP-dependent RNA helicase DHX33	DHX33	NA	18.7008	19.0642	19.9963	21.1992	NA	19.8851	20.579	NA
Q9H6R4	Nucleolar protein 6	NOL6	NA	NA	18.9129	19.8398	19.3301	19.5032	19.5211	20.2437	19.0806
Q9H7B2	Ribosome production factor 2 homolog	RPF2	NA	NA	NA	19.9274	NA	NA	18.8126	19.4381	NA
Q9H9B4	Sideroflexin-1	SFXN1	NA	NA	NA	NA	21.2474	20.7758	NA	21.2813	20.4698
Q9HCE1	Putative helicase MOV-10	MOV10	NA	19.0832	18.8919	NA	20.0605	20.1551	NA	20.0021	19.8353
Q9NQ29	Putative RNA-binding protein Luc7-like 1	LUC7L	NA	NA	NA	NA	19.7158	20.3826	NA	20.6005	NA
Q9NQ55	Suppressor of SWI4 1 homolog	PPAN	NA	NA	NA	19.9867	20.6444	20.0851	20.2675	20.7555	19.9828
Q9NR30	Nucleolar RNA helicase 2	DDX21	NA	20.0376	20.2303	22.1578	21.7638	21.6779	21.4805	22.1413	20.9176
Q9NRG9	Aladin	AAAS	NA	NA	NA	20.3669	NA	NA	19.9934	19.4367	NA
Q9NSD9	Phenylalanine--tRNA ligase beta subunit	FARSB	NA	NA	NA	NA	19.8775	NA	20.0971	20.5065	NA
Q9NUQ2	1-acyl-sn-glycerol-3-phosphate acyltransferase epsilon	AGPAT5	NA	NA	NA	19.4685	19.9913	19.511	19.4544	20.7062	19.2714
Q9NUQ6	SPATS2-like protein	SPATS2L	NA	19.3046	19.4164	20.3064	20.8607	21.1093	21.4373	21.8918	20.761
Q9NUU7;Q9UMR2;Q9UHL0	ATP-dependent RNA helicase DDX19A;ATP-dependent RNA helicase DDX19B	DDX19A;DDX19B	NA	NA	NA	20.584	19.3205	NA	20.4089	19.7024	19.3064
Q9NVH1	DnaJ homolog subfamily C member 11	DNAJC11	NA	NA	NA	20.6227	20.0557	19.8613	NA	20.5306	20.19
Q9NVI7	ATPase family AAA domain-containing protein 3A	ATAD3A	NA	NA	NA	NA	19.827	18.8684	NA	20.2369	19.6997
Q9NVP1	ATP-dependent RNA helicase DDX18	DDX18	NA	20.5072	20.2632	21.7219	21.5294	21.5497	21.4797	22.1282	21.3205
Q9NW13	RNA-binding protein 28	RBM28	NA	18.364	NA	20.6256	20.9019	20.4432	21.082	21.4972	20.2251
Q9NWH9	SAFB-like transcription modulator	SLTM	NA	18.7347	18.9738	19.8761	19.7038	19.5779	19.182	20.2182	19.0487
Q9NXE4	Sphingomyelin phosphodiesterase 4	SMPD4	NA	NA	NA	NA	20.0929	NA	20.729	20.8745	NA
Q9NY93	Probable ATP-dependent RNA helicase DDX56	DDX56	NA	NA	NA	NA	20.6315	20.315	20.3765	21.0341	20.4661
Q9NYF8	Bcl-2-associated transcription factor 1	BCLAF1	NA	20.2912	20.7439	NA	NA	NA	21.143	21.8991	NA
Q9NZM1	Myoferlin	MYOF	NA	NA	NA	19.645	20.1778	19.4131	18.6078	20.5629	19.9196
Q9P0J1	[Pyruvate dehydrogenase [acetyl-transferring]]-phosphatase 1, mitochondrial	PDP1	NA	NA	NA	19.7289	NA	NA	19.7262	19.3971	NA
Q9P0W8	Spermatogenesis-associated protein 7	SPATA7	23.8883	NA	21.1071	24.8314	24.3629	NA	22.4579	23.8757	24.1968
Q9P258	Protein RCC2	RCC2	NA	NA	18.9901	NA	20.5548	NA	NA	NA	20.6053
Q9P275	Ubiquitin carboxyl-terminal hydrolase 36	USP36	NA	NA	NA	NA	19.3372	NA	NA	20.2544	19.3536
Q9P287	BRCA2 and CDKN1A-interacting protein	BCCIP	NA	NA	NA	20.3479	NA	NA	20.7764	20.0993	20.0197
Q9P2E9;Q8N4C6	Ribosome-binding protein 1	RRBP1	19.8502	20.4399	20.6463	21.5188	21.8589	21.6523	21.3151	22.3185	21.6908
Q9UBU9	Nuclear RNA export factor 1	NXF1	NA	NA	NA	19.6051	NA	19.6564	19.772	NA	19.4433
Q9UBX3	Mitochondrial dicarboxylate carrier	SLC25A10	NA	NA	NA	19.8988	NA	19.4683	19.2213	NA	NA
Q9UG63	ATP-binding cassette sub-family F member 2	ABCF2	NA	NA	19.9742	22.3954	21.9077	21.5091	22.3764	22.3575	21.9242
Q9UHD1	Cysteine and histidine-rich domain-containing protein 1	CHORDC1	NA	NA	NA	21.1563	19.7034	20.0585	21.372	20.8424	19.3143
Q9UHD8	Septin-9	40057	NA	NA	NA	20.1532	20.627	20.4041	20.3155	20.1267	19.5482
Q9UHX1	Poly(U)-binding-splicing factor PUF60	PUF60	NA	NA	20.4797	NA	20.7047	20.1757	20.0917	21.4656	19.7956
Q9UIF9	Bromodomain adjacent to zinc finger domain protein 2A	BAZ2A	NA	NA	18.6083	20.7698	19.9855	20.1953	19.4649	20.7298	19.6315
Q9UMS4	Pre-mRNA-processing factor 19	PRPF19	NA	NA	19.2522	20.1895	20.1038	20.4063	19.3522	20.5519	20.4289
Q9UN86	Ras GTPase-activating protein-binding protein 2	G3BP2	NA	20.2773	NA	NA	21.8368	22.1919	NA	NA	NA
Q9UNQ2	Probable dimethyladenosine transferase	DIMT1	NA	NA	NA	NA	NA	19.4001	19.3075	20.5127	NA
Q9UPP1;O75151	Histone lysine demethylase PHF8;Lysine-specific demethylase PHF2	PHF8;PHF2	NA	NA	NA	NA	19.0242	NA	18.338	19.431	NA
Q9Y230	RuvB-like 2	RUVBL2	NA	18.8087	NA	NA	19.5438	19.5635	19.2307	NA	NA
Q9Y262	Eukaryotic translation initiation factor 3 subunit L	EIF3L	NA	NA	NA	21.7083	20.921	19.8166	21.5119	20.6945	20.4691
Q9Y265	RuvB-like 1	RUVBL1	NA	18.1897	NA	NA	19.7019	19.5533	NA	19.7742	19.6047
Q9Y285	Phenylalanine--tRNA ligase alpha subunit	FARSA	NA	NA	18.4274	20.7348	21.0628	20.0971	20.8891	21.3904	20.5158
Q9Y2L1	Exosome complex exonuclease RRP44	DIS3	NA	NA	NA	20.6556	NA	19.4116	NA	21.0011	NA
Q9Y2R4	Probable ATP-dependent RNA helicase DDX52	DDX52	NA	NA	19.2696	20.9155	20.4092	20.3458	20.6773	21.528	20.57
Q9Y2W1	Thyroid hormone receptor-associated protein 3	THRAP3	NA	NA	NA	NA	21.0154	20.6827	NA	NA	20.5515
Q9Y2X3	Nucleolar protein 58	NOP58	NA	18.9331	20.2971	21.6615	21.9632	21.7887	NA	22.2536	20.9163
Q9Y305	Acyl-coenzyme A thioesterase 9, mitochondrial	ACOT9	NA	NA	NA	20.0547	20.0417	19.0486	19.5624	19.5502	19.1488
Q9Y3I0	tRNA-splicing ligase RtcB homolog	RTCB	NA	19.098	20.278	NA	21.0347	20.3302	NA	21.2799	20.7397
Q9Y490	Talin-1	TLN1	NA	NA	NA	20.1178	18.7435	NA	19.8416	19.088	NA
Q9Y4I1	Unconventional myosin-Va	MYO5A	NA	NA	NA	NA	19.5993	20.1719	NA	NA	19.9042
Q9Y4P3	Transducin beta-like protein 2	TBL2	NA	NA	NA	NA	20.1905	NA	21.1149	20.5267	NA
Q9Y4W2	Ribosomal biogenesis protein LAS1L	LAS1L	NA	NA	NA	19.8584	NA	18.528	19.6415	NA	NA
Q9Y5A9	YTH domain-containing family protein 2	YTHDF2	NA	19.5851	NA	22.2125	21.7318	21.6273	22.4167	22.226	21.8885
Q9Y5J1	U3 small nucleolar RNA-associated protein 18 homolog	UTP18	NA	NA	NA	NA	NA	19.8648	19.3872	20.696	NA
Q9Y678;Q9UBF2	Coatomer subunit gamma-1	COPG1	NA	NA	NA	21.7273	20.8942	20.9211	21.6618	21.1403	20.916
Q9Y6M1	Insulin-like growth factor 2 mRNA-binding protein 2	IGF2BP2	NA	NA	19.5167	20.4973	20.0798	NA	NA	20.5867	NA
