# Supplementary figures and images for: Cohesin-independent STAG proteins interact with RNA and R-loops and promote complex loading
Source: eLife journal article supplement (doi:10.7554/elife.79386), 2023-04-03

Figure 1c Source Data.

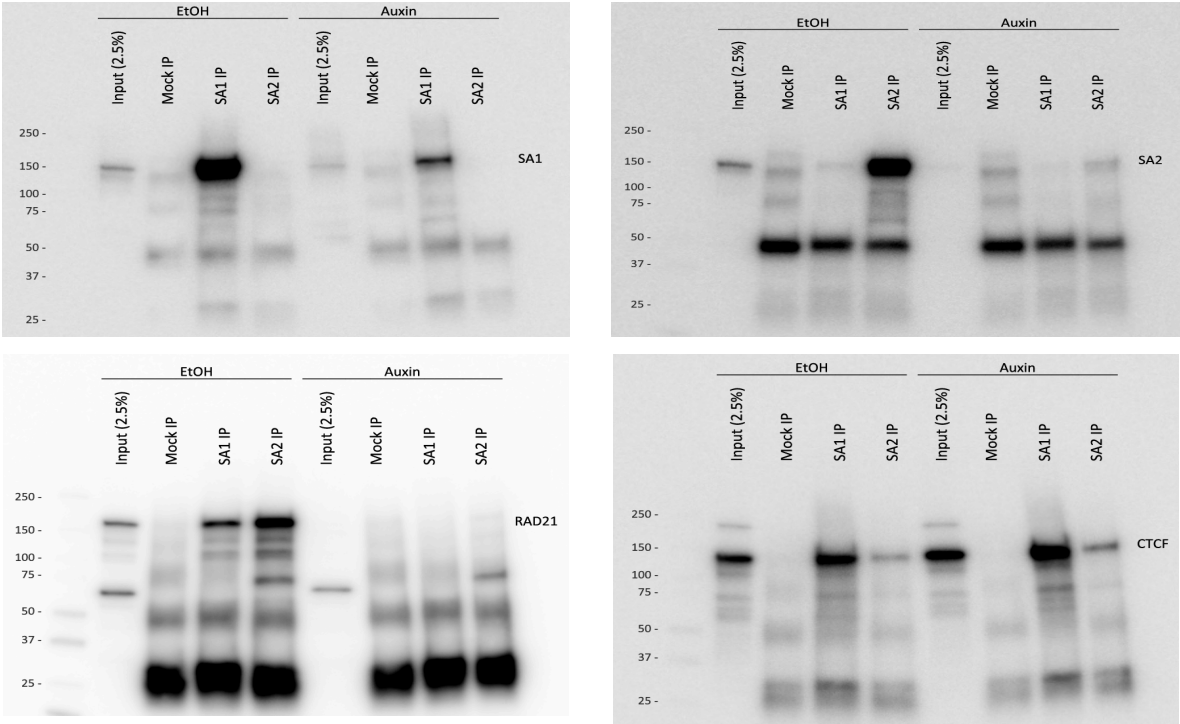

Figure 1d Source Data.

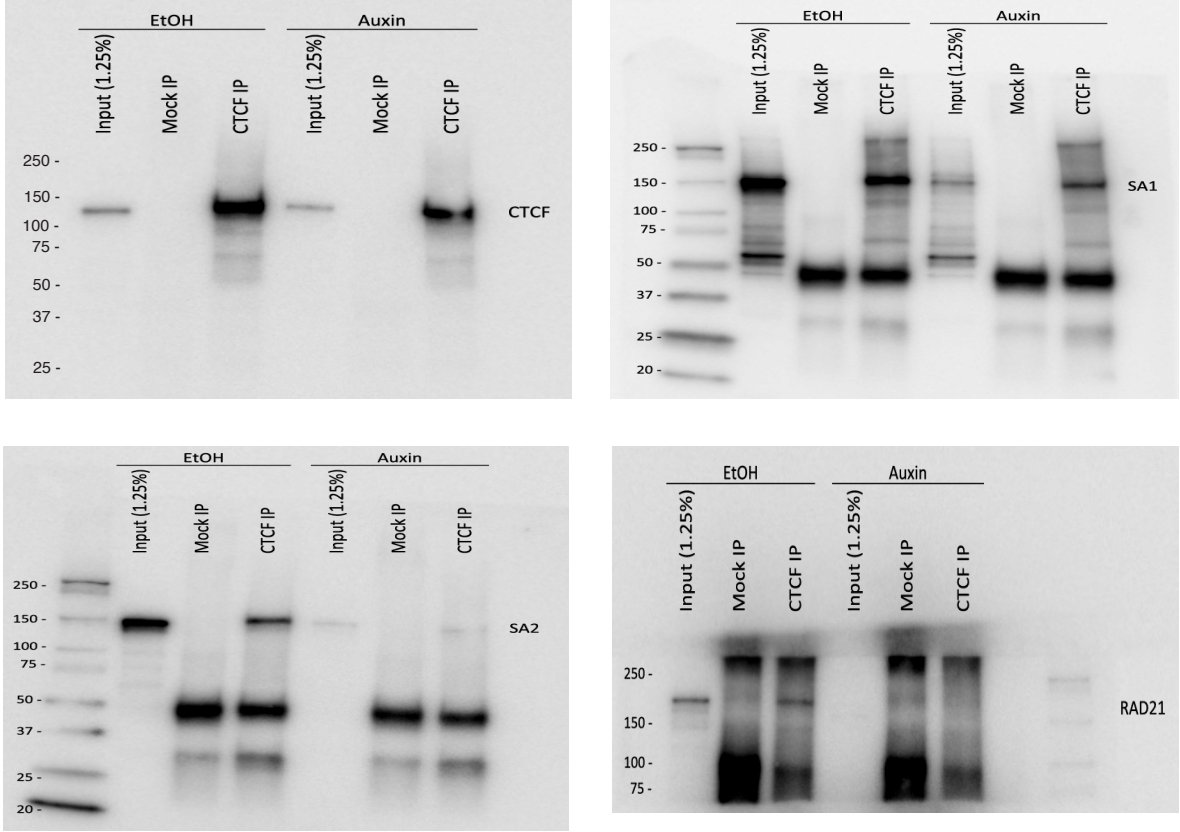

Supplement: fig1-data1 [file Source Data_Figure 1.pdf › Figure 1 - source data 1/Source Data_Figure 1.pdf]

Figure 2a Source Data.

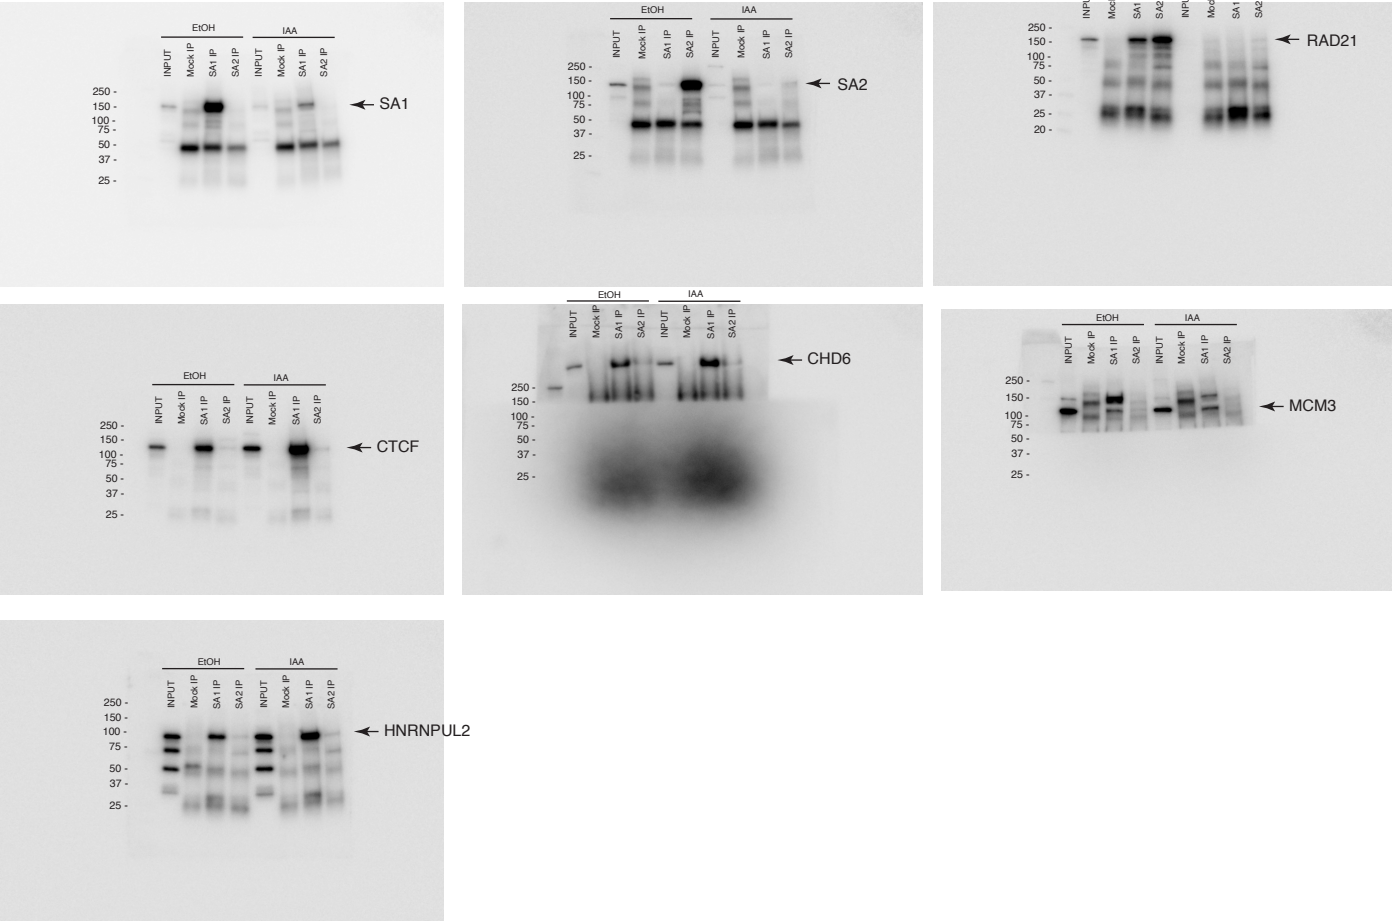

Figure 2d Source Data.

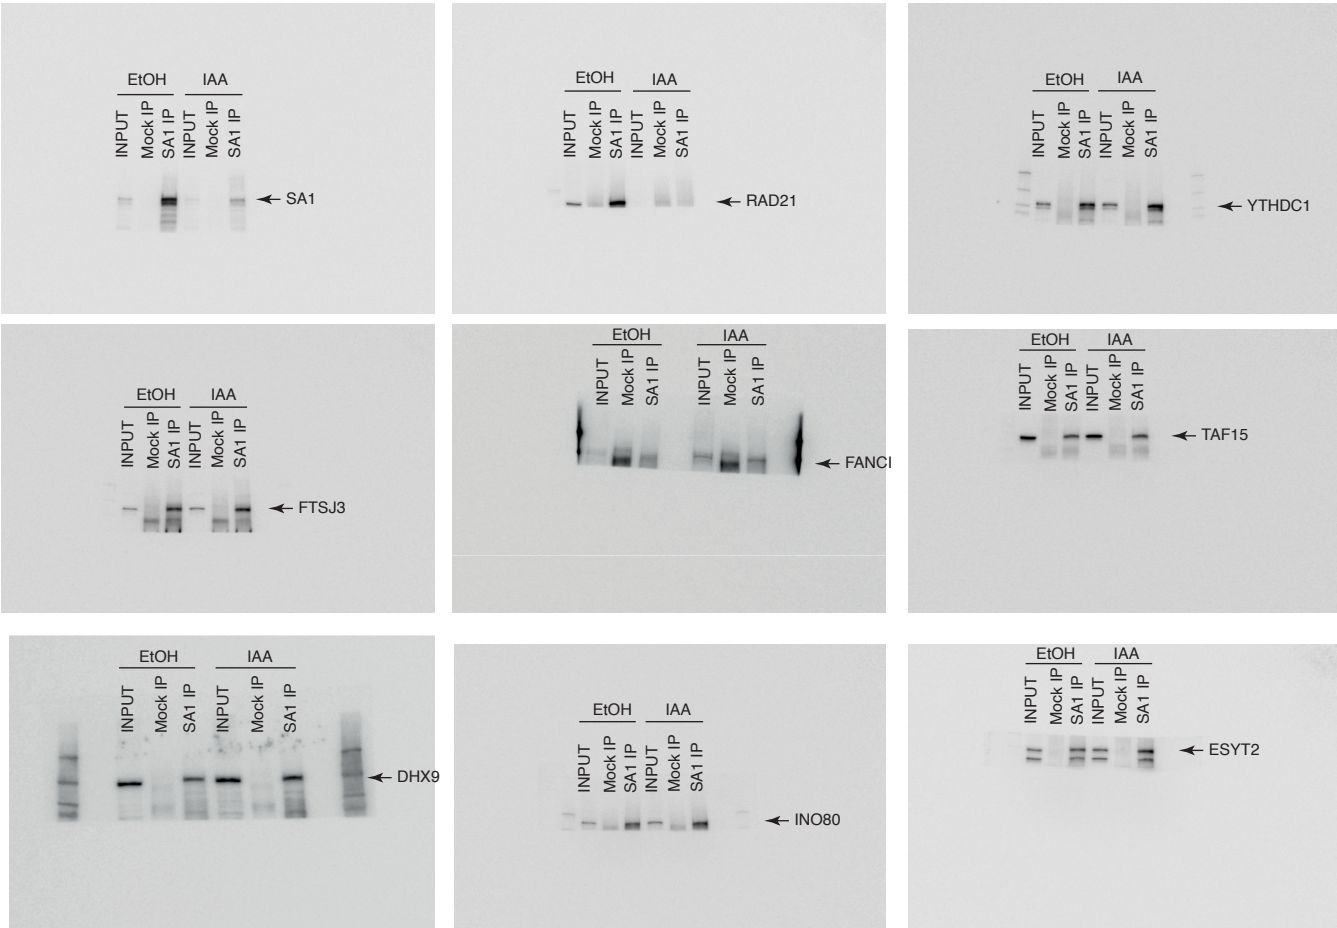

Supplement: fig2-data1 [file Source Data_Figure 2.pdf › Figure 2 - source data 1/Source Data_Figure 2.pdf]

Figure S2b Source Data.

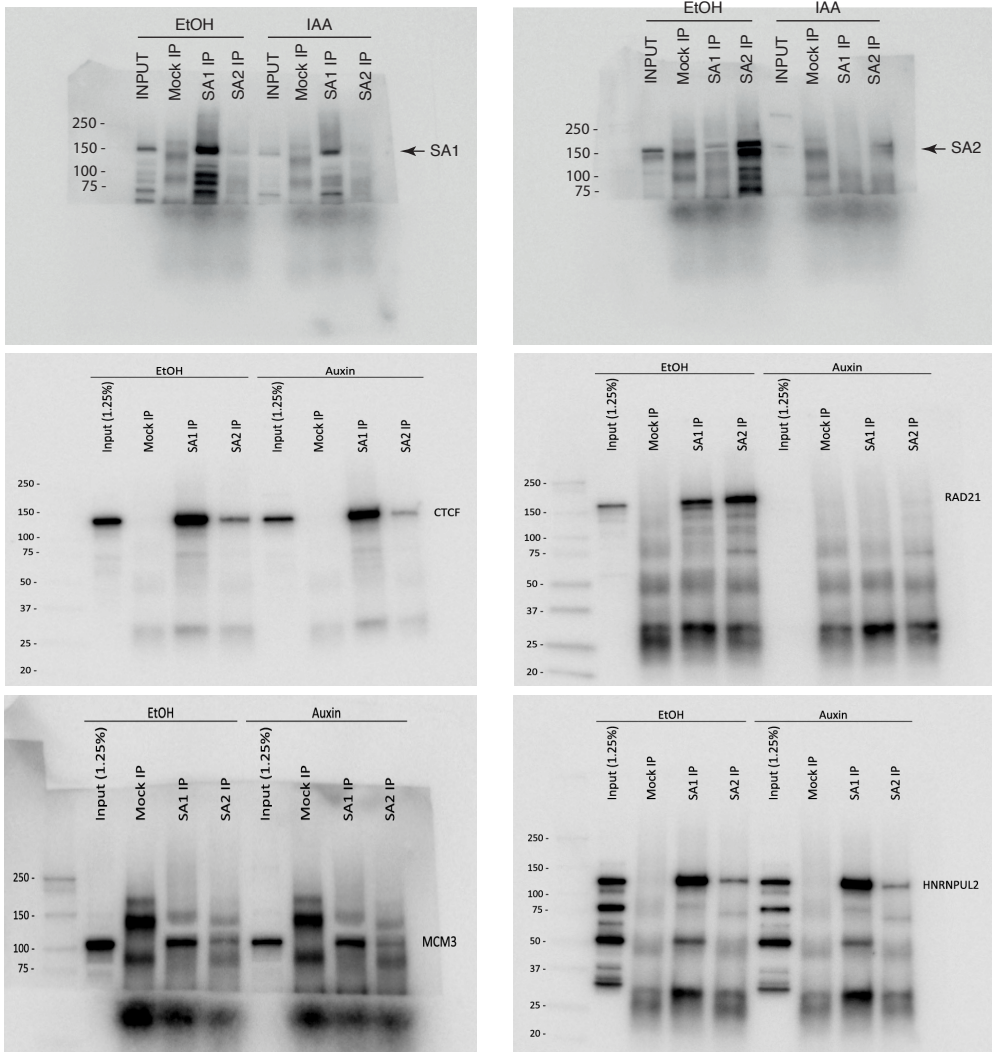

Supplement: fig2-figsupp1-data1 [file Source Data_SUPP Figure 2.pdf › Figure 2 - figure supplement 1 - source data 1/Source Data_SUPP Figure 2.pdf]

Figure 3a Source Data.

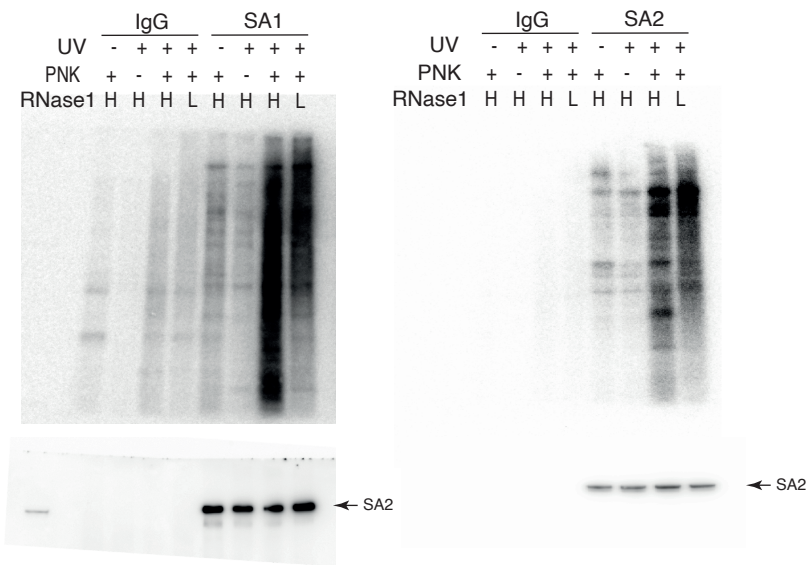

Figure 3b Source Data.

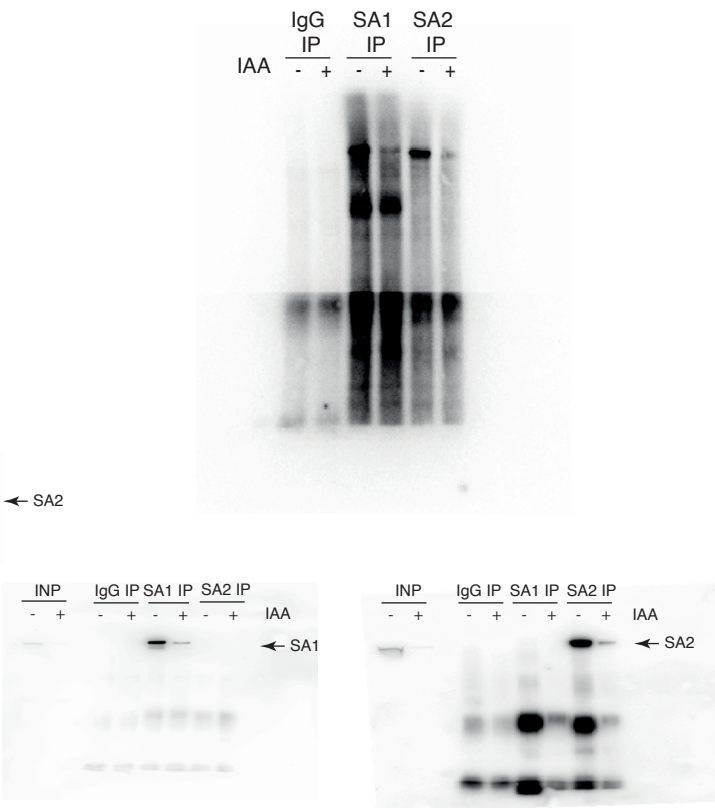

Figure 3g Source Data.

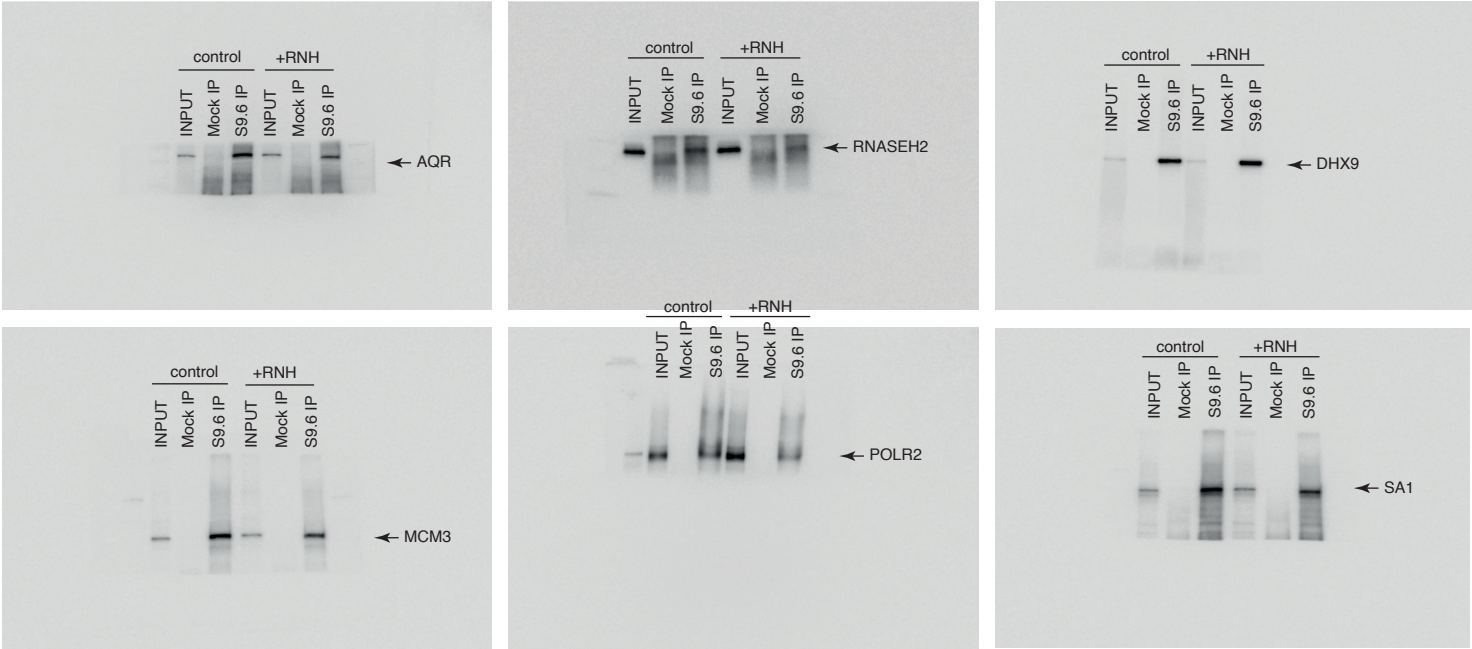

Supplement: fig3-data1 [file Source Data_Figure 3.pdf › Figure 3 - source data 1/Source Data_Figure 3.pdf]

Figure 4d Source Data

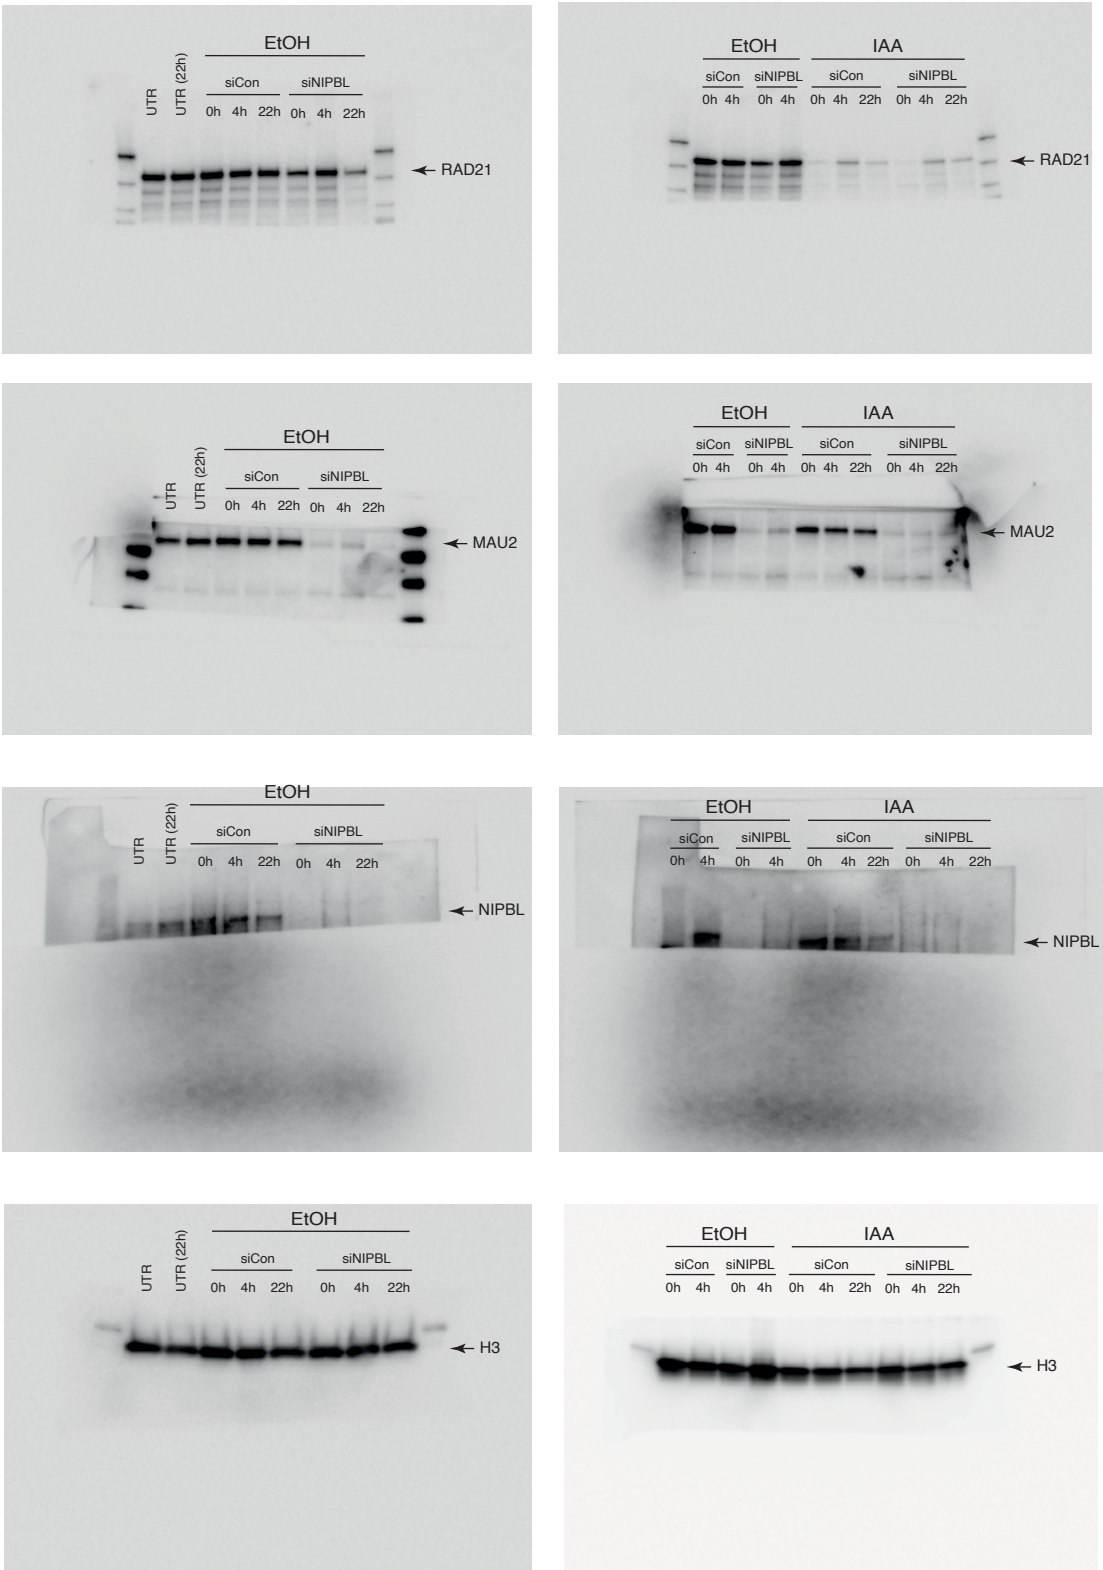

Supplement: fig4-data1 [file Source Data_Figure 4.pdf › Figure 4 - source data 1/Source Data_Figure 4.pdf]

### Figure 4f Source Data

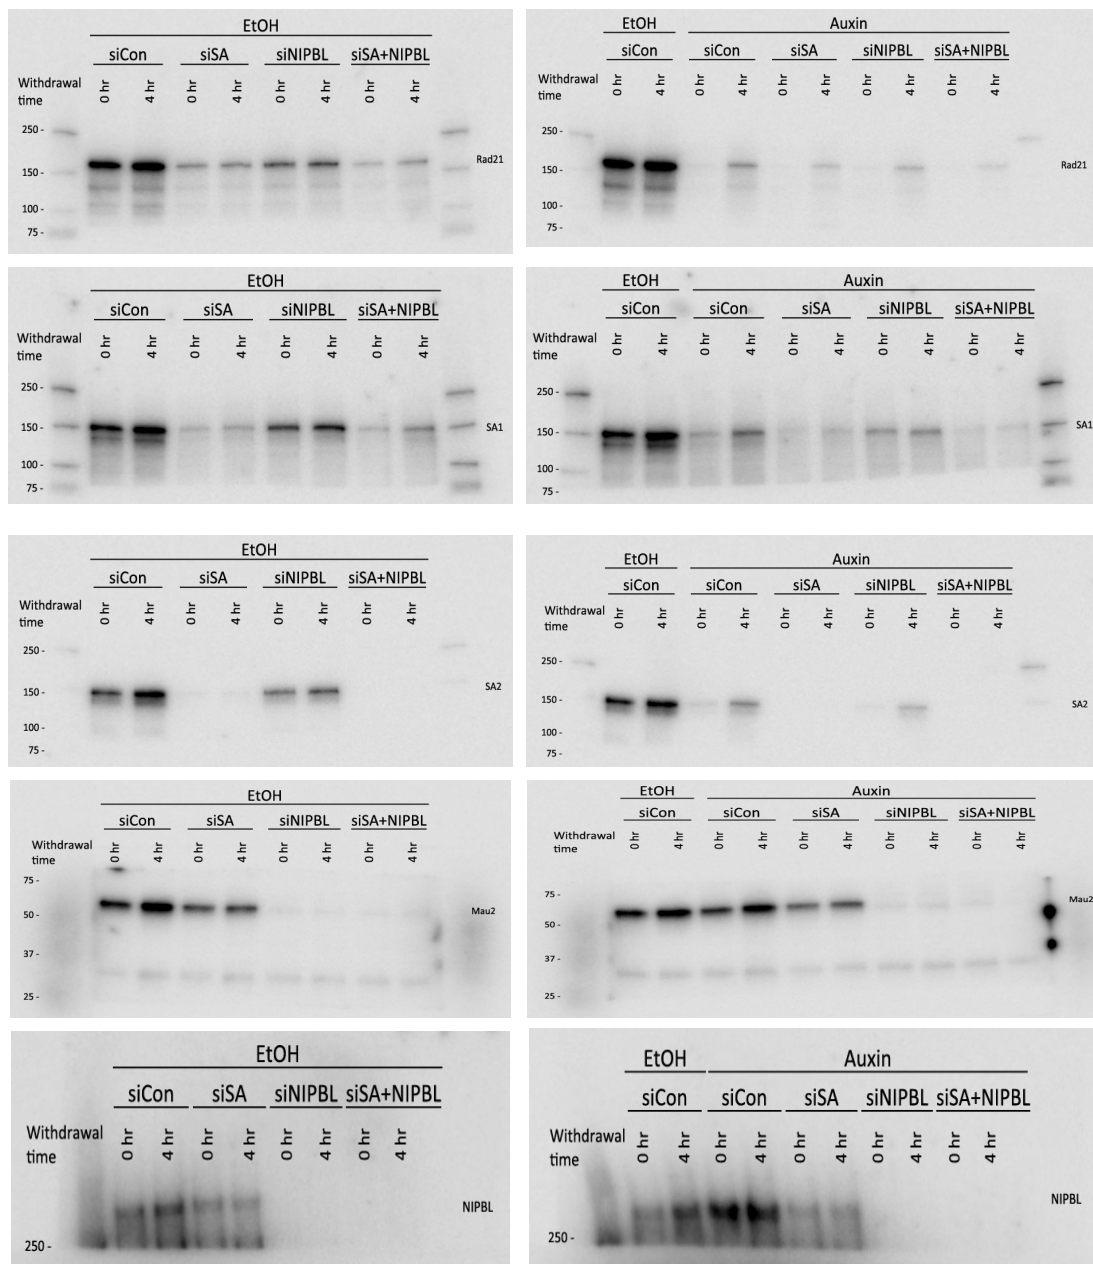

Supplement: fig4-data1 [file Source Data_Figure 4_page2.pdf › Figure 4 - source data 1/Source Data_Figure 4_page2.pdf]
